# Supplementary material for: The infection-tolerant white-footed deermouse tempers interferon responses to endotoxin in comparison to the mouse and rat
Source: eLife. 2024 Jan 9;12:RP90135. doi: 10.7554/eLife.90135 (PMC10945503; doi:10.7554/eLife.90135)
Supplement: Figure 2—source data 1. [file elife-90135-fig2-data1.xlsx]

## Sheet: Sheet1 (2)
Figure 2-Source Data 1. RNA-seq data as TPM values for Peromyscus leucopus females (F) and males (M) treated with LPS (L) or saline alone (C)
transcript_accession	gene_name	product	24845FC	24841FC	24853FC	24842FC	24843FC	24863MC	24861MC	24876MC	24869MC	24852MC	24848FL	24851FL	24847FL	24850FL	24846FL	24865ML	24879ML	24855ML	24873ML	24860ML
XM_028853557.2	Scn1a	sodium channel protein type 1 subunit alpha (LOC114680593), transcript variant X5, mRNA	0	0.02	0	0.00981	0.09	0.00817	0	0.00977	0.01	0	0.02	0	0.02	0	0.04	0.00716	0	0.00779	0.00681	0.00622
XM_028853558.2	Scn3a	sodium voltage-gated channel alpha subunit 3 (Scn3a), transcript variant X8, mRNA	0	0	0.01	0	0.01	0	0	0	0	0	0	0	0	0	0	0	0	0	0	0
XM_028853559.2	Adgrl3	adhesion G protein-coupled receptor L3 (Adgrl3), transcript variant X21, mRNA	0	0	0	0	0	0	0	0	0	0	0	0	0	0	0	0	0	0	0	0
XM_028853561.2	Rptor	regulatory associated protein of MTOR complex 1 (Rptor), transcript variant X1, mRNA	1.3	1.85	1.26	0.57	1.11	1.09	0.9	0.76	1.24	2.02	0.29	0.54	0.39	0.85	0.95	1.61	1.36	0	0	1.04
XM_028853564.2	Rptor	regulatory associated protein of MTOR complex 1 (Rptor), transcript variant X3, mRNA	0.86	1.78	0.54	0	0.18	1.77	1.34	0.68	0.37	0	0	0	0.35	1.57	1.09	0	0	0	0.28	0
XM_028853565.2	Rptor	regulatory associated protein of MTOR complex 1 (Rptor), transcript variant X4, mRNA	0.03	0	0	0.31	0.34	0	0	0.09	0	1.63	0.88	0.52	0.12	0	0	1.09	1.67	0.4	0	0.35
XM_028853566.2	Actg1	actin gamma 1 (Actg1), mRNA	473.69	736.9	424.56	462.68	480.05	724.87	781.16	469.26	503.97	924.17	548.77	880.11	351.42	749.35	528.64	634.55	513.22	201.9	76.66	895.54
XM_028853567.2	Hgs	hepatocyte growth factor-regulated tyrosine kinase substrate (Hgs), transcript variant X2, mRNA	11.76	13.31	6.2	10.61	8.96	11.63	11.81	6.97	9.62	18.55	11.36	15.81	10.14	21.28	13.28	14.16	15.7	2.87	0.4	21.36
XM_028853568.2	Hgs	hepatocyte growth factor-regulated tyrosine kinase substrate (Hgs), transcript variant X4, mRNA	2.59	4.58	3.98	1.98	2.02	3.16	5.47	3.69	3.1	6.06	1.76	4.82	2.46	5.18	3.55	3.39	4.15	1.84	1.5	6.04
XM_028853569.2	Mafg	MAF bZIP transcription factor G (Mafg), transcript variant X1, mRNA	1.09	1.62	0.28	0.86	1.32	2.94	0.89	0.99	1.87	2.1	2.73	3.9	4.99	7.71	3.15	1.11	2.25	0	0.31	6.58
XM_028853570.2	Mafg	MAF bZIP transcription factor G (Mafg), transcript variant X6, mRNA	0.48	0.19	0	0	0.16	0	0.19	0.43	0.48	0.52	0.31	0.28	0.28	0.87	0	0.88	1	0.18	0	3.65
XM_028853571.2	Mafg	MAF bZIP transcription factor G (Mafg), transcript variant X3, mRNA	0	1.53	0.77	1.05	0.88	0.53	0.48	0.67	0	0.65	0	3.99	0.75	2.41	3.74	1.68	3.42	0.72	0.15	1.49
XM_028853572.1	Mafg	MAF bZIP transcription factor G (Mafg), transcript variant X5, mRNA	0	0.16	0.28	0.16	0.36	0.72	0	0.22	0.23	0.57	0.29	1.93	0.86	0.98	0.16	0	0.19	0.05	0	1.29
XM_028853573.2	Mafg	MAF bZIP transcription factor G (Mafg), transcript variant X4, mRNA	1.93	0.65	1.94	1.55	2.2	0.71	2.23	1.21	0.65	3.79	2.14	7.27	0	4.44	1.31	3.64	1.51	0.69	0.44	9.65
XM_028853574.2	Mafg	MAF bZIP transcription factor G (Mafg), transcript variant X8, mRNA	0	0	0	0	0	0.91	0	0	0	0	0.22	0.11	0	0	0.38	1.01	0.33	0	0	0.1
XM_028853575.1	Mafg	MAF bZIP transcription factor G (Mafg), transcript variant X7, mRNA	0.51	0.21	0	0.79	0.11	1.06	0.24	0.47	0.35	0.66	1.96	3.18	1.63	1.01	1.42	1.14	0.56	0.32	0	3.75
XM_028853576.2	Nptx1	neuronal pentraxin 1 (Nptx1), mRNA	0.03	0.05	0.54	0.01	0.06	0	0.12	0.07	0	0.03	0.01	0.06	0.06	0.06	0.05	0.13	0.03	0.09	0	0.07
XM_028853577.2	Ccdc137	coiled-coil domain containing 137 (Ccdc137), mRNA	7.18	9.27	5.86	7.15	6.54	7.52	10.76	5.98	7.03	14.08	6.06	9.45	4.81	9.35	8.48	8.42	11.89	1.54	0.84	9.66
XM_028853578.2	Oxld1	oxidoreductase like domain containing 1 (Oxld1), transcript variant X1, mRNA	4.38	5.99	3.19	3.67	3.82	4.5	7.05	4.52	4.18	7.7	2.74	1.84	1.7	2.95	3.15	2.64	2.53	1.26	0.27	3.49
XM_028853580.2	Arl16	ADP ribosylation factor like GTPase 16 (Arl16), mRNA	4.45	4.87	4.13	2.93	3.19	5.46	4.34	3.82	4.32	7.98	2.92	2.2	1.35	3.62	4.12	3.5	4.76	2.06	0.28	3.12
XM_028853581.2	Pde6g	phosphodiesterase 6G (Pde6g), mRNA	0.04	0.12	0	0	0	0	0.07	0	0	0	0	0	0	0.05	0	0.06	0	0	0	0
XM_028853582.2	P4hb	prolyl 4-hydroxylase subunit beta (P4hb), mRNA	32.8	48.11	28.73	34.62	39.74	53.27	52.36	33.39	36.43	70.71	42.85	35.93	30.68	68.63	41.97	86.23	114.08	11.03	5.98	60.17
XM_028853583.2	Pcyt2	phosphate cytidylyltransferase 2, ethanolamine (Pcyt2), transcript variant X1, mRNA	0	0	0	0	0	0	0	0	0	0	0	0	0	0	0	0	0	0	0	0
XM_028853584.2	Pcyt2	phosphate cytidylyltransferase 2, ethanolamine (Pcyt2), transcript variant X2, mRNA	0	0	0	0.32	0	0	0	0	0	0	0.06	0.21	0	0.06	0.03	0.18	0.4	0	0.03	0.07
XM_028853585.2	Pcyt2	phosphate cytidylyltransferase 2, ethanolamine (Pcyt2), transcript variant X3, mRNA	0	0	0	0	0	0	0	0	0	0	0	0	0	0	0	0	0	0	0	0
XM_028853586.2	Pcyt2	phosphate cytidylyltransferase 2, ethanolamine (Pcyt2), transcript variant X4, mRNA	0	0	0	0.06	0.21	0	0	0	0	0	0	0	0	0	0.07	0.16	0.22	0	0.1	0.05
XM_028853587.2	Pcyt2	phosphate cytidylyltransferase 2, ethanolamine (Pcyt2), transcript variant X5, mRNA	0.24	0.28	0	0	0	0.05	0	0	0	0	0	0	0.03	0.24	0	0	0	0.03	0.05	0
XM_028853588.2	Pcyt2	phosphate cytidylyltransferase 2, ethanolamine (Pcyt2), transcript variant X6, mRNA	6.43	5.9	2.7	4.64	4.2	3.46	5.33	3.59	5.01	8.94	2.78	1.31	0.29	4.3	2.47	2.29	1.93	0.45	0.4	2.27
XM_028853589.2	Pcyt2	phosphate cytidylyltransferase 2, ethanolamine (Pcyt2), transcript variant X7, mRNA	0.12	0.61	0	0	0	0	0.45	0.11	0.04	1.19	0.11	0	0.16	0.12	0.31	0	0	0.16	0	0.13
XM_028853590.2	Pcyt2	phosphate cytidylyltransferase 2, ethanolamine (Pcyt2), transcript variant X8, mRNA	0.1	0.32	0	0	0	0.25	0	0	0	0	0	0	0.35	0.26	0	0	0	0.09	0.19	0
XM_028853591.2	Pcyt2	phosphate cytidylyltransferase 2, ethanolamine (Pcyt2), transcript variant X9, mRNA	2.62	3.68	2.25	1.4	1.84	2.47	3.9	2.67	0.81	3.61	1.66	0	1.1	2.23	1.86	1.5	1.82	0.35	0.23	2.53
XM_028853592.2	Pcyt2	phosphate cytidylyltransferase 2, ethanolamine (Pcyt2), transcript variant X11, mRNA	0	0	0	0	0	0	0	0	0	0	0	0	0	0	0	0	0	0	0	0.26
XM_028853593.2	Pcyt2	phosphate cytidylyltransferase 2, ethanolamine (Pcyt2), transcript variant X12, mRNA	0.9	1.69	1.02	0.3	0.41	0	0.73	0.84	0.69	1.16	0.51	0.25	1.18	0	0.64	0.31	0.41	0	0.15	0.83
XM_028853594.2	Npb	neuropeptide B (Npb), transcript variant X1, mRNA	0	0.28	0.05	0.08	0.15	0	0.14	0	0	0.15	0.06	0.18	0.06	0	0.2	0	0	0	0	0.1
XM_028853596.2	Faap100	FA core complex associated protein 100 (Faap100), transcript variant X1, mRNA	0.79	1.58	0.64	0.83	0.34	0	0.73	0.51	1.25	1.28	0.5	0.31	0.24	0.78	0.95	0.86	0.83	0.1	0	0.35
XM_028853597.2	Fscn2	fascin actin-bundling protein 2, retinal (Fscn2), mRNA	0	0	0	0.03	0	0	0	0	0.05	0	0	0	0	0	0	0.03	0	0	0	0
XM_028853598.2	Endov	endonuclease V (Endov), transcript variant X2, mRNA	3.21	4.17	1.84	2.66	2.24	2.85	4.1	1.37	2.05	4.36	3.01	6.53	1.67	4.83	4.64	1.55	2.43	0	0.39	7.67
XM_028853600.2	Endov	endonuclease V (Endov), transcript variant X4, mRNA	0.25	0.74	0.38	0	0.42	0.7	0	0.76	1.13	0.71	0.22	0	0.69	0.48	0.24	0.23	0	0.4	0	0.52
XM_028853604.1	Arhgdia	Rho GDP dissociation inhibitor alpha (Arhgdia), transcript variant X1, mRNA	140.55	190.51	109.66	113.98	120.46	160.03	193.64	118.86	135.79	237.88	122.9	121.5	68.33	183.32	130.36	160.24	203.05	37.12	16.45	193.41
XM_028853605.1	Arhgdia	Rho GDP dissociation inhibitor alpha (Arhgdia), transcript variant X2, mRNA	2.04	3.39	2.03	1.33	1.93	3.38	4.23	1.11	2.44	4.94	1.99	0.7	0.49	3.92	1.75	0.75	0.83	0	0.23	4.22
XM_028853607.2	Cep131	centrosomal protein 131 (Cep131), mRNA	1.44	1.72	1.03	1.07	0.89	1.1	1.2	0.8	0.94	2.39	0.72	0.43	0.49	1.18	1.52	0.47	0.47	0.25	0.14	0.75
XM_028853608.2	LOC114680616	nuclear pore complex protein Nup50-like (LOC114680616), mRNA	0	0	0	0	0	0	0	0	0	0	0	0	0	0	0	0	0	0	0	0
XM_028853609.2	Mcrip1	MAPK regulated corepressor interacting protein 1 (Mcrip1), transcript variant X1, mRNA	17	27.13	17.6	13.24	14.21	16.23	21.62	14.62	17.59	26.58	13.99	14.61	12.06	18.84	23.38	21.89	22.23	5.58	3.34	11.44
XM_028853610.2	Mcrip1	MAPK regulated corepressor interacting protein 1 (Mcrip1), transcript variant X2, mRNA	2.03	1.09	0.17	1.06	1.03	1	1.81	0.59	1.53	2.48	0.54	0.58	0	0.64	0	1.89	1.38	0	0.21	0.78
XM_028853611.1	Mcrip1	MAPK regulated corepressor interacting protein 1 (Mcrip1), transcript variant X3, mRNA	0.98	1.46	0.24	0.45	0.21	1.52	1.55	1.12	0.1	0.62	0.26	1.39	0.47	0.61	0.2	0.44	0.33	0	0.17	2.18
XM_028853612.2	Aatk	apoptosis associated tyrosine kinase (Aatk), transcript variant X2, mRNA	0	0	0	0	0	0	0.03	0	0	0	0	0	0	0	0.03	0	0	0	0	0
XM_028853615.1	Baiap2	BAR/IMD domain containing adaptor protein 2 (Baiap2), transcript variant X1, mRNA	0.58	0.37	2.53	1.06	2.17	1.52	0.44	0	0.7	1.57	0.83	0	0.25	1.4	0.49	0.57	0	0.26	0.11	0.2
XM_028853616.1	Baiap2	BAR/IMD domain containing adaptor protein 2 (Baiap2), transcript variant X2, mRNA	1.76	2.82	1.07	1.36	1.12	1.27	1.8	1.27	0.85	2.42	0.61	0.15	0.19	1.02	0.73	0.2	0.59	0.32	0.23	0.24
XM_028853617.2	Baiap2	BAR/IMD domain containing adaptor protein 2 (Baiap2), transcript variant X3, mRNA	1.87	2.67	1.22	1.21	0.84	1.74	2.5	0.75	2.18	2.91	0.64	0.42	0.73	0.5	1.62	1.32	0.42	0	0	0.48
XM_028853618.1	Baiap2	BAR/IMD domain containing adaptor protein 2 (Baiap2), transcript variant X4, mRNA	0.63	1.35	0.36	0	0.37	0	1.53	1.02	0.51	1.17	0	0	0	0	0	0	0.64	0.16	0	0.63
XM_028853619.1	Baiap2	BAR/IMD domain containing adaptor protein 2 (Baiap2), transcript variant X5, mRNA	0	0	0	0	0.46	0.06	0	0	0.38	0.33	0	0.2	0	0	0	0.14	0	0	0	0
XM_028853620.2	Pycr1	pyrroline-5-carboxylate reductase 1 (Pycr1), transcript variant X1, mRNA	0	0.39	0.17	0.21	0.18	0.21	0.36	0	0.29	0.36	0.28	0	0	0.22	0.25	0.38	0	0	0.12	0
XM_028853621.2	Pycr1	pyrroline-5-carboxylate reductase 1 (Pycr1), transcript variant X3, mRNA	0	0.08	0.17	0	0	0.19	0	0	0	0	0	0	0	0	0	0.22	0.17	0	0.16	0
XM_028853623.2	Pycr1	pyrroline-5-carboxylate reductase 1 (Pycr1), transcript variant X2, mRNA	0	0	0	0	0.07	0	0.12	0	0	0	0	0	0	0	0	0	0	0	0	0
XM_028853625.2	Myadml2	myeloid associated differentiation marker like 2 (Myadml2), mRNA	0	0.05	0	0	0.05	0	0	0.06	0.07	0.12	0	0.04	0.1	0.04	0	0	0	0.07	0.04	0
XM_028853626.2	Tepsin	TEPSIN adaptor related protein complex 4 accessory protein (Tepsin), mRNA	4.68	6.2	3.22	3.13	3.36	5.38	5.37	4.36	3.82	8.11	3.54	3.63	2.98	6.49	5.27	2.9	3.58	0.7	0.5	4.09
XM_028853628.2	Alyref	Aly/REF export factor (Alyref), mRNA	24.88	23.77	15.56	17.8	17.58	21.97	29.78	16.99	18.45	32.06	19.47	15.24	9.25	27.07	26.33	39.08	44.17	8.46	3	26.55
XM_028853629.2	Slc25a10	solute carrier family 25 member 10 (Slc25a10), transcript variant X2, mRNA	2.75	4.68	3.5	2.57	2.56	2.28	4.61	1.93	2.47	4.99	2.42	1.25	1	1.67	2.57	2.97	2.06	0.84	0.65	1.71
XM_028853630.2	Chmp6	charged multivesicular body protein 6 (Chmp6), mRNA	14.48	17.94	10.82	10.69	10.6	16.98	21.61	11.81	15.89	22.48	12.46	10.05	6.31	15.57	12.4	16.51	24.49	3.35	1.29	14.28
XM_028853632.2	Anapc11	anaphase promoting complex subunit 11 (Anapc11), transcript variant X1, mRNA	9.72	18.03	18.43	9.98	15.09	19.54	13.17	14.34	18.18	17.14	9.51	9	5.82	8.47	8.09	19.75	27.48	13.37	6.75	7.94
XM_028853633.2	Anapc11	anaphase promoting complex subunit 11 (Anapc11), transcript variant X2, mRNA	23.23	34.86	32.41	22.42	30.3	28.56	22.03	23.88	35.69	32.13	15.95	18.65	15.78	25.09	26.38	25.83	27.86	36.79	12.35	11.19
XM_028853634.2	Efcc1	EF-hand and coiled-coil domain containing 1 (Efcc1), transcript variant X1, mRNA	0.03	0.08	0.06	0.08	0.13	0	0.17	0.01	0.1	0	0.13	0.08	0.14	0.08	0.08	0.05	0.07	0.00524	0.01	0.12
XM_028853635.1	Sirt7	sirtuin 7 (Sirt7), transcript variant X1, mRNA	25.35	29.15	15.49	18.38	17.07	31.73	32.85	23.01	21.61	42.75	23.87	27.73	17.8	39.61	19.82	14.75	15.97	7.04	3.53	44.43
XM_028853638.2	Gcgr	glucagon receptor (Gcgr), transcript variant X2, mRNA	0	0	0	0	0	0	0	0	0	0	0	0	0	0	0	0	0	0	0	0
XM_028853639.2	Gcgr	glucagon receptor (Gcgr), transcript variant X1, mRNA	0	0	0	0	0.14	0	0	0	0	0	0	0	0	0	0	0	0	0	0	0
XM_028853640.2	Gcgr	glucagon receptor (Gcgr), transcript variant X3, mRNA	0	0	0.05	0	0.06	0	0.05	0	0	0	0	0	0	0.03	0.07	0	0	0	0	0
XM_028853643.2	Adgrl3	adhesion G protein-coupled receptor L3 (Adgrl3), transcript variant X23, mRNA	0	0	0	0	0	0	0	0	0	0	0	0	0	0	0	0	0	0	0	0
XM_028853644.2	LOC114680634	carbonyl reductase [NADPH] 2 (LOC114680634), mRNA	0	0.15	0.05	0.57	1.41	0.52	0	0	0	0.14	0.06	0.15	0	0	0.33	0.91	0.17	0	0	0.15
XM_028853645.2	Notum	notum, palmitoleoyl-protein carboxylesterase (Notum), transcript variant X2, mRNA	0	0	0	0	0.03	0	0	0	0	0	0	0.02	0	0	0	0	0.05	0	0	0
XM_028853646.2	Notum	notum, palmitoleoyl-protein carboxylesterase (Notum), transcript variant X1, mRNA	0	0	0	0	0	0	0	0	0	0	0	0	0	0	0	0	0	0	0	0
XM_028853647.2	Tspan10	tetraspanin 10 (Tspan10), mRNA	0.6	0.9	0.93	0.63	1.19	0.46	1.12	1.09	0.72	2.45	0.02	0.04	0.19	0.33	0.08	0.31	0.33	0.05	0	0.44
XM_028853648.2	Aplf	aprataxin and PNKP like factor (Aplf), mRNA	0.28	0.66	0.53	0.46	0.23	0.33	0.27	0.25	0.11	0.59	0.71	0.35	0.26	2.81	0.63	0.5	0.27	0.11	0	0.25
XM_028853649.2	Ndufaf8	NADH:ubiquinone oxidoreductase complex assembly factor 8 (Ndufaf8), transcript variant X1, mRNA	0.86	0.67	1.05	1.76	1.33	0.53	0.38	0.48	0.54	1.48	0.57	0.2	0.37	1.04	0.2	1.05	1.21	0.89	0.67	1.32
XM_028853650.2	Ndufaf8	NADH:ubiquinone oxidoreductase complex assembly factor 8 (Ndufaf8), transcript variant X2, mRNA	5.03	5.56	6.49	3.56	4.02	6.43	5.92	2.86	7.02	7.23	4.19	6.1	2.32	4.9	4.12	8.98	11.31	5.73	2.56	3.28
XM_028853652.1	Mrpl12	mitochondrial ribosomal protein L12 (Mrpl12), mRNA	19.87	22.12	13.07	16.38	17.42	18.59	23.73	16.39	18.38	29.21	13.93	6.44	5.17	15.69	17.06	23.55	33.49	5.7	2.69	7.31
XM_028853653.2	Ppp1r27	protein phosphatase 1 regulatory subunit 27 (Ppp1r27), mRNA	0	0	0	0	0	0	0.05	0	0	0	0	0	0	0	0	0	0	0	0	0
XM_028853655.2	Lrrc45	leucine rich repeat containing 45 (Lrrc45), transcript variant X1, mRNA	12.06	14.05	7.78	10.02	8.72	11.93	15.83	9.11	11.08	22.29	5.48	2.54	2.67	7.41	8.94	2.73	3.68	2.06	0.7	4.17
XM_028853657.1	Lrrc45	leucine rich repeat containing 45 (Lrrc45), transcript variant X2, mRNA	0	0	0	0	0	0.41	0	0.45	0	0.2	0	0	0.17	0.53	0	0	0	0	0	0.22
XM_028853658.2	Dcxr	dicarbonyl and L-xylulose reductase (Dcxr), mRNA	1.28	2.55	2.83	2.21	2.39	2	4.89	2.59	2.32	4.72	2.3	1.39	1.33	1.97	1.05	2.63	1.88	0.94	0.17	1.66
XM_028853659.2	Rac3	Rac family small GTPase 3 (Rac3), transcript variant X1, mRNA	0.49	0.6	0.26	0.16	0.23	0.2	0.44	0.3	0.17	0.39	0.39	0.11	0	0.29	0.41	0.2	0.13	0	0.04	0.27
XM_028853660.2	Rac3	Rac family small GTPase 3 (Rac3), transcript variant X2, mRNA	0.9	4	0.6	0.79	0.4	0.41	1.43	0.8	0.77	1.62	1.3	0.14	0.96	1.28	1.56	0.31	0.44	0.27	0	0
XM_028853661.2	Rac3	Rac family small GTPase 3 (Rac3), transcript variant X3, mRNA	0	0	0	0	0	0	0	0	0	0	0	0	0	0	0	0	0	0	0.27	0.27
XM_028853662.2	Cenpx	centromere protein X (Cenpx), mRNA	46.09	72.96	39.96	46.98	42.6	46.71	69.86	44.2	66.3	82.6	38.8	33.2	26.59	40.81	29.01	43.5	40.74	26.85	11.34	51.9
XM_028853663.2	Aspscr1	ASPSCR1 tether for SLC2A4, UBX domain containing (Aspscr1), mRNA	19.8	23.94	13.98	14.91	13.97	21.33	21.54	16.68	15.98	30.87	13.41	11.09	7.97	18.57	15.12	10.57	11.02	5.16	1.93	14.53
XM_028853666.2	Hmgn3	high mobility group nucleosomal binding domain 3 (Hmgn3), transcript variant X3, mRNA	0.32	0.45	0.36	0.66	0.47	0.95	0.18	0.27	0.13	1.55	0.64	0.27	0.18	0.49	0.39	0.57	0.37	0	0	0
XM_028853667.2	Hmgn3	high mobility group nucleosomal binding domain 3 (Hmgn3), transcript variant X5, mRNA	0.8	0.8	0.66	1.2	0.63	0.62	0.36	0.17	0.59	1.67	0.47	0	0.1	0.12	0.37	0.13	0.38	0.42	0.12	0
XM_028853668.2	Hmgn3	high mobility group nucleosomal binding domain 3 (Hmgn3), transcript variant X6, mRNA	0.25	0.77	0.84	0.06	0.21	0.96	0.68	0.78	0.73	0.91	0	0	0.21	0.13	0.15	0	0.26	0	0.19	0.15
XM_028853669.2	Arhgap25	Rho GTPase activating protein 25 (Arhgap25), mRNA	63.46	61.53	42.64	52.97	49.39	78.56	69.11	64.13	58.84	109.31	76.41	51.38	50.36	95.46	44.67	21.52	27.43	17.04	5.27	88.63
XM_028853672.2	Irak1bp1	interleukin 1 receptor associated kinase 1 binding protein 1 (Irak1bp1), mRNA	0.67	0.46	0.56	0.53	0.64	0.46	0.43	0.49	0.69	0.28	0.22	0.27	0.14	0.44	0.56	0.45	0.26	0.02	0	0.19
XM_028853677.2	Bmp10	bone morphogenetic protein 10 (Bmp10), mRNA	0	0	0	0	0	0	0	0	0	0	0	0	0	0	0	0	0	0	0	0
XM_028853678.2	Pcdh11x	protocadherin 11 X-linked (Pcdh11x), transcript variant X1, mRNA	0	0	0	0	0	0	0	0	0	0	0	0	0	0	0	0	0	0	0	0
XM_028853679.2	Pcdh11x	protocadherin 11 X-linked (Pcdh11x), transcript variant X2, mRNA	0	0	0.05	0	0.00703	0	0	0	0	0.00288	0	0	0	0	0	0	0	0	0	0
XM_028853680.2	Pcdh11x	protocadherin 11 X-linked (Pcdh11x), transcript variant X3, mRNA	0	0	0.06	0	0	0	0	0	0	0	0	0	0	0	0	0	0	0	0	0
XM_028853681.2	LOC114680662	upstream-binding factor 1-like protein 1 (LOC114680662), mRNA	0	0	0	0	0	0	0	0	0	0	0	0	0	0	0	0	0	0	0	0
XM_028853682.2	Macrod1	mono-ADP ribosylhydrolase 1 (Macrod1), mRNA	1.99	1.17	0.47	0.55	1.9	0.55	1.44	1.08	1.22	1.74	0.37	0.25	0.25	0.52	0.49	0.57	0.73	0.68	0.05	0.54
XM_028853683.2	Rtn3	reticulon 3 (Rtn3), transcript variant X1, mRNA	0	0	0	0	0	0	0	0.08	0.14	0.67	0	0.97	0	0.42	0.5	0	0	0	0	0.56
XM_028853684.2	Rtn3	reticulon 3 (Rtn3), transcript variant X3, mRNA	0.28	0.05	0.19	0.11	0.16	0	0.48	0	0	0.12	0.77	0.28	0	0.06	0.12	0.14	0	0	0.01	0.89
XM_028853685.2	Rtn3	reticulon 3 (Rtn3), transcript variant X4, mRNA	0.16	0	0	0	0.04	0	0	0	0	0.05	0.16	0.66	0	0.58	0	0.04	0.27	0	0.34	0.23
XM_028853686.2	Antxr1	ANTXR cell adhesion molecule 1 (Antxr1), mRNA	0.03	0.08	0.08	0.05	0.26	0.18	0.21	0.03	0.07	0.07	0.15	0.15	0.17	0.4	0.08	0.12	0.3	0.02	0	0.12
XM_028853687.2	Rtn3	reticulon 3 (Rtn3), transcript variant X7, mRNA	13.69	22.89	16.74	16.28	21.52	32.51	22.35	19.33	17.44	40.61	37.77	59.67	28.81	57.34	30.69	32.91	36.68	10.78	4.79	76.31
XM_028853688.2	Zfta	chromosome 1 C11orf95 homolog (C1H11orf95), mRNA	1.65	2.15	2.01	0.91	1.66	0.77	2.44	0.88	0.93	1.81	0.7	0.35	0.52	1.32	4.19	0.46	0.45	0.35	0.34	0.37
XM_028853689.2	Atl3	atlastin GTPase 3 (Atl3), transcript variant X1, mRNA	3.91	9.39	3.77	3.89	2.58	3.44	4.39	1.1	5.12	7.25	1.69	2.88	2.38	4.46	3.55	2.17	3.96	0.32	0.28	1.62
XM_028853690.2	Spindoc	spindlin interactor and repressor of chromatin binding (Spindoc), transcript variant X1, mRNA	4.76	6.56	3.97	3.66	4.06	5.61	6.43	3.99	4.87	8.28	4.01	3.69	3.15	6.16	5.33	5.51	3.88	1.3	0.62	6.07
XM_028853691.2	Spindoc	spindlin interactor and repressor of chromatin binding (Spindoc), transcript variant X2, mRNA	1.23	1.16	0.58	0.54	0.57	0.48	1.48	0.82	0.26	1.06	0.75	0.62	0.23	0.97	0.57	0.43	0.94	0	0	0.67
XM_028853692.2	Sf1	splicing factor 1 (Sf1), transcript variant X1, mRNA	5.67	10.96	4.68	9.89	4.47	10.36	9.32	1.95	8.64	13.17	2.55	5.41	2.88	11.21	12.1	8.68	0.59	0.28	0.13	10.64
XM_028853693.2	Sf1	splicing factor 1 (Sf1), transcript variant X2, mRNA	8.02	11.36	9.99	7.29	8.91	9.51	18.46	10.58	7.09	18.67	12.22	16.16	11.79	19.5	8.39	9.27	17.13	3.53	2.04	26.22
XM_028853694.2	Sf1	splicing factor 1 (Sf1), transcript variant X3, mRNA	0	1.49	0	0	1.65	5.62	0	1.53	4.05	1.5	3.1	0	0.82	2.55	0	0	1.59	0	0.3	1.94
XM_028853695.2	Sf1	splicing factor 1 (Sf1), transcript variant X4, mRNA	1.77	2.4	1.06	0	0	0.52	2.28	0	3.34	4.72	2.21	2.06	1.86	2.35	0.17	0	4.01	0	0.65	3.24
XM_028853696.2	Sf1	splicing factor 1 (Sf1), transcript variant X5, mRNA	3.38	10.09	4.48	5.41	4.94	4.17	8.37	4.36	2.17	13.94	1.64	9.31	5.74	11.41	10.79	9.81	9.89	3.15	0	10.3
XM_028853697.2	Sf1	splicing factor 1 (Sf1), transcript variant X6, mRNA	2.47	0.1	2.35	2.99	3.09	3.85	3.54	1.85	0	1.84	3.2	3.69	1.28	3.53	3.05	3.16	1.87	1.26	0.2	2.35
XM_028853698.2	Gfpt1	glutamine--fructose-6-phosphate transaminase 1 (Gfpt1), transcript variant X1, mRNA	6.71	10.76	6.53	5.59	7.55	7.21	6.88	4.27	6.06	11.68	5.5	7.24	5.19	10.69	8.93	12.95	14.08	1.13	0.71	9.53
XM_028853699.2	Sf1	splicing factor 1 (Sf1), transcript variant X7, mRNA	25.27	26.6	14.4	11.55	20.09	17.51	18.23	12.21	18.96	22.2	20.72	17.64	17.32	29.48	24.25	21.72	29.15	6.63	3	26.53
XM_028853700.2	Sf1	splicing factor 1 (Sf1), transcript variant X8, mRNA	2.43	0	0.75	0.38	0.18	1.97	0.13	1.34	0.67	4.92	0.64	0.85	0.69	1.83	0	0.08	0	0.02	0.21	0
XM_028853701.2	Sf1	splicing factor 1 (Sf1), transcript variant X9, mRNA	0.68	0	0.32	1.82	0.05	0.91	2	1.09	0	1.05	0.79	0.87	0.41	1.1	1.07	0.19	0.23	0.08	0.15	0.64
XM_028853702.2	Sf1	splicing factor 1 (Sf1), transcript variant X11, mRNA	0	0.42	0	0	0	0	0	0	0	0.34	0	0	0	0	0.38	0	0.18	1.52	0	0
XM_028853703.2	Plcb3	phospholipase C beta 3 (Plcb3), mRNA	2.2	3.84	2.24	3.64	4.05	5.08	3.95	3.46	3.38	7.78	4.46	5.28	3.85	7.95	5.07	3.85	4.26	0.89	0.53	6.59
XM_028853706.2	Bad	BCL2 associated agonist of cell death (Bad), transcript variant X1, mRNA	2.16	1.96	2.21	1.37	2.48	2.98	3.99	1.82	2.9	4.15	2.59	1.52	2.69	3.99	2.27	1.45	1.63	1.06	0.27	2.54
XM_028853707.2	Bad	BCL2 associated agonist of cell death (Bad), transcript variant X2, mRNA	9.87	10.68	6.64	8.15	9.55	13.62	11.5	10.03	9.66	14.37	10.49	9.64	4.48	14.41	9.19	8.13	9.54	3.47	1.75	11.27
XM_028853708.2	Gfpt1	glutamine--fructose-6-phosphate transaminase 1 (Gfpt1), transcript variant X2, mRNA	0	0	0.62	0	0	0	0	0	0	0	0	0.22	0	0.17	0	0	0	0	0	0
XM_028853709.2	Esrra	estrogen related receptor alpha (Esrra), mRNA	7.71	10.61	6.98	5.04	7.72	9.6	9.59	8.2	7.86	13.4	7.74	11.41	6.16	13.84	9.83	6.28	12.09	2.25	1.04	13.84
XM_028853710.2	Prdx5	peroxiredoxin 5 (Prdx5), mRNA	41.41	38.94	26.9	30.02	36.27	78.37	47.09	41.45	34.08	68.22	133.48	376	120.13	257.98	172.61	75.78	115.28	57.53	20.88	372.29
XM_028853711.1	Trmt112	tRNA methyltransferase subunit 11-2 (Trmt112), mRNA	33.28	39.62	26.34	21.26	23.01	25.89	37.07	19.78	29.72	46.63	20.77	13.49	11.01	30.18	22.88	27.98	40.86	9.79	3.24	13.77
XM_028853712.2	Plaat3	phospholipase A and acyltransferase 3 (LOC114680680), transcript variant X1, mRNA	12.93	10.98	8.63	7.79	6.37	7.67	10.36	4.77	4.42	9.59	7.72	8.71	5.72	12.11	10.86	1.49	2.59	9.66	3.03	3.1
XM_028853713.2	Plaat3	phospholipase A and acyltransferase 3 (LOC114680680), transcript variant X2, mRNA	47.36	47.26	37.35	33.69	33.77	43.7	48.06	32.51	35.32	49.3	40.39	26.05	27.46	24.8	47.9	25.87	23.76	56.49	32.12	9.99
XM_028853715.2	Plaat3	phospholipase A and acyltransferase 3 (LOC114680680), transcript variant X3, mRNA	23.63	28.45	12.5	15.15	12.84	21.06	12.65	17.01	15.3	21.25	11.11	6.09	5.84	13.75	12.87	5.32	6.12	7.7	4.72	6.96
XM_028853717.2	Stip1	stress induced phosphoprotein 1 (Stip1), mRNA	26.39	33.24	17.5	19.11	22.89	21.51	30.47	15.59	21.49	33.42	21.62	21.57	15.71	29.67	29.89	28.47	41.67	12.17	4.14	19.79
XM_028853718.2	Pygm	glycogen phosphorylase, muscle associated (Pygm), mRNA	6.87	13.44	6.22	2.6	5.28	2.07	8.73	3.14	3.08	14.78	3.19	1.49	2.18	4.19	3.49	1.04	0.86	1.14	0.44	0.7
XM_028853720.2	Nfu1	NFU1 iron-sulfur cluster scaffold (Nfu1), transcript variant X1, mRNA	5.04	8.13	5.46	4.89	5.73	9.83	8.97	5.2	6.83	10.03	7.71	5.13	2.14	11.04	5.47	20.56	26.01	1.04	0.62	10.82
XM_028853721.2	Map4k2	mitogen-activated protein kinase kinase kinase kinase 2 (Map4k2), transcript variant X1, mRNA	32.6	39.44	21.18	23.88	24.96	40.64	32.11	29.32	31.08	49.44	26.92	28.34	20.75	52.91	32.55	6.06	8.5	5.82	1.96	50.85
XM_028853722.2	Fermt3	fermitin family member 3 (Fermt3), transcript variant X1, mRNA	78.8	107.19	51.03	78.08	65.3	112.94	144.7	90.92	145.58	139.08	72.04	92.15	74.44	122.02	40.13	102.93	32.5	32.55	31.53	140.89
XM_028853723.2	Fermt3	fermitin family member 3 (Fermt3), transcript variant X2, mRNA	68.41	92.24	43.77	72.51	58.39	93.81	122.26	76	117.73	120.03	50.64	73.01	58.79	97.94	28.79	65.41	26.4	27.6	28.28	121.11
XM_028853725.2	Nudt22	nudix hydrolase 22 (Nudt22), transcript variant X1, mRNA	12.09	15.48	8.64	8.39	9.03	12.13	15.3	8.1	10.08	18.91	8.29	5.76	4.62	13.11	11.09	8.93	9.54	2.49	1.04	6.93
XM_028853726.2	Nudt22	nudix hydrolase 22 (Nudt22), transcript variant X2, mRNA	0.3	0.11	0.27	1.02	0.68	0.12	0.2	0.52	0	0.81	0	0.06	0.11	0.43	0.43	0.13	0.05	0.36	0.19	0.26
XM_028853729.2	Nfu1	NFU1 iron-sulfur cluster scaffold (Nfu1), transcript variant X2, mRNA	0	0.11	0	0	0.25	0.87	0.5	0.42	0	0.99	0.23	0	0	0.16	0.12	0	0.47	0	0	0.06
XM_028853733.2	Otub1	OTU deubiquitinase, ubiquitin aldehyde binding 1 (Otub1), mRNA	21.47	31.67	21.2	18.41	18.41	27.45	30.15	18.19	19.95	40.01	24.07	25.27	11.84	33.91	24.61	25.04	28.88	6.91	3.06	27.56
XM_028853734.2	Men1	menin 1 (Men1), transcript variant X1, mRNA	15.17	10.09	7.64	6.95	5.64	4.96	8.13	1.83	9.09	10.2	9.12	6.86	9.69	15.38	11.96	2.82	6.81	3.13	2.21	11.12
XM_028853735.2	Men1	menin 1 (Men1), transcript variant X2, mRNA	6.71	11.96	6.32	7.36	7.71	14.62	15.71	13.21	7.39	18.39	8.48	10.79	3.03	15.58	7.54	5.91	4.16	2.78	0.13	17.81
XM_028853736.2	Vegfb	vascular endothelial growth factor B (Vegfb), transcript variant X1, mRNA	0.12	0.4	0.59	0	0.74	0	0.92	0	0.34	0.56	0.37	0	0.17	0.33	0	0.71	0.05	0.57	0.05	0
XM_028853737.2	Vegfb	vascular endothelial growth factor B (Vegfb), transcript variant X2, mRNA	0.18	0	0.32	0.17	1.81	0.35	0.29	0.33	0	0.66	0	0.1	0	0	0.07	0.33	0	0	0	0.16
XM_028853738.2	Nfu1	NFU1 iron-sulfur cluster scaffold (Nfu1), transcript variant X3, mRNA	1.14	0.55	0.34	0.37	0.51	0	0.23	0.2	0	1.03	0.45	0	0.58	0.41	0.33	0.61	0.17	0	0.28	0.4
XM_028853739.2	Ppp1r14b	protein phosphatase 1 regulatory inhibitor subunit 14B (Ppp1r14b), mRNA	17.4	20.73	9.13	14.42	13.36	13.35	22.71	12.98	15.85	28.5	19.25	9.86	6.9	16.73	20.28	38.04	61.37	6.18	3.05	11.57
XM_028853740.1	Fkbp2	FKBP prolyl isomerase 2 (Fkbp2), transcript variant X2, mRNA	9.51	13.8	8.9	10.59	11.54	14.75	16.67	10.81	9.96	19.18	11.8	3.21	5.04	16.18	8.2	18.27	23.46	4.58	1.39	11.01
XM_028853741.1	Fkbp2	FKBP prolyl isomerase 2 (Fkbp2), transcript variant X3, mRNA	2.37	1.48	1.01	0.54	0.71	0.56	2.08	3.13	0.45	2.31	1.28	0.04	0	2.02	1.06	1.17	1.54	0.53	0	0.21
XM_028853742.2	Rps6ka4	ribosomal protein S6 kinase A4 (Rps6ka4), transcript variant X1, mRNA	8.02	11.8	5.75	5.89	7.51	8.03	11.42	6.2	4.72	14.37	4.87	3.19	2.62	6.19	5.38	3.61	5.1	1.57	0	5.65
XM_028853743.2	Rps6ka4	ribosomal protein S6 kinase A4 (Rps6ka4), transcript variant X2, mRNA	0.4	0	0	1.72	0.65	1.31	0.57	0.92	3.98	2.16	0	0.31	0.67	0	0	2.36	2.06	0	0.86	0.51
XM_028853745.2	Rasgrp2	RAS guanyl releasing protein 2 (Rasgrp2), transcript variant X2, mRNA	39.44	43.07	19.99	20.4	25.16	36.08	47.35	29.11	36.69	45.83	14.98	10.36	15.58	22.79	9.66	14.41	5.31	3.44	3.83	18.99
XM_028853746.2	Rasgrp2	RAS guanyl releasing protein 2 (Rasgrp2), transcript variant X1, mRNA	6.08	15.83	9.72	14.09	8.62	14.8	22.05	10.03	16.53	25.27	10.62	9.78	13.32	16.65	6.5	1.84	2.12	3.43	3.35	8.43
XM_028853747.2	Rasgrp2	RAS guanyl releasing protein 2 (Rasgrp2), transcript variant X4, mRNA	33.85	35.49	14.37	23.97	16.56	25.21	39.99	23.48	30.52	42.69	17.14	9.69	20	25.11	14.07	4.73	1.9	5.94	2.61	15.94
XM_028853748.2	Rasgrp2	RAS guanyl releasing protein 2 (Rasgrp2), transcript variant X3, mRNA	8.76	11.36	8.86	13.75	10.33	13	14.92	13.51	31.98	12.85	4.98	4.35	8.07	6.48	3.81	9.16	4.02	5.16	2.09	12.63
XM_028853749.2	Kcnk4	potassium two pore domain channel subfamily K member 4 (Kcnk4), mRNA	0	0.03	0.02	0	0	0	0	0	0	0	0.02	0	0	0	0.03	0	0	0	0	0
XM_028853751.1	Aak1	AP2 associated kinase 1 (Aak1), transcript variant X4, mRNA	0	1.04	0.49	0.04	0.78	0.82	0.56	0.42	0.4	0.92	0.21	0.07	0.07	0.34	0	0.03	0.31	0	0	0.36
XM_028853752.2	Catsperz	catsper channel auxiliary subunit zeta (Catsperz), mRNA	0.04	0.03	0	0	0	0	0	0	0	0	0	0.05	0	0.17	0	0	0.03	0	0	0
XM_028853753.2	Plaat5	phospholipase A and acyltransferase 5 (Plaat5), transcript variant X1, mRNA	0	0.14	0.23	0.27	0.14	0	0.13	0.22	0.46	0.32	0.18	0	0.25	0.27	0.12	0	0	0	0.03	0.19
XM_028853754.2	LOC114680701	solute carrier family 22 member 19-like (LOC114680701), mRNA	0	0	0	0	0	0	0	0	0	0	0	0	0	0	0	0	0	0	0	0
XM_028853755.2	LOC114680703	cytochrome c oxidase subunit 8A, mitochondrial (LOC114680703), mRNA	63.99	94.76	64.39	65.58	77.22	108.68	108.08	82.39	99.28	144.31	80.21	69.75	42.66	76	68.77	99.26	111.2	48.61	22.6	121.43
XM_028853756.2	Ccdc88b	coiled-coil domain containing 88B (Ccdc88b), mRNA	11.26	15.11	7.71	9.84	8.4	15.12	14.7	10.09	11.69	23.66	23.86	44.06	21.6	37.98	19.74	11.64	10.36	8.23	2.81	60.2
XM_028853760.2	Dnajc4	DnaJ heat shock protein family (Hsp40) member C4 (Dnajc4), transcript variant X1, mRNA	4.44	4	1.65	2.99	2.78	4.16	5.07	3.94	2.35	7.28	1.76	1.38	1.16	3.87	0.87	3.49	2.09	1.24	0	2.37
XM_028853761.2	Dnajc4	DnaJ heat shock protein family (Hsp40) member C4 (Dnajc4), transcript variant X2, mRNA	0.23	0.66	1.91	1.42	0.33	0.73	0.82	0.74	1.18	1.02	0.37	0.16	0.27	0.33	0.47	0.51	1.13	0	0	1.6
XM_028853762.2	Nrxn2	neurexin 2 (Nrxn2), transcript variant X1, mRNA	0	0	0	0	0	0	0	0	0	0	0	0	0	0	0	0	0	0	0	0
XM_028853763.2	Nrxn2	neurexin 2 (Nrxn2), transcript variant X2, mRNA	0	0	0	0	0	0	0	0	0	0	0	0	0	0	0	0	0	0	0	0
XM_028853764.2	Nrxn2	neurexin 2 (Nrxn2), transcript variant X3, mRNA	0	0	0	0	0	0	0	0	0	0	0	0	0	0	0	0	0	0	0	0
XM_028853765.2	Nrxn2	neurexin 2 (Nrxn2), transcript variant X4, mRNA	0	0	0	0	0	0	0	0	0	0	0	0	0	0	0	0	0	0	0	0
XM_028853766.2	Nrxn2	neurexin 2 (Nrxn2), transcript variant X5, mRNA	0	0	0	0	0	0	0	0	0	0	0	0	0	0	0	0	0	0	0	0
XM_028853767.2	Nrxn2	neurexin 2 (Nrxn2), transcript variant X6, mRNA	0.00655	0.00927	0	0	0	0.02	0.04	0	0.05	0.03	0	0	0	0	0	0	0	0	0	0.00772
XM_028853768.2	Nrxn2	neurexin 2 (Nrxn2), transcript variant X7, mRNA	0	0	0	0	0	0.02	0	0	0	0	0	0.00762	0	0.00836	0	0	0	0	0	0
XM_028853769.1	Aak1	AP2 associated kinase 1 (Aak1), transcript variant X5, mRNA	0	0	0	0	0	0	0	0	0	0	0	0	0	0	0	0	0	0	0	0
XM_028853770.2	Nrxn2	neurexin 2 (Nrxn2), transcript variant X8, mRNA	0	0	0	0	0	0	0	0	0	0	0	0	0	0	0	0	0	0	0	0
XM_028853771.2	Nrxn2	neurexin 2 (Nrxn2), transcript variant X9, mRNA	0.23	0.38	0.04	0.23	0	0	0	0.09	0.18	0	0.09	0	0.01	0	0	0.00891	0	0	0	0.05
XM_028853772.2	Nrxn2	neurexin 2 (Nrxn2), transcript variant X10, mRNA	0	0	0.08	0	0	0.01	0.26	0.1	0.08	0	0	0	0.02	0	0	0.00892	0	0	0.02	0.12
XM_028853773.2	Nrxn2	neurexin 2 (Nrxn2), transcript variant X11, mRNA	0	0	0	0	0	0	0	0	0	0	0	0	0	0	0	0	0	0	0	0
XM_028853774.2	Nrxn2	neurexin 2 (Nrxn2), transcript variant X12, mRNA	0	0	0	0	0	0	0	0	0	0	0	0	0	0	0	0	0	0	0	0
XM_028853775.2	Nrxn2	neurexin 2 (Nrxn2), transcript variant X13, mRNA	0.01	0.00937	0.02	0.02	0	0	0.01	0.01	0	0	0	0	0	0	0	0	0	0	0	0
XM_028853776.2	Nrxn2	neurexin 2 (Nrxn2), transcript variant X14, mRNA	0.24	0.34	0.16	0.21	0.29	0.18	0.2	0.17	0.28	0.32	0.09	0.07	0	0.13	0.15	0.05	0.03	0.00985	0	0.06
XM_028853777.2	Nrxn2	neurexin 2 (Nrxn2), transcript variant X15, mRNA	0	0	0	0	0	0	0	0	0	0	0	0	0	0	0	0	0	0	0	0
XM_028853778.2	Nrxn2	neurexin 2 (Nrxn2), transcript variant X17, mRNA	0	0	0	0	0	0	0	0	0	0	0	0	0	0	0	0	0	0	0	0
XM_028853779.2	Nrxn2	neurexin 2 (Nrxn2), transcript variant X19, mRNA	0	0	0	0	0.28	0.19	0	0	0	0.17	0	0.08	0	0.16	0.03	0	0.08	0	0	0
XM_028853781.2	Nrxn2	neurexin 2 (Nrxn2), transcript variant X25, mRNA	0	0	0	0	0	0	0	0	0	0	0	0	0	0	0	0	0	0	0	0
XM_028853782.2	Nrxn2	neurexin 2 (Nrxn2), transcript variant X26, mRNA	0	0	0	0	0	0	0.04	0	0	0	0.07	0	0.03	0	0	0	0	0	0.02	0
XM_028853783.2	Nrxn2	neurexin 2 (Nrxn2), transcript variant X27, mRNA	0	0	0	0	0	0	0	0	0	0	0	0	0	0	0	0	0	0	0	0
XM_028853784.2	Nrxn2	neurexin 2 (Nrxn2), transcript variant X28, mRNA	0	0	0	0	0	0	0	0	0	0	0	0	0	0	0	0	0	0	0	0
XM_028853786.2	Lgals12	galectin 12 (Lgals12), transcript variant X4, mRNA	0	0	0	0	0.43	0	0	0	0	0.23	0	0	0	0	0	0	0	0	0	0
XM_028853793.2	Mark2	microtubule affinity regulating kinase 2 (Mark2), transcript variant X1, mRNA	0	0	0	0	0.64	3.7	0	0	0	0	0.64	0	1.85	1.06	0.3	1.06	2.87	0	0.36	0
XM_028853794.2	Mark2	microtubule affinity regulating kinase 2 (Mark2), transcript variant X2, mRNA	0	0	0	0	0	0	0	0	0	0	0	0	0	0	0	0	0	0	0	0.04
XM_028853795.2	Mark2	microtubule affinity regulating kinase 2 (Mark2), transcript variant X7, mRNA	5.24	9.34	2.94	5.68	3.14	3.72	6.71	6.56	7.35	10.3	7.12	9.49	4.19	18.46	5.07	2.06	0.31	0.74	1.8	14.1
XM_028853796.2	Mark2	microtubule affinity regulating kinase 2 (Mark2), transcript variant X8, mRNA	0	0	0	0	0	0	0	0	0.59	0.12	0	0.17	0	0.38	0	0	0	0	0	0
XM_028853797.2	Mark2	microtubule affinity regulating kinase 2 (Mark2), transcript variant X9, mRNA	15.12	17.45	10.31	11.75	13.19	16.37	16.77	10.68	11.76	27.39	16.36	19.75	13.74	25.59	16.01	10.84	13.35	4.1	1.22	29.42
XM_028853798.2	Rcor2	REST corepressor 2 (Rcor2), mRNA	0.22	0.27	0.22	0.16	0.38	0.17	0.43	0.3	0.23	0.39	0.33	0.04	0.07	0.16	1.82	0.16	0.04	0.05	0.08	0.18
XM_028853799.2	LOC114680710	solute carrier family 22 member 19-like (LOC114680710), transcript variant X1, mRNA	0	0	0	0	0	0	0	0	0	0	0	0	0	0	0	0	0	0	0	0
XM_028853800.1	Aak1	AP2 associated kinase 1 (Aak1), transcript variant X10, mRNA	0	0.19	0.51	0.13	0.31	0.23	0.51	0.32	0.45	1.14	0.12	0.06	0	0.46	0	0.03	0.25	0.16	0.02	0.16
XM_028853801.2	LOC114680711	RAS guanyl-releasing protein 2-like (LOC114680711), transcript variant X3, mRNA	6.61	12.44	4.67	5.2	5.1	4.51	8.47	5.42	9.48	11.85	6.47	3.53	6.38	10.59	9.61	0.84	1.19	1.18	0.46	4.97
XM_028853802.2	LOC114680711	RAS guanyl-releasing protein 2-like (LOC114680711), transcript variant X1, mRNA	14.55	17.52	7.78	4.43	6.7	9.13	13.66	3.95	9.03	16.85	5.32	4.36	3.69	4.73	1.3	3.65	1.67	0.07	1.14	1.37
XM_028853803.2	LOC114680711	RAS guanyl-releasing protein 2-like (LOC114680711), transcript variant X4, mRNA	3.34	5.38	3.31	2.19	3.71	4.94	6.49	2.77	3.78	7.12	2.33	2.27	3.44	6.12	2.57	0.62	0.82	0.51	0.2	1.49
XM_028853804.2	LOC114680711	RAS guanyl-releasing protein 2-like (LOC114680711), transcript variant X5, mRNA	0	0	0.29	0	0	0.15	0.58	0	0.81	0.22	0	0	0	0	0	0	0.13	0.21	0	0
XM_028853805.2	Slc22a12	solute carrier family 22 member 12 (Slc22a12), mRNA	0	0.04	0	0	0	0	0.02	0.04	0	0	0.03	0	0.03	0	0	0	0	0.03	0	0
XM_028853807.2	LOC114680714	uncharacterized LOC114680714 (LOC114680714), mRNA	0.26	5.23	0.64	2.22	0.13	0.31	1.54	0.05	0.46	1.03	0.74	0.53	0.94	0.67	0.36	0.08	0.05	0	0.03	0.77
XM_028853808.1	Aak1	AP2 associated kinase 1 (Aak1), transcript variant X11, mRNA	0	0	0	0	0	0	0	0	0	0	0	0	0	0	0	0	0	0	0	0
XM_028853809.2	Fam107a	family with sequence similarity 107 member A (Fam107a), transcript variant X1, mRNA	0	0	0	0	0	0	0	0	0	0	0	0	0	0	0	0	0	0	0	0
XM_028853810.2	Fam107a	family with sequence similarity 107 member A (Fam107a), transcript variant X2, mRNA	0.14	0.41	0.23	0.14	0.88	0.64	0.27	0.05	0.17	0.31	0.72	0.33	0.29	0.14	0.57	0.37	0.58	0.16	0	0.13
XM_028853811.2	Fam107a	family with sequence similarity 107 member A (Fam107a), transcript variant X3, mRNA	0	0	0.45	0	0.31	0	0.11	0	0	0	0	0.01	0	0	0.32	0	0	0	0	0
XM_028853812.2	Fam3d	FAM3 metabolism regulating signaling molecule D (Fam3d), transcript variant X1, mRNA	0.1	0	0	0.33	0	0	0	0	0.27	0.23	0	0	0	0	0	0	0	0	0	0
XM_028853813.2	Adgrl3	adhesion G protein-coupled receptor L3 (Adgrl3), transcript variant X24, mRNA	0	0	0	0	0	0	0	0	0	0	0	0	0	0	0	0	0	0	0	0
XM_028853814.2	Abhd6	abhydrolase domain containing 6, acylglycerol lipase (Abhd6), transcript variant X3, mRNA	1.5	2.98	1.6	1.86	1.72	2.43	2.68	0.88	0	2.84	0.86	0.2	0.54	1.4	1.34	0	0.53	0	0	0.61
XM_028853815.2	Abhd6	abhydrolase domain containing 6, acylglycerol lipase (Abhd6), transcript variant X4, mRNA	0	0.36	0	0.08	0.26	0.1	0	0	0	0.09	0	0	0.09	0	0.1	0	0	0	0	0
XM_028853817.2	Abhd6	abhydrolase domain containing 6, acylglycerol lipase (Abhd6), transcript variant X5, mRNA	0	0.44	0.5	0.21	0.17	0.16	0.12	0.39	0.78	0.76	0	0.08	0	0.2	0.52	0.55	0	0	0	0
XM_028853818.2	Abhd6	abhydrolase domain containing 6, acylglycerol lipase (Abhd6), transcript variant X7, mRNA	0	0.12	0	0.07	0	0.18	0.05	0	0	0	0	0	0	0	0	0	0	0	0.17	0
XM_028853819.2	Flnb	filamin B (Flnb), transcript variant X1, mRNA	0	0.02	0	0	0.96	0.19	0	0.36	0.76	0	0.12	0.44	0.3	0	0	0.8	0.55	0	0	0.48
XM_028853820.2	Flnb	filamin B (Flnb), transcript variant X3, mRNA	6.8	12.95	5.18	7.27	6.19	6.53	8.47	3.2	6.5	15.43	2.97	1.56	2.13	3.57	3.02	4.54	6.88	0.61	0.41	0.93
XM_028853821.2	Flnb	filamin B (Flnb), transcript variant X5, mRNA	0.00622	0.46	0.31	0.07	0.08	0.06	0.05	0	0.29	0.28	0	0	0.04	0.1	0.15	0	0	0	0	0.16
XM_028853822.2	Kctd6	potassium channel tetramerization domain containing 6 (Kctd6), transcript variant X1, mRNA	0	0	0	0	0.08	0	0	0	0	0	0.13	0.07	0	0	0	0	0.12	0	0	0
XM_028853823.2	Kctd6	potassium channel tetramerization domain containing 6 (Kctd6), transcript variant X3, mRNA	0.59	0.77	0.16	0.68	0	0.44	0.11	0.45	0	0.37	0.8	0	0.17	0.43	0.1	0.43	0	0	0.06	0
XM_028853825.2	Aak1	AP2 associated kinase 1 (Aak1), transcript variant X16, mRNA	0.27	0.99	0.42	0.1	0.4	0.27	0.2	0.06	0.24	0.27	0.07	0.2	0.35	0.2	0.21	0.04	0.05	0	0	0.33
XM_028853827.2	Kctd6	potassium channel tetramerization domain containing 6 (Kctd6), transcript variant X5, mRNA	1.3	0.24	1.01	0.15	0.14	0	0.54	0.21	0.39	0.92	0	0.14	0.05	0.09	0.17	0.37	0.25	0	0	0.06
XM_028853828.2	Kctd6	potassium channel tetramerization domain containing 6 (Kctd6), transcript variant X6, mRNA	0.58	0.93	0.36	0.23	1.55	0.43	0.86	0.49	1.25	0	0	0.23	0.45	0.72	1.16	0	0.73	0.31	0.03	0.43
XM_028853830.2	Acox2	acyl-CoA oxidase 2 (Acox2), transcript variant X1, mRNA	0	0	0	0	0	0	0	0	0	0	0	0	0	0	0	0.02	0.02	0.13	0	0
XM_028853831.2	Acox2	acyl-CoA oxidase 2 (Acox2), transcript variant X2, mRNA	0	0	0	0	0	0	0	0	0	0	0	0	0	0	0	0	0	0	0	0
XM_028853832.2	Acox2	acyl-CoA oxidase 2 (Acox2), transcript variant X3, mRNA	0.04	0.03	0.11	0	0.47	0.06	0.14	0.03	0.04	0.12	0.02	0.15	0	0	0.11	0	0	0	0	0.02
XM_028853833.2	LOC114680725	ras-related protein Ral-B (LOC114680725), mRNA	3.5	0.34	3.25	1.3	2.18	5.56	3.64	2.65	0.08	8.33	0.51	7.28	0.42	9.39	3.19	4.33	5.26	1.62	0.05	12.97
XM_028853834.2	Aak1	AP2 associated kinase 1 (Aak1), transcript variant X17, mRNA	0	0	0	0	0	0	0	0	0	0	0	0	0	0	0	0	0	0	0	0
XM_028853835.2	LOC114680726	fibrillin-1-like (LOC114680726), mRNA	0	0	0	0	0	0	0	0	0	0	0	0	0	0	0	0	0	0	0	0
XM_028853836.2	Htd2	hydroxyacyl-thioester dehydratase type 2 (Htd2), mRNA	9.33	12.73	7.45	6.85	6.97	9.62	8.72	5.65	5.17	11.42	5.66	4.95	3.22	7.91	5.08	5.57	9.19	1.48	0.95	4.52
XM_028853837.2	Rpp14	ribonuclease P/MRP subunit p14 (Rpp14), mRNA	2.32	4.16	1.67	1.36	1.86	1.79	2.47	1.36	2.42	2.98	0.97	1.4	0.96	2.27	2.3	1.31	2.63	0.43	0.2	2.07
XM_028853838.1	Pxk	PX domain containing serine/threonine kinase like (Pxk), transcript variant X1, mRNA	9.11	15.41	6.53	8.68	7.57	7.4	11.15	7.2	9.95	14.33	5.86	5.63	4.71	10.75	8.41	5.89	11.48	1.43	0.89	5.58
XM_028853839.1	Pxk	PX domain containing serine/threonine kinase like (Pxk), transcript variant X2, mRNA	8.89	6.83	4.68	2.09	5.39	7.92	6.09	5.31	4.99	12.54	3.03	3.23	1.17	5.39	2.13	2.88	6.09	1.35	0.66	4.42
XM_028853840.1	Pxk	PX domain containing serine/threonine kinase like (Pxk), transcript variant X7, mRNA	0.25	0	0.25	0.3	0.46	0	0	0	0	0	0	0	0	0	0	0	0	0	0	0
XM_028853842.1	Pxk	PX domain containing serine/threonine kinase like (Pxk), transcript variant X8, mRNA	0	0	0	0	0	0.35	0.21	0	0	0	0	0	0	0	0	0	0	0	0	0.67
XM_028853843.2	Aak1	AP2 associated kinase 1 (Aak1), transcript variant X18, mRNA	0.31	0.12	0.36	0.19	0.14	0.06	0.14	0.06	0.21	0.39	0.06	0.11	0	0.37	0.28	0.05	0.05	0.1	0.06	0.11
XM_028853844.2	Pdhb	pyruvate dehydrogenase E1 subunit beta (Pdhb), mRNA	24.26	30.15	19.49	18.17	23.91	23.6	24.13	17.29	19.67	31.11	13.79	12.6	9.02	22.82	20.32	18.06	29.49	5.79	3.76	13.69
XM_028853845.2	Cfap20dc	CFAP20 domain containing (Cfap20dc), transcript variant X1, mRNA	0.37	0.15	0.18	0	0.46	0.15	0	0.39	0.22	0	0	0	0.26	0	0.84	0.57	0	0	0	0
XM_028853846.2	Cfap20dc	CFAP20 domain containing (Cfap20dc), transcript variant X2, mRNA	0.51	0.6	0	0.9	0	0.43	0.42	0	0	1.28	0.2	0	0	0.23	0	0	0	0	0	0
XM_028853847.2	Cfap20dc	CFAP20 domain containing (Cfap20dc), transcript variant X3, mRNA	0	0	0	0	0	0	0.28	0	0	0	0	0	0	0	0	0	0	0	0	0
XM_028853850.2	Cfap20dc	CFAP20 domain containing (Cfap20dc), transcript variant X8, mRNA	0.67	0	0	0	0	0.59	0.6	0.9	0	1.45	0.67	0.36	0.17	0.61	0	0	0.23	0.26	0	0.07
XM_028853852.2	Dnase1l3	deoxyribonuclease 1 like 3 (Dnase1l3), transcript variant X2, mRNA	0	0	0.42	0	0	0	0	0	0.26	0	0.21	0	0	0	0.73	0	0	0	0	0
XM_028853853.2	Anxa4	annexin A4 (Anxa4), mRNA	4.57	9.6	9.77	8.41	12.48	15.12	9.97	6.7	9.78	17.58	7.22	4.03	2.82	10.94	5.74	15.28	19.87	2.83	0.31	8.5
XM_028853854.1	LOC114680740	olfactory receptor 1361-like (LOC114680740), mRNA	0	0	0	0	0	0	0	0	0	0	0	0	0.03	0.06	0	0.06	0	0	0	0.03
XM_028853855.2	Caskin1	CASK interacting protein 1 (Caskin1), transcript variant X1, mRNA	0.16	0	0.23	0	0	0	0	0	0.07	0.06	0	0	0.05	0.13	0	0	0	0	0.01	0.04
XM_028853856.2	Caskin1	CASK interacting protein 1 (Caskin1), transcript variant X2, mRNA	0.18	0.1	0	0.05	0.08	0.07	0.02	0.04	0	0	0.08	0.06	0	0	0.08	0.06	0.03	0.03	0.05	0
XM_028853858.2	Traf7	TNF receptor associated factor 7 (Traf7), transcript variant X1, mRNA	13.44	17.77	9.44	9.27	9.76	14.27	14.36	8.2	7.44	19.58	23.52	24.39	15.79	50.51	20.6	12.94	15.53	7.07	1.84	46.66
XM_028853860.2	Traf7	TNF receptor associated factor 7 (Traf7), transcript variant X2, mRNA	4.05	1.49	1.97	1.51	1.68	6.34	4.02	5.97	3.06	4.91	9.41	5.76	2.89	21.8	4.32	4.57	3.07	0.83	0	9.56
XM_028853861.2	Traf7	TNF receptor associated factor 7 (Traf7), transcript variant X3, mRNA	4.29	4.84	1.8	4.2	1.7	9.98	5.05	5.72	8.08	8.88	16.91	11.27	6.78	29.23	6.49	5.04	4.91	1.27	0.81	15.64
XM_028853862.2	Traf7	TNF receptor associated factor 7 (Traf7), transcript variant X4, mRNA	3.06	0.26	1.7	4.21	1.78	3.51	1.25	4.59	1.72	3.29	9.68	3.64	3	22.29	2.25	0.98	1.03	0	0.81	9.11
XM_028853863.2	Traf7	TNF receptor associated factor 7 (Traf7), transcript variant X5, mRNA	0	0.16	0	0	0	0.22	0.46	0	0	0	1.65	0	0	0.67	0.29	0	0	0.26	0	1.68
XM_028853864.2	Traf7	TNF receptor associated factor 7 (Traf7), transcript variant X6, mRNA	5.52	4.81	2.29	1.88	1.95	5.55	5.06	7.04	5.11	6.69	12.4	9.12	7.46	24.62	4.62	1.83	3.05	1.27	0.31	6.23
XM_028853865.2	Traf7	TNF receptor associated factor 7 (Traf7), transcript variant X7, mRNA	0	0	0	0	0	0.15	0	0	0	0.38	0	0	0.25	0	0	0.73	0	0	0	0
XM_028853866.2	Traf7	TNF receptor associated factor 7 (Traf7), transcript variant X8, mRNA	1.01	2.92	1.14	0.98	2.09	1.46	4.22	1.85	1.69	4.79	6.81	2.06	0.72	12.86	1.84	0	1.63	0	0.34	3.31
XM_028853868.2	Rab26	RAB26, member RAS oncogene family (Rab26), transcript variant X1, mRNA	0.08	0.16	0	0	0.12	0	0.12	0.26	0	0	0	0	0	0	0	0	0	0.04	0.04	0
XM_028853869.2	Rab26	RAB26, member RAS oncogene family (Rab26), transcript variant X2, mRNA	0.12	0	0	0	0	0	0	0	0	0	0	0	0	0	0	0	0	0	0	0
XM_028853870.2	Rab26	RAB26, member RAS oncogene family (Rab26), transcript variant X3, mRNA	0	0.04	0.11	0.07	0	0.23	0	0	0.13	0	0.12	0.02	0	0.04	0.07	0	0	0	0	0.11
XM_028853871.2	Abca3	ATP binding cassette subfamily A member 3 (Abca3), transcript variant X1, mRNA	2.86	3.29	1.46	1.21	1.65	2.57	1.54	1.93	0	6.1	2.64	2.69	1.39	5.92	1.94	2.63	6.25	0	0	1.2
XM_028853872.2	Gmcl1	germ cell-less 1, spermatogenesis associated (Gmcl1), mRNA	11.6	17.5	7.83	7.52	10.2	9.76	9.6	6.25	6.68	12.86	5.79	3.83	3.18	7.01	10.95	3.66	4.43	1.55	0.9	8.29
XM_028853873.1	Amdhd2	amidohydrolase domain containing 2 (Amdhd2), transcript variant X1, mRNA	2.98	1.24	1.33	0	2.15	1.59	3.17	2.79	1.54	1.83	2.21	2.46	2.51	3.62	1.32	1.98	0.96	0	0.24	4.85
XM_028853874.1	Amdhd2	amidohydrolase domain containing 2 (Amdhd2), transcript variant X2, mRNA	5.71	7.13	4.51	6.61	5.18	12.75	7.44	7.95	5.9	16.56	9.97	11.39	5.3	23.55	9.48	7.28	6.49	2.48	1.02	16.29
XM_028853875.1	Amdhd2	amidohydrolase domain containing 2 (Amdhd2), transcript variant X3, mRNA	0	0	0.22	0.67	0	0.48	0	0.39	0.27	0.06	0.21	0.34	0.25	0.35	0.38	0.24	0	0	0	0.23
XM_028853876.1	Amdhd2	amidohydrolase domain containing 2 (Amdhd2), transcript variant X4, mRNA	0	1.1	0.12	0.51	0	0.26	0	0.06	0.49	0.55	0	0.5	0	0.59	0.21	0.58	0	0	0	0
XM_028853877.1	Amdhd2	amidohydrolase domain containing 2 (Amdhd2), transcript variant X5, mRNA	0	0.56	0.09	0	0	0.45	0	0.5	0	0.23	0	0.38	0.28	0.48	0.79	0.32	0.19	0	0	0.43
XM_028853878.2	Atp6v0c	ATPase H+ transporting V0 subunit c (Atp6v0c), mRNA	68.19	75.27	53.51	53.62	67.93	113.3	87.68	78.6	61.79	118.39	185.25	309.09	139.31	359.25	180.95	252.34	248.64	58.12	20.92	487.74
XM_028853879.2	Zg16b	zymogen granule protein 16B (Zg16b), mRNA	0.21	0.22	0.13	0.28	0.12	0.19	0.17	0.1	0.18	0.43	0.02	0.04	0.27	0.51	0.64	0.21	0.28	0.03	0.04	0.14
XM_028853880.1	Tbc1d24	TBC1 domain family member 24 (Tbc1d24), transcript variant X1, mRNA	0	0	1.33	0	0	0	0	0	0	0	0	0.16	0.19	0	0	0	0	0	0.1	1.07
XM_028853881.1	Tbc1d24	TBC1 domain family member 24 (Tbc1d24), transcript variant X2, mRNA	0	0	0	0	0	0	0.35	0.43	0	0.56	0	0	0	0	0	0	0.05	0	0	0
XM_028853882.1	Tbc1d24	TBC1 domain family member 24 (Tbc1d24), transcript variant X3, mRNA	1.12	2.17	0	1.25	1.84	1.44	0.74	0.52	1.05	2.08	0.67	0.58	0.34	1.9	1.21	1.42	0.94	0.23	0.05	0.67
XM_028853883.2	Slc9a3r2	SLC9A3 regulator 2 (Slc9a3r2), transcript variant X1, mRNA	0.84	1.5	0.67	0.97	3.36	0.63	1.14	0.75	1.04	1.47	0.13	0.09	0.17	0	0	0.22	0	0.18	0.1	0.14
XM_028853884.2	Slc9a3r2	SLC9A3 regulator 2 (Slc9a3r2), transcript variant X2, mRNA	0.12	0	0.05	0	0	0	0	0	0	0	0	0	0	0	0	0	0	0	0	0
XM_028853885.2	Slc9a3r2	SLC9A3 regulator 2 (Slc9a3r2), transcript variant X3, mRNA	0.16	0.35	0.28	0.3	1.5	0.82	0.5	0.1	0.26	1.42	0	0	0	0.18	0.19	0.1	0.07	0.08	0	0
XM_028853886.2	Snrnp27	small nuclear ribonucleoprotein U4/U6.U5 subunit 27 (Snrnp27), mRNA	19.55	23.18	14.32	14.29	15.83	20.97	23.69	14.69	18.64	30.26	16.98	14.12	9.62	22.51	20.23	26.44	29.57	8.37	3.22	14.81
XM_028853887.2	Flywch1	FLYWCH-type zinc finger 1 (Flywch1), mRNA	3.3	4.55	3.25	2.32	2.77	3.71	4.84	2.24	3.22	7.07	1.78	1.3	1.32	3.26	2.55	1.75	1.95	0.52	0.43	1.84
XM_028853888.2	LOC114680755	ATP-binding cassette sub-family A member 17-like (LOC114680755), transcript variant X2, mRNA	0	0	0	0	0	0	0	0	0	0	0	0	0.1	0.03	0	0	0.07	0	0	0
XM_028853889.2	Rnps1	RNA binding protein with serine rich domain 1 (Rnps1), transcript variant X2, mRNA	5.27	11.1	5.04	3.05	6.62	5.9	5.82	4.18	7.28	8.89	4.5	2.95	2.33	6.66	6.15	5.88	4.73	1.38	0.9	3.29
XM_028853890.2	Rnps1	RNA binding protein with serine rich domain 1 (Rnps1), transcript variant X1, mRNA	8.79	6.66	5.68	4.79	5.46	6.9	8.43	3.09	6.23	9.31	5.07	2.68	2.95	5.57	6.56	5.86	10.01	0.35	1.21	5.05
XM_028853891.1	Rnps1	RNA binding protein with serine rich domain 1 (Rnps1), transcript variant X3, mRNA	5.27	4.95	3.14	5.51	1.44	2.06	4.62	3.91	4.05	6.96	1	1.38	1.61	3.77	1.87	0.94	1.31	0.68	0	3.98
XM_028853892.2	Rnps1	RNA binding protein with serine rich domain 1 (Rnps1), transcript variant X4, mRNA	20.56	27.99	16.82	17.63	19.1	21.17	29.37	22.41	18.09	33.84	16.78	15.92	8.07	24.78	28.1	27.16	41.04	7.65	1.8	15.98
XM_028853893.1	Znf598	zinc finger protein 598, E3 ubiquitin ligase (Znf598), transcript variant X1, mRNA	3.22	6.02	3.95	3.67	4.71	1.86	0.61	3.78	1.52	6.88	1.55	2.17	1.03	5.45	2.95	0.07	0.34	0	0.1	2.66
XM_028853894.1	Znf598	zinc finger protein 598, E3 ubiquitin ligase (Znf598), transcript variant X2, mRNA	5.97	5.29	3	3.18	3.47	5.74	9.38	3.3	4.87	7.95	5.11	8.12	4.17	9.35	10.5	7.76	11.2	2.43	1.36	9.62
XM_028853895.2	Adgrl3	adhesion G protein-coupled receptor L3 (Adgrl3), transcript variant X25, mRNA	0	0	0	0	0	0	0	0	0	0	0	0	0	0	0	0	0	0	0	0
XM_028853896.2	Pkd1	polycystin 1, transient receptor potential channel interacting (Pkd1), transcript variant X1, mRNA	0	0	0	0.06	0	0	0.00677	0.21	0	0	0	0	0	0	0	0	0	0	0	0
XM_028853897.2	Pkd1	polycystin 1, transient receptor potential channel interacting (Pkd1), transcript variant X2, mRNA	0	0	0	0.12	0	0	0	0.18	0	0	0	0	0	0	0	0	0	0	0	0
XM_028853898.2	Pkd1	polycystin 1, transient receptor potential channel interacting (Pkd1), transcript variant X3, mRNA	0	0.16	0.13	0.01	0	0	0.29	0.24	0	0.23	0	0	0.18	0.14	0	0	0.25	0	0	0.22
XM_028853899.2	Pkd1	polycystin 1, transient receptor potential channel interacting (Pkd1), transcript variant X4, mRNA	0.92	0.47	0.00189	0.83	0.00871	0.75	1.32	0.26	0	0.00891	0.16	0.14	0	0.02	0.04	0	0.14	0.06	0	0.04
XM_028853901.2	Pkd1	polycystin 1, transient receptor potential channel interacting (Pkd1), transcript variant X5, mRNA	0.23	0	0	0.67	0.00436	0	0	0.17	0	0	0.02	0	0	0.01	0	0	0	0.04	0.05	0
XM_028853902.2	Pkd1	polycystin 1, transient receptor potential channel interacting (Pkd1), transcript variant X6, mRNA	1.21	3.38	1.74	0.57	2.32	1.89	1.68	0	1.87	3.89	0.68	0.34	0.97	1.43	1.05	0.57	1.13	0	0.18	0.47
XM_028853903.2	Pkd1	polycystin 1, transient receptor potential channel interacting (Pkd1), transcript variant X7, mRNA	1	2.34	1.28	0.2	0.9	1.1	0.63	0.48	1.43	2.23	0.4	0.43	0.21	0.9	1.56	0.5	0.53	0.06	0	0.39
XM_028853904.2	Pkd1	polycystin 1, transient receptor potential channel interacting (Pkd1), transcript variant X8, mRNA	0.2	0	0.08	0.18	0.64	0	0	0.3	0	0.21	0.01	0	0	0.15	0.06	0.02	0	0.05	0	0
XM_028853905.2	Tsc2	TSC complex subunit 2 (Tsc2), transcript variant X1, mRNA	0	0	0	0	0	0	0	0	0	0	0	0	0	0	0	0	0	0	0	0
XM_028853906.2	Tsc2	TSC complex subunit 2 (Tsc2), transcript variant X2, mRNA	0.42	0	0	0	0.08	0	0	0	0	0	0	0	0	0	0	0	0	0	0	0
XM_028853907.2	Tsc2	TSC complex subunit 2 (Tsc2), transcript variant X3, mRNA	0	0.38	0.19	0	0.05	0	0.17	0	0	0	0.11	0	0	0	0	0	0	0	0	0
XM_028853908.2	Tsc2	TSC complex subunit 2 (Tsc2), transcript variant X5, mRNA	0	0	0	0	0	0	0	0	0	0	0	0	0	0	0	0	0	0	0.11	0
XM_028853909.2	Tsc2	TSC complex subunit 2 (Tsc2), transcript variant X6, mRNA	0	0	0	0	0	0.05	0	0	0	0	0	0	0	0	0	0	0.36	0	0	0
XM_028853910.2	Tsc2	TSC complex subunit 2 (Tsc2), transcript variant X7, mRNA	0	0	0	0	0	0	0	0	0	0	0	0	0	0	0	0	0	0	0.06	0
XM_028853911.1	Tsc2	TSC complex subunit 2 (Tsc2), transcript variant X8, mRNA	0	0	0	0	0	0	0	0	0	0	0	0	0	0	0	0	0	0	0	0
XM_028853912.2	Tsc2	TSC complex subunit 2 (Tsc2), transcript variant X10, mRNA	0	0.08	0.00955	0.3	0	0.16	0.33	0.14	0.07	0.1	0	0	0	0	0.02	0.04	0	0	0	0.25
XM_028853913.2	Tsc2	TSC complex subunit 2 (Tsc2), transcript variant X11, mRNA	0	0.1	0.00955	0.33	0	0.12	0.41	0.23	0.3	0.16	0	0	0	0	0.05	0.08	0	0	0	0.54
XM_028853914.2	Tsc2	TSC complex subunit 2 (Tsc2), transcript variant X12, mRNA	0	0	0	0.00975	0	0	0.05	0	0	0	0	0	0	0	0.31	0.23	0	0	0	0
XM_028853915.2	Tsc2	TSC complex subunit 2 (Tsc2), transcript variant X13, mRNA	0	0	0	0	0	0	0.01	0	0	0	0	0	0	0	0.5	0.34	0	0	0	0
XM_028853916.2	Pcbp1	poly(rC) binding protein 1 (Pcbp1), mRNA	64.19	71.49	45.24	49.07	51.71	67.8	88.28	47.39	59.15	97.75	57.36	60.32	33.36	85.82	58.6	76.71	97.28	21.45	9.33	93.02
XM_028853917.2	Tsc2	TSC complex subunit 2 (Tsc2), transcript variant X14, mRNA	3.6	3.75	2.9	2.66	3.58	2.67	3.19	1.5	1.66	4.33	0	0	1.24	3.43	1.63	1.89	2.47	0.02	0.09	0.88
XM_028853918.1	Tsc2	TSC complex subunit 2 (Tsc2), transcript variant X15, mRNA	0.69	1.57	0.28	0	0.84	0.93	1.68	0	0	2.57	0.96	0.83	0	0	1.33	0	0.52	0.81	0	0.98
XM_028853920.2	Tsc2	TSC complex subunit 2 (Tsc2), transcript variant X16, mRNA	1.89	6.47	2.34	3.29	2.67	3.98	3.05	2.44	5.23	6.47	2.42	2.35	1.44	2.2	2.29	2.15	3.7	0	0.09	1.66
XM_028853921.2	Nthl1	nth like DNA glycosylase 1 (Nthl1), mRNA	3.32	3.89	1.77	1.83	3.03	1.98	2.59	2.4	1.52	3.6	1.55	0.27	0.78	1.63	1.53	1.49	1.86	0.32	0.25	0.65
XM_028853922.1	LOC114680763	olfactory receptor 1361-like (LOC114680763), mRNA	0	0	0	0	0	0	0	0	0	0	0.03	0.19	0.03	0.06	0.22	0	0.06	0.03	0	0.19
XM_028853923.2	LOC114680766	putative caspase-16 (LOC114680766), mRNA	0.02	0	0	0	0.03	0.22	0.03	0	0	0.06	0	0	0	0	0.23	0	0	0	0	0
XM_028853924.2	LOC114680767	prostatic spermine-binding protein-like (LOC114680767), mRNA	0	0	0	0	0	0	0	0	0	0	0	0	0	0	0	0	0	0	0	0
XM_028853925.2	LOC114680768	brain-specific serine protease 4 (LOC114680768), transcript variant X1, mRNA	0	0	0	0	0	0	0	0	0	0	0	0	0	0	0	0	0	0	0	0
XM_028853926.2	C3H2orf42	chromosome 3 C2orf42 homolog (C3H2orf42), transcript variant X1, mRNA	0.52	0.86	0.65	0.18	0.62	1.46	1.3	0.65	0.48	1.57	0.53	0	0.1	1.46	1.22	0.57	0.63	0.66	0	0.66
XM_028853927.2	Prss27	serine protease 27 (Prss27), mRNA	0.01	0.04	0.00637	0	0	0.03	0.05	0.02	0	0.1	0.02	0.04	0.03	0.04	0.05	0.09	0	0	0	0.07
XM_028853928.1	LOC114680770	transmembrane protein 100-like (LOC114680770), mRNA	0	0.09	0	0	0	0	0	0	0	0	0	0	0	0	0	0	0	0	0	0
XM_028853930.2	Bricd5	BRICHOS domain containing 5 (Bricd5), transcript variant X3, mRNA	0.96	0.81	0.94	0.83	1.02	0.48	0.82	1.1	1.03	2.31	0.99	0.18	0.04	0.73	0.69	0.07	0.35	0.34	0.07	0.18
XM_028853931.1	Npw	neuropeptide W (Npw), mRNA	0.1	0.04	0	0	0.07	0.04	0	0	0.1	0.06	0	0	0	0.06	0	0	0	0	0	0.06
XM_028853932.2	Noxo1	NADPH oxidase organizer 1 (Noxo1), mRNA	1.56	2.13	1.56	1.43	1.62	1.08	1.89	1.5	1.45	2.19	0.98	1.35	1.42	2.76	2.71	0.96	1.44	0.33	0.3	2.69
XM_028853934.2	C3H2orf42	chromosome 3 C2orf42 homolog (C3H2orf42), transcript variant X2, mRNA	0.47	0.29	0.36	0.44	0.3	0.31	0.4	0.41	0.79	0.86	0.1	0.25	0.29	0.67	0.77	0.16	0.14	0.03	0.02	0.19
XM_028853935.2	Ntn3	netrin 3 (Ntn3), transcript variant X1, mRNA	0.07	0.16	0.1	0.14	0.07	0.05	0.07	0.04	0.15	0.15	0.03	0.04	0.03	0.09	0.08	0.12	0.12	0	0	0.04
XM_028853936.2	Bicdl2	BICD family like cargo adaptor 2 (Bicdl2), mRNA	0	0.04	0.02	0.02	0.08	0.03	0.08	0.07	0.16	0.24	0.35	1.02	0.87	0.7	0.36	0.26	0.2	0.17	0.07	1.66
XM_028853937.2	Thoc6	THO complex 6 (Thoc6), mRNA	9.03	14.08	7.92	6.04	7.26	9.83	10.85	8.28	8.75	15.22	7.74	7.05	4.64	12.03	9.16	6.09	5.13	1.99	1.67	10.84
XM_028853938.2	Tnfrsf12a	TNF receptor superfamily member 12A (Tnfrsf12a), mRNA	0.79	1.52	0.84	0.96	1.74	1.67	0.97	1.47	0.72	1.51	1.82	1.41	1.15	2.41	2.72	2.09	2.38	0.84	0.16	4.09
XM_028853939.2	Hcfc1r1	host cell factor C1 regulator 1 (Hcfc1r1), transcript variant X1, mRNA	21.68	27.28	12.34	20.28	18.04	30.4	28.27	22.76	26.45	34.19	27.96	24.65	14.97	36.62	15.38	15.07	20.68	12.62	4.92	45.79
XM_028853940.2	Hcfc1r1	host cell factor C1 regulator 1 (Hcfc1r1), transcript variant X2, mRNA	1.34	2.29	1.39	1.42	1.33	2.26	2.67	2.27	1.24	4.98	1.25	0.55	0.79	1.66	0.8	0.54	0.42	0.29	0.56	0.88
XM_028853941.2	Paqr4	progestin and adipoQ receptor family member 4 (Paqr4), mRNA	0.99	1.52	1.24	0.91	1.29	1.69	2.06	1.37	1.27	2.29	1.47	2.35	1.34	1.95	1.76	1.64	1.52	0.56	0.28	3.15
XM_028853942.2	C3H2orf42	chromosome 3 C2orf42 homolog (C3H2orf42), transcript variant X3, mRNA	1.64	1.63	1.08	1.2	1.13	0.4	1.63	1.2	0.2	1.02	0.82	1.25	0.61	0.47	0.12	0.67	1.66	0	0.13	0.57
XM_028853943.2	Pkmyt1	protein kinase, membrane associated tyrosine/threonine 1 (Pkmyt1), transcript variant X1, mRNA	2.32	1.88	2.28	1.54	0.89	2.43	2.41	2.48	0.76	4.61	3.29	2.86	3.39	2.75	2.74	0.76	0.89	1.47	0.69	3.21
XM_028853944.2	Or1f19	olfactory receptor 1361-like (LOC114680783), mRNA	0	0.04	0	0	0	0.04	0	0	0	0	0.15	0.46	0.34	0.25	0.12	0.07	0.12	0.18	0	0.19
XM_028853946.2	Znf205	zinc finger protein 205 (Znf205), transcript variant X1, mRNA	0	0	0	0	0.17	0	0	0	0	0	0	0	0	0	0	0	0	0	0	0
XM_028853947.2	Znf205	zinc finger protein 205 (Znf205), transcript variant X2, mRNA	0	0	0	0	0	0	0	0	0	0	0	0	0	0	0	0	0	0	0	0
XM_028853948.2	Ccnf	cyclin F (Ccnf), transcript variant X1, mRNA	0.58	0.75	0.86	0.63	1.85	0.7	1.26	0.35	0.75	1.13	0.5	1.11	0.65	2.09	8.37	4.13	0.74	0.43	0.3	4.82
XM_028853949.2	Ccnf	cyclin F (Ccnf), transcript variant X2, mRNA	0	0	0	0	0	0	0	0	0	0	0	0	0	0	0	0	0	0	0	0
XM_028853950.2	Syngr3	synaptogyrin 3 (Syngr3), mRNA	0.02	0.31	0.42	0.08	0.21	0.07	0.12	0.04	0.05	0.17	0.06	0.08	0	0.14	0	0.09	0.06	0	0.06	0.1
XM_028853951.2	Cldn9	claudin 9 (Cldn9), mRNA	0	0.06	0.03	0.01	0	0	0.02	0.02	0	0.05	0.03	0.07	0.15	0.12	0.29	0	0	0	0	0.07
XM_028853952.2	Eci1	enoyl-CoA delta isomerase 1 (Eci1), mRNA	8.57	10.92	6.7	6.81	11.46	8.05	9.28	5.56	6.42	11.93	5.06	1.62	0.95	5.19	2.76	8.07	6.32	2.06	0.75	2.51
XM_028853953.2	Tbl3	transducin beta like 3 (Tbl3), mRNA	6.58	10.4	4.96	5.27	4.69	5.55	7.22	4.98	6.72	10.55	5.09	4.03	1.93	6.95	7.12	9.19	15.39	1.25	0.96	3.06
XM_028853954.2	Tia1	TIA1 cytotoxic granule associated RNA binding protein (Tia1), transcript variant X1, mRNA	0.99	0.94	0.51	0.95	2.03	2.29	1.41	0.68	0.72	3.41	1.11	0.59	0	0	0.97	1.18	0.39	0.31	0.26	0.24
XM_028853955.2	Mmp25	matrix metallopeptidase 25 (Mmp25), mRNA	6.25	7.64	5.14	6.79	7.79	20.99	11.14	11.6	8.18	23.25	87.65	194.74	115.44	166.63	74.75	25.5	28.78	15.93	7.16	174.07
XM_028853956.1	Elob	elongin B (Elob), mRNA	89.27	110.41	110.61	103.6	92.57	142.02	96.48	79.33	114.58	124.2	117.2	88.76	93.68	118.95	145.13	140.49	118.82	114.79	59.08	62.9
XM_028853957.2	Rnf151	ring finger protein 151 (Rnf151), mRNA	0	0.04	0.06	0	0	0	0.11	0.1	0.11	0	0.21	0	0.04	0.07	0.08	0	0.35	0	0	0.12
XM_028853958.2	Msrb1	methionine sulfoxide reductase B1 (Msrb1), mRNA	64.37	36.98	34.82	35.91	54.89	173.64	68.33	93.68	38.91	102.36	562.16	789.16	379.02	978.11	375.05	114.6	169.43	139.36	30.37	703.49
XM_028853959.2	Pdpk1	3-phosphoinositide dependent protein kinase 1 (Pdpk1), transcript variant X1, mRNA	4.25	16.04	8.97	6.96	9.84	9.14	9.76	0	6.8	15.34	6.16	8.59	5.59	10.14	12.51	5.16	7.92	0	0	12.05
XM_028853960.2	Kctd5	potassium channel tetramerization domain containing 5 (Kctd5), mRNA	5.01	5.53	3	2.9	4.74	4.67	5.44	4.39	3.92	6.7	3.97	3.9	2.86	6.34	4.9	4.74	7.55	1.05	0.55	4.72
XM_028853961.2	Tia1	TIA1 cytotoxic granule associated RNA binding protein (Tia1), transcript variant X2, mRNA	1.86	0.23	0.46	0.77	0.19	0	1.3	0.56	1.47	0	0.47	0.51	1.05	2.25	1.45	0	1.03	0	0	1.37
XM_028853962.2	Znf213	zinc finger protein 213 (Znf213), transcript variant X1, mRNA	0.27	0.41	0.48	0.47	0	0.28	0.21	0.3	0.87	0	0.24	0.27	0.13	0.46	0.31	0.69	0.85	0.17	0	0.39
XM_028853963.1	Rpl3l	ribosomal protein L3 like (Rpl3l), transcript variant X2, mRNA	0.12	0.09	0.41	0	2.3	0	0	0	0	0.14	0.12	0.27	0	0	0.12	0	0.21	0.43	0	0
XM_028853964.2	Ndufb10	NADH:ubiquinone oxidoreductase subunit B10 (Ndufb10), mRNA	31.29	31.98	19.17	22.49	25.8	28.77	38.25	24.22	27.26	44.32	22.06	14.63	8.32	27.25	22.43	15.46	23.3	11.73	3.77	18.68
XM_028853966.2	LOC119086114	serine protease 41-like (LOC119086114), mRNA	0.38	0.29	0.25	0.33	0.24	0.06	0.29	0.21	0.16	0.52	0.25	0.07	0.16	0.6	0	0.1	0.03	0	0.05	0.04
XM_028853967.2	LOC114680801	serine protease 33 (LOC114680801), mRNA	0	0.16	0	0.04	0.04	0.02	0.03	0.05	0	0.08	0	0.03	0.04	0.04	0	0	0	0	0	0.02
XM_028853968.2	Rps2	ribosomal protein S2 (Rps2), mRNA	605.29	721.34	377.66	431.91	433.22	588.8	671.83	441	446.95	742.26	314.24	192.6	190.39	417.04	360.87	438.44	566.61	174.11	86.13	223.45
XM_028853969.2	Gfer	growth factor, augmenter of liver regeneration (Gfer), transcript variant X1, mRNA	2.43	2.88	1.86	1.24	1.4	1.83	2.09	1.64	2.64	2.56	0.48	1.24	0.56	2.85	2.71	3.56	5.39	0.63	0	2.13
XM_028853973.2	Flywch2	FLYWCH family member 2 (Flywch2), transcript variant X1, mRNA	0	0.16	0	0	0	0	0.19	0	0.12	0	0	0	0	0	0	0.23	0.15	0	0.07	0.14
XM_028853974.1	Tia1	TIA1 cytotoxic granule associated RNA binding protein (Tia1), transcript variant X4, mRNA	1.37	2.87	2.06	0.89	1.19	1.13	1.27	0.74	1.49	1.63	0.16	0.25	0.29	1.43	2.12	0.26	0.17	0.14	0.11	0.87
XM_028853975.2	Srrm2	serine/arginine repetitive matrix 2 (Srrm2), transcript variant X1, mRNA	13.9	30.02	12	13.36	11.89	17.39	13.9	9.7	12.35	27.38	14.66	20.4	14.15	24.12	12.1	12.02	22.8	2.47	3.2	29.42
XM_028853976.2	Srrm2	serine/arginine repetitive matrix 2 (Srrm2), transcript variant X3, mRNA	1.88	4.07	2.26	2.37	2.35	2.8	1.95	1.26	3.27	4.45	1.66	3.11	2.35	5.52	4.11	1.88	1.16	0.31	0.28	3.61
XM_028853977.2	Srrm2	serine/arginine repetitive matrix 2 (Srrm2), transcript variant X2, mRNA	12.23	18.08	8.8	7.96	11.83	12.55	12.66	2.96	14.4	26.52	7.35	11.25	9.26	22.21	16.71	9.1	7.32	1.38	0.00642	11.38
XM_028853978.2	Adgrl3	adhesion G protein-coupled receptor L3 (Adgrl3), transcript variant X26, mRNA	0	0	0	0	0	0	0	0	0	0	0	0	0	0	0	0	0	0	0	0
XM_028853979.2	Srrm2	serine/arginine repetitive matrix 2 (Srrm2), transcript variant X6, mRNA	17.58	38.04	13.62	16.41	15.04	18.99	22.52	9.22	21.31	45.39	11.63	14.54	18.03	36.11	25.59	4.96	5.1	1.04	1.85	15.4
XM_028853980.2	Srrm2	serine/arginine repetitive matrix 2 (Srrm2), transcript variant X9, mRNA	10.9	31.94	10.79	6.52	9.65	11.52	8.55	3.6	7.71	24.15	6.05	5.19	6.75	16.21	13.9	2.23	2.81	0.53	0.93	10.71
XM_028853981.2	LOC114680806	testisin (LOC114680806), mRNA	0	0.06	0.15	0	0	0.09	0	0	0	0.02	0.05	0	0	0.15	0	0	0	0	0	0
XM_028853982.2	Tia1	TIA1 cytotoxic granule associated RNA binding protein (Tia1), transcript variant X5, mRNA	0.88	2.31	1.72	0.62	0.83	0.22	1.04	0.55	0.95	0.99	0.51	0.34	0.7	1.2	2.42	0.18	0.17	0.05	0	0.56
XM_028853983.2	Tedc2	tubulin epsilon and delta complex 2 (Tedc2), mRNA	2.1	2.94	1.72	1.43	1.05	1.71	2.12	1.85	1.14	2.8	0.82	0.41	0.66	1.47	1.37	1.27	1.16	0.34	0.07	0.81
XM_028853984.2	Hs3st6	heparan sulfate-glucosamine 3-sulfotransferase 6 (Hs3st6), transcript variant X1, mRNA	0	0	0	0	0	0	0	0	0	0	0	0	0	0	0	0	0	0	0	0
XM_028853986.2	Cldn6	claudin 6 (Cldn6), mRNA	0.08	0.04	0.01	0.05	0.05	0.05	0.06	0.14	0.04	0.23	0.05	0.07	0.03	0.2	0.47	0	0	0.03	0.05	0.2
XM_028853987.2	LOC114680811	serine protease 27-like (LOC114680811), mRNA	0.28	0	0.06	0.11	0.12	0.08	0.03	0.27	0.05	0.22	0	0.06	0.09	0.25	0.04	0.13	0	0	0	0.03
XM_028853988.2	Kremen2	kringle containing transmembrane protein 2 (Kremen2), transcript variant X1, mRNA	0	0	0	0.03	0	0	0	0	0.04	0	0	0.02	0	0.03	0.21	0	0	0	0.11	0
XM_028853990.2	LOC114680813	serine protease 30-like (LOC114680813), mRNA	0.06	0.09	0.04	0.01	0.01	0.03	0.01	0	0	0.05	0.07	0.04	0.01	0.03	0.13	0.06	0.41	0	0	0.15
XM_028853991.2	Zscan10	zinc finger and SCAN domain containing 10 (Zscan10), mRNA	0.08	0.09	0.1	0.12	0.16	0.15	0.37	0.28	0.07	0.36	0.86	1.3	0.55	2.72	0.49	0.23	0.23	0.1	0.06	1.11
XM_028853992.1	E4f1	E4F transcription factor 1 (E4f1), transcript variant X1, mRNA	7.04	11.74	5.81	6.43	5.53	6.89	9.48	4.85	8.08	15.2	6.13	3.53	3.45	7.53	6.66	2.17	3.18	1.29	0.59	4.87
XM_028853993.1	E4f1	E4F transcription factor 1 (E4f1), transcript variant X2, mRNA	2.13	2.4	1.3	2	1.02	2.35	3.33	2.61	1.46	5.18	1.23	1.14	0.93	2.97	1.34	1.87	1.45	0.21	0	0.98
XM_028853994.2	LOC114680816	phosphoglycolate phosphatase (LOC114680816), mRNA	7.86	8.55	7.55	7.36	7.42	11.18	12.38	10.05	10.02	20.29	9.13	6.91	3.6	8.31	6.09	9.14	7.15	1.38	1.03	11.24
XM_028853995.2	Mlst8	MTOR associated protein, LST8 homolog (Mlst8), transcript variant X1, mRNA	6.74	8.94	6.64	6.01	6.93	7.16	8.82	5.26	8.37	13.14	5.05	3.48	2.83	7.26	6.56	5.88	7.77	1.73	0.68	4.62
XM_028853996.2	Tia1	TIA1 cytotoxic granule associated RNA binding protein (Tia1), transcript variant X7, mRNA	0.8	2.2	1.42	0.16	0.69	0.48	0.85	0.53	0.81	0.45	0	0.36	1	0.43	0.73	0.6	0.28	0	0	1.47
XM_028853997.2	Mlst8	MTOR associated protein, LST8 homolog (Mlst8), transcript variant X2, mRNA	0.32	1.24	0	0	0.3	0.31	0	1.37	0	2.07	0	0	0.38	0.77	0.49	0.67	0.46	0	0	0.41
XM_028853998.2	Dnase1l2	deoxyribonuclease 1 like 2 (Dnase1l2), mRNA	5.21	5.07	2.4	3.1	3.23	2.8	5.05	2.65	3.6	8.13	2.2	1.94	2.71	4.85	4.96	1.38	1.18	0.55	0.38	1.73
XM_028853999.2	Pcyox1	prenylcysteine oxidase 1 (Pcyox1), mRNA	19.26	29.02	17.31	17.17	20.99	26	22.58	15.11	17.78	34.77	13.29	8.74	8.45	20.71	17.83	6.51	7.25	2.3	1.46	22.03
XM_028854000.2	LOC114680842	zinc finger protein OZF-like (LOC114680842), transcript variant X5, mRNA	0.63	0.44	0.47	0.23	0.44	0.11	0.13	0.28	0.03	0.35	0.09	0.05	0.21	0.16	0.13	0.09	0.09	0	0	0
XM_028854001.2	LOC114680838	zinc finger protein OZF-like (LOC114680838), transcript variant X1, mRNA	1.85	2	1.22	0.7	1.06	1.32	1.32	0.72	1.28	1.8	0.56	0.28	0.25	0.65	2	0.58	0.79	0	0.11	0.06
XM_028854002.2	LOC114680839	zinc finger protein 883-like (LOC114680839), mRNA	1.37	2.05	1.4	0.91	1.19	1.02	0.76	0.54	0.87	1.8	0.36	0.38	0.25	0.53	1.18	0.27	0.26	0.08	0.01	0.25
XM_028854008.2	Snrpg	small nuclear ribonucleoprotein polypeptide G (Snrpg), transcript variant X1, mRNA	114.91	136.64	85.43	82.67	100.6	97.32	135.58	77.24	92.67	130.63	64.18	35.98	27.38	69.2	73.03	59.03	85.61	28.07	9.36	29.02
XM_028854009.2	LOC114680841	zinc finger protein 345-like (LOC114680841), transcript variant X1, mRNA	2.28	2.51	2.05	1.32	1.93	0.79	1.67	0.98	1.18	2.9	0.77	1.15	0.83	1.36	0.63	0.45	0.61	0	0.08	0.97
XM_028854011.2	LOC114680842	zinc finger protein OZF-like (LOC114680842), transcript variant X6, mRNA	4.04	3.73	2.74	2.81	1.85	3.6	3.53	2.35	3.21	5.35	2.83	2.87	2.32	4.94	4.17	1.67	1.47	0.5	0.29	2.22
XM_028854012.2	LOC114680843	zinc finger protein 14-like (LOC114680843), mRNA	6.44	6.7	4.56	2.83	4.4	2.83	4.52	3	4.12	6.07	1.79	1.55	1.36	2.39	3.54	1.32	1.94	0.7	0.35	1.56
XM_028854013.2	LOC114680844	cytochrome P450 4F6 (LOC114680844), transcript variant X1, mRNA	0.57	0.7	0.46	0.72	0.73	1.6	0.99	0.74	1.27	1.58	0.66	0.58	0.63	1.45	1.39	0.77	0.63	0.04	0.08	0.62
XM_028854014.2	LOC114680844	cytochrome P450 4F6 (LOC114680844), transcript variant X3, mRNA	0	0	0	0	0	0	0	0	0	0	0	0	0.01	0	0	0	0	0	0	0
XM_028854015.2	LOC114680844	cytochrome P450 4F6 (LOC114680844), transcript variant X2, mRNA	0	0	0	0	0.15	0.14	0.08	0.09	0	0.24	0.25	0	0	0.07	0	0.12	0.55	0	0	0
XM_028854016.2	LOC114680845	zinc finger protein 709-like (LOC114680845), transcript variant X2, mRNA	3.7	5.02	3.74	2.28	2.98	2.61	2.69	1.18	2.48	4.19	1.23	0.84	1.39	1.93	2.95	1.18	2.33	0.26	0.16	0.62
XM_028854017.2	LOC114680847	leukotriene-B4 omega-hydroxylase 3 (LOC114680847), mRNA	0	0.02	0.16	0	0	0	0	0	0	0.04	0.03	0.01	0	0.02	0	0.03	0	0	0	0
XM_028854018.2	LOC114680848	zinc finger protein 709-like (LOC114680848), mRNA	0	0	0	0	0	0	0	0	0	0	0	0	0	0	0	0	0	0	0	0
XM_028854020.2	Fam136a	family with sequence similarity 136 member A (Fam136a), transcript variant X1, mRNA	4.13	5.36	3.92	3.44	4.27	4.18	4.98	2.99	3.47	6.21	4.44	2.41	1.63	6.17	4.89	10.66	9.26	1.35	0.73	3.49
XM_028854021.2	LOC114680855	olfactory receptor 10T2-like (LOC114680855), mRNA	0	0	0	0	0	0	0	0	0	0	0	0	0	0	0	0	0	0	0	0
XM_028854022.2	LOC114680858	cytochrome P450 4F22 (LOC114680858), transcript variant X1, mRNA	0.29	0.49	0	0.58	0.38	1.27	0.33	0	0	1.65	0.97	4.19	1.62	1.04	0	0.32	0.2	1.91	0	0.93
XM_028854023.1	LOC114680859	cytochrome P450 4F5 (LOC114680859), transcript variant X1, mRNA	7.72	8.81	4.43	5.18	4.62	4.44	10.45	6.31	5.82	13.45	5.38	1.26	1.51	5.52	3.78	1.44	1.37	0.64	0.44	2.64
XM_028854024.2	LOC114680860	cytochrome P450 4F6-like (LOC114680860), transcript variant X1, mRNA	0.49	0.49	0.23	0.65	0.49	1.91	1.23	0.59	1.33	1.76	0.17	0.29	0.19	0.61	0	0.57	0.56	0	0	0.73
XM_028854025.2	LOC114680860	cytochrome P450 4F6-like (LOC114680860), transcript variant X2, mRNA	0.43	0.75	0.5	0.52	0.38	1.13	0.58	0.43	0.64	1.79	0.77	0.08	0.08	0.96	0.66	0.4	0.27	0.04	0.02	0.27
XM_028854026.2	Tgfa	transforming growth factor alpha (Tgfa), transcript variant X1, mRNA	0	0	0.05	0	0	0	0	0	0	0.15	0	0	0	0	0	0	0	0	0	0
XM_028854028.2	LOC114680864	cytochrome P450 4F4 (LOC114680864), transcript variant X1, mRNA	0	0	0	0	0	0	0	0	0	0	0	0	0	0	0	0	0	0	0	0
XM_028854029.2	LOC114680864	cytochrome P450 4F4 (LOC114680864), transcript variant X3, mRNA	0	0	0	0.05	0	0	0	0	0	0.02	0	0	0	0	0	0	0	0	0	0
XM_028854030.2	LOC114680864	cytochrome P450 4F4 (LOC114680864), transcript variant X4, mRNA	0	0	0	0	0	0	0	0	0	0	0	0	0	0	0	0	0	0	0	0
XM_028854031.2	LOC114680864	cytochrome P450 4F4 (LOC114680864), transcript variant X5, mRNA	0	0	0.03	0	0	0	0	0	0	0	0	0	0	0	0	0	0	0	0	0
XM_028854032.2	LOC114680864	cytochrome P450 4F4 (LOC114680864), transcript variant X6, mRNA	0	0	0	0	0.05	0	0	0	0	0	0	0	0	0	0	0.03	0	0	0	0
XM_028854033.2	Tgfa	transforming growth factor alpha (Tgfa), transcript variant X2, mRNA	0	0.18	0.1	0.11	0.06	0	0	0.08	0	0.07	0	0.05	0.06	0	0	0.06	0	0	0	0
XM_028854035.2	LOC114680865	cytochrome P450 4F1-like (LOC114680865), mRNA	0.43	0.93	0.42	0.54	0.52	0.41	0.37	0.31	0.64	0.88	0.52	0.42	0.53	1.18	0.75	0.15	0.31	0.06	0.08	0.82
XM_028854036.2	LOC114680866	zinc finger protein 878-like (LOC114680866), mRNA	0	0.11	0.07	0.02	0.09	0.09	0.04	0.01	0.09	0	0.00926	0	0	0.06	0.11	0	0.02	0	0	0
XM_028854037.2	Adgrl3	adhesion G protein-coupled receptor L3 (Adgrl3), transcript variant X27, mRNA	0	0	0	0	0	0	0	0	0	0	0	0	0	0	0	0	0	0	0	0
XM_028854041.2	LOC114680869	zinc finger protein 709-like (LOC114680869), mRNA	3.65	5.65	2.97	1.4	3.22	2.07	2.33	1.11	2.64	4.6	1	0.55	0.65	1.7	2.61	0.68	1.72	0.25	0.17	0.89
XM_028854044.2	LOC114680873	zinc finger protein 14-like (LOC114680873), mRNA	0	0	0.05	0	0	0	0	0	0	0	0	0	0	0	0	0	0	0	0	0
XM_028854045.2	Add2	adducin 2 (Add2), transcript variant X1, mRNA	0	0	0	0	0	0	0	0	0	0	0	0	0	0	0	0	0	0	0	0
XM_028854049.2	LOC114680875	olfactory receptor 10H2-like (LOC114680875), mRNA	0	0	0	0	0	0	0	0	0	0	0	0	0	0	0	0	0	0	0	0
XM_028854050.2	LOC114680877	zinc finger protein 136-like (LOC114680877), mRNA	5.57	12.5	6.93	3.99	7.86	4.62	4.74	2.61	5.06	9.16	3.3	5.98	4.39	9.51	7.83	2.04	2.59	0.53	0.44	5.78
XM_028854051.2	Cnksr3	CNKSR family member 3 (Cnksr3), mRNA	0.99	1.01	0.95	1.07	0.82	0.33	1.08	0.72	0.68	1.73	0.19	0.14	0.23	0.26	0.32	0.49	0.66	0.1	0.03	0.28
XM_028854052.2	LOC114680880	pre-mRNA-splicing factor ISY1 homolog (LOC114680880), mRNA	14.46	18.81	12.95	10.73	11.22	12.93	17.91	9.81	12.44	20.6	9.44	10	7.75	16.1	11.24	11.85	21.75	5.01	1.28	7.86
XM_028854054.2	Ipcef1	interaction protein for cytohesin exchange factors 1 (Ipcef1), transcript variant X1, mRNA	0.25	0.31	0	0	0	0	0	0	0	0.47	0	0	0	0	0	0	0	0	0	0
XM_028854055.2	Ipcef1	interaction protein for cytohesin exchange factors 1 (Ipcef1), transcript variant X2, mRNA	7.96	13.59	7.64	7.17	8.65	10.42	10.45	6.03	8.69	18.38	6.97	14.6	8.2	15.9	10.73	3.47	3.33	1.6	0.82	17.66
XM_028854057.2	Ipcef1	interaction protein for cytohesin exchange factors 1 (Ipcef1), transcript variant X3, mRNA	2.41	0	0.27	0	0	0	0	0	0	0	0.51	0	0	0	0	0	0.2	0	0	0
XM_028854060.2	Ddx18	DEAD-box helicase 18 (Ddx18), mRNA	16.26	19.74	10.89	13.42	13.12	11.81	16.07	11.78	12.11	22.16	12.04	7.71	5.46	18.66	16.69	17.88	28.19	3.33	2.06	7.24
XM_028854061.2	Tiam2	TIAM Rac1 associated GEF 2 (Tiam2), transcript variant X1, mRNA	0.95	0.48	0.69	0.81	0.67	1.49	1.17	1.66	0.71	2.14	1.78	3.24	1.73	6.38	1.87	0.93	1.05	0.2	0.21	5.39
XM_028854063.2	Rab43	RAB43, member RAS oncogene family (Rab43), mRNA	15.74	26.84	27.27	19.19	20.5	24.51	20.51	15.66	18.71	37.8	22.31	24.52	22.62	31.01	13.77	16.05	18.63	10.42	4.3	20.24
XM_028854064.2	Tiam2	TIAM Rac1 associated GEF 2 (Tiam2), transcript variant X2, mRNA	0	0.5	0	0	0.27	0	0	0.22	0	0.11	0.26	0.09	0	0	0.17	0	0	0	0	0.24
XM_028854065.2	Tiam2	TIAM Rac1 associated GEF 2 (Tiam2), transcript variant X3, mRNA	0	0	2.52	0	0	0	0	0	0	0	0	1.59	0	0	0	0	0	0	0	5.61
XM_028854066.2	Tiam2	TIAM Rac1 associated GEF 2 (Tiam2), transcript variant X4, mRNA	0	0.32	0	0	0.73	0	0	0	0	0	0.64	0.19	0	0.21	0	0	0	0	0	0.78
XM_028854067.2	Tiam2	TIAM Rac1 associated GEF 2 (Tiam2), transcript variant X5, mRNA	2.69	2.4	0.06	2.46	1.53	5.17	3.26	9.26	1.95	5.46	7.36	9.83	7.11	26.49	8.81	2.92	2.61	1.18	0	15.19
XM_028854068.2	Tiam2	TIAM Rac1 associated GEF 2 (Tiam2), transcript variant X6, mRNA	0.28	0	0	0	0	0	0	0	0	0.25	0	0.41	0	0.31	0	0	0	0	0.62	1.84
XM_028854069.2	Tfb1m	transcription factor B1, mitochondrial (Tfb1m), mRNA	0.56	1.9	0.94	0.87	1.37	1	1.33	1.04	1.32	1.62	1.11	0.81	0.45	1.47	1.42	0.97	2.12	0.1	0.05	0.43
XM_028854070.2	Cldn20	claudin 20 (Cldn20), mRNA	0.04	0.21	0.02	0	0.05	0.06	0.16	0	0	0	0.19	0.13	0	0.09	0	0	0	0	0	0.06
XM_028854073.2	Gja8	gap junction protein alpha 8 (Gja8), mRNA	0	0	0	0	0	0	0	0	0	0	0	0	0	0	0	0	0	0	0	0
XM_028854074.2	LOC114680897	CCHC-type zinc finger nucleic acid binding protein (LOC114680897), transcript variant X2, mRNA	72.14	71.36	130.11	72.88	95.32	103.99	56.37	51.5	95.31	86.89	54.29	63.17	82.42	47.39	84.86	48.92	69.05	73.78	60.79	29.9
XM_028854075.2	Chd1l	chromodomain helicase DNA binding protein 1 like (Chd1l), mRNA	3.36	4.5	4.07	2.24	2.37	3.49	3.72	1.81	3.03	7.64	1.39	2.25	1.24	5.13	3.04	1.64	1.63	1.02	0.37	1.98
XM_028854076.2	Fmo5	flavin containing dimethylaniline monoxygenase 5 (Fmo5), transcript variant X1, mRNA	0.6	1.13	0.61	0.86	0.4	1.72	1.51	0.71	0.68	2.13	0.57	0.47	0.03	1.08	0.3	0.26	0.19	0	0	0.31
XM_028854078.1	LOC114680903	olfactory receptor-like protein COR9 (LOC114680903), mRNA	0	0	0	0	0	0	0	0	0	0	0	0	0	0	0	0	0	0	0	0
XM_028854079.1	LOC114680904	olfactory receptor 5V1-like (LOC114680904), mRNA	0	0	0	0	0	0	0	0	0	0	0	0	0	0	0	0	0	0	0	0
XM_028854080.2	LOC114680905	olfactory receptor 5V1-like (LOC114680905), mRNA	0	0	0	0	0	0	0	0	0	0	0	0	0	0	0	0	0	0	0	0
XM_028854081.1	LOC114680897	CCHC-type zinc finger nucleic acid binding protein (LOC114680897), transcript variant X3, mRNA	166.25	178.03	227.53	189.57	223.96	298.9	118.18	90.8	197.46	204.67	130.62	122.79	142.52	98.14	208.25	114.43	134.06	141.01	158.28	73.43
XM_028854082.2	LOC114680908	uncharacterized LOC114680908 (LOC114680908), mRNA	1.69	4.07	2.29	2.06	2.18	3.56	3.64	1.46	2.59	3.43	1.13	1.41	1.1	3.44	2.22	1.38	1.44	0.32	0.31	3.45
XM_028854083.2	LOC114680909	myomegalin-like (LOC114680909), mRNA	1.78	3.28	2.38	1.66	3.61	2.78	2.78	1.24	1.92	3.01	1.27	1.04	0.84	2.67	1.83	1.15	1.71	0.37	0.18	1.86
XM_028854084.2	LOC114680910	Golgi pH regulator (LOC114680910), transcript variant X1, mRNA	6.85	12.23	6.76	4.5	6.42	6.05	7.66	6.11	5.94	11.94	4.33	3.09	2.34	6.11	8.09	5.15	7.88	2.63	0.48	4.18
XM_028854086.2	LOC114680910	Golgi pH regulator (LOC114680910), transcript variant X3, mRNA	2.41	1.4	0.98	0.53	0.84	1.35	2.6	1.99	2.55	2.67	0	0.38	1.6	0.98	0.81	0.32	0.27	0.03	0.56	0.57
XM_028854087.2	Pdzk1	PDZ domain containing 1 (Pdzk1), mRNA	0.27	0.79	0.89	1.2	0.26	0.2	2.21	0.51	0.27	0.4	0.52	0.12	0.1	0.27	0.32	0.09	0.15	0.14	0	0.2
XM_028854088.2	LOC114680897	CCHC-type zinc finger nucleic acid binding protein (LOC114680897), transcript variant X5, mRNA	53.09	55.58	97.17	64.41	73.62	85.37	39.08	34.69	65.98	58.12	31.6	46.79	54.84	38.78	73.66	32.93	44.6	50.66	44.72	23.72
XM_028854089.2	Lix1l	limb and CNS expressed 1 like (Lix1l), transcript variant X1, mRNA	1.46	3.24	2.47	1.77	3.29	2.6	2.67	1.5	1.62	5.09	0.95	0.86	1.08	2.16	1.59	1.87	0.8	0.47	0	0.81
XM_028854090.2	Lix1l	limb and CNS expressed 1 like (Lix1l), transcript variant X2, mRNA	0.2	0.28	0.07	0.22	0	0.12	0	0.15	0.83	0.52	0.31	0.32	0.34	0	0.19	0	0.21	0	0.05	0.07
XM_028854091.2	Prkab2	protein kinase AMP-activated non-catalytic subunit beta 2 (Prkab2), transcript variant X1, mRNA	0.64	3.01	0.89	2.77	3.2	1.25	1.84	0	2.57	6.03	1.04	2.98	3.11	5.2	0.91	1.77	1.14	0	0	4.42
XM_028854092.2	Ankrd34a	ankyrin repeat domain 34A (Ankrd34a), transcript variant X1, mRNA	0	0.07	0.21	0	0	0	0	0	0	0	0	0	0	0	0	0	0	0	0	0
XM_028854093.2	Ankrd34a	ankyrin repeat domain 34A (Ankrd34a), transcript variant X2, mRNA	0.07	0	0	0.06	0.13	0	0.07	0	0	0.22	0.04	0.05	0	0.04	0.05	0.02	0.02	0	0	0
XM_028854094.2	Ankrd34a	ankyrin repeat domain 34A (Ankrd34a), transcript variant X3, mRNA	0	0.02	0	0	0	0	0	0	0	0.07	0	0	0	0	0	0	0	0	0	0
XM_028854095.2	Polr3gl	RNA polymerase III subunit GL (Polr3gl), transcript variant X1, mRNA	10.53	11.78	11.78	7.77	11.56	8.93	9.54	7.42	12.67	19.12	10.8	11.69	7.71	12.96	14.05	6.21	8.9	5.92	2.64	12.43
XM_028854096.2	Polr3gl	RNA polymerase III subunit GL (Polr3gl), transcript variant X2, mRNA	4.92	0.92	0.35	1.8	1.47	2.41	2.74	3.25	4.06	3.2	4.09	0.21	2.21	2.17	3.55	1.62	0.24	1.84	0.42	0.64
XM_028854097.2	Polr3gl	RNA polymerase III subunit GL (Polr3gl), transcript variant X4, mRNA	8.26	5.88	5.48	5.26	3.9	3.79	5.6	4.2	3.68	9.21	7.41	4.25	6.48	10.7	8.44	2.27	2.72	1.09	1.04	4.73
XM_028854098.1	LOC114680897	CCHC-type zinc finger nucleic acid binding protein (LOC114680897), transcript variant X6, mRNA	122.65	140	185.96	130.34	164.83	269.23	77.28	72.13	143.03	150.02	108.51	89.86	118.98	70.75	169.39	92.01	131.07	128.27	130.55	53.8
XM_028854099.2	Itga10	integrin subunit alpha 10 (Itga10), mRNA	0	0.73	0.28	0.47	0.23	0.47	0.38	0	0.05	0.24	0.01	0.27	0.02	0.28	0.03	0.03	0.08	0.02	0	0.04
XM_028854100.2	Pex11b	peroxisomal biogenesis factor 11 beta (Pex11b), transcript variant X1, mRNA	3.72	7.47	5.01	4.34	5.33	5.67	6.81	5.17	4.93	10.29	2.99	1.2	1.44	2.78	4.31	4.65	5.06	0.29	0	2.8
XM_028854101.2	LOC114680918	thioredoxin interacting protein (LOC114680918), mRNA	215.02	234.29	171.69	172.56	197.18	157.71	209.79	166.22	196.83	268.3	166.13	181.68	120.52	250.18	151.28	73.58	109.24	46.09	15.13	157.99
XM_028854102.2	Acp6	acid phosphatase 6, lysophosphatidic (Acp6), mRNA	5.57	5.26	2.87	3.07	2.44	5.01	5.92	3.08	3.13	4.61	2.48	0.71	0.87	3.01	3.76	2.31	1.91	0.6	0.23	0.83
XM_028854104.2	Cd160	CD160 molecule (Cd160), transcript variant X2, mRNA	2.23	2.44	1.9	2.37	1.2	1.8	4.52	1.58	1.03	4.6	3.38	1.14	1.11	2.41	3.31	0.2	0	1.29	0.33	0.9
XM_028854105.2	LOC114680921	vesicle-trafficking protein SEC22b (LOC114680921), mRNA	7.24	11.15	5.29	5.2	6.58	6.64	7.13	7.72	6.63	10.94	7.82	7.86	6.12	10.2	6.67	9.21	11.98	1.88	1.35	10.52
XM_028854107.2	Rbm8a	RNA binding motif protein 8A (Rbm8a), transcript variant X2, mRNA	20.97	20.07	19.92	16.66	15.04	20.46	25.77	17.37	19.87	25.82	13.9	14.13	7.75	18.74	19.07	18.83	24.26	2.61	2.03	16.15
XM_028854108.2	Rbm8a	RNA binding motif protein 8A (Rbm8a), transcript variant X3, mRNA	15.62	27.69	15.1	16.72	17.25	21.58	24.32	16.07	13.67	24.09	15.73	14.43	9.45	23.17	18.77	23.82	34.42	7.25	2.38	18.61
XM_028854109.2	Adgrl3	adhesion G protein-coupled receptor L3 (Adgrl3), transcript variant X28, mRNA	0	0.01	0.03	0	0.00632	0	0	0	0	0	0	0	0	0	0	0	0	0	0	0
XM_028854110.2	Copg1	COPI coat complex subunit gamma 1 (Copg1), mRNA	20.05	34.47	22.1	18.94	21.88	26.21	27.29	15.52	25.28	41.67	16.63	16.71	12.72	28.58	22.61	25.76	31.31	6.08	2.85	24.45
XM_028854111.2	Pias3	protein inhibitor of activated STAT 3 (Pias3), transcript variant X1, mRNA	0	1.56	1.02	0.46	1.04	1.32	0	0.69	1.25	2.16	0	0.52	0.52	0.86	0.8	0	0.42	1.05	0	0.3
XM_028854112.2	Pias3	protein inhibitor of activated STAT 3 (Pias3), transcript variant X3, mRNA	4.6	3.8	2.18	3.65	3.22	2.97	4.09	4.6	3.26	6.06	5.23	3.07	2.76	4.97	2.92	2.17	2.32	0	0.68	4.19
XM_028854113.2	Pias3	protein inhibitor of activated STAT 3 (Pias3), transcript variant X4, mRNA	0.69	0	0.59	0	0	0.75	1.24	0.31	0	0	0.95	0	0.25	1.17	0	0	0.58	0.11	0	1.72
XM_028854114.2	Pias3	protein inhibitor of activated STAT 3 (Pias3), transcript variant X5, mRNA	0.02	0.85	0.17	0.55	0.72	1.18	0.71	0.46	0.74	1.36	0.46	1.27	0.23	1.08	1.06	0.39	0	0	0.03	1.09
XM_028854115.2	Polr3c	RNA polymerase III subunit C (Polr3c), transcript variant X1, mRNA	13.47	9.22	1.09	4.41	5.14	5.81	5.61	9.96	12.3	9.96	7.88	0.26	5.75	1.35	11.05	7.3	5.2	1.19	1.08	2.62
XM_028854116.2	Polr3c	RNA polymerase III subunit C (Polr3c), transcript variant X2, mRNA	4.21	10.58	11.99	6.64	6.04	10.31	11.52	2.51	3.19	21.17	5.92	12.03	3.15	20.93	4.39	3.75	7.76	3.81	0.73	8.76
XM_028854117.2	Polr3c	RNA polymerase III subunit C (Polr3c), transcript variant X3, mRNA	0	1.86	0.42	1.71	1.05	1.12	1.74	0	0	0	0	0.49	0	0.29	0	0	1.07	0	0	2.13
XM_028854118.2	Rnf115	ring finger protein 115 (Rnf115), mRNA	37.83	44.29	27.79	24.03	30.19	38.07	31.77	26.27	29.74	49.02	29.47	32.58	19.07	42.57	34.68	19.61	26.44	7.9	3.87	38.96
XM_028854121.2	Gja5	gap junction protein alpha 5 (Gja5), transcript variant X1, mRNA	0.04	0.06	0.02	0	0	0	0.02	0	0.02	0.07	0	0	0	0	0.06	0	0	0	0	0
XM_028854122.2	Bcl9	BCL9 transcription coactivator (Bcl9), transcript variant X1, mRNA	0	0.11	0	0.26	0	0	0	0	0	0	0	0	0	0.12	0.24	0	0	0	0	0
XM_028854123.2	Bcl9	BCL9 transcription coactivator (Bcl9), transcript variant X2, mRNA	1.89	3.51	1.63	1.25	1.9	1.96	1.52	0.34	1.84	2.98	1.4	1.39	1.42	1.62	1.86	1.08	1.66	0	0	3.32
XM_028854125.2	Bcl9	BCL9 transcription coactivator (Bcl9), transcript variant X3, mRNA	0.29	0.53	0.16	0.21	0.22	0.9	0.66	0.62	0.61	0.84	0.51	1.9	0	1.94	0.82	0.27	0.78	0	0.24	2.11
XM_028854126.2	Bcl9	BCL9 transcription coactivator (Bcl9), transcript variant X4, mRNA	0	0.31	0	0	0.22	0.3	1.15	0.41	0.44	0	0	0.23	0.17	0.89	0	0	0.4	0.13	0	0.8
XM_028854127.2	Hmces	5-hydroxymethylcytosine binding, ES cell specific (Hmces), mRNA	24.78	25.73	12.34	17.24	18.9	15.48	32.28	17.28	13.98	30.58	11.37	4.9	5.91	11.07	27.56	10.9	7.1	3.59	2.71	7.42
XM_028854128.2	LOC114680954	dual specificity phosphatase 21-like (LOC114680954), mRNA	0	0	0	0	0	0	0	0	0	0	0	0	0	0	0	0	0	0	0	0
XM_028854129.2	Kdm6a	lysine demethylase 6A (Kdm6a), transcript variant X7, mRNA	0.56	0.25	0.68	0	0.03	0	0	0	0	0.04	0	0.35	0	0.01	0.12	0.13	0.14	0	0.19	0
XM_028854130.2	Kdm6a	lysine demethylase 6A (Kdm6a), transcript variant X9, mRNA	0.00807	1.73	0.56	0.4	1.1	0	0	0	0.17	0.68	0	0	0	0	0.93	0	0.34	0	0.12	0
XM_028854131.2	Kdm6a	lysine demethylase 6A (Kdm6a), transcript variant X10, mRNA	0.32	0.77	1	0.38	0.07	0	0.33	0	0.4	0.02	1.49	0.42	0	0	0	0	0	0	0	0
XM_028854132.2	Kdm6a	lysine demethylase 6A (Kdm6a), transcript variant X8, mRNA	0	0	0	0	0	0	0	0	0	0	0	0	0	0	0	0	0	0	0	0
XM_028854133.2	Kdm6a	lysine demethylase 6A (Kdm6a), transcript variant X11, mRNA	1.81	4.12	2.74	3.2	2.97	2.32	4.55	2.38	4.17	6.14	2.04	2.12	2.92	6.18	2.37	1.65	3.55	0.64	0.54	4.28
XM_028854134.2	Kdm6a	lysine demethylase 6A (Kdm6a), transcript variant X12, mRNA	3.93	4.4	1.97	0.63	2.44	3.63	0.47	1.39	0.34	2.19	0	2.62	1.01	1.12	2.88	1.39	1.61	0.41	0.05	3.42
XM_028854135.2	Kdm6a	lysine demethylase 6A (Kdm6a), transcript variant X13, mRNA	0.18	0.08	0	0.16	0	0	0	0	0	0	0	0.06	0	0	0	0	0	0	0	0
XM_028854137.2	Kdm6a	lysine demethylase 6A (Kdm6a), transcript variant X14, mRNA	0.00853	0	0	0.15	0.5	0	0.82	0	0.49	0.37	0	0	0	0.38	0.68	0.17	0	0	0	0.01
XM_028854139.2	Xrcc4	X-ray repair cross complementing 4 (Xrcc4), transcript variant X1, mRNA	4.99	4.76	4.42	2.68	4.18	3.36	3.51	3.78	4.25	4.86	3.75	5.94	1.9	5.19	5.15	2.21	1.82	1.17	0.84	4.58
XM_028854140.2	Rab7a	RAB7A, member RAS oncogene family (Rab7a), mRNA	73.36	93.31	62.06	61.32	68.67	95.69	92.07	67.92	76.24	125.57	88.18	120.46	69.19	155.92	89.55	91.82	115.49	24.8	12.07	132.18
XM_028854141.2	Xrcc4	X-ray repair cross complementing 4 (Xrcc4), transcript variant X2, mRNA	0.05	0.83	0.76	0.08	0.5	0.59	0.5	0.12	0.24	0.93	0.27	0.4	0.76	0.41	0.4	0.67	1.05	0.15	0	0.54
XM_028854142.2	Xrcc4	X-ray repair cross complementing 4 (Xrcc4), transcript variant X3, mRNA	0	0	0	0	0.25	0	0	0	0	0.06	0	0	0	0	0.28	0	0	0	0	0
XM_028854143.2	Xrcc4	X-ray repair cross complementing 4 (Xrcc4), transcript variant X4, mRNA	0.07	0.08	0	0	0.08	0	0.1	0	0	0	0.16	0	0	0	0	0	0	0	0	0
XM_028854145.2	Tmem167a	transmembrane protein 167A (Tmem167a), transcript variant X3, mRNA	15.02	21.72	14.9	8.85	13.35	11.2	12.94	7.86	8.15	15.97	8.12	8.88	5.06	14.08	14.82	9.12	12.85	2.46	1.38	9.41
XM_028854146.2	Hapln1	hyaluronan and proteoglycan link protein 1 (Hapln1), transcript variant X2, mRNA	0	0	0	0	0	0	0	0	0	0	0	0	0	0	0	0	0	0	0	0
XM_028854147.2	Hapln1	hyaluronan and proteoglycan link protein 1 (Hapln1), transcript variant X3, mRNA	0	0.03	0.08	0	0.04	0	0	0	0	0	0	0.03	0	0	0	0	0	0.01	0	0
XM_028854148.2	Hapln1	hyaluronan and proteoglycan link protein 1 (Hapln1), transcript variant X1, mRNA	0	0	0	0.01	0	0	0	0	0	0	0	0	0	0	0	0	0	0	0	0
XM_028854149.2	Vcan	versican (Vcan), transcript variant X1, mRNA	0.1	0.28	0.2	0.18	0.28	0.22	0.17	0	0.09	0.4	0.96	1.85	0.94	3.61	0.92	1.11	1.85	0.07	0.09	3.57
XM_028854151.2	Vcan	versican (Vcan), transcript variant X2, mRNA	3.48	5.33	7.37	5.91	6.96	12.62	5.1	4.42	5.27	24.2	21.28	19.29	9.03	74.49	10.88	30.58	49.55	2.07	0.89	60.45
XM_028854152.2	Vcan	versican (Vcan), transcript variant X3, mRNA	0	0	0.05	0.04	0	0.17	0	0	0	0.14	0.03	0	0	0.17	0.04	0.07	0.15	0	0	0.29
XM_028854153.2	LOC114680968	histone H1.10 (LOC114680968), mRNA	1.78	2.53	1.09	1.49	0.91	2.11	4.27	2.25	2.59	4.19	1.02	0.71	0.17	1.22	3.6	2.78	0.35	1.02	0.26	1.72
XM_028854155.2	Edil3	EGF like repeats and discoidin domains 3 (Edil3), transcript variant X1, mRNA	0.29	1.44	0.83	0.46	0.34	0.34	0.47	0.29	1.82	1.56	0.53	0.33	0.88	0.34	0.34	0	0	0	0	0
XM_028854156.2	Edil3	EGF like repeats and discoidin domains 3 (Edil3), transcript variant X2, mRNA	0	0	0	0.22	0.32	0.04	0	0	0.29	0.11	0.17	0	0.09	0.18	0	0.06	0.06	0.11	0.02	0.17
XM_028854157.2	Tango2	transport and golgi organization 2 homolog (Tango2), transcript variant X1, mRNA	0	0	0	0	0	0	0	0	0	0	0	0	0	0	0	0	0	0	0	0
XM_028854158.2	Tango2	transport and golgi organization 2 homolog (Tango2), transcript variant X2, mRNA	2.07	8.37	4.49	4.67	8.26	10.48	3.97	2.25	6.13	6.11	4.62	4.56	4.3	2.28	3.29	2.6	3.96	6.28	2.07	2.68
XM_028854159.2	Tango2	transport and golgi organization 2 homolog (Tango2), transcript variant X3, mRNA	10.73	20.86	18.07	22.81	23	12.95	14.13	12.85	13.62	25.32	18.91	10.9	13.25	12.52	22.55	10.55	11.17	9.31	7.31	7.5
XM_028854160.2	Tango2	transport and golgi organization 2 homolog (Tango2), transcript variant X5, mRNA	0	0	0.14	0	0	0	0	0	0	0	0	0	0	0	0	0	0	0	0	0
XM_028854161.2	Tango2	transport and golgi organization 2 homolog (Tango2), transcript variant X6, mRNA	2.41	1.34	0.79	2.05	0.47	1.45	0	0	0	1.2	0.64	1.13	0.44	0.26	0.32	0	0	0	0.76	0.15
XM_028854162.2	LOC114680978	uncharacterized LOC114680978 (LOC114680978), mRNA	16.51	18.19	12.96	4.06	7.16	5.61	4.88	7.55	10.95	9.76	4.78	6.87	6.25	12.02	17.77	2.83	2.91	6.25	3.14	11.58
XM_028854163.2	Adgrl3	adhesion G protein-coupled receptor L3 (Adgrl3), transcript variant X29, mRNA	0	0	0.01	0	0	0	0	0	0	0	0	0	0	0	0	0	0	0	0	0
XM_028854165.2	LOC114680986	homeobox protein goosecoid-2-like (LOC114680986), mRNA	0	0	0	0	0	0	0	0	0	0	0	0	0	0	0	0	0	0	0	0
XM_028854166.2	Zdhhc8	zinc finger DHHC-type palmitoyltransferase 8 (Zdhhc8), transcript variant X2, mRNA	0.66	0.57	0.3	0.44	0.28	0.29	0.47	0	0.84	0.54	0.07	0.09	0.09	0.68	0.53	0	0.16	0	0.16	0
XM_028854167.2	Zdhhc8	zinc finger DHHC-type palmitoyltransferase 8 (Zdhhc8), transcript variant X4, mRNA	2.14	2.7	2.18	1.82	1.31	1.92	2.81	1.83	1.65	4.03	1.5	0.45	0.75	1.55	1.72	0.83	0.78	0.6	0.23	0.56
XM_028854170.2	Ccdc188	coiled-coil domain containing 188 (Ccdc188), transcript variant X1, mRNA	0	0	0	0	0	0	0	0	0	0	0	0	0	0	0.18	0	0	0	0	0
XM_028854171.1	Rtn4r	reticulon 4 receptor (Rtn4r), mRNA	0	0	0.11	0.03	0	0	0.02	0	0	0	0	0	0	0	0	0	0.03	0	0	0
XM_028854172.2	Cdc45	cell division cycle 45 (Cdc45), mRNA	0.14	0.26	0.31	0.37	0.43	0.45	0.67	0.14	0.12	0.58	0.33	0.46	0.33	0.81	1.49	1.47	0.26	0.23	0.04	1.84
XM_028854173.2	Ufd1	ubiquitin recognition factor in ER associated degradation 1 (Ufd1), mRNA	18.02	21.91	14.4	15.81	15.7	17.6	21.03	15.8	15.9	27.92	15.86	15.15	10.92	22.12	20.25	22.83	30.85	8.99	3	16.82
XM_028854175.2	Septin5	septin 5 (Septin5), transcript variant X1, mRNA	0.56	1.54	0.63	2.6	0.43	1.5	1.97	1.4	1.59	1.99	2.97	11.85	5.65	11.4	4.37	9.36	3.09	0.56	1.84	18.94
XM_028854176.2	Septin5	septin 5 (Septin5), transcript variant X2, mRNA	2.76	3.27	2.24	0.46	3.32	7.64	2.96	2.54	4.67	3.2	2.55	8.25	4.64	6.07	5.61	4.39	2.39	1.63	0	10.21
XM_028854177.1	Gp1bb	glycoprotein Ib platelet subunit beta (Gp1bb), mRNA	4.19	6.24	1.76	4.33	2.45	6.37	14.23	9.31	12.48	6.59	3.65	5.87	6.49	6.76	0.68	7.79	0.83	4.66	4.1	13.68
XM_028854178.2	Gnb1l	G protein subunit beta 1 like (Gnb1l), mRNA	1.65	2.94	1.45	1.26	1.51	1.48	2.94	1.32	1.91	2.98	1.3	1.18	0.68	1.48	1.63	3.56	3.31	0.49	0.3	0.87
XM_028854179.2	Tbx1	T-box transcription factor 1 (Tbx1), mRNA	0.05	0	0.03	0.06	0.06	0.07	0.08	0	0	0.01	0.12	0	0.1	0.09	0.05	0	0	0	0	0.03
XM_028854180.2	Arvcf	ARVCF delta catenin family member (Arvcf), mRNA	4.06	4.3	3.26	3.8	4.07	4.78	5.51	3.98	4.01	6.49	2.55	1.49	1.43	3.73	3.15	2.88	3	1.1	0.72	2.04
XM_028854181.2	Txnrd2	thioredoxin reductase 2 (Txnrd2), transcript variant X1, mRNA	1.78	0.8	0.95	1.25	0.92	0.94	0.68	0	1.66	3.53	0.27	0.08	0.13	0.5	1.02	1.03	1.07	0	0.12	0.84
XM_028854182.2	Txnrd2	thioredoxin reductase 2 (Txnrd2), transcript variant X2, mRNA	1.01	1.54	0.38	0.88	0.23	1.1	1.16	0	0.14	0.46	0.59	0.2	0.03	0	0.2	0	0	0	0.18	0
XM_028854183.2	Txnrd2	thioredoxin reductase 2 (Txnrd2), transcript variant X3, mRNA	1.5	0.91	0.59	0.56	0.48	0.64	2.97	0.51	0.48	1.71	0.21	0.35	0.43	0.38	0.61	0.53	1.03	0.42	0	0.8
XM_028854184.2	Rpn1	ribophorin I (Rpn1), mRNA	52.81	64.14	42.54	43.79	52.61	71.93	72.73	46.5	52.28	110.42	43.46	44	29.33	72.72	52.91	63.09	85.85	14.55	6.26	67.27
XM_028854185.2	Txnrd2	thioredoxin reductase 2 (Txnrd2), transcript variant X4, mRNA	0	0	0	0	0.47	0	0.35	0	0	0.33	0.14	0	0.16	0.89	0.34	0.61	0.55	0	0	0.31
XM_028854186.2	LOC114681002	catechol O-methyltransferase-like (LOC114681002), mRNA	19.97	25.79	18.17	21.71	23.08	32.24	26.89	18.09	19	39.92	15.29	11.48	8.03	18.2	15.07	19.62	12.26	5.01	6.33	16.43
XM_028854187.2	LOC114681003	catechol O-methyltransferase-like (LOC114681003), transcript variant X1, mRNA	0	0	0	0	1.87	3.68	0	0	0	0	0	0	0	0	0	0	0	0.61	0	0
XM_028854188.2	LOC114681003	catechol O-methyltransferase-like (LOC114681003), transcript variant X2, mRNA	0	0	0	0	2.03	0	2.38	0	0	0	0.73	0	0.85	0.13	0	0	0	0	0	0
XM_028854189.2	LOC114681003	catechol O-methyltransferase-like (LOC114681003), transcript variant X3, mRNA	22.28	31.02	19.35	22.5	25.82	33.66	37.12	21.73	30.24	50.6	17.13	8.77	5.34	19.94	17.2	21.8	26.64	4.32	2.12	16.93
XM_028854191.2	LOC114681004	catechol O-methyltransferase-like (LOC114681004), transcript variant X4, mRNA	3.11	2.8	2.56	3.58	4.33	4.13	6.85	2.24	1.73	5.32	3.01	0.47	0.4	1.75	0.94	2.85	2.99	0.84	0.23	4.55
XM_028854192.2	Comt	catechol O-methyltransferase-like (LOC114681004), transcript variant X5, mRNA	4.09	9.16	6.45	3.26	6.25	11.97	5.56	7.87	5.98	10.12	1.38	0.86	0.61	1.94	1.47	5.44	6.88	0	0	3.66
XM_028854193.1	C12H22orf39	chromosome 12 C22orf39 homolog (C12H22orf39), mRNA	4.29	4.39	2.99	2.97	3.06	3.26	3.42	1.8	2.33	5.83	2.06	1.04	0.94	2.36	1.49	0.95	2.78	0.6	0.3	0.87
XM_028854194.2	Cldn5	claudin 5 (Cldn5), mRNA	0.27	0.42	0.46	0.27	0.95	0.13	0.56	0.6	1.02	0.56	0.04	0.44	0.23	0.07	0.88	2.05	3.13	0.2	0.07	1.3
XM_028854195.2	Gata2	GATA binding protein 2 (Gata2), transcript variant X1, mRNA	0.96	6.06	1.31	1.74	1.94	2.69	3.97	3.35	4.85	5.51	4.46	6.48	2.93	8.55	2.76	1.93	2.21	1.65	0	3.22
XM_028854196.2	LOC114681010	protein HIRA (LOC114681010), transcript variant X1, mRNA	3.52	5.12	3.41	1.4	2.17	2.18	3.36	2.74	1.94	4.89	0.71	1.61	0.79	3.04	2.7	2.29	1.9	0.58	0.34	2.85
XM_028854198.2	LOC114681010	protein HIRA (LOC114681010), transcript variant X2, mRNA	0	0.35	0.35	0	1.24	0	0.82	0	1.2	0.55	0	0.68	0.53	0.24	0.71	0	0.25	0	0.26	0.29
XM_028854199.2	Hira	protein HIRA (LOC114681010), transcript variant X4, mRNA	0	0	0.01	0.01	0	0	0.04	0	0	0	0	0	0.02	0	0	0	0.02	0	0	0
XM_028854200.2	LOC114681010	protein HIRA (LOC114681010), transcript variant X5, mRNA	0.98	2.6	1.67	1.16	1.2	1.04	2.55	1.31	2.4	3.09	0.44	0	0.57	4.68	1.41	1.36	0.74	0.45	0.55	1.14
XM_028854201.2	Mrpl40	mitochondrial ribosomal protein L40 (Mrpl40), mRNA	10.56	13.06	7.38	8.01	9.68	12.36	13.36	8.25	11.7	15.34	7.83	5.55	3.94	8.26	6.55	10.83	11.04	2.85	0.85	8.28
XM_028854202.2	Dgcr8	DGCR8 microprocessor complex subunit (Dgcr8), transcript variant X1, mRNA	0	0	0	0	0	0	0	0	0	0	0	0	0	0	0	0	0	0	0	0
XM_028854210.2	Eefsec	eukaryotic elongation factor, selenocysteine-tRNA specific (Eefsec), transcript variant X1, mRNA	3.44	5.84	3.25	2.41	3.28	2.31	4.3	2.14	2.66	5.48	1.83	1.03	1.2	2.48	3.12	3.35	5.43	1.03	0.19	1.26
XM_028854212.2	Dgcr8	DGCR8 microprocessor complex subunit (Dgcr8), transcript variant X10, mRNA	11.06	10.79	5.72	6.52	6.08	7.87	9.84	5.29	7.83	12.72	5.08	3.47	3.49	9	10.09	5.13	5.57	1.34	0.86	4.51
XM_028854213.2	Dgcr8	DGCR8 microprocessor complex subunit (Dgcr8), transcript variant X6, mRNA	0	0	0	0	0	0	0	0	0	0	0	0	0	0	0	0	0	0	0	0.52
XM_028854217.2	Trmt2a	tRNA methyltransferase 2 homolog A (Trmt2a), transcript variant X1, mRNA	7.97	14.45	5.66	5.11	5.09	5.57	10.87	5.5	7.8	12.9	5.17	3.01	2.37	8.42	10.31	7.2	9.67	1.09	0.44	5.08
XM_028854218.2	Ranbp1	RAN binding protein 1 (Ranbp1), transcript variant X2, mRNA	14.04	16.8	9.11	12.1	11.11	13.81	26.56	13.49	13.37	22.79	15.05	9.44	6.77	18.62	21.78	38.33	55.9	9.34	3.82	19.77
XM_028854219.2	LOC114681016	cyclin-I-like (LOC114681016), mRNA	0.33	141.64	21.4	76.55	52.74	23.67	29.3	0.07	0.14	36.69	34.99	0.11	0.06	43.89	0.25	9.42	0.12	0.1	0.07	22.88
XM_028854220.2	CXHXorf66	chromosome X CXorf66 homolog (CXHXorf66), mRNA	0	0	0	0	0	0	0	0	0	0	0	0	0	0	0	0	0	0	0	0
XM_028854221.2	Mcf2	MCF.2 cell line derived transforming sequence (Mcf2), transcript variant X5, mRNA	0	0	0.03	0	0	0	0	0.02	0	0	0	0	0	0	0.03	0	0.03	0	0	0
XM_028854227.2	Mcf2	MCF.2 cell line derived transforming sequence (Mcf2), transcript variant X1, mRNA	0	0	0	0	0.07	0	0	0	0	0	0	0	0	0	0	0	0	0	0	0
XM_028854228.2	Fgf13	fibroblast growth factor 13 (Fgf13), transcript variant X1, mRNA	0	0	0.15	0	0.17	0	0	0	0	0	0	0	0	0	0	0	0.04	0	0	0
XM_028854229.2	Fgf13	fibroblast growth factor 13 (Fgf13), transcript variant X2, mRNA	0	0.08	0	0	0	0	0	0	0	0	0	0	0	0	0	0	0	0	0	0
XM_028854230.2	Fgf13	fibroblast growth factor 13 (Fgf13), transcript variant X3, mRNA	0	0.35	0.47	0.13	0.45	0.16	0	0.13	0	0.16	0	0	0.15	0	0.11	0	0	0.1	0.09	0
XM_028854231.2	Fgf13	fibroblast growth factor 13 (Fgf13), transcript variant X4, mRNA	0	0	0	0	0	0	0	0	0	0	0	0	0	0	0	0	0	0	0	0
XM_028854232.2	F9	coagulation factor IX (F9), mRNA	1.17	1.7	1.15	1.09	1.53	1.41	1.22	1	1.5	3.01	2.18	2.45	0.96	1.86	1.52	1.22	1.15	0.5	0.07	1.54
XM_028854233.2	Ruvbl1	RuvB like AAA ATPase 1 (Ruvbl1), mRNA	14.15	20.82	10.68	11.58	13.11	15.84	19.96	12.18	13.94	22.3	11.12	6.15	4.59	12.99	13.93	15.04	24.23	4.26	1.81	6.45
XM_028854234.2	Atp11c	ATPase phospholipid transporting 11C (Atp11c), transcript variant X1, mRNA	0	0	0	0	0	0	0	0	0	0	0	0	0	0	0	0	0	0	0	0
XM_028854235.2	Atp11c	ATPase phospholipid transporting 11C (Atp11c), transcript variant X2, mRNA	0	0	0	0	0	0	0	0	0	0	0	0	0	0	0.07	0	0	0	0	0.08
XM_028854236.2	Atp11c	ATPase phospholipid transporting 11C (Atp11c), transcript variant X4, mRNA	0	0	0	0	0	0	0	0	0	0	0	0	0	0	0	0	0	0	0	0
XM_028854237.2	Atp11c	ATPase phospholipid transporting 11C (Atp11c), transcript variant X5, mRNA	0	0	0	0	0	0	0	0	0	0	0	0	0	0	0	0	0	0	0	0
XM_028854238.2	Atp11c	ATPase phospholipid transporting 11C (Atp11c), transcript variant X7, mRNA	0	0	0	0.14	0	0	0	0.08	0	0	0.01	0	0	0	0	0.07	0	0	0	0
XM_028854239.2	Atp11c	ATPase phospholipid transporting 11C (Atp11c), transcript variant X6, mRNA	0.05	0	0.03	0	0.11	0	0.02	0	0.42	0	0	0	0	0.19	0	0	0	0	0	0.03
XM_028854240.2	Atp11c	ATPase phospholipid transporting 11C (Atp11c), transcript variant X8, mRNA	0	0	0	0	0.15	0	0	0	0	0	0	0	0	0	0	0.02	0.09	0	0	0
XM_028854241.2	Atp11c	ATPase phospholipid transporting 11C (Atp11c), transcript variant X9, mRNA	0	0.63	0.25	0.34	0.41	0.16	0	0	0	0.37	0.29	0.65	0	0.45	0.48	0.24	1.06	0	0	0.18
XM_028854242.2	Atp11c	ATPase phospholipid transporting 11C (Atp11c), transcript variant X10, mRNA	0	0	0.22	0	0.18	0	0	0	0	0.12	0	0	0	0	0.13	0	0.16	0	0	0.21
XM_028854243.2	Atp11c	ATPase phospholipid transporting 11C (Atp11c), transcript variant X11, mRNA	1.73	2.53	1.64	0.78	1.43	1.25	1.39	0.63	1.18	1.16	0.24	0.41	0.51	1.32	2.37	0.76	1.81	0.11	0.17	1.66
XM_028854244.2	Elmo3	engulfment and cell motility 3 (Elmo3), transcript variant X1, mRNA	1.53	1.18	1.26	0.78	1.11	1.65	1.83	0.96	1.35	2.42	1.1	0.84	0.82	2.43	1.31	0.72	0.89	0.56	0.18	1.49
XM_028854245.2	Lrrc29	leucine rich repeat containing 29 (Lrrc29), transcript variant X1, mRNA	0	0.1	0	0	0	0	0	0	0	0	0	0	0	0	0	0	0	0	0	0
XM_028854246.2	Sec61a1	SEC61 translocon subunit alpha 1 (Sec61a1), mRNA	24.43	36.68	23.17	23.69	24.8	34.39	35.79	22.37	23.59	54.93	33.1	43.21	24.72	68.78	39.25	58.31	82.41	9.93	3.99	56.16
XM_028854247.2	Lrrc29	leucine rich repeat containing 29 (Lrrc29), transcript variant X3, mRNA	0	0.33	0.24	0.18	0.27	0.34	0	0.24	0.56	0	0.4	0.04	0.14	1.01	0.33	0	0	0	0	0.35
XM_028854248.2	Lrrc29	leucine rich repeat containing 29 (Lrrc29), transcript variant X4, mRNA	0.19	0.65	0.17	0.65	0.24	0.6	0.54	0.24	0.21	1.09	0.17	0.26	0.17	0.17	0	0.35	0.42	0.08	0	0
XM_028854249.2	Lrrc29	leucine rich repeat containing 29 (Lrrc29), transcript variant X5, mRNA	0.18	0.27	0	0	0	0.06	0.18	0	0.42	0.73	0.12	0.19	0	0.28	0.03	0.1	0.05	0	0.19	0.32
XM_028854250.2	Lrrc29	leucine rich repeat containing 29 (Lrrc29), transcript variant X6, mRNA	0	0	0	0	0	0.06	0.09	0.15	0	0	0.1	0	0	0	0.08	0	0	0	0	0.09
XM_028854251.2	Lrrc29	leucine rich repeat containing 29 (Lrrc29), transcript variant X9, mRNA	0	0	0	0.06	0	0	0.22	0	0	0.17	0	0.06	0	0	0.03	0.05	0	0	0	0.3
XM_028854252.2	E2f4	E2F transcription factor 4 (E2f4), mRNA	30.97	41.34	23.03	24.67	23.44	30.53	40.1	24.14	28.74	50.72	30.49	32.38	19.57	42.25	32.09	34.45	34.78	9.34	3.53	45.73
XM_028854253.2	LOC114681034	agouti related neuropeptide (LOC114681034), mRNA	0.1	0	0	0	0	0	0	0	0	0	0	0	0	0	0	0	0	0	0	0
XM_028854255.2	Nfatc3	nuclear factor of activated T cells 3 (Nfatc3), transcript variant X1, mRNA	20.07	22.06	16.83	9.87	13.87	15.77	14.59	10.52	15.38	28.13	8.31	12.86	7.08	15.29	21.79	5.87	7.26	2.37	1.24	15.82
XM_028854256.2	Nfatc3	nuclear factor of activated T cells 3 (Nfatc3), transcript variant X2, mRNA	0.58	1.07	1.51	0.69	0.9	1.14	0.83	0.08	1.26	1.62	0.19	1.66	0.09	0.98	1.03	0.37	0.47	0.09	0.07	1.23
XM_028854257.2	Esrp2	epithelial splicing regulatory protein 2 (Esrp2), transcript variant X1, mRNA	0.06	0.06	0	0.06	0.19	0.08	0.15	0.08	0.07	0	0	0.03	0.02	0	0.26	0.02	0.03	0	0	0.06
XM_028854258.2	Esrp2	epithelial splicing regulatory protein 2 (Esrp2), transcript variant X2, mRNA	0.11	0.12	0	0.1	0	0.17	0.16	0.13	0.02	0	0	0.05	0.03	0	0.25	0.05	0	0	0	0.06
XM_028854259.2	Esrp2	epithelial splicing regulatory protein 2 (Esrp2), transcript variant X3, mRNA	0	0	0.23	0	0	0	0	0	0	0.35	0.18	0	0	0.24	0	0	0	0	0	0
XM_028854260.2	Kbtbd12	kelch repeat and BTB domain containing 12 (Kbtbd12), mRNA	0	0	0	0	0.06	0	0.00975	0	0	0.01	0	0.03	0	0	0.01	0.01	0	0.01	0	0.01
XM_028854261.2	Ranbp10	RAN binding protein 10 (Ranbp10), transcript variant X2, mRNA	51.46	89.43	200.86	189.64	170.51	272.75	69.89	45.43	104.26	238.21	112	86.47	106.02	56.54	148.7	84.32	83.17	76.03	87.81	45.34
XM_028854262.2	Atp6v0d1	ATPase H+ transporting V0 subunit d1 (Atp6v0d1), mRNA	45.04	46.76	39.33	44.68	43.04	77.43	63.7	52	42.53	90.25	65.26	56.59	38.85	109.65	47.02	70.78	80.44	18.31	5.63	115.4
XM_028854263.2	Edc4	enhancer of mRNA decapping 4 (Edc4), transcript variant X1, mRNA	7.77	11.17	4.9	6.15	5.65	5.59	8.1	6.89	7.65	10.7	6.18	3.94	3.44	9.81	6.97	4.64	4.93	0.72	1.46	6.72
XM_028854264.2	Edc4	enhancer of mRNA decapping 4 (Edc4), transcript variant X2, mRNA	4.32	8.37	3.68	3.73	3.86	5.15	7.28	1.58	3.8	9.47	1.97	4.89	4.05	3.85	4.77	3.4	3.96	1.84	0	3.7
XM_028854265.2	Edc4	enhancer of mRNA decapping 4 (Edc4), transcript variant X3, mRNA	0.51	0.64	0.73	0	0.81	1.54	0.27	2.37	0.67	1.63	1.58	0.86	0	3.52	0.63	0	0.62	0	0	1.19
XM_028854267.2	Nrn1l	neuritin 1 like (Nrn1l), transcript variant X1, mRNA	0.02	0.41	0	0.33	0	0.15	0.32	0.41	0.31	0.22	0.13	0.25	0.14	0.56	0.72	0	0.16	0	0.06	0.06
XM_028854268.2	Nutf2	nuclear transport factor 2 (Nutf2), transcript variant X1, mRNA	11.87	16.23	9.38	8.73	8.56	9.92	13.61	10.36	9.43	14.72	8.44	4.85	3.52	8.96	14.73	12.53	19.24	3.41	2.17	6.65
XM_028854269.2	Nutf2	nuclear transport factor 2 (Nutf2), transcript variant X3, mRNA	0.2	0.09	0.05	0.19	1.07	0.17	0.53	0.55	0.28	0.38	0	0.13	0.11	0.77	0.5	0.24	0.57	0	0	0.29
XM_028854270.2	Nutf2	nuclear transport factor 2 (Nutf2), transcript variant X2, mRNA	2.02	2.22	0.71	1.54	0.96	1.18	2.09	0.95	0.86	2.75	0.92	0.75	0.32	1.9	1.03	4.96	4.25	0	0.11	1.42
XM_028854271.2	Phaf1	chromosome 5 C16orf70 homolog (C5H16orf70), mRNA	9.9	10.71	6.95	8.15	9.33	12.85	12.14	9.44	8.38	16.38	15.1	10.2	9.28	26.07	9.21	5.47	6.64	1.85	0.9	14.34
XM_028854273.2	Mgll	monoglyceride lipase (Mgll), transcript variant X3, mRNA	10.52	25.41	8.12	14.51	12.82	12.94	31.77	15.69	19.21	22.38	9.95	10.1	10.91	12.04	6.76	13.84	4.83	5.78	4.67	22.11
XM_028854274.2	B3gnt9	UDP-GlcNAc:betaGal beta-1,3-N-acetylglucosaminyltransferase 9 (B3gnt9), mRNA	0.09	0.3	0.06	0.19	0.2	0.11	0.35	0.14	0.13	0.3	0.38	0.1	0.06	0.35	0.1	0.09	0.16	0.09	0.03	0.2
XM_028854275.2	Zdhhc1	zinc finger DHHC-type containing 1 (Zdhhc1), transcript variant X1, mRNA	0.01	0.5	0.4	0	0.14	0	0	0	0	0.88	0	0	0	0	0	0.26	0.77	0	0	0
XM_028854276.2	Zdhhc1	zinc finger DHHC-type containing 1 (Zdhhc1), transcript variant X2, mRNA	0.44	0.13	0.49	0.63	0.39	0.74	0.52	0	0.32	0.22	0	0.18	0.18	0.03	1.26	0.33	1.01	0	0	0
XM_028854277.2	Zdhhc1	zinc finger DHHC-type containing 1 (Zdhhc1), transcript variant X5, mRNA	0.24	0.21	0	0	0.36	0	0	0	0	0.12	0	0	0	0	0.08	0.45	0	0	0	0
XM_028854278.2	Zdhhc1	zinc finger DHHC-type containing 1 (Zdhhc1), transcript variant X6, mRNA	0	0	0.13	0	0	0.37	0.12	0.49	0.38	0.11	0.24	0	0	0.23	0	0.45	0.15	0	0	0.23
XM_028854279.2	Tppp3	tubulin polymerization promoting protein family member 3 (Tppp3), transcript variant X1, mRNA	5.22	5.75	3.62	11.16	21.8	10.61	7.06	6.24	19.96	11.79	10.28	3.39	1.01	1.38	6.03	32.21	187.45	2.77	0.27	5.15
XM_028854280.2	Tppp3	tubulin polymerization promoting protein family member 3 (Tppp3), transcript variant X2, mRNA	0.31	0	0.05	0.38	0.19	0.69	0	0	0.6	1.14	0	0	0	0.06	0.31	0.42	3.22	0	0	0
XM_028854281.2	Tmem208	transmembrane protein 208 (Tmem208), transcript variant X1, mRNA	7.33	6.2	5.36	6.29	6.95	7.72	7.09	4.14	6.3	9.09	10.66	10.02	3.18	12.71	12.75	14.5	15.87	2.83	1.04	6.72
XM_028854282.2	Polr2b	RNA polymerase II subunit B (Polr2b), mRNA	22.68	31.6	17.97	17.32	19.09	21.1	24.35	16.11	20.97	33.34	16.26	18.01	12.34	27.18	21.02	13.78	18.44	5.16	2.13	20.3
XM_028854285.2	Fhod1	formin homology 2 domain containing 1 (Fhod1), mRNA	10.41	12.83	6.29	9.14	7.44	12.82	13.44	9.47	9.56	19.77	8.05	6.86	6.27	12.13	6.93	3.83	2.95	2.26	1.3	8.96
XM_028854286.2	Slc9a5	solute carrier family 9 member A5 (Slc9a5), transcript variant X1, mRNA	0.09	0.05	0.2	0.06	0	0	0.07	0	0	0.03	0	0	0.01	0.21	0.01	0	0.31	0	0	0.05
XM_028854288.2	Slc9a5	solute carrier family 9 member A5 (Slc9a5), transcript variant X3, mRNA	0.1	0	0	0.03	0.1	0.07	0.03	0.02	0.09	0.45	0	0.09	0	0	0.17	0	0	0.03	0	0.04
XM_028854289.2	Slc12a4	solute carrier family 12 member 4 (Slc12a4), transcript variant X1, mRNA	0.4	2.48	0.03	0.03	0	0	0	0	0.04	1.65	0	0	0	1.46	0	0	0	0	0	0
XM_028854290.2	Slc12a4	solute carrier family 12 member 4 (Slc12a4), transcript variant X2, mRNA	0	0	0	1.08	0	0.25	0	0	0	0.48	0	0.11	0	0	0.5	0	0.62	0	0	0
XM_028854291.2	Slc12a4	solute carrier family 12 member 4 (Slc12a4), transcript variant X3, mRNA	4.26	5.27	3.23	1.24	3	6.8	6.33	1.74	3.91	7.9	2.57	0.92	2.23	2.63	6.98	2.75	1.48	0	0	1.15
XM_028854292.2	Slc12a4	solute carrier family 12 member 4 (Slc12a4), transcript variant X4, mRNA	0	0	0	0	0	0	0	0	0.79	0	0.25	0	0	0	0	0	0	0	0.05	0
XM_028854293.1	Slc12a4	solute carrier family 12 member 4 (Slc12a4), transcript variant X5, mRNA	1.58	0	1.15	1.73	2.17	0.35	2.11	3.29	0.98	2.05	0	0.47	0	1.11	7.56	0.67	1.22	0.81	0.43	1.14
XM_028854295.1	Lcat	lecithin-cholesterol acyltransferase (Lcat), mRNA	1.95	1.34	1.37	0.84	0.99	1.47	3.18	0.94	1.23	3.25	0.75	0.58	0.56	1.86	7.55	0.35	0.4	0.4	0.27	0.32
XM_028854296.1	Abtb1	ankyrin repeat and BTB domain containing 1 (Abtb1), transcript variant X1, mRNA	103.04	130.35	84.7	125.25	102.51	185.58	162.09	155.81	123.13	185.86	111.08	78.06	74.19	144.75	62.04	66.67	36.25	50.72	51.5	114.87
XM_028854298.2	Pskh1	protein serine kinase H1 (Pskh1), mRNA	7.72	11	6.16	4.88	5.86	8.23	9.67	6.18	7.67	13.67	4.81	3.4	2.84	7.86	5.49	4.71	6.64	1.53	0.62	6.68
XM_028854299.2	Psmb10	proteasome 20S subunit beta 10 (Psmb10), mRNA	52.12	81.23	49.74	46.19	43.37	62.46	77.47	43.14	39.43	104.46	53.94	41.21	21.99	72.13	54.28	30.79	51.65	21.31	5.11	29.3
XM_028854300.2	Ctrl	chymotrypsin like (Ctrl), mRNA	0	0.06	0	0	0.12	0	0.05	0	0	0	0	0	0	0.06	0.07	0	0	0	0.06	0
XM_028854301.2	Cbfb	core-binding factor subunit beta (Cbfb), transcript variant X1, mRNA	8	11.39	7.34	4.19	7.12	6.41	6.45	3.92	6.2	7.01	4.71	4.56	2.94	6.69	7	3.52	5.38	1.89	0.51	9.45
XM_028854302.2	Cbfb	core-binding factor subunit beta (Cbfb), transcript variant X2, mRNA	13.36	20.01	12	8.72	13.04	10.94	12.55	8.04	8.27	18.56	6.47	7.67	3.82	13.89	13.85	7.31	9.17	1.74	1.09	15.9
XM_028854303.2	Ddx28	DEAD-box helicase 28 (Ddx28), mRNA	3.68	4.35	3.04	2.57	2.63	3.67	4.82	2.98	3.4	5.75	3.52	3.98	1.54	5.01	2.78	2.51	3.01	0.82	0.74	4
XM_028854305.2	Dus2	dihydrouridine synthase 2 (Dus2), transcript variant X1, mRNA	1.81	4.97	1.16	2.04	2.11	1.77	4.31	1.41	3.25	4.99	3.33	2.66	2.32	2.64	3.92	2.22	3.12	0.15	0.48	2.73
XM_028854307.2	Dus2	dihydrouridine synthase 2 (Dus2), transcript variant X2, mRNA	3.16	2.06	3.93	1.98	1.7	4.53	2	1.54	1.11	5.29	1.18	1.11	0.53	2.49	0.95	3.52	1.03	1.23	0.86	1.45
XM_028854309.2	Carmil2	capping protein regulator and myosin 1 linker 2 (Carmil2), transcript variant X1, mRNA	13.42	18.1	6.86	8.24	7.36	7.84	12.99	8.09	10.72	18.92	5.93	1.63	5.14	8.48	8.7	1.94	1.72	1.56	0.76	1.9
XM_028854310.1	Acd	ACD shelterin complex subunit and telomerase recruitment factor (Acd), transcript variant X1, mRNA	2.52	5.6	1.9	2.81	3.16	4.29	5.33	0.79	3.27	2.83	3.46	0.1	0.36	1.95	0.85	0.56	0.37	0.54	0.38	1.82
XM_028854311.1	Acd	ACD shelterin complex subunit and telomerase recruitment factor (Acd), transcript variant X2, mRNA	33.81	43.25	23.5	25.73	22.39	31.03	39.94	26.2	27.63	55.22	15.42	8.86	10.09	19.44	18.74	9.06	9.47	6.16	2.85	16.13
XM_028854313.2	Abtb1	ankyrin repeat and BTB domain containing 1 (Abtb1), transcript variant X3, mRNA	8.49	10.24	5.97	11.43	6.31	10.96	14.15	12.3	9.04	13.74	4.88	5.83	7.7	10.29	1.65	3.58	1.56	2.86	1.96	13.04
XM_028854314.2	Enkd1	enkurin domain containing 1 (Enkd1), transcript variant X5, mRNA	0.4	1.07	0	0	0	0	1.08	0	0	0.31	0.63	0.41	0	0.65	1.97	0	0	0	0	0.34
XM_028854315.2	Enkd1	enkurin domain containing 1 (Enkd1), transcript variant X6, mRNA	0	0	0.44	0.22	0.3	0.68	0.27	0.51	1.64	1.7	0	0	0.21	0	0	0.73	0.13	0.34	0.08	0
XM_028854318.2	Pard6a	par-6 family cell polarity regulator alpha (Pard6a), transcript variant X1, mRNA	0	0.15	0	0	0	0	0	0	0.36	0	0	0	0	0.37	0	0	0	0	0	0
XM_028854319.2	Pard6a	par-6 family cell polarity regulator alpha (Pard6a), transcript variant X2, mRNA	0	0	0	0.17	0	0	0.56	0	0.32	0.22	0	0.48	0	0	0.03	0	0	0	0	0.24
XM_028854320.2	Pard6a	par-6 family cell polarity regulator alpha (Pard6a), transcript variant X3, mRNA	1.86	1.67	0.93	0.5	1.02	0.81	0.87	0.87	0.55	1.91	0.66	0.14	0.27	0.58	1.16	0.99	0.46	0.18	0	0.65
XM_028854321.2	Pard6a	par-6 family cell polarity regulator alpha (Pard6a), transcript variant X4, mRNA	0	0.11	0.11	0.37	0.16	0.14	0.12	0.48	0.16	0.43	0	0	0	0	0.35	0	0.62	0	0.1	0
XM_028854326.2	Kiaa0895l	KIAA0895 like (Kiaa0895l), transcript variant X1, mRNA	0	0.06	0	0.1	0.03	0.2	0.17	0.04	0.04	0.3	0	0	0.01	0.17	0.56	0	0.01	0	0	0
XM_028854329.2	Scn3a	sodium voltage-gated channel alpha subunit 3 (Scn3a), transcript variant X9, mRNA	0	0	0	0	0	0	0	0	0	0	0	0	0	0	0	0	0	0	0	0
XM_028854333.2	Kiaa0895l	KIAA0895 like (Kiaa0895l), transcript variant X4, mRNA	0	0	0	0	0	0	0	0	0	0	0	0	0	0	0	0	0	0	0	0.02
XM_028854334.2	Kiaa0895l	KIAA0895 like (Kiaa0895l), transcript variant X5, mRNA	0	0	0	0	0.14	0	0	0	0	0	0	0	0	0	0	0.08	0	0	0	0.03
XM_028854337.2	Kiaa0895l	KIAA0895 like (Kiaa0895l), transcript variant X8, mRNA	0	0.12	0.18	0	0	0	0	0.03	0.15	0	0.1	0	0.05	0	0	0	0	0	0.08	0.04
XM_028854339.2	Podxl2	podocalyxin like 2 (Podxl2), mRNA	0.04	0.43	0.71	0.17	0.46	0.06	0.1	0.17	0.09	0.15	0.25	0.11	0.15	0.21	0.13	0.08	0.08	0.09	0.04	0.16
XM_028854340.2	Nol3	nucleolar protein 3 (Nol3), transcript variant X1, mRNA	0	0.55	0.32	0.27	1.1	0.54	0.76	0.32	0.27	0.3	0.29	0.1	0.19	0	0	0.24	0.29	0.19	0.11	0.33
XM_028854341.2	Nol3	nucleolar protein 3 (Nol3), transcript variant X2, mRNA	0	0.05	0.14	0	0	0.18	0	0	0	0.13	0	0.27	0	0.69	0.24	0	0	0	0	0.09
XM_028854342.2	Nol3	nucleolar protein 3 (Nol3), transcript variant X3, mRNA	0	0	0	0	0.21	0	0	0	0	0.09	0.17	0.04	0	0	0	0	0	0	0	0
XM_028854343.2	Nol3	nucleolar protein 3 (Nol3), transcript variant X4, mRNA	0	0	0	0.21	0.3	0	0	0	0	0	0	0	0	0	0	0	0	0	0	0
XM_028854344.2	Gfod2	glucose-fructose oxidoreductase domain containing 2 (Gfod2), mRNA	3.77	5.76	3.1	3.86	3.84	3	3.48	2.52	3.36	5.49	2.33	1.95	1.37	2.25	3.11	2.03	2.5	1.83	0.85	1.61
XM_028854345.2	LOC114681071	acylcarnitine hydrolase-like (LOC114681071), mRNA	0.11	10.12	1.23	7.18	4.56	7.09	9.29	5.57	2.46	6.73	34.07	18.33	14.7	27.45	7.57	0.26	0.19	1.96	1.05	9.62
XM_028854346.2	Ces2c	acylcarnitine hydrolase-like (LOC114681072), mRNA	0	0	0	0.01	0	0	0.00942	0	0	0.00989	0.01	0	0	0	0	0	0	0	0	0
XM_028854349.2	Hsf4	heat shock transcription factor 4 (Hsf4), transcript variant X1, mRNA	0	0.12	0	0.09	0	0	0	0	0	0.18	0	0	0	0	0	0	0	0	0	0.08
XM_028854350.2	Hsf4	heat shock transcription factor 4 (Hsf4), transcript variant X2, mRNA	0	0	0	0	0	0.18	0	0	0.04	0	0	0	0	0.08	0	0.06	0	0	0	0
XM_028854352.2	Hsf4	heat shock transcription factor 4 (Hsf4), transcript variant X3, mRNA	0.12	0.07	0.14	0	0.11	0	0.34	0.15	0.19	0	0.28	0.03	0.04	0	0.08	0	0.18	0.19	0	0.05
XM_028854353.2	Mcm2	minichromosome maintenance complex component 2 (Mcm2), mRNA	4.04	4.59	3.05	3.17	3.27	3.73	5.58	3.14	3.64	6.04	2.36	2.36	1.7	4.79	9.42	7.05	4.19	1.28	0.54	7.25
XM_028854354.2	Fbxl8	F-box and leucine rich repeat protein 8 (Fbxl8), mRNA	1.16	0.66	0.85	0.42	0.34	0.63	1.07	0.71	1.31	1.66	0.65	0.41	0.23	0.47	0.45	0.44	0.91	0.12	0.18	0.84
XM_028854355.2	Tradd	TNFRSF1A associated via death domain (Tradd), mRNA	6.39	9.92	4.85	5.1	6.58	8.11	7.6	6.03	6.18	11.18	5.49	5.57	3.21	6.84	4.57	5.15	7.63	1.89	0.49	6.72
XM_028854356.2	Tsnaxip1	translin associated factor X interacting protein 1 (Tsnaxip1), transcript variant X1, mRNA	0	0.05	0	0	0	0	0	0.04	0	0	0	0.04	0.03	0.05	0	0	0	0	0	0
XM_028854358.2	LOC114681079	pyrethroid hydrolase Ces2e-like (LOC114681079), transcript variant X2, mRNA	0	0.18	0.04	0.08	0.07	0.14	0.06	0	0.15	0	0	0	0	0	0	0.01	0	0	0	0
XM_028854363.2	LOC114681082	pyrethroid hydrolase Ces2e-like (LOC114681082), mRNA	4.72	3.26	5.18	2.9	2.72	9.03	7.28	6.63	9.37	28.7	3.95	1.67	1.54	11.07	0.52	3.37	2.28	0.62	0.09	7.69
XM_028854364.2	Thap11	THAP domain containing 11 (Thap11), mRNA	11.25	11.44	7.78	7.95	8.96	9.76	12.83	9.15	10.26	16.05	5.54	4.22	3.3	9.73	7.31	4.35	5.35	2.17	1.25	6.8
XM_028854365.2	Tpra1	transmembrane protein adipocyte associated 1 (Tpra1), mRNA	20.42	26.08	16.7	23.75	20.72	28.93	25.82	17.54	25.22	40.16	19.89	11.55	10.79	18.14	30.98	14.92	12.57	6.49	5.92	22.12
XM_028854366.2	Lrrc36	leucine rich repeat containing 36 (Lrrc36), transcript variant X1, mRNA	0	0	0	0	0	0	0	0	0	0	0	0	0	0	0	0	0	0	0	0
XM_028854367.2	Lrrc36	leucine rich repeat containing 36 (Lrrc36), transcript variant X2, mRNA	0	0	0	0	0.03	0	0.02	0	0	0	0.02	0	0.03	0	0	0.02	0.16	0	0	0.04
XM_028854369.2	Plekhg4	pleckstrin homology and RhoGEF domain containing G4 (Plekhg4), mRNA	0	0	0	0	0	0.02	0	0	0	0	0.03	0.01	0	0	0.02	0.0067	0	0	0	0
XM_028854374.2	Exoc3l1	exocyst complex component 3 like 1 (Exoc3l1), transcript variant X7, mRNA	0	0	0	0.12	0.06	0.05	0	0	0	0	0.05	0	0	0	0.06	0	0	0	0	0
XM_028854377.2	Ces4a	carboxylesterase 4A (Ces4a), transcript variant X1, mRNA	0	0	0	0	0	0	0	0	0	0	0	0	0	0	0	0	0	0	0	0
XM_028854379.2	Kctd19	potassium channel tetramerization domain containing 19 (Kctd19), mRNA	0	0.01	0	0.02	0	0	0	0	0	0	0	0.02	0	0	0.09	0.14	0.44	0	0	0.02
XM_028854380.2	LOC114681092	acylcarnitine hydrolase-like (LOC114681092), transcript variant X1, mRNA	0	0	0.03	0	0	0	0.05	0	0	0.25	0	0	0	0	0	0.18	2.17	0	0	0
XM_028854382.2	Ripor1	RHO family interacting cell polarization regulator 1 (Ripor1), transcript variant X1, mRNA	1.32	1.89	1.06	1.21	0.21	1.01	0.91	0.09	0.7	3.42	0.98	0.47	1.32	2.34	2.56	2.52	1.84	0.16	0.34	0
XM_028854383.2	Ripor1	RHO family interacting cell polarization regulator 1 (Ripor1), transcript variant X3, mRNA	3.16	8.19	4.69	3.4	3.39	4	7.75	3.57	2.73	10.84	1.92	0	0.77	3.28	4.01	1.2	1.94	0.7	0.26	2.91
XM_028854384.2	Ctcf	CCCTC-binding factor (Ctcf), transcript variant X1, mRNA	7.51	9.98	5.46	6.8	8.02	6.17	7.33	7.53	8.58	12.39	5.28	6.84	3.07	7.82	10.8	2.83	4.81	1.28	1.16	6.83
XM_028854385.2	Ctcf	CCCTC-binding factor (Ctcf), transcript variant X2, mRNA	17.89	25.08	15.62	11.74	16.29	16.03	20.76	9.14	13.73	24.35	10.96	8.91	8.22	18.48	16.62	8.85	8.64	2.53	0.82	13.71
XM_028854386.2	LOC114681095	pyrethroid hydrolase Ces2e-like (LOC114681095), mRNA	2.37	0.22	1.65	0.33	0.06	3.07	0.32	2.02	1.82	7.84	0.19	0.23	0.13	3.35	0.07	1.24	1.22	0.13	0	1.6
XM_028854387.2	Plxna1	plexin A1 (Plxna1), mRNA	0.13	0.35	0.33	0.44	0.74	0.4	0.32	0.18	0.5	0.77	0.36	0.15	0.06	0.21	0.43	1.74	1.64	0.04	0.04	0.2
XM_028854388.2	LOC114681096	carboxylesterase 3A-like (LOC114681096), mRNA	0	0	0	0	0	0	0	0	0	0	0	0	0	0	0	0	0	0	0	0
XM_028854389.2	Hsd11b2	hydroxysteroid 11-beta dehydrogenase 2 (Hsd11b2), mRNA	0.09	0.32	0.36	0.37	0.12	0.22	0.12	0.13	0.27	0.44	0.08	0	0.1	0.14	0.18	0	0.15	0.04	0.07	0.07
XM_028854391.2	Dpep3	dipeptidase 3 (Dpep3), mRNA	0.03	0.05	0.02	0.09	0.07	0.22	0.06	0.19	0	0.17	0	0	0.09	0.24	0.08	0.38	0.24	0.02	0	0.12
XM_028854392.2	Cenpt	centromere protein T (Cenpt), transcript variant X2, mRNA	0.1	0	0	0.06	0.32	1.21	0.33	0.61	0	0.53	0	0	0.02	0.71	1.1	0.94	0.72	0	0	1.29
XM_028854393.2	Mapkbp1	mitogen-activated protein kinase binding protein 1 (Mapkbp1), mRNA	1.84	4.05	1.78	1.55	1.7	2.22	2.86	1.56	2.44	5.54	0.58	0.56	0.56	1.25	1.26	0.84	1.15	0.26	0.13	0.74
XM_028854394.1	Chchd6	coiled-coil-helix-coiled-coil-helix domain containing 6 (Chchd6), mRNA	2.44	5.05	1.7	1.95	2.28	2.58	4.35	3.05	1.62	3.64	1.02	0.41	0.33	1.29	2.56	1.1	1.32	0.69	0.28	0.78
XM_028854395.2	Ehd4	EH domain containing 4 (Ehd4), mRNA	14.36	21.74	19.88	13.69	18.55	22.56	24.59	13.06	18.83	40.81	13.54	16.56	9.86	20.83	9.34	14.06	30.24	6.43	2.05	17.33
XM_028854397.2	Vps39	VPS39 subunit of HOPS complex (Vps39), transcript variant X2, mRNA	11.09	17.16	11.75	10.74	10.9	11.46	13.42	7.95	13.42	25.7	7.67	10.93	8.03	14.43	9.56	5.67	8.67	1.59	1	13.7
XM_028854398.2	Vps39	VPS39 subunit of HOPS complex (Vps39), transcript variant X3, mRNA	2.69	0.48	0.4	0	0.7	1.64	3.06	0.63	0.7	0.2	0.52	0.59	0.95	2.24	0.35	1.62	0.76	1.37	0.18	1.38
XM_028854399.2	LOC114681111	RNA polymerase-associated protein RTF1 homolog (LOC114681111), mRNA	5.14	7.83	3.36	3.51	4.39	5.37	5.98	3.23	6.23	9.81	4.57	3.71	3.62	3.93	6.75	3.66	5.7	1.18	0.91	4.8
XM_028854401.2	Pla2g4e	phospholipase A2 group IVE (Pla2g4e), mRNA	0.00929	0.01	0	0	0.05	0	0.03	0	0	0.04	0.01	0	0	0	0.04	0	0	0	0	0
XM_028854402.2	LOC114681115	rho-related GTP-binding protein RhoV-like (LOC114681115), mRNA	0	0.09	0.12	0.08	0	0.1	0	0	0	0	0.04	0.19	0.09	0.06	0.03	0.09	0.04	0.05	0	0.19
XM_028854404.2	LOC114681117	inositol-trisphosphate 3-kinase A (LOC114681117), mRNA	0.15	0.31	0.12	0.06	0	0.08	0.13	0.05	0.1	0.13	0	0.03	0.03	0.06	0.04	0.03	0	0.11	0	0.03
XM_028854406.2	Jmjd7	jumonji domain containing 7 (Jmjd7), mRNA	5.14	7.64	3.59	4.42	4.1	4.92	5.56	2.57	3.51	6.35	1.94	1.45	1.04	3.22	4.72	1.11	1.11	0.85	0.33	1.94
XM_028854407.2	Lrrc57	leucine-rich repeat-containing protein 57 (LOC114681120), transcript variant X2, mRNA	4.57	0	0	3.13	3.03	0	0	0	0	0	0	0	0	6.13	0	0	0	0	0.69	0
XM_028854408.2	Igfbp7	insulin like growth factor binding protein 7 (Igfbp7), mRNA	0.35	0.44	1.51	0.24	5.06	2.47	3.31	1.87	1.06	6.7	1.69	0.81	0.5	0.17	0.91	2.53	2.31	0.75	0.25	2.82
XM_028854409.1	LOC114681120	leucine-rich repeat-containing protein 57 (LOC114681120), transcript variant X3, mRNA	0	0	0	0	0	0	0	0	0	0	0	0	0	0	0	0	0	0	0	0
XM_028854410.2	Znf106	zinc finger protein 106 (Znf106), mRNA	11.84	17.09	11.51	9.54	13.98	11.99	13.91	9.67	11.23	20.85	15.33	12.99	13.22	22.55	11.93	7.41	8.31	2.94	1.31	13.17
XM_028854418.2	Snap23	synaptosome associated protein 23 (Snap23), transcript variant X1, mRNA	0	0	0	0	0	0	0	0	0	0	0	0	0.57	0.05	0	0	0	0	0	0
XM_028854419.2	Snap23	synaptosome associated protein 23 (Snap23), transcript variant X4, mRNA	0.62	0	0	1.05	1.11	0.34	0.12	0	0	0	0.36	0	0	2.75	0.24	0	0.22	0	0.24	0
XM_028854421.2	Snap23	synaptosome associated protein 23 (Snap23), transcript variant X5, mRNA	0.02	0	0	0.13	0.13	0.23	0.05	0.37	0	0	0.11	0.82	0	0.28	0.38	0.14	0	0	0	0.55
XM_028854422.2	Snap23	synaptosome associated protein 23 (Snap23), transcript variant X6, mRNA	1.9	2.74	0.77	1.77	3.72	4.3	1.33	2.56	0	0.29	6.57	0.78	0.25	8.32	5.53	2.57	3.6	0	0.9	0.51
XM_028854423.2	Snap23	synaptosome associated protein 23 (Snap23), transcript variant X2, mRNA	4.68	7.24	0.32	3.56	7.02	12.18	4.28	6.35	0	0.36	23.07	0.32	0.34	16.03	15.62	6.41	12.87	0.06	2.32	0.09
XM_028854424.2	Snap23	synaptosome associated protein 23 (Snap23), transcript variant X7, mRNA	0	0.21	0	0.91	0.28	1.91	0.19	0	0	0.12	0.4	0.18	0	0.8	0.88	0	0.74	0	0.16	0
XM_028854425.2	Snap23	synaptosome associated protein 23 (Snap23), transcript variant X3, mRNA	0.11	0.15	0	0.31	0.29	3.17	0.41	0.1	0	0	1.11	0.22	0	1.16	1.01	0.55	0.28	0	0.34	0
XM_028854426.2	Snap23	synaptosome associated protein 23 (Snap23), transcript variant X8, mRNA	0.13	0	0.36	0	0.16	0.19	0.52	0.06	0.14	1.26	0.28	3.77	1.67	1.06	0.24	1.46	0.35	0	0	1.76
XM_028854427.2	Txnrd3	thioredoxin reductase 3 (Txnrd3), mRNA	1.04	0.95	0.44	0.43	0.44	0.39	0.53	0.55	0.3	0.63	0.21	0.13	0.18	0.31	0.32	0.45	0.32	0.05	0.09	0.33
XM_028854428.2	Snap23	synaptosome associated protein 23 (Snap23), transcript variant X9, mRNA	14.28	6.45	4.66	9.74	11.39	0	6.1	0.59	4.97	6.54	2.39	16.6	10.01	40.42	4.91	10.3	1.81	4.64	2.39	15.09
XM_028854429.2	Snap23	synaptosome associated protein 23 (Snap23), transcript variant X10, mRNA	0.26	0	0.66	2.53	2.01	0.7	0	3.53	0	0.4	1.88	1.61	0.95	7.22	1.22	0.23	0	0.95	0.42	1.36
XM_028854430.2	Snap23	synaptosome associated protein 23 (Snap23), transcript variant X11, mRNA	0.02	0	0	0	0	22.05	0	6.31	0	0	28.36	0	0	1.68	14.67	1.47	20.45	0	0	0
XM_028854431.2	LOC114681126	vacuolar protein sorting-associated protein 18 homolog (LOC114681126), mRNA	1.67	1.52	0.45	1.16	1.64	1.39	1.76	1.01	0.86	0.86	1.33	0.62	0.3	2.56	1.17	1.79	1.83	0.18	0.23	1.96
XM_028854432.2	Ndufaf1	NADH:ubiquinone oxidoreductase complex assembly factor 1 (Ndufaf1), transcript variant X3, mRNA	0	2.42	0.86	0	0	0.21	1.11	0.72	1.7	2.03	0.11	1.51	0.34	0.37	0.05	0	0.52	0.15	0	1.04
XM_028854434.1	Ndufaf1	NADH:ubiquinone oxidoreductase complex assembly factor 1 (Ndufaf1), transcript variant X4, mRNA	0	0.34	0.6	0	0	0	0.38	0	1.53	1.45	0	0.11	0.16	0	0	0.04	0	0.29	0	0.93
XM_028854436.2	Ndufaf1	NADH:ubiquinone oxidoreductase complex assembly factor 1 (Ndufaf1), transcript variant X2, mRNA	0.64	2.48	2.44	0.13	0.8	0.69	1.88	0.53	2.26	2.03	0.33	1.4	1.31	0	1.27	2.67	0.88	0.63	0	1.59
XM_028854438.2	Ndufaf1	NADH:ubiquinone oxidoreductase complex assembly factor 1 (Ndufaf1), transcript variant X5, mRNA	0.09	0.3	0.3	0	0	0	0.79	0.2	0.52	0.65	0.26	0.27	0.63	0.18	0.39	0.24	0.09	0	0	0
XM_028854439.2	Ino80	INO80 complex ATPase subunit (Ino80), transcript variant X1, mRNA	3.49	7.13	3.4	2.27	2.95	2.52	3.87	0.78	1.98	6.41	0.89	3.44	1.8	4.56	2.75	1.84	3.37	0.45	0.23	4.29
XM_028854441.2	Ino80	INO80 complex ATPase subunit (Ino80), transcript variant X2, mRNA	4	4.11	2.29	3.65	3.5	3.86	4.1	4.05	4.8	5.72	4.13	3.75	2.25	4.82	5.67	3.63	4.56	1.03	0.64	2.48
XM_028854442.1	Exd1	exonuclease 3'-5' domain containing 1 (Exd1), mRNA	0.47	0.56	0.35	0.59	0.27	0.89	0.58	0.66	0.68	1.17	1.06	4.83	2.52	2.93	1.69	0.51	0.36	0.5	0.07	4.72
XM_028854445.2	Mga	MAX dimerization protein MGA (Mga), transcript variant X11, mRNA	0.81	0.04	2.15	1.66	1.18	0.45	1.51	1.71	1.51	2.09	0.68	2.11	0	1.81	2	0.26	0.98	0	0	0.00847
XM_028854448.2	Chst13	carbohydrate sulfotransferase 13 (Chst13), mRNA	0.43	0.87	0.22	0.75	0.84	1.42	0.71	0.71	0.53	1.6	1.37	1.54	0.84	1.92	1.18	0.77	0.92	0.12	0.47	3.33
XM_028854460.2	Mga	MAX dimerization protein MGA (Mga), transcript variant X13, mRNA	4.78	9.69	4.06	2.4	4.7	4.53	4.65	0.88	4.17	6.86	2.69	1.08	2.39	3.72	3.53	2.06	2.86	0.65	0.63	2.45
XM_028854463.2	C3H3orf22	chromosome 3 C3orf22 homolog (C3H3orf22), mRNA	0	0.13	0	0	0.03	0	0	0	0	0.05	0	0.06	0.07	0.18	0.26	0	0.03	0	0	0.45
XM_028854464.2	Pla2g4d	phospholipase A2 group IVD (Pla2g4d), transcript variant X2, mRNA	0	0	0	0	0	0	0	0	0	0	0	0	0	0	0	0	0	0	0	0
XM_028854465.2	Chac1	ChaC glutathione specific gamma-glutamylcyclotransferase 1 (Chac1), mRNA	0.65	0.44	0.16	0.32	0.54	1.18	0.86	0.67	0.49	0.98	0.75	2.34	1.2	1.77	0.73	1.05	0.62	0.23	0.15	5
XM_028854468.2	Ganc	glucosidase alpha, neutral C (Ganc), transcript variant X1, mRNA	1.13	1.82	0.98	0.87	0.59	0.76	1.54	0.96	1.11	2.01	0.59	0.37	0.48	0.79	4.28	0.3	0.43	0.15	0.08	0.5
XM_028854469.2	Ganc	glucosidase alpha, neutral C (Ganc), transcript variant X2, mRNA	0	0	0	0.17	0.07	0.2	0.11	0.21	0	0	0	0	0	0.24	0.08	0	0	0	0	0.03
XM_028854471.2	Ganc	glucosidase alpha, neutral C (Ganc), transcript variant X3, mRNA	0	0.15	0	0.2	0.05	0	0.16	0	0.15	0	0	0	0	0	0.25	0	0	0	0	0
XM_028854472.2	Tmem87a	transmembrane protein 87A (Tmem87a), transcript variant X2, mRNA	8.84	15.03	8.75	6.37	7.58	5.33	11.5	4.99	7.12	14.97	4.19	4.98	4.51	7.09	35.26	4.75	4.92	1.71	0.66	5.61
XM_028854473.2	Tmem87a	transmembrane protein 87A (Tmem87a), transcript variant X4, mRNA	0.24	0.06	0	0.11	0.82	0.02	0	0	0.22	0.32	0	0	0.06	0.32	0.91	0	0.68	0	0	0
XM_028854474.2	Tmem87a	transmembrane protein 87A (Tmem87a), transcript variant X1, mRNA	0	0.15	0.53	0	0	0.25	0.41	0.42	1.31	1.11	0	0	0	1.16	0.84	0	0	0	0	0.04
XM_028854475.2	Cap1	cyclase associated actin cytoskeleton regulatory protein 1 (Cap1), transcript variant X2, mRNA	100.33	125.02	73.11	73.35	78.84	140.92	113.27	91.83	90.93	170.6	159.05	199.48	115.66	219.95	101.6	75.87	81.9	42.53	17.85	239.56
XM_028854476.2	Cap1	cyclase associated actin cytoskeleton regulatory protein 1 (Cap1), transcript variant X1, mRNA	82.78	108.25	59.99	73.92	69.6	110.27	110.77	76.28	76.75	144.68	136.22	169.23	88.43	168.51	81.91	52.96	71.78	30.46	10.69	221.37
XM_028854477.2	Cap1	cyclase associated actin cytoskeleton regulatory protein 1 (Cap1), transcript variant X3, mRNA	22.47	32.58	21.75	24.36	23.4	35.47	32.39	26.85	28.13	37.49	43.6	50.29	20.87	62.14	29.28	31.44	39.15	14.64	3.47	65.02
XM_028854478.2	Cap1	cyclase associated actin cytoskeleton regulatory protein 1 (Cap1), transcript variant X4, mRNA	17.77	25.27	10.36	20.99	19.38	25.46	36.14	17.47	23.84	36.36	40.99	42.2	25.28	52.36	25.32	22.61	26.84	7.85	4.03	53.15
XM_028854479.2	LOC114681149	palmitoyl-protein thioesterase 1 (LOC114681149), mRNA	22.82	29.52	15.87	17.81	19.96	21.83	26.01	16.47	21.1	34.49	14.16	9.89	8.94	27.11	17.77	12.17	14.83	4.22	1.33	13.62
XM_028854480.2	Trit1	tRNA isopentenyltransferase 1 (Trit1), transcript variant X1, mRNA	4.78	5.41	2.95	3.34	3.65	4.99	6.03	2.91	3.59	7.23	1.76	0.76	1.03	2.67	3.84	1.35	1.92	0.66	0.36	0.89
XM_028854482.1	LOC114681148	vomeronasal type-1 receptor 94-like (LOC114681148), mRNA	0	0	0	0	0	0	0	0	0	0	0	0	0	0	0	0	0	0	0	0
XM_028854484.2	Hpcal4	hippocalcin like 4 (Hpcal4), transcript variant X1, mRNA	0	0.04	0.4	0	0.17	0.01	0	0	0	0	0	0	0	0	0	0	0	0	0.02	0
XM_028854485.2	Hpcal4	hippocalcin like 4 (Hpcal4), transcript variant X2, mRNA	0	0	0.17	0	0	0	0	0	0	0	0	0	0	0	0	0	0	0	0	0
XM_028854486.2	Akirin1	akirin 1 (Akirin1), mRNA	32.95	40.09	27.22	22.09	28.02	34.6	36.44	24.19	29.01	42.14	37.06	56.49	27.17	60.72	41.03	33.39	37.07	12.72	6.53	67.92
XM_028854487.2	Pabpc4	poly(A) binding protein cytoplasmic 4 (Pabpc4), transcript variant X1, mRNA	4.09	5.27	2.5	4.65	4.09	2.97	7.14	2.91	4.28	5.12	3.17	1.83	0.68	5.03	4.57	7.8	9.53	0.8	1.26	3.87
XM_028854488.2	Pabpc4	poly(A) binding protein cytoplasmic 4 (Pabpc4), transcript variant X2, mRNA	3.74	6.33	2.22	3.92	2.82	4.13	2.77	4.18	2.41	5.52	3.44	1.91	2.85	3.25	4.83	7.04	8.62	0.79	0.95	2.55
XM_028854489.2	Pabpc4	poly(A) binding protein cytoplasmic 4 (Pabpc4), transcript variant X3, mRNA	3.17	5.19	3.91	0.71	2.3	3.66	3.15	1.35	2.44	5.55	2.07	1.21	1.29	3.49	4.92	7.01	7.28	1.81	0	2.03
XM_028854490.2	Pabpc4	poly(A) binding protein cytoplasmic 4 (Pabpc4), transcript variant X4, mRNA	0.18	1.24	0.94	0.33	2.64	0.34	0.95	0	1.55	1.02	0.72	0.38	0.49	0.78	0	0.87	0.69	0	0	1.35
XM_028854491.2	Heyl	hes related family bHLH transcription factor with YRPW motif like (Heyl), mRNA	0.22	0.46	0.33	0.2	0.42	0.27	0.53	0.15	0.03	0.64	0.23	0.04	0.05	0.2	0.01	0.2	0.00917	0	0.02	0.07
XM_028854492.2	Uroc1	urocanate hydratase 1 (Uroc1), mRNA	0.19	0.31	0.28	0.34	0.1	0.32	0.16	0.32	0.17	0.48	0.08	0.12	0.06	0.16	0	0.08	0.02	0.02	0	0.08
XM_028854493.2	Oxct2	3-oxoacid CoA-transferase 2 (Oxct2), mRNA	0	0	0	0	0	0	0	0	0	0	0	0	0	0	0	0.02	0	0	0	0.08
XM_028854496.2	Ppie	peptidylprolyl isomerase E (Ppie), mRNA	17.85	26.5	13.82	14.68	15.15	15.61	19.58	13.4	15.45	27.12	13.46	8.84	6.64	14.57	16.44	16.52	26.07	4.93	2.18	7.66
XM_028854497.2	LOC114681164	succinyl-CoA:3-ketoacid coenzyme A transferase 2A, mitochondrial-like (LOC114681164), mRNA	0	0	0	0	0	0	0	0	0	0.03	0	0	0	0	0	0.05	0	0	0	0.11
XM_028854499.2	Mycl	MYCL proto-oncogene, bHLH transcription factor (Mycl), transcript variant X1, mRNA	0	0.07	0	0	0	0	0.32	0	0	0	0	0	0	0	0.63	0	0	0	0	0
XM_028854501.1	Ndufs5	NADH:ubiquinone oxidoreductase subunit S5 (Ndufs5), transcript variant X1, mRNA	10.11	9.84	9.72	7.89	8.38	12.5	14.79	6.5	12.59	14.06	9.08	5.65	5.19	10.33	9.09	10.43	10.86	3.44	0.85	5.86
XM_028854502.2	Zxdc	ZXD family zinc finger C (Zxdc), transcript variant X1, mRNA	4.65	5.96	2.35	2.26	3.51	3.45	4.64	2.9	3.06	7.65	2.6	2.33	2.82	5.55	2.29	2.23	2.55	0.93	0.84	3.91
XM_028854503.2	Ndufs5	NADH:ubiquinone oxidoreductase subunit S5 (Ndufs5), transcript variant X2, mRNA	9.85	16.07	8.68	8.75	8.89	14.05	17.37	11.16	12.95	16.99	10.35	8.43	2.13	10.56	8.28	12.3	20.31	3.49	1.68	8.82
XM_028854504.2	Ndufs5	NADH:ubiquinone oxidoreductase subunit S5 (Ndufs5), transcript variant X3, mRNA	3.09	1.02	1.49	0.79	1.25	2.36	1.06	0.86	0.62	3.35	1.56	0.3	1.26	1.89	1.32	0.23	0.56	0.37	0.11	1.6
XM_028854505.2	Mfsd2a	major facilitator superfamily domain containing 2A (Mfsd2a), transcript variant X1, mRNA	0	0	0	0	0	0	0	0	0	0	0.03	0.07	0	0	0.45	0.68	1.95	0	0	0.3
XM_028854506.2	Mfsd2a	major facilitator superfamily domain containing 2A (Mfsd2a), transcript variant X2, mRNA	0	0.03	0.05	0.03	0.03	0.03	0.04	0.08	0	0.07	0	0	0.12	0.06	0	0.45	0.35	0	0.01	0
XM_028854507.2	Nt5c1a	5'-nucleotidase, cytosolic IA (Nt5c1a), mRNA	0.02	0.23	0.14	0.04	0.51	0	0	0	0	0.06	0	0	0.2	0.1	0.1	0	0.03	0	0	0
XM_028854508.2	Rragc	Ras related GTP binding C (Rragc), mRNA	15.82	22.08	13.53	12.65	17.4	20.7	16.71	12.45	13.46	25.21	14.61	15.69	9.25	24.75	17.82	28.26	23.46	3.91	1.72	26.68
XM_028854511.2	Zxdc	ZXD family zinc finger C (Zxdc), transcript variant X2, mRNA	2.91	4.21	3.95	3.74	3.28	3.46	4.68	2.93	3.28	5.93	2.66	2.66	1.27	3.65	4.49	2.43	3.16	0.48	0	3.08
XM_028854512.2	LOC114681174	MYC binding protein (LOC114681174), mRNA	3.99	5.34	2.74	2.83	3.8	4.14	3.73	3.73	2.99	6.75	3.75	2.02	1.73	3.29	1.96	2.2	4.14	1.01	1.08	3.75
XM_028854514.2	Tenm3	teneurin transmembrane protein 3 (Tenm3), transcript variant X1, mRNA	0	0	0	0	0	0	0	0	0	0	0	0	0	0	0	0	0	0	0	0
XM_028854515.2	Tenm3	teneurin transmembrane protein 3 (Tenm3), transcript variant X2, mRNA	0	0	0	0	0	0	0	0	0	0	0	0	0	0	0	0	0	0	0	0
XM_028854517.2	Tenm3	teneurin transmembrane protein 3 (Tenm3), transcript variant X3, mRNA	0	0	0	0	0	0	0	0	0	0	0	0	0	0	0	0	0	0	0	0
XM_028854518.2	Tenm3	teneurin transmembrane protein 3 (Tenm3), transcript variant X4, mRNA	0	0	0	0	0	0	0	0	0	0	0	0	0	0	0	0	0	0	0	0
XM_028854519.2	Tenm3	teneurin transmembrane protein 3 (Tenm3), transcript variant X5, mRNA	0	0	0	0	0	0	0	0	0	0	0	0	0	0	0	0	0	0	0.02	0
XM_028854520.2	Cfap100	cilia and flagella associated protein 100 (Cfap100), mRNA	0.02	0.09	0.02	0.08	0	0	0.02	0	0	0.02	0	0	0	0	0	0	0	0	0	0
XM_028854521.2	Tenm3	teneurin transmembrane protein 3 (Tenm3), transcript variant X6, mRNA	0	0	0	0	0	0	0	0	0	0	0	0	0	0	0	0	0	0	0	0
XM_028854522.2	Tenm3	teneurin transmembrane protein 3 (Tenm3), transcript variant X7, mRNA	0	0	0	0	0	0	0	0	0	0.00907	0	0	0	0	0	0	0	0	0	0
XM_028854523.2	Tenm3	teneurin transmembrane protein 3 (Tenm3), transcript variant X8, mRNA	0	0	0.13	0	0	0	0	0	0	0.08	0	0	0	0.16	0	0	0	0	0	0.14
XM_028854524.2	Tenm3	teneurin transmembrane protein 3 (Tenm3), transcript variant X9, mRNA	0	0.07	0	0	0.13	0	0	0	0	0	0.01	0.00939	0	0	0	0	0	0	0	0.2
XM_028854525.2	Tenm3	teneurin transmembrane protein 3 (Tenm3), transcript variant X10, mRNA	0	0	0	0	0	0.00341	0.0048	0.02	0.00921	0	0	0	0	0	0	0.01	0.00881	0.03	0	0
XM_028854526.2	Ing2	inhibitor of growth family member 2 (Ing2), mRNA	10.09	8.87	7.14	7.15	7.01	7.93	9.95	6.35	7.09	12.8	5.4	2.42	5.04	6.22	9.44	2.24	2	1.8	0.91	3.71
XM_028854527.2	LOC114681184	CDKN2A interacting protein (LOC114681184), transcript variant X1, mRNA	8.04	10.82	7.17	6.14	8.1	6.97	9.14	6.43	6.52	12.31	5.18	5.95	3.6	8.9	8.48	4.25	4.73	1.29	0.55	6.29
XM_028854528.2	LOC114681184	CDKN2A interacting protein (LOC114681184), transcript variant X2, mRNA	0.91	1.32	0.75	1.2	1.48	1.13	1.4	0.43	1.1	1.11	0.62	0.88	0.96	0.97	1.09	0.75	0.59	0.13	0.04	1.65
XM_028854529.2	Noa1	nitric oxide associated 1 (Noa1), transcript variant X1, mRNA	3.15	2.91	2.21	1.46	2.52	2.61	2.79	2.23	2.75	5.5	1.32	0.88	0.4	1.44	1.9	1.49	2.68	0.9	0.48	1.81
XM_028854530.2	Dctd	dCMP deaminase (Dctd), transcript variant X2, mRNA	0	0	0	0.24	0	0	0.21	0	0	0	0	0	0	0	0	0.32	0	0	0	0
XM_028854531.2	Dctd	dCMP deaminase (Dctd), transcript variant X3, mRNA	0	0	0	0	0	0	0.42	0	0	0	0.53	0	0	0	0	0	0	0	0	0
XM_028854532.2	Dctd	dCMP deaminase (Dctd), transcript variant X5, mRNA	0	0	0	0	0	0	0	0	0	0.1	0	0	0.09	0	0.69	0	0.23	0.28	0	0
XM_028854533.2	LOC114681187	claudin-22 (LOC114681187), transcript variant X2, mRNA	0	0.06	0.05	0	0	0	0	0	0	0	0.05	0	0	0.03	0	0	0	0	0	0
XM_028854534.2	Klf15	Kruppel like factor 15 (Klf15), transcript variant X1, mRNA	0	0	0	0	0	0	0	0	0	0	0	0	0	0	0	0.22	0	0	0	0
XM_028854535.2	Wwc2	WW and C2 domain containing 2 (Wwc2), mRNA	0.39	1.5	1.13	0.58	1.05	0.46	0.71	0.34	0.81	1.91	0.29	1.6	0.27	1.5	0.59	1.28	1.52	0.11	0.04	1.95
XM_028854536.2	LOC114681187	claudin-22 (LOC114681187), transcript variant X1, mRNA	0	0	0	0	0	0	0	0	0	0.02	0	0.07	0	0.04	0	0	0	0	0	0
XM_028854538.2	Baiap3	BAI1 associated protein 3 (Baiap3), transcript variant X1, mRNA	0	0.36	0	0	0	0	0	0.24	0.3	0	0	0	0	0	0.11	0	0	0	0	0
XM_028854539.1	Baiap3	BAI1 associated protein 3 (Baiap3), transcript variant X2, mRNA	0.68	1.58	0.81	1.09	0.56	1.07	1.8	0.7	0.69	3.01	0.18	0.22	0.13	0.57	2.7	0.06	0.12	0.14	0.09	0.17
XM_028854540.2	Baiap3	BAI1 associated protein 3 (Baiap3), transcript variant X3, mRNA	1.09	0.7	0	0	0.32	0	0	0	0	0.47	0	0	0	0.13	0	0	0	0	0	0
XM_028854541.2	Klf15	Kruppel like factor 15 (Klf15), transcript variant X2, mRNA	0	0	0	0	0	0	0	0	0	0	0	0	0	0	0	0	0	0	0	0
XM_028854545.2	Unkl	unk like zinc finger (Unkl), mRNA	7.33	9.37	5.65	5.56	4.91	6.32	7.63	5.41	5.71	12.16	9.77	8.69	7.36	20.38	7.33	2.97	2.98	0.94	0.66	9.83
XM_028854546.2	Gnptg	N-acetylglucosamine-1-phosphate transferase subunit gamma (Gnptg), mRNA	8.97	10.38	7.68	7.71	7.3	9.23	12.74	7.41	7.8	12.81	8.74	17.73	8.86	15.23	9.98	11.19	11.09	3.22	0.99	19.11
XM_028854547.1	Tsr3	TSR3 ribosome maturation factor (Tsr3), transcript variant X1, mRNA	4	6.06	1.9	3.22	2.36	5.28	5.54	6.65	3.8	7.96	2.8	3.62	1.75	3.17	3.3	3.03	2.95	0	0	2.8
XM_028854548.2	Tsr3	TSR3 ribosome maturation factor (Tsr3), transcript variant X2, mRNA	2.94	1.71	1.87	2.83	3.09	1.39	3.42	0	3.31	2.21	2.73	1	1.8	4.55	3.79	1.43	1.59	2.33	1.11	1.45
XM_028854549.2	Wdr24	WD repeat domain 24 (Wdr24), mRNA	4.57	6.45	3.52	3.3	2.73	3.25	4.85	2.98	4.72	7.83	2.56	1.36	1.68	4.22	4.21	2.08	1.95	0.98	0.24	3.06
XM_028854550.2	Klf15	Kruppel like factor 15 (Klf15), transcript variant X3, mRNA	0	0	0	0	0	0	0	0	0	0	0	0	0	0	0	0	0	0	0	0
XM_028854552.2	Rhot2	ras homolog family member T2 (Rhot2), mRNA	14.69	23.64	11.77	13.5	13.92	16.4	20.34	14.31	14.15	29.27	9.23	6.88	5.29	14.55	12.83	8.26	8.1	2.46	1.62	11.1
XM_028854554.2	Rhbdl1	rhomboid like 1 (Rhbdl1), transcript variant X1, mRNA	0.31	0	0.62	0	0	0	0.91	0	0	0.61	0	0.05	0	0	0.28	0	0	0.49	0	0.2
XM_028854555.2	Rhbdl1	rhomboid like 1 (Rhbdl1), transcript variant X2, mRNA	2.89	1.78	0	0.67	2.3	0.97	0	2.6	0.84	1.69	0.94	0.52	0.27	0.57	1.13	0.23	0.87	0	0	0
XM_028854556.2	Rhbdl1	rhomboid like 1 (Rhbdl1), transcript variant X3, mRNA	0.11	2.32	1.92	1.87	0.17	1.85	3.1	0	2.02	2.78	1	2.09	2.02	5.26	3.71	1.19	1.13	0.23	0.33	3.05
XM_028854557.2	Stub1	STIP1 homology and U-box containing protein 1 (Stub1), mRNA	28.52	35.98	18.46	21.2	20.16	25.91	37.82	21.39	21.48	44.71	17.72	11.24	7.9	21.05	20.05	27.11	29.26	6.35	2.88	15.26
XM_028854558.2	Jmjd8	jumonji domain containing 8 (Jmjd8), transcript variant X2, mRNA	11.13	15.25	5.41	9.01	7.15	9.04	12.1	7.83	9.74	16.98	6.53	2.98	3.56	10.22	10.97	4.16	5.53	1.67	0.74	2.89
XM_028854559.2	Klf15	Kruppel like factor 15 (Klf15), transcript variant X4, mRNA	0	0.05	0.14	0.02	0.08	0.06	0.16	0.03	0	0.15	0.02	0.09	0.05	0.18	0.18	0	0.18	0.06	0.02	0.15
XM_028854561.2	Cramp1	cramped chromatin regulator homolog 1 (Cramp1), transcript variant X1, mRNA	3.91	6.87	2.97	3.24	4.14	5.04	4.24	2.65	4.26	8.96	3.21	4.7	3.55	6.44	2.18	2.62	2.97	0	0.38	6.25
XM_028854563.2	Msln	mesothelin (Msln), transcript variant X1, mRNA	0	0.65	0.05	0	2.14	1.3	0.7	1.8	0	0.6	1.56	0	0	0	1.11	2.64	2.12	0	0	0
XM_028854564.1	Msln	mesothelin (Msln), transcript variant X2, mRNA	0.08	0	0	0.29	0	0	0	0	0.09	0	0	0.19	0.03	0	0.38	0.24	0	0.31	0.08	0.12
XM_028854567.2	Ccdc78	coiled-coil domain containing 78 (Ccdc78), transcript variant X1, mRNA	0.8	1.24	0.47	0.54	0.41	0.53	1.25	0.72	0.61	1.45	0.42	0.31	0.32	0.89	0.94	0.17	0.13	0.18	0.04	0.27
XM_028854568.2	Ciao3	cytosolic iron-sulfur assembly component 3 (Ciao3), transcript variant X2, mRNA	11.91	16.01	8.55	10.59	10.53	11.84	15	9.47	10.15	20.57	9.48	9.11	5.59	11.82	10.02	8.14	10.14	2.43	0.05	10.94
XM_028854571.2	Haghl	hydroxyacylglutathione hydrolase like (Haghl), transcript variant X1, mRNA	0.21	0.39	0.24	0.16	0	0	0.14	0	0	0.34	0.11	0.06	0.12	0	0.05	0	0	0	0	0.06
XM_028854575.2	Metrn	meteorin, glial cell differentiation regulator (Metrn), mRNA	12.97	18.01	7.54	10.27	10.55	12.9	16.87	10.51	14.11	18.5	4.97	1.68	2.77	6.28	8.21	4.11	1.34	1.85	0.85	3.94
XM_028854576.2	Antkmt	adenine nucleotide translocase lysine methyltransferase (Antkmt), transcript variant X1, mRNA	2.41	2.96	1.85	1.63	1.46	1.64	2.83	1.13	1.14	2.24	1.17	0.41	1.21	1.92	3.38	0.91	0.41	0.87	0.22	0.67
XM_028854577.2	Antkmt	adenine nucleotide translocase lysine methyltransferase (Antkmt), transcript variant X2, mRNA	0.55	0.31	0.63	0.25	0.25	1.02	0.91	0.48	0.95	1.23	0	0.19	0	0.22	0.39	0	0	0.12	0	0
XM_028854578.2	Lmf1	lipase maturation factor 1 (Lmf1), transcript variant X1, mRNA	4.06	5.02	2.98	2.45	2.5	4.47	5.16	3.95	3.3	7.82	2.41	3.64	2.51	4.75	4.49	2.84	2.99	1.36	0.41	2.7
XM_028854579.2	Lmf1	lipase maturation factor 1 (Lmf1), transcript variant X2, mRNA	0	0	0	0	0	0	0.11	0	0	0	0	0	0	0	0	0	0	0	0	0
XM_028854580.2	Aldh1l1	aldehyde dehydrogenase 1 family member L1 (Aldh1l1), transcript variant X1, mRNA	0	0	0	0	0	0	0	0	0	0	0	0	0.02	0	0	0	0	0.14	0	0
XM_028854582.2	Rab40c	RAB40C, member RAS oncogene family (Rab40c), mRNA	7.55	9.36	5.06	5.99	5.92	9.41	7.85	5.84	7.24	13.23	7.9	6.69	5.44	11.29	7.11	5.95	7.71	1.66	0.76	9.28
XM_028854583.2	Mettl26	methyltransferase like 26 (Mettl26), mRNA	3.62	6.62	4.5	3.24	4.89	4.69	5.81	4.21	4.28	6.46	2.73	1.35	0.81	3.46	1.97	2.25	2.62	0.84	0.13	1.1
XM_028854584.2	Mcrip2	MAPK regulated corepressor interacting protein 2 (Mcrip2), transcript variant X2, mRNA	0.72	0	0.62	0	0.93	0.48	0	0	0.11	0.7	0	0	0	0	0.56	0.42	1.88	0.3	0.13	0.42
XM_028854585.1	Mcrip2	MAPK regulated corepressor interacting protein 2 (Mcrip2), transcript variant X3, mRNA	0	0.41	0	0.36	0.16	0	0.69	0.21	0.36	0	0	0.13	0.08	0.26	0	0.74	0	0	0	0
XM_028854586.2	Clcn7	chloride voltage-gated channel 7 (Clcn7), transcript variant X1, mRNA	8.25	13.23	10.01	6.74	7.09	9.3	11.03	7.64	8.22	17.77	18.58	47.82	28.81	62.79	35.35	17.26	23.29	4.86	1.75	45.37
XM_028854587.2	Aldh1l1	aldehyde dehydrogenase 1 family member L1 (Aldh1l1), transcript variant X2, mRNA	0	0	0	0	0	0	0	0	0	0	0.08	0	0	0	0	0	0	0	0	0
XM_028854588.2	Clcn7	chloride voltage-gated channel 7 (Clcn7), transcript variant X2, mRNA	0.04	0	0	0.07	0	0	0	0	0	0.08	0.15	0.21	0.09	0.54	0.02	0	0	0	0.14	0.18
XM_028854589.2	Ccdc154	coiled-coil domain containing 154 (Ccdc154), transcript variant X7, mRNA	0.74	1.63	0.25	0.65	0.59	0.63	0.54	0.63	0.39	2.13	2.83	7.71	5.96	14.94	5.82	2.16	0.29	1.3	0.48	6.2
XM_028854590.2	Ccdc154	coiled-coil domain containing 154 (Ccdc154), transcript variant X8, mRNA	0.58	0.22	0.76	0.36	0.21	0.38	0.4	0.33	0.36	0.61	4.28	7.24	4.55	14.63	5.68	1.26	1.55	0.49	0.04	5.93
XM_028854594.2	Cacna1h	calcium voltage-gated channel subunit alpha1 H (Cacna1h), transcript variant X2, mRNA	0	0.04	0	0.02	0	0.02	0.02	0	0.00586	0.1	0.05	0.02	0.02	0.08	0.01	0.01	0.00748	0	0	0.26
XM_028854599.2	Ube2i	ubiquitin conjugating enzyme E2 I (Ube2i), transcript variant X1, mRNA	7.48	7.91	4.71	6.87	4.43	8.14	7.11	6.14	6.28	16.12	5.45	6.5	2.96	12.69	6.27	5.26	7.23	2.5	0.65	14.04
XM_028854600.1	Ube2i	ubiquitin conjugating enzyme E2 I (Ube2i), transcript variant X3, mRNA	32.91	39.66	23.77	20.14	24.81	26.16	38.59	22.56	24.22	37.78	27.32	24.45	15.42	34.86	35.38	30.87	36.88	8.14	3.43	29.95
XM_028854601.2	Fbxl16	F-box and leucine rich repeat protein 16 (Fbxl16), mRNA	0.02	0.27	0.32	0.14	0.37	0.34	0.16	0.19	0.04	0.19	0.02	0	0.08	0.01	0.03	0.15	0.1	0	0	0.04
XM_028854602.1	Hagh	hydroxyacylglutathione hydrolase (Hagh), transcript variant X1, mRNA	5.53	13.78	17.05	17.17	23.45	23.74	3.9	5.66	19.13	23.27	13.22	10.3	14.56	3.15	19.63	8.97	14.74	16.33	12.66	5.81
XM_028854604.2	Hagh	hydroxyacylglutathione hydrolase (Hagh), transcript variant X8, mRNA	6.41	6.46	2.93	3.68	7.34	6.18	9.24	4.91	1.5	7.19	1.31	4	7.74	3.02	9.71	6.27	11.81	1.12	0	6.88
XM_028854605.2	Fahd1	fumarylacetoacetate hydrolase domain containing 1 (Fahd1), mRNA	4.34	6.02	5.3	4.51	5.89	7.32	5.21	3.84	3.8	6.68	3.65	2.77	2.68	5.52	4.87	4.46	6.44	2.32	0.87	4.08
XM_028854606.2	Pigq	phosphatidylinositol glycan anchor biosynthesis class Q (Pigq), transcript variant X1, mRNA	0	0	0	0	0	0	0	0	0	0	0	0	0	0	0	0	0	0	0	0
XM_028854607.2	Pigq	phosphatidylinositol glycan anchor biosynthesis class Q (Pigq), transcript variant X2, mRNA	2.14	7.42	6.56	8.38	9.49	5.09	2.33	1.55	5.02	9.9	3.6	4.64	4.72	3.14	8.81	3.51	2.56	3.22	1.77	2.02
XM_028854609.2	Pigq	phosphatidylinositol glycan anchor biosynthesis class Q (Pigq), transcript variant X3, mRNA	7.92	14.36	10.79	8.95	10.63	11.83	13.94	7.79	12	22.73	11.41	10.48	7.19	11.67	10.6	8.66	10.02	2.81	2.06	14.37
XM_028854610.2	Slc41a3	solute carrier family 41 member 3 (Slc41a3), transcript variant X1, mRNA	0.35	1.02	0.19	0.33	0.89	1.02	0.68	0.31	0.45	0.76	0.33	0.2	0.11	0.37	0.29	0.95	0.18	0.2	0.05	0.07
XM_028854611.2	Ptx4	pentraxin 4 (Ptx4), mRNA	0	0	0	0	0.02	0.03	0.08	0	0	0.15	0.01	0.15	0.03	0.03	0.1	0	0.07	0.07	0	0.22
XM_028854613.2	LOC114681228	mastin-like (LOC114681228), transcript variant X1, mRNA	0.43	0.47	0.31	1.25	0.88	0.12	0.67	0.99	1.49	0.85	3.35	1.8	2.09	2.5	2.41	0	0	0.96	0.29	1.1
XM_028854614.2	Percc1	proline and glutamate rich with coiled coil 1 (Percc1), mRNA	0.28	0.06	0	0	0	0	0.09	0	0	0.1	0.06	0.1	0.12	0.11	0.17	0.44	0.06	0	0	0.2
XM_028854616.2	LOC114681232	tryptase beta-2-like (LOC114681232), transcript variant X1, mRNA	0	0	0.18	1.63	0.97	0.06	0.16	0.41	0	0.25	0.41	0.13	0	0	0	0	0	0.11	0	0.5
XM_028854617.2	Slc41a3	solute carrier family 41 member 3 (Slc41a3), transcript variant X2, mRNA	0.04	0.25	0.18	0.39	0.19	0.38	0.39	0.14	0.42	0.57	0.26	0.04	0.09	0.14	0.14	0.56	0.05	0	0.08	0.28
XM_028854618.2	LOC114681232	tryptase beta-2-like (LOC114681232), transcript variant X2, mRNA	0	0	0	0.52	0.79	0.06	0	0	0.04	0.35	0.32	0.34	0	0.15	0.37	1.13	2.9	0.03	0	1.02
XM_028854619.2	LOC114681232	tryptase beta-2-like (LOC114681232), transcript variant X3, mRNA	0	0.3	0	0	1.59	0	0.8	0	1.06	0.44	0.85	0.55	0.35	0.16	1.14	3.08	9.05	0	0	1.36
XM_028854620.2	Jpt2	Jupiter microtubule associated homolog 2 (Jpt2), mRNA	8.14	9.1	6.02	6.24	7.77	7.14	8.33	5.59	6.51	13.44	8.68	8.74	5.67	13.73	11.99	19.2	29.1	2.24	1.42	10.39
XM_028854621.2	Sox8	SRY-box transcription factor 8 (Sox8), mRNA	0	0	0.04	0	0.04	0	0.02	0	0	0	0	0.03	0	0	0	0.02	0	0	0	0
XM_028854622.2	Nubp2	nucleotide binding protein 2 (Nubp2), mRNA	10.06	15.07	8.08	7.58	8.41	10.32	13.07	9.86	9.96	17.89	7.67	7.7	5.55	11.91	10.57	10.45	14.23	2.79	1.24	7.22
XM_028854623.2	Wdr90	WD repeat domain 90 (Wdr90), transcript variant X2, mRNA	0.7	0.7	0.4	0.57	0.42	0.74	0.41	0.19	0.38	1.01	0.11	0.18	0.21	0.2	1.34	0.12	0	0.08	0.14	0.49
XM_028854624.2	Prr35	proline rich 35 (Prr35), mRNA	0	0	0	0	0	0	0	0	0	0	0	0	0	0	0	0.03	0	0	0	0
XM_028854626.2	Decr2	2,4-dienoyl-CoA reductase 2 (Decr2), transcript variant X1, mRNA	0.39	0.24	0	0.42	0	0.56	0.6	0.26	0	0	0.07	0.23	0	0	0.22	0	0	0	0	0.38
XM_028854627.2	Decr2	2,4-dienoyl-CoA reductase 2 (Decr2), transcript variant X2, mRNA	0	0.44	0	0	0	0.43	0	0	0	0	0	0	0	0	0.13	0	0	0	0	0
XM_028854628.2	Decr2	2,4-dienoyl-CoA reductase 2 (Decr2), transcript variant X3, mRNA	0.2	0	0.51	0	0.71	0.56	0	0	0.54	0.51	0	0	0.12	0.29	0.31	0.35	0.12	0.51	0.06	0.78
XM_028854629.2	Nme4	NME/NM23 nucleoside diphosphate kinase 4 (Nme4), transcript variant X1, mRNA	1.07	3.06	1.48	1.06	1.16	1.09	2.07	1.71	1.99	2.06	0.45	0.11	0.28	0.37	1.89	1.32	0.71	0.29	0.19	0.29
XM_028854630.2	Nme4	NME/NM23 nucleoside diphosphate kinase 4 (Nme4), transcript variant X2, mRNA	0	0.19	0	0	0	0	0.2	0	0	0.24	0	0	0	0	0.28	0	0	0	0	0
XM_028854631.2	Tekt4	tektin 4 (Tekt4), mRNA	0	0	0	0	0.08	0	0	0	0	0	0	0	0	0	0	0	0	0	0	0
XM_028854632.2	Mapk8ip3	mitogen-activated protein kinase 8 interacting protein 3 (Mapk8ip3), transcript variant X1, mRNA	0	0	0	0	0	0	0	0	0	0	0	0	0	0	0	0	0	0	0	0
XM_028854633.1	Mapk8ip3	mitogen-activated protein kinase 8 interacting protein 3 (Mapk8ip3), transcript variant X2, mRNA	0	0	0	0	0	0	0	0	0	0	0	0	0	0	0	0	0	0	0	0
XM_028854634.2	Mapk8ip3	mitogen-activated protein kinase 8 interacting protein 3 (Mapk8ip3), transcript variant X3, mRNA	0	0	0	0	0	0	0	0	0	0	0	0	0	0	0	0	0	0	0	0
XM_028854635.2	Mapk8ip3	mitogen-activated protein kinase 8 interacting protein 3 (Mapk8ip3), transcript variant X4, mRNA	0	0	0	0	0	0	0	0	0	0	0	0	0	0	0	0	0	0	0	0
XM_028854636.2	Mapk8ip3	mitogen-activated protein kinase 8 interacting protein 3 (Mapk8ip3), transcript variant X5, mRNA	0	0	0	0	0	0	0	0	0	0	0	0	0	0	0	0	0	0	0	0
XM_028854637.2	Mapk8ip3	mitogen-activated protein kinase 8 interacting protein 3 (Mapk8ip3), transcript variant X6, mRNA	0	0	0	0	0	0	0	0	0	0	0	0	0	0	0	0	0	0	0	0
XM_028854638.1	Mapk8ip3	mitogen-activated protein kinase 8 interacting protein 3 (Mapk8ip3), transcript variant X7, mRNA	0	0	0	0	0	0	0	0	0	0	0	0	0	0	0	0	0	0	0	0
XM_028854639.2	Iqsec1	IQ motif and Sec7 domain ArfGEF 1 (Iqsec1), transcript variant X1, mRNA	0	0	0	0	0	0	0	0	0	0	0	0	0	0	0	0	0	0	0	0
XM_028854640.1	Mapk8ip3	mitogen-activated protein kinase 8 interacting protein 3 (Mapk8ip3), transcript variant X8, mRNA	0	0	0.1	0	0	0	0	0	0	0	0.01	0	0	0	0	0	0	0	0	0
XM_028854641.2	Mapk8ip3	mitogen-activated protein kinase 8 interacting protein 3 (Mapk8ip3), transcript variant X9, mRNA	0	0	0	0	0	0	0	0	0	0	0	0	0	0	0	0	0	0	0	0
XM_028854642.2	Mapk8ip3	mitogen-activated protein kinase 8 interacting protein 3 (Mapk8ip3), transcript variant X10, mRNA	0	0	0	0	0	0	0	0	0	0	0	0	0	0	0	0	0	0	0	0
XM_028854643.2	Mapk8ip3	mitogen-activated protein kinase 8 interacting protein 3 (Mapk8ip3), transcript variant X12, mRNA	0.19	0.19	0.06	0.22	0.1	0.08	0.23	0.24	0.2	0.19	0.06	0.02	0.16	0	0.08	0.1	0.14	0	0	0.11
XM_028854644.2	Mapk8ip3	mitogen-activated protein kinase 8 interacting protein 3 (Mapk8ip3), transcript variant X13, mRNA	0.58	1.15	0.71	0.42	0.36	0.56	0.72	0.46	0.34	1.53	0.46	0.54	0.59	1.22	0.77	0.4	0.2	0.09	0.08	0.46
XM_028854645.2	Mapk8ip3	mitogen-activated protein kinase 8 interacting protein 3 (Mapk8ip3), transcript variant X14, mRNA	0	0	0	0	0	0	0	0	0	0	0	0	0	0	0	0	0	0	0	0
XM_028854646.2	Mapk8ip3	mitogen-activated protein kinase 8 interacting protein 3 (Mapk8ip3), transcript variant X15, mRNA	0	0	0	0	0	0.02	0	0	0	0	0	0	0	0	0	0	0	0	0	0
XM_028854647.2	Mapk8ip3	mitogen-activated protein kinase 8 interacting protein 3 (Mapk8ip3), transcript variant X16, mRNA	0	0.02	0	0	0	0	0	0	0	0.03	0	0	0	0.02	0	0	0	0	0	0
XM_028854648.2	Mapk8ip3	mitogen-activated protein kinase 8 interacting protein 3 (Mapk8ip3), transcript variant X17, mRNA	0	0	0	0	0	0	0	0	0	0	0	0	0	0	0	0	0	0	0	0
XM_028854649.2	Mapk8ip3	mitogen-activated protein kinase 8 interacting protein 3 (Mapk8ip3), transcript variant X18, mRNA	0	0	0	0	0	0	0	0	0	0	0	0	0	0	0	0	0	0	0	0
XM_028854650.2	Iqsec1	IQ motif and Sec7 domain ArfGEF 1 (Iqsec1), transcript variant X2, mRNA	0	0.02	0	0	0	0	0	0	0	0	0	0	0	0	0	0	0	0	0	0
XM_028854651.2	Mapk8ip3	mitogen-activated protein kinase 8 interacting protein 3 (Mapk8ip3), transcript variant X19, mRNA	0	0	0	0	0	0	0	0	0	0	0	0	0	0	0	0	0	0	0	0
XM_028854652.2	Mapk8ip3	mitogen-activated protein kinase 8 interacting protein 3 (Mapk8ip3), transcript variant X20, mRNA	0	0	0	0	0	0	0	0	0	0	0.01	0	0	0	0	0	0	0	0	0
XM_028854653.2	Mapk8ip3	mitogen-activated protein kinase 8 interacting protein 3 (Mapk8ip3), transcript variant X21, mRNA	0.1	0.1	0.18	0.16	0.17	0.1	0.17	0.03	0.23	0.34	0.06	0.09	0.1	0.36	0	0	0.11	0	0.02	0.15
XM_028854654.2	Mapk8ip3	mitogen-activated protein kinase 8 interacting protein 3 (Mapk8ip3), transcript variant X22, mRNA	0.32	0.34	0.35	0.26	0.25	0.4	0.33	0.12	0.25	0.78	0.16	0.33	0.32	0.45	0.44	0.09	0.08	0.03	0.02	0.35
XM_028854655.2	Mapk8ip3	mitogen-activated protein kinase 8 interacting protein 3 (Mapk8ip3), transcript variant X23, mRNA	0.08	0.14	0	0.19	0.11	0.17	0.07	0.07	0.15	0.15	0.13	0.12	0.15	0.18	0.23	0.05	0.04	0.02	0.03	0.06
XM_028854656.2	Spsb3	splA/ryanodine receptor domain and SOCS box containing 3 (Spsb3), mRNA	10.34	13.47	9.42	7.83	8.39	10.09	14.24	8.64	11	18.83	9.87	8.98	6.26	15.22	12.64	9.14	9.76	3.51	1.66	10.66
XM_028854657.2	Eme2	essential meiotic structure-specific endonuclease subunit 2 (Eme2), transcript variant X1, mRNA	0	0	0	0	0	0	0	0	0	0	0	0	0.09	0	0	0	0	0	0	0
XM_028854658.2	Eme2	essential meiotic structure-specific endonuclease subunit 2 (Eme2), transcript variant X2, mRNA	0.2	0.57	0	0.14	0.19	0.16	0.22	0.15	0	0.21	0.13	0.5	0	0.77	0.83	0.23	0.04	0	0	0.77
XM_028854659.2	Eme2	essential meiotic structure-specific endonuclease subunit 2 (Eme2), transcript variant X3, mRNA	1.83	3.82	2.12	1.54	1.05	2.34	2.21	1.51	1.75	5.13	2.98	2.73	1.77	3.9	2.41	1.91	2.33	0.42	0.21	5.26
XM_028854660.2	Iqsec1	IQ motif and Sec7 domain ArfGEF 1 (Iqsec1), transcript variant X3, mRNA	1.22	3.74	3.2	1.46	3.18	2.71	3.05	1.38	3.24	5.05	0.39	0.45	1	1.66	0.87	0.82	1.87	0.06	0.24	0.1
XM_028854661.2	Mrps34	mitochondrial ribosomal protein S34 (Mrps34), mRNA	8.01	9.12	5.45	5.08	6.62	6.19	8.64	6.82	7	12.38	5.59	3.26	2.2	7.97	5.84	8.48	7.08	2.25	1.09	4.77
XM_028854662.1	Nme3	NME/NM23 nucleoside diphosphate kinase 3 (Nme3), mRNA	18.86	18.2	10.41	12.26	11.99	17.16	16.6	12.83	12.75	22.16	8.86	4.62	4.16	11.02	9.86	8.41	6.94	3.16	1.68	6.57
XM_028854663.2	Tpsg1	tryptase gamma 1 (Tpsg1), transcript variant X1, mRNA	0.34	0.39	0.05	0.08	0	0.09	0	0.16	0.06	0	0.7	1.52	1.35	4.28	1.39	0	0.1	0.2	0.02	0.8
XM_028854664.2	Tpsg1	tryptase gamma 1 (Tpsg1), transcript variant X2, mRNA	0	0.88	0.24	0.29	0.47	0.5	0.61	0.64	0.32	0.94	1.16	0.51	0	0.73	0	0.99	0.15	0	0.2	0.73
XM_028854666.2	Tpsb2	tryptase beta-2-like (LOC114681248), mRNA	0.24	2.2	0.39	3.42	3.69	3.59	2.09	0.74	2.51	8.03	29	36.55	5.17	9.29	17	24.49	4.4	8.37	0.98	97.52
XM_028854668.2	Rpusd1	RNA pseudouridine synthase domain containing 1 (Rpusd1), mRNA	2.59	3.91	2.9	2.64	2.15	2.79	3.77	2.28	1.68	5.19	1.66	0.89	1.22	3.35	2.86	2.44	1.98	0.63	0.28	2.78
XM_028854669.2	Iqsec1	IQ motif and Sec7 domain ArfGEF 1 (Iqsec1), transcript variant X4, mRNA	0	0	0	0	0	0	0.18	0	0.53	0	0	0	0	0	0	0	0	0	0	0
XM_028854671.2	C8BH16orf91	chromosome 8b C16orf91 homolog (C8BH16orf91), mRNA	10.12	12.56	7.25	6.14	5.77	8.85	14.52	7.06	9.44	13.4	9.64	8.41	5.92	12.65	9.68	7.09	11.48	3.82	1.34	12.75
XM_028854672.2	Capn15	calpain 15 (Capn15), transcript variant X1, mRNA	0	0	0	0.06	0	0	0	0.82	0	0	0	0	0.83	0.38	0.79	0	0	0	0.17	0
XM_028854674.2	Capn15	calpain 15 (Capn15), transcript variant X2, mRNA	0.14	1.17	0.59	0	1.07	0.33	0.15	0	0.28	0.58	0.47	0.15	0.58	0.35	0	0.13	0	0.17	0	0.22
XM_028854675.2	Capn15	calpain 15 (Capn15), transcript variant X3, mRNA	0.17	0	0.24	0.00696	0	0.16	0.13	0.1	0	0.67	0.04	0	0.05	0.11	0.23	0.18	0.16	0	0	0.00661
XM_028854676.2	Capn15	calpain 15 (Capn15), transcript variant X4, mRNA	4.99	6.45	3.03	4.21	3.16	5.04	7.09	2.62	5.24	8.73	2.09	1.85	1.11	4.14	4.11	2.21	3.04	0.96	0.61	2.42
XM_028854677.2	Iqsec1	IQ motif and Sec7 domain ArfGEF 1 (Iqsec1), transcript variant X5, mRNA	0	0	0.14	0	0	0	0	0	0	0.05	0	0	0	0.08	0	0.05	0	0	0	0
XM_028854678.2	Rab11fip3	RAB11 family interacting protein 3 (Rab11fip3), transcript variant X1, mRNA	0	0	0	0	0	0	0	0	0	0.2	0	0	0	0	0.65	0	0.23	0	0	0
XM_028854680.2	Rab11fip3	RAB11 family interacting protein 3 (Rab11fip3), transcript variant X2, mRNA	0.34	0	0	0	0	0.61	0	0	0.17	0.13	0	0	0	0	0	0	0	0	0	0.34
XM_028854681.2	Rab11fip3	RAB11 family interacting protein 3 (Rab11fip3), transcript variant X3, mRNA	0.44	1.22	0.52	1.14	1.06	0	1.22	0	1.01	1.18	0	0	0	0.76	0.24	0.55	0.78	0.26	0	0.14
XM_028854682.2	Gng13	G protein subunit gamma 13 (Gng13), transcript variant X2, mRNA	0	0.15	0	0	0	0	0	0	0	0	0	0	0	0.34	0	0	0	0	0	0.06
XM_028854683.1	Gng13	G protein subunit gamma 13 (Gng13), transcript variant X1, mRNA	0	0	0.26	0	0	0	0.29	0	0	0.06	0	0	0.15	0.14	0.17	0	0	0	0	0
XM_028854684.2	Chtf18	chromosome transmission fidelity factor 18 (Chtf18), transcript variant X1, mRNA	0.41	1.2	0.44	0.76	0.49	0.88	1.14	0.44	0.74	1.33	0	0.31	0.1	1.07	0.65	0.72	0.52	0.08	0.1	0.85
XM_028854685.2	Ift140	intraflagellar transport 140 (Ift140), transcript variant X1, mRNA	0	0	0.55	0.31	0	0	0.29	0	0	0	0	0.00909	0	0	0.37	0.81	0.34	0	0	0.68
XM_028854686.2	Ift140	intraflagellar transport 140 (Ift140), transcript variant X2, mRNA	1.2	1.13	0.17	0.9	0.67	0	0.45	0.41	0.48	0.19	0.22	0.26	0.15	0.18	0	0	0	0.28	0	0
XM_028854687.2	Iqsec1	IQ motif and Sec7 domain ArfGEF 1 (Iqsec1), transcript variant X7, mRNA	0	0	0	0	0	0	0	0	0	0	0	0	0	0	0	0	0	0	0	0
XM_028854688.2	Ift140	intraflagellar transport 140 (Ift140), transcript variant X3, mRNA	0.74	0.74	0.55	0.00976	0.4	0.77	0.35	0	0.93	1.37	0.84	0.39	0.67	0.28	0	0	0	0	0	0
XM_028854689.2	Ift140	intraflagellar transport 140 (Ift140), transcript variant X4, mRNA	6.61	10.02	6.53	4.52	5.38	8.52	7.95	4.91	5.72	12.15	3.7	3.05	2.4	6.44	6.16	1.75	2.86	1	0.64	3.96
XM_028854693.2	Tmem204	transmembrane protein 204 (Tmem204), mRNA	9.2	9.18	3.4	4.11	4.85	2.86	6.07	5.26	6.75	9.41	1.8	0.44	1.07	2.37	0.56	0.35	0.24	0.38	0.26	0.3
XM_028854694.2	LOC114681259	serine protease 29-like (LOC114681259), transcript variant X1, mRNA	0	0	0	0	0	0	0	0	0	0	0	0.38	0	0	0.11	0	0	0	0	0.54
XM_028854695.2	LOC114681260	serine protease 29-like (LOC114681260), transcript variant X1, mRNA	0	0.11	0	0.37	0.79	0.35	0	0	0.47	1.37	1.33	2.17	0.43	0	0.73	4.24	0.15	0.22	0.43	13.03
XM_028854696.2	Iqsec1	IQ motif and Sec7 domain ArfGEF 1 (Iqsec1), transcript variant X8, mRNA	0	0	0	0	0	0	0	0	0	0	0	0	0	0	0	0	0	0	0	0
XM_028854697.2	Meiob	meiosis specific with OB-fold (Meiob), mRNA	0.05	0	0.09	0.06	0	0	0	0	0	0.03	0	0	0	0	0.08	0.03	0	0	0	0
XM_028854698.1	Sstr5	somatostatin receptor 5 (Sstr5), mRNA	0	0	0	0	0	0	0	0	0	0	0	0	0	0	0	0	0	0	0	0
XM_028854699.2	LOC114681266	myelin associated oligodendrocyte basic protein (LOC114681266), transcript variant X1, mRNA	0	0	0	0	0	0	0	0	0	0	0	0	0	0	0	0	0	0	0	0
XM_028854700.2	Iqsec1	IQ motif and Sec7 domain ArfGEF 1 (Iqsec1), transcript variant X9, mRNA	0.63	0.68	0.6	0.13	0.44	0.55	0.24	0.54	0	0.94	0.91	1.22	0.75	1.84	0.93	0.32	0.31	0.65	0.59	2.15
XM_028854703.2	Ctnnb1	catenin beta 1 (Ctnnb1), transcript variant X1, mRNA	36.82	53.58	28.65	29.95	35.08	34.05	41.33	27.91	27.83	55.35	37.3	71.76	40.78	84.17	61.04	47.84	34.68	10.26	5.57	71.79
XM_028854705.2	Ctnnb1	catenin beta 1 (Ctnnb1), transcript variant X2, mRNA	6.07	7.5	6.29	6.66	7.19	7.97	7.87	6.76	8.2	9.32	8.95	16.21	11.72	16.68	10.87	16.44	13.72	4.01	1.38	22.08
XM_028854706.2	Ctnnb1	catenin beta 1 (Ctnnb1), transcript variant X3, mRNA	0	0	0	0	0	0	0	0	0	0	0	0	0	0	0	0	0	0	0	0
XM_028854707.2	Iqsec1	IQ motif and Sec7 domain ArfGEF 1 (Iqsec1), transcript variant X11, mRNA	1.74	4.74	2.11	2.98	2.37	3.26	3.11	2.19	3.22	6.39	5.35	10.12	7.01	13.59	4.32	1.71	2.11	0.55	0.23	18.26
XM_028854712.2	Entpd3	ectonucleoside triphosphate diphosphohydrolase 3 (Entpd3), transcript variant X1, mRNA	0	0	0.22	0	0	0	0	0	0	0	0	0	0	0	0	0	0	0	0	0
XM_028854713.2	Entpd3	ectonucleoside triphosphate diphosphohydrolase 3 (Entpd3), transcript variant X2, mRNA	0.57	0.71	0.44	0.52	0.75	0.83	1.08	0.72	0.7	1.58	1.25	1.15	0.5	2.06	1.47	0.73	1.24	0.28	0.08	0.75
XM_028854714.2	Rpl14	ribosomal protein L14 (Rpl14), mRNA	1479.23	1665.45	874.74	891.73	954.99	1043.58	1317.68	899.28	925.21	1422.31	629.15	307.27	337.53	771.39	661.71	555.01	747.28	351.11	125.82	290.63
XM_028854715.2	Xirp1	xin actin binding repeat containing 1 (Xirp1), mRNA	0	0	0.05	0.02	0.34	0	0.02	0	0	0.05	0	0	0	0.00887	0.03	0.06	0	0.05	0	0.02
XM_028854716.2	Slc25a38	solute carrier family 25 member 38 (Slc25a38), transcript variant X1, mRNA	0	0.13	0	0	0	0.88	1.31	0.7	0.45	0.71	0.19	0.23	0.07	0.18	0	0.16	1.17	0	0	0.55
XM_028854717.2	Slc25a38	solute carrier family 25 member 38 (Slc25a38), transcript variant X3, mRNA	1.35	2.77	1.44	1.09	1.68	1.24	1.66	0.78	0.88	2.95	1.13	0.53	1.57	1.26	1.9	1.14	0.53	0.45	0.25	0.54
XM_028854718.2	Nup210	nucleoporin 210 (Nup210), mRNA	37.62	71.47	29.44	31.74	33.78	36.99	47.89	27.59	37.74	80.49	20.41	10.81	14.39	31.63	25.77	12.18	12.61	5.72	3.11	13.29
XM_028854719.2	Cx3cr1	C-X3-C motif chemokine receptor 1 (Cx3cr1), transcript variant X1, mRNA	16.75	21.72	13.93	5.43	15.68	53.68	23.09	15.48	23.23	18.52	5.02	3.16	0.94	12.83	1.76	0.57	0.33	1.01	0.35	1.42
XM_028854720.2	Csrnp1	cysteine and serine rich nuclear protein 1 (Csrnp1), transcript variant X2, mRNA	0.15	0	1.84	0	0	3.25	1.94	3.61	0.43	2.33	5.65	6.04	4.6	13.02	7.99	8.72	7	3.06	1.2	10.99
XM_028854721.2	Csrnp1	cysteine and serine rich nuclear protein 1 (Csrnp1), transcript variant X1, mRNA	1.21	0.49	0	1.22	0	0	0	0	0	0	0	1.7	0	1.32	0	0	0	0	0	0
XM_028854722.2	Csrnp1	cysteine and serine rich nuclear protein 1 (Csrnp1), transcript variant X3, mRNA	0	0	0	0	0.34	0	0.39	0	0	0	0.94	0.26	0.51	0.5	1.55	0.15	0.36	0	0	0.5
XM_028854723.2	Csrnp1	cysteine and serine rich nuclear protein 1 (Csrnp1), transcript variant X6, mRNA	0	0.75	0	0.47	0.06	0	0	0	0.67	1.49	1.78	0.46	0	0	2.01	0	0	0	0	0.53
XM_028854724.2	Rpsa	ribosomal protein SA (Rpsa), mRNA	871.72	1049.5	537.35	615.19	617.66	823.47	917.1	613.51	691.78	1064.66	413.22	216.28	207.42	501.06	430.59	480.23	646.63	212.31	92.87	331.16
XM_028854725.2	Myrip	myosin VIIA and Rab interacting protein (LOC114681281), mRNA	0.09	0.23	0.11	0.1	0.43	0.09	0.13	0.05	0	0.18	0	0.03	0	0.03	0.05	0	0.02	0.03	0	0.01
XM_028854726.2	Eif1b	eukaryotic translation initiation factor 1B (Eif1b), mRNA	22.99	24.09	13.45	16.03	19.93	16.92	24.49	16.43	16.24	29.47	16.48	14.88	10.13	23.45	21.64	17.08	21.35	7.12	2.88	20.75
XM_028854727.2	LOC114681284	zinc finger protein 621-like (LOC114681284), transcript variant X1, mRNA	1	2.04	0.81	0.76	0.39	0.68	1.14	0.42	1.12	1.85	0.71	0.55	0.44	0.97	1.33	0.29	0.54	0.25	0	0.39
XM_028854729.2	Ccr8	C-C motif chemokine receptor 8 (Ccr8), transcript variant X1, mRNA	0	0	0.41	0.68	0.57	0	0	0	0	0.57	0	0	0	0.3	0.66	0	0	0	0	0
XM_028854730.2	Ttc21a	tetratricopeptide repeat domain 21A (Ttc21a), mRNA	0	0	0	0.05	0.04	0	0.11	0	0	0	0.01	0	0.03	0	0.05	0.01	0.01	0	0	0.01
XM_028854731.2	Hdac11	histone deacetylase 11 (Hdac11), transcript variant X1, mRNA	0	0.31	0.36	0.09	0.34	0.05	0.13	0.23	0.11	0.06	0.05	0	0.05	0	0.08	0.02	0.02	0	0	0
XM_028854732.2	Wdr48	WD repeat domain 48 (Wdr48), transcript variant X1, mRNA	0	0	0	0	0	0	0	0	0	0	0	0	0	0	0	0	0	0	0	0
XM_028854733.2	Wdr48	WD repeat domain 48 (Wdr48), transcript variant X2, mRNA	0	0	0	0	0	0	0	0	0	0	0	0	0	0	0	0	0	0	0	0
XM_028854734.2	Wdr48	WD repeat domain 48 (Wdr48), transcript variant X3, mRNA	1.78	3.74	1.76	1.83	1.27	0.14	2.87	1.03	1.77	3.42	0.05	0.95	1.24	2.51	2.47	2.38	0.75	0	0	1.51
XM_028854735.2	Wdr48	WD repeat domain 48 (Wdr48), transcript variant X5, mRNA	9.36	11.66	7.81	6.75	8.03	11.3	11.67	7.08	8.25	15.4	7.22	6.76	5.04	11.8	7.79	6.09	11.52	2.26	1.26	10.22
XM_028854736.2	Gorasp1	golgi reassembly stacking protein 1 (Gorasp1), transcript variant X1, mRNA	1.39	1.62	1.94	1.76	2.38	3.39	2.97	1.5	1.69	2.92	0.65	0.62	1.15	1.4	2.43	0.96	1.9	0.46	0.29	1.26
XM_028854737.2	Gorasp1	golgi reassembly stacking protein 1 (Gorasp1), transcript variant X2, mRNA	1	1	0.36	0.32	0.19	1.8	0.3	0.88	2.12	1.31	1.26	0.37	0.15	0.74	0	1.4	0.65	0	0	0.1
XM_028854738.2	Hdac11	histone deacetylase 11 (Hdac11), transcript variant X2, mRNA	0	0	0.31	0.1	0	0	0.26	0.15	0	0	0	0	0	0.05	0.12	0	0	0	0.1	0
XM_028854739.2	LOC114681294	far upstream element-binding protein 1-like (LOC114681294), mRNA	0	0	0	0	0.77	0.03	0.02	1.44	0.66	1.96	1.73	1.1	0.38	1.35	0.03	1.21	2.63	0	0.17	1.03
XM_028854740.2	Foxn4	forkhead box N4 (Foxn4), transcript variant X1, mRNA	0.00739	0	0	0	0	0.08	0	0.01	0	0	0	0	0	0	0	0	0	0	0.00955	0
XM_028854741.2	Foxn4	forkhead box N4 (Foxn4), transcript variant X2, mRNA	0.14	0.05	0.09	0.17	0.06	0	0.04	0.23	0.09	0.21	0.04	0.13	0.07	0.21	0.16	0.06	0	0.04	0	0.1
XM_028854742.2	Fbln2	fibulin 2 (Fbln2), transcript variant X1, mRNA	0.34	0.87	0.56	0.49	2.46	0.85	1.27	0.51	0.64	1.11	0.49	0.42	0.32	0.68	0.93	1.12	0.7	0.27	0.1	0.46
XM_028854743.2	Pla2g1b	phospholipase A2 group IB (Pla2g1b), transcript variant X1, mRNA	0	0	0	0	0	0	0	0	0	0	0	0	0	0	0	0	0	0	0	0
XM_028854745.2	Ankrd13a	ankyrin repeat domain 13A (Ankrd13a), transcript variant X1, mRNA	4.39	5.47	4.95	3.8	4.07	4.38	5.59	3.52	3.7	10.93	2.79	4.71	1.74	7.26	4.67	2.36	4.04	0.28	0.41	6.55
XM_028854746.2	Ankrd13a	ankyrin repeat domain 13A (Ankrd13a), transcript variant X2, mRNA	51.38	66.05	54.38	35.52	51.3	60.56	78.77	46.26	51.8	103.75	51.3	55.21	30.24	66.62	39.21	34.15	56.79	15.19	5.04	68.77
XM_028854747.2	Rnf10	ring finger protein 10 (Rnf10), transcript variant X1, mRNA	198.05	298.98	389.68	518.92	431.11	515.94	171.83	190.57	322.55	494.74	294.96	246.25	395.73	205.36	329.21	229.71	238.71	231.21	299.6	289.77
XM_028854748.2	Rnf10	ring finger protein 10 (Rnf10), transcript variant X2, mRNA	19.32	26.73	41.8	44.49	43.97	51.71	18.9	22.6	24.17	48.87	27.87	23.28	49.35	24.62	35.17	23.94	24.94	23.79	29.86	32.13
XM_028854749.2	Fbln2	fibulin 2 (Fbln2), transcript variant X2, mRNA	0	0	0	0	0	0	0	0	0	0	0	0	0	0	0.03	0	0	0	0	0
XM_028854750.2	Ube3b	ubiquitin protein ligase E3B (Ube3b), mRNA	10.15	15.1	9.35	9.47	10.71	13.48	14.58	9.23	11.39	22.08	11.99	15.29	10.09	21.46	12.07	10.76	10.43	3.34	1.57	21.45
XM_028854753.2	Mlec	malectin (Mlec), mRNA	26.6	39.22	19.15	22.6	24.97	26.82	27.75	15.13	22.8	37.38	13.28	9.27	10.75	22.28	22.78	15.11	17.68	3.24	2.37	15.62
XM_028854754.1	Cabp1	calcium binding protein 1 (Cabp1), transcript variant X1, mRNA	0	0	0.03	0	0	0	0	0	0	0	0	0	0	0	0	0.04	0	0	0	0
XM_028854755.2	Cabp1	calcium binding protein 1 (Cabp1), transcript variant X2, mRNA	11.77	17.52	14.76	5.31	20.02	3.3	6.25	8.1	6.45	5.32	3.72	3.7	12.93	5.33	16.81	7.25	5.47	3.51	4.07	6.68
XM_028854756.2	Fbln2	fibulin 2 (Fbln2), transcript variant X3, mRNA	0	0.07	0	0	0.11	0	0.17	0	0	0	0	0	0	0	0	0	0	0	0	0.07
XM_028854757.2	Mvk	mevalonate kinase (Mvk), mRNA	10.29	13.37	4.3	9.73	3.4	11.45	7.56	9.07	11.93	22.13	3.89	14.23	11.62	13.78	10.32	8.34	9.09	2.37	1.29	22.36
XM_028854758.2	Mmab	metabolism of cobalamin associated B (Mmab), transcript variant X1, mRNA	1.3	1.92	1.62	1.08	1.23	1.38	2.56	0.66	1.53	3.39	1.13	0.82	0.93	2.08	2.63	1.64	2.57	0	0.46	3.95
XM_028854759.2	Mmab	metabolism of cobalamin associated B (Mmab), transcript variant X3, mRNA	0	1.02	0	0.22	0.32	0.29	0	0.65	0.89	0.47	0.18	0.83	0.23	0.69	0.63	0.27	0	0	0.04	1.09
XM_028854760.2	Mmab	metabolism of cobalamin associated B (Mmab), transcript variant X4, mRNA	0	0	0	0	0.1	0	0	0	0	0	0	0	0	0	0	0.06	0.28	0.39	0	0
XM_028854761.2	Coq5	coenzyme Q5, methyltransferase (Coq5), mRNA	7.43	8.35	5.48	5.25	6.07	6.71	7.63	5.87	6.22	10.9	6.46	4.73	3.48	7.95	7.67	6.95	8.02	2.19	0.82	5.29
XM_028854762.2	Dynll1	dynein light chain LC8-type 1 (Dynll1), mRNA	104.72	121.21	81.94	103.69	111.34	136.99	108.77	72.61	80.18	130.97	99.35	60.9	55.67	108.26	96.43	89.09	114.46	39.51	29.7	58.99
XM_028854763.2	Unc119b	unc-119 lipid binding chaperone B (Unc119b), mRNA	23.46	27.48	18.88	15.19	20.8	20.38	26.43	15.21	19.53	36.95	13.57	13.73	10.64	23.8	17.91	7.29	9.47	4.89	2.24	13.15
XM_028854765.2	Myo1h	myosin IH (Myo1h), mRNA	0	0	0.02	0	0	0.03	0.03	0.02	0.03	0.02	0.08	0.04	0.00888	0.05	0.05	0	0.02	0	0	0.02
XM_028854766.2	Kctd10	potassium channel tetramerization domain containing 10 (Kctd10), transcript variant X1, mRNA	0.48	2.55	0	1.21	0.85	2.24	2	1.05	1.89	2.16	2.09	0.99	2.09	4.68	3.15	1.23	1.84	0.37	0.91	2.42
XM_028854767.2	Kctd10	potassium channel tetramerization domain containing 10 (Kctd10), transcript variant X2, mRNA	10.42	13.31	9.23	8.08	9.95	11.17	14.75	8.8	11.1	18.66	9.51	18.08	8.58	16.03	11.51	20.47	21.02	3.78	0.78	23.99
XM_028854768.2	Rest	RE1 silencing transcription factor (Rest), mRNA	6.74	15.67	7.87	8.84	10.95	9.56	10.75	4.59	9.09	18.02	6.13	6.62	5.1	13.66	6.88	4.65	4.93	0.85	0.68	9.32
XM_028854769.2	Wnt7a	Wnt family member 7A (Wnt7a), mRNA	0	0	0.02	0	0	0	0	0	0	0	0	0	0	0.02	0	0	0	0	0	0
XM_028854770.2	Triap1	TP53 regulated inhibitor of apoptosis 1 (Triap1), mRNA	12.92	13.62	10.9	9.67	10.71	11.72	14.97	10.62	10.83	16.33	10.01	9.87	7.83	15.9	11.29	9.82	13.6	3.39	1.05	10.08
XM_028854771.2	Gatc	glutamyl-tRNA amidotransferase subunit C (Gatc), mRNA	11.68	11.03	10.25	8.64	10.53	13.87	14.48	9.05	10.78	17.48	9.82	8.89	4.3	11.27	7.46	7.53	11.95	3.7	1.22	9.32
XM_028854772.2	Srsf9	serine and arginine rich splicing factor 9 (Srsf9), mRNA	29.08	30.29	22.56	20.75	23.18	27.96	32.33	26	25.15	39.81	38.23	54.92	26.41	80.46	36.8	18.91	26.79	9.7	4.53	62.1
XM_028854773.2	Fam222a	family with sequence similarity 222 member A (Fam222a), mRNA	0.16	0.17	0.19	0.06	0.11	0.12	0.23	0.18	0.2	0.22	0.11	0.07	0.11	0.16	0.15	0.07	0.06	0.01	0	0.11
XM_028854776.2	LOC114681327	glycolipid transfer protein (LOC114681327), mRNA	24.2	32.43	19.47	22.67	21.45	30.18	34.68	21.59	24.83	40.39	20.75	11.94	9.77	24.01	11.89	13.86	17.98	5.65	3.26	15.42
XM_028854778.2	Acads	acyl-CoA dehydrogenase short chain (Acads), mRNA	9.19	10.23	6.9	6.49	7.91	10.94	10.83	7.44	8.69	14.28	6.46	8.14	3.05	9.5	6.02	5.78	6.83	2.91	0.85	9.47
XM_028854779.2	Oas2	2'-5'-oligoadenylate synthase-like protein 2 (LOC114681329), transcript variant X1, mRNA	5.49	12.78	30.98	8.38	2.22	30.72	27.51	24.19	1.86	109.78	100.9	175.7	35.52	276.25	68.18	12.06	138.32	29.93	4.47	125.18
XM_028854780.2	Oas2	2'-5'-oligoadenylate synthase-like protein 2 (LOC114681329), transcript variant X2, mRNA	1.24	0.78	0	1.13	0.19	1.54	1.74	2.54	0.22	0.39	0.12	0.53	0.6	3.78	2.26	1.07	0	6.72	0	8.5
XM_028854781.2	C23H12orf43	chromosome 23 C12orf43 homolog (C23H12orf43), transcript variant X1, mRNA	2.33	1.82	0.88	2.07	1.7	2.37	2.34	1.6	1.24	3.19	1.88	0.9	0.62	1.8	1.26	0.55	3.62	1.15	0.24	1.44
XM_028854782.2	C23H12orf43	chromosome 23 C12orf43 homolog (C23H12orf43), transcript variant X2, mRNA	1.92	2.68	1.83	0.47	0.93	2.22	3.18	1.95	1.81	2.98	1.49	0.7	0.66	2.75	1.62	2.27	1.62	0	0.11	1.29
XM_028854784.1	LOC114681332	cytochrome c oxidase subunit 6A1, mitochondrial (LOC114681332), mRNA	68.17	91.82	65.56	66.19	67.04	111.91	110.92	73.02	87.16	126.84	82.93	82.85	45.61	97.21	73.24	95.5	129.19	44.05	21.45	134.24
XM_028854785.2	LOC114681333	trichoplein keratin filament binding (LOC114681333), transcript variant X1, mRNA	4.29	7.18	2.76	8.76	3.68	6.15	3.86	3.37	4.22	4.38	4.07	2.63	2.7	3.46	6.06	2.97	1.11	2.17	1.73	3.24
XM_028854786.2	LOC114681335	phospholipase A2-like (LOC114681335), mRNA	0	0	0	0	0	0	0	0.07	0	0	0	0	0.05	0	0	0	0	0	0	0
XM_028854787.2	Trpv4	transient receptor potential cation channel subfamily V member 4 (Trpv4), transcript variant X1, mRNA	0	0.13	0.02	0	0.13	0.25	0	0.23	0	0	0.16	0.02	0	0	0	0.06	0.22	0	0	0
XM_028854789.2	Xpc	XPC complex subunit, DNA damage recognition and repair factor (Xpc), transcript variant X1, mRNA	21.01	27.63	12.42	16.73	13.23	14.51	22.4	13.19	17.43	27.71	7.94	4.33	6.36	15.49	10.02	3.72	4.81	1.94	1.43	5.06
XM_028854790.2	Oas1	2'-5'-oligoadenylate synthase-like protein 1 (LOC114681337), mRNA	5.95	10	13.31	11.73	1.25	11.72	11.31	11.68	2.28	31.43	34.07	50.29	21.77	59.36	38.97	109.37	146.11	19.81	5.3	37.12
XM_028854791.2	Pop5	POP5 homolog, ribonuclease P/MRP subunit (Pop5), mRNA	6.54	7.65	3.57	5.72	4.73	4.4	7.37	4.05	4.24	9.13	5.72	2.06	2.95	5.11	5.87	4.74	7.21	2.2	2.1	2.22
XM_028854792.2	Sppl3	signal peptide peptidase like 3 (Sppl3), mRNA	11.85	13.51	8.96	8.35	11.3	11.21	13.9	8.53	10.73	18.43	10.06	10.73	7.54	15.1	12.21	12.44	13.9	3.61	1.92	16.75
XM_028854793.2	Git2	GIT ArfGAP 2 (Git2), transcript variant X1, mRNA	0	0	0	0	0	0	0	0	0	0	0	0	0	0	0	0	0	0	0	0
XM_028854794.2	Git2	GIT ArfGAP 2 (Git2), transcript variant X2, mRNA	0	0	0	0	0	0	0	0	0	0	0	0	0	0	0	0	0	0	0	0
XM_028854795.2	Git2	GIT ArfGAP 2 (Git2), transcript variant X3, mRNA	0	0	0	0	0.75	0	0	0	0	0.87	0	0	0	0.98	0	1.15	4	0	1.39	1.7
XM_028854796.2	Git2	GIT ArfGAP 2 (Git2), transcript variant X4, mRNA	6.51	4.6	1.4	4.4	4.6	4.41	5.91	6.29	2.09	5.39	2.11	3.45	2.34	4.73	4.48	1.74	0.5	0	0	1.93
XM_028854797.2	Git2	GIT ArfGAP 2 (Git2), transcript variant X5, mRNA	0.26	1.08	0.52	0.33	0.52	0.94	0.85	0.37	0.11	0.21	0.64	0.29	0	1.44	0.78	0.4	0.55	0	0	1.42
XM_028854798.2	Xpc	XPC complex subunit, DNA damage recognition and repair factor (Xpc), transcript variant X2, mRNA	1.85	4.44	0.39	1.35	0.79	1.36	1.58	0.42	1.66	6.57	0.4	0.27	0.53	2.42	1.67	0	0.15	0	0	0.71
XM_028854799.2	Git2	GIT ArfGAP 2 (Git2), transcript variant X6, mRNA	0	0	0	0	0	0	0	0	0	0	0	0	0	0	0	0	0	0	0	0
XM_028854800.2	Git2	GIT ArfGAP 2 (Git2), transcript variant X7, mRNA	8.8	10.14	9	5.54	4.72	8.97	8.17	3.33	8.94	11.68	6.95	4.05	6.83	11.21	9.07	3.07	3.21	2.09	0.16	10.44
XM_028854801.2	Git2	GIT ArfGAP 2 (Git2), transcript variant X8, mRNA	0	0	0	0	0	0	0	0	0	0	0	0	0	0	0	0	0	0	0	0
XM_028854802.2	Git2	GIT ArfGAP 2 (Git2), transcript variant X9, mRNA	0	2.09	2.09	0	0	2.52	0.86	0	3.05	3.77	1.9	1.05	1.2	2.49	0.71	0.67	1.72	1.2	0	4.69
XM_028854804.2	Git2	GIT ArfGAP 2 (Git2), transcript variant X10, mRNA	0	0	0	0	0	0	0	0	0	0	0	0	0	0	0	0	0	0	0	0
XM_028854805.2	Git2	GIT ArfGAP 2 (Git2), transcript variant X11, mRNA	0	0	0	0	0	0	0	0	0.31	0	0	0	0	0	0	0	0	0	0	0
XM_028854806.2	Git2	GIT ArfGAP 2 (Git2), transcript variant X12, mRNA	4.83	6.59	2.35	5.5	4.05	4.61	4.52	4.97	3.46	6.76	2.12	5.81	3.1	5.22	5.38	1.83	0.11	0.38	0.25	6.73
XM_028854807.1	Fgfr1	fibroblast growth factor receptor 1 (Fgfr1), transcript variant X4, mRNA	0	0	0.11	0	0	0	0	0	0	0	0.04	0	0	0	0.52	0.77	1.14	0	0	0
XM_028854808.1	Fgfr1	fibroblast growth factor receptor 1 (Fgfr1), transcript variant X5, mRNA	0	0	0	0	0	0	0	0	0	0.08	0.09	0	0	0	0	0.03	0	0	0	0
XM_028854809.1	Fgfr1	fibroblast growth factor receptor 1 (Fgfr1), transcript variant X7, mRNA	0.02	0	0.02	0.24	0.66	0.19	0.06	0	0.04	0	0.13	0.4	0.03	0.24	0.36	0.96	2.27	0	0	0.12
XM_028854810.1	Fgfr1	fibroblast growth factor receptor 1 (Fgfr1), transcript variant X9, mRNA	0.02	0	0.05	0.43	0.09	0	0.28	0	0.11	0	0.07	0.26	0.01	0	0	0	1.5	0.11	0.01	0
XM_028854811.1	Fgfr1	fibroblast growth factor receptor 1 (Fgfr1), transcript variant X10, mRNA	0	0	0	0	0.2	0	0	0	0	0.2	0.11	0	0.11	0	0	0	0	0.35	0.08	0
XM_028854812.2	Fgfr1	fibroblast growth factor receptor 1 (Fgfr1), transcript variant X1, mRNA	0.16	0	0.13	0.16	0.38	0.18	0	0	0	0	0	0	0	0	0	0	0	0	0	0
XM_028854813.2	Fgfr1	fibroblast growth factor receptor 1 (Fgfr1), transcript variant X12, mRNA	0	0.15	0	0	0.21	0.12	0.12	0	0.05	0	0	0.2	0	0.19	0	0.64	1.32	0	0	0.09
XM_028854814.2	Tmem43	transmembrane protein 43 (Tmem43), mRNA	22.14	26.25	17.97	24.5	27	29.83	29.38	27.12	22.13	52.7	25.23	25.15	11.89	37.37	19.57	15.47	18.36	3.86	2.2	31.2
XM_028854816.2	Rnf170	ring finger protein 170 (Rnf170), transcript variant X1, mRNA	2.46	2.32	2.78	2.54	1.99	2.63	2.72	1.52	0.91	2.78	1.16	1.42	0.38	2.19	1.8	1.75	1.94	0	0	2.83
XM_028854817.2	Rnf170	ring finger protein 170 (Rnf170), transcript variant X2, mRNA	1.11	3.74	2.42	0.7	1.37	1.66	1.41	1.06	3.05	3.38	1.75	1.09	0.96	2.31	1.96	0	0.64	0	0.17	1.6
XM_028854818.2	Rnf170	ring finger protein 170 (Rnf170), transcript variant X3, mRNA	0.77	0	0.52	0	0	0	0.28	0.77	0	0	0	0	0	0	0	0	0	0	0	0
XM_028854819.2	Rnf170	ring finger protein 170 (Rnf170), transcript variant X5, mRNA	0	1.25	0	0.25	1.21	0	0.33	0	0	0.54	0	0.24	0.58	0.61	0.02	0	0	0.81	0.18	0
XM_028854820.2	Rnf170	ring finger protein 170 (Rnf170), transcript variant X4, mRNA	0	0.76	0	0.19	0	0	0.97	0.46	0.53	0.62	0.33	0	0.3	0	0	0.5	0	0	0	0.83
XM_028854822.2	Hgsnat	heparan-alpha-glucosaminide N-acetyltransferase (Hgsnat), transcript variant X1, mRNA	9.01	4.83	3.03	6.29	8.85	10.79	4.04	4.13	2.71	5.43	0.7	3.64	1.31	7.51	2.93	5.64	6.32	0.49	0.48	1
XM_028854823.2	Hgsnat	heparan-alpha-glucosaminide N-acetyltransferase (Hgsnat), transcript variant X2, mRNA	1.43	0	0	0	0.03	0	0	0	0	0	1.21	0.56	0	0	0	0	0	0.23	0	0
XM_028854824.2	Ash2l	ASH2 like, histone lysine methyltransferase complex subunit (Ash2l), transcript variant X1, mRNA	0.09	6.59	0.28	1.67	0.86	0.53	2.39	0.6	4.56	4.56	2.05	0.4	0	0	0.45	0	0	1.18	0	0.49
XM_028854825.2	Ash2l	ASH2 like, histone lysine methyltransferase complex subunit (Ash2l), transcript variant X2, mRNA	3.54	2.38	2.02	1.92	3.63	4.85	4.14	1.78	0.83	3.02	1.36	2.34	1.6	3.86	2.11	3.69	1.85	0	0	1.63
XM_028854826.2	Chchd4	coiled-coil-helix-coiled-coil-helix domain containing 4 (Chchd4), mRNA	7.33	7.7	3.93	5.03	6.97	5.2	7.13	6.67	6.05	10.73	5.52	3.92	2.32	8.38	6.91	7.91	13.56	1.91	1.1	3.61
XM_028854827.2	Ash2l	ASH2 like, histone lysine methyltransferase complex subunit (Ash2l), transcript variant X3, mRNA	1.83	3.74	1.84	1.38	1.35	0.87	5.13	1.14	5.37	2.73	0.63	0	0	1.11	3.38	0	1.86	1.07	0	0.83
XM_028854828.2	Ash2l	ASH2 like, histone lysine methyltransferase complex subunit (Ash2l), transcript variant X4, mRNA	9.17	12.26	9.85	6.49	8.19	8.75	11.38	8.17	5.13	15.64	6.2	2.79	3.68	8.98	7.56	7.47	10.86	0	1.31	5.68
XM_028854830.2	Ddhd2	DDHD domain containing 2 (Ddhd2), transcript variant X1, mRNA	4.6	10.82	5.99	4.46	5.93	4.96	7.06	3.63	4.64	10.56	2.66	1.49	2.01	5.61	5.19	3.1	3.38	0.09	0.09	1.95
XM_028854831.2	Plpp5	phospholipid phosphatase 5 (Plpp5), mRNA	7.11	8.02	5.91	4.92	5.23	7.25	8.48	4.94	5.7	11.43	5.45	3.97	3.76	8.98	6.21	5.88	7.17	1.43	0.58	5.96
XM_028854832.2	Nsd3	nuclear receptor binding SET domain protein 3 (Nsd3), mRNA	9.49	14.66	7.56	7.48	8.35	9.18	10.72	6.12	8.45	16.69	7.87	9.41	7.12	16.2	11.48	4.85	5.74	2.07	1.19	10.85
XM_028854833.2	Letm2	leucine zipper and EF-hand containing transmembrane protein 2 (Letm2), mRNA	4.5	7.6	4.6	3.81	4.27	4.33	7.24	4.2	5.03	8.95	4.12	3.74	4.97	8.56	7.65	1.54	1.38	1.36	0.57	5.01
XM_028854834.2	Fnta	farnesyltransferase, CAAX box, alpha (Fnta), mRNA	19.6	26.95	16.62	19.42	17.02	25.74	29.37	19.35	23.47	35.25	21.68	15.39	11.21	38.21	16.27	15.79	20.7	6.25	2.52	23.45
XM_028854835.2	Bag4	BAG cochaperone 4 (Bag4), transcript variant X1, mRNA	4.63	0	0.25	2.26	3.15	1.89	0.09	1.31	0.3	0.37	0	1.8	0.35	0	0.43	2.22	2.11	0.64	0.18	0.11
XM_028854836.2	Lsm1	LSM1 homolog, mRNA degradation associated (Lsm1), mRNA	6.41	7.76	5.49	4.73	5.13	5.1	6.75	3.51	4.32	10.95	5.32	3.17	2.85	6.59	5.5	4.82	6.7	1.59	0.43	4.44
XM_028854838.2	Lsm3	LSM3 homolog, U6 small nuclear RNA and mRNA degradation associated (Lsm3), mRNA	15.22	15.84	11.5	9.41	11.04	13.74	17.58	13.07	14.43	14.79	12.13	7.51	6.07	15.74	15.49	15.5	17.22	3	1.36	11.41
XM_028854839.2	Pomk	protein O-mannose kinase (Pomk), transcript variant X1, mRNA	2.77	4.89	2.08	1.71	2.47	3.6	4.73	1.79	2.94	5.05	1.5	0.84	1.2	1.84	2.59	0.57	0.82	0	0.25	0
XM_028854841.2	Thap1	THAP domain containing 1 (Thap1), mRNA	5.26	12.14	6.88	4.53	6.57	6.85	8.28	4.07	6.4	11.16	7.08	6.72	4.41	10.1	8.83	3.97	5.84	1.4	0.77	9.71
XM_028854842.2	Star	steroidogenic acute regulatory protein (Star), mRNA	0.35	0.62	0.6	0.44	0.64	0.36	1.33	0.41	1.21	0.91	0.37	0.5	0.37	0.75	0.92	0.25	0.21	0.14	0.17	0.4
XM_028854843.2	Tacc1	transforming acidic coiled-coil containing protein 1 (Tacc1), mRNA	18.18	26.67	15.68	15.64	18.44	20.11	21.21	12.3	18.36	29.89	12.26	12.31	9.47	24.29	13.17	8.44	8.31	2.75	2.04	17.89
XM_028854844.2	Hook3	hook microtubule tethering protein 3 (Hook3), transcript variant X1, mRNA	0	0	0	0	0.02	0	0.00899	0	0	0	0	0	0	0	0	0	0	0	0	0
XM_028854845.2	Hook3	hook microtubule tethering protein 3 (Hook3), transcript variant X2, mRNA	0.18	0.4	0.1	0	0.12	0	0.77	0.3	0.28	0	0.9	0.86	0.34	0.51	0.38	0.15	0	0	0	0.69
XM_028854846.2	Hook3	hook microtubule tethering protein 3 (Hook3), transcript variant X3, mRNA	0	0	0	0.22	0.09	0	0.18	0	0.55	0	0	0	0	0	0	0	0	0	0	0
XM_028854847.2	Hook3	hook microtubule tethering protein 3 (Hook3), transcript variant X4, mRNA	5.24	14.31	8.07	5.55	8.36	7.86	6.9	3.89	5.99	12.53	5.76	11.7	7.34	12.07	8.03	5.9	8	1.38	0.89	13.05
XM_028854848.2	Slc6a6	solute carrier family 6 member 6 (Slc6a6), transcript variant X2, mRNA	10.15	21.18	12.3	9.66	17.08	14.87	12.64	8.71	11.09	22.01	11.19	12.99	8.57	20.71	13.04	5.31	8.93	1.55	1	31
XM_028854849.2	LOC114681372	F-box-like/WD repeat-containing protein TBL1X (LOC114681372), transcript variant X1, mRNA	0	0	0	0	0	0	0	0	0	0	0	0	0	0	0	0	0	0	0	0
XM_028854850.2	LOC114681372	F-box-like/WD repeat-containing protein TBL1X (LOC114681372), transcript variant X3, mRNA	0.51	0.87	0.41	0.19	1.05	0.87	0.44	0.39	0.68	2.06	0	0.27	0	0	0.12	0.16	0.23	0	0	0.14
XM_028854851.2	LOC114681372	F-box-like/WD repeat-containing protein TBL1X (LOC114681372), transcript variant X2, mRNA	0	1.03	0.65	0.44	0.25	0.3	0.39	0	0.21	0.53	0.21	0	0	0.2	0	0.23	0.24	0	0.09	0
XM_028854852.2	LOC114681372	F-box-like/WD repeat-containing protein TBL1X (LOC114681372), transcript variant X4, mRNA	0.37	0.5	0	0	0	0	0	0	0	0	0	0	0	0	0	0	0.18	0	0	0
XM_028854853.2	Slc6a6	solute carrier family 6 member 6 (Slc6a6), transcript variant X3, mRNA	6.26	11.86	6.64	6.96	6.49	14.68	9.29	5.45	9.3	20.63	10.09	12.43	5.66	17.28	6.34	6.29	8.1	0	0.92	14.52
XM_028854854.2	LOC114681372	F-box-like/WD repeat-containing protein TBL1X (LOC114681372), transcript variant X7, mRNA	0.43	2.2	0.35	0.34	0.31	0.11	0.57	0	0.44	1.4	0	0.14	0.22	0.72	1.74	0	0.14	0	0	0.26
XM_028854855.2	LOC114681372	F-box-like/WD repeat-containing protein TBL1X (LOC114681372), transcript variant X5, mRNA	0	0	0	0	0	0	0	0	0.21	0.26	0	0	0	0	0.36	0	0	0	0	0
XM_028854856.2	LOC114681372	F-box-like/WD repeat-containing protein TBL1X (LOC114681372), transcript variant X8, mRNA	0.22	0.09	1.07	0	0.73	1.63	0.72	0.08	0.25	0.81	0	0.13	0.31	0.46	0.43	0.13	0.18	0	0	0.21
XM_028854857.2	LOC114681372	F-box-like/WD repeat-containing protein TBL1X (LOC114681372), transcript variant X9, mRNA	0	0.2	0.35	0.2	0.64	0.29	0	0.33	0	0.14	0.43	0	0	0.18	0.2	0	0	0	0	0
XM_028854858.2	LOC114681372	F-box-like/WD repeat-containing protein TBL1X (LOC114681372), transcript variant X10, mRNA	0.5	0.63	0	0.18	0	0	0.48	0.31	0.14	0	0	0	0	0	0.49	0.2	0	0	0	0.76
XM_028854859.2	LOC114681372	F-box-like/WD repeat-containing protein TBL1X (LOC114681372), transcript variant X12, mRNA	2.87	6.92	3.37	2.51	3.93	1.89	3.21	2.46	3.81	6.87	1.4	1.5	0.76	2.05	5.76	0.74	1.92	0	0.16	1.47
XM_028854860.2	LOC114681372	F-box-like/WD repeat-containing protein TBL1X (LOC114681372), transcript variant X13, mRNA	0.12	0	0	0.11	0.12	0.52	0.38	0.13	0	0.52	0	0	0	0.15	0.08	0	0.1	0	0	0.08
XM_028854861.1	LOC114681372	F-box-like/WD repeat-containing protein TBL1X (LOC114681372), transcript variant X14, mRNA	8.58	6.52	3.95	4.25	4.63	4.54	7.09	4.76	6.51	7.4	3.73	0.21	3.06	3.83	7.05	1.76	1.23	1.45	0.82	0.76
XM_028854862.2	LOC114681373	claudin-34-like (LOC114681373), mRNA	0	0	0	0	0	0	0	0	0	0	0	0	0	0	0	0	0	0	0	0
XM_028854863.2	Slc6a6	solute carrier family 6 member 6 (Slc6a6), transcript variant X4, mRNA	0	0	0	0	1.36	2.56	1.26	0.88	0	0	0.74	1.19	2.4	3.88	0	0.31	1.04	0.38	0	1.25
XM_028854864.2	LOC114681376	claudin-34-like (LOC114681376), mRNA	0	0	0	0	0	0	0	0	0	0	0	0	0	0	0	0.03	0	0	0	0
XM_028854865.1	LOC114681377	probasin-like (LOC114681377), mRNA	0	0	0	0	0	0	0	0	0	0	0	0	0	0	0	0	0	0	0	0
XM_028854866.2	LOC114681378	claudin-34-like (LOC114681378), mRNA	0	0	0	0	0	0	0	0	0	0	0	0	0	0	0	0	0	0	0	0
XM_028854867.2	Prkx	protein kinase X-linked (Prkx), transcript variant X1, mRNA	7.92	23.18	10.28	10.94	14.82	11.83	12.47	7.67	12.98	22.4	5.58	3.89	6.25	10.03	6.01	4.37	14.27	1.36	0.73	6.97
XM_028854870.2	Grip2	glutamate receptor interacting protein 2 (Grip2), transcript variant X1, mRNA	0	0	0	0	0	0	0	0	0	0	0	0	0	0	0	0	0	0	0	0
XM_028854871.2	LOC114681385	claudin-34-like (LOC114681385), mRNA	0.05	0.07	0	0.03	0.04	0	0	0	0.05	0.06	0	0	0	0.07	0.12	0	0	0	0	0
XM_028854872.2	Tom1	target of myb1 membrane trafficking protein (Tom1), transcript variant X2, mRNA	11.22	17.39	11.65	11.13	10.65	13.84	17.66	8.56	11.57	24.2	9.53	6.31	5.44	12.59	9.27	7.68	5.7	1.94	0.91	11.24
XM_028854874.2	Hmgxb4	HMG-box containing 4 (Hmgxb4), transcript variant X1, mRNA	1.81	3.64	2.49	1.85	2.17	0.83	1.33	0	0.99	5.19	2.17	1.51	2.47	2.68	2.72	1.18	1.89	0	0.21	3.84
XM_028854876.2	Hmgxb4	HMG-box containing 4 (Hmgxb4), transcript variant X2, mRNA	0.44	2.93	2.77	1.96	2.87	3.57	3.35	1.35	4.16	6.38	1.81	2.55	1.91	3.69	3.06	1.92	3.43	0.85	0	1.79
XM_028854878.2	Hmgxb4	HMG-box containing 4 (Hmgxb4), transcript variant X3, mRNA	3.86	3.67	1.72	2.45	1.5	2.89	3.2	3.55	1.4	0.04	1.62	1.8	0.26	3.56	2.39	1.79	0.54	0.17	0.47	2.14
XM_028854879.2	Isx	intestine specific homeobox (Isx), mRNA	0	0	0	0	0	0	0	0	0	0	0	0	0	0	0	0	0	0	0	0
XM_028854882.2	LOC114681394	glycine cleavage system H protein, mitochondrial (LOC114681394), mRNA	0	0	0	0	0.03	0	0.04	0.13	0	0.06	0	0.02	0.05	0	0	0	0	0	0	0.13
XM_028854883.2	Hopx	HOP homeobox (Hopx), transcript variant X1, mRNA	60.96	84.48	45.12	88.55	60.91	127.22	79.15	86.35	64.65	104.31	42.92	19.41	9.44	67.47	14.02	11.62	23.37	8.08	2.1	24.17
XM_028854885.2	Mcm5	minichromosome maintenance complex component 5 (Mcm5), mRNA	7.23	9.99	8.2	7.03	7.67	7.15	11.12	5.01	7.15	12.18	5.46	3.78	3.68	8.11	15.39	9.56	6.18	3.57	1.71	8.13
XM_028854886.2	Rasd2	RASD family member 2 (Rasd2), mRNA	0.28	0.65	0.36	0.27	0.17	0.31	0.18	0.11	0.22	0.75	0.69	0.37	0.53	1	0.67	0.23	0.22	0.06	0.02	0.48
XM_028854887.2	Hmox1	heme oxygenase 1 (Hmox1), mRNA	10.26	15.15	10.73	13.48	16.74	22.23	14.73	11.47	13.82	20.49	25.29	117.2	41.62	90.85	73.63	85.3	115.76	14.42	4.16	136.59
XM_028854888.2	Grip2	glutamate receptor interacting protein 2 (Grip2), transcript variant X5, mRNA	0	0.01	0	0	0.06	0.03	0	0.02	0	0.03	0	0	0	0	0	0	0	0	0	0
XM_028854889.2	Gng8	G protein subunit gamma 8 (Gng8), transcript variant X1, mRNA	0	0	0	0	0	0	0.06	0	0	0	0	0	0	0	0	0	0	0	0	0
XM_028854890.2	Strn4	striatin 4 (Strn4), transcript variant X1, mRNA	5.94	2.51	3.44	4.16	3.12	4.42	7.08	3.83	5.21	7.02	3.31	4.97	4.22	10.05	7.63	4.81	7.44	1.48	1.18	5.81
XM_028854891.2	Strn4	striatin 4 (Strn4), transcript variant X2, mRNA	6.54	10.42	5.4	4.53	6.89	7.45	9.12	5.36	5.45	13.04	5.87	5.14	3.77	7.3	6.62	7.7	6.47	1.18	0.49	7.86
XM_028854892.2	Strn4	striatin 4 (Strn4), transcript variant X3, mRNA	0	2.72	0.26	0	0	0.31	0	0	0	0	0	0	0	0	0	0	0	0	0	0
XM_028854894.2	LOC114681405	fukutin related protein (LOC114681405), transcript variant X1, mRNA	2.54	2.63	1.75	1.8	1.99	2.18	2.16	1.99	0.03	3.87	0.73	1.67	1.39	2.05	2.27	2.92	3.7	0.91	0.18	3.44
XM_028854895.2	LOC114681405	fukutin related protein (LOC114681405), transcript variant X3, mRNA	0.08	0.56	0.44	0.39	0.08	0	0.54	0.15	0.39	0.11	0.87	0.35	0.16	0.37	0.69	0	0.2	0	0.08	0.22
XM_028854896.2	LOC114681405	fukutin related protein (LOC114681405), transcript variant X2, mRNA	0	0	0	0	0	0	0	0	1.98	0	0	0	0	0	0	0	0.58	0	0	0.31
XM_028854897.2	Grip2	glutamate receptor interacting protein 2 (Grip2), transcript variant X7, mRNA	0	0	0.02	0.02	0	0	0	0	0	0	0	0	0.02	0	0	0.00965	0	0	0	0
XM_028854899.2	LOC114681406	paraneoplastic antigen-like protein 8C (LOC114681406), mRNA	0	0	0	0	0	0	0	0	0	0	0	0	0	0	0	0	0	0	0	0
XM_028854901.1	LOC114681409	homeobox protein SEBOX-like (LOC114681409), mRNA	0	0	0	0.27	0	0	0	0	0	0.12	0	0	0	0.07	0	0	0	0	0	0
XM_028854902.2	Sae1	SUMO1 activating enzyme subunit 1 (Sae1), mRNA	35.61	43.94	25.53	22.14	28.83	30.55	40.83	21.97	28.5	42.33	22.15	16.57	11.94	28.63	36.5	25.53	28.75	7.42	3.46	15.74
XM_028854903.2	Crx	cone-rod homeobox (Crx), mRNA	0.05	0	0	0	0	0	0	0	0	0	0.03	0	0	0.03	0.04	0	0	0	0	0
XM_028854904.2	Zc3h4	zinc finger CCCH-type containing 4 (Zc3h4), transcript variant X2, mRNA	5.62	3.87	2.93	4.17	3.65	6.06	6.22	3.8	3.32	7.06	5.29	4.67	4.62	7.37	5.61	2.94	2.26	1.94	1.02	7.26
XM_028854906.2	Zc3h4	zinc finger CCCH-type containing 4 (Zc3h4), transcript variant X5, mRNA	0.19	0.06	0.06	0.07	0.13	0.05	0	0.06	0	0.08	0.25	0.15	0.23	0.22	0	0.05	0	0.16	0	0.17
XM_028854907.2	Zc3h4	zinc finger CCCH-type containing 4 (Zc3h4), transcript variant X6, mRNA	0.86	3.14	1.19	0.8	1.42	2.44	1.88	0.62	2.03	4.16	0.71	1.71	0.25	2.19	1.41	0.43	0.99	0.1	0	3.58
XM_028854908.2	Ccdc174	coiled-coil domain containing 174 (Ccdc174), mRNA	8.37	9.02	5.88	6.36	5.22	7.19	7.18	5.37	6.77	10.54	7.35	5.89	3.74	9.04	7.37	3.29	8.77	1.89	0.81	6.73
XM_028854909.2	Zc3h4	zinc finger CCCH-type containing 4 (Zc3h4), transcript variant X7, mRNA	4.74	9.22	4.59	3.58	4.2	4	7.74	3.94	5.61	8.99	3.6	6.56	4.09	8.96	5.94	3.15	4.31	0.87	0.68	9.63
XM_028854910.2	Bicra	BRD4 interacting chromatin remodeling complex associated protein (Bicra), mRNA	6.58	9.63	5.11	5.14	5.44	7.26	9.62	5.3	7.9	14.59	5.35	3.42	4.33	8.83	5.03	2.19	2.54	1.07	0.53	7.7
XM_028854911.2	Kptn	kaptin, actin binding protein (Kptn), mRNA	4.54	8.03	5.75	5.9	5.06	5.28	5.77	5.65	5.55	10.83	3.39	7.21	2.76	4.87	4.89	2.86	5.54	3.22	1.05	6.24
XM_028854912.2	Napa	NSF attachment protein alpha (Napa), transcript variant X1, mRNA	98.56	199.5	139.46	167.19	149.82	196.61	130.54	92.87	194.48	202.29	217.59	127.66	164.63	134.61	209.38	102.21	91.59	113.38	113.76	99.35
XM_028854913.1	Calm3	calmodulin 3 (Calm3), mRNA	57.26	66.57	65.46	46.81	57.58	63.12	57.99	47.42	44.19	73.9	68.23	65.42	56.4	69.35	60.16	41.96	48.6	43	21.27	87.94
XM_028854914.2	Slc8a2	solute carrier family 8 member A2 (Slc8a2), mRNA	0.03	0.06	0.25	0.01	0.27	0.16	0.07	0.15	0.05	0.09	0.04	0	0	0	0	0	0	0	0	0
XM_028854915.2	Pnma8b	PNMA family member 8B (Pnma8b), mRNA	0	0.06	0.52	0	0.36	0.05	0.06	0.12	0.02	0.05	0	0	0	0	0	0.01	0.01	0	0	0
XM_028854916.2	Pnma8a	paraneoplastic antigen-like protein 8A (LOC114681422), mRNA	0.06	0.04	0.37	0.03	0.11	0.16	0.04	0	0.08	0.09	0.01	0	0.12	0.03	0.09	0	0.03	0	0.05	0.02
XM_028854917.2	LOC114681424	serine/threonine-protein phosphatase 5 (LOC114681424), mRNA	13.56	15.96	8.41	10.65	11.53	14.49	16.48	10.48	13.13	21.54	8.95	5.63	4.15	12.24	13.37	7.65	11.34	2.28	1.71	10.16
XM_028854918.2	LOC114681425	carcinoembryonic antigen-related cell adhesion molecule 15-like (LOC114681425), mRNA	1.01	1.53	1.16	1.06	0.88	1.02	1.29	0.65	0.63	2.05	0.17	0.59	0.75	2.25	1.73	0.14	0.67	0.45	0	0.68
XM_028854919.2	LOC114681426	carcinoembryonic antigen-related cell adhesion molecule 3-like (LOC114681426), mRNA	0	0	0	0	0	0	0	0	0	0	0	0	0	0	0	0	0	0	0	0
XM_028854920.2	Ehd2	EH domain containing 2 (Ehd2), mRNA	0.16	1.1	0.33	0.78	2.72	0.85	1.26	0.38	0.56	1.18	0.7	0.34	0.24	0.21	0.82	0.58	0.47	0.12	0.05	0.49
XM_028854921.2	Ptgir	prostaglandin I2 receptor (Ptgir), mRNA	4.26	9.36	3.78	6.29	6.27	14.84	10.5	5.83	6.84	12.2	13.59	16.12	6.21	14.71	9.99	34.52	41.78	2.69	1.14	18.66
XM_028854922.2	Arhgap35	Rho GTPase activating protein 35 (Arhgap35), mRNA	1.14	2.68	1.38	1.3	1.4	0.92	1.68	0.83	1.34	2.79	0.93	0.72	0.85	1.11	1.56	4.32	5.86	0.35	0.16	0.53
XM_028854923.2	Dhx34	DExH-box helicase 34 (Dhx34), transcript variant X1, mRNA	1.45	3.49	1.72	1.82	0.8	2.79	1.17	0.98	1.86	3.89	2.42	4.49	2.23	6.69	2.91	0.41	0.92	0.02	0.6	2.38
XM_028854924.2	Dact3	dishevelled binding antagonist of beta catenin 3 (Dact3), mRNA	0.03	0.02	0.17	0.02	0.13	0.07	0.05	0.03	0.03	0.1	0.02	0	0	0	0.05	0.02	0.04	0	0.01	0
XM_028854925.2	Prkd2	protein kinase D2 (Prkd2), transcript variant X1, mRNA	20.29	30.16	16.63	15.18	16.48	17.96	23.87	15.64	18.2	31.32	12.51	17.45	10.36	21.98	19.98	4.59	6.12	5.34	2.08	22.8
XM_028854926.2	Prkd2	protein kinase D2 (Prkd2), transcript variant X2, mRNA	3.52	4.83	2.11	0.97	0.8	4.1	4.53	0	2.78	4.27	2.51	0.72	1.22	3.77	2.94	0	0	0	0	3.03
XM_028854927.2	C3H3orf20	chromosome 3 C3orf20 homolog (C3H3orf20), transcript variant X3, mRNA	0.37	0.9	0.53	0.67	0.73	0.41	1.12	0.21	0.79	1.12	0.52	0.22	0.49	0.37	1	0.2	0	0.08	0.07	0.52
XM_028854928.2	Ccdc9	coiled-coil domain containing 9 (Ccdc9), transcript variant X1, mRNA	0	0	0	0	0	0	0	0	0	0	0	0	0	0	0	0	0	0	0	0
XM_028854929.2	Ccdc9	coiled-coil domain containing 9 (Ccdc9), transcript variant X3, mRNA	0.09	0.09	0.18	0.07	0.03	0.5	0.2	0	0.34	0.28	0.16	0.2	0	0.29	0.18	0.12	0.16	0	0.1	0.29
XM_028854930.2	Ccdc9	coiled-coil domain containing 9 (Ccdc9), transcript variant X4, mRNA	4.71	5.84	3.33	2.14	1.92	4.74	5.32	2.81	5.07	8.56	5.48	3.84	1.85	6.33	2.85	3.91	5.58	0.59	0.85	7.28
XM_028854932.2	Ccdc9	coiled-coil domain containing 9 (Ccdc9), transcript variant X5, mRNA	0	0	0	0	0	0	0	0	0	0	0	0	0	0	0	0	0	0	0	0
XM_028854933.2	Ccdc9	coiled-coil domain containing 9 (Ccdc9), transcript variant X6, mRNA	4.22	5.4	2.45	2.43	2.74	4.86	5.28	3.31	4.35	5.91	2.31	2.25	2.3	4.75	4.74	3.29	3.19	0.86	0.45	3.78
XM_028854934.2	Ccdc9	coiled-coil domain containing 9 (Ccdc9), transcript variant X8, mRNA	0	0	0	0	0	0	0	0	0	0	0	0	0	0	0	0	0	0	0	0
XM_028854936.2	Nop53	NOP53 ribosome biogenesis factor (Nop53), mRNA	201.52	254.4	123.01	139.16	143.44	177.67	232.89	155.88	152.99	281	94.56	61.09	49.73	111	72.74	59.58	92.46	51.96	14.63	95.07
XM_028854937.2	Ap2s1	adaptor related protein complex 2 subunit sigma 1 (Ap2s1), mRNA	45.35	61.77	64.04	68.75	58.64	91.39	58.14	53.82	68.5	99.45	92.41	171.88	69.66	116.49	76.5	69.07	99.62	80.68	28.53	129.09
XM_028854938.2	C5ar1	complement C5a receptor 1 (C5ar1), mRNA	29.15	22.68	12.91	21.3	25.75	63.49	37.06	47.16	27.28	37.85	229.88	189	140.59	434.05	138.47	89.08	92.31	21.6	11.77	330.71
XM_028854939.2	Meis3	Meis homeobox 3 (Meis3), transcript variant X3, mRNA	0.79	2.98	0.63	0.55	2.56	0.38	1.73	1.49	1.95	2.43	0.33	0.62	0	0.93	1.6	4.53	2.65	0	0	0.13
XM_028854940.2	Fgd5	FYVE, RhoGEF and PH domain containing 5 (Fgd5), mRNA	0.04	0.11	0.16	0.04	0.41	0.22	0.11	0.06	0.07	0.21	0.02	0	0.00995	0.04	0.01	0.03	0.00934	0	0.00903	0.04
XM_028854941.2	Selenow	selenoprotein W (Selenow), mRNA	100.87	184.01	125.34	96.41	108.75	95.15	150.35	127.57	116.46	237.21	77.02	34.34	38.21	61.42	47.45	33.28	56.16	31.81	6.46	19.67
XM_028854942.2	Npas1	neuronal PAS domain protein 1 (Npas1), mRNA	0.21	0.23	0.12	0.08	0.03	0.1	0.03	0.1	0.13	0.29	0.06	0.02	0.06	0.08	0.03	0.06	0.18	0.19	0.1	0.1
XM_028854943.1	Tmem160	transmembrane protein 160 (Tmem160), mRNA	56.78	65.46	87.33	89.57	60.84	61.21	49.41	67.36	56.05	76.22	80.36	87.57	77.25	45.66	41.81	54.03	54.71	131.63	63.23	34.97
XM_028854944.2	Slc1a5	solute carrier family 1 member 5 (Slc1a5), mRNA	8	19.94	6.77	13.1	8.8	8.2	9.13	8.95	8.45	22.27	8.22	5.64	2.64	14.54	9.82	11.03	17.72	2.65	0.81	6.62
XM_028854945.2	Hif3a	hypoxia inducible factor 3 subunit alpha (Hif3a), transcript variant X1, mRNA	0.3	0.63	0.53	0.39	0.37	0.58	0.16	0.25	0.73	0.57	0.63	0.63	0.42	1.13	0.72	0.28	0.33	0.24	0.14	0.28
XM_028854946.2	Hif3a	hypoxia inducible factor 3 subunit alpha (Hif3a), transcript variant X2, mRNA	0.39	0	0	0	0	0.18	0.21	0	0	0.11	0	0	0	0.12	0	0	0	0	0	0
XM_028854947.2	Bbc3	BCL2 binding component 3 (Bbc3), transcript variant X1, mRNA	3.51	4.41	2.69	1.94	2.73	6.1	4.58	3.22	2.9	5.18	2.5	2.74	1.04	1.48	0.91	0.89	2.32	1.25	0	2.23
XM_028854948.2	Bbc3	BCL2 binding component 3 (Bbc3), transcript variant X2, mRNA	3.66	4.55	2.89	4.22	4.02	2.63	5.38	4.59	4.59	5.32	8.89	22.94	10.48	16.38	8.81	6.13	7.69	4.71	1.17	30.12
XM_028854952.2	Inafm1	InaF motif containing 1 (Inafm1), mRNA	2.46	2.43	1.19	1.85	1.35	2.42	3.3	1.43	1.99	3.59	2.12	1.12	1.01	2.79	2.13	1.59	2.83	0.85	0.1	2.46
XM_028854953.2	Rbsn	rabenosyn, RAB effector (Rbsn), transcript variant X1, mRNA	1.66	5.12	2.81	2.66	3.41	2.6	2.61	3.91	3.84	3.06	8.72	5.08	3.19	13.44	4.04	1.95	4.58	0	0.52	5.77
XM_028854956.2	Ccdc8	coiled-coil domain containing 8 (Ccdc8), mRNA	1.38	2.33	1.04	1.42	1.33	1.17	1.49	1.04	1.64	2.58	1.49	1.18	1.04	2.31	2.37	0.52	0.79	0.3	0.24	1.08
XM_028854957.2	C5ar2	complement component 5a receptor 2 (C5ar2), mRNA	3.11	2.35	1.7	2.53	2.29	7.91	3.11	4.66	1.92	4.43	20.55	25.63	21.52	49.94	17.34	4.01	5.14	1.49	1.14	36.37
XM_028854958.2	Hopx	HOP homeobox (Hopx), transcript variant X2, mRNA	1.54	0.5	2.63	0.66	1.96	1.4	1.46	3.05	2.15	4.48	1.33	0.45	0.23	0.21	0.19	1.12	2.2	1.09	0	0
XM_028854959.2	Rbsn	rabenosyn, RAB effector (Rbsn), transcript variant X2, mRNA	3	0.04	0.25	0.32	0.11	2.54	2.48	0	0	3.46	2.57	1	0.74	0.46	1.47	1.92	0.01	0.71	0	0.49
XM_028854960.2	Cdh19	cadherin 19 (Cdh19), transcript variant X1, mRNA	0	0	0	0	0	0	0	0	0	0	0	0	0	0	0	0	0	0	0	0
XM_028854961.2	Cdh19	cadherin 19 (Cdh19), transcript variant X2, mRNA	0	0	0	0	0	0	0	0	0	0	0	0	0	0	0	0	0	0	0	0
XM_028854962.1	LOC114681457	cadherin-7-like (LOC114681457), mRNA	0	0	0.04	0.03	0	0	0	0	0	0.02	0	0.02	0	0.04	0.02	0	0	0	0	0
XM_028854964.2	Tspan14	tetraspanin 14 (Tspan14), transcript variant X1, mRNA	22.46	38.33	19.6	4.97	21.82	42.37	34.43	21.67	28.06	49.17	40.07	94.15	38.87	90.78	46.05	49.12	36.58	2.18	5.43	87.29
XM_028854966.1	Nr2c2	nuclear receptor subfamily 2 group C member 2 (Nr2c2), transcript variant X1, mRNA	11.84	15.83	8.9	9.14	12.43	10.81	9.82	6.91	9.24	15.07	5.91	5.69	5.83	13.59	10.29	1.48	4.51	1.13	0.08	7.61
XM_028854967.2	Prxl2a	peroxiredoxin like 2A (Prxl2a), transcript variant X2, mRNA	30.73	18.53	21.49	6.36	8.53	47.63	19.77	18.3	47.17	37.02	11.35	18.12	32.55	19.91	24.33	26.02	18.56	17	36.63	17.79
XM_028854968.2	Prxl2a	peroxiredoxin like 2A (Prxl2a), transcript variant X4, mRNA	40.62	18.87	26.6	4.92	6.62	58.37	26.39	25.29	54.14	44.33	14.26	21.2	35.32	19.31	20.83	27.05	20.14	18.24	31.98	27.76
XM_028854969.2	Dydc1	DPY30 domain containing 1 (Dydc1), transcript variant X1, mRNA	0	0	0	0	0	0	0	0	0	0	0	0	0	0	0	0	0	0	0	0
XM_028854970.2	Dydc1	DPY30 domain containing 1 (Dydc1), transcript variant X3, mRNA	0	0	0	0	0	0	0	0	0	0	0	0	0	0	0	0	0	0	0	0
XM_028854971.2	Dydc2	DPY30 domain containing 2 (Dydc2), transcript variant X2, mRNA	0	0	0	0	0	0	0	0	0	0	0	0	0	0	0	0	0	0	0	0
XM_028854974.2	Dydc2	DPY30 domain containing 2 (Dydc2), transcript variant X3, mRNA	0	0	0	0	0	0	0	0	0	0	0	0	0	0	0	0	0	0	0	0
XM_028854975.2	Mat1a	methionine adenosyltransferase 1A (Mat1a), transcript variant X2, mRNA	0	0	0.02	0	0.04	0	0	0	0	0.04	0.07	0.09	0.04	0	0.02	0	0	0.48	0	0
XM_028854976.2	Nr2c2	nuclear receptor subfamily 2 group C member 2 (Nr2c2), transcript variant X2, mRNA	0	0	0.11	0.06	0	0	0	0.07	0.13	0	0	0	0	0.11	0	0	0	0	0	0.17
XM_028854977.2	Mbl1	mannose-binding protein A-like (LOC114681468), transcript variant X1, mRNA	0	0	0	0	0	0	0	0	0	0	0	0	0	0	0	0	0	0	0	0
XM_028854978.2	Sh2d4b	SH2 domain containing 4B (Sh2d4b), transcript variant X2, mRNA	0	0.16	0	0	0	0.14	0.02	0.1	0	0.22	0	0.21	0	0.11	0.11	0	0	0	0	0.08
XM_028854979.2	Sh2d4b	SH2 domain containing 4B (Sh2d4b), transcript variant X3, mRNA	0.05	0	0.09	0	0	0	0.13	0	0.12	0.11	0.09	0	0.13	0.07	0.07	0.22	0.08	0.03	0	0.12
XM_028854980.2	LOC114681470	pulmonary surfactant-associated protein A (LOC114681470), mRNA	0	0	0	0.03	0	0.86	0	0	0	0	0	0	0.03	0	0	0.13	0.13	0.04	0	0
XM_028854981.2	Sftpd	surfactant protein D (Sftpd), transcript variant X1, mRNA	0	0	0.04	0.56	0.27	0.3	0	0.18	0.47	0	0	0	0.18	0.12	0	4.65	5.65	0.1	0	0.04
XM_028854982.2	Nr2c2	nuclear receptor subfamily 2 group C member 2 (Nr2c2), transcript variant X3, mRNA	0.17	2.42	0.6	0.17	0.22	1.64	1	0.17	0.7	1.63	0.45	0.07	0.44	1.09	0.89	0.44	0	0.11	0.54	0.99
XM_028854984.2	LOC114681477	probable asparagine--tRNA ligase, mitochondrial (LOC114681477), mRNA	0.87	0.65	0.27	0.23	0.31	0.6	1.04	0.21	1.08	1.76	0.59	0.59	0.17	0.45	0.41	0.21	0.26	0.06	0.1	0.33
XM_028854986.2	Nr2c2	nuclear receptor subfamily 2 group C member 2 (Nr2c2), transcript variant X4, mRNA	0	0.17	0	0	0.14	0.06	0.23	0	0	0.08	0	0.09	0.17	0.2	0.1	0	0.06	0	0	0
XM_028854987.2	Cnot6	CCR4-NOT transcription complex subunit 6 (Cnot6), transcript variant X1, mRNA	1.59	5.36	2.91	2.39	0.01	3.81	2.42	0.77	3.73	2.85	2	2.31	0.61	4.12	2.45	1.2	1.42	0.88	0.17	2.47
XM_028854988.2	Cnot6	CCR4-NOT transcription complex subunit 6 (Cnot6), transcript variant X2, mRNA	8.58	12.01	7.12	5.89	9.83	5.51	8.24	4.14	6.45	10.17	5.8	5.89	5.63	8.46	10.98	6.5	7.48	1.1	1.16	14.14
XM_028854992.2	Hnrnph1	heterogeneous nuclear ribonucleoprotein H1 (Hnrnph1), transcript variant X3, mRNA	76.19	101.96	57.06	51.94	55.48	54.28	78.84	42.67	53.9	96.11	41.87	26.23	35.25	83.85	81.23	40.57	50.8	11.52	5.97	49.98
XM_028854994.2	Nr2c2	nuclear receptor subfamily 2 group C member 2 (Nr2c2), transcript variant X5, mRNA	0.29	0	0.06	0.05	0.17	0.1	0.49	0.19	0.1	0	0.43	0	0.11	0	0	0	0	0	0	0
XM_028854995.2	Hnrnph1	heterogeneous nuclear ribonucleoprotein H1 (Hnrnph1), transcript variant X1, mRNA	6.2	3.55	4.83	5.18	6.35	3.78	6.86	4.74	5.77	9.84	3.84	4.66	1.81	10.69	9.66	9.16	11.94	0.91	0.73	6.34
XM_028854996.2	Tbc1d9b	TBC1 domain family member 9B (Tbc1d9b), transcript variant X1, mRNA	1.11	0.97	0.9	0.76	0.28	0.65	0.7	0.31	1.01	1.77	1.35	4.1	1.02	5.29	2.31	5.77	3.33	0	0.38	6.57
XM_028854997.2	Tbc1d9b	TBC1 domain family member 9B (Tbc1d9b), transcript variant X2, mRNA	4.67	7.82	3.32	5.04	5.26	5.9	7.37	4.65	5.02	10.59	10.63	16.59	12.55	34.52	15.71	27.99	12.77	2.7	0.65	33.29
XM_028854998.2	Sqstm1	sequestosome 1 (Sqstm1), mRNA	42.05	49.54	29.49	31.73	30.43	47.63	52.89	49.06	33.13	70.05	53.13	45.94	36.31	89.18	45.22	70.85	27.71	15.21	8.54	45.9
XM_028854999.2	LOC114681487	MRN complex interacting protein (LOC114681487), mRNA	6.76	10.94	5.65	7.27	7.46	9.08	8.79	5.21	7.14	13.63	4.99	5.75	3.81	6.81	8.79	3.61	4.37	2.67	1.74	6.11
XM_028855000.2	Rufy1	RUN and FYVE domain containing 1 (Rufy1), transcript variant X1, mRNA	0.57	1.89	3.38	0.27	2.75	1.93	2.28	1.46	1.19	4.56	0.91	0.23	1.25	2.18	0.91	2.25	1.96	0.16	0	1.75
XM_028855002.2	Rasgef1c	RasGEF domain family member 1C (Rasgef1c), mRNA	0	0.06	0	0	0.11	0	0	0	0	0.02	0	0.02	0	0	0	0	0	0	0	0
XM_028855003.2	Nr2c2	nuclear receptor subfamily 2 group C member 2 (Nr2c2), transcript variant X6, mRNA	1.04	0.82	0.58	0.35	1.35	0.79	2.01	0	0.84	2.61	0.44	1.22	0.19	0.66	1.01	0.36	0.31	0	0.36	2.13
XM_028855004.2	Mgat4b	alpha-1,3-mannosyl-glycoprotein 4-beta-N-acetylglucosaminyltransferase B (Mgat4b), mRNA	3.65	6.03	2.61	3.02	5.85	3.88	4.49	3.44	3.69	7.59	3.61	3.3	2.73	4.64	4.58	23.66	6.81	1.35	0.3	5.8
XM_028855005.2	Ltc4s	leukotriene C4 synthase (Ltc4s), mRNA	2.46	6.4	0.72	3.37	2.39	5.79	15.77	6.55	7.48	6.01	1.56	8.11	2.24	1.76	0.82	5.52	1.05	3.44	2.96	11.93
XM_028855006.2	Rnf130	ring finger protein 130 (Rnf130), transcript variant X1, mRNA	13.26	15.76	11.4	9.6	14.14	25.16	16.65	13.32	12.18	26.03	18.89	21.83	11.39	35.77	23.92	15.03	14.27	4.49	1.92	37.79
XM_028855007.2	Rnf130	ring finger protein 130 (Rnf130), transcript variant X2, mRNA	0.63	0.18	0.39	0.16	0.55	0.64	0.34	0.28	0.35	0.88	0.54	0.52	0.34	1.16	0.71	0.09	0.22	0.02	0.02	2
XM_028855008.2	Rnf130	ring finger protein 130 (Rnf130), transcript variant X3, mRNA	1.95	1.17	0.91	1.17	1.58	2.46	0.93	2.52	1.34	2.12	1.13	2.48	1.87	3.58	2.52	0.66	1.12	0.77	0.16	5.67
XM_028855009.2	Nr2c2	nuclear receptor subfamily 2 group C member 2 (Nr2c2), transcript variant X7, mRNA	0	0.42	0	0	0.00769	0	0	0	0	0.12	0	0.09	0	0	0	0	0	0	0	0.13
XM_028855010.2	Gfpt2	glutamine-fructose-6-phosphate transaminase 2 (Gfpt2), mRNA	0.01	0.3	0.19	0.18	0.92	0.16	0.24	0.21	0.03	0.6	0.52	0.94	0.37	0.2	5.32	5.05	5.72	1.24	0.06	0.48
XM_028855011.2	Flt4	fms related receptor tyrosine kinase 4 (Flt4), mRNA	0	0.05	0	0.07	0.18	0.11	0	0.04	0.02	0.1	0	0.04	0	0.03	0.01	0.1	0.02	0	0	0.05
XM_028855012.1	LOC114681498	olfactory receptor 10-like (LOC114681498), mRNA	0	0	0	0	0	0	0	0	0	0	0	0	0	0	0	0	0	0	0	0
XM_028855013.1	LOC114681499	olfactory receptor 2Y1-like (LOC114681499), mRNA	0	0	0	0	0	0	0	0	0	0	0	0	0	0	0	0	0	0	0	0
XM_028855014.1	LOC114681500	olfactory receptor 10-like (LOC114681500), mRNA	0	0	0	0	0	0	0	0	0	0	0	0	0	0	0	0	0	0	0	0
XM_028855015.2	LOC114681501	olfactory receptor 10-like (LOC114681501), mRNA	0	0	0	0	0	0	0	0	0	0	0	0	0	0	0	0	0.1	0	0	0
XM_028855016.1	Nr2c2	nuclear receptor subfamily 2 group C member 2 (Nr2c2), transcript variant X8, mRNA	0	1.59	3.08	0	0	0	0.41	0.93	1.42	0.77	0.64	0.45	0.49	0	0.96	2.01	0	0.00905	0	0.73
XM_028855017.2	LOC114681502	olfactory receptor 10-like (LOC114681502), mRNA	0	0	0	0	0	0	0	0	0	0	0.06	0	0.06	0	0	0	0	0	0	0
XM_028855018.1	LOC114681503	olfactory receptor 2Y1-like (LOC114681503), mRNA	0	0	0	0	0	0	0	0	0	0	0	0	0	0	0	0	0	0	0	0
XM_028855020.2	Scgb3a1	secretoglobin family 3A member 1 (Scgb3a1), mRNA	0	0	0	0	0	0	0	0	0	0	0	0	0	0	0	0	0	0.13	0	0
XM_028855022.1	LOC114681508	olfactory receptor 10-like (LOC114681508), mRNA	0	0	0	0	0	0	0	0	0	0	0	0	0	0	0	0	0	0	0	0
XM_028855023.1	LOC114681511	olfactory receptor 10-like (LOC114681511), mRNA	0	0	0	0	0	0	0	0	0	0	0	0	0	0	0	0	0	0	0	0
XM_028855024.1	LOC114681512	olfactory receptor 10-like (LOC114681512), mRNA	0	0	0	0	0	0	0	0	0	0	0	0	0	0	0	0	0	0	0	0
XM_028855025.1	LOC114681513	olfactory receptor 10-like (LOC114681513), mRNA	0	0	0	0	0	0	0	0	0	0	0	0	0	0	0	0	0	0	0	0
XM_028855027.1	LOC114681515	olfactory receptor 2Y1-like (LOC114681515), mRNA	0	0	0	0	0	0	0	0	0	0	0	0	0	0	0	0	0	0	0	0
XM_028855028.2	Maml1	mastermind like transcriptional coactivator 1 (Maml1), mRNA	9.68	16.44	9.89	8.74	10.3	11.8	12.7	7.76	10.7	23	11.53	8.85	9.69	17.27	8.03	5.82	5.46	1.91	0.91	13.14
XM_028855029.2	Canx	calnexin (Canx), transcript variant X1, mRNA	23.89	33.72	28.71	19.21	29.72	33.68	37.39	15.56	30.49	42.2	21.73	19.81	19.72	41.05	29.37	43.76	54.75	2.73	4.22	30.58
XM_028855030.2	Canx	calnexin (Canx), transcript variant X2, mRNA	5.43	17.07	6.54	3.04	11.16	5.16	7.05	2.04	1.7	20.3	6.96	6.19	5.58	9.59	9.84	10.7	15.85	2.45	0.68	6.06
XM_028855031.2	Mapk9	mitogen-activated protein kinase 9 (Mapk9), transcript variant X1, mRNA	3.44	3.88	2.99	2.95	1.88	3.81	4.71	2.52	2.99	5.98	1.1	1.23	0.56	2.82	3.66	1.95	2.31	0.53	0.39	2.24
XM_028855032.2	Mapk9	mitogen-activated protein kinase 9 (Mapk9), transcript variant X3, mRNA	0.48	0.17	0.01	0.32	0.05	0.03	0.8	0.46	0.34	0.4	0.24	0.15	0.14	0.07	0.05	0	0.17	0.06	0	0.01
XM_028855033.2	Mapk9	mitogen-activated protein kinase 9 (Mapk9), transcript variant X2, mRNA	0	0	0.11	0	0.44	0.25	0	0	0	0.11	0.3	0	0	0.2	0	0.22	0	0	0	0
XM_028855034.2	Mapk9	mitogen-activated protein kinase 9 (Mapk9), transcript variant X4, mRNA	0.99	1.62	0.98	0.41	0.46	0.55	0.62	0.28	0.37	0.09	0.76	0.24	0.45	0.24	0.19	0.58	0.56	0.21	0.12	0.27
XM_028855035.2	Mapk9	mitogen-activated protein kinase 9 (Mapk9), transcript variant X5, mRNA	0.1	0.03	0.15	0.01	0.31	0	0.13	0.07	0	1.03	0.15	0.06	0.04	0.17	0.11	0	0.01	0.02	0.06	0
XM_028855036.2	Mapk9	mitogen-activated protein kinase 9 (Mapk9), transcript variant X6, mRNA	1.09	0.94	0.48	0.83	1.83	0.24	1.04	0.73	1.31	1.39	0.67	0.45	0.73	0.2	0	0.76	1.21	0.16	0	0.38
XM_028855037.2	Mapk9	mitogen-activated protein kinase 9 (Mapk9), transcript variant X7, mRNA	0.14	0.38	0.08	0.04	0	0.77	0.14	0	0.08	0	0	0.06	0.07	0.5	0.98	0.1	0.13	0	0	0.18
XM_028855038.2	Akt2	AKT serine/threonine kinase 2 (Akt2), transcript variant X1, mRNA	20.38	38.5	20.55	18.55	23.57	27.73	30.39	23.61	25.69	43.92	36.91	48.08	22.51	65.59	42.56	38.99	50.98	11.35	5.18	45.29
XM_028855039.2	Akt2	AKT serine/threonine kinase 2 (Akt2), transcript variant X2, mRNA	0	0	0	0	0	0	0	0	0	1.86	0	0	1.95	2.27	0	0	0	0	0	0
XM_028855040.2	Akt2	AKT serine/threonine kinase 2 (Akt2), transcript variant X3, mRNA	3.1	0	0	0	0	0	1.37	0	0	0.93	0	0	1.75	0	0	0	0	0	0	0.41
XM_028855041.2	Akt2	AKT serine/threonine kinase 2 (Akt2), transcript variant X4, mRNA	1.6	0	0	1.32	0	1.6	0	0	0	0	0	0	3.12	1.19	1.01	0	0	0	0	0
XM_028855042.2	Akt2	AKT serine/threonine kinase 2 (Akt2), transcript variant X5, mRNA	0	0	0.82	0	0	0	1.95	0	0	0.94	0	0	0	2.55	1.29	0	0	0	0	0
XM_028855043.2	Akt2	AKT serine/threonine kinase 2 (Akt2), transcript variant X7, mRNA	0.55	0.57	0.33	0.5	0	0	0.27	0.65	1.34	0.44	0.46	0.75	0.3	0.35	0	0.43	0	0	0	0.77
XM_028855044.1	Ltbp4	latent transforming growth factor beta binding protein 4 (Ltbp4), transcript variant X1, mRNA	0	0	0	0	0	0	0	0	0	0	0	0	0	0	0	0	0	0	0	0
XM_028855045.2	Ltbp4	latent transforming growth factor beta binding protein 4 (Ltbp4), transcript variant X3, mRNA	0.37	1.59	0.62	0.65	6.35	1.16	2.44	1.27	0.47	1.87	1.15	0.25	0.28	0.31	1.79	3.09	1.98	0	0.11	0.46
XM_028855046.2	Rab4b	RAB4B, member RAS oncogene family (Rab4b), mRNA	30.7	38.16	25.7	24.95	23.39	38	35.31	27.39	32.72	55.18	30.28	47.76	25.26	44.88	32.06	29.91	39.15	12.17	3.27	55.84
XM_028855047.2	Mrps25	mitochondrial ribosomal protein S25 (Mrps25), transcript variant X3, mRNA	10.39	10.05	6.9	5.54	8.07	9.54	16.71	4.45	6.96	9.42	7.3	4.86	3.1	7.78	10.79	12.05	13.04	2.16	1.63	8.3
XM_028855048.2	C1H19orf54	chromosome 1 C19orf54 homolog (C1H19orf54), transcript variant X1, mRNA	3.08	3.7	1.79	1.93	2.59	2.87	3.42	1.64	0	4.41	0.88	1.29	1.14	2.7	2.79	2.44	2.7	0	0.43	2.75
XM_028855049.2	C1H19orf54	chromosome 1 C19orf54 homolog (C1H19orf54), transcript variant X2, mRNA	0	0.5	0.31	0	0	0	0	0	3.51	0	0.47	0	0	0	0	0	0.8	0.56	0	0.18
XM_028855050.2	Snrpa	small nuclear ribonucleoprotein polypeptide A (Snrpa), transcript variant X1, mRNA	5.44	6.35	5.39	4.1	4.91	8.51	11.53	5.12	4.55	13.17	4.24	2.38	3.24	8.66	10.9	16.11	17.4	2.68	0.83	9.31
XM_028855051.2	Snrpa	small nuclear ribonucleoprotein polypeptide A (Snrpa), transcript variant X2, mRNA	2.1	2.42	1.65	2.05	0.29	0	1.1	1	2.1	1.6	0.81	1.21	0.77	2.8	3.33	3.18	2.53	0.41	0	2.24
XM_028855052.2	Mia	MIA SH3 domain containing (Mia), transcript variant X2, mRNA	0.31	0	0.38	0.3	0.68	0	0.11	0	0	0.16	0.5	0	0	0.22	0	0	0	0	0	0
XM_028855053.2	LOC114681531	cytochrome P450 2F3-like (LOC114681531), mRNA	0.11	0.09	0.06	0.23	0.37	0.16	0.07	0.32	0.14	0.61	0.21	0.48	0.11	0.49	0.56	0.27	0.44	0.04	0.02	0.55
XM_028855054.2	Egln2	egl-9 family hypoxia inducible factor 2 (Egln2), transcript variant X1, mRNA	21.04	26.88	13.28	13.76	14.71	21.26	22.31	19.27	16.82	34.03	17.83	28.37	17.85	32.66	21.95	20.14	29.2	8.12	3.36	36.26
XM_028855055.2	Egln2	egl-9 family hypoxia inducible factor 2 (Egln2), transcript variant X3, mRNA	0.8	0.97	1.2	1.06	1.26	2.26	0.48	1.6	1.79	1.49	1.49	3.29	4.09	3.22	3.81	4.29	4.94	0.57	0	16.35
XM_028855056.2	Thegl	theg spermatid protein like (Thegl), transcript variant X1, mRNA	0.37	2.01	0.27	0.49	1.49	0.4	0.94	0	0	0.95	0	0	0.23	0.55	1.45	0	0	0	0	0.28
XM_028855058.2	Egln2	egl-9 family hypoxia inducible factor 2 (Egln2), transcript variant X2, mRNA	0	0.22	0.45	0.16	0.7	1.7	0.24	0	0.47	0.28	0	1.07	1.61	0.62	0.57	3.23	2.24	0.27	0.13	5.7
XM_028855060.2	Egln2	egl-9 family hypoxia inducible factor 2 (Egln2), transcript variant X4, mRNA	2.43	3.48	2.34	3.14	1.79	3.83	5.56	2.74	5.28	6.39	3.94	5.45	1.32	4.08	5.8	9.72	12.48	0.72	0.6	9.8
XM_028855061.1	Pld3	phospholipase D family member 3 (Pld3), transcript variant X2, mRNA	5.27	10.91	7.28	8.56	9.3	12.82	11.48	9.38	10.3	19.03	17.32	20.12	13.96	21.47	12.02	53.93	54.24	5.28	1.75	27.32
XM_028855062.2	Pld3	phospholipase D family member 3 (Pld3), transcript variant X3, mRNA	1.29	0.51	0.43	0.56	0	0	0.93	0	0.8	0.84	1.04	0	0	0.2	0	0.74	0.43	0	0	0.23
XM_028855063.2	Pld3	phospholipase D family member 3 (Pld3), transcript variant X4, mRNA	0.1	1.01	0.58	0.07	0.14	0.55	0.45	0.11	0.72	2.03	0.13	0.11	0.07	0.4	0.12	0.35	0.6	0	0	0
XM_028855064.2	Hipk4	homeodomain interacting protein kinase 4 (Hipk4), mRNA	0	0	0	0.04	0	0	0	0	0	0	0	0.02	0	0.02	0	0.01	0.02	0	0	0
XM_028855065.2	Itpkc	inositol-trisphosphate 3-kinase C (Itpkc), mRNA	1.73	2.97	1.57	1.85	2.02	2.57	2.31	1.6	2.32	3.96	2.45	3.93	1.75	3.88	5.39	13.2	19.7	0.81	0.41	3.64
XM_028855066.2	Coq8b	coenzyme Q8B (Coq8b), transcript variant X1, mRNA	0.44	0.84	0.54	0.71	0.52	0.77	0.4	0.62	0.55	1.06	0.16	0.93	0.32	0.77	0.39	0.68	1.21	0	0	0.58
XM_028855068.2	Coq8b	coenzyme Q8B (Coq8b), transcript variant X5, mRNA	2.87	5.08	3.25	1.4	2.24	3.65	5.8	2.94	1.63	5.64	2.71	2.67	0.86	4.06	4.57	3.88	7.28	0.67	0.81	3.91
XM_028855069.2	Coq8b	coenzyme Q8B (Coq8b), transcript variant X3, mRNA	1.07	0.09	0.31	0	0	0	0	0.42	0	0	0	0	0	0	0	1.14	2.28	0	0	0.47
XM_028855070.2	Coq8b	coenzyme Q8B (Coq8b), transcript variant X2, mRNA	0.99	0.83	0.41	1.24	1.44	0.72	1.25	0.84	2.26	2.74	1.37	0	0.2	0	1.32	2.52	1.32	0.96	0	0.19
XM_028855071.2	Prickle2	prickle planar cell polarity protein 2 (Prickle2), transcript variant X1, mRNA	0	0	0	0	0	0	0	0	0	0	0	0	0	0	0	0	0	0	0	0
XM_028855073.1	Numbl	NUMB like endocytic adaptor protein (Numbl), transcript variant X1, mRNA	0.26	0.79	0.62	0.61	1.2	1.91	0.98	1.21	0.67	1.91	0.78	0.81	0.31	0.26	0.02	2.69	2.2	0.28	0.07	1.56
XM_028855074.2	LOC114681539	cytochrome P450 2B1-like (LOC114681539), mRNA	0	0	0	0	0	0	0	0	0	0	0	0	0	0	0	0	0	0	0	0
XM_028855075.2	LOC114681540	cytochrome P450 2B1-like (LOC114681540), mRNA	0	0.08	0.08	0	0.05	0.04	0.01	0	0.02	0.08	0	0	0.05	0.06	0	0	0	0.03	0	0
XM_028855076.2	LOC114681541	IgGFc-binding protein-like (LOC114681541), mRNA	0.02	0.18	0.26	0.17	0.33	0.06	0.05	0.07	0.02	0.21	0.05	0.02	0.13	0.06	0.33	0.63	0.18	0.03	0.05	0.12
XM_028855077.1	Map3k10	mitogen-activated protein kinase kinase kinase 10 (Map3k10), transcript variant X3, mRNA	3.63	3.48	2.41	2.19	2.46	3.65	5.44	2.77	2.65	4.66	2.23	2.06	1.63	2.84	3.04	2.1	2.46	0.62	0.22	3.05
XM_028855079.2	Prickle2	prickle planar cell polarity protein 2 (Prickle2), transcript variant X2, mRNA	0	0	0.26	0	0.21	0	0	0	0	0.09	0	0	0	0	0	0	0	0	0	0
XM_028855080.2	Zfp60	zinc finger protein 60 (LOC114681543), transcript variant X1, mRNA	0	0	0	0	0.78	0	0.79	0	0.27	0.42	0.14	0	0	0.72	0	0	0	0	0	0
XM_028855081.2	Zfp60	zinc finger protein 60 (LOC114681543), transcript variant X3, mRNA	0	0	0	0	0	0	0	0.37	0	0	0	0	0.09	0.18	0.25	0	0	0	0	0
XM_028855082.2	Zfp60	zinc finger protein 60 (LOC114681543), transcript variant X4, mRNA	0	0	0.2	0.23	0	1.34	0	0	0.03	0	0	0	0	0.32	0	0.17	0	0.14	0.14	0.16
XM_028855083.2	Zfp60	zinc finger protein 60 (LOC114681543), transcript variant X2, mRNA	1.99	2.35	0.9	0.27	1.32	0.55	0.93	1.11	1.61	1.21	0.33	0.44	0.26	1.37	2.8	0.75	1.2	0.18	0	0
XM_028855084.2	Zfp60	zinc finger protein 60 (LOC114681543), transcript variant X5, mRNA	0.59	1.7	0.73	0.71	0.44	0.24	1.25	0	0.83	0.9	0.47	0.49	0	1.24	0.58	0.13	0.25	0	0	0
XM_028855085.2	Zfp60	zinc finger protein 60 (LOC114681543), transcript variant X6, mRNA	1.63	3.02	2.04	0.92	1.61	1.12	0.99	0.48	0.92	2.34	1.18	1.72	1.52	1.36	0.76	0.76	0.94	0.17	0.08	1.96
XM_028855087.2	Zfp60	zinc finger protein 60-like (LOC114681544), transcript variant X1, mRNA	0	0	0	0	0	0	0	0	0	0	0	0	0	0	0	0	0	0	0	0
XM_028855088.2	Zfp60	zinc finger protein 60-like (LOC114681544), transcript variant X2, mRNA	0.06	0.3	0.35	0	0	0.17	0.67	0	0.26	0.41	0	0	0.1	0.06	0.13	0.06	0	0	0	0.04
XM_028855089.2	Prickle2	prickle planar cell polarity protein 2 (Prickle2), transcript variant X3, mRNA	0	0	0	0	0	0	0	0	0	0	0	0	0	0	0	0	0	0	0	0
XM_028855091.2	Zfp60	zinc finger protein 60-like (LOC114681544), transcript variant X5, mRNA	0	0.07	0	0.12	0.22	0.4	0.27	0.07	0	0.42	0	0	0	0	0	0	0	0	0	0.22
XM_028855092.2	Zfp60	zinc finger protein 60-like (LOC114681544), transcript variant X6, mRNA	1.18	3.96	1.56	1.54	2	0.87	2.9	2.03	2.58	3.1	0.29	0.59	1.04	0.97	0.73	0.95	0.69	0.05	0.83	0.67
XM_028855093.2	Zfp60	zinc finger protein 60-like (LOC114681544), transcript variant X7, mRNA	0	0	0	0	0	0	0.04	0	0	0	0	0	0	0	0	0	0	0	0	0
XM_028855094.2	Zfp60	zinc finger protein 60-like (LOC114681545), mRNA	1.78	6.31	3.69	2.25	3.48	2.32	2.48	1.3	2.52	4.83	1.12	1.73	1.64	3.42	5.01	0.83	1.25	0.25	0.39	1.8
XM_028855095.2	Ttc9b	tetratricopeptide repeat domain 9B (Ttc9b), mRNA	0	0.15	0.19	0	0.1	0.05	0	0	0	0.04	0.05	0	0	0	0.05	0	0	0.1	0.02	0
XM_028855096.2	Psmc4	proteasome 26S subunit, ATPase 4 (Psmc4), mRNA	37.28	45.16	34.12	34.5	31.68	37.92	51	32.86	35.86	69.72	31.21	30.37	19.87	46.44	41.52	43.68	56.54	14.33	6.42	37.74
XM_028855097.2	C1H19orf47	chromosome 1 C19orf47 homolog (C1H19orf47), transcript variant X1, mRNA	1.16	1.92	1.83	1.7	1.17	1.96	2.17	0.67	1.49	3.99	1.48	0.64	0.6	1.4	1.85	1.3	2.16	0.15	0.1	1.36
XM_028855098.2	Prickle2	prickle planar cell polarity protein 2 (Prickle2), transcript variant X4, mRNA	0	0.05	0	0	0	0	0	0	0	0	0	0	0.01	0	0	0	0	0	0	0
XM_028855099.1	C1H19orf47	chromosome 1 C19orf47 homolog (C1H19orf47), transcript variant X2, mRNA	0.98	1.57	0.81	1.06	1.2	0.49	1.27	0.5	1.31	0.83	0.39	0.5	0.18	1.23	1.04	1.26	0.42	0.55	0.26	0.35
XM_028855100.2	Prx	periaxin (Prx), transcript variant X1, mRNA	0	0.05	0	0	0	0	0	0	0	0.18	0	0.05	0	0	0	0	0	0	0	0
XM_028855101.2	Scn3a	sodium voltage-gated channel alpha subunit 3 (Scn3a), transcript variant X10, mRNA	0	0	0	0	0	0	0	0	0	0	0	0	0	0	0	0	0	0	0	0
XM_028855102.2	LOC114681552	cytochrome P450 2A5 (LOC114681552), mRNA	0	0	0.1	0.03	0.15	0	0.06	0.1	0	0.03	0.24	0	0	0	0.2	0.07	0	0.12	0	0.03
XM_028855103.2	Blvrb	biliverdin reductase B (Blvrb), transcript variant X1, mRNA	85.15	309.95	398.81	395.96	299.13	291.54	178.92	170.05	234.74	429.09	298.52	257.08	285.95	159.31	384.08	181.41	177.76	313.28	147	64.56
XM_028855104.2	LOC114681554	cytochrome P450 2F2 (LOC114681554), transcript variant X1, mRNA	0	0	0	0	0.64	0	0.89	0	0	0.05	0	0	0	0	0.25	0	0	0	0	0
XM_028855105.2	Sertad3	SERTA domain containing 3 (Sertad3), mRNA	12.42	14.98	11.94	12.71	10.94	13.47	15.68	11.19	12.01	18.41	17.78	15.87	10.12	25.23	13.29	7.09	8.17	6.93	2.57	19.35
XM_028855106.2	Sertad1	SERTA domain containing 1 (Sertad1), mRNA	8.64	11.33	8.94	10.47	12.52	14.66	9.51	8.23	7.41	17.83	23.42	27.56	14.12	30.78	18.04	12.32	11.67	10.24	2.97	25.91
XM_028855107.2	Adamts9	ADAM metallopeptidase with thrombospondin type 1 motif 9 (Adamts9), mRNA	0.64	1	0.76	0.63	0.83	0.73	0.85	0.59	0.72	1.22	0.68	1.03	0.81	2	1.53	0.57	0.69	0.22	0.22	1.39
XM_028855108.2	Cyp2a22	cytochrome P450 2A9-like (LOC114681560), transcript variant X1, mRNA	0	0	0	0	0	0	0	0	0	0	0	0	0	0	0	0	0	0	0	0
XM_028855109.2	Cyp2a22	cytochrome P450 2A9-like (LOC114681560), transcript variant X2, mRNA	0	0	0	0	0	0	0.06	0	0	0	0	0.06	0	0	0	0	0	0	0	0
XM_028855110.2	LOC114681561	cytochrome P450 2G1 (LOC114681561), mRNA	0	0	0.02	0	0	0	0	0	0	0	0	0	0	0	0	0	0	0	0	0
XM_028855111.2	LOC114681562	cytochrome P450 2A9 (LOC114681562), mRNA	0	0	0	0	0.07	0	0	0	0	0	0	0.12	0	0	0	0.14	0	0.15	0	0
XM_028855112.2	LOC114681563	cytochrome P450 2A8 (LOC114681563), mRNA	0	0	0	0	0	0	0	0	0	0.05	0	0	0	0.03	0	0	0	0	0	0
XM_028855113.1	Sptbn4	spectrin beta, non-erythrocytic 4 (Sptbn4), transcript variant X1, mRNA	0.04	0.08	0.15	0.1	0.06	0.09	0	0.04	0.03	0.07	0.01	0.0087	0.03	0.02	0.03	0.04	0.01	0	0.00644	0
XM_028855114.2	Sptbn4	spectrin beta, non-erythrocytic 4 (Sptbn4), transcript variant X2, mRNA	0	0	0	0.02	0	0	0.01	0	0	0	0.01	0	0	0	0	0	0	0	0	0
XM_028855115.2	Shkbp1	SH3KBP1 binding protein 1 (Shkbp1), transcript variant X1, mRNA	15.24	17.6	13.12	13.28	12.97	20.23	22.4	12.87	19.21	30.32	18.69	18.61	14.21	26.96	15.76	12.89	13.04	4.58	1.25	23.42
XM_028855116.2	Shkbp1	SH3KBP1 binding protein 1 (Shkbp1), transcript variant X2, mRNA	5.84	7.47	3.08	3.17	2.6	4.74	6.01	6.22	2.4	6.42	4.47	5.54	3.57	10.29	5.53	0.98	2.15	1.22	1.4	9.4
XM_028855123.2	Magi2	membrane associated guanylate kinase, WW and PDZ domain containing 2 (Magi2), transcript variant X12, mRNA	0.09	0.08	0.25	0.09	0.12	0.02	0.1	0.05	0.08	0.09	0.04	0.09	0.05	0.09	0.08	0.04	0.05	0.00998	0.00872	0.04
XM_028855129.1	Phtf2	putative homeodomain transcription factor 2 (Phtf2), transcript variant X1, mRNA	3.37	4.82	2.03	1.95	3.18	1.85	3.21	1.81	3.04	3.42	1.72	1.54	1.67	3.31	3.24	6.77	7.23	0.35	0.35	2.07
XM_028855130.2	Phtf2	putative homeodomain transcription factor 2 (Phtf2), transcript variant X2, mRNA	0	0	0.79	0	0	0.48	0	0	0	0	0	0	0	0	0.38	0.13	0	0	0	0.76
XM_028855131.2	Phtf2	putative homeodomain transcription factor 2 (Phtf2), transcript variant X3, mRNA	0	0	0.21	0	0.27	0	0	0	0	0	0	0	0	0	0	0.08	0.05	0	0	0.25
XM_028855132.2	Phtf2	putative homeodomain transcription factor 2 (Phtf2), transcript variant X4, mRNA	0.1	0.46	0.58	0.17	0.48	0.61	0.95	0	0.57	1.2	0.38	0.18	0	0.13	0	1.49	1.85	0.03	0	0.59
XM_028855133.2	Tmem60	transmembrane protein 60 (Tmem60), mRNA	9.7	10.95	7.85	5.33	6.82	8.72	10.31	5.23	6.66	10.75	5.23	6.01	3.92	10.45	8.65	9.09	7.67	1.26	0.89	6.13
XM_028855134.2	Rsbn1l	round spermatid basic protein 1 like (Rsbn1l), mRNA	6.4	10.45	5.99	3.89	6.37	4.72	6.44	3.31	4.47	8.44	2.97	2.16	2.28	4.59	4.9	1.54	2.01	0.72	0.49	3.62
XM_028855135.2	Sntg1	syntrophin gamma 1 (Sntg1), transcript variant X1, mRNA	0	0	0	0	0	0	0	0	0	0	0	0	0	0	0	0	0	0	0	0
XM_028855136.2	Sntg1	syntrophin gamma 1 (Sntg1), transcript variant X2, mRNA	0	0	0.07	0	0	0	0	0.02	0	0	0.00423	0	0.01	0	0	0	0	0	0	0
XM_028855137.2	Thegl	theg spermatid protein like (Thegl), transcript variant X2, mRNA	0.3	0	0	0.84	0	1.45	0.35	0.52	0.81	0	0.99	0.91	0.84	1.37	0	0.24	0.19	0.15	0.00984	0.4
XM_028855142.2	Sntg1	syntrophin gamma 1 (Sntg1), transcript variant X4, mRNA	0	0	0	0	0	0	0	0	0	0	0	0	0	0	0	0	0	0	0	0
XM_028855144.2	Sntg1	syntrophin gamma 1 (Sntg1), transcript variant X5, mRNA	0	0	0	0	0	0	0	0	0	0	0	0	0	0	0	0	0	0	0	0
XM_028855145.2	Sntg1	syntrophin gamma 1 (Sntg1), transcript variant X6, mRNA	0	0	0	0	0	0	0	0	0	0	0	0	0	0	0	0	0	0	0	0
XM_028855146.2	Sntg1	syntrophin gamma 1 (Sntg1), transcript variant X7, mRNA	0	0	0	0	0	0	0	0	0	0	0	0	0	0	0	0	0	0	0	0
XM_028855148.2	Sntg1	syntrophin gamma 1 (Sntg1), transcript variant X8, mRNA	0	0	0	0	0	0	0	0	0	0	0	0	0	0	0	0	0	0	0	0
XM_028855149.2	Sntg1	syntrophin gamma 1 (Sntg1), transcript variant X9, mRNA	0	0.00939	0.06	0	0	0	0	0	0	0	0	0	0	0	0	0	0	0	0	0
XM_028855153.2	Sntg1	syntrophin gamma 1 (Sntg1), transcript variant X10, mRNA	0	0	0	0	0.00978	0	0	0	0	0	0	0	0	0	0	0	0	0	0	0
XM_028855154.2	Sntg1	syntrophin gamma 1 (Sntg1), transcript variant X11, mRNA	0	0	0	0.01	0	0.00702	0	0	0	0	0	0.00526	0	0.01	0	0	0	0	0	0.00534
XM_028855155.2	Pcmtd1	protein-L-isoaspartate (D-aspartate) O-methyltransferase domain containing 1 (Pcmtd1), transcript variant X1, mRNA	15.9	24.81	8.85	8.83	17.16	15.66	14.96	9.23	13.84	12.38	8.36	7.04	4.91	12.12	8.42	2.92	4.89	0.97	1.06	16.44
XM_028855156.2	Pcmtd1	protein-L-isoaspartate (D-aspartate) O-methyltransferase domain containing 1 (Pcmtd1), transcript variant X2, mRNA	3.79	5.09	0.23	1.27	3.12	3.94	4.88	1.1	3.06	0.68	2.96	2.84	2.37	3.71	4.07	1.72	2.06	0.57	0.54	8.12
XM_028855157.2	LOC114681582	alpha-1,3-mannosyl-glycoprotein 2-beta-N-acetylglucosaminyltransferase-like (LOC114681582), mRNA	5.84	5.4	5.97	3.77	7.33	6.53	6.68	0.41	8.55	5.75	4.61	0.42	1.63	0.92	0.69	2.83	3.69	0.97	0.68	2.46
XM_028855158.2	LOC114681586	JNK1/MAPK8-associated membrane protein-like (LOC114681586), mRNA	0	0	0	0	0	0	0	0	0	0	0	0	0	0	0	0	0	0	0	0
XM_028855159.2	Retsat	retinol saturase (Retsat), mRNA	21.14	25.26	18.21	16.84	22.79	24.49	31.1	17.14	25.82	40.75	17.36	12.75	10.33	24.45	16.11	15.9	17.92	3.91	2.86	23.78
XM_028855160.2	Magi1	membrane associated guanylate kinase, WW and PDZ domain containing 1 (Magi1), transcript variant X1, mRNA	0	0	0	0	0	0	0	0	0	0	0	0	0	0	0	0	0	0	0	0
XM_028855161.2	Elmod3	ELMO domain containing 3 (Elmod3), transcript variant X1, mRNA	1.72	2.47	1.34	1.7	2.67	1.71	2.23	2.04	2.64	6.27	0.76	1.23	0	1.23	1.17	1.15	1.57	0.11	0.19	2.18
XM_028855162.2	Elmod3	ELMO domain containing 3 (Elmod3), transcript variant X3, mRNA	0.53	0.99	0.7	0.63	0.32	0.32	0.62	0	0.56	0.31	0.17	0.3	0.63	0.15	1.28	0.32	0	0.46	0.04	0.09
XM_028855163.2	Elmod3	ELMO domain containing 3 (Elmod3), transcript variant X2, mRNA	0.42	0.4	0.21	0	0	0.93	1.34	0	0.69	0.68	0.21	0	1.76	1.33	0.42	0	0.54	0	0	0
XM_028855165.2	Elmod3	ELMO domain containing 3 (Elmod3), transcript variant X6, mRNA	0	0.47	1.51	0.87	0	0.87	1.38	0.98	1.09	0.65	2.05	1.55	0	2.28	0.66	1.31	0.49	0.64	0.37	1.9
XM_028855166.2	Elmod3	ELMO domain containing 3 (Elmod3), transcript variant X7, mRNA	0.94	1.99	0.67	0.7	0	0.21	0.93	0.25	0	1.66	0.85	0.84	0.63	1.66	1.23	0.4	0	0.08	0	0.79
XM_028855167.2	Suclg1	succinate-CoA ligase GDP/ADP-forming subunit alpha (Suclg1), transcript variant X1, mRNA	1.55	0	0.67	0.62	0	1.76	0.95	1.17	0.94	0.46	0.62	1.43	0.43	2.27	1.06	0.59	1.65	0	0.73	0.98
XM_028855168.1	Suclg1	succinate-CoA ligase GDP/ADP-forming subunit alpha (Suclg1), transcript variant X2, mRNA	24.97	25.08	18.81	17.13	22.81	21.87	31.49	21.19	21.34	34.59	17.96	11.88	8.46	22.17	18.97	18.89	28.5	7.71	1.65	18.47
XM_028855169.2	Sh2d6	SH2 domain containing 6 (Sh2d6), transcript variant X3, mRNA	0	0	0	0	0	0	0	0	0	0	0	0.07	0	0.18	0	0	0	0	0	0.19
XM_028855170.2	Magi1	membrane associated guanylate kinase, WW and PDZ domain containing 1 (Magi1), transcript variant X2, mRNA	0	0	0	0	0	0	0	0	0	0	0	0	0	0	0	0	0	0	0	0
XM_028855171.2	Tcf7l1	transcription factor 7 like 1 (Tcf7l1), transcript variant X1, mRNA	0.06	0.1	0.05	0	0.4	0	0	0	0	0.29	0	0	0	0	0	0	0	0	0	0
XM_028855172.2	Tcf7l1	transcription factor 7 like 1 (Tcf7l1), transcript variant X2, mRNA	0	0.12	0	0.18	0	0.03	0.19	0.03	0.01	0	0.07	0	0	0.02	0.07	0.02	0.02	0.02	0	0.03
XM_028855173.2	Tgoln2	trans-golgi network protein 2 (Tgoln2), transcript variant X1, mRNA	5.28	7.89	2.89	2.1	3.94	5.43	4.13	3.69	5.39	6.32	5.35	7.91	8.95	18.45	4.42	3.4	4.41	0	1.61	12.48
XM_028855174.2	Tgoln2	trans-golgi network protein 2 (Tgoln2), transcript variant X2, mRNA	32.55	40.83	23.71	25.85	30.08	43.12	30.45	26.05	21.24	48.05	47.78	67.44	37.45	107.02	49.58	37.56	39.3	10.47	3.88	95.18
XM_028855175.2	Mat2a	methionine adenosyltransferase 2A (Mat2a), mRNA	33.41	44.53	24.4	25.12	28.58	27.24	30.32	21.61	27.16	46.16	23.63	34.32	17.37	62.17	55.25	34.9	59.37	6.66	5.47	37.54
XM_028855176.2	Ggcx	gamma-glutamyl carboxylase (Ggcx), transcript variant X1, mRNA	5.39	8.37	4.75	4.24	5.47	5.38	5.61	3.58	4.01	8.02	5.31	4.59	4.16	9.31	8.31	3.15	4.37	0.95	0.58	6.31
XM_028855177.2	Ggcx	gamma-glutamyl carboxylase (Ggcx), transcript variant X2, mRNA	0	0.23	0.03	0.07	0.02	0.04	0.07	0.03	0.02	0.16	0.03	0.05	0.04	0.08	0.03	0	0.01	0	0.03	0.12
XM_028855178.2	Ggcx	gamma-glutamyl carboxylase (Ggcx), transcript variant X3, mRNA	0.01	0.19	0.03	0.05	0.09	0.08	0.08	0.02	0.09	0.19	0	0.01	0.1	0.09	0.1	0.06	0.11	0	0	0.07
XM_028855179.2	Magi1	membrane associated guanylate kinase, WW and PDZ domain containing 1 (Magi1), transcript variant X3, mRNA	0	0	0	0	0	0	0	0	0	0	0	0	0	0	0	0	0	0	0	0
XM_028855180.2	Ggcx	gamma-glutamyl carboxylase (Ggcx), transcript variant X4, mRNA	0	0	0	0.05	0.07	0	0.1	0	0	0.08	0	0.01	0.02	0.08	0	0	0	0	0.01	0
XM_028855181.2	Usp39	ubiquitin specific peptidase 39 (Usp39), mRNA	12.7	15.35	8.2	9.27	9.86	10.32	12.98	8.83	10	17.86	6.75	6.79	5.08	10.73	10.56	7.2	8.81	2.43	1.09	7.12
XM_028855182.1	Tmem150a	transmembrane protein 150A (Tmem150a), transcript variant X1, mRNA	0	0.8	0.48	0.65	0.74	0.55	0.43	0.53	0.36	1.58	1.14	0	0.3	0	1.15	0.54	0.42	0.19	0.06	1.41
XM_028855184.2	Rnf181	ring finger protein 181 (Rnf181), transcript variant X1, mRNA	23.93	30.15	15.5	19.1	16.83	21.44	25.65	19.21	19.4	30.13	16.82	13.83	9.6	24.11	21.73	15.28	19.98	5.78	2.84	21.05
XM_028855185.2	Rnf181	ring finger protein 181 (Rnf181), transcript variant X2, mRNA	0	0	0.16	0	0	0	0	0	0	0	0.18	0	0	0	0	0	0	0	0	1.96
XM_028855186.2	Magi1	membrane associated guanylate kinase, WW and PDZ domain containing 1 (Magi1), transcript variant X4, mRNA	0	0	0	0	0	0	0	0	0	0	0	0	0	0	0	0	0	0	0	0
XM_028855187.2	Dnah6	dynein axonemal heavy chain 6 (Dnah6), mRNA	0.00687	0.00486	0.00418	0	0	0	0	0	0.00719	0	0	0	0	0	0	0	0.00917	0	0	0
XM_028855188.2	Ptpn2	tyrosine-protein phosphatase non-receptor type 2-like (LOC114681601), mRNA	4.1	6.25	3.85	3.63	3.68	3.65	3.21	2.78	3.31	5.95	3.45	9.33	3.92	6	5.48	3.89	6.77	1.95	0.62	6.79
XM_028855190.2	C3H2orf68	chromosome 3 C2orf68 homolog (C3H2orf68), mRNA	7.73	11.36	6.5	6.41	7.08	7.96	8.34	5.99	6.31	13.25	6.77	7	5.39	10.91	9.76	4.43	6.06	1.48	0.7	9.3
XM_028855191.2	Vamp5	vesicle associated membrane protein 5 (Vamp5), transcript variant X2, mRNA	27.73	167.7	10.21	112.37	103.56	44.57	35.71	41.99	46.18	127.64	123.69	20.92	51.26	32.18	62.83	39.03	6.76	56.64	6.12	34.16
XM_028855192.2	Magi1	membrane associated guanylate kinase, WW and PDZ domain containing 1 (Magi1), transcript variant X5, mRNA	0	0	0	0	0	0	0	0	0	0	0	0	0	0	0	0	0	0	0	0
XM_028855193.2	Capg	capping actin protein, gelsolin like (Capg), mRNA	128.08	107.31	127.32	91.41	95.98	225.24	190.36	135.89	150.23	202.11	170.86	474.49	171.44	509.69	196.14	127.18	206.71	76.48	26.22	409.3
XM_028855194.2	Tmsb10	thymosin beta 10 (Tmsb10), mRNA	112.18	138.62	119.08	105.74	112.37	144.84	185.3	143.3	163.25	203.06	155.82	68.27	65.16	145.48	103.87	207.49	297.65	56.99	28.83	157.05
XM_028855195.2	Kcmf1	potassium channel modulatory factor 1 (Kcmf1), transcript variant X1, mRNA	5.37	5.05	4.97	3.31	8.25	9.33	10.89	4.5	8.74	9.5	8.81	10.93	6.07	17.61	9.06	9.08	10.09	0.97	1.2	14.23
XM_028855196.2	Dhx57	DExH-box helicase 57 (Dhx57), transcript variant X1, mRNA	0.31	1.32	1.08	1.02	1.27	0.76	0.82	0.32	0.86	0.98	0.79	0.29	0.26	0.93	0.77	0.42	0.53	0	0.06	0.48
XM_028855197.2	Dhx57	DExH-box helicase 57 (Dhx57), transcript variant X3, mRNA	1.57	2.76	0.51	0.72	0.41	1.38	1.37	1.05	1.41	3.08	0.01	0.17	0.5	1.18	0.78	0.33	0.51	0.42	0.09	0.98
XM_028855198.2	Gemin6	gem nuclear organelle associated protein 6 (Gemin6), transcript variant X1, mRNA	2.42	8.45	4.44	4.01	5.36	4.74	5.24	2.08	3.47	5.5	3.34	1.33	1.18	2.01	3.41	4.09	2.69	1.66	0.22	2.1
XM_028855199.2	Magi1	membrane associated guanylate kinase, WW and PDZ domain containing 1 (Magi1), transcript variant X6, mRNA	0	0	0	0	0.03	0.01	0	0	0	0	0	0	0	0.00855	0	0	0	0	0	0
XM_028855200.2	Gemin6	gem nuclear organelle associated protein 6 (Gemin6), transcript variant X2, mRNA	0	1.57	0.79	0	0.27	0.37	0	0	0.4	1.69	0.19	0.39	0	0	0	0	0	0	0	0
XM_028855201.1	Morn2	MORN repeat containing 2 (Morn2), transcript variant X1, mRNA	0	0	0	0	0	0.39	0	0	0	0	0	0	0	0	0	0	0	0	0	0
XM_028855203.1	Morn2	MORN repeat containing 2 (Morn2), transcript variant X3, mRNA	0	0.1	0.45	0	0	0	0.52	0.13	0.57	0.16	0	0.08	0	0.04	0	0.09	0.18	0	0	0.24
XM_028855204.2	Hnrnpll	heterogeneous nuclear ribonucleoprotein L like (Hnrnpll), mRNA	9.69	13.52	5.72	6.48	7.29	7.78	7.03	5.02	6.18	11.83	7.59	17.72	7.69	12.41	17.17	8.09	10.04	2.39	1.24	16.98
XM_028855205.2	Magi1	membrane associated guanylate kinase, WW and PDZ domain containing 1 (Magi1), transcript variant X7, mRNA	0	0	0	0	0.05	0.01	0	0.02	0	0	0	0	0	0	0	0	0	0	0	0
XM_028855208.2	Thumpd2	THUMP domain containing 2 (Thumpd2), mRNA	2.67	2.59	1.25	1.67	1.46	3.02	2.68	1.79	2.7	2.95	0.86	0.58	0.61	2.26	2.98	1.51	1.83	0.38	0.21	1.6
XM_028855210.2	Srsf7	serine and arginine rich splicing factor 7 (Srsf7), transcript variant X3, mRNA	25.31	32.56	21.19	14.52	20.47	16.61	25.18	14.34	18.91	30.63	14.81	12.59	13.98	27.06	37.17	21.32	24.36	6.49	3.72	11.27
XM_028855211.2	Srsf7	serine and arginine rich splicing factor 7 (Srsf7), transcript variant X4, mRNA	5.56	8.13	4.17	3.96	5.63	4.65	7.2	5.24	5.09	8.48	4.78	3.2	3.86	7.83	9.23	5.04	6.63	1.63	1.03	2.92
XM_028855212.2	Srsf7	serine and arginine rich splicing factor 7 (Srsf7), transcript variant X5, mRNA	5.43	6.49	3.12	4.53	5.74	2.44	4.77	3.34	1.56	5.54	2.48	1.29	2.88	7.97	5.42	4.56	4.24	1.23	0.71	2.23
XM_028855213.2	Magi1	membrane associated guanylate kinase, WW and PDZ domain containing 1 (Magi1), transcript variant X10, mRNA	0	0	0	0	0	0	0	0	0	0	0	0	0	0	0	0	0	0	0	0
XM_028855214.2	Srsf7	serine and arginine rich splicing factor 7 (Srsf7), transcript variant X6, mRNA	1.65	1.38	1.2	0.81	0.98	1.38	0.98	0.6	0.96	2.49	1.38	0.82	0.25	0.94	2.07	0.82	1.6	0.34	0	0.37
XM_028855215.2	Sos1	SOS Ras/Rac guanine nucleotide exchange factor 1 (Sos1), mRNA	3.95	5.99	3.56	3.08	4.14	3.75	3.98	2.26	3.37	6.07	3.12	6.19	5.89	7.47	7.09	3.78	8.46	1	0.55	6.42
XM_028855217.2	Map4k3	mitogen-activated protein kinase kinase kinase kinase 3 (Map4k3), transcript variant X1, mRNA	0	0	0	0	0	0	0	0	0	0	0	0	0	0.39	0	0	0	0	0	0
XM_028855218.2	Map4k3	mitogen-activated protein kinase kinase kinase kinase 3 (Map4k3), transcript variant X2, mRNA	0.63	0.58	0.22	0.45	0.37	0.57	0.81	0.09	0.43	1.3	0	0.08	0.26	0	0.95	1.17	0.38	0	0	0.3
XM_028855219.2	Map4k3	mitogen-activated protein kinase kinase kinase kinase 3 (Map4k3), transcript variant X3, mRNA	0	0	0	0	0	0	0.17	0	0	0	0	0	0	0.16	0	0	0.42	0	0	0
XM_028855220.2	Map4k3	mitogen-activated protein kinase kinase kinase kinase 3 (Map4k3), transcript variant X4, mRNA	0.21	1.9	1.11	0.8	1.73	1.51	0.52	0.38	0.91	1.12	0.99	0.38	0.32	0.79	0.1	0	0.1	0.21	0.15	0.53
XM_028855221.2	Galm	galactose mutarotase (Galm), mRNA	1.75	3.85	1.45	1.05	2.31	3.31	2.24	1.13	1.53	3.72	1.12	1.78	1.03	1.68	1.49	1.13	0.17	0.84	0.52	2.79
XM_028855222.2	Magi1	membrane associated guanylate kinase, WW and PDZ domain containing 1 (Magi1), transcript variant X11, mRNA	0	0	0	0	0	0	0	0	0	0	0	0	0	0	0	0	0	0	0	0
XM_028855223.2	Cdkl4	cyclin dependent kinase like 4 (Cdkl4), transcript variant X1, mRNA	0	0	0	0	0	0.23	0.12	0.1	0	0	0	0.14	0.07	0.17	0.05	0	0	0	0	0
XM_028855224.2	Tmem178a	transmembrane protein 178A (Tmem178a), mRNA	0	0.07	0.12	0.09	0.28	0.08	0.14	0	0	0.03	0	0	0	0.16	0	0	0	0	0	0.06
XM_028855225.1	LOC114681627	tetratricopeptide repeat protein 39B-like (LOC114681627), mRNA	0	0.11	0.02	0	0	0	0	0	0	0.05	0	0	0	0	0	0	0	0	0	0
XM_028855226.2	Atl2	atlastin GTPase 2 (Atl2), transcript variant X1, mRNA	0	0	0	0	0.31	0	0.12	0	0	0	0	0.25	0	0	0	0	0	0	0	0
XM_028855227.1	Atl2	atlastin GTPase 2 (Atl2), transcript variant X2, mRNA	4.96	6.71	4.46	3.94	4.51	3.91	5.13	2.89	4.97	6.16	2.46	1.87	2.26	3.69	4.51	3.19	5.79	1.05	0.51	2.24
XM_028855228.2	Magi1	membrane associated guanylate kinase, WW and PDZ domain containing 1 (Magi1), transcript variant X12, mRNA	0	0	0	0	0	0	0	0	0	0	0	0	0	0	0	0	0	0	0	0
XM_028855229.2	Etv2	ETS variant transcription factor 2 (Etv2), transcript variant X1, mRNA	0.04	0	0	0	0	0	0	0	0.08	0	0	0	0	0	0	0	0	0	0	0
XM_028855230.2	Etv2	ETS variant transcription factor 2 (Etv2), transcript variant X2, mRNA	0.08	0	0	0	0.11	0	0.04	0.07	0.08	0.13	0.05	0	0	0	0	0.05	0	0	0	0
XM_028855231.2	LOC114681633	free fatty acid receptor 3 (LOC114681633), mRNA	0	0	0	0	0.1	0	0	0	0	0	0	0	0	0.04	0	0	0	0	0	0
XM_028855232.1	Kmt2b	lysine methyltransferase 2B (Kmt2b), mRNA	11.25	17	7.81	9.06	9.62	11.94	13.36	8.36	11.24	20.56	8	8.65	7.41	15.94	11.42	6.29	7.7	1.81	1.24	11.1
XM_028855233.2	LOC114681636	uncharacterized LOC114681636 (LOC114681636), mRNA	4.26	7.12	3.96	3.11	4.57	4.11	3.82	2.39	3.99	6.48	2.89	4.03	3.2	5.68	4.13	1.52	2.21	0.43	0.32	4.15
XM_028855234.2	Magi1	membrane associated guanylate kinase, WW and PDZ domain containing 1 (Magi1), transcript variant X13, mRNA	0	0	0	0	0	0	0	0	0	0	0	0	0	0	0	0	0	0	0	0
XM_028855235.2	Clip3	CAP-Gly domain containing linker protein 3 (Clip3), transcript variant X1, mRNA	0	0.28	0.5	0.24	0	0.45	0.61	0	0.24	0.52	0	0	0	0.42	0.65	0	0	0	0	0
XM_028855236.2	Clip3	CAP-Gly domain containing linker protein 3 (Clip3), transcript variant X2, mRNA	0.53	0	0	0	0.3	0	0	0.12	0	0	0.14	0	0.04	0	0	0.03	0.02	0	0.06	0.08
XM_028855238.1	LOC114681638	cytochrome c oxidase subunit 7A1, mitochondrial (LOC114681638), mRNA	0.11	0.31	3.06	0.27	7.52	0.17	0.72	0	0.11	1.19	0	0.19	0	0.21	0.68	1.64	0.58	1.86	0	0
XM_028855239.2	Tyrobp	transmembrane immune signaling adaptor TYROBP (LOC114681639), mRNA	134.84	141.48	112.61	139.24	146.48	293.32	187.08	233.28	135.13	291.55	638.18	770.37	297.44	875.69	319.83	287.89	434.55	164.51	33.21	708.92
XM_028855240.2	Hcst	hematopoietic cell signal transducer (Hcst), transcript variant X1, mRNA	17.59	26.44	12.11	18.79	10.65	14.18	20.53	13.45	13.43	29.2	16.5	10.41	6.78	17.75	13.59	4.29	5.6	7.38	1.95	6.67
XM_028855241.2	Hcst	hematopoietic cell signal transducer (Hcst), transcript variant X2, mRNA	12.66	17.13	10.41	6.16	7.95	4.76	16.24	10.5	4.95	14.03	11.36	6.37	2.96	17.55	8.91	3.14	5.68	4.75	1.59	5.24
XM_028855242.2	Magi1	membrane associated guanylate kinase, WW and PDZ domain containing 1 (Magi1), transcript variant X14, mRNA	0	0	0	0	0	0	0	0	0	0	0	0	0	0	0	0	0	0	0	0
XM_028855243.2	Zfp790	zinc finger protein 790-like (LOC114681641), transcript variant X1, mRNA	5.31	7.13	5.21	3.3	4.03	4.37	4.82	2.44	3.84	6.16	3.71	6.84	3.66	8.09	6.47	1.71	2.36	0.73	0.55	5.85
XM_028855244.2	Zfp790	zinc finger protein 790-like (LOC114681641), transcript variant X2, mRNA	0.4	0.83	0.57	0.32	1.05	0.67	0.64	0.52	0.75	0.86	0.29	0.8	0.27	0.65	0.69	0.83	0.97	0.15	0	0.55
XM_028855245.2	Arhgap33	Rho GTPase activating protein 33 (Arhgap33), transcript variant X1, mRNA	0	0.62	0	0.19	0	0	0.34	0	0.28	0.14	0	0	0.31	0	0.59	0.46	0	0	0	0
XM_028855246.2	Arhgap33	Rho GTPase activating protein 33 (Arhgap33), transcript variant X2, mRNA	0.78	0.73	0.53	0.53	0.22	0.86	0.59	0.11	0.61	1.04	0	0	0.42	0.42	1.33	0.09	0.09	0	0	0.53
XM_028855247.2	Arhgap33	Rho GTPase activating protein 33 (Arhgap33), transcript variant X3, mRNA	0.48	0.44	0	0	0	0	0.59	0	0	0.14	0.65	0.15	0	0	0.66	0	0	0	0	0
XM_028855248.2	Arhgap33	Rho GTPase activating protein 33 (Arhgap33), transcript variant X4, mRNA	0.9	1.26	0.83	0.94	1.72	1.48	1.79	0.9	1.4	2.8	0	0.24	0.01	0.98	1.62	0.65	0.22	0.15	0.26	0.2
XM_028855249.1	Mag	myelin associated glycoprotein (Mag), transcript variant X1, mRNA	0	0	0	0	0	0	0	0	0	0	0	0	0	0	0	0	0	0	0	0
XM_028855250.2	Mag	myelin associated glycoprotein (Mag), transcript variant X2, mRNA	0	0	0	0	0	0	0	0	0	0	0	0	0	0	0	0	0	0	0	0
XM_028855252.2	Magi1	membrane associated guanylate kinase, WW and PDZ domain containing 1 (Magi1), transcript variant X15, mRNA	0	0	0	0	0	0	0	0	0	0	0	0	0	0	0	0	0	0	0	0
XM_028855253.1	Mag	myelin associated glycoprotein (Mag), transcript variant X4, mRNA	0	0.08	0.33	0	0.15	0.12	0	0.03	0.07	0.13	0	0	0.08	0.05	0	0.05	0.07	0	0	0.17
XM_028855254.1	LOC114681644	cytochrome c oxidase subunit 6B1 (LOC114681644), mRNA	82.48	129	98.2	98.16	100.02	107.35	131.85	83.71	88.49	155.51	106.68	87.72	55.99	115.67	127.58	102.23	130.15	60.39	25.38	57.55
XM_028855259.2	Lin37	lin-37 DREAM MuvB core complex component (Lin37), mRNA	8.72	12.25	7.28	6.48	5.07	8.61	10.95	8.01	6.98	13.84	6.48	5.98	5.11	9.79	7.62	4.06	4.83	1.89	0.98	6.88
XM_028855260.2	Hspb6	heat shock protein family B (small) member 6 (Hspb6), mRNA	0.5	1.38	1.49	0.47	5.15	0.58	1.03	0.35	0.89	1.24	0.25	0.36	0.67	0.52	0.49	1.36	0.17	1.18	0.28	0.63
XM_028855261.2	Magi1	membrane associated guanylate kinase, WW and PDZ domain containing 1 (Magi1), transcript variant X16, mRNA	0	0	0	0	0	0	0	0	0	0	0	0	0	0	0	0	0	0	0	0
XM_028855262.2	Dmkn	dermokine (Dmkn), transcript variant X1, mRNA	0	0	0	0	0	0	0	0	0	0	0	0	0	0	0	0	0	0	0	0
XM_028855263.2	Dmkn	dermokine (Dmkn), transcript variant X3, mRNA	1.24	3.76	4.31	4.47	7.12	11.68	5.61	5.58	8.65	18.71	4.67	0.76	0.51	9.45	1.79	14.32	10.59	0.1	0.17	10.97
XM_028855264.2	Atp4a	ATPase H+/K+ transporting subunit alpha (Atp4a), transcript variant X1, mRNA	0	0	0	0	0	0	0.00656	0	0	0	0	0	0	0	0	0	0.03	0	0	0
XM_028855266.2	Atp4a	ATPase H+/K+ transporting subunit alpha (Atp4a), transcript variant X2, mRNA	0	0.02	0	0	0.00884	0	0	0	0	0	0.05	0	0.02	0	0	0.02	0	0	0	0
XM_028855269.2	Gapdhs	glyceraldehyde-3-phosphate dehydrogenase, spermatogenic (Gapdhs), transcript variant X2, mRNA	0	0	0	0.13	0	0	0	0	0	0	0	0	0	0	0	0	0	0	0	0
XM_028855270.2	Magi1	membrane associated guanylate kinase, WW and PDZ domain containing 1 (Magi1), transcript variant X17, mRNA	0	0	0	0	0	0	0	0	0	0	0	0	0	0	0	0	0	0	0	0
XM_028855271.2	Tmem147	transmembrane protein 147 (Tmem147), transcript variant X1, mRNA	16.72	16.91	12.15	11.06	11.12	14.69	19.71	11.52	14.82	21.36	9.5	6.12	4.67	11.78	15.33	20.87	34.32	4.45	2.21	5.69
XM_028855272.1	Rbm42	RNA binding motif protein 42 (Rbm42), transcript variant X1, mRNA	16.74	18.88	15.26	14.14	14.43	22.09	28.67	17.55	17.12	31.43	19.54	18.35	9.33	26.75	13.09	22.08	22.73	6.09	2.91	29.51
XM_028855273.2	Rbm42	RNA binding motif protein 42 (Rbm42), transcript variant X2, mRNA	10.26	12.86	4.3	6.94	5.8	10.03	10.46	6.9	8.57	12.11	8.83	6.47	6.94	10.2	8.45	7.93	11.48	4.67	1.1	6.45
XM_028855274.2	Tbcb	tubulin folding cofactor B (Tbcb), mRNA	14.71	21.53	12.1	12.14	16.09	20.63	29.59	18.72	14.9	27.19	14.78	11.42	9.04	17.15	9.93	11.68	12.75	6.27	2.99	16.86
XM_028855276.2	Polr2i	RNA polymerase II subunit I (Polr2i), transcript variant X1, mRNA	0	0	0	0	0.09	0	0	0.12	0	0	0.17	9.36	0.09	0	0	0	0	9.12	0	0
XM_028855277.2	Ovol3	ovo like zinc finger 3 (Ovol3), mRNA	1.91	2.54	1.9	1.5	1.48	1.85	1.69	1.71	1.85	3.33	6.05	4.65	5.71	12.98	6.94	2.28	2.64	0.67	0.4	5.2
XM_028855278.2	Magi1	membrane associated guanylate kinase, WW and PDZ domain containing 1 (Magi1), transcript variant X18, mRNA	0	0.01	0.03	0	0.01	0	0	0	0	0	0.00985	0.00867	0	0	0	0	0.00996	0.02	0	0.02
XM_028855279.2	Kirrel2	kirre like nephrin family adhesion molecule 2 (Kirrel2), mRNA	0.04	0	0.03	0	0.02	0.02	0	0.02	0	0	0.02	0	0	0.03	0	0	0	0	0	0
XM_028855280.2	Upk1a	uroplakin 1A (Upk1a), transcript variant X1, mRNA	0	0	0	0	0	0	0	0	0	0	0	0	0	0	0	0	0	0	0	0
XM_028855282.2	U2af1l4	U2 small nuclear RNA auxiliary factor 1 like 4 (U2af1l4), transcript variant X1, mRNA	7.59	13.95	7.82	10.99	8.78	10.57	11.6	5.53	10.01	14.88	5.48	5.44	5.32	9.78	11.56	6.92	7.94	4.73	1.94	5.58
XM_028855283.2	U2af1l4	U2 small nuclear RNA auxiliary factor 1 like 4 (U2af1l4), transcript variant X2, mRNA	11.02	9.01	5.79	4.93	4.6	6.91	8.55	7.35	5.01	13.34	3.19	1.8	1.96	7.02	1.31	3.39	5.27	0	0	3.51
XM_028855284.1	Psenen	presenilin enhancer, gamma-secretase subunit (Psenen), mRNA	62.95	68.15	48.59	51.82	48.27	62.91	73.69	55.18	60.66	88.84	62.67	57.14	38.99	83.65	58.48	46	52.27	26.01	10.71	62.84
XM_028855285.2	Capns1	calpain small subunit 1 (Capns1), mRNA	129.01	174.97	139.18	132.85	123.41	142.91	157.03	117.42	154.91	171.49	116.49	112.99	116.37	144.38	122.16	102.69	104.22	116.99	69.87	158.09
XM_028855286.2	Magi1	membrane associated guanylate kinase, WW and PDZ domain containing 1 (Magi1), transcript variant X19, mRNA	0	0.02	0.05	0	0.02	0	0	0	0	0.02	0.00493	0.00868	0	0	0	0	0.00998	0.01	0	0
XM_028855287.2	Haus5	HAUS augmin like complex subunit 5 (Haus5), mRNA	6.34	7.65	3.74	4.62	4.25	5.5	7.01	4.64	5.42	9.34	2.46	1.75	2.82	5.1	5.76	2.95	2.3	1.32	0.83	3.04
XM_028855288.2	Cd22	CD22 molecule (Cd22), transcript variant X4, mRNA	27.57	30.7	28.27	16.06	25.14	25.13	42.23	21.64	23.47	34.15	15.93	4.52	7.83	19.17	7.04	6.37	9.36	4.1	2.57	1.58
XM_028855289.2	Lrfn3	leucine rich repeat and fibronectin type III domain containing 3 (Lrfn3), mRNA	0.01	0	0.05	0.03	0.14	0.04	0.06	0.05	0.03	0.06	0.04	0.03	0.1	0.07	0.02	0.06	0.16	0	0	0.08
XM_028855290.2	Syne4	spectrin repeat containing nuclear envelope family member 4 (Syne4), transcript variant X1, mRNA	0	0	0	0	0	0.15	0	0	0	0	0	0	0	0.16	0	0.09	0	0	0	0
XM_028855291.2	Alkbh6	alkB homolog 6 (Alkbh6), transcript variant X1, mRNA	0.45	1.31	1.18	0	1.96	0.63	1.96	1.46	1.46	2.22	0.98	0.76	0.58	0.92	0.98	2.48	2.74	0	0	0.42
XM_028855292.2	Proser3	proline and serine rich 3 (Proser3), transcript variant X1, mRNA	0	0	0	0	0	0	0	0	0	0	0	0	0	0	0	0	0	0	0	0
XM_028855293.2	Proser3	proline and serine rich 3 (Proser3), transcript variant X2, mRNA	0.75	0.83	1.06	0.82	1.12	0.51	2.04	0.51	1.11	2.41	1.01	0.33	0.17	0.93	1.46	0	0.36	0	0.17	0.3
XM_028855295.2	Magi1	membrane associated guanylate kinase, WW and PDZ domain containing 1 (Magi1), transcript variant X20, mRNA	0	0	0	0	0	0	0	0	0	0	0	0	0	0	0	0	0	0	0	0
XM_028855297.2	Proser3	proline and serine rich 3 (Proser3), transcript variant X4, mRNA	2.9	4.39	1.29	2.1	1.46	2.91	1.1	1.19	2.26	4.05	0.18	0.21	1.14	2.13	3.47	0.37	0	0	0.14	0.88
XM_028855299.2	Nphs1	NPHS1 adhesion molecule, nephrin (Nphs1), mRNA	0.03	0	0.06	0	0.03	0.02	0.02	0	0	0.02	0.09	0.02	0.02	0.04	0.04	0.00595	0.01	0.02	0	0.02
XM_028855300.2	Wdr62	WD repeat domain 62 (Wdr62), transcript variant X3, mRNA	0.43	0.66	0.15	0.33	0.39	0.47	0.66	0.29	0.47	0.97	0.13	0.13	0.16	0.55	0.82	0.63	0.3	0.09	0.14	0.7
XM_028855301.2	Sdhaf1	succinate dehydrogenase complex assembly factor 1 (Sdhaf1), mRNA	9.57	8.13	4.28	4.7	5.78	6.78	11.13	4.55	4.88	9.26	4.84	2.52	2.25	5.26	6.51	2.85	4.22	2.95	0.21	5.42
XM_028855303.2	Nfkbid	NFKB inhibitor delta (Nfkbid), transcript variant X1, mRNA	0.97	2.27	1.28	0	0	0.47	1.19	0.58	0	1.15	0	0.4	0.97	1.69	0.74	0.49	1.15	0	0.65	0
XM_028855304.2	Nfkbid	NFKB inhibitor delta (Nfkbid), transcript variant X2, mRNA	1.82	1.96	2.66	3.03	3.17	2.92	4	3.12	2.58	5.09	7.95	5.07	2.96	14.28	8.54	3.18	5.28	2.38	1.22	5.22
XM_028855305.2	Ffar2	free fatty acid receptor 2 (Ffar2), transcript variant X1, mRNA	0.56	0.64	0.58	1.12	1.32	1.45	1.61	1.74	1.4	1.38	9.77	15.21	4.73	14.23	8.26	0.96	2.02	2.52	1.32	14.55
XM_028855306.2	Zbtb32	zinc finger and BTB domain containing 32 (Zbtb32), transcript variant X2, mRNA	0.73	0.74	0.32	0.89	2.05	2.58	1.42	0.36	2.25	0.67	1.13	0.62	0.84	1.4	1.3	1.47	1.77	0.03	0.35	0.12
XM_028855309.2	Magi1	membrane associated guanylate kinase, WW and PDZ domain containing 1 (Magi1), transcript variant X21, mRNA	0	0	0.03	0	0.00523	0	0	0	0	0	0.00986	0	0	0	0.01	0	0	0.01	0	0.0088
XM_028855311.1	Ffar1	free fatty acid receptor 1 (Ffar1), mRNA	0	0	0	0	0	0	0	0	0	0	0	0	0	0	0	0	0	0	0	0
XM_028855314.2	Znf585a	zinc finger protein 585A (Znf585a), transcript variant X1, mRNA	0.33	0	0.51	0.09	0.29	0.41	0	0	0.4	0.5	0	0	0.33	0	0.25	0	0.16	0	0	0.41
XM_028855315.2	Znf585a	zinc finger protein 585A (Znf585a), transcript variant X2, mRNA	0	1.11	0.24	0.28	0.33	0.21	0.3	0.13	0	0.2	0.2	0.32	0	0.47	0.23	0	0.09	0	0	0.08
XM_028855316.2	Znf585a	zinc finger protein 585A (Znf585a), transcript variant X3, mRNA	2.42	1.89	1.49	1.28	1.73	1.24	2.24	1.02	1.8	2.21	1.17	0.52	0.57	1.3	1.13	0.64	0.59	0.21	0.24	0.49
XM_028855318.2	Magi1	membrane associated guanylate kinase, WW and PDZ domain containing 1 (Magi1), transcript variant X23, mRNA	0	0	0.03	0	0	0	0	0	0	0	0	0	0.02	0	0	0	0	0	0.00529	0
XM_028855322.2	Znf567	zinc finger protein 567 (LOC114681681), transcript variant X1, mRNA	0.47	0.85	0.37	0.48	0.41	0.54	0.54	0.23	0.2	0.48	0.29	0.04	0.27	0.3	0.71	0.15	0	0.05	0.02	0.02
XM_028855324.2	Znf567	zinc finger protein 567 (LOC114681681), transcript variant X2, mRNA	1.01	0.45	0.93	0.58	0	1.22	0	0	0	0	0.15	0	0	0	0.76	0	0.13	0	0	0
XM_028855325.2	Znf567	zinc finger protein 567 (LOC114681681), transcript variant X3, mRNA	0.18	0.82	0	0	0.3	0	0.71	0	0.37	0.57	0.06	0.09	0.3	0.57	0	0.27	0	0	0	0.18
XM_028855326.2	Znf567	zinc finger protein 567 (LOC114681681), transcript variant X4, mRNA	0.18	0.68	0.19	0.79	0.89	0.24	0.28	0.25	1.56	1.63	0.26	1.18	0.41	0.72	0	0.12	0.52	0	0.14	0.76
XM_028855327.2	Znf567	zinc finger protein 567 (LOC114681681), transcript variant X5, mRNA	0.27	0.36	0.27	0.09	0.24	0.54	0.42	0.49	0.15	0.32	0.35	0.11	0	0.46	1.13	0.74	0.06	0.18	0	0.3
XM_028855328.2	Znf565	zinc finger protein 565 (Znf565), transcript variant X1, mRNA	0	0	0	0	0.06	0	0	0.12	0.14	0	0	0	0	0	0	0	0.41	0	0	0.1
XM_028855330.2	Znf565	zinc finger protein 565 (Znf565), transcript variant X2, mRNA	0	0.25	0.19	0	0	0.25	0.3	0	0	0.25	0	0	0.16	0.17	0	0.06	0.03	0	0	0
XM_028855331.2	Znf565	zinc finger protein 565 (Znf565), transcript variant X3, mRNA	0.05	0	0.15	0.11	0.16	0	0.06	0	0	0	0.18	0.12	0	0.26	0.32	0.06	0	0.03	0.03	0.19
XM_028855333.2	LOC114681682	zinc finger protein 569 (LOC114681682), mRNA	2.52	4.36	2.43	1.65	2.59	2.08	2.33	1.14	1.93	3.16	1.23	1.65	1.31	2.27	3	0.79	0.95	0.35	0.39	2.35
XM_028855334.2	Znf568	zinc finger protein 568 (Znf568), transcript variant X2, mRNA	0	0	0	0	0	0	0.98	0	0	0	0	0.02	0	0	0	0	0	0	0.31	0
XM_028855335.2	Znf568	zinc finger protein 568 (Znf568), transcript variant X1, mRNA	2.44	2.4	1.49	1.28	1.71	1.67	1.04	1.33	0.48	1.28	0.84	1.34	1.24	1.79	2.96	0.81	1.75	0.24	0	1.65
XM_028855338.2	LOC114681684	zinc finger protein 420 (LOC114681684), transcript variant X6, mRNA	1.43	2.44	1.41	0.9	1.63	1.5	1.83	1.21	0.84	2.1	0.91	0.97	0.79	1.94	0.68	0.55	0.66	0.05	0.2	1.05
XM_028855340.2	LOC114681687	zinc finger protein 790-like (LOC114681687), transcript variant X2, mRNA	0	0	0	0	0	0	0	0	0	0	0	0	0	0	0	0	0	0	0	0
XM_028855341.2	LOC114681687	zinc finger protein 790-like (LOC114681687), transcript variant X4, mRNA	0	0	0	0	0	0	0	0	0	0	0	0	0	0	0	0	0	0	0	0
XM_028855342.2	LOC119086098	zinc finger protein 14 (LOC119086098), transcript variant X1, mRNA	1.01	1.49	0.69	0.45	0.84	0.78	0.76	0.99	0.6	1.93	0.32	0	0.29	0	0.61	0	0.23	0.06	0	0.19
XM_028855343.2	LOC119086098	zinc finger protein 14 (LOC119086098), transcript variant X2, mRNA	0.69	0.98	0.45	0.54	0.42	0.51	0.4	0	0.51	0.12	0.56	0.43	0.32	0.89	0.57	0.45	0.17	0.03	0.11	0.08
XM_028855345.2	Zfp82	ZFP82 zinc finger protein (Zfp82), transcript variant X1, mRNA	0.87	1.15	0.71	0.84	0.6	0.52	1.07	0.3	0.73	0.57	0.33	0.28	0.36	0.61	0.84	0.24	0.75	0.18	0	0.23
XM_028855346.2	Znf566	zinc finger protein 566 (Znf566), transcript variant X2, mRNA	0.84	0	0.09	0.32	0	0	0.15	0	0	0.43	0.44	0	0	0.31	0	0	0.07	0	0.17	0.05
XM_028855348.2	Znf570	zinc finger protein 570 (Znf570), transcript variant X1, mRNA	0.47	0.45	0.24	0.15	0.57	0.15	0.4	0.13	0.32	0.56	0	0.24	0.16	0.53	0.43	0.12	0.12	0	0.05	0.18
XM_028855350.1	LOC114681691	zinc finger protein 383 (LOC114681691), mRNA	3.27	5.58	3.29	2.17	3.59	2.32	2.42	1.59	2.41	3.38	1.6	2.02	1.14	3.92	3.36	1.27	1.32	0.15	0.38	2.36
XM_028855352.2	Znf260	zinc finger protein 260 (Znf260), transcript variant X1, mRNA	3.69	5.28	3.49	1.73	3.19	1.77	2.54	1.57	2.39	3.76	1.58	1.14	1.03	2.87	5.9	1.09	1.66	0.4	0.35	2.12
XM_028855353.2	Lrig1	leucine rich repeats and immunoglobulin like domains 1 (Lrig1), mRNA	3.07	3.94	1.34	2.09	1.98	1.88	3.31	1.62	2.44	3.66	0.82	1.29	1.68	2.34	5.57	0.52	0.97	0.43	0.51	1.14
XM_028855354.2	Znf146	zinc finger protein 146 (Znf146), transcript variant X1, mRNA	14.79	13.78	12.6	8.33	10.8	8.74	10.25	6.61	9.82	16.65	7.94	5.63	4.28	10.51	14.14	6.24	9.68	1.62	1.54	5.78
XM_028855355.2	Prodh2	proline dehydrogenase 2 (Prodh2), transcript variant X2, mRNA	0	0	0	0	0	0	0	0	0	0	0	0	0	0	0	0	0	0	0	0
XM_028855356.2	Sbsn	suprabasin (Sbsn), transcript variant X1, mRNA	0.02	0	0	0	0	0	0	0	0	0.01	0	0	0	0	0	0	0.03	0	0	0
XM_028855357.2	Sbsn	suprabasin (Sbsn), transcript variant X2, mRNA	0	0	0	0	0	0	0	0	0.06	0	0	0	0	0	0	0	0	0	0	0
XM_028855359.2	Slc25a26	solute carrier family 25 member 26 (Slc25a26), transcript variant X1, mRNA	4.49	5.64	2.9	2.74	3.15	3.89	5.73	2.45	2.95	5.59	1.52	0.73	0.82	2.22	1.82	2.5	3	0.77	0.4	0.37
XM_028855361.2	Gbp2b	guanylate-binding protein 1-like (LOC114681707), transcript variant X1, mRNA	0.66	2.91	1.7	2.82	1.38	1.75	1.03	1.64	1.01	4.35	3.54	5.64	3.7	10.97	7.97	25.97	75.98	2.07	0.29	7.58
XM_028855362.2	Gbp1	guanylate-binding protein 1-like (LOC114681707), transcript variant X2, mRNA	0	0.65	0.13	0	0	0.63	0.4	0	0.25	1.19	0.47	1.49	0	3.07	1.69	3.64	15.37	0.25	0	0.71
XM_028855363.2	Gbp1	guanylate-binding protein 1-like (LOC114681708), mRNA	0.34	0.46	0.56	0.19	0.22	0.41	0.37	0.35	0.29	1.95	1.37	1.98	1.03	2.13	1.86	4.73	8.2	0.41	0.42	1.25
XM_028855364.2	Gbp1	guanylate-binding protein 1-like (LOC114681710), transcript variant X2, mRNA	0.85	0.49	1.57	1.58	0.66	1.49	1.12	0.58	0.31	3.62	0.65	1.18	0.61	1.17	2.71	0.9	3.15	0.19	0.16	0
XM_028855366.2	Slc25a26	solute carrier family 25 member 26 (Slc25a26), transcript variant X2, mRNA	0.31	0	0	0	0	0	0	0	0	0	0	0	0	0.78	0	0	0.65	0	0.21	0
XM_028855367.2	LOC114681711	guanylate-binding protein 1-like (LOC114681711), transcript variant X1, mRNA	0.17	0	0	0.22	0.37	0.05	0.23	0.21	0.33	0	0.08	0.23	0	0.22	0.47	0.1	0.32	0	0	0
XM_028855369.2	Gbp1	guanylate-binding protein 1-like (LOC114681711), transcript variant X2, mRNA	0.53	1.69	1.63	0.63	0.58	0.97	1.57	0.64	0.39	3.01	1.98	3.1	2.27	3.96	2.04	9.23	17.83	0.95	0.38	0.98
XM_028855371.2	Srp72	signal recognition particle 72 (Srp72), mRNA	16.99	24.11	12.99	12.79	14.57	17.14	18.7	10.2	15.66	23.91	9.39	9.02	7.28	18.4	19.26	18.86	32.75	3	1.87	13.6
XM_028855374.2	Kyat3	kynurenine aminotransferase 3 (Kyat3), transcript variant X2, mRNA	1.13	1.18	0.54	0.95	1.86	1.72	0.68	0.35	0.45	2.71	1.32	1.26	0	2.76	0.69	2.02	6.22	0.24	0	0.86
XM_028855377.2	Slc25a26	solute carrier family 25 member 26 (Slc25a26), transcript variant X3, mRNA	0.2	0.11	0	0	0	0	0	0	0	0	0	0	0	0.15	0	0	0	0	0	0
XM_028855379.2	Pdlim5	PDZ and LIM domain 5 (Pdlim5), transcript variant X1, mRNA	0	0	0	0	0.16	0	0	0	0	0	0	0	0	0	0	0	0	0	0	0
XM_028855380.2	Pdlim5	PDZ and LIM domain 5 (Pdlim5), transcript variant X2, mRNA	0	0	0	0	0	0	0	0	0	0	0	0	0	0	0	0	0	0	0	0
XM_028855381.2	Pdlim5	PDZ and LIM domain 5 (Pdlim5), transcript variant X3, mRNA	0	0	0	0	0	0.05	0	0	0	0.1	0	0	0	0	0	0	0	0	0	0
XM_028855382.2	Pdlim5	PDZ and LIM domain 5 (Pdlim5), transcript variant X5, mRNA	3.78	9.13	3.4	5.85	4.39	6.88	6.08	3.04	3.89	9.63	3.24	3.02	2.92	8.13	4.45	2.77	5.93	0.37	0.49	5.59
XM_028855383.2	Pdlim5	PDZ and LIM domain 5 (Pdlim5), transcript variant X6, mRNA	0	0	0.29	0	0	0	0	0	0	0	0	0	0	0	0	0	0	0	0	0.13
XM_028855384.2	Pdlim5	PDZ and LIM domain 5 (Pdlim5), transcript variant X7, mRNA	2.12	0.99	2.13	0	3.76	0.16	1.93	0.41	1.46	2.24	0.58	1.26	0.46	1.96	1.66	0.88	0.64	0.32	0	1.08
XM_028855385.2	Pdlim5	PDZ and LIM domain 5 (Pdlim5), transcript variant X8, mRNA	0	0.1	0	0.03	0.64	0	0.16	0.04	0.13	0.3	0.05	0.12	0.12	0.08	0.16	0.03	0	0.06	0	0.1
XM_028855386.2	Pdlim5	PDZ and LIM domain 5 (Pdlim5), transcript variant X9, mRNA	0	0	0	0	0.43	0	0	0	0	0	0	0	0	0.11	0	0	0	0	0	0
XM_028855387.2	Pdlim5	PDZ and LIM domain 5 (Pdlim5), transcript variant X10, mRNA	0	0	0.29	0	0	0	0	0	0	0	0	0	0	0	0	0	0	0	0	0
XM_028855388.2	Gbp4	guanylate-binding protein 4-like (LOC114681718), mRNA	3.2	6.54	5.66	4.74	3.9	7.69	6.6	7.1	4.5	19.58	13.82	20.58	6.66	25.82	11.85	18.19	51.25	2.75	2.96	11.89
XM_028855389.2	Kbtbd8	kelch repeat and BTB domain containing 8 (Kbtbd8), mRNA	1.96	3.8	1.7	1.16	1.83	1.61	1.45	1.17	1.12	2.43	0.8	1.19	0.62	2.01	2.38	1.18	2.01	0.2	0.19	1.25
XM_028855390.2	Gbp4	guanylate-binding protein 4-like (LOC114681719), mRNA	32.64	60.41	33.15	29.84	35.79	32.14	35.05	32.58	33.85	102.48	44.92	61.81	42.85	91.81	44.59	12.91	38.15	6.88	10.41	33.47
XM_028855391.2	LOC114681721	mRNA-capping enzyme-like (LOC114681721), transcript variant X1, mRNA	0	0	0	0	0	0.02	0	0	0	0	0	0	0	0	0	0	0	0	0	0
XM_028855392.2	LOC114681721	mRNA-capping enzyme-like (LOC114681721), transcript variant X2, mRNA	0.1	0.91	0.21	0.03	0.1	0.27	0.14	0.04	0.11	0.25	0.2	0.24	0.22	0.4	0.33	0.1	0.04	0.06	0	0.31
XM_028855394.2	Bmpr1b	bone morphogenetic protein receptor type 1B (Bmpr1b), transcript variant X1, mRNA	0	0	0.13	0	0	0	0	0	0	0	0	0	0	0	0	0	0	0	0	0
XM_028855395.1	Bmpr1b	bone morphogenetic protein receptor type 1B (Bmpr1b), transcript variant X2, mRNA	0	0	0	0	0	0	0	0	0	0	0.01	0	0	0	0	0	0	0	0	0
XM_028855396.1	Bmpr1b	bone morphogenetic protein receptor type 1B (Bmpr1b), transcript variant X3, mRNA	0	0	0	0	0	0	0	0	0	0	0	0	0	0	0	0	0	0	0	0
XM_028855397.1	Bmpr1b	bone morphogenetic protein receptor type 1B (Bmpr1b), transcript variant X4, mRNA	0	0	0	0	0.04	0	0	0	0	0	0	0	0	0	0	0	0	0	0	0
XM_028855399.2	Gbp2	guanylate-binding protein 2-like (LOC114681724), mRNA	9.56	8.34	6.04	6.44	5.46	9.47	10.33	7.67	5.3	15.22	8.58	9.02	7.52	15.07	8.16	4.61	7.3	3.44	1.22	8.21
XM_028855400.2	Suclg2	succinate-CoA ligase GDP-forming subunit beta (Suclg2), transcript variant X1, mRNA	24.42	42.55	19.8	18.02	23.84	25.67	27.51	17.41	21.8	38.46	12.35	6.62	6.77	15.13	15.73	9.77	16.26	2.82	1.92	7.56
XM_028855401.1	LOC114681727	olfactory receptor 9 (LOC114681727), mRNA	0	0	0	0	0	0	0	0	0	0	0	0	0	0	0	0	0	0	0	0
XM_028855402.1	LOC114681728	olfactory receptor 6C74-like (LOC114681728), mRNA	0	0	0	0	0	0	0	0	0	0	0	0	0	0	0	0	0	0	0	0
XM_028855403.2	Smarcc2	SWI/SNF related, matrix associated, actin dependent regulator of chromatin subfamily c member 2 (Smarcc2), transcript variant X1, mRNA	2.57	2.33	1.37	1.44	1.58	3.11	1.82	0.99	1.42	2.74	1.12	0.94	0.91	1.93	2.34	0.5	0.98	0	1.07	0.47
XM_028855404.2	Smarcc2	SWI/SNF related, matrix associated, actin dependent regulator of chromatin subfamily c member 2 (Smarcc2), transcript variant X2, mRNA	0	0	0.74	0.4	0	0.73	0.77	0	0	0.38	0	0.82	0	0.14	0	0.21	0	0	0	0
XM_028855405.2	Smarcc2	SWI/SNF related, matrix associated, actin dependent regulator of chromatin subfamily c member 2 (Smarcc2), transcript variant X3, mRNA	12.74	25.2	14.93	11.72	15.72	17.57	27.09	12.69	16.5	35.19	12.58	7.81	8.7	15.31	11.03	9.64	10.63	4.26	1.17	12.23
XM_028855406.2	Smarcc2	SWI/SNF related, matrix associated, actin dependent regulator of chromatin subfamily c member 2 (Smarcc2), transcript variant X4, mRNA	3.96	6.05	3.98	4.4	2.76	3.66	4.22	5.77	7.52	8.4	2.93	1.17	2.73	4.94	3.48	1.93	1.46	0.2	0	2.79
XM_028855409.2	Smarcc2	SWI/SNF related, matrix associated, actin dependent regulator of chromatin subfamily c member 2 (Smarcc2), transcript variant X5, mRNA	0	0	0	0	0	0	0	0	0	0	0	0	0	0	0	0	0	0	0	0
XM_028855410.2	Smarcc2	SWI/SNF related, matrix associated, actin dependent regulator of chromatin subfamily c member 2 (Smarcc2), transcript variant X6, mRNA	5.63	1.1	0.92	3.12	3.28	3.58	0.92	0.65	1.31	1.12	0	0	0	1.05	2.67	0	0.88	0	0	0
XM_028855411.2	Myl6b	myosin light chain 6B (Myl6b), transcript variant X1, mRNA	0.16	0	0.08	0.37	0.68	1.25	1.23	0.94	1.06	1.85	0.85	0.43	0	0.29	0.83	0.85	0.77	0.48	0.89	1.03
XM_028855412.2	Myl6b	myosin light chain 6B (Myl6b), transcript variant X2, mRNA	1.25	1.5	0.83	0.34	0.47	0.97	0.7	0.33	0.37	0.7	0.13	0.34	0.81	1.02	0.43	0	0	0	0	0.35
XM_028855413.2	Tafa1	TAFA chemokine like family member 1 (Tafa1), transcript variant X1, mRNA	0	0	0.13	0	0	0	0	0	0	0	0	0	0	0	0	0	0	0	0	0
XM_028855414.2	Myl6	myosin light chain 6 (Myl6), transcript variant X1, mRNA	30.06	50.09	38.99	30.84	40.97	52.7	55.27	26.81	42.42	47.02	27.83	34.34	30.45	37.85	41.83	36.83	35.35	25.65	10.28	45.49
XM_028855415.2	Myl6	myosin light chain 6 (Myl6), transcript variant X2, mRNA	618.62	959.61	697.46	773.38	620.36	851.67	1016.12	748.59	870.71	925.87	831.18	957.74	682.92	877.9	547.47	829.5	658.79	669.82	297.35	824.85
XM_028855416.1	Cs	citrate synthase (Cs), mRNA	42.7	58.24	35.59	34.88	47.45	48.16	53.44	32.3	38.04	67.75	39.64	38.48	25.14	59.04	43.37	63.48	77.14	11.11	4.5	56.53
XM_028855417.2	Coq10a	coenzyme Q10A (Coq10a), transcript variant X1, mRNA	1.24	0.48	0.1	1.33	1.62	0.92	0	1.01	0	1.46	0.2	0.49	0	0	0.32	0	0.36	0	0.09	0
XM_028855418.2	Coq10a	coenzyme Q10A (Coq10a), transcript variant X2, mRNA	0.24	0.73	0.35	0	0.45	0	0.7	0	0.73	0.66	0	0	0.37	1.28	1.3	0	0	0	0	0.48
XM_028855419.2	Coq10a	coenzyme Q10A (Coq10a), transcript variant X3, mRNA	0.41	0.75	1.07	0.58	1.28	1.1	0.9	0.37	1.21	0.93	0.7	0	0.21	0.65	0.62	0.63	0.11	0.29	0.13	0.16
XM_028855420.1	LOC114681735	olfactory receptor 10P1-like (LOC114681735), mRNA	0	0	0	0	0	0	0	0	0	0	0	0	0	0	0	0	0	0	0	0
XM_028855421.2	Tafa1	TAFA chemokine like family member 1 (Tafa1), transcript variant X2, mRNA	0	0.04	0	0	0.04	0	0	0	0	0	0.05	0	0	0	0	0	0	0	0	0
XM_028855422.1	LOC114681736	olfactory receptor 9 (LOC114681736), mRNA	0	0	0	0	0	0	0	0	0	0	0	0	0	0	0	0	0	0	0	0
XM_028855423.1	LOC114681737	olfactory receptor 9-like (LOC114681737), mRNA	0	0	0	0	0	0	0	0	0	0	0	0	0	0	0	0	0	0	0	0
XM_028855424.2	Rab5b	RAB5B, member RAS oncogene family (Rab5b), mRNA	37.18	42.12	27.73	28.44	32.73	34.95	42.31	30.23	34.17	51.83	30.21	26.51	24.97	51.56	33.49	21.74	23.14	7.85	4.41	43.51
XM_028855425.2	Itga7	integrin subunit alpha 7 (Itga7), transcript variant X9, mRNA	0	0	0.01	0	0	0.06	0	0	0	0	0.06	0.75	0	0.01	0.29	1.17	0.98	0	0	0.37
XM_028855426.2	Itga7	integrin subunit alpha 7 (Itga7), transcript variant X10, mRNA	0	0	0.13	0	0.63	0.08	0.11	0	0	0.02	0.04	0.27	0.55	0.43	0.96	1.43	0.33	0	0	0.35
XM_028855428.2	Itga7	integrin subunit alpha 7 (Itga7), transcript variant X5, mRNA	0	0	0	0	0	0	0	0	0	0	0	0	0	0	0	0	0.45	0	0	0
XM_028855429.2	Mettl7b	methyltransferase like 7B (Mettl7b), mRNA	0	0	0	0	0	0.1	0.12	0	0	0	0	0.04	0	0	0	0.08	0	0	0	0.15
XM_028855431.2	Dnajc14	DnaJ heat shock protein family (Hsp40) member C14 (Dnajc14), mRNA	30.89	43.4	24.95	22.56	26.16	31.15	33.66	22.94	26.22	47.79	28.4	36.74	21.05	44.56	32.25	19.44	25.4	6.8	3.24	41.64
XM_028855432.2	Ormdl2	ORMDL sphingolipid biosynthesis regulator 2 (Ormdl2), mRNA	16.54	17.89	11.05	11.93	14.61	18.7	22.19	13.18	13.4	22.07	14.06	11.44	6.54	17.84	10.8	13.61	15.86	3.62	1.19	10.92
XM_028855433.2	Gls2	glutaminase 2 (Gls2), transcript variant X1, mRNA	0.12	0.07	0.18	0	0.21	0	0	0	0	0.06	0	0	0	0	0.25	0.05	0	0	0.02	0
XM_028855434.2	Gls2	glutaminase 2 (Gls2), transcript variant X2, mRNA	0	0.05	0	0.12	0	0.09	0.06	0.03	0.08	0	0	0	0	0	0	0	0.03	0	0	0.04
XM_028855435.2	Spryd4	SPRY domain containing 4 (Spryd4), mRNA	2.64	2.83	1.64	1.54	2.36	2.55	3.21	2.5	2.06	3.37	1.39	0.94	0.63	2.19	2.27	3.48	4.68	0.36	0.24	0.81
XM_028855436.2	Tafa1	TAFA chemokine like family member 1 (Tafa1), transcript variant X3, mRNA	0	0	0	0	0	0	0	0	0	0	0	0	0	0	0	0	0	0	0	0
XM_028855437.2	Pan2	poly(A) specific ribonuclease subunit PAN2 (Pan2), transcript variant X1, mRNA	11.31	20.07	9.72	11.45	9.81	14	16.74	8.79	10.8	21.88	7.89	6.66	6.53	14.44	12.19	7.89	8.59	2.24	1.07	9.52
XM_028855438.2	Pan2	poly(A) specific ribonuclease subunit PAN2 (Pan2), transcript variant X2, mRNA	3.86	3.36	1.92	1.12	1.23	2.78	4.78	1.21	2.64	3.27	0.74	1.24	1.78	2.15	1.72	2.24	2.07	0.24	0.54	3.88
XM_028855439.2	Stat2	signal transducer and activator of transcription 2 (Stat2), mRNA	24.5	34.58	24.48	22.04	16.57	36.29	39.51	29.68	22.1	73.09	52.28	70.86	41.48	130.13	56.62	24.3	63.11	19.11	9.08	102.43
XM_028855441.2	Il23a	interleukin 23 subunit alpha (Il23a), mRNA	0.84	1.51	0.5	0.52	0.74	0.34	1.3	0.86	0.74	1.16	0.65	0.54	0.59	0.93	0.88	0.31	0.63	0.24	0	0.6
XM_028855442.1	LOC114681749	olfactory receptor 6C76-like (LOC114681749), mRNA	0	0	0	0	0	0	0	0	0	0	0	0	0	0	0	0	0	0	0	0
XM_028855443.1	LOC114681750	olfactory receptor 6C75 (LOC114681750), mRNA	0	0	0	0	0	0	0	0	0	0	0	0	0	0	0	0	0	0	0	0
XM_028855444.2	Esyt1	extended synaptotagmin 1 (Esyt1), mRNA	55.05	83.88	44.01	44.03	47.7	65.14	73.26	50.51	55.05	118.08	52.23	54.25	35.52	66.42	41.04	24.81	24.56	12.15	6	53.48
XM_028855445.2	Gdf11	growth differentiation factor 11 (Gdf11), mRNA	1.45	2.35	1.11	1.15	1.26	1.16	1.24	1.02	1.14	2.04	0.65	0.32	0.79	1.11	1.63	0.19	0.32	0.25	0.07	0.42
XM_028855446.2	Erbb3	erb-b2 receptor tyrosine kinase 3 (Erbb3), mRNA	0.05	0.24	0.12	0.07	0.1	0.1	0.16	0.05	0.09	0.25	0.06	0.03	0.03	0.11	0.1	0.31	0.07	0.07	0.01	0.19
XM_028855447.1	LOC114681756	olfactory receptor 6C2 (LOC114681756), mRNA	0	0	0	0	0	0	0	0	0	0	0	0	0	0	0	0	0.03	0	0	0
XM_028855448.2	LOC114681757	olfactory receptor 6C3-like (LOC114681757), mRNA	0	0	0	0	0	0	0	0	0	0	0	0	0	0	0	0	0	0	0	0
XM_028855449.1	LOC114681758	olfactory receptor 6C2-like (LOC114681758), mRNA	0	0	0	0	0	0	0	0	0	0	0	0	0	0	0	0	0	0	0	0
XM_028855450.2	Pa2g4	proliferation-associated 2G4 (Pa2g4), mRNA	33.26	42.02	23.86	25.11	24.43	26.17	39.48	22.52	26.19	48.86	32.08	20.78	12.98	43.6	46.53	52.84	96.04	10.49	4.53	29.23
XM_028855451.2	Pym1	PYM homolog 1, exon junction complex associated factor (Pym1), transcript variant X1, mRNA	6.93	3.73	1.79	0.98	2.3	2.51	3.36	1.74	6.52	5.24	2.56	1.03	2.23	4.82	2.01	2.33	3.91	0.76	0	2.69
XM_028855452.2	Pym1	PYM homolog 1, exon junction complex associated factor (Pym1), transcript variant X2, mRNA	2.94	2.96	2.8	3.2	2.93	5.85	2.96	3.73	1.14	3.95	1.64	4.32	3.94	2.55	7.12	2.02	5.97	1.2	0	5.82
XM_028855453.1	Pym1	PYM homolog 1, exon junction complex associated factor (Pym1), transcript variant X3, mRNA	0.95	1.92	0.27	0	1.06	0	1	1.7	3.11	3.14	0	0	0.63	0	0	0.65	0	0	0	1.45
XM_028855454.1	Pym1	PYM homolog 1, exon junction complex associated factor (Pym1), transcript variant X4, mRNA	5.65	10.76	5.63	5.02	3.89	4.42	15.34	8.61	8.64	11.21	4.73	5.85	0.99	4.13	2.82	2.3	1.18	2.96	1.92	4.18
XM_028855456.2	Zc3h10	zinc finger CCCH-type containing 10 (Zc3h10), transcript variant X1, mRNA	8.46	10.45	6.27	7.16	5.24	6.5	8.54	8.31	8.65	12.11	6.31	7.64	3.46	8.85	7.25	6.83	9.5	2.6	1.12	7.01
XM_028855457.2	Zc3h10	zinc finger CCCH-type containing 10 (Zc3h10), transcript variant X2, mRNA	0.71	1.32	0	0.78	0.23	1.46	2.33	1.09	0.76	1.69	3.34	1.81	1.7	2.66	1.28	1.85	2.57	0.39	0	2.68
XM_028855458.2	Ikzf4	IKAROS family zinc finger 4 (Ikzf4), mRNA	1.33	2.25	0.96	0.93	1.05	1.61	1.54	1.03	1.79	2.41	1.91	2.67	2.29	4.78	2.42	0.59	0.65	0.45	0.12	3.67
XM_028855462.2	Rdh5	retinol dehydrogenase 5 (Rdh5), transcript variant X1, mRNA	0.8	0.74	0.73	0.55	0.84	0.85	0.68	0.17	0.67	1.63	0.97	1.04	1.25	1.11	2.32	1.16	0.75	0.28	0.1	0.77
XM_028855463.2	Rdh5	retinol dehydrogenase 5 (Rdh5), transcript variant X2, mRNA	0.84	0.77	0.21	0.38	0.26	0.36	0.98	0.66	0.36	0.79	0.23	0.64	0.56	1.6	1.03	0.47	0.23	0.25	0	0.52
XM_028855465.2	Bloc1s1	biogenesis of lysosomal organelles complex 1 subunit 1 (Bloc1s1), mRNA	34.14	49.94	24.97	27.32	28.46	38.98	41.53	36.49	31.43	53.98	30.34	23.51	15.37	44.86	31.79	49.66	34.76	12.71	3.37	30.73
XM_028855466.1	LOC114681768	olfactory receptor 6C68 (LOC114681768), mRNA	0	0	0	0	0	0	0	0	0	0	0	0	0	0	0	0	0	0	0	0
XM_028855467.1	LOC114681769	olfactory receptor 6C2-like (LOC114681769), mRNA	0	0	0	0	0	0	0	0	0	0	0	0	0	0	0	0	0	0	0	0
XM_028855468.2	Tmf1	TATA element modulatory factor 1 (Tmf1), mRNA	9.5	15.64	10.65	7.67	11.83	10.42	10.57	6.43	8.94	16.2	7.97	11.17	7.45	15.76	15.37	7.84	11.02	1.55	1.13	12.8
XM_028855469.2	Dgka	diacylglycerol kinase alpha (Dgka), transcript variant X3, mRNA	24.21	36.84	15.91	14.53	18.15	18.26	28.22	16.42	20.6	29.91	15.24	10.82	13.59	23.72	19.92	6.88	7.05	4.48	3.39	12.09
XM_028855470.2	Dgka	diacylglycerol kinase alpha (Dgka), transcript variant X4, mRNA	26.11	15.87	8.82	12.91	5.05	7.48	13.55	13.13	11.71	34.56	7.86	2.42	3.5	13.49	9.83	1.09	1.32	6.02	1.41	3.46
XM_028855471.2	Apof	apolipoprotein F (Apof), mRNA	0	0.02	0	0	0.2	0	0	0.19	0	0.08	0.05	0	0.07	0.09	0.22	0.05	0	0.1	0	0.04
XM_028855478.2	Suox	sulfite oxidase (Suox), transcript variant X2, mRNA	0	3.21	2	2.23	2.63	1.17	2.67	1.94	2.22	5.32	1.2	0.28	2.01	1.14	1.36	1.73	0.87	0	0	4.36
XM_028855479.2	Suox	sulfite oxidase (Suox), transcript variant X3, mRNA	2.11	0	0	0.35	0.28	0.9	0.65	0.04	0	0	1.38	0.49	0	0.94	0	0	0	0.58	0.08	0
XM_028855480.2	Apof	apolipoprotein F-like (LOC114681775), transcript variant X1, mRNA	0.12	0.2	0	0	0	0	0	0.66	0.25	0	0	0.07	0	0.35	0	0.13	0.03	0	0	0.23
XM_028855482.2	Apof	apolipoprotein F-like (LOC114681776), mRNA	0.13	0.55	0.42	0.94	0.58	0.27	0.4	0.64	0.86	1.11	0.68	0.05	0.31	0.11	0	0.21	0	0	0.14	0.05
XM_028855483.1	LOC114681777	olfactory receptor 6C3 (LOC114681777), mRNA	0	0	0	0	0	0	0	0	0	0	0	0	0	0	0	0	0	0	0	0
XM_028855484.1	LOC114681778	olfactory receptor 6C2-like (LOC114681778), mRNA	0	0	0	0	0	0	0	0	0	0	0	0	0	0	0	0	0	0	0	0
XM_028855485.2	Cdk2	cyclin dependent kinase 2 (Cdk2), transcript variant X1, mRNA	3.34	4.21	2.17	1.33	1.7	1.84	2.39	0.84	1.8	3.1	0.71	0.15	0.83	2.15	1.81	1.16	0.29	0.77	0.13	1.39
XM_028855486.2	Cdk2	cyclin dependent kinase 2 (Cdk2), transcript variant X2, mRNA	5.21	4.92	3.08	3.78	6.11	3.01	5.42	2.87	3.29	6.28	1.86	1.06	0.99	2.31	5.63	3.67	0.85	0	0.54	3.67
XM_028855487.1	LOC114681780	olfactory receptor 6C3-like (LOC114681780), mRNA	0	0	0	0	0	0	0	0	0	0	0	0	0	0	0	0	0	0	0	0
XM_028855488.1	LOC114681781	olfactory receptor 6C3-like (LOC114681781), mRNA	0	0	0	0	0	0	0	0	0	0	0	0	0	0	0	0	0	0	0	0
XM_028855489.2	Eogt	EGF domain specific O-linked N-acetylglucosamine transferase (Eogt), transcript variant X1, mRNA	1.59	2.46	0.77	1.03	0.92	0.95	1.68	0.93	1.76	1.77	0.5	0.28	0.49	0.71	2.08	0.17	0	0	0	0.14
XM_028855490.1	LOC114681782	olfactory receptor 6C2-like (LOC114681782), mRNA	0	0	0	0	0	0	0	0	0	0	0	0	0	0	0	0	0	0	0	0
XM_028855491.1	LOC114681783	olfactory receptor 6C3-like (LOC114681783), mRNA	0	0	0	0	0	0	0	0	0	0	0	0	0	0	0	0	0	0	0	0
XM_028855492.1	LOC114681784	olfactory receptor 6C2-like (LOC114681784), mRNA	0	0	0	0	0	0.13	0	0	0	0	0	0	0	0	0	0	0	0	0	0
XM_028855493.2	Ppat	phosphoribosyl pyrophosphate amidotransferase (Ppat), mRNA	7.26	11.33	4.97	5.11	6.77	4.99	7.05	4.92	5.93	9.43	6.12	4.82	4.52	10.86	9.61	4.58	7.52	1.3	0.89	5.68
XM_028855494.2	Cd63	CD63 molecule (Cd63), mRNA	50.19	73.66	39.41	51.55	54.79	53.64	63.41	74.94	59.42	101.35	104.35	108.09	77.33	129.42	84.95	276.73	68.35	37.2	11.96	118.2
XM_028855496.1	LOC114681786	olfactory receptor 6C2-like (LOC114681786), mRNA	0	0	0	0	0	0	0	0	0	0	0	0	0	0	0	0	0	0	0	0
XM_028855497.1	LOC114681787	olfactory receptor 6C3-like (LOC114681787), mRNA	0	0	0	0	0	0	0	0	0	0	0	0	0	0	0	0	0	0	0	0
XM_028855498.2	Timeless	timeless circadian regulator (Timeless), mRNA	6.85	8.61	5.73	4.37	4.63	3.41	7.09	5.42	6.68	10.12	3.21	1.47	1.99	3.82	5.8	2.19	2.22	1.23	0.51	2.26
XM_028855499.2	Rps26	ribosomal protein S26 (Rps26), mRNA	666.13	808.61	450.1	523.55	496.15	632.39	876.72	556.44	512.7	868.81	362.69	150.29	180.76	416.77	346.39	334.13	399.82	184.87	70.46	183.68
XM_028855500.1	LOC114681791	olfactory receptor 6C2-like (LOC114681791), mRNA	0	0	0	0	0	0	0	0	0	0	0	0	0	0	0	0	0	0	0	0
XM_028855501.2	Uba3	ubiquitin like modifier activating enzyme 3 (Uba3), transcript variant X1, mRNA	10.2	14.65	10.23	8.07	13.14	10.77	11.78	8.59	8.34	15.54	11.27	14.44	9.55	21.66	16.39	8.48	14.23	3.33	1.41	29.45
XM_028855502.2	LOC114681792	60S ribosomal protein L23-like (LOC114681792), mRNA	0	0	0	0	0	0	0	0	0	0	0	0	0	0	0	0.61	0	0	0	0
XM_028855504.2	Pmel	premelanosome protein (Pmel), mRNA	0.11	0.3	0.23	0.16	0.29	0.03	0.26	0.23	0.44	0.3	0.12	0.18	0.13	0.25	0.26	0.24	0.07	0.03	0.08	0.1
XM_028855506.2	LOC114681796	major intrinsic protein of lens fiber (LOC114681796), mRNA	0.26	0.46	0.39	0.16	0.27	0.47	0.68	0.36	0.47	0.38	0.22	0.1	0.28	0.22	0.16	0.2	0.22	0.02	0.09	0.2
XM_028855507.1	LOC114681797	olfactory receptor 9-like (LOC114681797), mRNA	0	0	0	0	0	0	0	0	0	0	0	0	0	0	0	0	0	0	0	0
XM_028855508.2	Uba3	ubiquitin like modifier activating enzyme 3 (Uba3), transcript variant X2, mRNA	5.88	5.56	2.92	3.38	2.63	4.64	3.58	3.62	3.18	5.78	5.55	4.77	1.71	6.61	6.55	3.62	3.94	0.67	0.18	2.96
XM_028855509.2	LOC114681800	olfactory receptor 6C4-like (LOC114681800), mRNA	0	0	0	0	0	0	0	0	0	0	0	0	0	0	0	0	0	0.03	0	0
XM_028855510.1	LOC114681801	olfactory receptor 6C65-like (LOC114681801), mRNA	0	0	0	0	0	0	0	0	0	0	0	0	0	0	0	0	0	0	0	0
XM_028855511.2	LOC114681802	olfactory receptor 6C4-like (LOC114681802), mRNA	0	0	0	0	0	0	0	0	0	0	0	0	0	0	0	0	0	0	0	0
XM_028855512.1	LOC114681803	olfactory receptor 6C4-like (LOC114681803), mRNA	0	0	0	0	0	0	0	0	0	0	0	0	0	0	0	0	0	0	0	0
XM_028855514.2	Mmp19	matrix metallopeptidase 19 (Mmp19), mRNA	0.32	0.22	0.29	0.22	0.71	0.66	0.51	0.46	0.38	1.19	0.38	1.03	0.65	0.73	1.55	2.3	1.11	0.1	0.2	2.92
XM_028855515.2	Ankrd52	ankyrin repeat domain 52 (Ankrd52), mRNA	4.38	7.25	3.6	3.58	4.5	4.92	5.71	3.06	4.93	8.3	2.49	2.11	2.33	5.26	6.08	3	3.6	0.67	0.53	3.99
XM_028855516.2	Arl6ip5	ADP ribosylation factor like GTPase 6 interacting protein 5 (Arl6ip5), mRNA	46.68	64.12	37.08	37.96	41.08	49.9	60.42	35.71	45.33	75.52	39.31	40.31	23.5	52.61	39.43	32.9	49.41	13.98	5.19	36.79
XM_028855517.2	Slc39a5	solute carrier family 39 member 5 (Slc39a5), transcript variant X2, mRNA	0.65	0.53	0.15	0.52	0.29	0.19	0.45	0	1.04	0.5	0.39	0.24	0.75	0.24	1.08	0.25	0	0.2	0	0.07
XM_028855518.1	Rnf41	ring finger protein 41 (Rnf41), transcript variant X1, mRNA	3.01	3.43	3.68	4.12	3.86	8.56	3.43	1.7	3.74	5.95	7.79	21.17	10.13	20.17	13.64	13.78	16.28	4.39	1.02	24.58
XM_028855520.2	Rnf41	ring finger protein 41 (Rnf41), transcript variant X2, mRNA	5.31	5.01	2.75	3.18	3.58	2.95	4.75	5.52	3.52	6.22	1.97	1.7	1.44	3.85	1.95	0.71	1.93	0.88	0.35	4.11
XM_028855521.2	Rnf41	ring finger protein 41 (Rnf41), transcript variant X3, mRNA	1.7	2.38	1.3	0.72	1.16	0.96	0.66	0.5	0.82	2.64	3.54	5.52	2.04	8.37	2.08	1.87	1.06	0.28	0.29	4.26
XM_028855522.1	Rnf41	ring finger protein 41 (Rnf41), transcript variant X4, mRNA	0.53	1.12	0.44	0.29	0.76	0.51	1.82	1.24	1.27	1.55	2.1	1.06	0.61	1.86	0.69	1.31	2.31	0.14	0.08	4.22
XM_028855523.2	Rnf41	ring finger protein 41 (Rnf41), transcript variant X5, mRNA	0.5	1.29	0.8	0.92	0.7	1.15	2.53	0.76	1.18	3.05	1.37	2.55	1.34	2.62	0.98	1.27	2.68	0.69	0.28	3.73
XM_028855524.2	Rnf41	ring finger protein 41 (Rnf41), transcript variant X6, mRNA	0.26	1.89	0.93	0.32	0.82	2.6	0.81	2.31	1.34	2.73	2.7	3.51	2.54	7.01	0.76	1.7	1.92	0.34	0.31	5.38
XM_028855525.2	Nabp2	nucleic acid binding protein 2 (Nabp2), transcript variant X1, mRNA	0	0	0.19	1.96	0.36	0.4	0.17	0.67	0	0.55	1.05	0	0	1.32	0.44	0	0	0	0	0.31
XM_028855526.2	Nabp2	nucleic acid binding protein 2 (Nabp2), transcript variant X3, mRNA	1.17	1.34	0.41	0	0.34	0.43	1.16	0.62	1.32	1.32	0.32	0.84	0.53	0.66	1.65	0.25	0.15	0.66	0	0.96
XM_028855527.2	Nabp2	nucleic acid binding protein 2 (Nabp2), transcript variant X2, mRNA	4.89	1.97	4.33	2.48	1.39	2.54	3.33	4.53	4.15	4.29	0	1.95	1.64	2.79	2.83	0	0.92	0.9	0	0.83
XM_028855529.2	Nabp2	nucleic acid binding protein 2 (Nabp2), transcript variant X4, mRNA	8.76	12.01	5.65	6.82	8.29	13.21	14.95	6.23	9.93	15.89	9.57	4.81	4.51	10.01	5.27	12.06	12.87	3.06	1.83	8.17
XM_028855530.2	Lmod3	leiomodin 3 (Lmod3), mRNA	0.02	0	0.07	0	0.03	0	0.04	0	0	0.05	0.13	0.02	0.11	0.03	0	0	0.08	0	0	0.02
XM_028855531.1	LOC114681813	olfactory receptor 2AP1 (LOC114681813), mRNA	0	0	0	0	0	0	0	0	0	0	0	0	0	0	0	0	0	0	0	0
XM_028855532.2	LOC114681814	SAP domain containing ribonucleoprotein (LOC114681814), transcript variant X1, mRNA	42.42	44.66	30.17	24.45	29.58	37.5	38.09	28.63	29.09	41.27	25.57	27.31	21.22	47.15	40.38	28.22	42.43	10.61	4.5	23.44
XM_028855536.2	Pus7	pseudouridine synthase 7 (Pus7), transcript variant X1, mRNA	0.44	0	0.17	0.69	0	0	0.16	0.32	0	0	0.04	0	0	0	0.12	0	0.87	0	0	0
XM_028855538.2	Pus7	pseudouridine synthase 7 (Pus7), transcript variant X3, mRNA	0	0	0	0	0	0	0	0	0	0	0	0	0	0	0	0	0	0	0	0
XM_028855539.2	Pus7	pseudouridine synthase 7 (Pus7), transcript variant X4, mRNA	0	0	0	0	0	0	0	0	0	0	0	0	0	0	0	0	0	0	0	0
XM_028855540.2	Pus7	pseudouridine synthase 7 (Pus7), transcript variant X5, mRNA	4	8	3.05	4.17	4.29	4.12	4.21	2.96	4.31	6.65	2.45	1.45	0.67	4.46	2.91	5.88	8.91	0.44	0.73	2.5
XM_028855543.2	Srpk2	SRSF protein kinase 2 (Srpk2), transcript variant X8, mRNA	0	0	0	0	0	3	0.02	0	1.82	0	12.62	6.7	0.96	18.64	0.26	0.62	0	0.05	0	0
XM_028855545.2	Srpk2	SRSF protein kinase 2 (Srpk2), transcript variant X11, mRNA	3.78	3.56	3.39	6.06	1.31	6.44	9.3	3.29	4.25	20.31	0.09	5.01	8.78	0	2.74	1.83	4.3	1.8	0.08	0
XM_028855547.2	Frmd4b	FERM domain containing 4B (Frmd4b), transcript variant X1, mRNA	0	0	0	0	0	0	0	0	0	0	0	0	0	0	0	0	0	0	0	0
XM_028855550.2	Hs3st5	heparan sulfate-glucosamine 3-sulfotransferase 5 (Hs3st5), transcript variant X2, mRNA	0	0	0.02	0	0.02	0	0	0	0	0	0	0	0	0	0.02	0	0	0	0	0
XM_028855555.2	LOC114681832	protein NDRG3-like (LOC114681832), mRNA	0.69	1.51	0.43	0.46	0.21	0.85	1.88	0.7	0.1	1.38	0.45	0.17	0.26	0.56	0.02	0.27	0.16	0.07	0	0
XM_028855557.2	Cnbd2	cyclic nucleotide binding domain containing 2 (Cnbd2), transcript variant X3, mRNA	0	0	0	0	0	0	0	0	0	0	0	0	0	0	0	0	0	0	0	0
XM_028855558.1	Src	SRC proto-oncogene, non-receptor tyrosine kinase (Src), transcript variant X1, mRNA	0	0	0	0	0	0	0	0	0	0	0	0	0	0	0	0	0	0	0	0
XM_028855559.2	Src	SRC proto-oncogene, non-receptor tyrosine kinase (Src), transcript variant X2, mRNA	0.08	0.69	0	0.62	0.24	0.46	0.56	0.24	0.48	0.58	0	0.21	0.36	0.39	0	0.37	0.15	0	0.27	0.38
XM_028855561.1	Src	SRC proto-oncogene, non-receptor tyrosine kinase (Src), transcript variant X4, mRNA	0.94	0.46	0.56	0.79	1.3	0.86	0.39	0.35	2.06	1.27	0.14	0	1.6	0.77	0	0.61	0	0	0.2	1.38
XM_028855564.2	Frmd4b	FERM domain containing 4B (Frmd4b), transcript variant X2, mRNA	0	1.46	0.73	1.05	0.22	0.71	1.7	0.47	1.95	0.66	1.31	2.81	1.38	1.39	1.9	5	9	0.68	0.47	1.71
XM_028855565.1	Src	SRC proto-oncogene, non-receptor tyrosine kinase (Src), transcript variant X8, mRNA	0	0	0.16	0	0.18	0	0	0	0	0	0	0	0	0.04	0	0	0	0	0	0
XM_028855566.1	Src	SRC proto-oncogene, non-receptor tyrosine kinase (Src), transcript variant X9, mRNA	2.05	4.12	2.42	2.01	2.46	2.43	6.57	2.91	3.04	4	1.62	1.88	1.78	2.46	1.43	3.44	0.35	1.41	1.01	2.75
XM_028855567.2	Ghrh	growth hormone releasing hormone (Ghrh), mRNA	0	0	0	0	0	0	0	0	0	0	0	0	0	0	0	0	0	0	0	0
XM_028855569.2	Sla2	Src like adaptor 2 (Sla2), transcript variant X1, mRNA	5.69	8.36	3.05	5.3	3.91	3.42	6.37	4.45	3.91	11.52	3.19	1.34	1.68	4.5	6.24	1.64	0.74	0.85	0.64	1.17
XM_028855571.2	Tgif2	TGFB induced factor homeobox 2 (Tgif2), transcript variant X1, mRNA	0	1.52	0	0	1.09	0	0	0.03	0.69	0.98	0	0	0	2.06	0.53	0.35	0	0	0	0
XM_028855572.2	Rab5if	RAB5 interacting factor (Rab5if), mRNA	41.73	36.45	26.99	33.75	28.92	44.42	36.22	37.19	28.37	55.26	51.98	54.15	27.65	67.37	38.51	29.33	33.18	13.92	4.35	60.08
XM_028855573.2	Frmd4b	FERM domain containing 4B (Frmd4b), transcript variant X7, mRNA	0	0	0	0	0.03	0.03	0	0	0	0.03	0.02	0	0	0	0.05	0.02	0.13	0	0	0
XM_028855574.2	Rbl1	RB transcriptional corepressor like 1 (Rbl1), mRNA	2.43	4.47	2.61	2.11	2.95	2.48	3.33	2.69	2.29	4.34	2.82	2.7	2.49	5.57	5.14	2.79	2.54	0.85	0.53	4.14
XM_028855578.2	Aar2	AAR2 splicing factor (Aar2), transcript variant X1, mRNA	1.75	1.93	1.08	0.77	1.15	0.75	1.14	0.94	1.19	1.79	0.59	1.84	0.62	1.54	0.78	1.48	0.78	0.36	0.22	0.51
XM_028855579.2	Aar2	AAR2 splicing factor (Aar2), transcript variant X2, mRNA	0.54	1.21	0.13	0.65	0.11	0.82	0.53	0	0.58	0.4	0.59	0	0.22	0.33	0.4	0.43	1.17	0.00893	0	0.27
XM_028855580.1	Frmd4b	FERM domain containing 4B (Frmd4b), transcript variant X8, mRNA	1.29	0	0.46	0.41	0.6	0.63	0.69	0.68	0	2.64	0	0	0	0	0	0	0	0	0	0
XM_028855581.2	Aar2	AAR2 splicing factor (Aar2), transcript variant X4, mRNA	1.82	4.64	1.36	0.78	1.49	3.63	2.44	2.29	2.96	3.14	1.89	1.76	1.82	2.8	2.99	2.66	3.89	0.64	0.18	3.51
XM_028855582.2	Epb41l1	erythrocyte membrane protein band 4.1 like 1 (Epb41l1), transcript variant X1, mRNA	0	0	0	0	0	0	0	0	0	0	0	0	0	0	0	0	0	0	0	0
XM_028855586.2	Epb41l1	erythrocyte membrane protein band 4.1 like 1 (Epb41l1), transcript variant X8, mRNA	0	0	0	0	0	0	0	0	0	0	0	0	0	0	0	0	0	0	0	0
XM_028855593.2	Epb41l1	erythrocyte membrane protein band 4.1 like 1 (Epb41l1), transcript variant X12, mRNA	0	0	0	0	0	0	0	0	0	0	0.02	0	0.01	0.02	0	0.48	0.1	0.04	0	0.12
XM_028855596.2	Samhd1	SAM and HD domain containing deoxynucleoside triphosphate triphosphohydrolase 1 (Samhd1), mRNA	72.57	125.88	95.85	85.31	78.44	167.43	144.34	124.94	74.79	286.47	383.63	612.7	349.35	862.73	338.95	121.58	289.82	64.05	42.4	609.11
XM_028855597.2	Manbal	mannosidase beta like (Manbal), mRNA	20.54	30.98	21.23	19.22	16.04	29.36	29.93	24.59	27.61	37.58	24.52	22.69	15	38.29	17.48	20.98	32.98	6.53	3.83	30.78
XM_028855598.2	Dlgap4	DLG associated protein 4 (Dlgap4), transcript variant X1, mRNA	0	0	0	0	0	0	0	0	0	0	0	0	0	0	0	0	0	0	0	0
XM_028855600.2	Dlgap4	DLG associated protein 4 (Dlgap4), transcript variant X3, mRNA	0.39	0.75	0.3	0.33	0.31	0.47	0.37	0.26	0.41	0.4	0.19	0.21	0.2	0.65	0.79	0.15	0.22	0.07	0.00588	0.35
XM_028855602.2	Dlgap4	DLG associated protein 4 (Dlgap4), transcript variant X4, mRNA	0.94	2.8	1.71	1.56	1.41	1.72	3.03	1.83	2.66	3.68	0.87	1.34	1.87	1.45	0.58	1.16	1.16	0.6	0.53	4.25
XM_028855603.1	Dlgap4	DLG associated protein 4 (Dlgap4), transcript variant X5, mRNA	11.95	14.68	6.96	8.73	8.36	10.25	14.59	7.84	12.05	17.01	10.37	8.01	5.63	13.83	8.43	8.81	10.05	2.88	1.97	9.25
XM_028855604.2	Paics	phosphoribosylaminoimidazole carboxylase and phosphoribosylaminoimidazolesuccinocarboxamide synthase (Paics), transcript variant X2, mRNA	5.24	4.34	3.27	5.39	2.41	2.18	2.03	2.32	2.93	4.78	2.47	1.92	1.63	2.86	4.63	5.44	6.92	1.98	1.22	1.09
XM_028855605.2	Myl9	myosin light chain 9 (Myl9), transcript variant X1, mRNA	501.1	803.66	441.89	579.1	402.82	454.24	1709.31	625.03	1113.91	810.03	160.64	574.25	643.59	532.4	29.95	451.77	59.04	495.2	285.05	330.12
XM_028855606.2	Myl9	myosin light chain 9 (Myl9), transcript variant X2, mRNA	23.53	36.82	26.05	23.9	28.1	33.28	94.84	35.38	60.42	41.89	7.2	27.91	37.82	27.88	1.12	23.26	3.4	23.57	22.35	13.84
XM_028855607.2	LOC114681853	protein NDRG3 (LOC114681853), transcript variant X1, mRNA	0.89	1.02	0.44	0.26	0.32	0	0.7	1.41	0	0.93	0.51	0	0.35	0.38	0.2	0.22	0	0	0	0.35
XM_028855608.2	LOC114681850	gastrokine-3-like (LOC114681850), mRNA	0	0	0	0	0	0	0	0	0	0	0	0	0	0	0	0	0	0	0	0
XM_028855609.2	LOC114681853	protein NDRG3 (LOC114681853), transcript variant X2, mRNA	0.02	0	0	0	0	0	0	0	0	0.02	0	0	0	0	0	0	0	0	0	0
XM_028855610.2	LOC114681853	protein NDRG3 (LOC114681853), transcript variant X3, mRNA	13.96	18.68	10.73	10.12	12.26	14.5	16.24	6.42	13.13	19.47	5.49	3.05	3.65	8.84	7.16	3.37	5.11	2.16	1.28	5.05
XM_028855611.2	LOC114681853	protein NDRG3 (LOC114681853), transcript variant X5, mRNA	0.25	0	0	0	0	0	0.14	0	0	0.6	0	0.29	0	0	0.18	0.55	0.54	0	0	0
XM_028855613.2	Tldc2	TBC/LysM-associated domain containing 2 (Tldc2), mRNA	0	0.09	0.28	0.02	0.02	0.08	0.18	0.42	0	0.19	0.21	0.47	0.07	1.75	0.25	0.09	0.22	0.07	0	0.54
XM_028855615.2	Nnat	neuronatin (Nnat), transcript variant X1, mRNA	0.73	0.6	0.58	0.08	0.67	0.6	0.17	0.35	0.53	0.84	0.49	0.26	0.27	0.24	0.45	0.14	0.27	0	0	0.2
XM_028855616.2	Nnat	neuronatin (Nnat), transcript variant X2, mRNA	0	0	0.5	0.72	0	0	0	0	0	0	0	0	0	0	0	0	0	0	0.13	0
XM_028855617.2	Nnat	neuronatin (Nnat), transcript variant X3, mRNA	0.75	0.31	0	0	0.67	0.53	0.5	0.22	0.29	0.86	0.2	0.89	0.56	1.07	0.32	0.26	0	0	0	0.32
XM_028855618.2	Nnat	neuronatin (Nnat), transcript variant X4, mRNA	0	2.02	0.42	0.79	0.64	0.51	1.66	0.14	1.07	1.34	0	0.7	0.21	0.7	0.68	1.14	0.22	0.35	0.14	0.97
XM_028855619.2	LOC114681858	BLCAP apoptosis inducing factor (LOC114681858), transcript variant X1, mRNA	9.58	10.57	6.51	6.5	7.31	6.71	9.29	5.08	6.14	10.39	6.02	5.32	3.81	7.99	6.74	5.95	7.51	2.06	0.77	8.39
XM_028855620.2	Soga1	suppressor of glucose, autophagy associated 1 (Soga1), mRNA	0.29	0.77	0.57	0.79	1.01	0.78	0.62	0.33	0.76	1.66	0.48	0.24	0.19	0.76	0.57	1.04	1.19	0.07	0.05	0.95
XM_028855622.2	Mroh8	maestro heat like repeat family member 8 (Mroh8), transcript variant X1, mRNA	0.36	0.47	0.38	0.67	0.04	0	0.23	0	0.17	0.88	0	0.21	0.12	0.11	0.32	0	0.21	0.21	0	0
XM_028855623.2	Mroh8	maestro heat like repeat family member 8 (Mroh8), transcript variant X5, mRNA	0.4	0.89	0.21	0.02	0.31	0	0.6	0.3	0	0.47	0.12	0.02	0	0.13	0.07	0	0	0.04	0.13	0.07
XM_028855624.2	Rpn2	ribophorin II (Rpn2), transcript variant X1, mRNA	0.1	0.48	0.21	0.04	0.5	0.38	0.41	0.14	0.78	0.68	0.19	0.16	0.22	0.94	0.96	0.66	1.95	0	0.09	0.48
XM_028855626.2	Rpn2	ribophorin II (Rpn2), transcript variant X2, mRNA	32.29	52.2	34.9	35.21	39.15	40.68	43.74	37.15	52.87	75.58	29.88	28.4	19.37	48.55	31.77	56.98	73.53	8.88	8.1	47.3
XM_028855629.2	Ofcc1	orofacial cleft 1 candidate 1 (Ofcc1), mRNA	0	0	0	0	0	0	0	0	0	0	0	0	0	0	0	0	0	0	0	0
XM_028855630.2	Tfap2a	transcription factor AP-2 alpha (Tfap2a), transcript variant X2, mRNA	0	0	0	0	0	0	0	0	0	0	0	0	0.00916	0	0	0	0	0	0	0
XM_028855631.2	Tfap2a	transcription factor AP-2 alpha (Tfap2a), transcript variant X3, mRNA	0	0	0	0	0	0	0	0	0	0	0	0	0	0	0	0	0	0	0.02	0
XM_028855632.2	Tfap2a	transcription factor AP-2 alpha (Tfap2a), transcript variant X4, mRNA	0	0.00846	0	0	0	0.05	0	0	0	0.00685	0	0	0	0	0	0.02	0.03	0	0	0
XM_028855633.2	Acad10	acyl-CoA dehydrogenase family member 10 (Acad10), transcript variant X1, mRNA	0.42	1.34	0.91	0.83	0.19	0	0.19	0.53	0	2.04	0	0.31	0	0.83	0	0.28	0	0	0	0.57
XM_028855634.1	Acad10	acyl-CoA dehydrogenase family member 10 (Acad10), transcript variant X4, mRNA	0.22	0.43	0	0.16	0.37	0.47	0.34	0	0.24	0	0	0	0	0	1.06	0	0	0	0	0.15
XM_028855635.2	Acad10	acyl-CoA dehydrogenase family member 10 (Acad10), transcript variant X3, mRNA	0	0	0	0	0	0	0	0	0	0	0	0	0	0	0	0	0	0	0	0
XM_028855636.2	Acad10	acyl-CoA dehydrogenase family member 10 (Acad10), transcript variant X2, mRNA	0.78	0.49	0	0	0.66	1.26	1.24	0.44	1.12	0.54	0.57	0.01	0.31	0.28	0.15	0	0.26	0.22	0.1	0.25
XM_028855637.2	Acad10	acyl-CoA dehydrogenase family member 10 (Acad10), transcript variant X5, mRNA	0.07	0	0	0.11	0	0	0.07	0	0	0.1	0	0.14	0	0	0	0	0	0	0	0
XM_028855638.2	LOC114681882	BRCA1 associated protein (LOC114681882), transcript variant X1, mRNA	14.88	18.52	9.9	14.29	12.44	17.45	18.89	11.89	12.98	25.37	15.13	12.06	8.9	23.32	13.55	11.79	12.17	4.4	1.95	19.43
XM_028855639.2	Naa25	N-alpha-acetyltransferase 25, NatB auxiliary subunit (Naa25), transcript variant X1, mRNA	5.53	8.63	4.85	4.09	4.42	4.29	5.18	3.25	5.31	10.17	3.59	2.7	2.23	7.15	5.1	4.16	6.83	0.08	0.76	1.69
XM_028855640.2	Rph3a	rabphilin 3A (Rph3a), transcript variant X1, mRNA	0.07	0.16	0.09	0.07	0.1	0.04	0.04	0.04	0.02	0.08	0.23	0.17	0.05	0.26	0.12	0.04	0.07	0.03	0.02	0.18
XM_028855641.2	Rph3a	rabphilin 3A (Rph3a), transcript variant X2, mRNA	0.56	1.62	1.14	1.1	1.25	0.56	0.83	0.55	0.9	1.15	2.05	2.12	1.6	2.61	2.24	0.45	0.85	0.23	0.21	1.66
XM_028855643.2	Cux2	cut like homeobox 2 (Cux2), transcript variant X3, mRNA	0	0	0	0	0.05	0	0	0.11	0	0	0	0.03	0	0	0	0	0.02	0	0	0
XM_028855644.2	LOC114681885	vomeronasal type-1 receptor 90-like (LOC114681885), mRNA	0	0	0	0	0	0	0	0	0	0	0	0	0	0	0	0	0	0	0	0
XM_028855645.2	Trafd1	TRAF-type zinc finger domain containing 1 (Trafd1), transcript variant X1, mRNA	13.94	17.32	16.19	10.84	8.6	16.4	9.48	12.98	11.72	36.93	9.51	8.96	5.78	25.52	4.79	9.22	21.04	6.14	1.81	5.15
XM_028855646.2	Trafd1	TRAF-type zinc finger domain containing 1 (Trafd1), transcript variant X2, mRNA	5.77	7.07	0.47	5.61	6.7	9.14	14.98	1.56	4.79	1.79	4.76	0.69	0.62	1.28	11.73	6.13	17.95	0	0.22	9.48
XM_028855647.2	Mapkapk5	MAPK activated protein kinase 5 (Mapkapk5), transcript variant X1, mRNA	2.37	3.32	2.65	0.81	1.94	1.69	4.3	3.75	3.14	2.87	1.44	4.51	0.85	5.71	5.23	2.56	3.96	0.78	0.1	7.8
XM_028855648.2	Mapkapk5	MAPK activated protein kinase 5 (Mapkapk5), transcript variant X2, mRNA	4.52	4.7	1.59	2.73	3.23	4.26	4.17	3.07	2.96	5.66	3.82	5.11	3.46	3.29	2.55	2	5.58	2.79	0.34	1.69
XM_028855649.2	Mapkapk5	MAPK activated protein kinase 5 (Mapkapk5), transcript variant X3, mRNA	0.94	0.85	0	0.78	0.5	0.37	0.49	0	0	1.37	0	0.32	0.52	0	0	1.76	0.15	0.17	0	0
XM_028855650.2	Mapkapk5	MAPK activated protein kinase 5 (Mapkapk5), transcript variant X4, mRNA	7.65	8.84	6.04	7.64	5.5	7.66	9.51	7.85	7.52	11.73	6.98	5.81	4.25	12.32	5.65	9.06	11.55	0.19	1.8	6.48
XM_028855651.1	Hectd4	HECT domain E3 ubiquitin protein ligase 4 (Hectd4), transcript variant X4, mRNA	0	0	0	0	0	0	0	0	0	0	0	0	0	0	0.00439	0	0	0	0.08	0
XM_028855654.1	Hectd4	HECT domain E3 ubiquitin protein ligase 4 (Hectd4), transcript variant X6, mRNA	0.77	1.72	1.34	0.93	1.95	0.71	0.53	0.14	1.13	3.65	1.8	1.22	0.55	1.54	1.98	2.79	0.32	0	0.48	0.07
XM_028855655.1	Hectd4	HECT domain E3 ubiquitin protein ligase 4 (Hectd4), transcript variant X7, mRNA	1.8	3.37	1.91	1.96	1.68	2.42	2.18	1.1	1.63	1.96	0.13	0.87	1.3	1.49	1.23	0.00384	1.13	0.84	0	2.66
XM_028855656.2	Aldh2	aldehyde dehydrogenase 2 family member (Aldh2), mRNA	25.71	37.23	20.3	31.48	31.91	56.43	68.71	28.32	42.27	31.86	33.55	42.06	22.16	52.79	26.26	63.95	77.61	10.76	11.69	92.4
XM_028855657.1	LOC114681890	vomeronasal type-1 receptor 98-like (LOC114681890), mRNA	0	0	0	0	0	0	0	0	0	0	0	0	0	0	0	0	0	0	0	0
XM_028855658.2	Erp29	endoplasmic reticulum protein 29 (Erp29), mRNA	42.07	44.13	45.05	30.79	43.74	45.02	61.12	35.18	43.69	71.46	28.99	17.01	13.03	39.9	30.97	25.63	32.67	14.36	4.24	31.85
XM_028855660.2	Atxn2	ataxin 2 (Atxn2), mRNA	4.89	6.44	3.59	3.84	4.11	4.47	5.77	3.84	4.73	7.99	3.81	3.37	2.97	6.28	6.13	4.18	3.93	0.73	0.56	5.98
XM_028855662.2	Oas1a	2'-5'-oligoadenylate synthase 1A-like (LOC114681897), mRNA	15.45	16.99	12.77	20.2	5.66	46.48	40.46	26.75	5.24	33.38	55.29	34.11	6.42	54.07	86.17	14.52	57.97	15.02	5.47	50.82
XM_028855663.2	Rpl6	ribosomal protein L6 (Rpl6), mRNA	787.63	921.83	474.56	511.41	526.37	610.85	775.54	525.96	554.74	826.38	361.7	184.76	181.99	462.55	376.71	371.48	558.45	165.63	67.03	179.57
XM_028855664.2	LOC114681901	disintegrin and metalloproteinase domain-containing protein 1a-like (LOC114681901), mRNA	7.81	7.62	5.73	4.98	4.55	7.04	7.21	5.91	6	11.69	7.31	6.81	6.4	12.91	7.2	2.45	2.67	1.89	0.78	8.34
XM_028855665.2	Pheta1	PH domain containing endocytic trafficking adaptor 1 (Pheta1), mRNA	0.2	0.2	0.13	0.29	0.46	0.58	0.52	0.22	0	0.52	0.29	0	0.08	0.15	0.09	0.37	0.18	0.06	0.03	0.02
XM_028855666.1	LOC114681899	vomeronasal type-1 receptor 54-like (LOC114681899), mRNA	0	0	0	0	0	0	0	0	0	0	0	0	0	0	0	0	0	0	0	0
XM_028855669.2	Ptpn11	protein tyrosine phosphatase non-receptor type 11 (Ptpn11), mRNA	14.09	22.43	11.78	13.03	13.86	16.16	19.11	10.57	16.05	23.3	11.3	14.93	9.64	19	14.24	19.42	20.44	3.45	2.99	21.37
XM_028855671.2	LOC114681910	disintegrin and metalloproteinase domain-containing protein 1b-like (LOC114681910), mRNA	0.07	0.08	0.05	0.09	0.04	0.07	0.14	0.05	0.05	0.12	0.06	0.08	0.04	0.08	0.05	0.04	0.07	0.03	0.01	0.05
XM_028855676.2	Septin8	septin 8 (Septin8), transcript variant X1, mRNA	0.33	0.68	0.22	0.13	0.48	0.67	0.42	0.33	0.15	0.78	0.23	0.06	0.14	0.53	0.56	0.46	0.28	0	0.00946	0.41
XM_028855677.2	Septin8	septin 8 (Septin8), transcript variant X2, mRNA	1.49	2.48	1.03	2.06	2.32	1.56	1.96	1.48	1.37	3.73	1.22	0.37	0.54	1.75	2.56	4.37	2.59	0.26	0.31	1.33
XM_028855678.2	Septin8	septin 8 (Septin8), transcript variant X3, mRNA	0.57	0.7	0	0.31	0.67	0.48	0.52	0.28	0.06	0.64	0.04	0.54	0.18	0.26	0.24	0.42	0.62	0.18	0	0.47
XM_028855679.2	Septin8	septin 8 (Septin8), transcript variant X4, mRNA	0.31	1.38	0.84	0.42	0.55	0.57	0.51	0.21	0.29	1.39	0.52	0	0	0.07	0.39	1.47	0.73	0	0	0.38
XM_028855680.2	Septin8	septin 8 (Septin8), transcript variant X5, mRNA	1.29	1.41	0.83	0.86	1.6	1.54	1.4	0.43	1.23	2.08	0.42	0.4	0.42	1.04	1.36	2.63	1.19	0.15	0.22	1.41
XM_028855681.1	Fstl4	follistatin like 4 (Fstl4), mRNA	0.00537	0.04	0.05	0.00666	0	0.00832	0.01	0	0	0.00616	0	0.07	0.02	0.05	0.04	0.00729	0.01	0	0.03	0.04
XM_028855682.1	Vdac1	voltage dependent anion channel 1 (Vdac1), transcript variant X1, mRNA	6.44	13.4	14.97	8.75	21.78	11.72	11.68	7.7	7.75	22.75	7.54	7.46	5.75	10.2	12.17	9.85	14.79	3.5	1.29	10.3
XM_028855683.2	Vdac1	voltage dependent anion channel 1 (Vdac1), transcript variant X2, mRNA	6.42	8.65	3.38	3.38	4.36	5.79	5.19	3.59	3.3	7.85	2.21	0.06	0.45	3.77	6.52	7.64	2.85	1.59	0.44	2.42
XM_028855684.2	C8BH5orf15	chromosome 8b C5orf15 homolog (C8BH5orf15), mRNA	23.97	33.79	21.82	18.98	27.48	31.24	27.14	26.39	17.76	44.2	25.84	36.69	17.98	40.97	28.15	27.61	37.98	5.87	3.38	57.06
XM_028855685.2	Sowaha	sosondowah ankyrin repeat domain family member A (Sowaha), mRNA	0.05	0.15	0.41	0.31	0.8	0.49	0.07	0.06	0.24	0.5	0.17	0.17	0.23	0.14	0.46	1.5	0.3	0	0.35	0.83
XM_028855686.2	Aff4	AF4/FMR2 family member 4 (Aff4), transcript variant X1, mRNA	6.3	12.76	7.72	5.4	6.98	8.1	7.94	3.96	6.8	11.37	5.62	7.74	4.94	11.13	8.96	3.71	7.02	0.94	0.94	11.01
XM_028855687.2	Aff4	AF4/FMR2 family member 4 (Aff4), transcript variant X2, mRNA	0	0.67	0.32	0	0.56	0	0	0	0.75	0.35	0	0.4	0	0.71	0	0.91	0	0	0	2.08
XM_028855688.2	Aff4	AF4/FMR2 family member 4 (Aff4), transcript variant X3, mRNA	1.01	0.14	0.24	0.45	1.16	0	0	0.68	0	0.83	0.71	0.41	0.52	0.67	0	0.59	0	0	0	0.41
XM_028855689.2	Il4	interleukin 4 (Il4), mRNA	0	0	0	0.08	0.41	0.1	0	0	0	0.07	0.3	2.36	2.43	0.08	1.31	0.18	0.09	1.53	0	0.23
XM_028855690.2	Zcchc10	zinc finger CCHC-type containing 10 (Zcchc10), mRNA	3.92	6.03	3.24	3.12	2.93	4.65	4.31	3.12	3.47	7.02	3.55	3.76	1.71	4.49	4.32	3.49	5.61	1.22	0.78	3.81
XM_028855691.2	LOC114681926	cytochrome b-c1 complex subunit 8 (LOC114681926), mRNA	37.25	50.29	35.59	36.35	42.75	40.45	45.55	30.69	35.85	47.7	34.93	19.05	20.45	33.18	37.79	41.7	50.79	24.14	12.06	22.07
XM_028855692.2	Shroom1	shroom family member 1 (Shroom1), transcript variant X2, mRNA	1.11	1.59	0.66	0.68	1.1	1.09	1.06	1.09	1.01	1.74	1.33	1.03	1.03	2.08	2.21	0.56	0.72	0.23	0.02	1.06
XM_028855694.2	Leap2	liver enriched antimicrobial peptide 2 (Leap2), mRNA	0.03	0	0.03	0	0.04	0.04	0.06	0	0.08	0.03	0.04	0	0.04	0.03	0.12	0.07	0.02	0.22	0	0.08
XM_028855695.2	Gdf9	growth differentiation factor 9 (Gdf9), mRNA	0	0	0.03	0	0	0	0	0	0	0	0	0	0.04	0	0	0.03	0	0	0	0
XM_028855696.2	Hspa4	heat shock protein family A (Hsp70) member 4 (Hspa4), mRNA	25.71	34.98	21.27	17	23	20.87	27.17	14.52	20.84	34.22	17.89	17.05	11.8	25.79	24.46	22.05	29.87	5.69	2.92	23.44
XM_028855697.2	Kif3a	kinesin family member 3A (Kif3a), mRNA	1.03	1.42	1.33	1.37	1.66	1.47	1.86	0.69	1.3	2.38	1.5	0.96	0.87	1.08	1.59	1.58	1.07	0.11	0.24	1.17
XM_028855698.2	Ube2n	ubiquitin conjugating enzyme E2 N (Ube2n), transcript variant X2, mRNA	46.06	54.39	41.26	30.11	40.87	42.42	45.34	33.14	33.95	57.25	37.43	42.96	25.01	55.3	52.93	45.85	60.15	13.38	5.5	60.31
XM_028855699.1	Nudt4	nudix hydrolase 4 (Nudt4), transcript variant X1, mRNA	34.46	32.01	28.13	29.14	41.74	34.52	35.19	37.68	25.16	55.9	34.54	27.64	18.11	43.52	25.8	12.49	10.25	5.86	3.51	47.03
XM_028855700.1	Nudt4	nudix hydrolase 4 (Nudt4), transcript variant X2, mRNA	40.05	33.87	30.31	39.44	46.32	34.42	39.38	39.33	28.49	54.84	35.59	35.52	24.49	50.75	25.01	17.91	12.37	7.94	4.04	52.44
XM_028855701.2	Aasdh	aminoadipate-semialdehyde dehydrogenase (Aasdh), transcript variant X1, mRNA	0	0	0	0	0	0	0	0	0	0	0	0	0	0.09	0	0	0	0	0	0
XM_028855702.2	Plxnc1	plexin C1 (Plxnc1), mRNA	6.04	7.8	10.9	6.86	7.85	14.75	11.62	8.87	11.81	27.27	17.47	23.41	20.67	16.21	10.56	8.51	4.79	4.65	1.58	28.7
XM_028855704.2	Mrpl42	mitochondrial ribosomal protein L42 (Mrpl42), mRNA	16.87	13.32	12.4	14.13	14.92	18.26	21.42	13.49	14.31	23.13	13.14	7.56	5.88	14.04	14.8	10.01	13.69	3.9	1.74	12.58
XM_028855706.2	Cradd	CASP2 and RIPK1 domain containing adaptor with death domain (Cradd), transcript variant X1, mRNA	0.03	0.35	0	0	0	0	0.1	0	0	0	0	0	0	0	0	0	0.47	0	0	0
XM_028855707.2	Cradd	CASP2 and RIPK1 domain containing adaptor with death domain (Cradd), transcript variant X4, mRNA	1.28	2.81	1.32	1.25	1.64	2.06	2.37	0.47	0.87	2.64	1.54	1.73	0.59	1.55	2.42	0.7	1.03	0.33	0.17	1.87
XM_028855708.2	Socs2	suppressor of cytokine signaling 2 (Socs2), transcript variant X1, mRNA	3.13	6.53	2.82	2.41	4.43	1.61	5.5	2.68	1.99	5.09	7.1	5.63	3.65	7.32	6.7	5.9	12.13	1.76	0	10.26
XM_028855709.2	Ube3a	ubiquitin protein ligase E3A (Ube3a), transcript variant X1, mRNA	0.9	2.19	2.42	0.63	0.9	0.49	0.64	0	1.42	0.75	0	0	0	1.3	1.57	0.57	0.59	0	0	0.59
XM_028855710.2	Ube3a	ubiquitin protein ligase E3A (Ube3a), transcript variant X2, mRNA	1.56	1.48	0	1.26	2.07	0.71	1.6	0.35	0.26	2.73	1.35	0.47	0.79	0.77	1.58	0.5	1.28	0.13	0	0.38
XM_028855711.2	Ube3a	ubiquitin protein ligase E3A (Ube3a), transcript variant X3, mRNA	2.44	4.99	3.37	1.63	2.58	2.48	2.39	2.23	2.54	3.1	0.18	1.45	1.35	2.74	1	1.11	1.8	0.26	0	1.52
XM_028855712.2	Ube3a	ubiquitin protein ligase E3A (Ube3a), transcript variant X5, mRNA	0	1.46	0.43	0	0.74	0	0	0	0	0.71	0.25	0	0	0	1.3	0.07	0	0	0.03	0
XM_028855713.1	Mdfic2	MyoD family inhibitor domain containing 2 (Mdfic2), mRNA	0	0	0	0	0	0	0	0	0	0	0	0	0	0	0	0	0	0	0	0
XM_028855714.2	Atp10a	ATPase phospholipid transporting 10A (putative) (Atp10a), transcript variant X1, mRNA	3.37	4.5	3.28	2.59	1.99	1.44	2.53	0.92	1.53	4.38	1.87	3.17	3.1	2.92	2.53	0.37	0.47	1.26	0.33	0.8
XM_028855715.2	Prokr1	prokineticin receptor 1 (Prokr1), mRNA	0.26	0.51	0.11	0.29	0.31	0.31	0.19	0.11	0.25	0.5	0.56	1.84	0.35	1	0.96	0.22	0.3	0.06	0.12	3.08
XM_028855716.2	LOC114681963	40S ribosomal protein S27-like (LOC114681963), mRNA	2.71	0	0.97	0	0.56	1.86	5.66	3.55	1.5	7.59	1.69	0.65	0.34	0.31	0	3.58	0.32	0.83	0.31	0.47
XM_028855717.2	LOC114681967	histone H2B-like (LOC114681967), mRNA	0	0	0	0	0	0	0	0	0	0	0	0	0	0	0	0	0	0	0	0
XM_028855718.2	Esx1	ESX homeobox 1 (Esx1), mRNA	0	0	0	0	0	0	0	0	0	0	0.04	0	0	0.04	0	0	0	0	0	0
XM_028855719.2	LOC114681971	cytochrome P450 2J6-like (LOC114681971), mRNA	0.28	0.68	0.14	0.42	0.23	0.33	0.29	0.19	0.07	0.67	0.22	0.34	0.15	0.37	0.45	0.06	0.02	0.02	0	0
XM_028855721.2	Gkn2	gastrokine 2 (Gkn2), mRNA	0	0	0	0	0	0.09	0	0	0	0	0	0	0	0	0	0.08	0	0	0	0
XM_028855722.2	Fam199x	family with sequence similarity 199, X-linked (Fam199x), mRNA	2.17	4.83	2.91	1.77	3.26	1.6	1.92	1.03	1.56	2.92	0.99	1.48	1.27	2.48	2.6	0.74	1.02	0.17	0.25	1.83
XM_028855724.2	LOC114681974	cytochrome P450 2J3 (LOC114681974), transcript variant X1, mRNA	0.51	0.48	0.1	0.2	0.15	0.56	0.08	0.13	0	0.23	0	1.47	0.78	0.55	0.57	0	0.14	0.16	0	1.05
XM_028855725.2	LOC114681974	cytochrome P450 2J3 (LOC114681974), transcript variant X2, mRNA	0.07	0.2	0.04	0.03	0	0.26	0.11	0.02	0.04	0.16	0.11	0.33	0.02	0.27	0.17	0.07	0.07	0.03	0	0.37
XM_028855727.2	LOC114681974	cytochrome P450 2J3 (LOC114681974), transcript variant X3, mRNA	0	0	0	0.05	0	0.23	0.02	0.07	0.08	0	0.66	0.2	0	0.39	0.27	0.07	0	0	0.1	0.1
XM_028855728.2	Morf4l2	mortality factor 4 like 2 (Morf4l2), transcript variant X4, mRNA	0.87	0.28	0.49	0	0.39	0.23	1.21	0.5	0	0.8	0.58	0.51	0.47	1.9	2.64	0.35	0.65	0.74	0	1.39
XM_028855729.2	Morf4l2	mortality factor 4 like 2 (Morf4l2), transcript variant X1, mRNA	16.46	17.28	16.5	14.84	18.7	16.13	19.09	11.5	13.42	25.26	16.91	12.81	9.74	30.57	26.48	30	49.47	4.47	2.25	24.32
XM_028855731.2	Morf4l2	mortality factor 4 like 2 (Morf4l2), transcript variant X3, mRNA	0	0	0.61	0.24	1	1.04	0	0	0	0	0	0	0.39	0	0	0.32	0.25	0	0.12	0
XM_028855732.2	Plp1	proteolipid protein 1 (Plp1), transcript variant X1, mRNA	1.3	0.62	1.95	0.57	1.13	0.89	1.02	0.36	0	1.06	0.2	0	0.4	0.36	0	0.49	0.62	0	0	0
XM_028855733.2	Plp1	proteolipid protein 1 (Plp1), transcript variant X2, mRNA	0.53	1.36	1.7	0.29	0.84	0	0.6	0.41	0.98	0.58	0.56	0.23	0	0.75	1.12	0.09	0	0.16	0.18	0.12
XM_028855734.2	LOC114681978	glycine receptor subunit alpha-4 (LOC114681978), mRNA	0	0	0.02	0	0.00961	0	0	0	0	0.02	0	0	0	0	0	0	0	0	0	0
XM_028855735.2	Zcchc18	zinc finger CCHC-type containing 18 (Zcchc18), mRNA	14.83	19.16	11.15	9.75	10.55	12.78	15.85	8.59	9.82	22.07	6.85	3.1	3.29	11.59	13.71	4.38	5.91	3.48	0.82	3.72
XM_028855739.2	Slc25a53	solute carrier family 25 member 53 (Slc25a53), mRNA	0.91	0.91	0.66	0.43	0.21	0.33	0.61	0.47	0.19	0.88	0.26	0.08	0.1	0.35	1.1	0.02	0	0.14	0.09	0.03
XM_028855740.1	Figla	folliculogenesis specific bHLH transcription factor (Figla), mRNA	0	0	0	0	0	0	0	0	0	0	0	0	0	0	0	0	0	0	0	0
XM_028855742.2	Tmsb15b	thymosin beta 15B (Tmsb15b), mRNA	0	0.14	0	0	0	0	0	0	0	0	0	0	0	0	0	0	0	0	0.32	0
XM_028855743.2	LOC114681984	melanoma antigen preferentially expressed in tumors-like (LOC114681984), mRNA	0	0.03	0	0	0.01	0.03	0.02	0	0	0	0	0	0	0	0.03	0	0	0	0	0
XM_028855744.2	Rab9b	RAB9B, member RAS oncogene family (Rab9b), mRNA	0.24	0.27	0.25	0.23	0.22	0.17	0.27	0.23	0.44	0.66	0.36	0.35	0.39	0.56	0.55	0.23	0.64	0.09	0.00713	0.48
XM_028855745.2	LOC114681989	cytochrome P450 2J3-like (LOC114681989), transcript variant X1, mRNA	0	8.11	0	4.11	0	7.1	0	0	0	0	3.55	0	3.98	0	4.14	2.11	0	0	0.32	0
XM_028855746.2	LOC114681989	cytochrome P450 2J3-like (LOC114681989), transcript variant X2, mRNA	0	0.83	0	2.99	0	0	0.29	0	0	0.07	2.03	0.13	0.94	0.07	1.44	1.2	0	0	0	0
XM_028855748.2	LOC114681989	cytochrome P450 2J3-like (LOC114681989), transcript variant X3, mRNA	1.33	0.48	1.17	0	1	0	1.23	1.27	0.89	2.61	0	1	0	1.43	0	0.14	1.48	0.04	0	2.89
XM_028855749.2	Gp9	glycoprotein IX platelet (Gp9), mRNA	46.99	88.92	56.8	65.51	45.73	52.77	121.08	54.6	119.86	59.18	30.35	64.06	115.44	94.87	5.2	49.72	4.95	41.74	22.21	35.4
XM_028855751.2	Tceal1	transcription elongation factor A like 1 (Tceal1), transcript variant X1, mRNA	0.19	0.05	0	0.05	0.26	0.29	0	0	0.08	0.25	0	0	0	0.19	0.17	0	0	0.05	0	0
XM_028855752.2	Tceal1	transcription elongation factor A like 1 (Tceal1), transcript variant X2, mRNA	0	0.19	0.25	0.51	0	0	0.3	0	0	0	0.09	0	0	0	0.11	0.09	0	0	0	0
XM_028855753.2	Aasdh	aminoadipate-semialdehyde dehydrogenase (Aasdh), transcript variant X2, mRNA	0.44	0.2	0.43	0.67	0	0.37	0.8	0.64	0	0.39	0.16	0.13	0	0	0.95	0.68	0	0	0	0.21
XM_028855754.1	Tceal1	transcription elongation factor A like 1 (Tceal1), transcript variant X3, mRNA	0	0	0	0	0	0	0	0	0	0	0	0	0	0	0.11	0	0	0	0	0
XM_028855755.2	LOC114681993	transcription elongation factor A protein-like 3 (LOC114681993), mRNA	0	0.08	0.52	0	0.16	0.12	0	0.22	0.08	0	0	0	0	0	0.06	0	0	0	0.1	0
XM_028855756.2	Mtarc2	mitochondrial amidoxime reducing component 2 (Mtarc2), mRNA	14.47	13.96	9.22	9.98	9.25	11.6	16.4	8.03	10.89	18.77	6.56	2.45	2.74	7.29	6.37	5.95	7.39	1.6	0.78	3.16
XM_028855757.2	Bpnt1	3'(2'), 5'-bisphosphate nucleotidase 1 (Bpnt1), transcript variant X1, mRNA	0	0.6	0	0	0	0.21	0	0	0	0.15	0	0	0	0	0	0	0.71	0	0	0
XM_028855758.2	Bpnt1	3'(2'), 5'-bisphosphate nucleotidase 1 (Bpnt1), transcript variant X2, mRNA	0.16	0.74	0.36	0.31	0.56	0.2	0.31	0	0.33	1.42	0.21	0.03	0	0.46	0.72	0.15	0.2	0	0.07	0.25
XM_028855759.2	Dnajb8	DnaJ heat shock protein family (Hsp40) member B8 (Dnajb8), mRNA	0	0	0	0	0	0	0	0	0	0	0	0	0	0	0	0	0	0	0	0
XM_028855760.2	Bpnt1	3'(2'), 5'-bisphosphate nucleotidase 1 (Bpnt1), transcript variant X3, mRNA	0.46	1.18	0.48	0.64	0.8	0.4	1.06	0	0.67	1.54	0	0.52	0.14	1.13	0.69	0.15	0.28	0	0.13	0.56
XM_028855761.2	Bpnt1	3'(2'), 5'-bisphosphate nucleotidase 1 (Bpnt1), transcript variant X4, mRNA	7.55	10.7	7.37	5.97	8.21	7.93	8.82	4.76	6.79	10.86	4.89	2.83	2.6	7.14	8.82	5.32	7.79	1.6	0.47	3.73
XM_028855762.2	Rab3gap2	RAB3 GTPase activating non-catalytic protein subunit 2 (Rab3gap2), mRNA	4.56	6.71	4.23	4	5.06	6.25	5.02	2.96	3.92	8.51	4.84	5.61	3.03	8.52	5.11	3.75	5.12	1.1	0.59	8.69
XM_028855763.2	Iars2	isoleucyl-tRNA synthetase 2, mitochondrial (Iars2), mRNA	9.61	12.92	6.83	7.39	8.36	9.65	10.33	7.48	10.25	13.78	4.92	4.63	3.54	9.19	9.7	7.34	8.99	1.53	0.99	6.74
XM_028855764.2	C15H1orf115	chromosome 15 C1orf115 homolog (C15H1orf115), mRNA	0.33	1.2	0.56	0.32	3.2	0.78	0.75	0.3	0.48	1.03	0.56	0.08	0.19	0.17	0.28	0.24	0.33	0.12	0.04	0.12
XM_028855765.2	Mark1	serine/threonine-protein kinase MARK1 (LOC114682003), partial mRNA	0.34	0.11	0.38	0.72	0.89	0.21	0.17	0.45	1.36	0.18	0.38	0.22	0.33	0.2	0.35	0.61	1.22	0.23	0.29	0.48
XM_028855767.2	Mark1	serine/threonine-protein kinase MARK1-like (LOC114682004), transcript variant X1, mRNA	0.29	0	0.09	0.07	0.54	0.05	0.06	0.11	0.4	0.22	0	0.15	0.02	0	0.39	0.12	0.69	0	0.4	0.35
XM_028855768.2	Mark1	serine/threonine-protein kinase MARK1-like (LOC114682004), transcript variant X2, mRNA	0	0	0	0	0	0.16	0	0.39	0.89	0	0.28	0	0	0.14	0	0	0	0	0	0
XM_028855769.2	Hlx	H2.0 like homeobox (Hlx), transcript variant X1, mRNA	0.92	1.49	0.81	0.73	1.38	3.02	2.2	0.57	0.39	3.33	3.63	5.47	3.8	7.02	0.75	1.08	0.34	0.93	0	8.33
XM_028855770.2	Mtarc1	mitochondrial amidoxime reducing component 1 (Mtarc1), mRNA	0.11	0.09	0.29	0.01	0.07	0.06	0.19	0.02	0	0.16	0.09	0.04	0.04	0.04	0.11	0.06	0	0.05	0.01	0.16
XM_028855771.1	Aff2	AF4/FMR2 family member 2 (Aff2), transcript variant X1, mRNA	0	0	0	0	0.00714	0	0	0	0	0	0	0	0	0	0	0	0	0	0	0
XM_028855772.1	Aff2	AF4/FMR2 family member 2 (Aff2), transcript variant X2, mRNA	0	0	0	0	0	0	0	0	0	0	0	0	0	0.00325	0	0	0	0	0	0
XM_028855773.1	Aff2	AF4/FMR2 family member 2 (Aff2), transcript variant X3, mRNA	0	0.00723	0.00621	0	0.02	0	0	0	0	0	0	0	0	0	0	0	0.00341	0	0	0
XM_028855774.1	Aff2	AF4/FMR2 family member 2 (Aff2), transcript variant X4, mRNA	0	0.00724	0.05	0	0.01	0	0	0	0	0.00879	0	0	0	0	0	0	0	0	0	0
XM_028855775.2	LOC114682012	uncharacterized LOC114682012 (LOC114682012), transcript variant X1, mRNA	0	0	0.12	0.09	0	0.15	0	0.18	0	0.13	0	0.12	0	0.33	0	0	0	0	0	0.13
XM_028855776.2	Znf831	zinc finger protein 831 (Znf831), transcript variant X1, mRNA	0.47	1.12	0	0.22	0.1	1.42	0.61	1.33	0	0.43	0.46	0.09	0.2	1.12	0.49	0.22	0.22	0.09	0.1	0.66
XM_028855777.2	Znf831	zinc finger protein 831 (Znf831), transcript variant X2, mRNA	2.08	3.32	2.19	1.62	1.31	0.44	2.22	0.4	2.52	4.71	0.27	0.17	0.54	0.47	0.12	0	0	0	0	0
XM_028855779.2	Nelfcd	negative elongation factor complex member C/D (Nelfcd), transcript variant X1, mRNA	6.78	10.39	5.08	3.5	4.61	7.03	8.83	3.94	7.81	10.54	3.38	4.81	4.41	7.63	7.56	4.14	7	1.14	0	3.11
XM_028855780.2	Nelfcd	negative elongation factor complex member C/D (Nelfcd), transcript variant X2, mRNA	7.19	9.33	7.65	7.51	6.14	8.47	9.65	6.38	7.47	11.78	6.47	4.62	2.71	8.63	5.69	5.37	6.52	0.83	1.46	8.04
XM_028855781.2	Ctsz	cathepsin Z (Ctsz), mRNA	86.59	105.56	85.96	100.22	104.07	184.68	147.56	108.62	112.59	219.02	120.54	73.87	45.63	211.68	55.15	178.99	204	33.33	9.16	145.78
XM_028855783.2	Tubb1	tubulin beta 1 class VI (Tubb1), transcript variant X1, mRNA	40.63	45.45	42.19	37.11	39.01	49.32	91.08	35.9	95.1	60.05	16.54	25.25	47.07	41.89	6.95	49.41	8.16	11.37	25.82	72.88
XM_028855784.2	Prelid3b	PRELI domain containing 3B (Prelid3b), mRNA	15.56	18.63	11.88	11.5	15.45	16.83	18.08	10.63	11.49	20.18	19.4	19.24	9.97	28.57	21.28	25.03	32.8	5.34	2.59	28.71
XM_028855785.2	Atp5f1e	ATP synthase F1 subunit epsilon (Atp5f1e), mRNA	145.35	200.07	153.03	154.8	144.79	158.41	166.7	134.55	155.38	197.54	148.74	95.65	135.75	102.58	106.79	163.68	188.97	137.95	71.12	81.98
XM_028855786.2	Npepl1	aminopeptidase like 1 (Npepl1), mRNA	10.01	14.34	6.84	8.32	8.55	9.69	13.65	7.74	12.93	14.44	5.48	2.1	3.25	7.64	6.04	7.22	7.56	1.57	1.27	4.39
XM_028855787.2	Edn3	endothelin 3 (Edn3), transcript variant X1, mRNA	0	0	0	0	0	0	0	0	0	0	0	0	0	0	0	0	0	0	0	0
XM_028855788.2	Edn3	endothelin 3 (Edn3), transcript variant X2, mRNA	0	0	0	0	0	0	0	0	0	0	0	0	0	0	0	0	0	0	0	0
XM_028855789.2	LOC114682025	neuroendocrine secretory protein 55-like (LOC114682025), transcript variant X2, mRNA	0	0	0	0	0	0	0	0	0	0	0	0	0	0	0	0	0	0	0	0
XM_028855790.2	LOC114682025	neuroendocrine secretory protein 55-like (LOC114682025), transcript variant X1, mRNA	0	0	0	0.05	0.03	0	0	0	0	0	0	0	0	0	0	0.05	0	0	0	0
XM_028855791.2	LOC114682028	guanine nucleotide-binding protein G(s) subunit alpha isoforms XLas-like (LOC114682028), mRNA	0.02	0.08	0.02	0.02	0.04	0.04	0.05	0.04	0.03	0.05	0	0.01	0.00881	0.06	0.02	0.02	0.03	0	0	0.0073
XM_028855792.2	Gnas	guanine nucleotide-binding protein G(s) subunit alpha (LOC114682029), transcript variant X1, mRNA	25.15	34.32	28.45	32.6	31.5	40.1	29.35	19.56	27.49	46.02	28.22	22.9	24.8	26.95	14.17	26.97	29.55	26.21	13.16	58.19
XM_028855793.2	Gnas	guanine nucleotide-binding protein G(s) subunit alpha (LOC114682029), transcript variant X2, mRNA	10.39	15.36	12.82	9.05	11.26	9.4	10.27	7.43	10.21	12.63	6.65	6.98	6.01	6.54	7.48	6.94	5.21	4.51	4.74	8.04
XM_028855794.2	Gnas	guanine nucleotide-binding protein G(s) subunit alpha (LOC114682029), transcript variant X3, mRNA	147.99	144.32	137.91	162.62	120.57	156.48	148.32	112.15	165.35	164.89	104.05	113.71	115.53	119.18	96.07	95.31	78.09	107.03	95.98	146.97
XM_028855795.2	Gnas	guanine nucleotide-binding protein G(s) subunit alpha (LOC114682029), transcript variant X4, mRNA	137.83	142.65	120.24	133.52	93.53	138.91	127.22	92.55	140.06	158.37	96.62	98	96.71	97.24	78.14	108.7	75.02	89.45	75.11	120.5
XM_028855797.2	Gnas	guanine nucleotide-binding protein G(s) subunit alpha (LOC114682029), transcript variant X6, mRNA	4.85	2.55	5.91	4.74	5.4	7.32	3.92	4.63	10.41	11.5	0	2.11	2.84	2.67	5.54	5.61	3.98	3.36	2.79	6.87
XM_028855798.2	Gnas	guanine nucleotide-binding protein G(s) subunit alpha (LOC114682029), transcript variant X5, mRNA	142.78	142.13	110.68	149.13	107.28	170.72	157.39	108.95	147.88	187.26	110.33	116.37	100.75	106.47	95.06	144.22	115.93	121.01	94.98	107.08
XM_028855799.2	Stx16	syntaxin 16 (Stx16), transcript variant X1, mRNA	0	0.07	0.66	1.46	1.11	1.03	0	0	0	0	0	0	0	0.01	0.63	0	0.2	0	0	0
XM_028855800.2	Stx16	syntaxin 16 (Stx16), transcript variant X5, mRNA	1.68	1.08	0	0.55	0.3	1.4	1.56	0.35	0.68	0.18	0.21	0.28	0	0.23	1.23	0.6	0	0	0	1.15
XM_028855801.2	Stx16	syntaxin 16 (Stx16), transcript variant X6, mRNA	0	0.91	0.61	0	0	0.21	1.1	0	1.18	1.13	0	0.24	0.21	1.41	0.88	0.26	0	0.15	0	0.33
XM_028855802.2	Stx16	syntaxin 16 (Stx16), transcript variant X7, mRNA	1.12	2.05	2.18	0.93	1.92	0.69	1.53	1.56	1.51	3.3	1.71	0.48	0.65	2.25	0.6	1.09	2.16	0.43	0.25	1.43
XM_028855803.2	Stx16	syntaxin 16 (Stx16), transcript variant X8, mRNA	0.51	0.49	0.16	0.63	0.8	0.78	0.41	0.38	0.57	0.99	0.26	0	0.75	1.78	0.64	0.12	0	0	0	0.25
XM_028855807.2	A3galt2	alpha 1,3-galactosyltransferase 2 (A3galt2), mRNA	0.06	0.04	0	0.05	0	0	0.15	0.07	0.1	0.03	0	0.01	0	0.06	0.08	0.24	0.03	0	0	0.17
XM_028855808.2	Fndc5	fibronectin type III domain containing 5 (Fndc5), mRNA	0.31	0.39	0.41	0.69	1.14	1.22	0.24	0.21	1.07	0.43	0.55	0.18	0.12	0.39	0.25	0.97	3.49	0.18	0.17	0.11
XM_028855810.2	Znf362	zinc finger protein 362 (Znf362), mRNA	8.72	11.24	6.36	5.52	7.08	8.74	11.94	5.07	9.01	12.24	3.11	1.5	2.38	5.18	8.86	3.9	4.12	1.21	0.4	2.69
XM_028855811.2	Rbbp4	RB binding protein 4, chromatin remodeling factor (Rbbp4), transcript variant X1, mRNA	77.78	97.45	66.7	61.43	74.02	62.39	80.73	52.57	58.04	102.26	51.16	52.89	35.73	84.58	80.2	63.76	83.53	15.76	7.95	60.22
XM_028855812.2	Rnf19b	ring finger protein 19B (Rnf19b), mRNA	15.99	18.69	11.24	12.14	12.72	21.24	21.08	18.47	13.54	26.6	36.65	80.15	39.8	77.72	48.07	43.05	55.12	18.25	5.83	87.53
XM_028855813.1	Ak2	adenylate kinase 2 (Ak2), transcript variant X1, mRNA	52.09	22.11	19.41	25.48	16.4	77.77	105.48	66.96	106.25	18.09	17.68	12.01	17.08	71.88	150.12	66.19	17.27	13.99	2.76	11.69
XM_028855814.2	Ak2	adenylate kinase 2 (Ak2), transcript variant X2, mRNA	59.12	40.28	32.82	32.05	40.74	80.05	140.23	60.58	123.11	28.87	26.99	23.22	21.78	62.84	138.02	80.96	25.23	13.3	7.7	71.33
XM_028855816.2	Sync	syncoilin, intermediate filament protein (Sync), transcript variant X1, mRNA	0.26	0.19	0.19	0.14	0.14	0.14	0.38	0.1	0.16	0.17	0.38	0.28	0.36	0.58	0.23	0.26	0.06	0	0.01	0.16
XM_028855817.2	Sync	syncoilin, intermediate filament protein (Sync), transcript variant X2, mRNA	0.01	0	0.02	0.01	0.03	0.03	0.06	0	0	0	0.03	0	0	0.05	0.02	0.06	0.05	0.03	0.03	0.05
XM_028855820.2	Trim62	tripartite motif containing 62 (Trim62), mRNA	2.42	2.73	1.94	1.9	1.91	1.82	1.62	1.56	1.88	4.29	1.33	0.69	1.3	1.69	1.29	0.75	0.95	0.19	0.18	0.75
XM_028855823.2	Hpca	hippocalcin (Hpca), transcript variant X1, mRNA	0.62	1.66	1.88	1.28	1.33	0.42	0.76	0.31	0.71	1.61	0.97	0.95	0.77	2.58	1.21	0.31	0.51	0.15	0.15	2.17
XM_028855824.2	Scn3a	sodium voltage-gated channel alpha subunit 3 (Scn3a), transcript variant X11, mRNA	0	0	0	0	0	0	0	0	0	0	0	0	0	0	0	0	0	0	0	0
XM_028855825.2	Aasdh	aminoadipate-semialdehyde dehydrogenase (Aasdh), transcript variant X3, mRNA	1.16	1.08	0.68	0.46	0.82	0.64	0.74	0	0	0.71	0.42	0.36	0	0.47	0.21	0.27	0.64	0	0.25	0.21
XM_028855826.2	Hpca	hippocalcin (Hpca), transcript variant X2, mRNA	0.01	0.06	0	0.11	0	0	0.06	0.03	0	0.03	0.04	0	0.02	0.18	0	0.02	0.02	0	0	0.07
XM_028855827.2	Azin2	antizyme inhibitor 2 (Azin2), transcript variant X1, mRNA	0	0	0	0	0.06	0.3	0	0	0.92	0	0	0	0	0	0	0.21	0	0	0	0
XM_028855828.2	Azin2	antizyme inhibitor 2 (Azin2), transcript variant X2, mRNA	0	0	0.13	0	0	0	0.15	0.15	0	0	0	0	0	0.03	0.17	0.27	0	0	0.03	0.11
XM_028855830.2	Azin2	antizyme inhibitor 2 (Azin2), transcript variant X3, mRNA	0.03	0.09	0	0.04	0	0.07	0	0.06	0.33	0.07	0	0	0	0	0.1	0.06	0	0	0	0.06
XM_028855831.2	Zscan20	zinc finger and SCAN domain containing 20 (Zscan20), transcript variant X1, mRNA	0.64	1.24	0.73	0.62	0.48	0.12	0	0	0.74	0.87	0.1	0.12	0.5	0	0	0	0	0	0	0.09
XM_028855832.2	Zscan20	zinc finger and SCAN domain containing 20 (Zscan20), transcript variant X2, mRNA	0	0	0	0	0	0.04	0.16	0.02	0	0.16	0	0	0	0	0.36	0.35	0	0.18	0.12	0
XM_028855833.2	Zscan20	zinc finger and SCAN domain containing 20 (Zscan20), transcript variant X3, mRNA	0	0.13	0	0.15	0.39	0.08	0.42	0.37	0.13	0.26	0.35	0.19	0	0.26	0.1	0.07	0	0	0	0.18
XM_028855834.2	Tlr12	toll-like receptor 12 (LOC114682047), mRNA	0.13	0.21	0.23	0.18	0.19	0.17	0.14	0.07	0.2	0.34	0	0	0.02	0	0.04	0	0	0	0	0.03
XM_028855835.2	Zbtb8os	zinc finger and BTB domain containing 8 opposite strand (Zbtb8os), transcript variant X1, mRNA	9.69	13.03	7.2	7.29	6.48	9.46	10.7	8.41	7.6	13.2	5.78	4.99	2.8	7.84	8.18	7.81	12.04	2.22	0.65	4.8
XM_028855836.2	Zbtb8os	zinc finger and BTB domain containing 8 opposite strand (Zbtb8os), transcript variant X2, mRNA	0.55	0	0.34	1.59	1.36	0.96	1.17	0.64	1.45	0.87	0.64	0	0.88	2.2	0.59	0	0	0	0	0.81
XM_028855837.2	Gsdmd	gasdermin-D-like (LOC114682050), transcript variant X2, mRNA	0	0	0	0	0	0.51	0	0	0	0	0	0.12	0	0	0	0	0.19	0	0.23	0
XM_028855838.1	LOC114682048	vomeronasal type-1 receptor 44-like (LOC114682048), mRNA	0	0	0	0	0	0	0	0	0	0	0	0	0	0	0	0	0	0	0	0
XM_028855839.2	Zbtb8a	zinc finger and BTB domain containing 8A (Zbtb8a), mRNA	0.04	0	0.02	0	0.17	0.12	0.15	0.04	0.08	0.05	0	0	0	0.05	0.09	0.14	0.16	0	0	0.05
XM_028855840.2	Kiaa1522	KIAA1522 ortholog (Kiaa1522), mRNA	0.22	0.15	0.08	0.23	0.31	0.97	0.57	0.34	0.31	0.3	0.29	0.09	0.06	0.52	0.26	0.38	0.25	0	0.03	0.59
XM_028855841.2	Yars1	tyrosyl-tRNA synthetase 1 (Yars1), mRNA	11.58	16.81	8.7	11.06	9.52	13.25	15.01	10.58	12.42	22.8	12.66	12.88	5.58	25.38	18.07	20.64	40.55	4.79	2.45	15.77
XM_028855842.2	S100pbp	S100P binding protein (LOC114682054), transcript variant X1, mRNA	0.99	0	1.18	0	1.08	2.78	3.44	0.08	0.72	1.57	0	1.4	0	4.61	1.09	0	0.36	0	0.22	2.74
XM_028855843.2	S100pbp	S100P binding protein (LOC114682054), transcript variant X2, mRNA	0.53	0.69	0.57	1.04	0.55	0.37	0.52	0.51	1.41	0.8	0.41	0.3	1.69	1.21	1.2	0.24	0.22	0	0	0.86
XM_028855844.2	S100pbp	S100P binding protein (LOC114682054), transcript variant X3, mRNA	1	1.22	0.46	0.46	0.73	0.09	0.47	0	0.7	2.02	0.34	0.18	0	0.24	2.19	0.39	0	0.33	0	0.29
XM_028855845.2	S100pbp	S100P binding protein (LOC114682054), transcript variant X6, mRNA	2.09	2.78	0.95	0.71	2.42	0.41	0.86	0	1.59	2.48	0.99	1.05	0.83	0.49	1.98	1.03	0.81	0.11	0.4	0.77
XM_028855846.2	S100pbp	S100P binding protein (LOC114682054), transcript variant X7, mRNA	0	1.67	0.58	0.36	0.41	0	0	0.73	0.79	1.76	0.79	0	0.78	0.57	0.32	0.37	0.64	0	0.18	0
XM_028855847.2	Phc2	polyhomeotic homolog 2 (Phc2), transcript variant X4, mRNA	0	0.02	0	0	0	0.02	0	0	0	0	0	0	0	0	0	0	0	0	0	0.01
XM_028855848.2	Phc2	polyhomeotic homolog 2 (Phc2), transcript variant X3, mRNA	1.01	0.67	0.08	0	0.08	0.44	0	0.53	2.37	0	0.24	0.01	0.09	0	0.92	0	0.03	0	0	0.35
XM_028855849.2	Phc2	polyhomeotic homolog 2 (Phc2), transcript variant X1, mRNA	0	0	0	0	0	0	0	0	0	0	0	0	0	0	0	0	0	0	0	0
XM_028855850.2	Phc2	polyhomeotic homolog 2 (Phc2), transcript variant X7, mRNA	0	0	0.05	0.42	0	0	0	0	0	0	0	0	0	0.14	0	0	0	0	0	0
XM_028855851.2	Phc2	polyhomeotic homolog 2 (Phc2), transcript variant X6, mRNA	0	0	0.03	0.01	0	0	2.06	0	0	0.56	0	0	0	0.03	0	0.44	0	0	0	0
XM_028855852.1	LOC114682056	vomeronasal type-1 receptor 48-like (LOC114682056), mRNA	0	0	0	0	0	0	0	0	0	0	0	0	0	0	0	0	0	0	0	0
XM_028855853.2	Phc2	polyhomeotic homolog 2 (Phc2), transcript variant X8, mRNA	15.01	15.08	8.92	8.96	9.04	13.87	23.71	13.06	12.88	19.67	9.49	8.27	4.83	16.59	11.74	11.45	10.9	3.11	1.28	11.67
XM_028855855.2	Elmo1	engulfment and cell motility 1 (Elmo1), mRNA	21.63	33.39	23.74	18.18	19.56	29.47	31.98	19.45	25.08	48.95	27.64	20.99	19.44	54.64	41.74	14.75	25.61	6.08	4.02	52.6
XM_028855856.2	Sfrp4	secreted frizzled related protein 4 (Sfrp4), mRNA	0.07	0.47	0.14	0.16	0.32	0.15	0.19	0.15	0.17	0.13	0.09	0.13	0	0.02	0.09	0.27	0	0	0	0.28
XM_028855857.2	Gpr141	G protein-coupled receptor 141 (Gpr141), transcript variant X1, mRNA	0	1.09	0.25	0.66	0.27	0.99	1.06	1.31	0.48	1.95	3.67	7.05	3.29	8.1	0.92	1.79	1.03	0.07	0	8.97
XM_028855859.1	LOC114682063	vomeronasal type-1 receptor 94-like (LOC114682063), mRNA	0	0	0	0	0	0	0	0	0	0	0	0	0	0	0	0	0	0	0	0
XM_028855860.2	LOC114682067	solute carrier family 22 member 20 (LOC114682067), mRNA	0	0.09	0	0	0.06	0.1	0.01	0	0	0.14	0	0.03	0.02	0.13	0	0.03	0	0	0	0
XM_028855861.2	Pcnx3	pecanex 3 (Pcnx3), mRNA	10.61	15.85	7.26	8.94	8.25	11.28	12.62	7.98	10.55	20.02	7.22	8.24	6.74	14.33	11.27	7.59	8.49	1.74	0.95	12.77
XM_028855862.2	Map3k11	mitogen-activated protein kinase kinase kinase 11 (Map3k11), transcript variant X1, mRNA	12.29	15.14	10.33	12.01	10.4	18.75	14.33	12.89	13.32	27.89	15.54	21.38	11.59	25.92	10.22	12.38	16.05	4.41	1.48	33.8
XM_028855863.2	Ltbp3	latent transforming growth factor beta binding protein 3 (Ltbp3), transcript variant X1, mRNA	0	0.09	0	0	0	0	0.16	0	0	0	0	0	0	0	0	0	0	0	0	0
XM_028855864.2	Ltbp3	latent transforming growth factor beta binding protein 3 (Ltbp3), transcript variant X2, mRNA	0	0.2	0	0	0	0	0	0	0	0.01	0.29	0	0	0	0	0	0.11	0	0	0
XM_028855866.2	Ltbp3	latent transforming growth factor beta binding protein 3 (Ltbp3), transcript variant X3, mRNA	0.02	0	0.04	0.01	0.93	0.47	0.2	0.36	0.13	0.32	0	0.03	0.01	0.07	0.34	0.76	0.33	0.03	0.03	0.04
XM_028855867.2	Scyl1	SCY1 like pseudokinase 1 (Scyl1), transcript variant X1, mRNA	10.62	13.86	8.23	9.42	8.31	14.05	13.71	8.92	9.68	20.39	10.91	8.65	5.84	14.26	7.57	16.44	17.6	3.08	1.27	13.37
XM_028855868.2	Scyl1	SCY1 like pseudokinase 1 (Scyl1), transcript variant X2, mRNA	2.35	2.54	1.08	0.65	1.12	1.98	3.72	1.13	1.12	3.16	1.58	2.98	1.59	4.62	3.19	2.1	2.41	0	0.23	4.23
XM_028855869.2	Ehd1	EH domain containing 1 (Ehd1), mRNA	21.3	17.17	13.24	18.07	20.63	31.67	21.71	36.62	14.95	31.06	114.74	132.09	72.17	208.82	61.11	127.84	180.99	25.08	6.72	160.42
XM_028855870.1	LOC114682072	vomeronasal type-1 receptor 94-like (LOC114682072), mRNA	0	0	0	0	0	0	0	0	0	0	0	0	0	0	0	0	0	0	0	0
XM_028855871.2	Ehbp1l1	EH domain binding protein 1 like 1 (Ehbp1l1), transcript variant X1, mRNA	0	0	0	0	0	0	0	0	0	0	0	0	0	0	0	0	0	0	0	0
XM_028855872.2	Ehbp1l1	EH domain binding protein 1 like 1 (Ehbp1l1), transcript variant X2, mRNA	19.97	29.5	17.05	17.98	16.66	29.02	22.32	15.76	21.33	45.8	40.85	45.18	36.6	71.93	28.6	14.8	19.43	6.01	3.33	35.93
XM_028855873.2	Ehbp1l1	EH domain binding protein 1 like 1 (Ehbp1l1), transcript variant X3, mRNA	1.28	2.74	0.99	0.6	1.26	2.29	0.67	1.71	1.06	4.32	1.12	1.55	0.97	1.45	1.48	2.46	3.33	1.11	0.43	2.82
XM_028855874.2	Ehbp1l1	EH domain binding protein 1 like 1 (Ehbp1l1), transcript variant X4, mRNA	0	0.26	0.25	0.51	0	0.62	0.8	0.92	1.27	1.23	1.22	0.86	0.84	0.56	0.33	0.67	0.46	0	0	0.7
XM_028855875.2	Ehbp1l1	EH domain binding protein 1 like 1 (Ehbp1l1), transcript variant X5, mRNA	1.54	2.45	2.18	1.86	1.71	2.06	4.45	2.14	2.15	4.15	4.48	4.43	1.47	4.34	1.14	3.31	2.64	1.94	0.22	2.82
XM_028855876.2	Ehbp1l1	EH domain binding protein 1 like 1 (Ehbp1l1), transcript variant X6, mRNA	0.15	0.5	0.27	0.26	0.21	1.11	0.58	0.2	0.36	0.2	0.71	0.37	0	0.32	0.23	0.16	0.24	0	0.12	0.78
XM_028855877.2	Ehbp1l1	EH domain binding protein 1 like 1 (Ehbp1l1), transcript variant X7, mRNA	0	0.33	0	0	0	0.35	0	0	0	0.63	0	0.12	0	0.08	0.17	0.29	0.11	0.16	0	0.21
XM_028855878.2	Ehbp1l1	EH domain binding protein 1 like 1 (Ehbp1l1), transcript variant X9, mRNA	0	0	0	0	0	0	0	0	0	0	0	0	0	0	0	0	0	0	0	0
XM_028855879.2	Ehbp1l1	EH domain binding protein 1 like 1 (Ehbp1l1), transcript variant X10, mRNA	4.42	5.03	2.06	3.4	3.93	6.02	4.7	2.52	4.53	4.42	5.4	4.52	1.25	5.93	2.8	3.64	6.99	0.43	0.72	6.47
XM_028855880.2	Ehbp1l1	EH domain binding protein 1 like 1 (Ehbp1l1), transcript variant X11, mRNA	0	0.2	0.11	0.5	0.1	0	0.09	0.39	0.19	0.22	0	0.64	0	0.32	0.7	0.44	0.46	0.28	0	0.17
XM_028855881.2	Ehbp1l1	EH domain binding protein 1 like 1 (Ehbp1l1), transcript variant X12, mRNA	0.12	0.25	0	0.28	0.14	0	0	0	0.28	0.21	0	0	0.1	0.1	0	0.23	0	0	0	0
XM_028855882.2	Ehbp1l1	EH domain binding protein 1 like 1 (Ehbp1l1), transcript variant X13, mRNA	0	0	0	0	0	0	0	0	0	0	0	0	0	0	0	0	0	0	0	0
XM_028855883.2	Ehbp1l1	EH domain binding protein 1 like 1 (Ehbp1l1), transcript variant X14, mRNA	8.52	9.35	5.39	8.15	8.77	11.22	10.81	9.91	6.63	10.95	16.45	21.91	9.88	19.18	9.46	11.76	15.99	6.68	1.98	26.74
XM_028855884.2	Vps51	VPS51 subunit of GARP complex (Vps51), mRNA	14.68	19.6	8.99	10.54	9.99	16.9	14.86	12.08	13.27	21.02	9.6	8.04	6.7	13.81	12.16	8.5	10.51	3.76	1.82	12.84
XM_028855885.2	Znhit2	zinc finger HIT-type containing 2 (Znhit2), mRNA	1.9	2.51	1.14	1.2	1.13	1.45	2.37	1.67	1.69	2.95	1.4	0.97	0.27	1.93	0.95	1.84	3.4	0.71	0.37	0.91
XM_028855886.2	Tm7sf2	transmembrane 7 superfamily member 2 (Tm7sf2), mRNA	3.5	3.15	1.45	1.53	1.73	2.04	3.12	1.73	2.33	3.36	1.34	0.99	0.97	2.3	2.7	0.59	0.85	0.56	0.4	1.09
XM_028855887.2	Syvn1	synoviolin 1 (Syvn1), mRNA	21.72	32.12	21.07	17.66	19.75	26.24	32.19	20.21	22.29	43.54	16.99	16.06	17.6	33.1	26.74	16.77	21.97	4.74	3.41	34.41
XM_028855888.2	Mrpl49	mitochondrial ribosomal protein L49 (Mrpl49), mRNA	16.79	18.48	14.57	13.67	12.53	12.5	16.55	11.95	13.72	27.14	8.56	8.3	5.69	15.59	16.33	16.84	23.73	4.92	2.21	9.44
XM_028855889.2	Fau	FAU ubiquitin like and ribosomal protein S30 fusion (Fau), mRNA	895.26	986.09	633.84	625.77	684.66	833.24	1021.87	746.56	703.63	1120.55	590.97	373.82	291.1	696.34	485.18	520.54	671.36	301.91	118.14	310.75
XM_028855890.2	Dpf2	double PHD fingers 2 (Dpf2), transcript variant X1, mRNA	1.44	1.11	0.19	0.77	2.09	2.08	3.26	1.99	1.49	2.69	4.66	1.29	4.52	3.82	1.97	2.05	2.83	0	0.24	2.82
XM_028855891.2	Dpf2	double PHD fingers 2 (Dpf2), transcript variant X2, mRNA	20.7	25.75	16.17	14.84	15.09	20.14	23.9	13.46	18.46	28.38	20.95	30.23	18.59	45.17	28.93	22.81	32.01	6.87	3.41	27.49
XM_028855892.2	Atg2a	autophagy related 2A (Atg2a), mRNA	11.28	15.15	8.35	9.92	10.02	14.48	14.11	11.83	12.16	22.38	8.18	5.71	5.51	16.39	11.34	5.85	6.84	2.06	1.31	13.63
XM_028855893.2	Slc27a1	solute carrier family 27 member 1 (Slc27a1), transcript variant X2, mRNA	0.8	0.79	0.76	0.85	1.33	0	2.18	0.66	0.46	1.29	0	0.3	0.43	0.85	2.03	0	0.45	0	0	0
XM_028855894.2	Slc27a1	solute carrier family 27 member 1 (Slc27a1), transcript variant X4, mRNA	0	0	0.27	0.32	0	0	0	0	0	0	0	0	0	0	0	1.18	0	0	0	0.67
XM_028855895.2	Slc27a1	solute carrier family 27 member 1 (Slc27a1), transcript variant X5, mRNA	0.43	0.26	0.28	0	0	0	0	0	0	0	0	0	0	0.88	0	0	0	0	0	0
XM_028855896.2	Ppp2r5b	protein phosphatase 2 regulatory subunit B'beta (Ppp2r5b), mRNA	7.04	11.8	8.64	8.85	11.51	10.18	9.37	5.92	9.37	16.53	7.38	5.09	5.14	6.73	10.41	6.86	7.08	3.96	4.21	4.06
XM_028855900.2	Mrpl34	mitochondrial ribosomal protein L34 (Mrpl34), mRNA	5.51	10.09	5.99	6.16	6.29	9	8.82	6.12	7.54	11.37	5.53	3.46	2.72	3.8	5.38	6.93	6.28	6.51	3.04	4.81
XM_028855901.2	Capn1	calpain 1 (Capn1), mRNA	34.65	40.83	22.09	27.4	27.32	44.41	44.62	27.75	29.98	57.97	56.21	57.18	32.6	78.7	27.04	17.57	17.8	9.42	5.2	63.81
XM_028855902.2	Colgalt1	collagen beta(1-O)galactosyltransferase 1 (Colgalt1), mRNA	8.89	15.56	7.32	8.78	9.32	13.24	14.31	6.5	9.88	16.72	6.89	2.14	1.47	7.38	5.97	3.55	5.17	1.61	0.7	3.83
XM_028855904.2	Ano8	anoctamin 8 (Ano8), mRNA	4.6	5.84	2.82	2.98	3.9	3.82	4.96	2.91	4.87	7.35	2.29	1.09	1.63	2.81	5	1.26	1.55	0.75	0.58	1.73
XM_028855905.2	LOC114682094	protein FAM53A-like (LOC114682094), mRNA	0.65	0.96	0.4	0.27	0.61	0.46	0.89	0.3	0.43	0.98	0.41	0.14	0.33	0.49	0.47	0.39	0.71	0.12	0.11	0.24
XM_028855906.2	Kat5	lysine acetyltransferase 5 (Kat5), transcript variant X1, mRNA	0.63	3.18	1.58	0.46	1.34	2.34	3.01	0	0	3.41	1.7	1.56	0.09	3.24	2.11	0	1.13	0	0	2.83
XM_028855907.2	Kat5	lysine acetyltransferase 5 (Kat5), transcript variant X2, mRNA	0	0	0	0.6	0.14	3.31	0	0	0	0	0	0	0	0	0.27	2.45	0	0	0.04	1.17
XM_028855908.2	Kat5	lysine acetyltransferase 5 (Kat5), transcript variant X3, mRNA	2.59	1.6	0	1.44	0.06	1.19	1.43	1.99	5.11	2.25	1.94	1.09	1.35	0.99	0.9	2.99	2	0.61	0.23	0
XM_028855909.2	Kat5	lysine acetyltransferase 5 (Kat5), transcript variant X4, mRNA	1.4	2.93	0.07	1.66	1.51	0	0	0	2.9	2.26	0.18	2.44	1.17	0	2.82	2.23	5.04	0	0.62	2.49
XM_028855910.2	Kat5	lysine acetyltransferase 5 (Kat5), transcript variant X5, mRNA	6.26	7.08	6.42	5.21	6.17	8.06	9.37	7.88	3.17	11.6	7.25	5.55	4.7	12.31	5.1	4.72	6.01	2.83	0.93	4.85
XM_028855911.1	Kat5	lysine acetyltransferase 5 (Kat5), transcript variant X7, mRNA	1.18	0	0	0	0	0	0	0	1.46	0	0	0	0	0	0	0	0	0	0	0.92
XM_028855912.1	Kat5	lysine acetyltransferase 5 (Kat5), transcript variant X8, mRNA	0	0.67	1.02	0	0.71	0	2.38	0.87	0	1.91	0.67	0.61	0.86	1.32	0	0	1.44	0	0	0.59
XM_028855913.2	Rnaseh2c	ribonuclease H2 subunit C (Rnaseh2c), mRNA	11.92	11.61	6.96	7.01	7.01	11.8	16.36	8.95	12.45	18.39	8.28	4.75	4.09	8.09	7.89	9.18	7.55	6.03	1.73	11.44
XM_028855914.2	Frmd8	FERM domain containing 8 (Frmd8), mRNA	14.38	22.18	12.24	12.17	11.42	19.06	18.63	13.49	14.64	29.25	14.76	13.67	9.35	21.85	13.32	14.32	14.05	3.81	1.02	18.45
XM_028855915.2	Rela	RELA proto-oncogene, NF-kB subunit (Rela), mRNA	31.36	39.54	24.07	24.87	23.87	33	40.45	27.28	27.06	53.52	47.27	46.57	31.52	67.26	35.17	51.88	60.8	15.14	5.34	58.61
XM_028855916.2	Sac3d1	SAC3 domain containing 1 (Sac3d1), mRNA	1.96	1.56	1.77	0.77	1	1.48	1.88	1.1	1.5	3.13	1.05	0.74	0.56	1.22	1.28	1.51	1.59	0.66	0.34	1.28
XM_028855917.2	Snx15	sorting nexin 15 (Snx15), mRNA	8.35	9.83	5.39	6.11	6.35	6.84	9.05	6.12	7.06	11.22	4.3	3.63	2.75	6.83	6.94	4.89	6.62	1.35	0.55	5.42
XM_028855918.2	Naaladl1	N-acetylated alpha-linked acidic dipeptidase like 1 (Naaladl1), mRNA	0.02	0.05	0.08	0	0.02	0.03	0.02	0	0.07	0.03	0	0	0	0	0.05	0.04	0	0	0	0.02
XM_028855919.2	Sipa1	signal-induced proliferation-associated 1 (Sipa1), mRNA	34.31	43.04	23.99	27.62	27.44	43.2	43.22	29.84	33.27	54.22	32.62	41.28	26.34	53.05	34.28	13.89	18.83	10.57	3.91	96.59
XM_028855920.2	Abhd8	abhydrolase domain containing 8 (Abhd8), mRNA	2.42	2.72	1.54	0.93	1.89	2.48	2.64	1.46	1.44	3.06	0.71	0.95	0.61	1.19	1.93	0.62	0.4	0.18	0.08	0.86
XM_028855922.2	Trh	thyrotropin releasing hormone (Trh), mRNA	17.31	16.44	9.61	29.08	32.09	27.54	5.59	51.67	13.29	59.34	74.72	21.71	11.51	81.81	15.04	3.4	5.73	4.7	1.76	25.8
XM_028855923.2	Tigd3	tigger transposable element derived 3 (Tigd3), mRNA	0.03	0.05	0	0	0	0	0	0	0	0.02	0	0.02	0	0.09	0.05	0.02	0.02	0.03	0	0.04
XM_028855924.2	Fam89b	family with sequence similarity 89 member B (Fam89b), mRNA	26.55	34.58	21.75	32.37	25.11	32.17	25.92	21.54	24.02	40.81	24.09	15.43	17.13	21.96	19.54	13.03	12.9	10.88	7.94	22.98
XM_028855925.2	Znrd2	zinc ribbon domain containing 2 (Znrd2), mRNA	6.93	10.94	5.69	4.52	5.73	10.69	11.53	6.09	6.76	11.64	8.32	6.33	3.45	10.58	12.36	10.89	14.98	2.93	1.91	5.76
XM_028855926.2	LOC114682110	sororin (LOC114682110), mRNA	0.47	0.26	0.45	0.75	0.73	0.44	0.69	0.44	0.32	0.5	0.43	0.6	0.12	1.3	4.42	1.84	0.72	0.48	0.21	2.26
XM_028855927.2	Arl2	ADP ribosylation factor like GTPase 2 (Arl2), mRNA	18.64	31.44	12.72	13.12	13.95	18.07	20.32	14.92	17.26	27.65	11.73	6.14	4.01	12.19	8.88	14.57	18.28	4.64	2.03	5.6
XM_028855928.2	Cdc42ep2	CDC42 effector protein 2 (Cdc42ep2), mRNA	2.19	3.33	3.14	2.59	4.6	4.5	4.1	2.54	3.23	6.06	19.16	18.63	11.76	31.95	6.26	31.31	33.88	9.17	0.69	12.59
XM_028855929.2	Dda1	DET1 and DDB1 associated 1 (Dda1), transcript variant X1, mRNA	10.99	15.36	7.71	8.31	9.25	14.55	16.76	12.49	12.06	19.18	11.34	10.24	6.55	13.63	11.74	16.32	22.01	3.3	1.12	23.62
XM_028855931.2	Dda1	DET1 and DDB1 associated 1 (Dda1), transcript variant X3, mRNA	3.35	2.39	1.45	1.63	2.3	2.19	2.79	2.62	2.91	3.41	3.01	2.16	1.77	3.93	1.93	1.79	3.35	1.1	0.67	2.49
XM_028855932.2	Cdc42bpg	CDC42 binding protein kinase gamma (Cdc42bpg), mRNA	0.14	0.24	0.19	0.23	0.42	0.2	0.28	0.17	0.28	0.3	0.11	0.07	0.07	0.25	0.15	0.08	0.12	0.05	0.01	0.16
XM_028855933.2	Pgls	6-phosphogluconolactonase (Pgls), transcript variant X2, mRNA	14.95	16.23	10.12	10.45	9.44	18.42	20.48	14.26	12.55	27.14	10.3	4.03	3.14	10.49	6.83	12.98	16.33	2.63	1.37	11.41
XM_028855934.2	Zfpl1	zinc finger protein like 1 (Zfpl1), transcript variant X2, mRNA	7.7	7.65	3.82	6.44	4.08	7.18	8.37	7.67	6.4	10.7	8.55	7.22	4.61	9.56	6.81	5.49	8.03	1.41	0.45	8.02
XM_028855935.2	Zfpl1	zinc finger protein like 1 (Zfpl1), transcript variant X1, mRNA	0.68	1.38	0.79	0.27	0.44	0	0.93	0	0.4	0	0.73	1.41	0.09	1.83	1.1	0	0.25	1.16	0	1.87
XM_028855936.2	Zfpl1	zinc finger protein like 1 (Zfpl1), transcript variant X3, mRNA	0	0.19	0	0	0	0	0.68	0	0.21	0	0	0.59	0	0.56	0	0.28	0	0	0.74	0.26
XM_028855937.2	Zfpl1	zinc finger protein like 1 (Zfpl1), transcript variant X4, mRNA	0	0	0	0	0	0.08	0	0.43	0.07	1.97	0	0.35	0.56	0.07	0	0	1.26	0	0	0.94
XM_028855938.2	Tmem262	transmembrane protein 262 (Tmem262), transcript variant X1, mRNA	0.39	0	0.88	0.58	0	1.17	0.34	0	0	1.37	0.31	0.45	0	1.03	0	0.32	0	0	0	0.98
XM_028855939.2	Tmem262	transmembrane protein 262 (Tmem262), transcript variant X2, mRNA	0	0.69	0	0	0.38	0	0	0.65	0.11	0	0	0	0.19	0	0.21	0	0.36	0.08	0	0
XM_028855940.2	Pola2	DNA polymerase alpha 2, accessory subunit (Pola2), mRNA	5.26	7.58	4.46	4.07	4.56	5.69	7.35	3.63	5.09	10.07	12.35	11.99	7.41	21.63	12.39	34.81	31.53	3.9	1.19	15.48
XM_028855941.2	Gtpbp3	GTP binding protein 3, mitochondrial (Gtpbp3), transcript variant X1, mRNA	2.74	3.38	0.91	0.98	1.02	0.37	2.93	1.3	2.2	3.97	1.49	2.25	3	2.23	1.66	1.18	1.74	1.17	0	0
XM_028855942.2	Gtpbp3	GTP binding protein 3, mitochondrial (Gtpbp3), transcript variant X2, mRNA	1.59	2.58	2.47	2	2.25	4.4	2.95	1.89	2.02	4.66	1.52	1.16	0.46	4.11	3.65	1.97	1.89	0	0.79	4.11
XM_028855944.2	Mvb12a	multivesicular body subunit 12A (Mvb12a), transcript variant X1, mRNA	5.86	8.42	5.59	4.48	7.43	10.16	13.31	8.55	10.97	14.86	8.3	7.07	5.59	11.93	9.54	5.94	5.33	4.23	1.35	12.07
XM_028855945.2	Mvb12a	multivesicular body subunit 12A (Mvb12a), transcript variant X2, mRNA	3.23	3.31	4.3	2.75	3.37	5.04	5.61	2.62	2.15	6.13	4.34	3.94	1.49	6.85	5.06	3.53	2.34	2.15	0.34	6.14
XM_028855946.2	Slc25a45	solute carrier family 25 member 45 (Slc25a45), mRNA	8.42	13.35	4.94	7.17	7.22	7.58	9.32	6.55	6.42	13.05	5.41	4.24	3.21	8.49	7.21	2.45	3.03	1.09	0.61	5.08
XM_028855947.2	Kcnk7	potassium two pore domain channel subfamily K member 7 (Kcnk7), mRNA	0.15	0.37	0.8	0.75	0.11	0.18	0.21	0.35	0.24	1.16	0.3	0.37	0	0.29	0.06	0.15	0.13	0.22	0	0.09
XM_028855948.2	LOC114682126	plasmalemma vesicle associated protein (LOC114682126), transcript variant X1, mRNA	0.66	2.51	0.92	1.06	3.47	4.05	4.47	1.91	3.09	4.12	0	0	0	0	0.37	1.16	0	0	0	0.85
XM_028855949.2	Batf2	basic leucine zipper ATF-like transcription factor 2 (Batf2), mRNA	0.29	0.53	0.3	0.41	0.33	0.53	0.34	0.54	0.23	1.02	0.68	0.37	0.33	1	0.8	1.91	3.28	0.12	0.06	1.42
XM_028855950.2	Bst2	bone marrow stromal cell antigen 2 (Bst2), mRNA	3.33	4.37	9.61	5.13	8.93	4.32	5.86	6.26	2.73	14.04	7.45	27.95	3.57	15.8	12.88	4.19	22.72	10.39	2.09	7.78
XM_028855951.2	Niban3	niban apoptosis regulator 3 (Niban3), transcript variant X1, mRNA	15.05	15.97	20.7	6.38	11.27	7.65	24.92	10.86	17.1	18.66	7.15	2.65	4.89	8.73	8.94	5.78	4.39	3.32	4.07	0.73
XM_028855952.2	Majin	membrane anchored junction protein (Majin), mRNA	0	0.04	0	0	0	0.04	0.03	0	0	0.03	0	0.03	0.04	0.05	0.04	0	0.04	0.04	0	0
XM_028855953.2	LOC114682132	protein unc-13 homolog A-like (LOC114682132), mRNA	0.05	0.07	0	0.03	0	0	0.08	0	0	0	0	0	0.18	0	0.04	0	0	0	0	0
XM_028855956.2	LOC114682135	uncharacterized LOC114682135 (LOC114682135), mRNA	0	0	0	0	0	0	0	0	0	0	0	0	0	0	0	0	0.03	0	0	0
XM_028855957.1	Tmem221	transmembrane protein 221 (Tmem221), mRNA	0	0	0	0	0	0	0.05	0	0	0	0	0	0	0	0	0	0	0.13	0	0
XM_028855958.2	Smc2	structural maintenance of chromosomes 2 (Smc2), transcript variant X1, mRNA	3.36	4.66	4.3	3.05	3.69	3.32	4.48	1.77	2.44	4.26	1.89	1.93	1.15	3.54	7.93	3.55	2.13	0.8	0.4	6.27
XM_028855959.2	Smc2	structural maintenance of chromosomes 2 (Smc2), transcript variant X2, mRNA	0	0	0	0	0.34	0	0	0	0.26	0	0	0	0	0	0.8	0.2	0	0	0	0
XM_028855960.2	LOC114682142	E3 ubiquitin-protein ligase Topors-like (LOC114682142), transcript variant X1, mRNA	0	0	0	0	0	0	0	0	0	0	0	0	0	0	0	0	0	0	0	0
XM_028855961.1	LOC114682143	olfactory receptor 13C3-like (LOC114682143), mRNA	0	0	0	0	0	0	0	0	0	0	0	0	0	0	0	0	0	0	0	0
XM_028855962.1	LOC114682144	olfactory receptor 13F1 (LOC114682144), mRNA	0	0	0	0	0	0	0	0	0	0	0	0	0	0	0	0	0	0	0	0
XM_028855963.1	LOC114682146	poly(A) RNA polymerase GLD2 (LOC114682146), mRNA	0	0	0	0	0	0.04	0	0	0	0	0	0	0	0.02	0.02	0	0	0	0	0.02
XM_028855965.1	Thbs4	thrombospondin-4-like (LOC114682149), mRNA	0	0	0	0	0	0	0	0	0	0	0	0	0	0	0	0	0.13	0	0	0
XM_028855967.2	Fam151b	family with sequence similarity 151 member B (Fam151b), transcript variant X3, mRNA	0.17	0.4	0.59	0	0.52	0.4	0.03	0	0.09	0.23	0.07	0	0.42	0.29	0	0.46	0.15	0	0	0
XM_028855969.2	Fam151b	family with sequence similarity 151 member B (Fam151b), transcript variant X6, mRNA	5.17	9.08	4.95	5.35	6	8.24	6.59	4.86	6.32	11.52	4.57	2.63	0.83	8.4	3.57	2.18	4.81	0.67	0.45	6.37
XM_028855971.2	Ankrd34b	ankyrin repeat domain 34B (Ankrd34b), transcript variant X1, mRNA	0	0	0	0	0	0	0	0	0	0	0	0	0	0	0	0	0	0	0	0
XM_028855972.2	Ankrd34b	ankyrin repeat domain 34B (Ankrd34b), transcript variant X2, mRNA	0	0.02	0.08	0	0	0	0.02	0	0	0.01	0	0.03	0	0	0	0	0	0	0	0
XM_028855974.2	LOC114682159	metaxin-3 (LOC114682159), mRNA	0.02	0.29	0.07	0	0.26	0.35	0.38	0	0.26	0.02	0.46	0.07	0.2	0.08	0.51	0.03	0	0.03	0.08	0
XM_028855975.2	Serinc5	serine incorporator 5 (Serinc5), mRNA	6.26	8.28	7.94	4.25	7.43	3.85	7.21	4.82	5.82	7.94	2.86	2.15	4.06	4.39	7.17	16.29	4.69	0.81	0.55	1.95
XM_028855977.2	Zfyve16	zinc finger FYVE-type containing 16 (Zfyve16), transcript variant X1, mRNA	0	0	0	0	0	0	0	0	0	0	0	0	0.11	0	0	0	0	0	0	0
XM_028855978.2	Zfyve16	zinc finger FYVE-type containing 16 (Zfyve16), transcript variant X3, mRNA	0	0.29	0	0	0	0	0	0	0	0	0	0	0	0.25	0.21	0	0	0	0	0
XM_028855979.2	Zfyve16	zinc finger FYVE-type containing 16 (Zfyve16), transcript variant X4, mRNA	0	0	0.21	0	0.66	1.02	0.49	0	0.42	0.54	0	0.13	0	0.37	0.46	0	0	0	0.02	0.26
XM_028855980.2	Zfyve16	zinc finger FYVE-type containing 16 (Zfyve16), transcript variant X6, mRNA	1.75	2.73	2.12	2.18	2.01	1.63	2.32	0.91	1.67	3.19	1.55	1.67	1.08	2.85	0.83	1.92	2.13	0.17	0.19	1.82
XM_028855982.2	Zfyve16	zinc finger FYVE-type containing 16 (Zfyve16), transcript variant X7, mRNA	0.52	0.92	0.29	0	0.31	0.57	0.08	0	0.38	0.78	0.44	0.54	0.61	0.15	0.76	0	0	0.14	0	0.69
XM_028855983.2	LOC114682165	dihydrofolate reductase (LOC114682165), transcript variant X2, mRNA	7.62	16.24	7.56	6.44	7.62	8.17	8.74	3.2	8.22	12.48	5.31	2.29	5.35	7.6	10.94	2.43	4.03	0.98	0.29	4.53
XM_028855984.2	LOC114682165	dihydrofolate reductase (LOC114682165), transcript variant X1, mRNA	4.68	3.66	2.25	1.97	3.52	3.13	4.92	3.1	3.16	5.27	2.11	1.58	1.74	3.41	5.25	1.68	1.02	1.38	0.95	1.54
XM_028855985.2	Spz1	spermatogenic leucine zipper 1 (Spz1), mRNA	0	0	0	0	0	0	0	0	0	0	0	0	0	0	0	0	0	0	0	0
XM_028855986.2	Sh3bgrl	SH3 domain binding glutamate rich protein like (Sh3bgrl), mRNA	35.39	64.25	49.63	27.78	48.89	44.7	38.45	28.03	30.1	53.63	35.61	61.69	26.94	58.66	46.52	26.94	48.73	10.69	4.14	100.71
XM_028855987.1	LOC114682171	syntaxin-1A-like (LOC114682171), mRNA	0	0	0	0	0	0	0	0	0	0	0	0	0	0	0	0	0	0	0	0
XM_028855988.2	Tasl	TLR adapter interacting with SLC15A4 on the lysosome-like (LOC114682175), mRNA	0.76	2.02	1.68	0.56	1.69	1.39	1.13	0.63	0.53	1.31	0.7	0.98	0.42	1.13	0.9	1.49	2.55	0.15	0.09	1.28
XM_028855989.2	LOC114682176	SH3 domain-binding glutamic acid-rich-like protein 3 (LOC114682176), transcript variant X1, mRNA	0.07	0.1	0.18	0	0	0.57	0.08	0.41	0.31	0.13	0.29	0.04	0	0	0.12	0.3	0.3	0	0	0
XM_028855990.2	Hmgn5	high mobility group nucleosome binding domain 5 (Hmgn5), mRNA	5.4	5.01	5.44	3.93	5.07	4.6	5.17	2.37	3.79	7.31	2.84	2.91	2.65	4.38	7.58	4.05	5.22	2.06	1.01	8.19
XM_028855991.2	Brwd3	bromodomain and WD repeat domain containing 3 (Brwd3), mRNA	2.02	4.08	2.25	1.46	2.62	2.54	2.04	1.39	1.75	3.55	1.95	3.36	2.22	5.18	4.54	1.36	2.03	0.23	0.29	6.3
XM_028855992.2	LOC114682185	homeobox protein Rhox13-like (LOC114682185), mRNA	0	0	0	0	0.04	0	0	0	0	0	0	0	0	0	0	0	0	0	0	0
XM_028855993.2	Agtr2	angiotensin II receptor type 2 (Agtr2), mRNA	0	0	0	0	0	0	0	0	0	0	0	0	0	0	0	0	0	0	0	0
XM_028855995.2	Cracd	capping protein inhibiting regulator of actin dynamics (Cracd), transcript variant X1, mRNA	1.32	1.35	0.67	1.3	0.68	2.19	3.43	1.53	4.89	2.08	0.88	1.01	1.66	0.81	0.23	0.46	0.34	0.41	1.65	2.95
XM_028855996.2	Slc6a14	solute carrier family 6 member 14 (Slc6a14), mRNA	0	0	0	0	0	0	0	0	0	0	0	0	0	0.05	0	0	0	0	0	0
XM_028855997.1	Adap1	ArfGAP with dual PH domains 1 (Adap1), mRNA	5.05	6.68	4.37	5.83	4.68	9.12	8.12	8.42	5.37	9.3	5.35	4.8	3.61	12.25	5.52	5.15	7.94	1.66	0.77	20.85
XM_028855998.2	Get4	guided entry of tail-anchored proteins factor 4 (Get4), transcript variant X1, mRNA	11.01	11.74	7.57	8.34	8.09	9.3	11.97	8.69	9.89	16.56	6.22	7.32	4.65	11.26	10.43	12.64	11.69	2.2	1.02	9.96
XM_028855999.2	Get4	guided entry of tail-anchored proteins factor 4 (Get4), transcript variant X2, mRNA	0.5	1.71	0.28	1.37	0.16	0.88	1.3	0.71	0.93	0.9	1.36	0.29	0.18	0.3	0.63	0.38	0.91	0.17	0.29	0.7
XM_028856000.2	Gper1	G protein-coupled estrogen receptor 1 (Gper1), transcript variant X2, mRNA	0	0.48	0.33	0.35	0.29	0.72	0.9	0.38	0.52	1.12	0.76	0.13	0.22	0.85	0.32	0.09	0	0	0	0.35
XM_028856001.2	Gpr146	G protein-coupled receptor 146 (Gpr146), transcript variant X1, mRNA	1.86	2.48	1.53	0	1.8	2.42	2.33	2.39	0.02	3.21	1.56	0.03	0.9	4.38	1.51	0.69	0.33	0	0.16	1.85
XM_028856002.2	Gpr146	G protein-coupled receptor 146 (Gpr146), transcript variant X2, mRNA	0.03	0.1	0.04	0.02	0.32	0.13	0	0.02	0.03	0	0.09	0.00859	0.2	0.31	0.22	0.07	0	0.01	0	0.14
XM_028856003.2	Gpr146	G protein-coupled receptor 146 (Gpr146), transcript variant X3, mRNA	0.08	0.19	0.06	0.04	0.23	0.16	0.1	0.04	0.15	0.65	0.09	0.04	0	0.58	0.39	0.07	0	0.01	0	0.15
XM_028856004.2	Gpr146	G protein-coupled receptor 146 (Gpr146), transcript variant X4, mRNA	0	0.06	0	1.52	0	0	0	0	2.16	1.09	0	0.43	0	0	0	0	0.19	0.48	0	0.41
XM_028856005.1	LOC114682206	zinc finger protein 501-like (LOC114682206), transcript variant X1, mRNA	3.82	7.2	4.5	4.48	5.09	4.54	4.45	2.52	3.79	6.77	3.19	5.46	3.4	6.31	5.48	3.32	4.31	0.3	0	6.06
XM_028856006.1	LOC114682206	zinc finger protein 501-like (LOC114682206), transcript variant X2, mRNA	1.81	2.7	1.55	0.25	0.86	1.5	1.21	1.66	1.69	2	0.99	0.66	0.67	1.75	1.29	0.4	1.1	0	0	1.22
XM_028856007.1	LOC114682206	zinc finger protein 501-like (LOC114682206), transcript variant X3, mRNA	0.99	1.32	0.57	0.75	0.57	0.39	1.45	1.06	0.5	1.05	0.18	0	0.21	0.77	0.27	0	0.37	0	0.15	0.48
XM_028856008.1	LOC114682206	zinc finger protein 501-like (LOC114682206), transcript variant X4, mRNA	1.15	2	0.82	1.54	2.59	0.93	1.34	0.3	0.96	1.05	0.61	0.99	0.28	1.67	0.27	0.86	0.96	0.57	0.32	1.51
XM_028856009.1	LOC114682206	zinc finger protein 501-like (LOC114682206), transcript variant X5, mRNA	0.46	0.98	0.28	0.3	1.13	0.35	0.5	0.29	0.57	0.7	0.46	0.26	0.39	0.42	0	0.14	0.5	0	0	0.34
XM_028856010.1	LOC114682206	zinc finger protein 501-like (LOC114682206), transcript variant X6, mRNA	0	0	0.25	0.08	0.17	0	0	0	0	0.09	0	0.11	0.19	0.3	0	0.22	0.24	0.28	0	0.07
XM_028856011.1	LOC114682206	zinc finger protein 501-like (LOC114682206), transcript variant X7, mRNA	0.29	1.37	1.27	0.33	0.39	0.98	0.35	0.23	0	1.64	0.14	0.52	0.38	1.3	1.25	0	0	0.45	0	0.3
XM_028856013.2	Arsj	arylsulfatase family member J (Arsj), mRNA	0.04	0	0.02	0	0	0	0.01	0	0	0	0	0.02	0	0	0.02	0	0.02	0	0	0
XM_028856015.2	Fam20c	FAM20C golgi associated secretory pathway kinase (Fam20c), mRNA	0.2	0.47	0.28	0.67	0.19	0.06	0.27	0.07	0.39	0.32	0.47	0.04	0.09	0.05	0.08	0.94	0.14	0.03	0.02	0.02
XM_028856016.2	LOC114682213	zinc finger protein 883-like (LOC114682213), transcript variant X1, mRNA	0.69	1.18	0.7	0.49	0.56	0.17	0.87	0.46	0.5	0.62	0.41	0.08	0.31	0.22	1.11	0.27	0.06	0.19	0	0.2
XM_028856017.2	LOC114682213	zinc finger protein 883-like (LOC114682213), transcript variant X2, mRNA	0.11	0.31	0.11	0.24	0.35	0.66	0	0	0.22	0.05	0.33	0.25	0.17	0.38	0	0	0.19	0	0.07	0.31
XM_028856020.2	Foxl3	forkhead box L3 (Foxl3), mRNA	0	0	0	0	0	0	0	0	0	0	0	0	0	0	0	0	0	0	0	0
XM_028856021.2	Zfand2a	zinc finger AN1-type containing 2A (Zfand2a), transcript variant X1, mRNA	4.49	4.17	3.14	3.73	2.17	1.52	5.14	2.06	2.13	4.07	3	2.67	1.84	6.71	3.57	3.51	9.75	0.78	0.92	3.56
XM_028856022.2	LOC114682218	cytochrome c oxidase assembly protein COX19 (LOC114682218), mRNA	5.02	8.62	5.09	4.25	5.87	8.55	8.72	4.38	7.97	11.96	6.56	5.81	2.82	6.41	5.12	6.42	4.82	2.89	0.42	4.71
XM_028856023.2	LOC114682220	cytochrome P450 2W1 (LOC114682220), transcript variant X2, mRNA	0.28	0	0	0	0	0	0	0	0.18	0.42	0	0.03	0	0	0	0	0.22	0.02	0.02	0
XM_028856024.2	LOC114682222	vomeronasal type-2 receptor 116-like (LOC114682222), mRNA	2.69	2.44	1.81	2.8	0.35	1.95	1.89	2.61	2.83	1.36	2.25	1.21	3	0.68	4.65	2.55	2.89	1.33	2.89	1.32
XM_028856025.2	Prkar1b	protein kinase cAMP-dependent type I regulatory subunit beta (Prkar1b), transcript variant X2, mRNA	0	0	0.7	0	0.28	0	0.13	0	1.01	0.02	0	0	0	0.04	0	0	0.02	0	0	0
XM_028856026.2	Prkar1b	protein kinase cAMP-dependent type I regulatory subunit beta (Prkar1b), transcript variant X3, mRNA	0	0	0	0	0	0	0	0	0	0.02	0	0	0	0	0	0	0	0	0	0
XM_028856027.1	Dnaaf5	dynein axonemal assembly factor 5 (Dnaaf5), mRNA	2.18	3.52	1.74	1.94	1.71	2.11	3.2	1.57	2.19	3.91	1.02	0.75	0.52	1.28	1.65	1.66	2.1	0.22	0.25	1.22
XM_028856028.2	Uncx	UNC homeobox (Uncx), mRNA	0	0	0	0	0	0	0	0	0	0	0	0	0	0	0.03	0	0	0	0	0.03
XM_028856030.2	Camk2d	calcium/calmodulin dependent protein kinase II delta (Camk2d), transcript variant X1, mRNA	0	0	0	0	0	0	0	0	0	0	0	0	0	0	0	0	0	0	0	0
XM_028856031.2	Sun1	Sad1 and UNC84 domain containing 1 (Sun1), transcript variant X4, mRNA	6.13	10.09	4.88	4.67	4.68	6.92	5.63	4.57	6	12.43	3.48	3.34	1.86	5.41	3.91	2.41	3.6	0	0.52	2.88
XM_028856032.2	Sun1	Sad1 and UNC84 domain containing 1 (Sun1), transcript variant X6, mRNA	0	0	0	0	0	0	0.39	0	0	0	0	0	0	0	0	0	0	0	0	0
XM_028856033.2	Sun1	Sad1 and UNC84 domain containing 1 (Sun1), transcript variant X7, mRNA	0	0.53	0	0	0	0	0	0	0.27	0	0	0.12	0	0	0.52	0	0.14	0	0	0.24
XM_028856034.2	Sun1	Sad1 and UNC84 domain containing 1 (Sun1), transcript variant X8, mRNA	0	0	0	0	0	0	0	0	0	0	0	0	0	0	0	0	0	0	0	0
XM_028856035.2	Sun1	Sad1 and UNC84 domain containing 1 (Sun1), transcript variant X9, mRNA	0	0	0	0	0	0	0	0	0	0	0	0	0	0	0	0	0	0	0	0
XM_028856036.2	Sun1	Sad1 and UNC84 domain containing 1 (Sun1), transcript variant X10, mRNA	0.84	0.09	1.22	1.1	1.51	0	0.81	0.92	2.93	0.79	1.76	0.55	0.08	0.77	0.43	1.31	0.27	0.02	0	1.5
XM_028856038.2	Sun1	Sad1 and UNC84 domain containing 1 (Sun1), transcript variant X11, mRNA	0	0	0	0	0	0	0	0	0	0	0	0	0	0	0	0	0	0	0	0
XM_028856039.2	Sun1	Sad1 and UNC84 domain containing 1 (Sun1), transcript variant X12, mRNA	0	0	0	0	0	0	0	0	0	0	0	0	0	0	0	0	0	0	0	0
XM_028856040.2	Sun1	Sad1 and UNC84 domain containing 1 (Sun1), transcript variant X14, mRNA	0.78	0	0	0	0	0	0	0	0	0	0	0	0	0	0	0	0	0	0	0
XM_028856041.2	Camk2d	calcium/calmodulin dependent protein kinase II delta (Camk2d), transcript variant X2, mRNA	0	0	0	0	0	0	0	0	0	0	0	0	0	0	0	0	0	0	0	0
XM_028856042.2	Sun1	Sad1 and UNC84 domain containing 1 (Sun1), transcript variant X15, mRNA	0.00569	0.14	0	0.17	0	0.46	0	0	0.45	0	0.46	0	0	0.28	0.62	0	0	0	0	0
XM_028856043.2	Sun1	Sad1 and UNC84 domain containing 1 (Sun1), transcript variant X3, mRNA	0	0	0	0	0.39	0.02	0.63	0	0	0	0	0	0	0	0	0	0	0.79	0	0
XM_028856044.2	Sun1	Sad1 and UNC84 domain containing 1 (Sun1), transcript variant X17, mRNA	0.27	0	0	0.41	0	0	0	0	0	0	0	0	0	0	0	0	0	0.03	0	0
XM_028856046.2	Hnrnpc	heterogeneous nuclear ribonucleoprotein C (Hnrnpc), transcript variant X1, mRNA	9.15	0	0	0	2.72	0	0	0	0	0	0	0	4	5.27	0	0.03	4.36	0	2.93	8.21
XM_028856047.2	Hnrnpc	heterogeneous nuclear ribonucleoprotein C (Hnrnpc), transcript variant X2, mRNA	22.38	19.14	14.74	11.94	13.46	16.48	21.07	13.06	13.46	27.72	16.62	16.77	6.27	26.04	12.6	14	14.01	3.7	3.42	14.6
XM_028856048.2	Hnrnpc	heterogeneous nuclear ribonucleoprotein C (Hnrnpc), transcript variant X4, mRNA	9.05	12.94	11.47	7.07	7.25	11.58	13.71	7	9.44	11.91	12.03	10.74	8.46	12.17	13.39	11.66	10.56	3.63	0.28	13.79
XM_028856049.2	Hnrnpc	heterogeneous nuclear ribonucleoprotein C (Hnrnpc), transcript variant X3, mRNA	5.96	1.75	0.88	1.98	1.41	0.94	2.57	2.04	0	1.91	4.35	0.72	0.99	1.61	1.61	0	2.06	0.53	0	1.58
XM_028856050.2	Camk2d	calcium/calmodulin dependent protein kinase II delta (Camk2d), transcript variant X3, mRNA	0	0	0	0	0	0	0	0	0	0	0	0	0	0	0	0	0	0	0	0
XM_028856051.2	Hnrnpc	heterogeneous nuclear ribonucleoprotein C (Hnrnpc), transcript variant X5, mRNA	2.38	10.71	4.69	6.18	8.71	9.26	13.39	5.34	7.67	6.95	3.61	9.12	5.27	7.75	5.01	7.13	18.16	4.2	0.03	4.28
XM_028856052.2	Hnrnpc	heterogeneous nuclear ribonucleoprotein C (Hnrnpc), transcript variant X6, mRNA	0	7.52	4.6	2.98	4.26	1.89	6.22	4.47	4.07	2.17	1.3	7.64	1.79	5.26	12.75	5.15	10.2	0	0	0.12
XM_028856053.2	Hnrnpc	heterogeneous nuclear ribonucleoprotein C (Hnrnpc), transcript variant X7, mRNA	23.56	27.4	27.47	14.09	25.23	31.34	40.63	11.3	24.59	26.38	26.68	33.07	37.57	62.22	63.47	19.76	56.29	15.21	4.49	30.41
XM_028856054.2	Hnrnpc	heterogeneous nuclear ribonucleoprotein C (Hnrnpc), transcript variant X8, mRNA	1.27	1.32	0	0	0.48	0.71	0	0	0.66	0.54	0	1.16	0.41	0.5	1.69	0	0.45	0.62	0.12	0.8
XM_028856055.2	Hnrnpc	heterogeneous nuclear ribonucleoprotein C (Hnrnpc), transcript variant X9, mRNA	20.33	18.66	13.55	12.02	14.97	6.25	17.06	14.27	10.73	17.42	18.76	14.95	8.52	29.86	27.9	10.44	19.76	2.52	4.23	15.24
XM_028856056.2	Hnrnpc	heterogeneous nuclear ribonucleoprotein C (Hnrnpc), transcript variant X10, mRNA	10.27	4.69	4.9	4.31	6.07	9.83	9.1	5.52	7.89	13.97	7.67	1.64	7.48	15.71	0	2.65	4.28	3.72	0.89	8.75
XM_028856058.2	Camk2d	calcium/calmodulin dependent protein kinase II delta (Camk2d), transcript variant X4, mRNA	0	0	0	0	0	0	0	0	0	0	0	0	0	0	0	0	0	0	0	0
XM_028856059.2	Arhgef40	Rho guanine nucleotide exchange factor 40 (Arhgef40), transcript variant X5, mRNA	0	0.13	0	0.21	0.61	0.15	0.03	0.17	0.33	0.42	0.27	0.23	0	0.24	0.02	0.27	0.11	0.03	0	0.23
XM_028856060.2	Arhgef40	Rho guanine nucleotide exchange factor 40 (Arhgef40), transcript variant X8, mRNA	0	0.09	0.32	0	0	0	0	0	0	0	0	0	0	0	0	0	0	0	0	0
XM_028856062.2	Znf219	zinc finger protein 219 (Znf219), transcript variant X1, mRNA	2.14	2.91	1.53	1.62	1.78	1.52	2.03	1.01	1.76	4.14	0.67	0.19	0.77	1.46	2.02	0.78	0.6	0	0.1	0.71
XM_028856063.2	Cracd	capping protein inhibiting regulator of actin dynamics (Cracd), transcript variant X2, mRNA	0	0.03	0.02	0	0	0	0.47	0	0	0	0	0	0	0	0	0	0	0	0.59	0
XM_028856064.2	Znf219	zinc finger protein 219 (Znf219), transcript variant X4, mRNA	1.29	0.49	0.49	0.33	0.29	0.27	2.09	0.63	0	1.55	0.7	0.51	0	1.15	0.86	0	0	0	0	0.74
XM_028856065.2	Znf219	zinc finger protein 219 (Znf219), transcript variant X3, mRNA	0.36	0.49	0	0.05	0	0	0.34	0	0	0.16	0	0	0	0	0.26	0	0.4	0	0	0
XM_028856066.2	Znf219	zinc finger protein 219 (Znf219), transcript variant X6, mRNA	0	0.18	0	0	0	0	0	0	0	0	0	0	0	0	0	0	0	0	0	0
XM_028856067.2	Tmem253	transmembrane protein 253 (Tmem253), transcript variant X1, mRNA	1.35	2.09	1.4	1.08	1.04	0.2	1.94	1.64	1.43	2.61	0.78	0	0.37	0.97	3.54	0.45	0.3	0.57	0	0
XM_028856068.2	Camk2d	calcium/calmodulin dependent protein kinase II delta (Camk2d), transcript variant X5, mRNA	0	0	0	0	0	0	0	0	0	0	0	0	0	0	0	0	0	0	0	0
XM_028856069.2	Tmem253	transmembrane protein 253 (Tmem253), transcript variant X2, mRNA	0.86	0.67	0.17	0.23	0.46	0.31	0.71	0.4	0.36	0.89	0.23	0.03	0.29	0.31	1.68	0	0.08	0	0	0.1
XM_028856074.1	LOC114682238	olfactory receptor 5AU1 (LOC114682238), mRNA	0	0	0	0	0	0	0	0	0	0	0	0	0	0	0	0	0	0	0	0
XM_028856075.2	Ndrg2	NDRG family member 2 (Ndrg2), transcript variant X1, mRNA	0.8	2	1.79	0	2.24	1.79	4.33	0	1.59	2.8	1.04	1.16	0.43	0.16	0.47	0.68	0	0	0	0
XM_028856076.2	Ndrg2	NDRG family member 2 (Ndrg2), transcript variant X2, mRNA	4.24	6.68	3.12	2.74	3.16	0.64	1.89	2.76	2.55	2.98	1.73	0	0.72	1.02	1.09	0	0.83	1	0	0
XM_028856077.2	Ndrg2	NDRG family member 2 (Ndrg2), transcript variant X3, mRNA	1.88	0	0	0.36	0	0	0.87	0.6	0	0.43	0	0	0	0.73	0	0	0	0.68	0	0.71
XM_028856078.2	Camk2d	calcium/calmodulin dependent protein kinase II delta (Camk2d), transcript variant X6, mRNA	0	0	0	0	0	0	0	0	0	0	0	0	0	0	0	0	0	0	0	0
XM_028856079.2	Ndrg2	NDRG family member 2 (Ndrg2), transcript variant X4, mRNA	0.13	0.84	0.94	0.25	2.04	0	0.97	1.1	1.31	0.6	0	0	0.78	0.37	0.59	0.46	0	0	0.31	0
XM_028856080.2	Ndrg2	NDRG family member 2 (Ndrg2), transcript variant X5, mRNA	1.21	3.02	1.61	0.95	2.76	1.57	0.64	1.76	0	4.08	0.19	0	0.41	0.98	0.92	0	0.55	0	0	0
XM_028856081.2	Tppp2	tubulin polymerization promoting protein family member 2 (Tppp2), mRNA	0.94	0.61	0.22	0.33	0.12	0.07	0.63	0.54	0.53	0.87	0.04	0	0.24	0.05	0.24	0.04	0	0.21	0.04	0.03
XM_028856084.2	Eddm3b	epididymal protein 3B (Eddm3b), mRNA	0	0.1	0	0.02	0	0.32	0.19	0.16	0.11	0.02	0	0	0	0	0.05	0	0.09	0	0	0
XM_028856085.2	Mettl17	methyltransferase like 17 (Mettl17), transcript variant X1, mRNA	3.12	3.43	1.21	2.39	1.76	1.98	1.89	1.73	0.98	5.02	1.42	0.99	1.35	2.37	2.87	0.49	0.53	0.87	0	0
XM_028856086.2	Mettl17	methyltransferase like 17 (Mettl17), transcript variant X2, mRNA	14.35	19.51	8.89	8.26	8.5	8.83	14.16	9.68	11.14	18.56	5.06	1.55	3.28	9.18	6.69	2.69	3.35	1.1	0.78	2.5
XM_028856087.2	Camk2d	calcium/calmodulin dependent protein kinase II delta (Camk2d), transcript variant X7, mRNA	0	0	0	0	0	0	0	0	0	0	0	0	0	0	0	0.18	0	0	0	0
XM_028856088.2	LOC114682244	zinc transporter ZIP2-like (LOC114682244), mRNA	0.19	0.26	0.12	0.07	0.2	0.1	0.31	0.13	0.18	0.35	0.04	0.06	0.25	0.03	0.02	0.02	0	0.1	0.00998	0.06
XM_028856089.2	Sall2	spalt like transcription factor 2 (Sall2), transcript variant X1, mRNA	0	0	0	0	0	0	0	0	0	0	0	0	0	0	0	0	0	0	0	0
XM_028856090.2	Sall2	spalt like transcription factor 2 (Sall2), transcript variant X2, mRNA	1.51	2.47	0.72	0.78	0.94	0.78	1.92	0.66	1.08	1.72	0.5	0.17	0.19	0.3	2.42	0.16	0.05	0.16	0.08	0.16
XM_028856091.2	Chd8	chromodomain helicase DNA binding protein 8 (Chd8), transcript variant X1, mRNA	0	0	0	0	0	0	0	0	0	0	0	0	0	0	0	0	0	0.26	0	0
XM_028856092.2	Chd8	chromodomain helicase DNA binding protein 8 (Chd8), transcript variant X2, mRNA	2.04	3.38	1.19	0	2.06	0.34	1.37	0.66	3.15	2.46	0.99	1.21	0.35	3.7	1.71	0	1.33	0.25	0.28	2.1
[truncated: 52,468 more rows]
