# Supplementary material for: The infection-tolerant white-footed deermouse tempers interferon responses to endotoxin in comparison to the mouse and rat
Source: eLife. 2024 Jan 9;12:RP90135. doi: 10.7554/eLife.90135 (PMC10945503; doi:10.7554/eLife.90135)
Supplement: Figure 2—source data 2. [file elife-90135-fig2-data2.xlsx]

## Sheet: LPS4hVsCon4h_CD1_ncbi_v1
Figure 2-Source Data 2. RNA-seq data as TPM values for Mus musculus (MM) females (F) and males (M) treated with LPS (L) or saline alone (C)
transcript_accession	gene_name	product	MM1MC	MM3MC	MM5MC	MM7MC	MM17MC	MM9ML	MM11ML	MM13ML	MM15ML	MM29ML	MM19FC	MM21FC	MM23FC	MM25FC	MM27FC	MM31FL	MM33FL	MM35FL	MM37FL	MM39FL
NM_001001130.3	Zfp85	zinc finger protein 85 (Zfp85). mRNA	0.0536311	0.408517	0.162707	0.490104	0.145863	0.0237042	1.93816	0.054862	0.0512022	0.009487	0.168334	0.195274	0.0899724	0.175366	0	0	0.027298	0.008596	0.0581823	0.0305947
NM_001001144.3	Scap	SREBF chaperone (Scap). transcript variant 1. mRNA	0	1.32589	0.778793	1.06046	0.406117	0.166692	5.28093	0	0.396993	0.251474	0	0.331297	0	0.20675	0	0	0	0.253424	0	0.193081
NM_001001152.2	Zfp458	zinc finger protein 458 (Zfp458). transcript variant 1. mRNA	0	0	0	0	0	0	0	0	0	0	0	0	0	0	0	0	0	0	0	0
NM_001001160.3	Fbxo41	F-box protein 41 (Fbxo41). transcript variant 1. mRNA	0	0	0	0	0	0	0	0	0	0	0	0	0	0	0	0	0	0	0	0
NM_001001176.2	Taf9b	TATA-box binding protein associated factor 9B (Taf9b). transcript variant 2. mRNA	0	0	0	0	0	0	0	0	0	0	0	0	0	0	0	0	0	0	0	0
NM_001001177.2	BC051142	cDNA sequence BC051142 (BC051142). transcript variant 1. mRNA	0	0	0	0	0	0	0.0431835	0	0	0	0	0	0	0	0	0	0	0	0	0
NM_001001178.2	Ccdc148	coiled-coil domain containing 148 (Ccdc148). transcript variant 2. mRNA	0	0	0	0	0	0	0	0	0	0	0	0	0	0	0	0	0	0	0	0
NM_001001179.3	A2ml1	alpha-2-macroglobulin like 1 (A2ml1). mRNA	0	0	0	0	0	0	0.553045	0	0	0	0	0	0	0	0	0	0	0	0	0
NM_001001180.2	Zfp941	zinc finger protein 941 (Zfp941). mRNA	0.006721	0.006545	0	0	0.002509	0	0.216893	0	0.009981	0	0	0	0.0166157	0.00263	0.0151127	0	0	0	0	0.005964
NM_001001181.4	BC031181	cDNA sequence BC031181 (BC031181). transcript variant 1. mRNA	0.439035	1.09947	0.221993	0.625542	0.438995	0.155238	0.587636	0.243269	0.0349293	0.291249	1.02367	0.962766	0.600856	0.653375	0.71927	0.153233	0.0670402	0.518978	0.138919	0.354811
NM_001001182.3	Baz2b	bromodomain adjacent to zinc finger domain. 2B (Baz2b). mRNA	0	0	0	0	0	0	0	0	0	0.002718	0	0	0	0	0	0	0.006256	0	0	0
NM_001001183.1	Tmem204	transmembrane protein 204 (Tmem204). mRNA	0.0422599	0.0960313	0.0181306	0.0129191	0.0262926	0.0406771	0.278628	0.0672463	0.0104601	0.0116291	0.0530572	0.0108798	0.168326	0.027558	0.101363	0.0114719	0.0669204	0.0737564	0.0713162	0.125003
NM_001001184.2	Primpol	primase and polymerase (DNA-directed) (Primpol). transcript variant 1. mRNA	0	0.220162	0.0558415	0.0973818	0	0	0	0	0	0	0.0172015	0.005291	0.005645	0.351126	0	0	0	0	0	0
NM_001001185.3	BC048507	cDNA sequence BC048507 (BC048507). mRNA	0	0	0	0	0	0	0	0.0174769	0	0	0	0	0	0	0	0	0	0	0	0
NM_001001186.3	Zfp456	zinc finger protein 456 (Zfp456). mRNA	0.0429379	0.228946	0.135398	0.215601	0.0625118	0.0185984	1.11973	0.0486817	0.0717383	0.039878	0.150944	0.101976	0.111462	0.118441	0.0202759	0.007868	0.0152987	0.0168614	0.0434762	0.005715
NM_001001187.3	Zfp738	zinc finger protein 738 (Zfp738). mRNA	0.172317	0.237584	0.403699	0.402191	0.160453	0.0119805	1.7838	0.0207961	0.0388177	0.0263732	0.257668	0.121125	0.134027	0.238627	0.0365711	0.0378424	0.0331125	0.0108616	0.0220547	0.0206174
NM_001001295.2	Dis3l	DIS3 like exosome 3'-5' exoribonuclease (Dis3l). transcript variant 1. mRNA	0.0857347	0.415093	0.0504444	0.289804	0	0	0.504915	0.125707	0.0572963	0	0.006151	0.300814	0.012112	0.241524	0	0	0	0.0384771	0	0
NM_001001297.2	Thnsl1	threonine synthase-like 1 (bacterial) (Thnsl1). transcript variant 2. mRNA	0	0	0	0	0	0	0	0	0	0	0	0	0	0	0	0.0183886	0	0	0.009526	0
NM_001001309.3	Itga8	integrin alpha 8 (Itga8). transcript variant 1. mRNA	0.0314576	0.0481424	0.0809766	0.0494577	0.150982	0	0	0	0.003337	0	0.0940356	0.055534	0.0370342	0.0210999	0	0	0	0	0	0
NM_001001319.4	Pramel4	PRAME like 4 (Pramel4). transcript variant 1. mRNA	0	0	0	0	0	0	0	0	0	0	0	0	0	0	0	0	0	0	0	0
NM_001001320.1	Tbx10	T-box 10 (Tbx10). transcript variant 1. mRNA	0	0	0	0	0	0	0	0	0	0	0	0	0	0	0	0	0	0	0	0
NM_001001321.3	Slc35d2	solute carrier family 35. member D2 (Slc35d2). mRNA	0.211619	0.47214	0.297131	0.518723	0.547235	0	3.53285	0.11939	0.10714	0	0.483069	0.396722	0.185492	0.447116	0.425675	0	0	0	0.0876568	0
NM_001001322.2	Adamts13	a disintegrin-like and metallopeptidase (reprolysin type) with thrombospondin type 1 motif. 13 (Adamts13). transcript variant 1. mRNA	0	0	0	0	0	0	0	0	0	0	0	0	0	0	0	0	0	0	0	0
NM_001001326.1	Denn2b	DENN domain containing 2B (Denn2b). transcript variant 1. mRNA	0	0	0	0	0	0	0	0	0	0	0	0	0	0	0	0	0	0	0	0.0410925
NM_001001327.2	Vkorc1l1	vitamin K epoxide reductase complex. subunit 1-like 1 (Vkorc1l1). transcript variant 2. mRNA	0.0508189	0.180291	0	0.142318	0	0.0920911	0.0963611	0.0519853	0	0	0.0774752	0.0904147	0.053845	0	0.0195898	0.0665133	0.03104	0.0285089	0.0551315	0
NM_001001332.2	Cstdc6	cystatin domain containing 6 (Cstdc6). mRNA	0	0	0.320369	0.124518	0.962975	0.28004	2.26146	0.324068	0.352858	0.280211	0.312509	0.0786463	0.195803	0.0796833	0.488478	0	0.0322498	0.17772	0	0.0602407
NM_001001333.2	Hexdc	hexosaminidase (glycosyl hydrolase family 20. catalytic domain) containing (Hexdc). transcript variant 2. mRNA	0.0647481	0.165525	0	0.0556704	0	0	1.88313	0	0.004507	0.0100223	0.0152421	0.0515708	0.120057	0	0.0218393	0	0.0346044	0.009081	0	0
NM_001001334.2	Spag6	sperm associated antigen 6 (Spag6). mRNA	0	0	0.0204806	0	0	0	0	0	0	0	0	0	0	0	0	0	0	0	0	0
NM_001001335.2	Plekha8	pleckstrin homology domain containing. family A (phosphoinositide binding specific) member 8 (Plekha8). transcript variant 2. mRNA	0.076632	0	0.175155	0.0363521	0.068064	0.00654	0.478658	0.0409975	0.0382626	0	0	0	0	0.127171	0	0.012912	0.0376604	0.0118593	0.0367897	0.0386911
NM_001001444.2	Defb29	defensin beta 29 (Defb29). mRNA	0	0	0	0	0	0	0	0	0	0	0	0	0	0	0	0	0	0	0	0
NM_001001445.2	Trpv1	transient receptor potential cation channel. subfamily V. member 1 (Trpv1). mRNA	0	0	0	0	0	0.0241707	0.121994	0	0	0	0	0.005657	0	0	0	0	0	0	0	0
NM_001001446.3	Cyp2c23	cytochrome P450. family 2. subfamily c. polypeptide 23 (Cyp2c23). transcript variant 1. mRNA	0.008918	0	0	0	0	0	0.0835526	0	0	0	0	0	0	0.0104676	0.0120316	0	0.0127094	0	0	0
NM_001001447.3	Zscan22	zinc finger and SCAN domain containing 22 (Zscan22). transcript variant 2. mRNA	0	0.269127	0	0	0	0	0	0	0	0	0	0	0	0	0	0	0	0	0	0
NM_001001449.3	AF067063	cDNA sequence AF067063 (AF067063). mRNA	0	0.0433163	0.0254428	0.0407914	0.022138	0.036696	0.0308686	0.0471838	0.154127	0.0611973	0.0372279	0.0114508	0.0977435	0.0696105	0.0400059	0	0.0563461	0.0110896	0.0250197	0
NM_001001450.4	Ssxb2	synovial sarcoma. X member B2 (Ssxb2). transcript variant 1. mRNA	0	0	0	0	0	0	0	0	0	0	0	0	0	0	0	0	0	0	0	0
NM_001001451.1	Tas2r138	taste receptor. type 2. member 138 (Tas2r138). mRNA	0	0	0	0	0	0	0	0	0	0	0	0	0	0	0	0	0	0	0	0
NM_001001452.1	Tas2r143	taste receptor. type 2. member 143 (Tas2r143). mRNA	0	0	0.127791	0.0682941	0.155669	0	0.806222	0	0	0	0.0747935	0	0	0.0699262	0.0267915	0	0	0	0	0
NM_001001453.1	Tas2r144	taste receptor. type 2. member 144 (Tas2r144). mRNA	0	0	0	0	0	0	0	0	0	0	0	0	0	0	0	0	0	0	0	0
NM_001001454.4	Ttyh1	tweety family member 1 (Ttyh1). transcript variant 1. mRNA	0	0	0	0	0	0	0	0	0	0	0	0	0	0	0	0	0	0	0	0
NM_001001488.3	Atp8b1	ATPase. class I. type 8B. member 1 (Atp8b1). mRNA	0	0	0	0	0	0	0	0	0.0121168	0	0.003414	0	0	0	0	0	0	0	0.006884	0.00362
NM_001001489.3	Mfsd4b5	major facilitator superfamily domain containing 4B5 (Mfsd4b5). transcript variant 2. mRNA	0	0.0107865	0	0	0	0	0	0	0	0	0	0	0	0	0	0	0	0	0	0
NM_001001490.3	Oxgr1	oxoglutarate (alpha-ketoglutarate) receptor 1 (Oxgr1). mRNA	0	0	0.00302	0	0	0	0	0	0	0.002906	0	0	0	0.002754	0	0	0	0	0	0
NM_001001491.2	Tpm4	tropomyosin 4 (Tpm4). mRNA	25.362	28.3159	26.8006	71.0312	41.6862	21.133	120.004	21.5397	28.1839	26.0746	71.2425	57.4163	27.7358	39.5103	34.9836	20.5134	15.3526	35.6411	20.1767	30.3937
NM_001001492.2	Lca5l	Leber congenital amaurosis 5-like (Lca5l). mRNA	0	0	0	0	0	0	0.0258829	0	0	0	0	0	0	0	0	0	0	0	0	0
NM_001001493.2	Wdr83os	WD repeat domain 83 opposite strand (Wdr83os). mRNA	1.67622	3.04514	1.96381	2.45376	1.4079	0.505309	18.893	0.910473	1.10107	0.625369	2.38779	2.37763	2.20487	2.4342	1.66716	0.511908	1.2251	0.578674	0.571186	0.500589
NM_001001495.2	Tnip3	TNFAIP3 interacting protein 3 (Tnip3). mRNA	0.004647	0.0577014	0.0478479	0.089498	0.005204	0.235786	4.70218	0.368801	1.13611	0.0920704	0.0175027	0.013459	0	0.0109091	0.0125392	0.119209	0.245043	0.159021	0.294076	0.259791
NM_001001496.2	Gja6	gap junction protein. alpha 6 (Gja6). mRNA	0	0	0	0.005973	0	0	0	0	0	0	0.010902	0	0	0	0	0	0	0	0	0
NM_001001559.2	Usp17ld	ubiquitin specific peptidase 17-like D (Usp17ld). mRNA	0	0	0	0	0	0	0	0	0	0	0	0	0	0	0	0	0	0	0	0
NM_001001565.2	Chpf	chondroitin polymerizing factor (Chpf). transcript variant 2. mRNA	0.105086	0.0472347	0.166466	0	0.0663868	0	1.47267	0	0	0	0.155616	0.0967713	0	0	0.0327187	0	0	0	0	0
NM_001001566.3	Chpf	chondroitin polymerizing factor (Chpf). transcript variant 1. mRNA	0.0873746	0.197635	0.0507874	0.333456	0.113633	0.0592978	0.484141	0.10764	0.163247	0.111688	0.063696	0.205716	0.34841	0.310988	0.110279	0.0619749	0.224949	0.0505975	0.110587	0.0975445
NM_001001602.2	Dab2ip	disabled 2 interacting protein (Dab2ip). transcript variant 3. mRNA	0	0.005974	0	0	0	0	0.0170296	0	0	0	0	0	0	0	0	0	0.005828	0	0	0
NM_001001650.2	Prss48	protease. serine 48 (Prss48). mRNA	0	0	0	0	0	0	0	0	0	0	0	0	0	0	0	0	0	0	0	0
NM_001001714.1	Sohlh1	spermatogenesis and oogenesis specific basic helix-loop-helix 1 (Sohlh1). mRNA	0	0	0	0	0	0	0	0	0	0	0	0	0.008238	0	0	0	0	0	0	0
NM_001001735.2	Nsd3	nuclear receptor binding SET domain protein 3 (Nsd3). transcript variant 1. mRNA	0.342672	0.420631	0.462485	0.347008	0.81815	0.132524	0	0.33228	0	0	1.00983	0.835339	0.594204	0.301671	0.436644	0.0290695	0	0.371123	0.292152	0
NM_001001737.2	Zfp950	zinc finger protein 950 (Zfp950). transcript variant 3. mRNA	0	0.0234777	0.0114918	0.0245658	0.0279975	0	0.379235	0	0	0.0132677	0	0.0248256	0.002207	0	0	0	0	0	0	0
NM_001001738.3	Itprip	inositol 1.4.5-triphosphate receptor interacting protein (Itprip). transcript variant 1. mRNA	0	0	0.11283	0	0	0.0856497	0	0	0	0.277103	0	0	0	0	0	0.211359	0	0	0	0
NM_001001792.2	Zfp239	zinc finger protein 239 (Zfp239). transcript variant 1. mRNA	0	0	0	0	0	0	0	0	0.0161277	0	0.0218148	0	0	0.0135968	0.0468852	0	0	0	0	0
NM_001001796.4	Prrxl1	paired related homeobox protein-like 1 (Prrxl1). transcript variant 2. mRNA	0	0	0	0	0	0	0	0	0	0	0	0	0	0	0	0	0	0	0	0
NM_001001798.3	Atp11c	ATPase. class VI. type 11C (Atp11c). transcript variant 2. mRNA	0.295268	0.604297	0.538066	0.637443	0.212807	0.0904486	1.83517	0.0558235	0.175836	0	0.365203	0.257402	0.193338	0.374037	0.209047	0.0535682	0	0.0393607	0.0407014	0.054479
NM_001001803.3	Spink7	serine peptidase inhibitor. Kazal type 7 (putative) (Spink7). mRNA	0	0	0	0	0	0	0	0	0	0	0	0	0	0	0	0	0	0	0	0
NM_001001804.2	Ephx4	epoxide hydrolase 4 (Ephx4). transcript variant 1. mRNA	0	0	0.0893119	0	0	0	0.0866864	0	0	0	0	0	0	0	0	0	0	0	0	0
NM_001001805.2	Olfr576	olfactory receptor 576 (Olfr576). mRNA	0	0	0	0	0	0	0	0	0	0	0	0	0	0	0	0	0	0	0	0
NM_001001806.2	Zfp36l2	zinc finger protein 36. C3H type-like 2 (Zfp36l2). mRNA	6.25655	9.20846	7.70531	9.78207	8.16846	1.4401	98.3099	4.5061	2.98384	1.36434	8.06957	7.85643	5.70177	6.75105	4.41604	1.35799	2.71702	1.37783	1.85512	0.978796
NM_001001807.1	Olfr279	olfactory receptor 279 (Olfr279). mRNA	0	0	0	0	0	0	0	0	0	0	0	0	0	0	0	0	0	0	0	0
NM_001001808.2	Olfr221	olfactory receptor 221 (Olfr221). mRNA	0	0	0	0	0.0104777	0	0.116878	0	0	0	0	0	0	0	0	0	0	0	0	0
NM_001001809.2	Olfr218	olfactory receptor 218 (Olfr218). mRNA	0	0	0	0	0	0	0	0	0	0	0	0	0	0	0	0	0	0	0	0
NM_001001810.2	Olfr1206	olfactory receptor 1206 (Olfr1206). mRNA	0	0	0	0	0	0	0	0	0	0	0	0	0	0	0	0	0	0	0	0
NM_001001880.2	Mpzl1	myelin protein zero-like 1 (Mpzl1). transcript variant 2. mRNA	0	0	0.0200376	0	0	0	0	0	0.0173405	0	0	0.009018	0	0	0	0	0	0	0	0
NM_001001881.2	2510009E07Rik	RIKEN cDNA 2510009E07 gene (2510009E07Rik). mRNA	0.274722	0.314616	0.362319	0.660209	0.334248	0.159499	0.889761	0.172028	0.19644	0.167996	1.37114	0.679764	0.362653	0.276685	0.466746	0.252731	0.0725058	0.180754	0.133073	0.275388
NM_001001882.3	Rtel1	regulator of telomere elongation helicase 1 (Rtel1). transcript variant 1. mRNA	0.100341	0.316154	0.0354519	0	0	0	0.208916	0	0	0	0.130918	0.118526	0	0.0392598	0.0132724	0	0	0.0375268	0	0
NM_001001883.3	Hecw2	HECT. C2 and WW domain containing E3 ubiquitin protein ligase 2 (Hecw2). transcript variant 1. mRNA	0	0	0.037305	0	0	0	0	0	0	0	0.0226207	0	0	0	0	0	0	0	0.001983	0
NM_001001884.1	Nckap5l	NCK-associated protein 5-like (Nckap5l). mRNA	0.154613	0.288894	0	0.185492	0.237578	0	6.67035	0.171648	0	0	0	0	0.284462	0.30599	0.0606399	0	0	0	0	0
NM_001001885.2	Tmem151a	transmembrane protein 151A (Tmem151a). transcript variant 1. mRNA	0	0.0129122	0.0483497	0.0182393	0.0544429	0	0	0.005274	0	0	0	0	0.0163892	0.0311253	0	0	0	0	0	0
NM_001001892.2	H2-K1	histocompatibility 2. K1. K region (H2-K1). transcript variant 1. mRNA	18.8838	55.5553	26.8847	36.0257	33.7286	8.23368	67.2678	14.7657	46.7304	19.999	32.6875	56.1612	26.8649	36.8239	17.712	10.563	16.6309	10.5613	18.4552	13.0813
NM_001001932.3	Eea1	early endosome antigen 1 (Eea1). mRNA	0.0368794	0.455484	0.270416	0.325929	0	0.0691523	6.14283	0	0.387123	0.0622751	0.276409	0.262827	0.21827	0.103631	0.0814209	0	0.0382256	0.0288392	0.128716	0.141319
NM_001001979.2	Megf10	multiple EGF-like-domains 10 (Megf10). mRNA	0	0	0	0	0	0	0.0218389	0	0	0	0	0	0.001441	0.002736	0.003145	0	0	0	0.00295	0
NM_001001980.3	Limch1	LIM and calponin homology domains 1 (Limch1). transcript variant 1. mRNA	0	0	0	0	0	0	0	0	0	0	0	0	0.024873	0	0	0	0	0	0	0
NM_001001981.3	Utp14b	UTP14B small subunit processome component (Utp14b). transcript variant 2. mRNA	0.00474	0.0346218	0.0122015	0.026083	0	0.008799	0.266464	0.0169708	0.00528	0	0.104144	0.0219656	0.017578	0.0389467	0.006395	0	0.0202663	0	0.0149983	0.006309
NM_001001982.2	Ccdc9b	coiled-coil domain containing 9B (Ccdc9b). mRNA	0.0167122	0.0298389	0.0238998	0.0485357	0.0124773	0.0528549	0.133384	0	0.0186145	0.0137967	0.0955853	0.0150589	0.0321356	0.0130778	0.0100213	0.0136101	0.005293	0.008334	0.0141014	0
NM_001001983.2	Pi4ka	phosphatidylinositol 4-kinase alpha (Pi4ka). transcript variant 2. mRNA	0.445396	0.0198368	1.00845	0.758429	0.180966	0.262158	6.02632	0	0.190573	0.104255	0.509753	0.917158	0.236678	0.48455	0.188704	0.0597166	0.0696703	0.159973	0.0549975	0
NM_001001984.2	Kdm2a	lysine (K)-specific demethylase 2A (Kdm2a). mRNA	0.949458	1.37643	1.62833	1.79015	1.55986	0.345943	25.4229	0.417013	0.637473	0.238727	2.02708	1.41404	0.862374	1.5727	0.565719	0.175153	0.0652539	0.279837	0.266875	0.105852
NM_001001985.3	Nat8l	N-acetyltransferase 8-like (Nat8l). mRNA	0.222652	0.417346	0.277938	0.365342	0.300418	0.00332	0.125668	0.0640294	0.0149395	0	0.267751	0.332533	0.185696	0.214116	0.0760044	0.003277	0.0114694	0	0	0
NM_001001986.2	Nol4l	nucleolar protein 4-like (Nol4l). transcript variant 1. mRNA	0	0	0	0	0.0208996	0	0	0	0	0	0	0	0	0	0.008393	0	0	0	0	0
NM_001001999.1	Gp1bb	glycoprotein Ib. beta polypeptide (Gp1bb). transcript variant 1. mRNA	0.159603	0.0736273	0.227045	0.39868	0.103481	0.0467808	0.682099	0.21554	0.112276	0.202841	0.0843713	0.126513	0.186908	0.207062	0.141668	0	0.083803	0.103673	0	0.156539
NM_001002004.2	2610507B11Rik	RIKEN cDNA 2610507B11 gene (2610507B11Rik). mRNA	2.73937	3.44967	3.108	5.89755	3.48196	1.3902	16.3178	1.78061	2.70256	1.71262	7.61503	5.02837	2.07646	3.29439	3.09845	1.51528	1.11027	1.67138	1.94413	1.60482
NM_001002005.2	Panx2	pannexin 2 (Panx2). mRNA	0	0	0.0196934	0	0	0	0	0	0	0	0	0	0	0	0	0	0	0	0	0
NM_001002008.2	Zfp948	zinc finger protein 948 (Zfp948). transcript variant 1. mRNA	0.0259568	0	0.0709929	0.0267812	0	0	0	0	0.0325254	0	0	0.0263126	0.0561509	0.045702	0.030643	0	0	0	0	0
NM_001002011.3	Lmna	lamin A (Lmna). transcript variant 1. mRNA	0.263622	0.44929	0.459471	0.955757	0.750374	0.523356	2.64147	0.242518	1.33357	0.663096	1.49629	1.11984	0.644957	0.770372	0.774334	0.935911	0.982328	0.828797	0.378841	1.15871
NM_001002012.1	Hspa2	heat shock protein 2 (Hspa2). transcript variant 2. mRNA	0	0.110369	0	0	0.149992	0.144501	0.0643519	0.188531	0	0	0.129349	0.0557001	0.161315	0	0.0741338	0.0251707	0.0587325	0.107887	0.008693	0.0365696
NM_001002238.2	Tdrd1	tudor domain containing 1 (Tdrd1). transcript variant 1. mRNA	0	0	0	0	0	0	0	0	0	0	0	0	0	0	0	0	0	0	0	0
NM_001002239.3	Rpl17	ribosomal protein L17 (Rpl17). mRNA	120.646	146.613	121.089	132.145	113.231	47.2797	131.313	76.7455	95.69	47.3086	160.607	162.889	128.588	133.801	104.217	82.5162	73.2574	67.3579	66.7454	77.4147
NM_001002240.2	Tdrd1	tudor domain containing 1 (Tdrd1). transcript variant 2. mRNA	0	0	0	0	0	0	0	0	0	0	0	0	0	0	0	0	0	0	0	0
NM_001002241.2	Tdrd1	tudor domain containing 1 (Tdrd1). transcript variant 3. mRNA	0	0	0	0	0	0	0	0	0	0	0	0	0	0	0	0	0	0	0	0
NM_001002267.2	Tmem158	transmembrane protein 158 (Tmem158). mRNA	0.602559	0.630835	0.529952	1.3401	1.07406	0.366637	0.501827	0.461435	0.430653	0.646671	2.84322	1.73937	1.01796	1.39099	1.00943	0.809678	0.257628	1.05916	0.584692	0.775322
NM_001002268.3	Adgrg6	adhesion G protein-coupled receptor G6 (Adgrg6). mRNA	0	0	0.0173269	0	0	0	0	0	0	0	0	0	0	0	0	0	0	0	0	0
NM_001002272.3	Tro	trophinin (Tro). transcript variant 1. mRNA	0	0	0	0	0	0	0	0	0	0	0	0	0	0	0	0	0	0	0	0
NM_001002764.2	Smg6	Smg-6 homolog. nonsense mediated mRNA decay factor (C. elegans) (Smg6). mRNA	0.270145	0.574413	0.229866	0.662744	0.279003	0.11144	3.81066	0.222099	0.411223	0.0799142	0.356125	0.554649	0.335791	0.472118	0.265257	0.0806671	0.0791404	0.0841937	0.286828	0.0439494
NM_001002787.2	Ccin	calicin (Ccin). mRNA	0.0172555	0	0	0.0356071	0	0	0.646689	0.0102968	0	0	0	0.0199909	0	0	0	0	0	0.00968	0.0218398	0
NM_001002791.2	Defb22	defensin beta 22 (Defb22). mRNA	0	0	0	0	0	0	0	0	0	0	0	0	0	0	0	0	0	0	0	0
NM_001002842.2	Pram1	PML-RAR alpha-regulated adaptor molecule 1 (Pram1). transcript variant 1. mRNA	0.936904	0.854711	1.0336	1.3257	6.00848	0.421197	30.4547	1.52432	1.23522	0.246243	2.47259	1.57275	0.401805	1.78202	2.47136	0.158828	0.0545007	0.823789	0.546926	0.178157
NM_001002846.2	Fbxl12	F-box and leucine-rich repeat protein 12 (Fbxl12). transcript variant 2. mRNA	0.284107	0.57372	0.268873	0.218411	0.0561477	0	3.48394	0	0	0.0517375	0	0.193614	0.0619757	0	0.225478	0.102076	0.0238181	0	0	0
NM_001002894.2	Nlrp14	NLR family. pyrin domain containing 14 (Nlrp14). mRNA	0	0	0	0	0	0	0	0	0	0	0	0	0	0	0	0	0	0	0	0
NM_001002895.2	AI413582	expressed sequence AI413582 (AI413582). mRNA	0.563249	1.33217	1.17372	0.940889	0.690855	0.0995793	2.80616	0.176054	0.179247	0.166067	0.841856	1.28953	0.812297	1.18061	0.92277	0.0491465	0.114677	0.150466	0.305524	0
NM_001002896.3	Bfsp2	beaded filament structural protein 2. phakinin (Bfsp2). transcript variant 1. mRNA	0.0117546	0.0858573	0	0	0	0	0.091777	0	0	0	0	0	0	0	0	0	0	0	0	0
NM_001002897.3	Atg9b	autophagy related 9B (Atg9b). mRNA	0	0	0	0	0	0	0	0	0	0	0	0	0	0.0105373	0	0	0	0	0	0
NM_001002898.1	Sirpb1a	signal-regulatory protein beta 1A (Sirpb1a). mRNA	2.2817	3.1255	2.21398	2.71841	3.76524	0.105561	1.44296	0.118764	0.174179	0	3.14133	1.87755	1.26527	0.967842	1.40975	0.008683	0	0.191404	0.125951	0.406845
NM_001002900.1	Higd1c	HIG1 domain family. member 1C (Higd1c). mRNA	0	0	0	0	0	0	0.108101	0	0	0	0	0	0	0	0	0	0	0	0	0
NM_001002927.3	Penk	preproenkephalin (Penk). transcript variant 1. mRNA	0	0	0	0	0	0	0	0	0	0	0	0	0	0	0	0	0	0	0	0
NM_001002929.4	Nup85	nucleoporin 85 (Nup85). mRNA	0.3694	0.651075	0.914716	0.905878	0.238321	0.0894433	6.59599	0.244389	0.442754	0	0.0403288	0.832656	0.610494	0.8672	0.471303	0	0.457796	0.040545	0.34049	0.256541
NM_001003393.1	Igfl3	IGF-like family member 3 (Igfl3). mRNA	0	0	0	0	0	0	0	0	0	0	0	0	0	0	0	0	0	0	0	0
NM_001003405.4	Try5	trypsin 5 (Try5). mRNA	0	0	0	0	0	0	0	0	0	0	0	0	0	0	0	0	0	0	0	0
NM_001003666.2	Zfp457	zinc finger protein 457 (Zfp457). mRNA	0.0330928	0.006043	0.0159724	0.0455251	0.0138977	0	0.335894	0.0197472	0.009215	0	0.010387	0.004792	0.0460207	0.0242776	0	0	0	0.004641	0.0314135	0
NM_001003667.2	Krt77	keratin 77 (Krt77). mRNA	0	0	0	0	0	0	0	0	0	0	0	0	0	0	0	0	0	0	0	0
NM_001003668.2	Krt87	keratin 87 (Krt87). mRNA	0	0	0	0	0	0	0	0	0	0	0	0	0	0	0	0	0	0	0	0
NM_001003670.2	Gm5414	predicted gene 5414 (Gm5414). mRNA	0	0	0	0	0	0	0	0	0	0	0	0	0	0	0	0	0	0	0	0
NM_001003671.1	Pcdhac1	protocadherin alpha subfamily C. 1 (Pcdhac1). mRNA	0	0	0.004256	0	0	0	0	0	0	0	0	0	0	0	0	0	0	0	0	0
NM_001003672.2	Pcdhac2	protocadherin alpha subfamily C. 2 (Pcdhac2). mRNA	0	0	0.003942	0.004213	0	0	0	0	0	0	0	0	0	0	0	0	0	0	0	0
NM_001003685.3	Ghrhr	growth hormone releasing hormone receptor (Ghrhr). mRNA	0	0	0	0	0	0	0	0	0	0	0	0	0	0	0	0	0	0.0122971	0	0
NM_001003717.1	Osbpl8	oxysterol binding protein-like 8 (Osbpl8). transcript variant 2. mRNA	0.603095	1.08959	0.652666	1.08195	0.635431	0.316825	14.5877	0.38632	0.627876	0.233192	1.40466	0.787104	0.366669	0.8336	0.592829	0.199968	0	0.317617	0.652717	0.160554
NM_001003719.2	Ralgapa1	Ral GTPase activating protein. alpha subunit 1 (Ralgapa1). transcript variant 3. mRNA	0	0	0	0	0	0	0	0	0	0	0	0	0	0	0.002865	0	0	0	0	0
NM_001003817.1	Erbb2	erb-b2 receptor tyrosine kinase 2 (Erbb2). mRNA	0	0	0	0.004821	0	0.0130103	0.0711373	0	0.003903	0	0	0	0.004332	0.004113	0.004728	0	0	0	0.004435	0
NM_001003824.2	Kcnq2	potassium voltage-gated channel. subfamily Q. member 2 (Kcnq2). transcript variant 2. mRNA	0	0	0	0	0	0	0	0	0	0	0	0	0	0	0	0	0	0	0	0
NM_001003825.3	Kcnq2	potassium voltage-gated channel. subfamily Q. member 2 (Kcnq2). transcript variant 3. mRNA	0	0	0	0	0	0	0	0	0	0	0	0	0	0	0	0	0	0	0	0
NM_001003893.2	Masp2	mannan-binding lectin serine peptidase 2 (Masp2). transcript variant 1. mRNA	0.0114436	0	0	0	0	0	0	0	0	0.0177134	0	0	0	0.0100743	0	0.00699	0	0	0	0
NM_001003898.3	Tardbp	TAR DNA binding protein (Tardbp). transcript variant 6. mRNA	0.0296625	0.114238	0.0728851	0.0779025	0.0543583	0	0	0	0	0	0.110031	0.0687293	0.0266669	0	0	0	0	0	0	0
NM_001003899.2	Tardbp	TAR DNA binding protein (Tardbp). transcript variant 3. mRNA	0	0	0.045182	0.100299	0	0.0534692	0	0	0	0	0	0	0.0233659	0.0633928	0.107476	0	0	0	0	0
NM_001003908.2	Cltc	clathrin. heavy polypeptide (Hc) (Cltc). transcript variant 2. mRNA	2.62501	4.61493	4.05569	4.53192	2.75535	0.990653	27.1489	2.08321	2.83287	0.866937	4.96456	3.29546	2.48537	3.66417	1.86744	0.948423	0.627658	0.817031	1.40961	0.796467
NM_001003909.4	Ankib1	ankyrin repeat and IBR domain containing 1 (Ankib1). transcript variant 2. mRNA	0	0.108119	0.190518	0	0.220535	0.075238	0.775991	0.0899062	0	0.132565	0.132745	0.0566524	0	0	0	0.0258317	0	0.0563485	0	0
NM_001003910.2	Ttc41	tetratricopeptide repeat domain 41 (Ttc41). transcript variant 3. mRNA	0.006019	0	0	0	0.004494	0	0	0	0	0	0	0	0	0	0	0	0.002859	0	0	0
NM_001003911.2	Adamts7	a disintegrin-like and metallopeptidase (reprolysin type) with thrombospondin type 1 motif. 7 (Adamts7). transcript variant 1. mRNA	0	0	0	0	0	0	0.0857195	0	0	0	0	0	0.017962	0	0	0	0	0	0	0
NM_001003912.2	Arhgef11	Rho guanine nucleotide exchange factor (GEF) 11 (Arhgef11). transcript variant 1. mRNA	0	0	0.0198494	0	0	0.0127239	0	0	0	0	0	0	0	0	0	0	0	0	0	0
NM_001003913.2	Mars1	methionine-tRNA synthetase 1 (Mars1). transcript variant 2. mRNA	0.570346	1.1543	0.802898	1.05024	0.482373	0.22425	3.27489	0.18435	0.301091	0.345777	0.928652	0.870685	0.804171	0.965849	0.464908	0.148779	0.372557	0.249968	0.319578	0.225381
NM_001003915.2	Slc5a12	solute carrier family 5 (sodium/glucose cotransporter). member 12 (Slc5a12). transcript variant 1. mRNA	0	0	0	0	0	0	0	0	0	0	0	0	0	0	0	0	0	0	0	0
NM_001003916.2	Zc4h2	zinc finger. C4H2 domain containing (Zc4h2). transcript variant 1. mRNA	0	0.194523	0.105856	0	0	0	0	0.0280444	0	0	0.0885078	0.136119	0.135556	0.156302	0	0	0	0	0	0
NM_001003917.4	Atg9a	autophagy related 9A (Atg9a). transcript variant 2. mRNA	0	0.514231	0.260149	0.193703	0	0.401911	4.87979	0.43366	0.556505	0	0.225253	0.399921	0.286349	0.349214	0.425906	0.0860022	0.119757	0.473943	0.0689858	0.414147
NM_001003918.2	Usp7	ubiquitin specific peptidase 7 (Usp7). mRNA	0.374363	0.54688	0.427835	0.397351	0.162639	0.211679	8.26987	0.213761	0.156366	0.103906	0.526738	0.727207	0.444812	0.352298	0.137157	0	0.17248	0.0724187	0.0714815	0.0988027
NM_001003919.2	Ddx11	DEAD/H box helicase 11 (Ddx11). transcript variant 1. mRNA	0	0	0	0.0289872	0.009439	0	1.38854	0	0	0.0574042	0	0	0.0364657	0	0	0.0437581	0	0.0283698	0	0.0252428
NM_001003920.3	Brsk1	BR serine/threonine kinase 1 (Brsk1). transcript variant 1. mRNA	0.0203385	0.0339555	0.145845	0.0359733	0.006508	0.0179787	0.136113	0	0	0	0.025535	0.0100983	0.007183	0	0.0156803	0	0	0	0	0.0232049
NM_001003933.2	Rtn3	reticulon 3 (Rtn3). transcript variant 2. mRNA	0	0.0513662	0.0520451	0	0.0255958	0	0.746745	0	0	0	0.0176585	0	0	0.008255	0	0	0	0	0.0178016	0
NM_001003934.2	Rtn3	reticulon 3 (Rtn3). transcript variant 1. mRNA	0	0	0	0	0	0	0.28229	0	0	0	0	0	0	0	0	0	0	0	0	0
NM_001003939.2	Ttc41	tetratricopeptide repeat domain 41 (Ttc41). transcript variant 1. mRNA	0	0.0137188	0	0	0	0	0.41061	0.0112077	0	0	0	0	0.005804	0	0	0	0	0	0	0
NM_001003947.2	Cyp4x1	cytochrome P450. family 4. subfamily x. polypeptide 1 (Cyp4x1). mRNA	0.028568	0.0674147	0.028284	0.108832	0.0590643	0.0190371	2.47072	0.0603206	0.0220291	0.0190487	0.0441441	0.0916521	0.0679115	0.0773838	0.12749	0.005369	0.034451	0.0172592	0.030595	0.008775
NM_001003948.2	Pid1	phosphotyrosine interaction domain containing 1 (Pid1). mRNA	1.07372	1.46778	0.173273	1.27834	0.13238	0.150352	0.871658	0.0862116	0.299898	0	0.84923	0.7532	0.685955	0.127189	0.345548	0.104288	0.299498	0.180519	0.116365	0.244757
NM_001003949.4	Tmem259	transmembrane protein 259 (Tmem259). transcript variant 2. mRNA	1.42052	3.29546	1.27774	2.23176	1.25188	0.354593	57.4719	0.90545	0.584342	0.659645	1.72266	1.96362	2.59403	2.43952	1.37207	0.364802	0.63266	0.738037	0.653786	0.451222
NM_001003950.3	Rab3ip	RAB3A interacting protein (Rab3ip). transcript variant 2. mRNA	0	0	0	0.0432725	0.0281814	0	0.0196477	0	0	0	0.0394922	0	0	0	0	0	0	0	0	0
NM_001003951.3	Ces5a	carboxylesterase 5A (Ces5a). transcript variant 2. mRNA	0	0	0	0	0	0	0	0	0	0	0	0	0	0	0	0	0	0	0	0
NM_001003952.1	Sval3	seminal vesicle antigen-like 3 (Sval3). mRNA	0	0	0	0	0	0	0	0	0	0	0	0	0	0	0	0	0	0	0	0
NM_001003953.2	Kdm2b	lysine (K)-specific demethylase 2B (Kdm2b). transcript variant 1. mRNA	0.177134	0.381983	0	0.0881889	0	0	3.17699	0	0	0	0.120727	0	0.104268	0	0	0	0	0	0	0
NM_001003955.2	Rab11fip5	RAB11 family interacting protein 5 (class I) (Rab11fip5). transcript variant 1. mRNA	0.007113	0	0	0.0704507	0.137007	0	0.239908	0	0	0	0	0	0.0668216	0	0.0383855	0.0121642	0	0	0	0
NM_001003960.4	Dnmt3b	DNA methyltransferase 3B (Dnmt3b). transcript variant 2. mRNA	0	0.0478122	0	0	0.0137451	0	0	0	0	0	0	0	0	0	0	0	0	0	0	0
NM_001003961.4	Dnmt3b	DNA methyltransferase 3B (Dnmt3b). transcript variant 1. mRNA	0	0	0	0	0	0	0	0	0	0	0	0	0	0	0	0	0	0	0	0
NM_001003963.4	Dnmt3b	DNA methyltransferase 3B (Dnmt3b). transcript variant 4. mRNA	0	0	0	0	0	0	0.303006	0	0	0	0	0	0	0	0	0	0	0	0	0
NM_001003972.2	Senp7	SUMO1/sentrin specific peptidase 7 (Senp7). transcript variant 3. mRNA	0	0	0	0	0.135436	0	0	0	0	0	0	0	0	0.033401	0.115175	0	0.0405545	0.0478899	0.0630268	0.255668
NM_001003973.2	Senp7	SUMO1/sentrin specific peptidase 7 (Senp7). transcript variant 4. mRNA	0	0.0222482	0	0.230466	0	0	0.998853	0	0	0	0.325059	0	0.0188263	0.008938	0.0410959	0	0	0.128157	0.0771041	0
NM_001004025.4	Ppp3r2	protein phosphatase 3. regulatory subunit B. alpha isoform (calcineurin B. type II) (Ppp3r2). mRNA	0	0	0	0	0	0	0.0183247	0	0	0	0	0	0	0	0	0	0	0	0	0
NM_001004061.2	Fam170a	family with sequence similarity 170. member A (Fam170a). transcript variant 1. mRNA	0	0	0	0	0	0	0	0	0	0	0	0	0	0	0	0	0	0	0	0
NM_001004062.2	Crtc1	CREB regulated transcription coactivator 1 (Crtc1). mRNA	0.101864	0.254773	0.200632	0.21869	0.250623	0.110782	4.01037	0.0202614	0.137526	0	0.217025	0.303968	0.185061	0.210148	0.0749634	0.0452488	0	0.0536813	0.109392	0
NM_001004066.3	Zfp386	zinc finger protein 386 (Kruppel-like) (Zfp386). transcript variant 1. mRNA	0.0523934	0.0519363	0.0433506	0.0669282	0.0335287	0	2.31419	0.0513627	0	0	0.112766	0.082377	0.043948	0	0.0807868	0	0	0	0	0
NM_001004139.2	Zfp619	zinc finger protein 619 (Zfp619). mRNA	0.0791047	0.0599192	0.0791885	0.108823	0	0	0.260777	0	0	0.0145121	0.0551755	0.0101827	0.0434597	0.0429874	0.001976	0.0143159	0	0	0.0315194	0
NM_001004140.2	Ckap2	cytoskeleton associated protein 2 (Ckap2). mRNA	0.0134674	0.0786943	0.0693343	0.0555805	0.0678695	0.0833337	2.47103	0.112508	0.300008	0.1084	0.008454	0.0858125	0	0.063232	0.0635952	0.11516	0.0479841	0.0906612	0.161931	0.0268894
NM_001004141.2	Cyp2j11	cytochrome P450. family 2. subfamily j. polypeptide 11 (Cyp2j11). mRNA	0	0	0	0	0	0	0.0418616	0	0	0	0	0	0	0	0	0	0	0	0	0
NM_001004142.2	Nlrp1a	NLR family. pyrin domain containing 1A (Nlrp1a). mRNA	0.0874625	0.15971	0.119607	0.155414	0.118355	0.0699051	1.10969	0	0.0730638	0.119588	0.0892199	0.116104	0	0.0898302	0.06146	0.0556469	0.0415503	0.0429325	0	0.0654864
NM_001004143.4	Usp22	ubiquitin specific peptidase 22 (Usp22). mRNA	0.660436	1.32766	0.903317	1.39943	0.792608	0.23666	16.4085	0.583498	0.553357	0.273423	1.28708	0.801672	0.901685	1.07836	0.7288	0.197479	0.252872	0.201286	0.219578	0.141705
NM_001004144.1	Git1	GIT ArfGAP 1 (Git1). transcript variant 1. mRNA	0	0	0.571236	0.134586	0	0	1.16254	0	0	0.0945541	0	0	0.268415	0	0	0.151573	0.0136029	0	0.114763	0
NM_001004145.3	Nlrp4g	NLR family. pyrin domain containing 4G (Nlrp4g). transcript variant 2. mRNA	0	0	0	0	0	0	0.009529	0	0	0	0	0	0	0	0	0	0	0	0	0
NM_001004147.3	Fbll1	fibrillarin-like 1 (Fbll1). mRNA	0	0	0	0	0	0	0	0	0	0	0	0	0	0	0	0	0	0	0	0
NM_001004148.4	Slc13a5	solute carrier family 13 (sodium-dependent citrate transporter). member 5 (Slc13a5). transcript variant 1. mRNA	0	0	0	0	0	0	0	0	0	0	0	0	0	0	0	0	0	0	0	0
NM_001004149.1	Zfp366	zinc finger protein 366 (Zfp366). mRNA	0.0565385	0.027531	0.0323419	0.0172842	0.007035	0.007774	0.0784779	0.0149946	0.003499	0.0194479	0.0670405	0	0	0.0147477	0	0.019185	0.004477	0.0176209	0.007951	0.0167239
NM_001004150.4	A4galt	alpha 1.4-galactosyltransferase (A4galt). transcript variant 2. mRNA	0	0	0	0	0	0	0	0	0	0	0	0	0	0	0	0	0	0	0	0
NM_001004151.2	Rtp1	receptor transporter protein 1 (Rtp1). mRNA	0	0	0	0	0	0	0	0	0	0	0	0	0	0	0	0	0	0	0	0
NM_001004152.3	Psg22	pregnancy-specific glycoprotein 22 (Psg22). mRNA	0	0	0	0	0	0	0	0.0111183	0.0103766	0	0.122812	0	0	0	0	0	0	0	0	0
NM_001004153.2	AU018091	expressed sequence AU018091 (AU018091). mRNA	0	0	0	0	0	0	0	0	0	0	0	0	0	0	0	0	0	0	0	0
NM_001004154.2	Rragb	Ras-related GTP binding B (Rragb). mRNA	0.0379427	0	0.122088	0.114833	0.0509903	0	1.27979	0.009057	0	0	0.0571645	0.0527489	0.0703537	0.0801666	0.0102384	0	0	0	0.0192092	0.010101
NM_001004155.2	9930012K11Rik	RIKEN cDNA 9930012K11 gene (9930012K11Rik). transcript variant 1. mRNA	0.0655478	0	0.033746	0	0.0293627	0.0216318	2.37466	0.0260759	0.0194691	0.0162338	0.0329181	0.151877	0	0.143621	0.0825404	0	0	0.009806	0	0
NM_001004157.2	Scarf1	scavenger receptor class F. member 1 (Scarf1). mRNA	0	0	0.0586226	0.158734	0	0.0225469	0.123282	0.0724771	0.0879349	0.0300809	0.129618	0.2568	0.0863305	0.103362	0	0.0296742	0.086551	0.0204412	0.0576476	0
NM_001004158.2	Gm5142	predicted gene 5142 (Gm5142). mRNA	0	0	0	0	0	0	0	0	0	0	0	0	0	0	0	0	0	0	0	0
NM_001004159.2	Clec4b2	C-type lectin domain family 4. member b2 (Clec4b2). mRNA	0	0	0	0	0.159695	0	0.314363	0.0900966	0.149487	0	0.0105313	0.0194356	0.0207377	0	0	0.0409868	0	0.009411	0	0.0223306
NM_001004164.3	Gnptab	N-acetylglucosamine-1-phosphate transferase. alpha and beta subunits (Gnptab). transcript variant 1. mRNA	0.457281	0.948142	0.291114	0.922188	0.304695	0.141985	10.8364	0.379475	0.392497	0	0.465055	0.516478	0.593628	1.19471	0.327275	0	0	0.0698793	0.319463	0.126536
NM_001004173.2	Sgpp2	sphingosine-1-phosphate phosphatase 2 (Sgpp2). mRNA	0	0	0.0620224	0.0632788	0.0122651	0.008132	0.684081	0.023527	0.009759	0	0	0.0228385	0.0162458	0	0.011821	0.002676	0.0124869	0	0.002772	0
NM_001004174.2	AA467197	expressed sequence AA467197 (AA467197). mRNA	0.0820986	0.119932	0.0352224	0.414118	0.919419	1.72723	9.31594	2.72711	5.83717	1.35552	0.39512	0.0634086	0.101485	0.41759	0.387682	0.601738	1.24807	2.54846	1.36815	0.619255
NM_001004176.2	Maml3	mastermind like transcriptional coactivator 3 (Maml3). mRNA	0.176112	0.288691	0.157457	0.44016	0.194216	0	0.654978	0.154024	0.209635	0.13318	0.769659	0.0716437	0.277524	0.280885	0.199518	0.0591207	0.0574792	0.0844677	0.149734	0.135999
NM_001004177.3	Celsr2	cadherin. EGF LAG seven-pass G-type receptor 2 (Celsr2). transcript variant 2. mRNA	0.0334052	0	0.069867	0	0.0149642	0.006201	0	0.007973	0	0.006205	0.0503283	0.0251554	0	0	0.009014	0.004081	0	0	0.012684	0.0122279
NM_001004178.1	Frg2f1	FSHD region gene 2 family member 1 (Frg2f1). mRNA	0.0638878	0.0666636	0.0822284	0.106722	0.0204422	0.02259	1.33969	0.0217847	0.0101657	0	0.080211	0.111023	0.0338461	0.144626	0.0184707	0	0	0	0.0346547	0
NM_001004180.1	Fam222a	family with sequence similarity 222. member A (Fam222a). mRNA	0.0709084	0.0517925	0.0248903	0.0310377	0.0288764	0	0.493238	0.0692387	0.00359	0	0.0404661	0.0560105	0.0358579	0.0529658	0.0521829	0	0	0.007233	0	0.00429
NM_001004182.4	Tmem178b	transmembrane protein 178B (Tmem178b). transcript variant 2. mRNA	0.0008843	0	0.009105	0.00365	0.001981	0.002189	0.0883758	0	0	0	0	0	0.004372	0.001038	0	0.00108	0	0	0	0.002354
NM_001004184.3	Slc28a1	solute carrier family 28 (sodium-coupled nucleoside transporter). member 1 (Slc28a1). mRNA	0	0	0	0	0	0	0.124928	0	0	0	0	0	0	0	0	0	0	0	0	0
NM_001004185.3	Whamm	WAS protein homolog associated with actin. golgi membranes and microtubules (Whamm). mRNA	0.345265	0.671108	0.422347	0.408242	0.111844	0	0	0.105568	0.514875	0	0.121804	0.41322	0.211634	0.0837337	0	0	0.0406669	0.19209	0.158906	0
NM_001004187.1	Rexo5	RNA exonuclease 5 (Rexo5). transcript variant 1. mRNA	0.009607	0.0491219	0.0309138	0.0396503	0	0.0178347	0.210035	0	0	0	0.0361864	0	0	0	0	0.0117362	0	0	0.00608	0.0255767
NM_001004190.3	Zfp560	zinc finger protein 560 (Zfp560). mRNA	0.0277595	0.0351449	0.128623	0	0	0.0137416	0.682005	0	0	0	0.0604101	0.0493118	0.0320269	0.136853	0.0449432	0	0	0	0	0
NM_001004191.3	Gm5617	predicted gene 5617 (Gm5617). mRNA	0.304357	0.848807	0.391731	0.723205	0.49578	0.205451	0.864125	0.264169	0.215729	0.171314	0.347382	0.416714	0.581443	0.779461	0.223982	0.135198	0.2366	0.15522	0.175098	0.0736592
NM_001004192.2	BC048562	cDNA sequence BC048562 (BC048562). mRNA	0	0	0	0	0	0	0	0	0	0	0	0	0	0	0	0	0	0	0	0
NM_001004193.3	Rhox8	reproductive homeobox 8 (Rhox8). mRNA	0.014571	0.085143	0.009377	0.12027	0.0326361	0.0270488	4.59618	0.0608639	0.0405741	0.0541306	0.0640287	0.0506425	0.0270177	0.0171034	0.0491476	0	0.0726827	0.0245226	0.0276632	0.0193953
NM_001004194.2	Nlrp4e	NLR family. pyrin domain containing 4E (Nlrp4e). mRNA	0	0	0	0	0	0	0	0	0	0	0	0	0	0	0	0	0	0	0	0
NM_001004293.2	Amigo1	adhesion molecule with Ig like domain 1 (Amigo1). transcript variant 2. mRNA	0.0252414	0	0.0324876	0.0998316	0.0353347	0.021476	0	0	0.0421719	0.0156284	0.0792264	0	0.066304	0.0648118	0	0.003854	0	0.00708	0.0259572	0.0042
NM_001004357.2	Cntnap2	contactin associated protein-like 2 (Cntnap2). transcript variant 1. mRNA	0	0	0.0321941	0.006882	0	0	0	0	0	0	0	0	0.003092	0	0	0	0	0	0	0
NM_001004359.2	Gprasp1	G protein-coupled receptor associated sorting protein 1 (Gprasp1). transcript variant 2. mRNA	0	0	0	0.0912186	0	0	2.12264	0.0377689	0	0.110103	0	0.261884	0.257075	0.297177	0.148425	0.0515456	0.0451031	0	0.0667579	0.0541606
NM_001004361.2	Tpgs2	tubulin polyglutamylase complex subunit 2 (Tpgs2). transcript variant 1. mRNA	0	0	0	0.149097	0	0	0	0.0103477	0	0	0.223159	0.0251123	0.0428717	0	0.137453	0	0	0	0	0
NM_001004362.2	2610008E11Rik	RIKEN cDNA 2610008E11 gene (2610008E11Rik). transcript variant 1. mRNA	0.285763	0.38115	0	0	0.0834848	0	2.35404	0.0889674	0.0830325	0	0.275581	0.208713	0.156144	0.140977	0.0838147	0	0	0	0	0
NM_001004363.2	Nuak1	NUAK family. SNF1-like kinase. 1 (Nuak1). mRNA	0.0248695	0	0.050014	0	0	0	0.354369	0.0445206	0.031163	0	0	0	0.126812	0.0437876	0	0	0	0	0	0
NM_001004364.2	Asap2	ArfGAP with SH3 domain. ankyrin repeat and PH domain 2 (Asap2). transcript variant 2. mRNA	0.11504	0.234814	0.0689616	0.255813	0.111184	0.0507065	1.70781	0.0733484	0.187813	0.0819606	0.21368	0.122321	0.151945	0.15723	0.0829202	0.0288759	0.0808536	0.0495072	0.0737984	0.184592
NM_001004365.2	Actr3b	ARP3 actin-related protein 3B (Actr3b). transcript variant 1. mRNA	0	0	0	0	0	0	0.858678	0	0	0	0.0566734	0	0.0659448	0	0	0	0	0	0	0
NM_001004366.2	Scube3	signal peptide. CUB domain. EGF-like 3 (Scube3). transcript variant 1. mRNA	0	0	0.003365	0	0.002928	0	0	0	0	0.003238	0	0	0	0	0	0	0.003726	0	0	0
NM_001004367.4	Cxxc4	CXXC finger 4 (Cxxc4). mRNA	0	0.004553	0.0100295	0	0	0	0	0	0	0	0	0	0	0	0	0	0	0	0.003945	0
NM_001004435.3	Pik3r6	phosphoinositide-3-kinase regulatory subunit 5 (Pik3r6). transcript variant 2. mRNA	0	0.015862	0.003494	0.0298749	0	0	0.296725	0	0	0.0974832	0	0.119505	0	0	0	0.0198963	0	0	0.151173	0
NM_001004436.4	Wapl	WAPL cohesin release factor (Wapl). transcript variant 1. mRNA	0.745	1.75094	1.35516	2.34474	0.855873	0.464393	20.4896	0.890755	1.27992	0.41872	1.80684	0.867875	1.10103	1.48435	0.81042	0.500372	0.203734	0.360876	0.697625	0.406178
NM_001004455.2	Cys1	cystin 1 (Cys1). transcript variant 2. mRNA	0	0	0	0	0	0	0	0	0	0	0	0	0	0	0	0	0	0	0	0
NM_001004468.3	Tacc2	transforming. acidic coiled-coil containing protein 2 (Tacc2). transcript variant 3. mRNA	0	0	0	0	0	0	0	0	0	0	0	0	0	0	0	0	0	0	0	0
NM_001004721.1	Pigu	phosphatidylinositol glycan anchor biosynthesis. class U (Pigu). mRNA	0.280921	0.836539	0.60493	0.646573	0.320653	0.167143	2.93573	0.141842	0.397141	0	0.529045	0.306677	0.460784	0.431204	0.167641	0	0	0.187901	0.0683758	0
NM_001004761.1	Gpr158	G protein-coupled receptor 158 (Gpr158). mRNA	0	0	0.0299807	0.003373	0	0	0	0	0	0	0	0	0	0	0	0	0	0	0	0
NM_001004762.3	Pla2g4c	phospholipase A2. group IVC (cytosolic. calcium-independent) (Pla2g4c). transcript variant 2. mRNA	0.010382	0.0227494	0	0	0	0.0128483	0.145907	0.021683	0	0	0.0325864	0.006014	0	0.006093	0	0.006341	0.007398	0.0116484	0	0.0207289
NM_001005223.3	Znhit3	zinc finger. HIT type 3 (Znhit3). transcript variant 1. mRNA	0.294796	0.35465	0.424064	0.512895	0.11652	0	2.43709	0.113825	0.270408	0.0644208	0.337459	0.441977	0.342973	0.295144	0.140377	0.201241	0.123571	0.116737	0.0987658	0.115412
NM_001005225.2	Olfr1197	olfactory receptor 1197 (Olfr1197). mRNA	0	0	0	0	0	0	0	0	0	0	0	0	0	0	0	0	0	0	0	0
NM_001005227.2	Olfr1200	olfactory receptor 1200 (Olfr1200). mRNA	0	0	0	0	0	0	0	0	0	0	0	0	0	0	0	0	0	0	0	0
NM_001005230.2	Olfr1024	olfactory receptor 1024 (Olfr1024). mRNA	0	0	0	0	0	0	0	0	0	0	0	0	0	0	0	0	0	0	0	0
NM_001005232.1	Dbx1	developing brain homeobox 1 (Dbx1). mRNA	0	0	0	0	0	0	0	0	0	0	0	0	0	0	0	0	0	0	0	0
NM_001005247.2	Hps5	HPS5. biogenesis of lysosomal organelles complex 2 subunit 2 (Hps5). transcript variant 1. mRNA	0.003628	0	0.399207	0	0.0629705	0	0	0	0	0	0.257331	0.0420272	0	0	0	0	0	0	0	0
NM_001005248.2	Hps5	HPS5. biogenesis of lysosomal organelles complex 2 subunit 2 (Hps5). transcript variant 2. mRNA	0.0729158	0	0	0.11034	0	0	0	0	0	0	0	0.004224	0	0	0	0	0	0	0	0
NM_001005341.3	Ypel2	yippee like 2 (Ypel2). mRNA	0.217947	0.25836	0.342596	0.548041	0.264085	0.114964	10.0092	0.370973	0.238776	0.190249	0.515864	0.34356	0.24733	0.192917	0.142205	0.113479	0.0814731	0.0881921	0.0904424	0.168832
NM_001005342.2	Ypel4	yippee like 4 (Ypel4). mRNA	0.174678	0	0.104918	0.0320401	0	0.417937	10.9835	0.764383	1.69917	0.0865226	0.0731027	0	0.259111	0.177698	0.0314231	0.398313	0.647268	0.561825	0.943295	0.20151
NM_001005343.2	Sp9	trans-acting transcription factor 9 (Sp9). mRNA	0	0	0	0	0	0	0.0583353	0	0	0	0	0	0	0	0	0	0	0	0	0
NM_001005358.2	Zfp960	zinc finger protein 960 (Zfp960). transcript variant 1. mRNA	0	0.162296	0.0168226	0.0943987	0	0.008088	1.39809	0.0116991	0	0	0	0.0151424	0	0	0.0176344	0	0.004657	0.0146648	0.0330857	0
NM_001005370.1	Spin2c	spindlin family. member 2C (Spin2c). mRNA	0.119145	0.212729	0.13631	0.0546352	0.0296512	0	0	0	0	0	0	0.0153369	0.0327289	0	0.0357221	0	0	0	0	0
NM_001005371.3	Pramel26	PRAME like 26 (Pramel26). transcript variant 1. mRNA	0	0	0	0	0	0	0	0	0	0	0	0	0	0	0	0	0	0	0	0
NM_001005385.1	Gprasp1	G protein-coupled receptor associated sorting protein 1 (Gprasp1). transcript variant 3. mRNA	0.253631	0.114522	0.332378	0.304507	0.161817	0.0228279	7.24905	0.13025	0.0273941	0	0	0.112192	0.0969071	0.0613465	0.215687	0	0	0.010348	0.0330741	0.0245531
NM_001005419.2	Ado	2-aminoethanethiol (cysteamine) dioxygenase (Ado). mRNA	0.243692	0.562697	0.333886	0.681298	0.187075	0.0486425	4.77512	0.0985077	0.0875585	0.0730083	0.424389	0.346072	0.301237	0.359862	0.254544	0.0432128	0.0504156	0.0749694	0.0746211	0.036623
NM_001005420.2	Ppp1r26	protein phosphatase 1. regulatory subunit 26 (Ppp1r26). transcript variant 2. mRNA	0.0109995	0	0	0	0	0	0	0	0	0	0	0	0	0.0442669	0	0	0	0	0	0
NM_001005421.4	Jaml	junction adhesion molecule like (Jaml). mRNA	0.800616	0.838359	1.60496	2.58778	5.38361	0.495406	3.75061	0.29172	1.37314	0.64486	1.49886	1.80581	0.884575	2.18307	1.44343	0.298597	0.388758	0.898277	0.798099	0.169756
NM_001005422.1	Stmnd1	stathmin domain containing 1 (Stmnd1). mRNA	0	0	0	0	0	0	0	0	0	0	0	0	0	0	0	0.0309178	0	0	0	0
NM_001005423.2	Mreg	melanoregulin (Mreg). transcript variant 1. mRNA	0.0210763	0.0513146	0.0180845	0.0483236	0.0708097	0.186929	0.658232	0.117382	0.211278	0.130495	0.0529225	0.0569736	0.0260532	0.0164928	0.009479	0.158768	0.160201	0.0670003	0.231189	0.144947
NM_001005424.2	Ajm1	apical junction component 1 (Ajm1). mRNA	0.003723	0.005439	0.0143765	0.005122	0	0.0115195	0.139539	0.004444	0.008294	0	0	0	0	0	0.0100468	0	0	0	0	0.009912
NM_001005425.2	Zfp663	zinc finger protein 663 (Zfp663). transcript variant 1. mRNA	0	0	0	0	0	0	0	0	0	0	0	0	0	0	0	0	0	0	0	0
NM_001005426.2	Zcwpw1	zinc finger. CW type with PWWP domain 1 (Zcwpw1). transcript variant 2. mRNA	0.0385609	0	0	0.0636569	0	0.0190886	0.264945	0.0460203	0	0	0.0871438	0.0536083	0.2288	0	0	0	0	0	0	0
NM_001005475.2	Iqsec2	IQ motif and Sec7 domain 2 (Iqsec2). transcript variant 2. mRNA	0	0.0884291	0	0.0948406	0.041428	0.0124857	1.12381	0	0.0262205	0.0333154	0.0548888	0.0915577	0.0457281	0.035527	0.0544473	0	0	0.0113196	0.0383078	0.0179056
NM_001005477.1	Barhl2	BarH like homeobox 2 (Barhl2). mRNA	0.00752	0.0219712	0.004839	0.005173	0.0294762	0	0.786784	0.004487	0	0.004656	0.009442	0	0.004648	0.008827	0.005073	0	0	0	0	0
NM_001005481.1	Olfr132	olfactory receptor 132 (Olfr132). mRNA	0	0	0	0	0	0	0	0	0	0	0	0	0	0	0	0	0	0	0	0
NM_001005485.2	Olfr111	olfactory receptor 111 (Olfr111). mRNA	0	0	0	0	0	0.0416428	0	0	0	0	0	0	0	0	0	0	0	0	0	0
NM_001005488.1	Olfr467	olfactory receptor 467 (Olfr467). mRNA	0	0	0	0	0	0	0	0	0	0	0	0	0	0	0	0	0	0	0	0
NM_001005506.3	Txlna	taxilin alpha (Txlna). transcript variant 1. mRNA	0.27518	0.149761	0.240748	0.363713	0.159122	0.0845814	10.0714	0.0665408	0.28046	0	0.0970979	0.181279	0.0733679	0.179447	0.177141	0.057124	0.0205063	0	0.0500805	0.131672
NM_001005507.2	Smg7	Smg-7 homolog. nonsense mediated mRNA decay factor (C. elegans) (Smg7). transcript variant 3. mRNA	0.827109	0.983217	0.621791	1.01438	0.586251	0.466449	19.3806	0.337366	1.05953	0.335234	1.46846	1.35849	0.534322	0.698736	0.770855	0.30695	0.417798	0.345693	0.829149	0.322522
NM_001005508.2	Arhgap30	Rho GTPase activating protein 30 (Arhgap30). mRNA	5.79734	10.9968	7.93656	10.0406	8.04755	2.36508	188.984	2.98308	3.92627	1.81818	9.24632	8.99786	6.56612	7.74412	5.33761	1.3191	2.13962	2.06793	3.48072	1.28483
NM_001005509.2	Eif2a	eukaryotic translation initiation factor 2A (Eif2a). mRNA	0.682623	1.22308	0.995086	1.12066	0.489935	0.275373	12.7796	0.387082	0.823336	0.308232	1.14587	1.26708	1.00232	0.903077	0.630951	0.198103	0.66112	0.253886	0.381868	0.150602
NM_001005510.2	Syne2	spectrin repeat containing. nuclear envelope 2 (Syne2). mRNA	0.104435	0.17141	0.156212	0.138676	0.132309	0.0439131	3.29937	0.13763	0.133389	0.0394461	0.161999	0.141077	0.0927096	0.107913	0.0924838	0.0206878	0.0373535	0.0316686	0.0505244	0.0150283
NM_001005511.4	Lmtk3	lemur tyrosine kinase 3 (Lmtk3). transcript variant 2. mRNA	0	0.005241	0.0184698	0	0	0.00888	0	0	0	0.004443	0.004504	0	0	0.004211	0	0	0	0.004025	0	0
NM_001005520.2	Olfr231	olfactory receptor 231 (Olfr231). mRNA	0	0	0	0	0	0	0	0	0	0	0	0	0	0	0	0	0	0	0	0
NM_001005524.2	Olfr194	olfactory receptor 194 (Olfr194). mRNA	0	0	0	0	0	0	0	0	0	0	0	0	0	0	0	0	0	0	0	0
NM_001005525.2	Rsrc2	arginine/serine-rich coiled-coil 2 (Rsrc2). transcript variant 1. mRNA	0.463428	0.431872	0.843281	0.736454	0.0894812	0.187877	0	0	0.525079	0.183045	0.601896	0.722025	0.587676	0.909742	0.646811	0.0390422	0.216362	0.0986126	0.262935	0.319067
NM_001005568.1	Olfr1281	olfactory receptor 1281 (Olfr1281). mRNA	0	0	0	0	0	0	0	0	0	0	0	0	0	0	0	0	0	0	0	0
NM_001005569.1	Olfr366	olfactory receptor 366 (Olfr366). mRNA	0	0	0	0	0	0	0	0	0	0	0	0	0	0	0	0	0	0	0	0
NM_001005570.2	Olfr707	olfactory receptor 707 (Olfr707). mRNA	0	0	0	0	0	0	0	0	0	0	0	0	0	0	0	0	0	0	0	0
NM_001005605.2	Aebp2	AE binding protein 2 (Aebp2). transcript variant 1. mRNA	0.341831	0.87638	0.392256	0.553346	0.299795	0.164797	3.62717	0.337506	0.24924	0.166598	0	0.450093	0.441217	0.0128912	0.0592698	0.0637259	0.154565	0.0646915	0.139003	0.0657841
NM_001005608.2	Itgb4	integrin beta 4 (Itgb4). transcript variant 1. mRNA	0	0.0249209	0	0.0430253	0	0	0	0	0	0	0.080318	0.0164698	0.005272	0	0	0	0	0	0	0.007569
NM_001005740.1	Phactr1	phosphatase and actin regulator 1 (Phactr1). transcript variant 2. mRNA	0	0.007173	0.008427	0	0	0	0	0	0	0	0	0	0	0	0	0	0	0	0	0
NM_001005748.2	Phactr1	phosphatase and actin regulator 1 (Phactr1). transcript variant 3. mRNA	0	0	0	0	0	0	0	0	0	0	0	0	0	0	0	0	0	0	0	0
NM_001005767.4	Parl	presenilin associated. rhomboid-like (Parl). mRNA; nuclear gene for mitochondrial product	0.834018	1.77919	0.758227	1.42052	0.719042	0.475115	10.6463	0.42658	1.03217	0.409833	1.32966	1.32664	1.23552	1.2509	0.616206	0.258747	0.924493	0.304491	0.670217	0.484589
NM_001005784.1	Patj	PATJ. crumbs cell polarity complex component (Patj). transcript variant 2. mRNA	0.0472652	0.0882258	0.0946305	0.0216739	0	0.0194978	1.88618	0	0.0350969	0	0.0692316	0.0547576	0.0194754	0.0801373	0.0531413	0	0.0149693	0	0	0
NM_001005787.1	Patj	PATJ. crumbs cell polarity complex component (Patj). transcript variant 4. mRNA	0.0664797	0.052972	0	0	0	0.0486156	0.519056	0.0216381	0	0	0	0.0525123	0	0	0.008154	0	0	0	0.0841414	0
NM_001005788.3	Zfp69	zinc finger protein 69 (Zfp69). transcript variant 1. mRNA	0	0.0913383	0.0710069	0.101193	0.0576648	0.0182067	0.459463	0.140461	0	0.0455446	0.101588	0	0.213683	0	0	0	0	0	0	0
NM_001005846.2	Mcoln2	mucolipin 2 (Mcoln2). transcript variant 2. mRNA	0.157882	0.199887	0.19869	0.487482	0.145378	0	3.39678	0.0753692	0	0.0564801	0.339178	0.170715	0.238534	0.267686	0.250881	0	0.230012	0.0314917	0.0621683	0
NM_001005847.2	Aga	aspartylglucosaminidase (Aga). transcript variant 1. mRNA	0.0268009	0.440454	0.206969	0.27652	0.150071	0	0.146478	0.0159927	0.119406	0	0.403782	0.294969	0.265037	0.0943762	0.180797	0.0163696	0	0.0902103	0	0
NM_001005854.2	Gm609	predicted gene 609 (Gm609). mRNA	0	0	0	0.0113544	0	0	0	0	0	0	0	0	0	0	0	0	0	0	0	0
NM_001005858.3	Ifit3b	interferon-induced protein with tetratricopeptide repeats 3B (Ifit3b). mRNA	0.0783057	0.190652	0.0727894	0.155601	0.233851	3.30564	2.94826	0.14018	4.40457	1.20132	0.196625	0.312476	0.118307	0.0970212	0.170212	1.09473	5.70403	2.74311	2.32356	3.78129
NM_001005859.3	Rpl34	ribosomal protein L34 (Rpl34). transcript variant 2. mRNA	2.31389	4.99229	4.16941	5.33793	2.77072	1.1234	6.00356	1.69938	2.02217	1.30042	2.99448	3.01062	2.72828	3.0921	1.72903	1.15238	1.42056	1.21819	0.923643	1.25569
NM_001005860.2	Clec4a4	C-type lectin domain family 4. member a4 (Clec4a4). mRNA	0.0474644	0.138675	0.0509086	0.0435305	0.168325	0.01958	0.098824	0.0472051	0.0264336	0	0.0397277	0.0641532	0	0.0928559	0.0320192	0.0193271	0	0.0177514	0	0
NM_001005863.2	Mtus1	mitochondrial tumor suppressor 1 (Mtus1). transcript variant 1. mRNA	0	0	0	0	0	0	0	0	0	0	0	0	0	0	0	0	0	0	0	0
NM_001005864.3	Mtus1	mitochondrial tumor suppressor 1 (Mtus1). transcript variant 3. mRNA	0	0	0	0	0	0	0	0	0	0	0	0	0	0	0	0	0	0	0	0
NM_001005865.3	Mtus1	mitochondrial tumor suppressor 1 (Mtus1). transcript variant 4. mRNA	0.80451	1.02796	1.47344	1.47085	3.88851	0.0363938	4.9136	0.213085	0.182493	0	1.59025	1.2922	0.895816	1.09966	1.48787	0.0615835	0	0.0565626	0.207371	0.0559202
NM_001005867.1	Zmiz2	zinc finger. MIZ-type containing 2 (Zmiz2). transcript variant 2. mRNA	0	0.210141	0.23357	0.280094	0	0.156113	1.61042	0.171678	0.46342	0	0.0889129	1.01274	0.0382996	0.6806	0.0597173	0.137876	0	0.059593	0.442564	0.141399
NM_001005868.2	Erbin	Erbb2 interacting protein (Erbin). transcript variant 1. mRNA	0.339843	0.546289	0.498201	0.532497	0.240991	0.282549	13.6092	0.0861277	0.362451	0.162484	0.423378	0.299466	0.249785	0.211004	0.33813	0.12823	0.129033	0.0441657	0.174377	0.068116
NM_001005916.2	Zbtb9	zinc finger and BTB domain containing 9 (Zbtb9). mRNA	0.45285	1.04021	0.711482	0.777646	0.51414	0.139141	7.12025	0.134181	0.226109	0.146961	0.752843	1.0348	0.7837	1.11443	0.551988	0.0534115	0.195845	0.147171	0.15416	0.0789853
NM_001006664.3	Epb41l1	erythrocyte membrane protein band 4.1 like 1 (Epb41l1). transcript variant 3. mRNA	0	0	0	0	0	0	0	0	0	0	0	0	0	0	0	0	0	0	0	0
NM_001006668.2	Kcnq2	potassium voltage-gated channel. subfamily Q. member 2 (Kcnq2). transcript variant 4. mRNA	0	0	0	0	0	0	0	0	0	0	0	0	0	0	0	0	0	0	0	0
NM_001006669.2	Kcnq2	potassium voltage-gated channel. subfamily Q. member 2 (Kcnq2). transcript variant 5. mRNA	0	0	0	0.008126	0	0	0	0	0	0	0	0	0	0	0	0	0	0	0	0
NM_001006674.2	Kcnq2	potassium voltage-gated channel. subfamily Q. member 2 (Kcnq2). transcript variant 6. mRNA	0	0	0	0	0	0	0	0	0	0	0	0	0	0	0	0	0	0	0	0
NM_001007077.2	Pramel25	PRAME like 25 (Pramel25). transcript variant 1. mRNA	0	0	0	0.0131089	0	0	0	0	0	0	0	0	0	0	0	0	0	0	0	0
NM_001007154.3	Phactr3	phosphatase and actin regulator 3 (Phactr3). transcript variant 2. mRNA	0.0113166	0.005511	0.0315583	0.0207574	0.0337959	0	0.188496	0.006753	0	0	0.007104	0	0.009326	0.002214	0.007634	0	0	0	0	0.005021
NM_001007220.3	Adam22	a disintegrin and metallopeptidase domain 22 (Adam22). transcript variant 1. mRNA	0	0	0	0	0	0	0	0	0	0	0	0	0	0	0	0	0	0	0	0
NM_001007221.3	Adam22	a disintegrin and metallopeptidase domain 22 (Adam22). transcript variant 2. mRNA	0	0	0	0.0175358	0	0	0	0	0	0	0	0	0	0	0	0	0	0	0	0
NM_001007222.3	Tdpoz2	TD and POZ domain containing 2 (Tdpoz2). mRNA	0	0	0	0	0	0	0	0	0	0.009471	0	0	0	0	0	0	0	0	0	0
NM_001007223.3	Clec3a	C-type lectin domain family 3. member a (Clec3a). mRNA	0	0	0	0	0	0	0	0	0	0	0	0	0	0	0	0	0	0	0	0
NM_001007266.1	Taar2	trace amine-associated receptor 2 (Taar2). mRNA	0	0	0	0	0	0	0	0	0	0	0	0	0	0	0	0	0	0	0	0
NM_001007268.1	Dusp13	dual specificity phosphatase 13 (Dusp13). transcript variant 1. mRNA	0	0	0	0	0	0	0	0.005989	0	0	0	0	0	0	0	0	0	0	0	0
NM_001007460.2	Zdhhc23	zinc finger. DHHC domain containing 23 (Zdhhc23). transcript variant 1. mRNA	0	0.0676287	0	0	0	0	0	0	0	0	0	0	0	0	0	0	0	0	0	0
NM_001007461.2	Gsdma3	gasdermin A3 (Gsdma3). mRNA	0	0.0290744	0	0.005476	0.008916	0	0.410243	0.004751	0	0	0	0.004612	0.019682	0	0	0	0	0.008932	0	0.005298
NM_001007462.1	Pabpn1l	poly(A)binding protein nuclear 1-like (Pabpn1l). mRNA	0.007655	0	0.0197048	0	0.008573	0	0.191256	0	0	0	0.0192214	0	0.018925	0.0269558	0	0	0	0	0	0
NM_001007463.2	Spag8	sperm associated antigen 8 (Spag8). transcript variant 2. mRNA	0.0130509	0	0	0	0	0	0.387214	0.0155756	0	0	0.0163855	0.0377995	0	0	0.0176082	0.0159427	0	0	0	0
NM_001007465.3	Rffl	ring finger and FYVE like domain containing protein (Rffl). transcript variant 1. mRNA	0.447101	0.992477	0.417927	0.625376	0.525882	0.386393	0	0.232514	1.21856	0.40828	0.341819	0.477463	0.450788	0.577579	0.208937	0.213585	0.131713	0.510047	0.486849	0.425568
NM_001007472.2	Noto	notochord homeobox (Noto). mRNA	0	0	0	0	0	0	0	0	0	0	0	0	0	0	0	0	0	0	0	0
NM_001007567.2	Slc7a6os	solute carrier family 7. member 6 opposite strand (Slc7a6os). transcript variant 1. mRNA	0.677605	0.973087	0.739093	0.892668	0.688108	0.355329	21.1802	0.178184	0.217467	0.355547	0.475834	0.578785	0.936992	0.849293	0.294408	0	0.589251	0.115972	0.363401	0.244597
NM_001007568.2	Zfp251	zinc finger protein 251 (Zfp251). mRNA	0.289082	0.673494	0.413768	0.545101	0.184198	0.0339252	2.29599	0.110044	0.116582	0.0555478	0.375457	0.539893	0.480568	0.383201	0.231998	0.0304427	0.0603788	0.0726979	0.0820082	0.0331718
NM_001007569.2	Pnmal1	PNMA-like 1 (Pnmal1). mRNA	0	0	0.0164703	0.0234721	0	0	0	0.005091	0	0	0	0	0.007909	0	0	0	0	0	0	0
NM_001007570.2	Slc25a42	solute carrier family 25. member 42 (Slc25a42). mRNA; nuclear gene for mitochondrial product	0.170684	0.269448	0.223226	0.31055	0.231228	0.0476975	7.28232	0.147848	0.168648	0.0681809	0.338722	0.264717	0.306274	0.34253	0.289713	0.0538073	0.0823935	0.0710419	0.0487809	0.0403088
NM_001007571.2	D8Ertd738e	DNA segment. Chr 8. ERATO Doi 738. expressed (D8Ertd738e). mRNA	3.53383	8.66666	4.7143	5.5711	5.82073	1.34073	88.735	2.5089	2.31281	1.35752	6.89796	6.26055	3.82625	6.32796	4.08916	0.882273	1.28667	1.21551	1.55074	0.858363
NM_001007572.2	Trpv5	transient receptor potential cation channel. subfamily V. member 5 (Trpv5). mRNA	0	0	0	0	0	0	0.0420601	0	0.0075	0	0	0	0	0	0.009085	0.0246772	0	0	0	0
NM_001007573.3	Maneal	mannosidase. endo-alpha-like (Maneal). mRNA	0.0128452	0.065676	0	0	0.0107889	0.0317933	0.952771	0.0191625	0	0	0.0483813	0.0892882	0.039696	0.0527716	0.0389936	0	0	0	0	0
NM_001007575.2	Zfp58	zinc finger protein 58 (Zfp58). mRNA	0.159222	0.508464	0.409861	0.453357	0.095376	0.0641546	4.23253	0.0530294	0.0948593	0.0183411	0.306827	0.248808	0.219706	0.352055	0.174853	0	0.0422179	0.0664721	0.0796716	0.0394303
NM_001007576.2	Gucy2f	guanylate cyclase 2f (Gucy2f). mRNA	0.003504	0.003839	0.001127	0.001205	0	0	0.13404	0.001045	0	0	0	0	0	0.002056	0	0	0	0	0	0
NM_001007577.2	Tceanc	transcription elongation factor A (SII) N-terminal and central domain containing (Tceanc). mRNA	0.1207	0.214104	0	0.225345	0.072413	0	4.15999	0	0.115233	0	0.243544	0.0824015	0.005329	0.189745	0	0.0315951	0.0368614	0	0.0518313	0
NM_001007578.2	Armcx6	armadillo repeat containing. X-linked 6 (Armcx6). mRNA	0.241102	0.333341	0.288152	0.752202	0.376085	0.372974	0.443724	0.256913	0.417207	0.234584	1.01081	0.339177	0.18095	0.26279	0.267204	0.194597	0.269985	0.207715	0.299707	0.366775
NM_001007579.3	Pramel20	PRAME like 20 (Pramel20). mRNA	0	0	0	0	0	0	0	0	0	0	0	0	0	0	0	0	0	0	0	0
NM_001007580.1	Fndc3c1	fibronectin type III domain containing 3C1 (Fndc3c1). mRNA	0	0	0	0	0	0	0	0	0	0	0	0	0	0	0	0	0	0	0	0
NM_001007581.1	Trp53rka	transformation related protein 53 regulating kinase A (Trp53rka). mRNA	0.398897	0.935063	0.459682	0.587039	0.399973	0.200908	3.80982	0.110712	0.206653	0.241237	0.524109	0.687822	0.573363	0.816669	0.337931	0.0736591	0.231368	0.119695	0.129154	0.0864364
NM_001007582.3	Defa39	defensin. alpha. 39 (Defa39). mRNA	0	0	0	0	0	0	0	0	0	0	0	0	0	0	0	0	0	0	0	0
NM_001007583.1	Best3	bestrophin 3 (Best3). mRNA	0	0	0	0	0	0	0	0	0	0	0	0	0	0	0	0	0	0	0	0
NM_001007584.2	Gm11541	predicted gene 11541 (Gm11541). mRNA	0	0	0	0	0	0	0.211508	0.0124345	0	0	0.0130811	0	0	0.006115	0	0	0	0	0	0
NM_001007589.3	Akirin2	akirin 2 (Akirin2). mRNA	0.602721	1.18383	0.788786	0.898827	0.340329	0.225652	3.84381	0.25992	0.321561	0.232061	0.623178	1.16182	0.563481	1.00473	0.574012	0.25986	0.0866211	0	0.0641048	0.52586
NM_001007596.2	Rtn1	reticulon 1 (Rtn1). transcript variant 2. mRNA	0	0	0.327016	0.0854402	0	0	0	0	0	0	0	0	0.0697943	0	0	0	0	0	0.107193	0
NM_001008230.3	Rtp2	receptor transporter protein 2 (Rtp2). mRNA	0	0	0	0	0	0	0	0	0	0	0	0	0	0	0	0	0	0	0	0
NM_001008231.2	Daam2	dishevelled associated activator of morphogenesis 2 (Daam2). transcript variant 1. mRNA	0	0	0	0	0	0	0	0	0	0	0	0	0	0	0	0	0	0	0	0
NM_001008232.2	Asap3	ArfGAP with SH3 domain. ankyrin repeat and PH domain 3 (Asap3). transcript variant 1. mRNA	0	0	0	0	0	0	0.298875	0	0	0	0	0	0	0.0128904	0	0	0	0	0.0337555	0
NM_001008233.3	Plekhn1	pleckstrin homology domain containing. family N member 1 (Plekhn1). transcript variant 1. mRNA	0.0634004	0.248909	0.0459007	0.299814	0.239631	0.205962	12.4744	0.0472905	0.18537	0	0.258697	0.201989	0	0.0372096	0.213847	0	0	0.124485	0.0300915	0
NM_001008238.3	Bnip2	BCL2/adenovirus E1B interacting protein 2 (Bnip2). transcript variant alpha. mRNA	0.212479	0.317047	0.226595	0.3445	0.382427	0.0863998	5.20921	0.16664	0.0642379	0.0676586	0.23628	0.232095	0.181982	0.20487	0.204767	0.025956	0.0324454	0.0340569	0.049944	0.0767677
NM_001008419.2	Aox2	aldehyde oxidase 2 (Aox2). mRNA	0	0	0	0.005045	0	0	0	0	0	0	0	0	0	0	0	0	0	0	0	0
NM_001008420.2	Cdh12	cadherin 12 (Cdh12). mRNA	0	0	0.007957	0	0	0	0	0	0	0	0	0	0	0.003628	0	0	0	0	0	0
NM_001008421.1	Nol10	nucleolar protein 10 (Nol10). mRNA	0.215723	0.681371	0.435238	0.565458	0.329734	0.458179	11.1073	0	0.776035	0.285183	0.36234	0.303956	0.331528	0.407197	0.220254	0.356111	0.652285	0.313994	0.498103	0.434599
NM_001008422.1	Scaf1	SR-related CTD-associated factor 1 (Scaf1). mRNA	0.697235	0.750182	0.806043	0.847172	0.51432	0.0981709	1.7342	0.201799	0.472006	0.423944	0.906828	0.597356	0.676085	1.04629	0.842123	0.158105	0	0	0.240433	0.175057
NM_001008423.2	Ccdc177	coiled-coil domain containing 177 (Ccdc177). mRNA	0	0	0.005124	0	0	0	0	0	0	0	0	0	0	0	0	0	0	0	0	0
NM_001008424.2	Cdsn	corneodesmosin (Cdsn). transcript variant 1. mRNA	0	0	0	0	0	0	0	0	0	0	0	0	0	0	0	0	0	0	0	0
NM_001008425.2	Thoc6	THO complex 6 (Thoc6). transcript variant 1. mRNA	0.208236	0.723497	0.268016	0.735522	0.0756335	0	6.38039	0	0.514029	0.153324	0.508749	0.221686	0.236538	0.40958	0.349289	0.0756254	0.505322	0	0	0.112371
NM_001008426.3	Teddm1b	transmembrane epididymal protein 1B (Teddm1b). mRNA	0.031189	0.0303745	0.0178412	0.0429061	0.0388094	0.0171548	1.20135	0.0248149	0.00772	0	0.0130526	0.0321183	0.0128513	0.0162709	0	0	0.009878	0	0	0
NM_001008427.1	Zfp975	zinc finger protein 975 (Zfp975). mRNA	0	0.0808133	0.0284805	0.0380514	0	0	0.129578	0	0	0	0	0.0256358	0	0	0.0335867	0	0	0	0	0
NM_001008428.3	Fbxw20	F-box and WD-40 domain protein 20 (Fbxw20). mRNA	0	0	0	0	0	0	0	0	0	0	0	0	0	0	0	0	0	0	0	0
NM_001008429.1	Taar3	trace amine-associated receptor 3 (Taar3). mRNA	0	0	0	0	0	0	0	0	0	0	0	0	0	0	0	0	0	0	0	0
NM_001008497.2	P2ry14	purinergic receptor P2Y. G-protein coupled. 14 (P2ry14). transcript variant 2. mRNA	0	0	0	0	0	0.0598099	0	0.0576777	0.253001	0	0	0	0	0	0	0.0236149	0.0551022	0	0.079519	0.141526
NM_001008498.2	Wdr34	WD repeat domain 34 (Wdr34). mRNA	0.082159	0.2471	0.143067	0.146267	0.0920096	0.0956958	6.86757	0.0807488	0.0807451	0.0658311	0.151692	0.134376	0.137405	0.153166	0.0326023	0.0354224	0.0895412	0.0216896	0.0734021	0.0900618
NM_001008499.1	Taar4	trace amine-associated receptor 4 (Taar4). mRNA	0	0	0	0	0	0	0	0	0	0	0	0	0	0	0	0	0	0	0	0
NM_001008501.2	Zfp760	zinc finger protein 760 (Zfp760). mRNA	0	0.0851026	0	0.0915909	0	0.00515	0	0	0.0231742	0.0154585	0.125384	0	0.0977319	0.153857	0	0	0	0.0140063	0.0210667	0.008308
NM_001008502.2	Bbs12	Bardet-Biedl syndrome 12 (human) (Bbs12). transcript variant 1. mRNA	0.120887	0.337608	0.173895	0.308147	0.055745	0	0	0	0	0	0.183021	0	0	0	0	0.0217165	0	0	0.0360007	0
NM_001008506.2	Zc3h14	zinc finger CCCH type containing 14 (Zc3h14). transcript variant 2. mRNA	0.274095	0.566229	0.409796	0.205672	0.186035	0.0342635	1.33159	0.360158	0.231284	0.239991	0.399742	0.339997	0.369621	0.415976	0.231595	0.216454	0	0	0.0630752	0.19532
NM_001008533.3	Adora1	adenosine A1 receptor (Adora1). transcript variant 2. mRNA	0	0	0.0386197	0	0	0	0	0	0	0	0	0	0	0	0	0	0	0	0	0
NM_001008542.3	Mxi1	MAX interactor 1. dimerization protein (Mxi1). transcript variant 2. mRNA	2.96663	1.25552	1.37953	1.83514	2.22231	1.66321	3.21272	1.49303	2.70185	1.70121	1.94979	3.00248	2.7032	5.8738	2.60567	2.07952	2.04779	1.29566	3.98997	2.76065
NM_001008543.3	Mxi1	MAX interactor 1. dimerization protein (Mxi1). transcript variant 3. mRNA	10.9057	10.758	13.3118	20.2415	12.0017	8.3207	12.5294	8.04619	6.39952	8.65148	21.966	15.2696	11.773	10.3748	8.37651	3.87809	2.418	6.18867	4.53851	8.1951
NM_001008545.2	Tardbp	TAR DNA binding protein (Tardbp). transcript variant 2. mRNA	0	0	0	0.0406933	0.0873352	0	0	0	0	0	0	0.0436159	0	0	0	0	0	0	0	0
NM_001008546.2	Tardbp	TAR DNA binding protein (Tardbp). transcript variant 4. mRNA	0	0.0537594	0	0	0.087005	0.030362	0.655538	0	0	0	0	0	0.0572846	0.0159987	0	0	0	0	0	0
NM_001008547.1	1700001J03Rik	RIKEN cDNA 1700001J03 gene (1700001J03Rik). mRNA	0	0	0.0557978	0	0	0	0.0338484	0	0	0	0	0	0	0	0	0	0	0	0	0
NM_001008548.4	Pde2a	phosphodiesterase 2A. cGMP-stimulated (Pde2a). transcript variant 2. mRNA	0	0	0	0	0.0419507	0	0.0129988	0	0	0	0.148929	0	0.0874651	0	0	0	0	0	0	0
NM_001008549.2	Zfp658	zinc finger protein 658 (Zfp658). mRNA	0.352256	0.442695	0.366705	0.356317	0.21755	0.121806	1.38325	0.0463674	0.0634689	0.0673551	0.396731	0.366086	0.214517	0.136812	0.209673	0.0442963	0.0221485	0.0145303	0.05573	0.0689534
NM_001008550.1	Zfyve26	zinc finger. FYVE domain containing 26 (Zfyve26). mRNA	0.271091	0.383728	0.54503	0.581263	0.149703	0.300786	8.42558	0.166229	0.512273	0.172479	0.395516	0.23609	0.242663	0.27651	0	0.0970637	0.002665	0.0597831	0.326549	0.0734135
NM_001008700.4	Il4ra	interleukin 4 receptor. alpha (Il4ra). transcript variant 1. mRNA	1.93808	2.40253	2.25292	3.49935	4.29122	1.38082	37.7182	2.37	4.98057	1.14082	3.20222	3.06753	1.52475	3.64066	1.31202	1.24419	2.12509	1.98882	1.85268	0.847049
NM_001008702.2	Dab2	disabled 2. mitogen-responsive phosphoprotein (Dab2). transcript variant 2. mRNA	0	0.0404834	0	0.0190618	0	0	0	0.0275612	0	0	0	0	0	0.0162645	0	0	0	0	0.008769	0
NM_001008705.2	Bud31	BUD31 homolog (Bud31). transcript variant 3. mRNA	0.0700575	0.034114	0.0901693	0.192753	0	0	0.437593	0.111479	0.130054	0	0	0.0541087	0.0288669	0.150761	0	0	0.0332818	0.340614	0	0
NM_001008706.2	Calm5	calmodulin 5 (Calm5). mRNA	0	0	0	0	0	0	0	0	0	0	0	0	0	0	0	0	0	0	0	0
NM_001008785.5	Kbtbd8	kelch repeat and BTB (POZ) domain containing 8 (Kbtbd8). transcript variant 1. mRNA	0.0814278	0.21898	0.166733	0.259679	0.0373053	0.0274832	1.33511	0.004417	0.0494709	0	0.130114	0.0857597	0.100656	0.119474	0	0.0226068	0	0	0	0
NM_001008791.2	Whrn	whirlin (Whrn). transcript variant 2. mRNA	0	0	0	0	0	0	0	0	0.066792	0	0.0268883	0	0	0	0	0	0	0	0	0
NM_001008792.2	Whrn	whirlin (Whrn). transcript variant 3. mRNA	0	0	0.0221655	0.0592285	0	0	1.82196	0	0	0.005331	0	0	0.0372545	0	0	0	0	0	0	0
NM_001008793.2	Whrn	whirlin (Whrn). transcript variant 4. mRNA	0	0	0	0	0.004839	0	0.0674798	0	0	0.0214047	0.0678179	0.085108	0	0	0.0291514	0.0263942	0.0461904	0.0484846	0	0.005752
NM_001008973.2	Tmem232	transmembrane protein 232 (Tmem232). transcript variant 3. mRNA	0	0	0	0	0	0	0	0	0	0	0	0	0	0	0	0	0	0	0	0
NM_001009545.1	Adam6b	a disintegrin and metallopeptidase domain 6B (Adam6b). mRNA	0.0269926	0.067597	0.12904	0.0848759	0.008637	0	1.69806	0.0368162	0	0	0.0677785	0.062543	0.0333667	0.0543152	0.062431	0	0	0	0	0
NM_001009546.2	Naaladl1	N-acetylated alpha-linked acidic dipeptidase-like 1 (Naaladl1). mRNA	0.0130267	0.0428169	0.0880232	0.0761622	0.0291771	0.008061	8.91988	0.0855063	0.0798023	0.0120984	0.0449762	0.135825	0.0161028	0.0649853	0.0703017	0.0358044	0.0696206	0.0876942	0.0783156	0.0433491
NM_001009547.2	Adam26b	a disintegrin and metallopeptidase domain 26B (Adam26b). mRNA	0	0	0	0	0	0	0	0	0	0	0	0	0	0	0	0	0	0	0	0
NM_001009548.2	Adam20	a disintegrin and metallopeptidase domain 20 (Adam20). mRNA	0	0	0	0	0	0	0	0	0	0	0	0	0	0	0	0	0	0	0	0
NM_001009549.2	Zfp36l3	zinc finger protein 36. C3H type-like 3 (Zfp36l3). mRNA	0	0	0	0	0	0	0.0104667	0	0	0	0	0	0	0	0	0	0	0	0	0
NM_001009550.2	Mup21	major urinary protein 21 (Mup21). mRNA	0	0	0	0	0	0	0	0	0	0	0	0	0	0	0	0	0	0	0	0
NM_001009573.2	Unc13d	unc-13 homolog D (Unc13d). mRNA	0.163356	0	0	0.537517	0.773792	0.21309	9.83812	0.318779	0.149986	0.177684	0.964491	1.01019	0.698569	0.230614	1.13177	0	0	0	0.30175	0
NM_001009574.1	Taar5	trace amine-associated receptor 5 (Taar5). mRNA	0	0	0	0	0	0	0	0	0	0	0	0	0	0	0	0	0	0	0	0
NM_001009575.5	Armcx5	armadillo repeat containing. X-linked 5 (Armcx5). mRNA	0.197693	0.392581	0.33396	0.43344	0.245611	0.0573415	15.31	0.254368	0.230518	0.0573766	0.329645	0.239767	0.351291	0.420593	0.162535	0.0754678	0.0968517	0.0901095	0.0899208	0.0698983
NM_001009818.2	Septin11	septin 11 (Septin11). transcript variant 3. mRNA	0.495052	1.09095	1.06122	1.4899	0.78336	0.407741	11.7514	0.334729	0.775353	0.359868	1.05004	1.11965	1.0422	0.86866	0.788735	0.212589	0.260064	0.254024	0.493988	0.233896
NM_001009819.2	A3galt2	alpha 1.3-galactosyltransferase 2 (isoglobotriaosylceramide synthase) (A3galt2). mRNA	0	0	0	0.0106611	0.0115718	0.0223784	0.613146	0	0	0	0.0291893	0.0179564	0.003193	0	0	0.0189337	0	0.002898	0	0
NM_001009927.2	Mief2	mitochondrial elongation factor 2 (Mief2). mRNA; nuclear gene for mitochondrial product	0.208342	0.613692	0.347278	0.498046	0.298345	0.0591754	7.69073	0.175274	0.121735	0.101505	0.325894	0.455038	0.303981	0.420948	0.267268	0.0250333	0.0389412	0.126458	0.0951021	0.0227312
NM_001009929.3	Brsk2	BR serine/threonine kinase 2 (Brsk2). transcript variant 2. mRNA	0	0.0123542	0	0.0116341	0	0	0	0	0	0	0	0	0	0	0	0	0	0	0	0
NM_001009930.3	Brsk2	BR serine/threonine kinase 2 (Brsk2). transcript variant 3. mRNA	0	0	0	0.005346	0	0	0	0	0	0	0	0	0	0	0	0	0	0	0	0
NM_001009935.2	Txnip	thioredoxin interacting protein (Txnip). transcript variant 1. mRNA	13.8939	17.5289	18.6793	21.591	21.3509	3.26171	262.315	12.7758	8.19393	2.95785	19.8068	15.9334	16.769	12.2058	8.8497	3.41054	5.82371	5.16	4.24197	1.11114
NM_001009940.2	Il19	interleukin 19 (Il19). transcript variant 1. mRNA	0	0	0	0	0	0	0	0	0	0	0	0	0	0	0	0	0	0	0	0
NM_001009947.3	Dock11	dedicator of cytokinesis 11 (Dock11). mRNA	1.64501	3.04415	2.33879	3.11254	1.60828	0.169108	30.8047	0.835783	0.709782	0.335169	2.68391	2.07779	1.75573	2.30259	1.05653	0.253596	0.234071	0.290413	0.342573	0.155654
NM_001009948.2	Nrsn2	neurensin 2 (Nrsn2). transcript variant 1. mRNA	0	0	0.0475577	0	0	0	0	0	0	0	0	0	0	0	0	0	0	0	0	0
NM_001009949.3	Slc25a51	solute carrier family 25. member 51 (Slc25a51). mRNA	14.1027	18.7308	11.5734	14.2947	13.7892	5.93647	51.0817	9.38206	20.8267	15.0274	14.0393	18.4436	21.0965	20.7806	14.866	8.94276	19.3312	17.014	13.4588	15.3547
NM_001009950.1	Slc38a8	solute carrier family 38. member 8 (Slc38a8). mRNA	0	0	0	0	0	0	0	0	0	0	0	0	0	0	0	0	0	0	0	0
NM_001009951.1	Cep44	centrosomal protein 44 (Cep44). mRNA	0.146666	0.0892724	0.18877	0.10929	0.102657	0.0302513	3.51174	0.0510526	0.0272268	0.0378373	0.199484	0.311512	0.249287	0.301273	0.23086	0.0373258	0.139351	0.150844	0.170162	0.0406719
NM_001009952.2	Scgb2b20	secretoglobin. family 2B. member 20 (Scgb2b20). mRNA	0	0	0	0	0	0	0	0	0	0	0	0	0	0	0	0	0	0	0	0
NM_001009978.1	Pde1a	phosphodiesterase 1A. calmodulin-dependent (Pde1a). transcript variant 7. mRNA	0	0	0.0482558	0	0	0	0	0	0	0	0	0	0	0	0.0289054	0	0	0	0	0
NM_001009979.1	Pde1a	phosphodiesterase 1A. calmodulin-dependent (Pde1a). transcript variant 9. mRNA	0	0	0	0	0	0	0	0	0	0	0	0	0	0	0	0	0	0	0	0
NM_001009981.2	Slc10a7	solute carrier family 10 (sodium/bile acid cotransporter family). member 7 (Slc10a7). transcript variant c. mRNA	0	0	0	0.0575281	0.0330578	0	0.284251	0	0.101376	0	0	0	0	0	0	0	0	0	0	0
NM_001010825.3	Ficd	FIC domain containing (Ficd). mRNA	0.13443	0.296574	0.208333	0.245319	0.10139	0.0407427	2.79322	0.0687579	0.0488923	0.0203838	0.144666	0.241557	0.183131	0.170675	0.007403	0	0	0.0307813	0.0243064	0.0584289
NM_001010826.3	Kctd14	potassium channel tetramerisation domain containing 14 (Kctd14). transcript variant 3. mRNA	0	0.0883019	0.0923866	0.0727606	0	0	0	0	0.0799509	0	0.118579	0.100666	0	0	0	0	0	0	0.0286895	0
NM_001010827.1	Taar7b	trace amine-associated receptor 7B (Taar7b). mRNA	0	0	0	0	0	0	0	0	0	0	0	0	0	0	0	0	0	0	0	0
NM_001010828.1	Taar6	trace amine-associated receptor 6 (Taar6). mRNA	0	0	0	0	0	0	0	0	0	0	0	0	0	0	0	0	0	0	0	0
NM_001010829.1	Taar7a	trace amine-associated receptor 7A (Taar7a). mRNA	0	0	0	0	0	0	0	0	0	0	0	0	0	0	0	0	0	0	0	0
NM_001010830.1	Taar8a	trace amine-associated receptor 8A (Taar8a). mRNA	0	0	0	0	0	0	0	0	0	0	0	0	0	0	0	0	0	0	0	0
NM_001010831.1	Taar9	trace amine-associated receptor 9 (Taar9). mRNA	0	0	0	0	0	0	0	0	0	0	0	0	0	0	0	0	0	0	0	0
NM_001010833.2	Mdc1	mediator of DNA damage checkpoint 1 (Mdc1). mRNA	0.190064	0.317563	0.226279	0.308857	0	0	2.09982	0.109162	0.104526	0	0	0.821594	0	0	0	0	0	0	0	0
NM_001010834.2	Slc10a5	solute carrier family 10 (sodium/bile acid cotransporter family). member 5 (Slc10a5). mRNA	0.004465	0	0.0229848	0	0	0	0.0278864	0	0	0	0	0	0	0	0	0	0	0	0	0
NM_001010835.1	Taar7e	trace amine-associated receptor 7E (Taar7e). mRNA	0	0	0	0	0	0	0	0	0	0	0	0	0	0	0	0	0	0	0	0
NM_001010836.3	Ppp1r13l	protein phosphatase 1. regulatory subunit 13 like (Ppp1r13l). mRNA	0	0	0	0	0	0	0	0	0	0	0	0	0	0	0	0	0	0	0	0
NM_001010837.1	Taar8b	trace amine-associated receptor 8B (Taar8b). mRNA	0	0	0	0	0	0	0	0	0	0	0	0	0	0	0	0	0	0	0	0
NM_001010838.1	Taar7d	trace amine-associated receptor 7D (Taar7d). mRNA	0	0	0	0	0	0	0	0	0	0	0	0	0	0	0	0	0	0	0	0
NM_001010839.1	Taar7f	trace amine-associated receptor 7F (Taar7f). mRNA	0	0	0	0	0	0	0	0	0	0	0	0	0	0	0	0	0	0	0	0
NM_001010840.2	Taar8c	trace amine-associated receptor 8C (Taar8c). mRNA	0	0	0	0	0	0	0	0	0	0	0	0	0	0	0	0	0	0	0	0
NM_001010930.1	Mrps33	mitochondrial ribosomal protein S33 (Mrps33). transcript variant 2. mRNA; nuclear gene for mitochondrial product	0.0370675	0.162447	0.155053	0	0.0830234	0	0.115765	0	0	0	0.0814418	0.0858868	0	0.0435096	0.0500109	0.113202	0	0	0	0.04934
NM_001010937.2	Gjb6	gap junction protein. beta 6 (Gjb6). transcript variant 2. mRNA	0	0	0	0	0	0	0	0	0	0	0	0	0	0	0	0	0	0	0	0
NM_001010941.2	Gpr12	G-protein coupled receptor 12 (Gpr12). transcript variant 1. mRNA	0	0	0	0	0	0	0	0	0	0	0	0	0	0	0	0	0	0	0	0
NM_001010973.2	Hrh2	histamine receptor H2 (Hrh2). transcript variant 1. mRNA	0.0345389	0.0550423	0.0646607	0.0734314	0.305924	0.0699447	1.83376	0.0149892	0.209839	0	0.007884	0.0873033	0.0194068	0.110568	0.105908	0	0.0536995	0.179669	0.182808	0.0125384
NM_001011517.2	Olfr1193	olfactory receptor 1193 (Olfr1193). mRNA	0	0	0	0	0	0	0	0	0	0	0	0	0	0	0	0	0	0	0	0
NM_001011518.1	Olfr94	olfactory receptor 94 (Olfr94). mRNA	0	0	0	0	0	0	0	0.0180038	0	0	0	0	0	0	0	0	0	0	0	0
NM_001011519.1	Olfr1148	olfactory receptor 1148 (Olfr1148). mRNA	0	0	0	0	0	0	0	0	0	0	0	0	0	0	0	0	0	0	0	0
NM_001011520.2	Olfr310	olfactory receptor 310 (Olfr310). mRNA	0	0	0	0	0	0	0	0	0	0	0	0	0	0	0	0	0	0	0	0
NM_001011523.2	Olfr913	olfactory receptor 913 (Olfr913). mRNA	0	0	0	0	0	0	0	0	0	0	0	0	0	0	0	0	0	0	0	0
NM_001011524.1	Olfr1418	olfactory receptor 1418 (Olfr1418). mRNA	0	0	0	0	0	0	0	0.0218416	0	0	0	0	0	0	0	0	0	0	0	0
NM_001011525.1	Olfr1415	olfactory receptor 1415 (Olfr1415). mRNA	0	0	0	0	0	0	0	0	0	0	0	0	0	0	0	0	0	0	0	0
NM_001011527.1	Olfr503	olfactory receptor 503 (Olfr503). mRNA	0	0	0	0	0	0	0	0	0	0	0	0	0	0	0	0	0	0	0	0
NM_001011528.2	Olfr456	olfactory receptor 456 (Olfr456). mRNA	0.0166486	0	0.0857123	0.0458064	0.102546	0	0	0	0	0	0.0522559	0.0192878	0.01029	0.009771	0.0112311	0	0	0	0	0
NM_001011529.1	Olfr1251	olfactory receptor 1251 (Olfr1251). mRNA	0.0183013	0	0	0	0	0	0.114314	0	0	0	0	0	0	0	0	0	0	0	0	0
NM_001011530.2	Olfr723	olfactory receptor 723 (Olfr723). mRNA	0	0	0	0	0	0	0	0	0	0	0	0	0	0	0	0	0	0	0	0
NM_001011531.3	Olfr329	olfactory receptor 329 (Olfr329). mRNA	0	0	0	0	0	0	0	0	0	0	0	0	0	0	0	0	0	0	0	0
NM_001011532.2	Olfr1037	olfactory receptor 1037 (Olfr1037). mRNA	0	0	0	0	0	0	0	0	0	0	0	0	0	0	0	0	0	0	0	0
NM_001011533.2	Olfr688	olfactory receptor 688 (Olfr688). mRNA	0	0	0	0	0	0	0	0	0	0	0	0	0	0	0	0	0	0	0	0
NM_001011534.1	Olfr988	olfactory receptor 988 (Olfr988). mRNA	0	0	0	0	0	0	0	0	0	0	0	0	0	0	0	0	0	0	0	0
NM_001011535.2	Olfr1182	olfactory receptor 1182 (Olfr1182). mRNA	0	0	0	0	0	0	0	0	0	0	0	0	0	0	0	0	0	0	0	0
NM_001011536.2	Olfr566	olfactory receptor 566 (Olfr566). mRNA	0	0	0	0	0	0	0	0	0	0	0	0	0	0	0	0	0	0	0	0
NM_001011542.2	Olfr1532-ps1	olfactory receptor 1532. pseudogene 1 (Olfr1532-ps1). mRNA	0	0	0	0	0	0	0	0	0	0	0	0	0	0	0	0	0	0	0	0
NM_001011662.2	Olfr180	olfactory receptor 180 (Olfr180). mRNA	0	0	0	0	0	0	0	0	0	0	0	0	0	0	0	0	0	0	0	0
NM_001011684.2	Nms	neuromedin S (Nms). transcript variant 1. mRNA	0	0	0	0	0	0	0	0	0	0	0	0	0	0	0	0	0	0	0	0
NM_001011687.2	Rnase13	ribonuclease. RNase A family. 13 (non-active) (Rnase13). mRNA	0	0	0	0	0	0	0	0	0	0	0	0	0	0	0	0	0	0	0	0
NM_001011695.1	Olfr1000	olfactory receptor 1000 (Olfr1000). mRNA	0	0	0	0	0	0	0	0	0	0	0	0	0	0	0	0	0	0	0	0
NM_001011707.1	Cyp2c66	cytochrome P450. family 2. subfamily c. polypeptide 66 (Cyp2c66). mRNA	0	0	0	0	0	0	0	0	0	0	0	0	0	0	0	0	0	0	0	0
NM_001011721.2	Olfr102	olfactory receptor 102 (Olfr102). mRNA	0	0	0	0	0	0	0	0	0	0	0	0	0	0	0	0	0	0	0	0
NM_001011732.1	Xkr7	X-linked Kx blood group related 7 (Xkr7). mRNA	0	0	0.0165145	0	0.007185	0	0	0	0	0	0	0	0	0	0	0	0	0	0.00812	0
NM_001011733.2	Olfr288	olfactory receptor 288 (Olfr288). mRNA	0	0	0	0	0	0	0	0	0	0	0	0	0	0	0	0	0	0	0	0
NM_001011734.1	Olfr1116	olfactory receptor 1116 (Olfr1116). mRNA	0	0	0	0	0	0	0	0	0	0	0	0	0	0	0	0	0	0	0	0
NM_001011735.2	Olfr1066	olfactory receptor 1066 (Olfr1066). mRNA	0	0	0	0	0	0	0	0	0	0	0	0	0	0	0	0	0	0	0	0
NM_001011736.1	Olfr205	olfactory receptor 205 (Olfr205). mRNA	0	0	0	0	0	0	0	0	0	0	0	0	0	0	0	0	0	0	0	0
NM_001011737.2	Olfr1357	olfactory receptor 1357 (Olfr1357). mRNA	0.0301972	0	0	0	0	0	0	0	0	0	0	0	0	0	0	0	0	0	0	0
NM_001011738.1	Olfr744	olfactory receptor 744 (Olfr744). mRNA	0	0	0	0	0	0	0	0	0	0	0	0	0	0	0	0	0	0	0	0
NM_001011739.1	Olfr885	olfactory receptor 885 (Olfr885). mRNA	0	0	0	0	0	0	0	0	0	0	0	0	0	0	0	0	0	0	0	0
NM_001011740.2	Olfr225	olfactory receptor 225 (Olfr225). mRNA	0	0	0	0	0	0	0.043412	0	0	0	0	0	0	0	0	0	0	0	0	0
NM_001011741.2	Olfr1386	olfactory receptor 1386 (Olfr1386). mRNA	0	0	0	0	0	0	0	0	0	0	0	0	0	0	0	0	0	0	0	0
NM_001011742.1	Olfr479	olfactory receptor 479 (Olfr479). mRNA	0	0	0	0	0	0	0	0	0	0	0	0	0	0	0	0	0	0	0	0
NM_001011743.2	Olfr324	olfactory receptor 324 (Olfr324). mRNA	0	0	0	0	0	0	0	0	0	0	0	0	0	0	0	0	0	0.008757	0	0
NM_001011748.1	Olfr867	olfactory receptor 867 (Olfr867). mRNA	0	0	0	0	0	0	0	0	0	0	0	0	0	0	0	0	0	0	0	0
NM_001011749.1	Olfr704	olfactory receptor 704 (Olfr704). mRNA	0	0	0	0	0	0	0	0	0	0	0	0	0	0	0	0	0	0	0	0
NM_001011750.2	Olfr294	olfactory receptor 294 (Olfr294). mRNA	0	0	0	0	0	0	0	0	0	0	0	0	0	0	0	0	0	0	0	0
NM_001011751.1	Olfr298	olfactory receptor 298 (Olfr298). mRNA	0	0	0	0	0	0	0	0	0	0	0	0	0	0	0	0	0	0	0	0
NM_001011752.1	Olfr293	olfactory receptor 293 (Olfr293). mRNA	0	0	0	0	0	0	0	0	0	0	0	0	0	0	0	0	0	0	0	0
NM_001011753.2	Olfr115	olfactory receptor 115 (Olfr115). mRNA	0	0	0	0	0	0	0	0	0	0	0	0	0	0	0	0	0	0	0	0
NM_001011754.2	Olfr735	olfactory receptor 735 (Olfr735). mRNA	0	0	0	0	0	0	0	0	0	0	0	0	0	0	0	0	0	0	0	0
NM_001011755.1	Olfr671	olfactory receptor 671 (Olfr671). mRNA	0	0	0	0	0	0	0	0	0	0	0	0	0	0	0	0	0	0	0	0
NM_001011756.1	Olfr948	olfactory receptor 948 (Olfr948). mRNA	0	0	0	0	0	0	0	0	0	0	0	0	0	0	0	0	0	0	0	0
NM_001011757.1	Olfr663	olfactory receptor 663 (Olfr663). mRNA	0	0	0	0	0	0	0	0	0	0	0	0	0	0	0	0	0	0	0	0
NM_001011758.2	Olfr1016	olfactory receptor 1016 (Olfr1016). mRNA	0	0	0	0	0	0	0	0	0	0	0	0	0	0	0	0	0	0	0	0
NM_001011759.2	Olfr1031	olfactory receptor 1031 (Olfr1031). mRNA	0	0	0	0	0	0	0	0	0	0	0	0	0	0	0	0	0	0	0	0
NM_001011760.2	Olfr314	olfactory receptor 314 (Olfr314). mRNA	0	0	0	0	0	0	0	0	0	0	0	0	0	0	0	0	0	0	0	0
NM_001011761.1	Olfr1229	olfactory receptor 1229 (Olfr1229). mRNA	0	0	0	0	0	0	0	0	0	0	0	0	0	0	0	0	0	0	0	0
NM_001011767.1	Olfr299	olfactory receptor 299 (Olfr299). mRNA	0	0	0	0	0	0	0	0	0	0	0	0	0	0	0	0	0	0	0	0
NM_001011769.2	Olfr317	olfactory receptor 317 (Olfr317). mRNA	0	0	0	0	0	0	0	0	0.0259415	0	0	0	0	0	0	0	0	0.0348419	0	0
NM_001011770.2	Olfr332	olfactory receptor 332 (Olfr332). mRNA	0	0	0	0	0	0	0	0	0	0	0	0	0	0	0	0	0	0	0	0
NM_001011771.2	Olfr1089	olfactory receptor 1089 (Olfr1089). mRNA	0	0	0	0	0	0	0	0	0	0	0	0	0	0	0	0	0	0	0	0
NM_001011773.1	Olfr1287	olfactory receptor 1287 (Olfr1287). mRNA	0	0	0	0	0	0	0	0	0	0	0	0	0	0	0	0	0	0	0	0
NM_001011774.2	Olfr1028	olfactory receptor 1028 (Olfr1028). mRNA	0	0	0	0	0	0	0	0	0	0	0	0	0	0	0	0	0	0	0	0
NM_001011775.2	Olfr1419	olfactory receptor 1419 (Olfr1419). mRNA	0	0	0	0	0	0	0	0	0	0	0	0	0.009332	0	0	0	0	0	0	0
NM_001011776.1	Olfr527	olfactory receptor 527 (Olfr527). mRNA	0	0	0	0	0	0	0	0	0	0	0	0	0	0	0	0	0	0	0	0
NM_001011777.2	Olfr1042	olfactory receptor 1042 (Olfr1042). mRNA	0	0	0	0	0	0	0	0	0	0	0	0	0	0	0	0	0	0	0	0
NM_001011778.1	Olfr285	olfactory receptor 285 (Olfr285). mRNA	0	0	0	0	0	0	0	0	0	0	0	0	0	0	0	0	0	0	0	0
NM_001011779.1	Olfr286	olfactory receptor 286 (Olfr286). mRNA	0	0	0	0	0	0	0	0	0	0	0	0	0	0	0	0	0	0	0	0
NM_001011780.1	Olfr287	olfactory receptor 287 (Olfr287). mRNA	0	0	0	0	0	0	0.184794	0	0	0	0.0123814	0.005712	0	0	0	0	0	0	0.006241	0
NM_001011782.2	Olfr543	olfactory receptor 543 (Olfr543). mRNA	0	0	0	0	0	0	0.968126	0.0184977	0	0	0	0	0	0	0	0	0	0	0.0392344	0
NM_001011784.2	Olfr1039	olfactory receptor 1039 (Olfr1039). mRNA	0	0	0	0	0	0	0	0	0	0	0	0	0	0	0	0	0	0	0	0
NM_001011785.1	Olfr987	olfactory receptor 987 (Olfr987). mRNA	0	0	0	0	0	0	0	0	0	0	0	0	0	0	0	0	0	0	0	0
NM_001011787.2	Olfr1307	olfactory receptor 1307 (Olfr1307). mRNA	0	0	0	0	0	0	0	0	0	0	0	0	0	0	0	0	0	0	0	0
NM_001011788.1	Olfr1432	olfactory receptor 1432 (Olfr1432). mRNA	0	0	0	0	0	0	0	0	0	0	0	0	0	0	0	0	0	0	0	0
NM_001011789.1	Olfr222	olfactory receptor 222 (Olfr222). mRNA	0	0	0	0	0	0	0.0285784	0	0	0	0	0	0	0	0	0	0	0	0	0
NM_001011790.1	Olfr1382	olfactory receptor 1382 (Olfr1382). mRNA	0	0	0	0	0	0	0	0	0	0	0	0	0	0	0	0	0	0	0	0
NM_001011791.2	Olfr193	olfactory receptor 193 (Olfr193). mRNA	0	0	0	0	0	0	0	0	0	0	0	0	0	0	0	0	0	0	0	0
NM_001011793.1	Olfr598	olfactory receptor 598 (Olfr598). mRNA	0	0	0	0	0	0	0	0	0	0	0	0	0	0	0	0	0	0	0	0
NM_001011794.1	Olfr1322	olfactory receptor 1322 (Olfr1322). mRNA	0	0	0	0	0	0	0	0	0	0	0	0	0	0	0	0	0	0	0	0
NM_001011795.1	Olfr1275	olfactory receptor 1275 (Olfr1275). mRNA	0	0	0	0	0	0	0	0	0	0	0	0	0	0	0	0	0	0	0	0
NM_001011796.2	Olfr1249	olfactory receptor 1249 (Olfr1249). mRNA	0	0	0	0	0	0	0	0	0	0	0	0	0	0	0	0	0	0	0	0
NM_001011797.1	Olfr782	olfactory receptor 782 (Olfr782). mRNA	0	0	0	0	0	0	0	0	0	0	0	0	0	0	0	0	0	0	0	0
NM_001011798.1	Olfr884	olfactory receptor 884 (Olfr884). mRNA	0	0	0	0	0	0	0	0	0	0	0	0	0	0	0	0	0	0	0	0
NM_001011799.1	Olfr453	olfactory receptor 453 (Olfr453). mRNA	0	0	0	0	0	0	0	0	0	0	0	0	0	0	0	0	0	0	0	0
NM_001011800.2	Olfr212	olfactory receptor 212 (Olfr212). mRNA	0	0.009575	0	0.0180345	0.007341	0	0.102356	0.007823	0	0	0	0	0	0	0.008844	0	0	0	0	0
NM_001011801.1	Olfr213	olfactory receptor 213 (Olfr213). mRNA	0	0	0	0	0	0	0	0	0	0	0	0	0	0	0	0	0	0	0	0
NM_001011802.2	Olfr1318	olfactory receptor 1318 (Olfr1318). mRNA	0	0	0	0	0	0	0	0	0	0	0	0	0	0	0	0	0	0	0	0
NM_001011803.2	Olfr1306	olfactory receptor 1306 (Olfr1306). mRNA	0	0	0	0	0	0	0	0	0	0	0	0	0	0	0	0	0	0	0	0
NM_001011804.1	Olfr1211	olfactory receptor 1211 (Olfr1211). mRNA	0	0	0	0	0	0	0	0	0	0	0	0	0	0	0	0	0	0	0	0
NM_001011805.1	Olfr1385	olfactory receptor 1385 (Olfr1385). mRNA	0	0	0	0	0	0	0	0	0	0	0	0	0	0	0	0	0	0	0	0
NM_001011806.1	Olfr901	olfactory receptor 901 (Olfr901). mRNA	0	0	0	0	0	0	0	0	0	0	0	0	0	0	0	0	0	0	0	0
NM_001011807.2	Olfr191	olfactory receptor 191 (Olfr191). mRNA	0	0	0	0	0	0	0	0	0	0	0	0	0	0	0	0	0	0	0	0
NM_001011808.1	Olfr198	olfactory receptor 198 (Olfr198). mRNA	0	0	0	0	0	0	0	0	0	0	0	0	0	0	0	0	0	0	0	0
NM_001011809.2	Olfr728	olfactory receptor 728 (Olfr728). mRNA	0	0	0	0	0	0	0	0	0	0	0	0	0	0	0	0	0	0	0	0
NM_001011810.2	Olfr485	olfactory receptor 485 (Olfr485). mRNA	0	0	0	0	0	0	0	0	0	0	0	0	0	0	0	0	0	0	0	0
NM_001011811.1	Olfr487	olfactory receptor 487 (Olfr487). mRNA	0	0	0	0	0	0	0	0	0	0	0	0	0	0	0	0	0	0	0	0
NM_001011812.1	Olfr951	olfactory receptor 951 (Olfr951). mRNA	0	0	0	0	0	0	0	0	0	0	0	0	0	0	0	0	0	0	0	0
NM_001011813.1	Olfr93	olfactory receptor 93 (Olfr93). mRNA	0	0	0	0.0128297	0	0	0	0	0	0	0	0	0	0	0	0	0	0	0	0
NM_001011814.1	Olfr524	olfactory receptor 524 (Olfr524). mRNA	0	0	0	0	0	0	0	0	0	0	0	0	0	0	0	0	0	0	0	0
NM_001011815.1	Olfr533	olfactory receptor 533 (Olfr533). mRNA	0	0	0	0	0	0	0	0	0	0	0	0	0	0	0	0	0	0.0204058	0	0
NM_001011816.1	Olfr1181	olfactory receptor 1181 (Olfr1181). mRNA	0	0	0	0	0	0	0	0	0	0	0	0	0	0	0	0	0	0	0	0
NM_001011818.2	Olfr316	olfactory receptor 316 (Olfr316). mRNA	0	0	0	0	0	0	0	0	0	0	0	0	0	0	0	0	0	0	0	0
NM_001011819.2	Olfr312	olfactory receptor 312 (Olfr312). mRNA	0	0	0	0	0	0	0	0	0	0	0	0	0	0	0	0	0	0	0	0
NM_001011820.2	Olfr1359	olfactory receptor 1359 (Olfr1359). mRNA	0	0	0	0	0	0	0	0	0	0	0	0	0	0	0	0	0	0	0	0
NM_001011821.1	Olfr804	olfactory receptor 804 (Olfr804). mRNA	0	0	0	0	0	0	0	0	0	0	0	0	0	0	0	0	0	0	0	0
NM_001011822.1	Olfr787	olfactory receptor 787 (Olfr787). mRNA	0	0	0	0	0	0	0	0	0	0	0	0	0	0	0	0	0	0	0	0
NM_001011823.1	Olfr834	olfactory receptor 834 (Olfr834). mRNA	0	0	0	0	0	0	0	0	0	0	0	0	0	0	0	0	0	0	0	0
NM_001011824.1	Olfr832	olfactory receptor 832 (Olfr832). mRNA	0	0	0	0	0	0	0	0	0	0	0	0	0	0	0	0	0	0	0	0
NM_001011825.1	Olfr1105	olfactory receptor 1105 (Olfr1105). mRNA	0	0	0	0	0	0	0	0	0	0	0	0	0	0	0	0	0	0	0	0
NM_001011826.1	Olfr967	olfactory receptor 967 (Olfr967). mRNA	0	0	0	0	0	0	0	0	0	0	0	0	0	0	0	0	0	0	0	0
NM_001011827.1	Olfr963	olfactory receptor 963 (Olfr963). mRNA	0	0	0	0	0	0	0	0	0	0	0	0	0	0	0	0	0	0	0	0
NM_001011828.1	Olfr304	olfactory receptor 304 (Olfr304). mRNA	0	0	0	0	0	0	0	0	0	0	0	0	0	0	0	0	0	0	0	0
NM_001011829.1	Olfr761	olfactory receptor 761 (Olfr761). mRNA	0	0	0	0	0	0	0	0	0	0	0	0	0	0	0	0	0	0	0	0
NM_001011830.3	Olfr119	olfactory receptor 119 (Olfr119). transcript variant 1. mRNA	0	0	0	0	0	0	0	0	0	0	0	0	0	0	0	0	0	0	0	0
NM_001011831.1	Olfr1500	olfactory receptor 1500 (Olfr1500). mRNA	0	0	0	0	0	0	0	0	0	0	0	0	0	0	0	0	0	0	0	0
NM_001011832.1	Olfr1490	olfactory receptor 1490 (Olfr1490). mRNA	0	0	0	0	0	0	0	0	0	0	0	0	0	0	0	0	0	0	0	0
NM_001011833.1	Olfr1137	olfactory receptor 1137 (Olfr1137). mRNA	0	0	0	0	0	0	0	0	0	0	0	0	0	0	0	0	0	0	0	0
NM_001011834.1	Olfr1152	olfactory receptor 1152 (Olfr1152). mRNA	0	0	0	0	0	0	0	0	0	0	0	0	0	0	0	0	0	0	0	0
NM_001011835.1	Olfr1162	olfactory receptor 1162 (Olfr1162). mRNA	0	0	0	0	0	0	0	0	0	0	0	0	0	0	0	0	0	0	0	0
NM_001011836.2	Olfr1129	olfactory receptor 1129 (Olfr1129). mRNA	0	0	0	0	0	0	0	0	0	0	0	0	0	0	0	0	0	0	0	0
NM_001011837.2	Olfr748	olfactory receptor 748 (Olfr748). mRNA	0	0	0	0	0	0	0	0	0	0	0	0	0	0	0	0	0	0	0	0
NM_001011839.2	Olfr1437	olfactory receptor 1437 (Olfr1437). mRNA	0	0	0	0	0	0	0	0	0	0	0	0	0	0	0	0	0	0	0	0
NM_001011840.1	Olfr1463	olfactory receptor 1463 (Olfr1463). mRNA	0	0	0	0	0	0	0	0	0	0	0	0	0	0	0	0	0	0	0	0
NM_001011841.1	Olfr1465	olfactory receptor 1465 (Olfr1465). mRNA	0	0	0	0	0	0	0	0	0	0	0	0	0	0	0	0	0	0	0	0
NM_001011842.1	Olfr1474	olfactory receptor 1474 (Olfr1474). mRNA	0	0	0	0	0	0	0	0	0	0	0	0	0	0	0	0	0	0	0	0
NM_001011845.2	Olfr597	olfactory receptor 597 (Olfr597). mRNA	0	0	0	0	0	0	0	0	0	0	0	0	0	0	0	0	0	0	0	0
NM_001011846.1	Olfr517	olfactory receptor 517 (Olfr517). mRNA	0	0	0	0	0	0	0	0	0	0	0	0	0	0	0	0	0	0	0	0
NM_001011847.1	Olfr591	olfactory receptor 591 (Olfr591). mRNA	0	0	0	0	0	0	0	0	0	0	0	0	0	0	0	0	0	0	0	0
NM_001011848.1	Olfr675	olfactory receptor 675 (Olfr675). mRNA	0	0	0	0	0	0	0	0	0	0	0	0	0	0	0	0	0	0	0	0
NM_001011849.1	Olfr792	olfactory receptor 792 (Olfr792). mRNA	0	0	0	0	0	0	0	0	0	0	0	0	0	0	0	0	0	0	0	0
NM_001011850.1	Olfr1505	olfactory receptor 1505 (Olfr1505). mRNA	0	0	0	0	0	0	0	0	0	0	0	0	0	0	0	0	0	0	0	0
NM_001011851.1	Olfr412	olfactory receptor 412 (Olfr412). mRNA	0	0	0	0	0	0	0	0	0	0	0	0	0	0	0	0	0	0	0	0
NM_001011852.2	Olfr1029	olfactory receptor 1029 (Olfr1029). mRNA	0	0	0	0	0	0	0	0	0	0	0	0	0	0	0	0	0	0	0	0
NM_001011853.1	Olfr1425	olfactory receptor 1425 (Olfr1425). mRNA	0	0	0	0	0	0	0	0	0	0	0	0	0	0	0	0	0	0	0	0
NM_001011854.2	Olfr605	olfactory receptor 605 (Olfr605). mRNA	0	0	0	0	0	0	0	0	0	0	0	0	0	0	0	0	0	0	0	0
NM_001011855.1	Olfr169	olfactory receptor 169 (Olfr169). mRNA	0	0	0	0	0	0	0	0	0	0	0	0	0	0	0	0	0	0	0	0
NM_001011856.2	Olfr1331	olfactory receptor 1331 (Olfr1331). mRNA	0	0	0	0	0	0	0	0	0	0	0	0	0	0	0	0	0	0	0	0
NM_001011857.1	Olfr685	olfactory receptor 685 (Olfr685). mRNA	0	0	0	0	0	0	0	0	0	0	0	0	0	0	0	0	0	0	0	0
NM_001011858.1	Olfr504	olfactory receptor 504 (Olfr504). mRNA	0	0	0	0	0	0	0	0	0	0	0	0	0	0	0	0	0	0	0	0
NM_001011859.1	Olfr965	olfactory receptor 965 (Olfr965). mRNA	0	0	0	0	0	0	0	0	0	0	0	0	0	0	0	0	0	0	0	0
NM_001011860.1	Olfr1222	olfactory receptor 1222 (Olfr1222). mRNA	0	0	0	0	0	0	0	0	0	0	0	0	0	0	0	0	0	0	0	0
NM_001011861.3	Olfr331	olfactory receptor 331 (Olfr331). mRNA	0	0	0	0	0	0	0	0	0	0	0	0	0	0	0	0	0	0	0	0
NM_001011862.1	Olfr699	olfactory receptor 699 (Olfr699). mRNA	0	0	0	0	0	0	0	0	0	0	0	0	0	0	0	0	0	0	0	0
NM_001011863.1	Olfr406	olfactory receptor 406 (Olfr406). mRNA	0	0	0	0	0	0	0	0	0	0	0	0	0	0	0	0	0	0	0	0
NM_001011864.1	Olfr917	olfactory receptor 917 (Olfr917). mRNA	0	0	0	0	0	0	0	0	0	0	0	0	0	0	0	0	0	0	0	0
NM_001011865.2	Olfr624	olfactory receptor 624 (Olfr624). mRNA	0	0	0	0	0	0	0	0	0	0	0	0	0	0	0	0	0	0	0	0
NM_001011866.1	Olfr309	olfactory receptor 309 (Olfr309). mRNA	0	0	0	0	0	0	0	0	0	0	0	0	0	0	0	0	0	0	0	0
NM_001011867.1	Olfr538	olfactory receptor 538 (Olfr538). mRNA	0	0	0	0	0	0	0	0	0	0	0	0	0	0	0	0	0	0	0	0
NM_001011868.1	Olfr1178	olfactory receptor 1178 (Olfr1178). mRNA	0	0	0	0	0	0	0	0	0	0	0	0	0	0	0	0	0	0	0	0
NM_001011869.1	Olfr452	olfactory receptor 452 (Olfr452). mRNA	0	0	0	0	0	0	0	0	0	0	0	0	0	0	0	0	0	0	0	0
NM_001011870.2	Olfr1329	olfactory receptor 1329 (Olfr1329). mRNA	0	0	0	0	0	0	0	0	0	0	0	0	0	0	0	0	0	0	0	0
NM_001011871.1	Olfr506	olfactory receptor 506 (Olfr506). mRNA	0	0	0	0	0	0	0	0	0	0	0	0	0	0	0	0	0	0	0	0
NM_001011872.2	Olfr1034	olfactory receptor 1034 (Olfr1034). mRNA	0	0	0	0	0	0	0	0	0	0	0	0	0	0	0	0	0	0	0	0
NM_001011873.2	Xkr9	X-linked Kx blood group related 9 (Xkr9). mRNA	0	0	0	0	0	0	0	0	0	0	0	0	0	0	0	0	0	0	0	0
NM_001011874.1	Xkr4	X-linked Kx blood group related 4 (Xkr4). mRNA	0	0	0	0.013195	0	0	0.112334	0	0	0	0	0	0	0	0	0	0	0	0	0
NM_001011875.2	Rnase12	ribonuclease. RNase A family. 12 (non-active) (Rnase12). mRNA	0	0	0	0.0442094	0	0	0	0.0767061	0	0	0	0	0	0	0	0	0	0	0	0
NM_001011876.2	Ang6	angiogenin. ribonuclease A family. member 6 (Ang6). mRNA	0	0	0	0	0	0	0	0	0	0	0	0	0	0	0	0	0	0	0	0
NM_001011877.2	Rnase11	ribonuclease. RNase A family. 11 (non-active) (Rnase11). mRNA	0	0	0	0	0	0	0	0	0	0	0	0	0	0	0	0	0	0	0	0
NM_001012236.1	Trex1	three prime repair exonuclease 1 (Trex1). transcript variant 2. mRNA	1.77622	4.68263	2.32867	3.25044	1.47107	2.42311	13.2361	1.72543	9.15589	2.97703	2.42712	3.0819	1.78716	3.18072	1.67194	1.38261	4.94517	5.79328	3.55516	3.45298
NM_001012265.1	Olfr857	olfactory receptor 857 (Olfr857). mRNA	0	0	0	0	0	0	0	0	0	0	0	0	0	0	0	0	0	0	0	0
NM_001012266.1	Olfr835	olfactory receptor 835 (Olfr835). mRNA	0	0	0	0	0	0	0	0	0	0	0	0	0	0	0	0	0	0	0	0
NM_001012269.2	Olfr1513	olfactory receptor 1513 (Olfr1513). mRNA	0	0	0	0	0	0	0	0	0	0	0	0	0	0	0	0	0	0	0	0
NM_001012273.1	Birc5	baculoviral IAP repeat-containing 5 (Birc5). transcript variant 3. mRNA	0.0692166	0.194737	0.0626909	0.172806	0.0545479	0.0539339	9.19124	0.11626	0.051397	0.0698395	0.0965571	0.0564292	0.0633788	0.0752279	0.0587987	0.0407109	0.0219215	0.0143814	0.0162232	0.0204741
NM_001012305.2	Slc39a12	solute carrier family 39 (zinc transporter). member 12 (Slc39a12). mRNA	0	0	0.0292107	0	0	0	0	0	0	0	0	0	0	0	0	0	0	0	0	0
NM_001012306.2	Hsd3b3	hydroxy-delta-5-steroid dehydrogenase. 3 beta- and steroid delta-isomerase 3 (Hsd3b3). transcript variant 5. mRNA	0	0	0	0	0	0	0	0	0	0	0	0	0	0	0	0	0	0	0	0
NM_001012307.2	Defa23	defensin. alpha. 23 (Defa23). mRNA	0	0	0	0	0	0	0	0	0	0	0	0	0	0	0	0	0	0	0	0
NM_001012309.2	Nsrp1	nuclear speckle regulatory protein 1 (Nsrp1). mRNA	0.534043	0.718877	0.593787	0.746211	0.757768	0.13149	8.32188	0.553927	0.460918	0.0553981	0.775803	0.741791	0.597938	0.626857	0.531905	0.194687	0.302851	0.175678	0.265415	0.122818
NM_001012310.2	Slc25a47	solute carrier family 25. member 47 (Slc25a47). mRNA	0.0272131	0.0159015	0	0	0.0487614	0.0269423	0.883888	0.0129909	0.036373	0	0.0409993	0.0126108	0	0	0.0440587	0.0132972	0	0	0.0275543	0
NM_001012311.2	Pgbd1	piggyBac transposable element derived 1 (Pgbd1). transcript variant 3. mRNA	0	0.0163381	0.0215923	0	0	0	0	0	0	0	0	0	0	0	0.007545	0	0	0	0	0
NM_001012322.2	Sctr	secretin receptor (Sctr). transcript variant 1. mRNA	0	0	0	0	0	0	0	0	0	0	0	0	0	0	0	0	0	0	0	0
NM_001012323.1	Mup20	major urinary protein 20 (Mup20). mRNA	0	0.170192	0	0.0267119	0	0	0	0	0.0432551	0	0	0	0	0	0	0	0	0	0	0
NM_001012324.3	Ecm2	extracellular matrix protein 2. female organ and adipocyte specific (Ecm2). mRNA	0.0267878	0.0675923	0.0282093	0.0837533	0.0736354	0.0180827	1.00393	0.0435951	0	0.006031	0.085609	0.0282129	0.0812785	0.0343019	0.0262849	0.0208239	0	0	0.0154112	0.0324154
NM_001012325.2	Zfp708	zinc finger protein 708 (Zfp708). transcript variant 1. mRNA	0	0	0	0.0375444	0	0	0.0852343	0	0	0	0	0	0	0	0	0	0	0	0	0
NM_001012330.1	Zbtb18	zinc finger and BTB domain containing 18 (Zbtb18). transcript variant 1. mRNA	0	0	0	0	0	0.0337969	0	0	0	0	0	0	0	0	0	0	0	0	0	0
NM_001012335.2	Mdk	midkine (Mdk). transcript variant 2. mRNA	0	0	0	0	0	0	0.155749	0.119034	0	0	0	0.231102	0	0	0	0.036552	0	0	0	0
NM_001012336.2	Mdk	midkine (Mdk). transcript variant 3. mRNA	0	0	0	0.110145	0	0	0	0	0	0	0	0.0695683	0	0	0	0	0	0	0	0
NM_001012363.2	Slc2a9	solute carrier family 2 (facilitated glucose transporter). member 9 (Slc2a9). transcript variant 2. mRNA	0	0	0	0	0	0	0	0	0	0	0	0	0	0	0	0	0	0	0	0
NM_001012392.1	Bpifb1	BPI fold containing family B. member 1 (Bpifb1). transcript variant 1. mRNA	0	0	0	0	0	0	0	0	0	0	0	0	0	0	0	0	0	0	0	0
NM_001012396.2	Hacd1	3-hydroxyacyl-CoA dehydratase 1 (Hacd1). transcript variant 2. mRNA	0.490324	0.300837	0.605841	1.24113	0.329467	0.145633	0.122506	0.187256	0.589828	0.534315	0.91109	1.35196	0.363665	0.414389	0.238154	0.0958348	0.307474	0.143035	0.248236	0.63961
NM_001012400.2	AU022252	expressed sequence AU022252 (AU022252). mRNA	0.178239	0.205561	0.108667	0.0774316	0.0315173	0.116096	0.351574	0.128751	0.203753	0.0232334	0.117779	0.0869448	0.121761	0.187194	0.0759405	0.091677	0.0401092	0.105253	0.0712398	0
NM_001012401.3	Hspb6	heat shock protein. alpha-crystallin-related. B6 (Hspb6). transcript variant 1. mRNA	0.195182	0.13306	0.100486	0.214807	0	0.0805167	0.568936	0	0	0	0	0.143211	0.249315	0	0	0	0	0.124095	0.131753	0
NM_001012402.2	Hs3st6	heparan sulfate (glucosamine) 3-O-sulfotransferase 6 (Hs3st6). transcript variant 1. mRNA	0.0140227	0	0	0.0385815	0	0	0	0	0	0	0	0	0	0	0.0189193	0	0	0	0	0
NM_001012434.3	Kctd14	potassium channel tetramerisation domain containing 14 (Kctd14). transcript variant 2. mRNA	0.059598	0	0	0	0	0	0.84922	0	0	0	0	0	0.105903	0.231729	0.0502555	0	0	0	0	0
NM_001012448.2	Zfp708	zinc finger protein 708 (Zfp708). transcript variant 2. mRNA	0.0141302	0.0516044	0	0.0485965	0	0	0.231682	0.0168636	0	0	0	0	0	0	0	0	0	0	0.008942	0
NM_001012449.2	Zfp708	zinc finger protein 708 (Zfp708). transcript variant 3. mRNA	0	0	0	0	0	0	0	0	0	0	0	0	0	0	0	0	0	0	0	0
NM_001012450.1	Ankrd6	ankyrin repeat domain 6 (Ankrd6). transcript variant 1. mRNA	0	0	0	0	0	0	0	0	0	0	0	0	0	0	0	0	0	0	0	0
NM_001012451.1	Ankrd6	ankyrin repeat domain 6 (Ankrd6). transcript variant 3. mRNA	0	0	0	0	0	0	0	0	0	0	0.0445327	0	0	0	0	0	0	0	0	0
NM_001012477.2	Cxcl12	chemokine (C-X-C motif) ligand 12 (Cxcl12). transcript variant 3. mRNA	0	0	0	0.008499	0.006919	0	0.0385884	0.0110595	0	0	0.0155127	0	0.007637	0.0108774	0	0	0	0	0	0
NM_001012517.5	Fut10	fucosyltransferase 10 (Fut10). transcript variant 2. mRNA	0.0869919	0	0	0.013297	0.0432986	0	0	0.0288389	0	0	0.0424738	0.011198	0.0597411	0.0340369	0.0195614	0	0	0	0.0397595	0
NM_001012518.3	Ehmt1	euchromatic histone methyltransferase 1 (Ehmt1). transcript variant 1. mRNA	0	0	0	0	0	0	0	0	0	0	0	0	0	0	0	0	0	0	0	0
NM_001012520.2	Klri1	killer cell lectin-like receptor family I member 1 (Klri1). mRNA	0.125401	0	0	0.14376	0	0.0258653	0.48955	0.062358	0	0.0776432	0.0524804	0	0.0258356	0	0	0	0.0893603	0	0.0529056	0
NM_001012623.4	Rims1	regulating synaptic membrane exocytosis 1 (Rims1). transcript variant 3. mRNA	0	0	0	0	0	0	0	0	0	0	0	0	0	0	0	0	0	0	0	0
NM_001012624.4	Rims1	regulating synaptic membrane exocytosis 1 (Rims1). transcript variant 4. mRNA	0	0	0	0	0	0	0	0	0	0	0	0	0	0	0	0	0	0	0	0
NM_001012625.4	Rims1	regulating synaptic membrane exocytosis 1 (Rims1). transcript variant 5. mRNA	0	0	0	0	0	0	0	0	0	0	0	0	0	0	0	0	0	0	0	0
NM_001012638.2	Acd	adrenocortical dysplasia (Acd). transcript variant 1. mRNA	0.74565	1.53153	0.613348	0.709559	0.879001	0	0.805428	0.354618	0.318473	0	0.464562	1.3315	0.796982	0.881822	0.559741	0.0958808	0.263676	0.245321	0.219971	0
NM_001012640.2	AY761185	cDNA sequence AY761185 (AY761185). mRNA	0	0	0	0	0	0	0	0	0	0	0	0	0	0	0	0	0	0.0808675	0	0
NM_001012667.2	Smim19	small integral membrane protein 19 (Smim19). transcript variant 1. mRNA	0	0	0.0916355	0	0	0	3.29825	0	0	0	0	0	0	0.466601	0	0.0507337	0	0	0	0
NM_001012704.1	Wfdc13	WAP four-disulfide core domain 13 (Wfdc13). mRNA	0.008154	0	0	0	0	0	0.0254651	0	0	0	0	0	0	0	0	0	0	0	0	0
NM_001012723.2	Wfdc16	WAP four-disulfide core domain 16 (Wfdc16). mRNA	0	0	0	0	0	0	0	0	0	0	0	0	0	0	0	0	0	0	0	0
NM_001012725.2	Wfdc6b	WAP four-disulfide core domain 6B (Wfdc6b). mRNA	0	0	0	0	0	0	0	0	0	0	0	0	0	0	0	0	0	0	0	0
NM_001012726.2	Aym1	activator of yeast meiotic promoters 1 (Aym1). mRNA	0	0	0	0	0	0	0	0	0	0	0	0	0	0	0	0	0	0	0	0
NM_001012765.5	Adcy5	adenylate cyclase 5 (Adcy5). mRNA	0.009951	0.0145372	0.0336214	0.106096	0.0501501	0.0461827	0.128201	0.0311755	0.0471075	0.0708568	0.0281113	0.0720552	0.0276778	0.055484	0.0436352	0.0273517	0.0443205	0	0.0377854	0.0496729
NM_001013012.2	Zfp787	zinc finger protein 787 (Zfp787). transcript variant 2. mRNA	0.0786435	0.817708	0.190532	0.28638	0.222772	0	0.375641	0	0	0.0859284	0.325251	0.192939	0.194429	0.488707	0.280865	0	0	0.0778558	0.0819715	0.0615772
NM_001013013.2	Dhrs7c	dehydrogenase/reductase (SDR family) member 7C (Dhrs7c). mRNA	0	0	0	0	0	0	0	0	0	0	0	0	0	0	0	0	0	0	0.0196346	0
NM_001013019.3	Lrrn4cl	LRRN4 C-terminal like (Lrrn4cl). transcript variant 1. mRNA	0	0	0	0	0	0	2.62976	0	0	0	0	0	0.108251	0	0	0	0	0	0	0
NM_001013022.1	Odf3b	outer dense fiber of sperm tails 3B (Odf3b). mRNA	0	0	0	0	0	0	0.305297	0	0	0	0	0	0.0100699	0	0	0	0	0	0	0
NM_001013023.2	Mterf1a	mitochondrial transcription termination factor 1a (Mterf1a). transcript variant 1. mRNA; nuclear gene for mitochondrial product	0	0.0743764	0	0	0	0	0.993806	0	0	0	0.103874	0.162208	0.0944049	0	0.154558	0	0.0453512	0	0	0
NM_001013024.2	Usp13	ubiquitin specific peptidase 13 (isopeptidase T-3) (Usp13). mRNA	0	0	0.009621	0	0	0	0.0116729	0	0	0	0.004693	0	0.00462	0	0	0.0273945	0	0	0.009461	0
NM_001013025.3	Tgfbrap1	transforming growth factor. beta receptor associated protein 1 (Tgfbrap1). transcript variant 1. mRNA	0.0373242	0.0272621	0.106086	0.121947	0.116689	0.0885326	2.01564	0	0	0	0.0702907	0.0306289	0	0	0.0251786	0.0151981	0	0	0	0
NM_001013026.2	Ttf2	transcription termination factor. RNA polymerase II (Ttf2). mRNA	0.169184	0.235914	0.136095	0.26977	0.232529	0.0713779	3.87277	0.112428	0.0642416	0	0.137584	0	0.242406	0.248234	0.150444	0.0422736	0.0438399	0.0301988	0	0.0486224
NM_001013028.2	Tmem263	transmembrane protein 263 (Tmem263). mRNA	0.127487	0.474056	0.378888	0.357139	0.160943	0.0803206	3.53271	0.0857563	0.162653	0.0459255	0.474358	0.255111	0.171918	0.323774	0.0906927	0.0792831	0.0561597	0.0520138	0.143754	0.0493661
NM_001013256.2	Ctc1	CTS telomere maintenance complex component 1 (Ctc1). transcript variant 1. mRNA	0.19051	0.409808	0	0.0230401	0.363401	0.036272	6.21135	0	0.200537	0	0	0.121269	0	0.552906	0	0	0	0	0.103339	0
NM_001013360.2	Npcd	neuronal pentraxin chromo domain (Npcd). transcript variant 1. mRNA	0.0114224	0.0111241	0.0612563	0.0130946	0	0	0.630229	0.049984	0	0.004715	0	0	0	0	0	0.004651	0	0	0	0
NM_001013362.2	Npcd	neuronal pentraxin chromo domain (Npcd). transcript variant 2. mRNA	0	0	0	0	0	0.004432	0	0	0.003989	0	0	0	0	0	0	0	0	0	0.002266	0
NM_001013365.2	Osm	oncostatin M (Osm). mRNA	0.179093	0.268332	0.27779	0.252692	1.31139	1.05704	19.8489	1.9346	2.03059	0.47198	0.397813	0.335164	0.289502	0.431217	0.718693	0.583401	0.863895	0.932563	0.976437	0.323963
NM_001013366.1	Wdr91	WD repeat domain 91 (Wdr91). mRNA	0.71416	1.30756	0.980457	1.18331	0.472762	0.212116	24.683	0.446989	0.494948	0.259411	0.924522	1.03329	0.945577	1.21085	0.531014	0.221008	0.21261	0.149571	0.329418	0.156322
NM_001013367.3	Prkaa1	protein kinase. AMP-activated. alpha 1 catalytic subunit (Prkaa1). transcript variant 1. mRNA	0.600116	0.637576	0.677965	1.04296	0.766874	0.118736	9.37111	0.336773	0.437935	0.170059	1.25653	0.673452	0.641832	0.653626	0.416256	0.147077	0.209128	0.0970931	0.197626	0
NM_001013368.5	E2f8	E2F transcription factor 8 (E2f8). transcript variant 2. mRNA	0.0709084	0	0.0912645	0.0422704	0.055587	0	1.71996	0	0.0631839	0.111222	0	0.0520276	0	0.0638112	0	0	0	0	0.0418818	0
NM_001013369.2	Pfdn4	prefoldin 4 (Pfdn4). transcript variant 2. mRNA	0.0427701	0	0.110097	0	0	0	1.87005	0	0	0	0	0	0	0	0	0	0	0	0	0
NM_001013370.2	Sesn1	sestrin 1 (Sesn1). transcript variant 2. mRNA	2.27647	4.0063	2.49416	4.16482	1.69335	0.373422	127.041	1.60449	1.36676	0.543869	4.42395	3.52292	3.14972	3.78975	1.55152	0.614332	0.430038	0.315978	0.87838	0.392718
NM_001013371.2	Dtx3l	deltex 3-like. E3 ubiquitin ligase (Dtx3l). mRNA	0.831603	1.39014	1.18999	1.63232	1.56733	2.11898	35.9646	0.786715	5.11328	2.70215	1.27751	1.52935	0.892167	1.07732	0.862015	1.29254	1.62844	1.93625	3.03353	1.42642
NM_001013372.2	Nrp	neural regeneration protein (Nrp). mRNA	0.104787	0.0874717	0.0867013	0.0617798	0.0167643	0.0185257	3.24922	0.0357306	0.0666941	0	0	0.0867126	0.0462611	0.0175712	0.0403934	0.0182864	0.19201	0.0167956	0.132626	0.0597773
NM_001013373.2	Tmprss13	transmembrane protease. serine 13 (Tmprss13). mRNA	0	0	0	0.01485	0.006044	0.00668	0.56469	0	0.006012	0	0	0.009379	0.003336	0	0	0	0	0.006056	0	0
NM_001013374.2	Lman2l	lectin. mannose-binding 2-like (Lman2l). transcript variant 2. mRNA	0.221748	0.894943	0.430529	0.460167	0.159945	0.0372105	3.0284	0.130079	0.154892	0.0698123	0.651185	0.374464	0.260174	0.4544	0.258613	0.059686	0.0374955	0.0801213	0.0142709	0.115065
NM_001013375.1	Utp18	UTP18 small subunit processome component (Utp18). mRNA	0.546277	0.974265	0.51762	0.705397	0.319023	0.402312	8.36291	0.219983	0.600994	0.365207	0.538582	0.671699	0.613132	0.621548	0.33008	0.110537	0.563612	0.270734	0.386	0.347957
NM_001013376.2	Rpp38	ribonuclease P/MRP 38 subunit (Rpp38). mRNA	0.204647	0.411062	0.230472	0.304989	0.171888	0.084421	0.479349	0.0407058	0.0569855	0.168945	0.278345	0.207452	0.295134	0.0800712	0.241593	0.0208326	0.0972203	0.0669696	0.107923	0.0908009
NM_001013377.3	Arhgef39	Rho guanine nucleotide exchange factor (GEF) 39 (Arhgef39). mRNA	0.046391	0.0521302	0.0459298	0.157093	0.0639422	0.0353302	2.61905	0.0979534	0.0715453	0.0176759	0.0672044	0.0826844	0.044112	0.0502648	0.0192585	0	0.0152575	0	0.0361327	0.0190001
NM_001013378.2	Uspl1	ubiquitin specific peptidase like 1 (Uspl1). transcript variant 4. mRNA	0.0481752	0.0390976	0.1309	0.007364	0.005995	0.0331221	1.42097	0	0	0	0.0940862	0	0.006617	0.0502648	0	0	0.0877308	0	0	0
NM_001013379.2	Zfp930	zinc finger protein 930 (Zfp930). mRNA	0.233837	0.333055	0.338586	0.438295	0.117843	0	0.657265	0.0209303	0.136739	0.0868692	0.374317	0.237041	0.115622	0.247029	0.157745	0.0642711	0.124973	0.0327951	0.0480936	0.0233443
NM_001013380.2	Dync1li2	dynein. cytoplasmic 1 light intermediate chain 2 (Dync1li2). mRNA	0.488081	1.11768	0.928956	1.3377	0.527606	0.167915	11.8768	0.305867	0.495362	0.18902	1.23503	0.737925	0.771058	0.778623	0.503418	0.290057	0.193374	0.198749	0.35777	0.233282
NM_001013381.2	Rsad1	radical S-adenosyl methionine domain containing 1 (Rsad1). mRNA; nuclear gene for mitochondrial product	0	0	0	0	0	0.0468145	0	0	0	0	0	0	0	0	0	0	0	0	0	0
NM_001013382.3	Lrrc52	leucine rich repeat containing 52 (Lrrc52). mRNA	0	0.0225026	0	0	0	0	0	0.0183838	0	0	0	0	0	0	0	0	0	0	0	0
NM_001013384.2	Podnl1	podocan-like 1 (Podnl1). mRNA	0.0294713	1.00251	0.222172	0.0984616	0	0	2.19585	0.0401969	0	0	0.111004	0.170715	0.0156131	0	0.0340819	0	0.0420022	0	0	0
NM_001013385.2	Grm4	glutamate receptor. metabotropic 4 (Grm4). transcript variant 2. mRNA	0	0	0	0	0.006071	0	0	0	0	0	0	0	0.006701	0	0	0	0	0	0	0
NM_001013386.3	Rasl10b	RAS-like. family 10. member B (Rasl10b). transcript variant 1. mRNA	0	0	0	0	0	0	0	0	0	0	0	0	0	0	0	0	0	0	0	0
NM_001013387.2	Zfp182	zinc finger protein 182 (Zfp182). transcript variant 1. mRNA	0	0	0	0	0	0	1.62619	0	0.009886	0	0	0	0.0548569	0	0	0.0144562	0	0	0	0
NM_001013389.2	Mrs2	MRS2 magnesium transporter (Mrs2). mRNA; nuclear gene for mitochondrial product	0.113467	0.183515	0.125177	0.183967	0.0862266	0.0200602	3.73351	0.125743	0.0406229	0.0501813	0.198422	0.253517	0.0450837	0.166483	0.0218696	0	0.0115508	0.0545603	0.112837	0
NM_001013390.3	Scn4b	sodium channel. type IV. beta (Scn4b). mRNA	0.0330391	0.0160881	0.0944973	0.00505	0.0267225	0.0159008	0.229298	0.0219057	0.032711	0	0.009218	0.008506	0.004538	0.012927	0.009906	0.0134532	0.0104638	0	0.016262	0
NM_001013391.2	Cpsf6	cleavage and polyadenylation specific factor 6 (Cpsf6). transcript variant 2. mRNA	0.274751	0.806644	0.3243	0.414844	0.198124	0.096201	4.16061	0.12956	0.211979	0	0.403844	0.627293	0.468856	0.528588	0.291127	0.0933212	0.0267415	0.139847	0.195076	0.169479
NM_001013393.1	Gm11487	predicted gene 11487 (Gm11487). mRNA	0	0	0	0	0	0	0	0	0	0	0	0	0	0	0	0	0	0	0	0
NM_001013405.2	Tcaim	T cell activation inhibitor. mitochondrial (Tcaim). mRNA; nuclear gene for mitochondrial product	0.0458942	0.18437	0.214126	0.28411	0	0	0.322497	0	0	0	0	0.106339	0.0354572	0	0	0.0280316	0	0	0.007261	0
NM_001013411.2	Nkain2	Na+/K+ transporting ATPase interacting 2 (Nkain2). transcript variant 1. mRNA	0	0	0.0211005	0.022553	0	0	0	0	0	0	0	0	0	0	0	0	0	0	0	0
NM_001013412.2	Ccl26	chemokine (C-C motif) ligand 26 (Ccl26). mRNA	0	0	0	0	0	0	0	0	0	0	0	0	0	0	0	0	0	0	0	0
NM_001013414.3	Neurl4	neuralized E3 ubiquitin protein ligase 4 (Neurl4). transcript variant 1. mRNA	0	0	0	0	0	0	0	0	0.0185191	0	0	0	0	0	0	0	0	0	0	0.0309839
NM_001013441.2	Ric8b	RIC8 guanine nucleotide exchange factor B (Ric8b). transcript variant 1. mRNA	0.0447069	0.138455	0.078256	0.110704	0.0420563	0.0553275	0.6311	0.0384157	0.0378449	0.0730769	0.145937	0.0890854	0.0862117	0.031486	0	0.0131071	0.0407781	0.0140449	0.0271604	0.0166624
NM_001013575.5	Olfr112	olfactory receptor 112 (Olfr112). mRNA	0	0	0	0	0	0	0	0	0	0	0	0	0	0	0	0	0	0	0	0
NM_001013577.1	Inip	INTS3 and NABP interacting protein (Inip). mRNA	0.22294	0.575892	0.4829	0.400198	0.5511	0.111034	2.28408	0.0746283	0	0	0.430091	0.340174	0.292389	0.660597	0.377818	0.0398543	0.166615	0	0.251199	0.0542839
NM_001013580.4	Pard3	par-3 family cell polarity regulator (Pard3). transcript variant 2. mRNA	0	0	0.005379	0	0	0	0	0	0.009309	0	0	0	0.0154976	0	0	0	0	0	0	0
NM_001013581.3	Pard3	par-3 family cell polarity regulator (Pard3). transcript variant 1. mRNA	0.0109328	0.0239564	0.0175892	0.00376	0.0122436	0.01353	0.128041	0.0163096	0.009133	0.006769	0.0171577	0	0.0202717	0	0.0110628	0	0.007791	0	0.0172967	0
NM_001013607.1	Vmo1	vitelline membrane outer layer 1 homolog (chicken) (Vmo1). mRNA	0	0	0	0	0	0	0	0	0	0	0	0	0	0	0	0	0	0	0	0
NM_001013608.3	Ercc6l2	excision repair cross-complementing rodent repair deficiency. complementation group 6 like 2 (Ercc6l2). transcript variant 1. mRNA	0.198463	0.400906	0.233486	0.369006	0.0989743	0.0767532	1.76745	0	0.0431746	0.0691201	0.30173	0.273034	0.201246	0.289374	0.13179	0	0.061873	0.055668	0.10597	0.0206384
NM_001013609.2	Tex24	testis expressed gene 24 (Tex24). mRNA	0	0	0	0	0	0	0	0	0	0	0	0	0	0	0	0	0	0.011121	0	0
NM_001013616.2	Trim6	tripartite motif-containing 6 (Trim6). mRNA	0	0	0	0	0	0	0	0	0	0	0	0	0	0	0	0	0	0	0	0
NM_001013741.1	Ddn	dendrin (Ddn). mRNA	0	0	0.0904104	0.006442	0	0.005795	0.226694	0	0	0	0.005879	0	0	0	0.006318	0.0171619	0	0	0	0
NM_001013745.2	Zfp57	zinc finger protein 57 (Zfp57). transcript variant 1. mRNA	0	0	0	0	0	0	0	0	0	0	0	0	0	0	0	0	0	0	0	0
NM_001013749.2	Tmem151b	transmembrane protein 151B (Tmem151b). mRNA	0.001804	0.121258	0.0301927	0.136532	0.0262709	0.100492	0.388856	0.0559924	0.146722	0.172059	0.131401	0.119161	0.0847628	0.307125	0.136337	0.0573123	0.0771522	0.0951564	0.0593811	0.0864695
NM_001013750.1	Gm597	predicted gene 597 (Gm597). mRNA	0	0	0	0	0	0	0	0	0	0	0	0	0	0	0	0	0	0	0	0
NM_001013751.2	Syna	syncytin a (Syna). mRNA	0	0	0	0	0.006722	0	0.0374908	0	0	0	0	0	0.00742	0	0	0	0	0	0	0
NM_001013753.2	Pcdh17	protocadherin 17 (Pcdh17). mRNA	0.0009209	0.002691	0.0248916	0.003801	0.002063	0.004559	0	0	0.0123092	0	0	0	0.007969	0	0	0.00225	0	0.001033	0.002331	0.002452
NM_001013754.2	Gm9949	predicted gene 9949 (Gm9949). mRNA	0.248683	0.181641	0.0914496	0.158836	0	0.219829	0	0.572378	0.0989251	0.17597	0.044603	0.267525	0.109788	0.166802	0.203708	0.260387	0.202526	0.478316	0.337233	0.378307
NM_001013755.3	5730409E04Rik	RIKEN cDNA 5730409E04Rik gene (5730409E04Rik). transcript variant 2. mRNA	0	0.0673302	0.0276836	0.126811	0.006882	0	0.75811	0.007334	0.003422	0.00761	0.0347199	0.0889945	0.0759656	0	0.0165826	0.003754	0.0131375	0	0.0116671	0
NM_001013756.2	Grhl3	grainyhead like transcription factor 3 (Grhl3). mRNA	0.003116	0.009105	0	0	0	0.007714	0.0486647	0	0	0	0	0	0	0	0	0	0	0.006993	0.007889	0
NM_001013757.2	Vwde	von Willebrand factor D and EGF domains (Vwde). transcript variant 2. mRNA	0	0	0	0	0	0	0	0	0	0	0	0	0	0	0	0	0	0	0	0
NM_001013758.2	Lingo3	leucine rich repeat and Ig domain containing 3 (Lingo3). transcript variant 1. mRNA	0	0	0	0	0	0.006272	0	0	0	0	0	0	0	0	0	0	0	0	0	0.006746
NM_001013759.2	Gas2l2	growth arrest-specific 2 like 2 (Gas2l2). mRNA	0	0	0	0	0	0	0.0371723	0	0	0	0	0	0	0	0	0	0	0	0	0
NM_001013760.3	Cldn34b3	claudin 34B3 (Cldn34b3). mRNA	0	0	0	0	0	0	0	0	0	0	0	0	0	0	0	0	0	0	0	0
NM_001013761.2	Gmnc	geminin coiled-coil domain containing (Gmnc). transcript variant 1. mRNA	0	0	0	0	0	0	0	0	0	0	0	0	0	0	0	0	0	0	0	0
NM_001013762.2	Gm4952	predicted gene 4952 (Gm4952). transcript variant 1. mRNA	0	0	0	0	0	0	0	0	0	0	0	0	0	0	0	0	0	0	0	0
NM_001013764.2	Ces1a	carboxylesterase 1A (Ces1a). mRNA	0	0	0	0	0	0	0	0	0	0	0	0	0	0	0	0	0	0	0	0
NM_001013765.2	Zscan4c	zinc finger and SCAN domain containing 4C (Zscan4c). mRNA	0	0	0	0	0	0	0	0	0	0	0	0	0	0	0	0	0	0	0	0
NM_001013766.2	Samd3	sterile alpha motif domain containing 3 (Samd3). transcript variant 1. mRNA	0	0	0.004302	0.009196	0.0149727	0	0	0.0279231	0	0	0.0251786	0	0	0.0156934	0	0	0	0	0.0169217	0
NM_001013767.2	Capn11	calpain 11 (Capn11). mRNA	0	0	0	0	0	0	0	0	0	0	0	0	0	0	0	0	0	0	0	0
NM_001013769.1	Rsl1	regulator of sex limited protein 1 (Rsl1). mRNA	0.107004	0.200082	0.203828	0.158979	0.0239666	0.0317817	1.32337	0.0970542	0.100115	0.0106004	0.236444	0.168594	0.0581994	0.261249	0.0577472	0.0261426	0.0244001	0.0432202	0.0325036	0.0113945
NM_001013770.4	Lipo3	lipase. member O3 (Lipo3). mRNA	0	0.174813	0.094782	0.101307	0	0	0.316235	0	0.0478473	0	0.0462283	0.17063	0.007586	0.10805	0.0579576	0	0	0	0	0
NM_001013771.2	Gm973	predicted gene 973 (Gm973). transcript variant 1. mRNA	0	0	0	0	0	0	0	0	0	0	0	0	0	0	0	0	0	0	0	0
NM_001013773.3	Nxpe5	neurexophilin and PC-esterase domain family. member 5 (Nxpe5). mRNA	0	0.0331992	0.068251	0	0.0254511	0	0.0354882	0	0	0	0.0475547	0.0175526	0	0.017784	0	0	0	0	0	0
NM_001013774.2	Kpna7	karyopherin alpha 7 (importin alpha 8) (Kpna7). transcript variant 2. mRNA	0	0	0	0	0	0	0	0	0	0	0	0	0	0	0	0	0	0	0	0
NM_001013776.4	Fbxw24	F-box and WD-40 domain protein 24 (Fbxw24). mRNA	0	0	0	0	0	0	0	0	0	0	0	0	0	0	0	0	0	0	0	0
NM_001013777.2	Zfp488	zinc finger protein 488 (Zfp488). mRNA	0.101403	0.441435	0.321064	0.465924	0.136273	0.0376478	9.38676	0.130701	0.0677676	0.0652961	0.297909	0.063438	0.125348	0.159496	0.0875596	0.0495487	0.0780402	0.0341318	0.0436367	0.0377934
NM_001013778.2	Tvp23a	trans-golgi network vesicle protein 23A (Tvp23a). transcript variant 1. mRNA	0	0	0	0	0	0	0	0	0	0	0	0	0	0	0	0	0	0	0	0
NM_001013779.2	Aim2	absent in melanoma 2 (Aim2). mRNA	0.0275708	0.0805525	0.159686	0.0284464	0.0540338	0.0170603	0	0	0.0383865	0.0256061	0.0692303	0.0638827	0.0681627	0.0687704	0.0278986	0	0.009823	0	0	0
NM_001013780.1	Slc25a34	solute carrier family 25. member 34 (Slc25a34). mRNA	0	0.009536	0	0	0	0	0.0917428	0	0	0	0.008196	0	0	0	0	0.0159487	0	0	0.0165244	0
NM_001013783.2	Fam71b	family with sequence similarity 71. member B (Fam71b). mRNA	0.027991	0.0350486	0.0977864	0.143025	0.0985192	0.004949	0.911652	0.0429501	0.0267233	0.0594201	0.150612	0.138978	0.118631	0.0516304	0.0431601	0.0195389	0	0.008973	0	0.0106453
NM_001013784.1	Ccdc92b	coiled-coil domain containing 92B (Ccdc92b). mRNA	0.008753	0	0	0	0.004901	0	0	0	0	0	0	0	0	0.020548	0	0.106922	0.006237	0	0.0443127	0
NM_001013785.3	Akr1c19	aldo-keto reductase family 1. member C19 (Akr1c19). mRNA	0	0	0.01815	0	0	0	0	0	0	0	0	0	0	0	0	0	0	0	0	0
NM_001013786.3	Zscan26	zinc finger and SCAN domain containing 26 (Zscan26). transcript variant 2. mRNA	0	0.179009	0.318251	0.0782668	0.0245056	0	4.14139	0	0	0.0894197	0.258245	0.144499	0	0	0.106283	0	0	0	0	0
NM_001013787.1	Vmn1r209	vomeronasal 1 receptor 209 (Vmn1r209). mRNA	0	0	0	0	0	0	0	0	0	0	0	0	0	0	0	0	0	0	0	0
NM_001013792.2	Otulin	OTU deubiquitinase with linear linkage specificity (Otulin). mRNA	2.31411	2.56541	0	3.76521	1.47337	0.574223	19.5721	0.946286	1.92333	0.850951	4.70461	2.55165	3.0348	2.19233	2.01276	1.19101	0.996109	1.66063	1.72463	0.859975
NM_001013797.2	Spink6	serine peptidase inhibitor. Kazal type 6 (Spink6). transcript variant 1. mRNA	0	0	0	0	0	0	0	0	0	0	0	0	0	0	0	0	0	0	0	0
NM_001013799.1	Mettl21c	methyltransferase like 21C (Mettl21c). mRNA	0.0161274	0.0235594	0	0	0	0	0.151102	0	0	0	0	0	0	0	0	0	0	0	0	0
NM_001013802.3	Macrod2	mono-ADP ribosylhydrolase 2 (Macrod2). transcript variant 1. mRNA	0	0	0	0	0	0	0	0	0	0	0	0.0107188	0	0.0434407	0	0	0	0	0	0
NM_001013804.2	Flg2	filaggrin family member 2 (Flg2). mRNA	0	0	0	0	0	0	0	0	0	0	0	0	0	0	0	0	0	0	0	0
NM_001013806.2	Ankrd13c	ankyrin repeat domain 13c (Ankrd13c). transcript variant 1. mRNA	0.480898	1.37845	0.85561	1.25641	0.484247	0.312573	7.76818	0.272493	0.546891	0.280237	1.09084	0.882512	0.844228	0.832483	0.537049	0.175248	0.311009	0.206302	0.34269	0.161374
NM_001013810.2	Gm5591	predicted gene 5591 (Gm5591). mRNA	0	0	0	0	0	0	0	0	0	0	0	0	0	0	0	0	0	0	0	0
NM_001013811.3	Fam169b	family with sequence similarity 169. member B (Fam169b). transcript variant 2. mRNA	0	0.172507	0.163988	0	0	0.107683	0.824951	0	0	0.188561	0	0	0	0	0	0	0.212588	0	0	0
NM_001013813.4	Maml2	mastermind like transcriptional coactivator 2 (Maml2). transcript variant 1. mRNA	0.181884	0.183647	0.277132	0.237335	0.0913616	0.0595833	0.254784	0.169186	0.0580951	0.0877735	0.325742	0.237056	0.249632	0.416001	0.0288701	0	0	0.003001	0.0440099	0.0872285
NM_001013814.2	Amt	aminomethyltransferase (Amt). mRNA; nuclear gene for mitochondrial product	0.124064	0.231232	0.0715804	0.205983	0.143729	0	3.50053	0.040845	0	0	0.155762	0.123905	0.0899007	0.120518	0.0750347	0.0104519	0	0	0.0379023	0
NM_001013816.1	Gm5622	predicted gene 5622 (Gm5622). mRNA	0	0	0	0	0	0	0	0	0	0	0	0	0	0	0	0	0	0	0	0
NM_001013817.2	Sp140	Sp140 nuclear body protein (Sp140). mRNA	1.42753	2.66229	1.44096	2.17316	1.61897	1.36758	19.259	1.47017	5.43997	1.76324	1.81045	2.32122	1.22269	0.948386	0.992329	0.721433	2.49923	1.43905	2.07275	1.80371
NM_001013820.3	Slc22a28	solute carrier family 22. member 28 (Slc22a28). mRNA	0	0	0	0	0	0	0	0	0	0	0	0	0	0	0	0	0	0	0	0
NM_001013823.1	Krtap4-16	keratin associated protein 4-16 (Krtap4-16). mRNA	0	0	0	0	0	0	0	0	0	0	0	0	0	0	0	0	0	0	0	0
NM_001013824.3	Gm5662	predicted gene 5662 (Gm5662). mRNA	0	0	0	0	0	0	0	0	0	0	0	0	0	0	0	0	0	0	0	0
NM_001013826.2	Dupd1	dual specificity phosphatase and pro isomerase domain containing 1 (Dupd1). mRNA	0	0	0	0	0	0	0	0	0	0	0	0	0	0	0	0	0	0	0	0
NM_001013829.2	Shf	Src homology 2 domain containing F (Shf). transcript variant 2. mRNA	0.0111984	0.049077	0.057653	0.0308109	0.0376233	0	0.244817	0	0.0561292	0	0.112477	0.207578	0.221485	0	0.0453264	0	0.0478798	0	0.0425207	0.0447183
NM_001013832.2	Gpr31b	G protein-coupled receptor 31. D17Leh66b region (Gpr31b). mRNA	0.127709	0.0266515	0.258298	0.0501961	0.0612946	0.0677347	6.58098	0.39192	0.365776	0	0.114528	0.0634086	0.0225523	0.0642447	0.0246147	0.0891463	0.0780041	0.102348	0.334821	0.0607113
NM_001013833.3	Prkg1	protein kinase. cGMP-dependent. type I (Prkg1). transcript variant 1. mRNA	0	0	0	0	0	0	0	0	0	0	0	0	0	0	0	0	0	0	0	0
NM_001014390.2	Dyrk2	dual-specificity tyrosine-(Y)-phosphorylation regulated kinase 2 (Dyrk2). mRNA	0.106545	0.311288	0.348103	0.21422	0.211104	0.0709994	5.06805	0.479278	0.292118	0	0.318983	0.617173	0.126639	0.211644	0.221152	0	0.280333	0.0643686	0.202277	0.0545464
NM_001014394.2	Adgrf3	adhesion G protein-coupled receptor F3 (Adgrf3). mRNA	0	0	0	0	0	0	0	0	0	0	0	0	0	0	0	0	0	0	0	0
NM_001014395.2	Fbxw22	F-box and WD-40 domain protein 22 (Fbxw22). transcript variant 1. mRNA	0	0	0	0	0	0	0	0	0	0	0	0	0	0	0	0	0	0	0	0
NM_001014397.4	Zfp985	zinc finger protein 985 (Zfp985). mRNA	0	0	0	0	0	0	0.0386976	0	0	0	0	0	0.007658	0	0	0	0	0	0	0
NM_001014398.2	Trcg1	taste receptor cell gene 1 (Trcg1). mRNA	0	0	0	0	0	0	0.371079	0	0	0	0.004032	0.0148814	0	0	0	0	0	0	0	0
NM_001014399.2	Abi3bp	ABI gene family. member 3 (NESH) binding protein (Abi3bp). transcript variant 3. mRNA	0	0	0	0	0	0	0	0	0	0	0	0	0	0	0	0	0	0	0	0
NM_001014422.2	Abi3bp	ABI gene family. member 3 (NESH) binding protein (Abi3bp). transcript variant 4. mRNA	0	0	0	0	0	0	0	0	0	0	0	0	0	0	0	0	0	0	0	0
NM_001014423.2	Abi3bp	ABI gene family. member 3 (NESH) binding protein (Abi3bp). transcript variant 5. mRNA	0	0	0	0	0	0	0	0	0	0	0	0	0	0	0	0	0	0	0	0
NM_001014424.2	Abi3bp	ABI gene family. member 3 (NESH) binding protein (Abi3bp). transcript variant 2. mRNA	0	0	0	0	0	0	0	0	0	0	0	0	0	0	0	0	0	0	0	0
NM_001014761.2	Scn2b	sodium channel. voltage-gated. type II. beta (Scn2b). mRNA	0	0	0.101297	0.0845038	0	0	0	0	0	0	0	0	0.0450848	0	0	0	0	0	0	0
NM_001014836.3	4930404N11Rik	RIKEN cDNA 4930404N11 gene (4930404N11Rik). mRNA	0	0	0	0	0	0	0.0787037	0	0	0	0	0	0	0.0147901	0	0	0	0	0	0
NM_001014900.2	Zmynd12	zinc finger. MYND domain containing 12 (Zmynd12). mRNA	0.0174562	0	0	0	0.0195491	0	0.109035	0	0	0	0	0.0134822	0	0	0	0	0	0	0	0
NM_001014973.2	Snx13	sorting nexin 13 (Snx13). mRNA	0.172645	0.600781	0.485966	0.558039	0.405553	0.0868532	5.29544	0.127311	0.181354	0	0.579778	0.481332	0.286286	0.260315	0.206418	0	0	0	0.044413	0
NM_001014974.2	Ttll4	tubulin tyrosine ligase-like family. member 4 (Ttll4). mRNA	0.296054	0.41368	0.160149	0.4663	0.213825	0.0384969	9.80885	0.199705	0.133813	0	0.494247	0.123027	0.0914909	0.201453	0	0.086482	0	0.0698032	0.0923191	0
NM_001014976.2	Espl1	extra spindle pole bodies 1. separase (Espl1). transcript variant 1. mRNA	0.0581171	0	0	0.107206	0	0.006538	0.396012	0.0472905	0.13535	0	0.0298497	0.0382556	0.0424514	0.0279072	0.0463336	0.0371107	0.0188245	0.0177835	0.0401221	0.0246142
NM_001014981.1	Wdr7	WD repeat domain 7 (Wdr7). transcript variant 1. mRNA	0	0	0	0	0	0	0	0	0	0	0	0	0	0	0	0	0	0	0	0
NM_001014995.2	Fam189b	family with sequence similarity 189. member B (Fam189b). transcript variant 1. mRNA	0.136526	0.313408	0	0.816426	0.418122	0	1.87957	0	0.105516	0	0.531717	0.484189	0.299645	0.242016	0.236828	0	0.0555931	0	0.0634766	0
NM_001014996.2	Cenpj	centromere protein J (Cenpj). mRNA	0.119825	0	0	0.170335	0	0	1.74014	0	0.0400393	0	0	0.196661	0	0.0656365	0	0	0	0.0179255	0.0202212	0.0478491
NM_001014997.2	Klrh1	killer cell lectin-like receptor subfamily H. member 1 (Klrh1). transcript variant 1. mRNA	0	0	0	0	0	0	0.0636776	0	0	0	0	0	0	0	0	0	0	0	0	0
NM_001015039.1	Zfyve28	zinc finger. FYVE domain containing 28 (Zfyve28). mRNA	0	0	0	0	0	0	0	0	0	0	0	0.0662763	0	0	0.0178117	0	0	0	0	0
NM_001015046.3	Rap1gap2	RAP1 GTPase activating protein 2 (Rap1gap2). transcript variant 2. mRNA	0.206758	0.85155	0.800055	0.779894	0.829088	0	5.5074	0.23561	0.233264	0	0.417009	0	0.0461695	0.493211	0.327547	0	0	0	0	0.0639203
NM_001015099.2	G2e3	G2/M-phase specific E3 ubiquitin ligase (G2e3). transcript variant 1. mRNA	0	0.127272	0.18689	0.28329	0.0635675	0.0196036	1.97062	0.0378096	0.0779262	0	0.225395	0.212573	0.0375305	0.08677	0	0	0	0	0	0
NM_001015507.3	Dcaf1	DDB1 and CUL4 associated factor 1 (Dcaf1). transcript variant 3. mRNA	0	0	0	0.0309807	0	0.0418054	1.1605	0	0.017917	0	0	0.0614984	0.0397689	0	0	0	0.0320957	0.0108289	0	0.0107059
NM_001015681.2	E130308A19Rik	RIKEN cDNA E130308A19 gene (E130308A19Rik). transcript variant 2. mRNA	0.0188327	0.213212	0.109076	0.0842	0.0711809	0.0349598	0.683739	0.0646177	0.0419527	0.0116604	0.118222	0.0599995	0.0843892	0.0663171	0.0254088	0.0747679	0.0503252	0.0264124	0.0685284	0.0188009
NM_001015876.2	Tyw1	tRNA-yW synthesizing protein 1 homolog (S. cerevisiae) (Tyw1). transcript variant 1. mRNA	0.0459997	0.781172	0.432937	0.609077	0.186741	0	0	0.144107	0.0736515	0	0.494506	0.699451	0.430019	0.141735	0.271522	0	0	0.0580621	0.0727756	0.0306148
NM_001015889.2	Taf9	TATA-box binding protein associated factor 9 (Taf9). transcript variant 3. mRNA	0.196475	0.215262	0	0.15445	0.0942994	0.104207	3.74741	0.351723	0.336076	0.139028	0.731214	0.0487758	0.0693916	0.065892	0	0.102861	0.340018	0	0.0444059	0
NM_001017362.2	Arid3c	AT rich interactive domain 3C (BRIGHT-like) (Arid3c). transcript variant 1. mRNA	0	0	0	0	0	0	0.343627	0	0	0	0	0	0	0.00587	0	0	0.0142555	0	0	0
NM_001017393.3	Gm21943	predicted gene. 21943 (Gm21943). mRNA	0	0	0	0	0	0	0	0	0	0	0	0	0	0	0	0	0	0	0	0
NM_001017394.2	Gm20815	predicted gene. 20815 (Gm20815). mRNA	0	0	0	0	0	0	0	0	0	0	0	0	0	0	0	0	0	0	0	0
NM_001017407.1	Tbata	thymus. brain and testes associated (Tbata). transcript variant 5. mRNA	0.0375845	0.0549045	0.0120935	0.0387781	0.0210454	0	0.35214	0.0224275	0.0104657	0.0581769	0.0117968	0.0108856	0.0348447	0.0110291	0.0253542	0.0114781	0.0133913	0.0210846	0	0
NM_001017409.1	Tbata	thymus. brain and testes associated (Tbata). transcript variant 6. mRNA	0	0	0	0	0	0	0	0	0	0	0	0	0	0	0	0	0	0	0	0
NM_001017419.2	Tbata	thymus. brain and testes associated (Tbata). transcript variant 2. mRNA	0	0	0	0	0	0	0.11372	0	0	0	0	0	0	0	0	0	0	0	0	0
NM_001017426.2	Kdm6b	KDM1 lysine (K)-specific demethylase 6B (Kdm6b). mRNA	0.909055	0.745463	1.08421	1.07065	2.44676	0.522043	42.0775	1.48888	1.25817	0.514423	1.26688	1.39183	0.830505	1.76386	1.38563	0.393131	1.13294	0.578303	0.903899	0.510295
NM_001017427.1	Rasef	RAS and EF hand domain containing (Rasef). mRNA	0	0	0	0	0	0	0	0	0	0	0	0	0	0	0	0	0	0	0	0
NM_001017429.2	Cox17	cytochrome c oxidase assembly protein 17. copper chaperone (Cox17). mRNA	13.9593	13.0568	12.7964	16.0536	12.2139	9.24671	15.4939	16.1322	18.725	7.66056	18.3832	21.2681	15.9397	16.5739	14.4708	9.51985	6.72696	12.9578	15.7104	10.507
NM_001017433.2	Tbata	thymus. brain and testes associated (Tbata). transcript variant 1. mRNA	0	0	0	0	0	0	0	0	0	0	0	0	0	0	0	0	0	0	0	0
NM_001017441.2	Tbata	thymus. brain and testes associated (Tbata). transcript variant 4. mRNA	0	0	0	0	0	0	0	0	0	0	0	0	0	0	0	0	0	0	0	0
NM_001017525.1	Btbd11	BTB (POZ) domain containing 11 (Btbd11). transcript variant 2. mRNA	0.0575694	0.187605	0	0.225407	0	0.0274021	2.93204	0.0634207	0	0	0.0389191	0.0205216	0.15875	0.0675747	0.0597475	0.0135241	0.0126227	0.009937	0.0280246	0.0117892
NM_001017955.3	Zscan18	zinc finger and SCAN domain containing 18 (Zscan18). transcript variant 1. mRNA	0	0	0	0	0	0	0	0	0	0	0	0	0	0	0	0	0	0	0	0
NM_001017959.2	Lamp2	lysosomal-associated membrane protein 2 (Lamp2). transcript variant 1. mRNA	5.892	8.19937	8.1697	13.1925	6.87268	2.99427	7.69397	5.34251	3.5732	4.56692	17.1069	10.7071	3.233	5.86394	5.70269	1.53164	1.82882	3.91258	2.42379	4.1137
NM_001017966.2	Ddi2	DNA-damage inducible protein 2 (Ddi2). mRNA	0.875966	1.45676	1.11788	1.63737	1.06135	0.321543	13.1531	0.437066	0.755185	0.471885	1.47258	0.914488	0.599525	0.859742	0.590921	0.187411	0.243336	0.360922	0.385221	0.388662
NM_001017968.2	Zdhhc18	zinc finger. DHHC domain containing 18 (Zdhhc18). mRNA	2.45767	5.7965	3.21468	4.63772	3.02792	0.791784	66.1596	1.63724	1.32589	0.74656	4.03562	4.25842	3.5057	4.19903	2.83861	0.462171	0.701407	0.748898	1.09397	0.601867
NM_001017983.2	Foxred2	FAD-dependent oxidoreductase domain containing 2 (Foxred2). transcript variant 2. mRNA	0.0181986	0.0877308	0.201438	0.312943	0.120245	0.0315307	1.60846	0.0825324	0.0202702	0.0270428	0.13709	0.158126	0.0629889	0.119624	0.0540174	0.0111155	0.0155619	0.0122511	0.046067	0.024224
NM_001017985.3	C2cd3	C2 calcium-dependent domain containing 3 (C2cd3). mRNA	0.0437187	0.496185	0.62329	0.79882	0.375363	0	2.43667	0.228771	0.214758	0.188787	0.900739	0.566229	0.369982	0.753962	0.00605	0.112289	0	0	0.140462	0.129816
NM_001018002.1	Dppa4	developmental pluripotency associated 4 (Dppa4). transcript variant 2. mRNA	0	0	0	0	0	0	0.178625	0	0	0	0	0	0	0	0	0	0	0	0	0
NM_001018013.1	Izumo1	izumo sperm-egg fusion 1 (Izumo1). mRNA	0	0	0	0	0	0.0145178	0.146548	0	0	0	0	0	0	0	0	0	0	0	0	0
NM_001018019.2	Grxcr1	glutaredoxin. cysteine rich 1 (Grxcr1). mRNA	0.0241245	0	0	0	0	0	0	0	0	0	0.0201922	0	0	0	0	0.0196466	0	0	0	0
NM_001018031.2	Otol1	otolin 1 (Otol1). mRNA	0	0	0	0.0111495	0	0	0.0506239	0	0	0	0	0	0	0	0	0	0	0	0	0
NM_001018042.3	Sp3	trans-acting transcription factor 3 (Sp3). transcript variant 1. mRNA	1.62147	1.84062	1.38772	1.8943	1.1747	0.367199	23.4471	0.531163	1.10317	0	2.50796	1.28784	2.14126	1.15766	0.245266	0.273118	0	0.213341	0.26182	0
NM_001018063.2	Rtl8b	retrotransposon Gag like 8B (Rtl8b). mRNA	0.50218	0.663253	0.575511	0.558348	0.423718	0.0425669	0.79492	0.188828	0.0612978	0.0340744	0.665033	0.557876	0.527224	0.484484	0.306282	0	0.176474	0	0.139308	0.0824109
NM_001018079.2	Lce3f	late cornified envelope 3F (Lce3f). mRNA	0	0	0	0	0	0	0	0	0	0	0	0	0	0	0	0	0	0	0	0
NM_001018087.2	Ldoc1	regulator of NFKB signaling (Ldoc1). mRNA	0.0252005	0.0460171	0.0405438	0.0866696	0	0.038984	0.216435	0.007519	0.007017	0.0234047	0.0158196	0.007299	0.0233635	0.0295803	0	0.007696	0.008979	0.0141373	0.007974	0.0251581
NM_001024134.2	Trim15	tripartite motif-containing 15 (Trim15). transcript variant 2. mRNA	0	0	0	0	0	0.0352823	0	0	0	0	0	0	0	0	0	0	0	0	0	0
NM_001024135.2	Kbtbd7	kelch repeat and BTB (POZ) domain containing 7 (Kbtbd7). mRNA	0.266834	0.485836	0.442982	0.531997	0.485052	0.239292	2.5544	0.276914	0.585801	0.167607	0.44668	0.277771	0.327454	0.419881	0.245223	0.136997	0.104717	0.23213	0.249622	0.313999
NM_001024136.2	Anks6	ankyrin repeat and sterile alpha motif domain containing 6 (Anks6). transcript variant 2. mRNA	0	0	0	0	0	0	0	0	0	0	0.0397691	0.0112915	0.006024	0.00572	0	0	0	0	0.0185037	0
NM_001024137.1	Pla2g4d	phospholipase A2. group IVD (Pla2g4d). mRNA	0	0	0	0	0	0	0	0	0	0	0	0	0	0	0	0	0	0	0	0
NM_001024138.2	Gpr139	G protein-coupled receptor 139 (Gpr139). mRNA	0	0	0	0	0	0	0	0	0	0	0	0	0	0	0	0	0	0	0	0
NM_001024139.1	Adamts15	a disintegrin-like and metallopeptidase (reprolysin type) with thrombospondin type 1 motif. 15 (Adamts15). transcript variant 1. mRNA	0	0	0	0	0	0.007291	0	0	0	0	0	0	0.0145645	0	0	0	0	0	0	0
NM_001024141.4	Nxf3	nuclear RNA export factor 3 (Nxf3). mRNA	0	0	0	0	0	0	0	0	0	0	0	0	0	0	0.0158698	0	0.008382	0	0	0
NM_001024142.1	Fbxo10	F-box protein 10 (Fbxo10). transcript variant 2. mRNA	0	0.12092	0	0.0155279	0.0168544	0	0.846044	0.0987869	0	0	0.144076	0.0871783	0.0139529	0.0750786	0	0	0	0	0	0.005008
NM_001024145.3	Pla2g4f	phospholipase A2. group IVF (Pla2g4f). transcript variant 1. mRNA	0	0	0	0	0	0	0	0	0	0	0	0	0	0	0	0	0	0	0	0
NM_001024148.1	Ugt2a2	UDP glucuronosyltransferase 2 family. polypeptide A2 (Ugt2a2). mRNA	0	0	0	0	0	0	0.0210786	0	0	0	0	0	0	0	0	0.004122	0	0	0	0
NM_001024205.2	Nufip2	nuclear fragile X mental retardation protein interacting protein 2 (Nufip2). mRNA	0.575167	0.990303	1.0015	1.54078	0.789362	0.130271	17.4581	0.0914568	0.303904	0.248189	0.988555	0.676098	0.346645	0.888639	0.44538	0.117273	0.007201	0.127554	0.222762	0.098642
NM_001024206.2	Trappc1	trafficking protein particle complex 1 (Trappc1). mRNA	1.48108	3.02218	2.72323	3.65455	2.09307	0.538241	15.8591	0.91185	1.29617	0.451234	3.55666	2.56018	1.97612	2.62153	1.64935	0.344619	0.58634	0.263769	0.848016	0.422453
NM_001024225.2	Defa24	defensin. alpha. 24 (Defa24). mRNA	0	0	0	0	0	0	0	0	0	0	0	0	0	0	0	0	0	0	0	0
NM_001024230.2	Gm5431	predicted gene 5431 (Gm5431). mRNA	0.147378	0.34447	0.318673	0.34872	0.237669	0.153207	2.24614	0.0316597	0.46948	0.1825	0.192434	0.146836	0.0910897	0.138393	0.059652	0.104419	0.147029	0.0925989	0.227569	0.180479
NM_001024385.1	Crls1	cardiolipin synthase 1 (Crls1). transcript variant 1. mRNA	0.0677451	0.0395856	0.046503	0.360356	0.0708097	0	0	0	0	0.0671119	0	0.104645	0	0.201448	0.0853074	0	0	0.0709415	0	0
NM_001024458.4	Add1	adducin 1 (alpha) (Add1). transcript variant 1. mRNA	0.6044	0	0	0	0	0.180171	0	0.005265	0.287461	0	1.11608	1.07331	0.673501	0.753459	0	0.0107784	0.106887	0.0989965	0.326649	0.273063
NM_001024468.3	Bcat1	branched chain aminotransferase 1. cytosolic (Bcat1). transcript variant 1. mRNA	0	0.00326	0	0.006139	0	0	0	0.002663	0.008699	0.00829	0	0	0.001379	0.002619	0	0	0	0	0	0.0178212
NM_001024474.2	Diras2	DIRAS family. GTP-binding RAS-like 2 (Diras2). mRNA	0	0.294221	0.235896	0	0.207511	0	2.77395	0.16345	0	0.109739	0	0.203001	0	0	0.464668	0.0639689	0	0	0	0
NM_001024478.1	Cdhr3	cadherin-related family member 3 (Cdhr3). mRNA	0	0	0	0	0	0	0	0	0	0	0	0	0	0	0	0	0	0	0	0
NM_001024504.2	Dcun1d2	DCN1. defective in cullin neddylation 1. domain containing 2 (S. cerevisiae) (Dcun1d2). transcript variant 1. mRNA	0	0	0	0	0	0	0	0	0.0892816	0	0	0.006633	0	0	0	0	0	0	0	0
NM_001024508.3	Brd9	bromodomain containing 9 (Brd9). transcript variant 1. mRNA	0.282605	0.65845	0.603155	0.82676	0	0.0354168	1.2066	0.222003	0.486107	0	0.350319	0.745983	0.601394	0.340119	0.637087	0.00874	0.193736	0.0963275	0.126775	0
NM_001024512.2	Fam149b	family with sequence similarity 149. member B (Fam149b). transcript variant 1. mRNA	0	0	0	0	0	0	0	0	0	0	0	0	0	0	0	0	0	0	0	0
NM_001024526.2	Larp4	La ribonucleoprotein domain family. member 4 (Larp4). transcript variant 1. mRNA	0.256778	0.722864	0.476804	0.700967	0.100348	0.193646	10.68	0.129283	0.23536	0.0728686	0.569209	0.560877	0.181851	0.144423	0.0541314	0.130697	0.215381	0.0915317	0.142186	0.010681
NM_001024539.1	Shc2	SHC (Src homology 2 domain containing) transforming protein 2 (Shc2). mRNA	0.0110181	0.0128764	0.0283623	0.0121259	0.004936	0	0.763915	0.00526	0.0171812	0.005458	0.0110666	0.007659	0	0.0206928	0.0118924	0	0	0	0.0111562	0
NM_001024560.3	Snx32	sorting nexin 32 (Snx32). transcript variant 1. mRNA	0.0206659	0.181136	0	0.0710742	0	0.038363	0	0	0	0	0	0	0	0.0424507	0.167293	0.025245	0	0	0	0
NM_001024602.3	Cep170b	centrosomal protein 170B (Cep170b). mRNA	0	0	0	0	0	0	0.465437	0	0	0	0	0	0.133683	0	0	0	0	0	0	0
NM_001024604.2	Ankrd28	ankyrin repeat domain 28 (Ankrd28). mRNA	0.654821	0.48196	1.14673	1.71179	0.684568	0.315033	7.87692	0.559636	0.58013	0.269601	1.46133	0.717879	0.221512	0.577944	0.408975	0.159573	0.114567	0.242394	0.75672	0.459218
NM_001024606.2	Pdp2	pyruvate dehyrogenase phosphatase catalytic subunit 2 (Pdp2). mRNA	0.151332	0.34514	0.214651	0.233676	0.0587979	0	2.02554	0.0294867	0	0.0497176	0.213262	0.178899	0.194703	0.181258	0.004167	0	0	0	0.101632	0
NM_001024614.1	Cfap299	cilia and flagella associated protein 299 (Cfap299). mRNA	0	0	0	0	0.0110069	0	0	0	0	0	0	0	0	0	0	0	0	0	0	0
NM_001024616.2	Rabl6	RAB. member RAS oncogene family-like 6 (Rabl6). mRNA	0.878188	1.31896	0.925429	1.14015	0.45486	0.35661	24.6926	0.399576	0.507417	0.149528	1.10256	1.19862	0.93969	1.14678	0.651662	0.184383	0.504546	0.283277	0.368184	0.164383
NM_001024617.3	Inpp4b	inositol polyphosphate-4-phosphatase. type II (Inpp4b). transcript variant 2. mRNA	0.009886	0.0231072	0.00509	0.0136002	0	0	0.308755	0	0	0	0	0	0	0.002321	0	0	0	0	0	0
NM_001024618.2	Xirp2	xin actin-binding repeat containing 2 (Xirp2). transcript variant 1. mRNA	0	0	0	0	0	0	0	0	0	0	0	0	0	0	0	0	0	0	0	0
NM_001024619.3	Tsku	tsukushi. small leucine rich proteoglycan (Tsku). transcript variant 3. mRNA	0	0	0.026943	0	0	0	0.0871699	0	0	0	0	0	0.008626	0	0	0	0.009945	0	0.008832	0
NM_001024622.2	Pcnp	PEST proteolytic signal containing nuclear protein (Pcnp). transcript variant 4. mRNA	1.56868	3.31499	2.20523	2.88082	1.68001	0.720932	14.6498	0.9088	1.08991	1.34373	2.83471	2.46577	3.18634	3.64239	2.45548	0.706969	0.86822	1.1406	1.04572	1.12511
NM_001024624.2	Cdkl5	cyclin-dependent kinase-like 5 (Cdkl5). mRNA	0.016187	0	0.0416679	0.0296909	0.030213	0.006677	0.151661	0.0193183	0.0120197	0.006682	0.0203228	0.006251	0.00667	0.0380005	0.0145595	0	0	0.0121077	0.0204875	0.007182
NM_001024626.2	Zfp873	zinc finger protein 873 (Zfp873). transcript variant 2. mRNA	0	0.0723068	0.019602	0	0	0	0	0	0	0.00943	0	0.0441103	0.103544	0.0670379	0	0	0	0	0	0
NM_001024645.2	Carmil3	capping protein regulator and myosin 1 linker 3 (Carmil3). transcript variant 1. mRNA	0	0	0	0.005205	0	0	0	0	0.004214	0.004685	0	0	0.0187083	0.002221	0	0	0	0	0	0
NM_001024672.3	Methig1	methyltransferase hypoxia inducible domain containing 1 (Methig1). mRNA	0	0	0	0	0	0	0	0.0144254	0	0	0.0227632	0	0	0	0	0	0	0	0	0
NM_001024673.2	Ifnl2	interferon lambda 2 (Ifnl2). mRNA	0	0	0	0	0	0	0	0	0	0	0	0	0	0	0	0	0	0	0	0
NM_001024698.3	Cpa2	carboxypeptidase A2. pancreatic (Cpa2). mRNA	0	0	0	0	0	0	0	0	0	0	0	0.0302847	0	0	0	0	0	0	0	0
NM_001024699.2	Zbtb45	zinc finger and BTB domain containing 45 (Zbtb45). transcript variant 1. mRNA	0	0	0	0.0651486	0	0.0390718	0.295804	0	0	0.009774	0	0	0	0.19919	0.159735	0.009642	0	0.0974127	0.0399593	0.073543
NM_001024702.1	C1ql4	complement component 1. q subcomponent-like 4 (C1ql4). mRNA	0	0	0	0	0	0	0	0	0	0	0	0	0	0	0	0	0	0	0	0
NM_001024703.1	Mctp2	multiple C2 domains. transmembrane 2 (Mctp2). mRNA	0.218553	0.132111	0.238615	0.0953813	0.0995906	0.0596904	3.8553	0.305801	0.209854	0.201578	0.157066	0.244467	0.24594	0.0176922	0.180988	0	0.0236295	0.013529	0.211754	0.0280881
NM_001024705.2	Prpmp5	proline-rich protein MP5 (Prpmp5). mRNA	0	0	0	0.009382	0	0	0	0	0	0	0	0	0	0.0160111	0	0	0	0	0	0
NM_001024706.2	Gm5458	predicted gene 5458 (Gm5458). mRNA	0	0	0	0	0	0	0	0	0	0	0	0	0	0	0	0	0	0	0	0
NM_001024707.2	Lrp3	low density lipoprotein receptor-related protein 3 (Lrp3). mRNA	0	0	0	0	0	0	0	0	0	0	0	0	0	0	0	0	0	0	0	0
NM_001024709.3	Krtap10-10	keratin associated protein 10-10 (Krtap10-10). mRNA	0	0	0	0	0	0	0	0	0	0	0	0	0	0	0	0	0	0	0	0
NM_001024712.3	Gm3696	predicted gene 3696 (Gm3696). transcript variant 1. mRNA	0	0	0	0	0	0	0	0.004704	0	0	0	0	0	0	0	0	0	0	0	0
NM_001024714.3	Cma2	chymase 2. mast cell (Cma2). transcript variant 1. mRNA	0	0	0	0	0	0	0	0	0	0	0	0	0	0	0	0	0	0	0	0
NM_001024716.1	Triobp	TRIO and F-actin binding protein (Triobp). transcript variant 1. mRNA	1.0435	1.74356	1.42206	1.45428	1.50468	0.603493	13.515	1.99012	2.07767	0.536297	1.24589	1.57238	1.22668	1.74121	1.28825	0.529046	0.66583	1.07513	1.04881	0.576474
NM_001024717.2	Gal3st3	galactose-3-O-sulfotransferase 3 (Gal3st3). mRNA	0.0358607	0.120489	0.0646177	0.113465	0.0522084	0.0310659	3.3487	0.0727561	0.0119828	0.0266442	0.0630323	0.0332363	0.0664932	0.0168373	0.0290297	0.013142	0.0408867	0.008047	0.0181551	0
NM_001024719.2	Cyp2c67	cytochrome P450. family 2. subfamily c. polypeptide 67 (Cyp2c67). mRNA	0	0	0	0	0	0	0	0	0	0	0	0	0	0	0	0	0	0	0	0
NM_001024720.3	Hmcn1	hemicentin 1 (Hmcn1). mRNA	0	0	0	0	0	0	0	0	0	0	0	0	0	0	0	0	0	0	0	0
NM_001024721.2	Ifi214	interferon activated gene 214 (Ifi214). mRNA	0.62938	1.37418	1.0104	1.30339	0.363789	2.61307	7.2284	0.161533	3.56542	1.58389	0.951623	1.29365	0.702711	1.04857	0.42001	0.826705	1.8422	1.54139	2.72382	0.945858
NM_001024726.2	Zfp607a	zinc finger protein 607A (Zfp607a). mRNA	0.221985	0.30242	0.199035	0.367142	0.131283	0	7.49367	0.113115	0.0416719	0	0.137785	0.21383	0.0801631	0.322047	0.151432	0	0	0.0111939	0	0
NM_001024728.2	Rps23rg1	ribosomal protein S23. retrogene 1 (Rps23rg1). mRNA	0.0108047	0.0157838	0	0	0	0	0	0	0	0	0	0.0125174	0	0	0	0	0	0	0	0
NM_001024806.2	Cebpz	CCAAT/enhancer binding protein zeta (Cebpz). mRNA	0.614352	1.25707	1.03592	1.37815	0.767119	0.498034	13.277	0.998881	0.712894	0.485085	1.27388	1.3714	0.994925	0.655795	0.285918	0.219652	0.701675	0.264188	0.758602	0.373261
NM_001024837.2	Adarb1	adenosine deaminase. RNA-specific. B1 (Adarb1). transcript variant 2. mRNA	0	0	0.003414	0	0	0	0	0	0	0	0	0	0	0	0	0	0	0	0	0
NM_001024838.2	Adarb1	adenosine deaminase. RNA-specific. B1 (Adarb1). transcript variant 6. mRNA	0.0210858	0	0.166226	0	0	0.166355	0	0	0	0	0.122438	0.148097	0	0	0	0.0740538	0	0	0	0.0789384
NM_001024841.3	Gm128	predicted gene 128 (Gm128). mRNA	0	0.0870254	0.0153349	0.0163906	0.013343	0	0.911652	0.0142193	0	0	0	0.0276065	0	0	0	0	0	0	0	0
NM_001024842.1	Hoxc11	homeobox C11 (Hoxc11). mRNA	0	0	0	0	0	0	0	0	0	0	0	0	0	0	0	0	0	0	0	0
NM_001024846.2	Zfp62	zinc finger protein 62 (Zfp62). transcript variant 2. mRNA	0	0	0	0	0	0	0.0773679	0	0	0	0	0	0	0	0	0	0	0	0	0
NM_001024848.2	Apol7b	apolipoprotein L 7b (Apol7b). mRNA	0.574113	0.149354	0.035428	0.146058	0.673773	0	1.84213	0	0.0218994	0.189907	0.335714	0.637787	0	0.350793	0.0583591	0.0240179	0.128898	0.0176478	0.0696776	0.183197
NM_001024849.3	Gm14325	predicted gene 14325 (Gm14325). mRNA	0.227201	0.41342	0.315511	0.44964	0.0669582	0.0665939	2.56441	0.0309207	0.0155389	0.0148077	0.292757	0.226274	0.275924	0.198846	0.142512	0.0146075	0.0113615	0.0178888	0.0479269	0.0185699
NM_001024850.2	Rhox10	reproductive homeobox 10 (Rhox10). mRNA	0	0	0	0	0	0	0	0	0	0	0	0	0	0	0	0	0	0	0	0
NM_001024851.3	Ankrd34a	ankyrin repeat domain 34A (Ankrd34a). mRNA	0	0	0.0261512	0.0139757	0	0	0.10576	0	0	0	0	0	0	0	0	0	0	0	0	0
NM_001024853.1	Timm9	translocase of inner mitochondrial membrane 9 (Timm9). transcript variant 2. mRNA; nuclear gene for mitochondrial product	0.0966189	0.0384937	0.226102	0	0	0	1.09727	0	0	0.0652608	0.0551386	0	0.0434307	0	0	0	0	0	0.0444683	0.0701499
NM_001024854.1	Timm9	translocase of inner mitochondrial membrane 9 (Timm9). transcript variant 3. mRNA; nuclear gene for mitochondrial product	0	0.188823	0.0277273	0.311179	0.193006	0.106643	0.201842	0	0.191961	0	0	0.124789	0	0.0505739	0	0.0789488	0.353081	0.0241707	0	0.143377
NM_001024856.2	Ttbk2	tau tubulin kinase 2 (Ttbk2). transcript variant 2. mRNA	0.150769	0.0963585	0	0	0	0	0.760255	0	0	0	0	0	0	0	0	0	0	0	0	0
NM_001024857.2	Ttbk2	tau tubulin kinase 2 (Ttbk2). transcript variant 3. mRNA	0	0.118943	0.103779	0	0.107119	0	0.807303	0	0.0915704	0	0.110165	0.114477	0	0.120625	0.168512	0.0618021	0	0.0292687	0	0
NM_001024910.4	Septin10	septin 10 (Septin10). transcript variant 1. mRNA	0.100794	0	0	0	0	0.0293502	0.0555509	0	0	0	0.104215	0.0412134	0	0.180946	0	0	0.0169	0.0266091	0	0
NM_001024911.3	Septin10	septin 10 (Septin10). transcript variant 2. mRNA	0.0160022	0.163635	0.077235	0.121076	0	0	0.27487	0	0.0356474	0	0.0502268	0.0370777	0.089014	0.0187833	0	0.009774	0	0	0	0
NM_001024917.1	N4bp2	NEDD4 binding protein 2 (N4bp2). mRNA	0	0	0	0	0.0239574	0.0321477	0	0.029178	0.0306355	0.0340595	0.103596	0	0	0	0	0	0	0	0	0
NM_001024918.1	Rfx4	regulatory factor X. 4 (influences HLA class II expression) (Rfx4). transcript variant 1. mRNA	0	0	0	0	0	0	0	0	0	0	0	0	0	0	0	0	0	0	0	0
NM_001024919.1	Bod1	biorientation of chromosomes in cell division 1 (Bod1). mRNA	0.248784	0.59966	0.45629	0.513369	0.139306	0.0461827	6.00214	0.0890727	0.152406	0.0308073	0.327965	0.353071	0.44592	0.321223	0.142654	0.0607816	0.283651	0.0418696	0.133823	0.0827881
NM_001024920.1	Trp53i13	transformation related protein 53 inducible protein 13 (Trp53i13). mRNA	0.141038	0.393335	0.214532	0	0.236922	0.0158676	2.30249	0.137717	0.0428434	0	0.233415	0.453051	0.499254	0.233275	0.259482	0.0626504	0.0913665	0.0287713	0.048684	0
NM_001024922.2	Ddx49	DEAD box helicase 49 (Ddx49). transcript variant 1. mRNA	0.849081	1.38629	0.739268	0.658466	0.50807	0.22149	9.03419	0.412286	0.704663	0.314398	1.02944	1.16691	1.12676	1.06016	0.718788	0.264388	0.605051	0.36892	0.284468	0.443216
NM_001024926.3	Cyb5d2	cytochrome b5 domain containing 2 (Cyb5d2). mRNA	0.190294	0.256603	0.277893	0.206406	0.299173	0.0181154	2.05722	0.0174696	0.0407606	0.0725059	0.18378	0.267095	0.158328	0.201889	0.172807	0.0402332	0.0417239	0.0205295	0.0277904	0.0389689
NM_001024927.2	Pitpnm3	PITPNM family member 3 (Pitpnm3). transcript variant 1. mRNA	0	0	0	0	0	0	0	0	0	0	0	0	0	0	0	0	0	0	0	0
NM_001024928.2	Zfp667	zinc finger protein 667 (Zfp667). mRNA	0	0.0209089	0	0.0459436	0.0133576	0	0.178804	0	0	0	0	0	0.0235905	0.0280009	0.012874	0	0.0135992	0	0.0241541	0
NM_001024931.2	Rbfox3	RNA binding protein. fox-1 homolog (C. elegans) 3 (Rbfox3). transcript variant 3. mRNA	0	0	0	0	0	0	0	0	0	0	0	0	0	0	0	0	0	0	0	0
NM_001024932.2	Pilrb2	paired immunoglobin-like type 2 receptor beta 2 (Pilrb2). mRNA	0.23262	0.297341	0.467813	0.30001	0.575294	0.0599753	3.60221	0.150377	0	0.126025	0.480673	0.426701	0.0359439	0.466458	0.464234	0.0177602	0	0.0108748	0	0.0645079
NM_001024945.1	Qsox1	quiescin Q6 sulfhydryl oxidase 1 (Qsox1). transcript variant 1. mRNA	1.08209	0.891992	1.56516	2.03797	1.94469	0.828997	9.34986	1.11	1.24831	1.46439	2.88532	2.85646	0.834415	1.10685	1.24095	0.528741	0.528748	0.933688	0.939132	0.809341
NM_001024950.2	Zfp563	zinc finger protein 563 (Zfp563). mRNA	0	0	0.007063	0.007549	0	0	0	0	0	0	0	0	0.003392	0	0	0.003352	0	0	0	0
NM_001024952.2	Rc3h1	RING CCCH (C3H) domains 1 (Rc3h1). mRNA	0.657723	1.23733	1.10859	1.69913	0.679579	0.236219	18.83	0.460343	0.461524	0.291515	1.40391	0.868866	0.591836	0.758963	0.488226	0.15836	0.158686	0.166865	0.310034	0.245602
NM_001024954.2	Pbx4	pre B cell leukemia homeobox 4 (Pbx4). transcript variant 1. mRNA	0	0	0	0	0	0	2.03157	0	0	0	0	0	0	0.0576266	0	0	0	0	0	0
NM_001024955.2	Pik3r1	phosphoinositide-3-kinase regulatory subunit 1 (Pik3r1). transcript variant 1. mRNA	0.115483	0.379028	0.35518	0.425021	0.196512	0.0946592	2.41223	0.182569	0.567968	0.118861	0.13934	0.154639	0.513539	0.392576	0.224606	0.0897723	0.205197	0.030289	0.265751	0.0199633
NM_001025067.2	Lrig2	leucine-rich repeats and immunoglobulin-like domains 2 (Lrig2). transcript variant 1. mRNA	0.156987	0.175998	0.202054	0.381703	0	0.030121	0.433275	0	0	0	0.340718	0.172003	0.201579	0.332829	0.116575	0.0178392	0	0.0191156	0	0
NM_001025074.2	Ntrk2	neurotrophic tyrosine kinase. receptor. type 2 (Ntrk2). transcript variant 1. mRNA	0	0	0.0683179	0	0	0	0	0	0	0	0	0	0	0	0	0	0	0	0	0
NM_001025083.2	Rhox12	reproductive homeobox 12 (Rhox12). mRNA	0	0.0273642	0	0	0	0	0	0	0	0	0	0	0.0115776	0	0	0	0	0	0	0
NM_001025084.2	Rhox1	reproductive homeobox 1 (Rhox1). mRNA	0	0	0	0	0	0	0	0	0	0	0	0	0	0	0	0	0	0	0	0
NM_001025085.3	Gm5797	predicted gene 5797 (Gm5797). mRNA	0	0	0	0	0	0	0.0274318	0	0	0	0.0110277	0	0	0	0	0	0	0	0	0
NM_001025086.2	Rhox7a	reproductive homeobox 7A (Rhox7a). mRNA	0	0	0	0	0	0	0.0556451	0	0	0	0	0	0	0	0	0	0	0	0	0
NM_001025093.2	Atf2	activating transcription factor 2 (Atf2). transcript variant 1. mRNA	0	0	0	0	0	0	0	0	0	0	0	0	0	0	0	0	0	0	0	0
NM_001025102.2	Arl14ep	ADP-ribosylation factor-like 14 effector protein (Arl14ep). transcript variant 1. mRNA	0.177367	0.537543	0.258951	0.644598	0.127481	0.0655232	4.25786	0.120056	0.241786	0.0655633	0.129622	0	0.16362	0	0	0	0.086776	0	0.0569599	0.0493325
NM_001025103.2	Cracr2b	calcium release activated channel regulator 2B (Cracr2b). mRNA	0.0467188	0.0758313	0	0.0357056	0.063947	0.006424	1.54013	0.0371708	0.0173456	0	0.117311	0.0541247	0.250254	0.0609315	0.0630324	0	0.0221944	0.005824	0	0
NM_001025156.2	Ccdc93	coiled-coil domain containing 93 (Ccdc93). transcript variant 1. mRNA	0.248072	0.365909	0.444833	0.651059	0.314228	0.019374	6.57036	0.1121	0.0925505	0.0119298	0.823993	0	0.440625	0.515936	0.164098	0.0147106	0.0274602	0.010809	0.129554	0.006412
NM_001025163.1	Zfp78	zinc finger protein 78 (Zfp78). transcript variant 1. mRNA	0	0.0215411	0	0	0	0	0.155428	0	0	0	0.0416551	0	0.0364558	0.0649073	0.0323292	0	0	0	0	0
NM_001025192.3	Cxadr	coxsackie virus and adenovirus receptor (Cxadr). transcript variant 1. mRNA	0	0.004597	0.0729001	0.0194796	0.0863367	0.005841	0	0	0	0	0.0395064	0	0.0233383	0	0.0466999	0	0	0	0.0159306	0
NM_001025240.2	Adam34l	a disintegrin and metallopeptidase domain 34 like (Adam34l). mRNA	0	0	0	0	0	0	0	0	0	0	0	0	0	0	0	0	0	0	0	0
NM_001025241.3	Gm20747	predicted gene. 20747 (Gm20747). mRNA	0	0	0	0	0	0	0	0	0	0	0	0	0	0	0	0	0	0	0	0
NM_001025244.3	Krtap31-2	keratin associated protein 31-2 (Krtap31-2). mRNA	0	0	0	0	0	0	0	0	0	0	0	0	0	0	0	0	0	0	0	0
NM_001025245.1	Mbp	myelin basic protein (Mbp). transcript variant 8. mRNA	2.58173	4.57831	3.56375	6.02853	3.35518	0.346262	10.8717	1.08198	0.791249	0.602954	5.69121	4.58226	2.50415	3.80883	2.85082	0.479393	0.346973	0.485155	0.38632	0.548971
NM_001025246.2	Trp53i11	transformation related protein 53 inducible protein 11 (Trp53i11). transcript variant 4. mRNA	0.430945	2.24566	0.819571	1.08393	0.378167	0.03582	23.7739	0.759948	0.770148	0.127438	1.2315	1.20716	1.16878	1.6421	0.659527	0.373216	0.783765	0.108249	0.521012	0.115581
NM_001025250.3	Vegfa	vascular endothelial growth factor A (Vegfa). transcript variant 1. mRNA	0	0	0	0	0	0	0.462637	0	0	0	0	0	0	0	0	0	0	0	0.0218737	0
NM_001025251.2	Mbp	myelin basic protein (Mbp). transcript variant 1. mRNA	0.180271	0.0292606	0	0.198396	0.0538361	0.1289	0	0	0	0.198429	0	0.0742571	0.133704	0.0564271	0.270244	0	0.137025	0	0	0
NM_001025254.2	Mbp	myelin basic protein (Mbp). transcript variant 2. mRNA	0.164841	0.385287	0.297028	0	0.290753	0.1122	1.32565	0.201647	0	0.224538	0	0	0.101883	0.295072	0	0.0100683	0	0.16183	0.146044	0.268787
NM_001025255.2	Mbp	myelin basic protein (Mbp). transcript variant 3. mRNA	0	0	0	0.148588	0	0	0.181638	0	0	0	0	0.0288768	0	0.126783	0	0	0	0.0745761	0	0.210128
NM_001025256.2	Mbp	myelin basic protein (Mbp). transcript variant 4. mRNA	0.292897	0	0.273174	0.537242	0.351783	0.105066	0	0.263433	0	0	0	0.516367	0.0944507	0.149479	0.131724	0.0414835	0.0967962	0.009525	0.0698441	0.0226012
NM_001025257.3	Vegfa	vascular endothelial growth factor A (Vegfa). transcript variant 3. mRNA	0	0.0153069	0.0269726	0.032433	0.0176018	0	0.760846	0.0875362	0.0291774	0	0.006578	0.0151741	0	0.0122993	0	0	0	0.008817	0	0
NM_001025258.2	Mbp	myelin basic protein (Mbp). transcript variant 5. mRNA	0	0	0	0	0	0.120127	1.83209	0	0.202131	0	0	0.22491	0	0	0.284701	0	0.180443	0	0	0.190999
NM_001025259.2	Mbp	myelin basic protein (Mbp). transcript variant 6. mRNA	0	0.0773365	0.420184	0.19421	0	0	2.30094	0	0	0	0.664663	0.153331	0	0.186423	0	0	0	0.084147	0	0.035234
NM_001025260.2	H2al1e	H2A histone family member L1E (H2al1e). mRNA	0	0	0	0	0	0	0	0	0	0	0	0	0	0	0	0	0	0	0	0
NM_001025261.2	Tpd52	tumor protein D52 (Tpd52). transcript variant 1. mRNA	0	0	0	0	0	0	0	0	0	0	0	0	0	0	0	0	0	0	0	0
NM_001025262.2	Tpd52	tumor protein D52 (Tpd52). transcript variant 2. mRNA	0	0	0	0	0	0	0	0	0	0	0	0	0	0	0	0	0	0	0	0
NM_001025263.2	Tpd52	tumor protein D52 (Tpd52). transcript variant 3. mRNA	0	0	0	0	0	0	0.807069	0	0	0.0280004	0	0	0	0.007583	0	0	0	0	0	0
NM_001025264.2	Tpd52	tumor protein D52 (Tpd52). transcript variant 4. mRNA	0	0	0	0.0935781	0.155986	0	1.24937	0	0.0216475	0	0	0	0	0	0	0	0	0	0.0102494	0
NM_001025286.2	Nkain2	Na+/K+ transporting ATPase interacting 2 (Nkain2). transcript variant 2. mRNA	0	0	0.0182825	0	0	0	0	0	0	0	0	0	0	0	0	0	0	0	0	0
NM_001025296.2	Dffa	DNA fragmentation factor. alpha subunit (Dffa). transcript variant 1. mRNA	0.539559	1.23935	0.74471	0.75691	0.508842	0.13179	9.92211	0.326203	0.403287	0.167036	1.1008	1.14737	1.0575	0.695832	0.478925	0.156105	0.242834	0.17524	0.22464	0.137025
NM_001025305.2	Tfap2b	transcription factor AP-2 beta (Tfap2b). transcript variant 2. mRNA	0	0	0	0	0	0	0	0	0	0	0	0	0	0	0	0	0	0	0	0
NM_001025307.2	Stx3	syntaxin 3 (Stx3). transcript variant B. mRNA	0.0289781	0.160862	0	0.0159458	0.0551692	0	0	0.0449588	0.006455	0.007177	0.0945932	0.10743	0	0.0612259	0.0273678	0	0	0.0195077	0	0
NM_001025309.1	Pja2	praja ring finger ubiquitin ligase 2 (Pja2). transcript variant 1. mRNA	0.290293	0.986775	0.687383	0.693743	0.456388	0.0529672	6.50322	0.0532998	0.279811	0	0.509314	0.52818	0.41405	0.489275	0.426809	0.113659	0.108735	0.0396691	0.141314	0.0767857
NM_001025310.2	St6galnac6	ST6 (alpha-N-acetyl-neuraminyl-2.3-beta-galactosyl-1.3)-N-acetylgalactosaminide alpha-2.6-sialyltransferase 6 (St6galnac6). transcript variant 2. mRNA	0.0734972	0	0	0	0.115233	0	0.378739	0	0	0	0	0	0.222589	0.0431353	0	0	0	0	0	0
NM_001025311.2	St6galnac6	ST6 (alpha-N-acetyl-neuraminyl-2.3-beta-galactosyl-1.3)-N-acetylgalactosaminide alpha-2.6-sialyltransferase 6 (St6galnac6). transcript variant 3. mRNA	0	0.318005	0.309674	0	0	0	1.64598	0.036463	0.127615	0.0472925	0.210974	0	0	0.0986224	0.0103053	0.0279919	0.108859	0.0557044	0.120843	0.0305013
NM_001025312.1	Dclre1b	DNA cross-link repair 1B (Dclre1b). transcript variant 2. mRNA	0.109914	0.0802827	0.144188	0.122128	0.151498	0	2.12565	0	0.0753388	0.154431	0.265379	0.235085	0.198578	0.0793948	0.222442	0	0.358484	0.0782617	0.315684	0.303864
NM_001025313.1	Tapbp	TAP binding protein (Tapbp). transcript variant 1. mRNA	3.29907	6.41963	3.88958	6.44409	3.70532	2.9951	58.1601	2.5767	8.05504	4.16416	5.11751	5.78471	4.85358	6.10394	2.92584	3.10035	4.11635	5.31644	3.98611	2.41609
NM_001025351.1	Defb46	defensin beta 46 (Defb46). mRNA	0	0	0	0	0	0	0	0	0	0	0	0	0	0	0	0	0	0	0	0
NM_001025353.2	Gm6040	predicted gene 6040 (Gm6040). mRNA	0	0	0	0	0	0	0	0	0	0	0	0	0	0	0	0	0	0	0	0
NM_001025358.2	Klc1	kinesin light chain 1 (Klc1). transcript variant b. mRNA	0	0	0	0	0	0	0	0	0	0	0.0271473	0	0	0.0169204	0	0	0	0	0	0
NM_001025359.2	Klc1	kinesin light chain 1 (Klc1). transcript variant c. mRNA	0.0213851	0	0.0183495	0.0196127	0.0758387	0	0	0.0510437	0	0	0.116345	0.0412917	0.0528698	0	0.120218	0	0	0	0	0
NM_001025360.2	Klc1	kinesin light chain 1 (Klc1). transcript variant d. mRNA	0.0909292	0.388278	0	0.16839	0.007833	0	0	0.0876499	0	0	0.136116	0.433528	0.172925	0.2422	0.0471848	0.0341775	0.0598115	0.0706299	0.137219	0.0791381
NM_001025361.2	Klc1	kinesin light chain 1 (Klc1). transcript variant e. mRNA	0	0.0312272	0.036684	0.176442	0	0	0.344929	0	0	0.0441179	0.116298	0	0.0484443	0	0.0528746	0	0	0	0	0
NM_001025362.2	Klc1	kinesin light chain 1 (Klc1). transcript variant g. mRNA	0.0227105	0	0.0292302	0	0	0	0.553233	0.021683	0	0.0112491	0.0171078	0.0157864	0	0.0746411	0.0796659	0	0	0	0	0
NM_001025363.2	Klc1	kinesin light chain 1 (Klc1). transcript variant f. mRNA	0	0	0	0	0	0.0450438	0	0	0	0	0	0	0	0.0256338	0.0392854	0	0	0	0	0.0193792
NM_001025364.3	Rtn2	reticulon 2 (Z-band associated protein) (Rtn2). transcript variant C. mRNA	0.032434	0	0.0417451	0.0446188	0.0181614	0	0.303884	0.0387082	0.036126	0.140573	0	0.0563632	0	0	0	0	0	0	0.0205254	0.0215862
NM_001025365.2	Miip	migration and invasion inhibitory protein (Miip). transcript variant 2. mRNA	0	0.139811	0.234046	0	0.1179	0	1.47957	0	0.186552	0	0	0.116422	0.124222	0.20783	0	0	0.0272801	0.0429526	0	0
NM_001025371.2	Serinc4	serine incorporator 4 (Serinc4). transcript variant 1. mRNA	0	0	0	0	0	0	3.22448	0	0	0	0	0	0.0210605	0.0399967	0	0	0	0	0	0
NM_001025372.2	Adcyap1r1	adenylate cyclase activating polypeptide 1 receptor 1 (Adcyap1r1). transcript variant 2. mRNA	0	0	0.0127708	0	0	0	0.0309885	0.003383	0	0	0	0	0.0105132	0	0	0	0	0	0	0
NM_001025373.2	Zfp943	zinc finger prtoein 943 (Zfp943). mRNA	0.505715	1.0193	0.869231	1.03915	0.394293	0.0396109	18.6829	0.171895	0.163993	0.015854	0.502314	0.552508	0.530176	0.548522	0.323878	0.0781985	0.0912329	0.129282	0.0931745	0.0511253
NM_001025375.2	Wdr61	WD repeat domain 61 (Wdr61). transcript variant 1. mRNA	0.144747	0.21145	0.270982	0.63358	0.397885	0.105851	4.89045	0.0471129	0.549625	0.179242	0.536928	0.769859	0.577447	0.177626	0.124276	0.0160745	0.450091	0.0295279	0.333094	0.192671
NM_001025376.2	Wdr61	WD repeat domain 61 (Wdr61). transcript variant 3. mRNA	0.0717802	0.115344	0	0.0394986	0	0.0532994	0.515606	0	0	0	0	0	0	0.126383	0	0	0.1023	0	0.0726801	0
NM_001025378.2	Orc2	origin recognition complex. subunit 2 (Orc2). transcript variant b. mRNA	0	0.105551	0	0.10735	0	0	0	0	0	0	0	0.0535729	0.0428717	0	0.144276	0	0	0	0	0
NM_001025379.1	Sema3g	sema domain. immunoglobulin domain (Ig). short basic domain. secreted. (semaphorin) 3G (Sema3g). mRNA	0.009503	0.0173531	0.036694	0	0.005321	0	0	0.005671	0.005292	0	0	0.0385337	0	0.0501966	0.006411	0	0	0	0.006014	0
NM_001025380.3	Adam39	a disintegrin and metallopeptidase domain 39 (Adam39). mRNA	0	0	0	0	0	0	0	0	0	0	0	0	0	0	0	0	0	0	0	0
NM_001025381.2	Gpr17	G protein-coupled receptor 17 (Gpr17). mRNA	0	0	0	0	0	0	0	0	0	0	0	0	0	0	0	0	0	0	0	0
NM_001025382.2	Insyn2b	inhibitory synaptic factor family member 2B (Insyn2b). mRNA	0.0163046	0	0.0293793	0	0.005478	0.008071	0.310617	0	0	0.0141332	0.0204704	0.0188892	0.0181392	0.0191382	0.010999	0	0	0	0.006191	0
NM_001025383.2	Gm14685	predicted gene 14685 (Gm14685). mRNA	0	0	0	0	0.007073	0	0.0197256	0	0	0	0	0	0	0	0	0	0	0	0	0
NM_001025384.3	DXBay18	DNA segment. Chr X. Baylor 18 (DXBay18). mRNA	0	0	0	0	0	0	0	0	0	0	0	0	0	0	0	0	0	0	0	0
NM_001025385.1	Tas2r137	taste receptor. type 2. member 137 (Tas2r137). mRNA	0	0	0	0	0	0	0	0	0	0	0	0	0	0	0	0	0	0	0	0
NM_001025386.1	Olfr243	olfactory receptor 243 (Olfr243). mRNA	0	0	0	0	0	0	0	0	0	0	0	0	0	0	0	0	0	0	0	0
NM_001025388.2	Eno1b	enolase 1B. retrotransposed (Eno1b). mRNA	6.16689	12.8146	7.60387	10.2722	8.92572	1.84325	14.0015	5.10076	4.41649	2.33168	12.3017	15.5008	8.39899	9.9634	8.17915	1.47259	2.80424	2.44797	2.61016	1.73721
NM_001025391.2	Sufu	SUFU negative regulator of hedgehog signaling (Sufu). transcript variant 2. mRNA	0.476397	0.472443	0.266699	0.905795	0.0737379	0.038346	2.80632	0	0.235114	0.0623504	0.520312	0.641658	0.524258	0.75241	0.3266	0.0520447	0.0551997	0	0	0.0360885
NM_001025392.1	Bclaf1	BCL2-associated transcription factor 1 (Bclaf1). transcript variant 1. mRNA	0.189466	0.485533	0.516647	1.51527	0	0	10.0643	0.0440736	0	0	0.286256	0	0.523987	0.196009	0.277288	0.0274598	0.18078	0.171143	0	0
NM_001025393.1	Bclaf1	BCL2-associated transcription factor 1 (Bclaf1). transcript variant 3. mRNA	0.176563	0.361581	0.216631	0.133932	0.537757	0.0122527	12.1571	0.0925582	0.136008	0	0.136734	0	0.126466	0.323463	0.187011	0.0604724	0.242229	0.164775	0.215116	0.142769
NM_001025395.2	Src	Rous sarcoma oncogene (Src). transcript variant 2. mRNA	0	0.343873	0	0.426583	0	0	0	0	0.657999	0.330735	0.679173	0	0	0	0	0	0	0	0	0.283204
NM_001025426.2	Depdc5	DEP domain containing 5 (Depdc5). transcript variant 1. mRNA	0	0	0	0	0	0	0	0	0	0	0	0	0	0	0	0	0	0	0	0
NM_001025427.3	Hmga1	high mobility group AT-hook 1 (Hmga1). transcript variant 2. mRNA	0.239923	0.716211	0.389355	1.06192	0.140185	0.426014	0.961062	0.385929	0.0464753	0.155009	0.3929	0.858036	0.283683	0.899961	0.0703697	0.18477	0.669005	0	0.244251	0.48598
NM_001025428.2	Spag9	sperm associated antigen 9 (Spag9). transcript variant 2. mRNA	0	0	0	0	0	0	0	0	0	0	0	0	0	0	0	0	0	0	0	0
NM_001025429.2	Spag9	sperm associated antigen 9 (Spag9). transcript variant 3. mRNA	0	0	0	0	0	0	0	0	0	0	0	0	0	0	0	0	0	0	0	0
NM_001025430.2	Spag9	sperm associated antigen 9 (Spag9). transcript variant 4. mRNA	0	0	0	0	0	0	0	0	0	0	0	0	0	0	0	0	0	0	0	0
NM_001025431.1	Btbd3	BTB (POZ) domain containing 3 (Btbd3). transcript variant 2. mRNA	0.0168515	0.0328229	0.154234	0	0	0	0.491204	0	0.004171	0	0.0470158	0.0455533	0	0.0527474	0	0	0	0	0	0
NM_001025432.1	Crebbp	CREB binding protein (Crebbp). mRNA	0.428119	0.657786	0.72969	0.752641	0.607476	0.164577	16.4855	0.719764	0.362511	0.210903	1.37232	0.370299	0.325892	0.691484	0.435963	0.188102	0	0	0.327772	0.127326
NM_001025435.3	BC053393	cDNA sequence BC053393 (BC053393). mRNA	0.0728694	0.0563557	0.0717206	0.047174	0.0432033	0.0318283	3.48061	0.0409249	0.0381949	0.0583876	0.0484345	0.004966	0.0317918	0.0352198	0.0231328	0.0104724	0.0305449	0.0192372	0.0325513	0.005706
NM_001025438.2	Camk2d	calcium/calmodulin-dependent protein kinase II. delta (Camk2d). transcript variant 2. mRNA	0	0	0	0	0	0	0	0	0	0	0	0	0	0	0.008436	0	0	0	0	0
NM_001025439.2	Camk2d	calcium/calmodulin-dependent protein kinase II. delta (Camk2d). transcript variant 1. mRNA	0	0	0	0.004291	0	0	0	0	0	0	0	0	0	0	0	0	0	0	0	0
NM_001025444.3	Aptx	aprataxin (Aptx). transcript variant 2. mRNA	0.0425718	0.177357	0.135968	0.136652	0.0512076	0	0.645083	0.0338714	0.0122935	0	0.203898	0.120561	0	0.070329	0.0574373	0.007704	0.0584258	0	0.069847	0.0335803
NM_001025445.2	Aptx	aprataxin (Aptx). transcript variant 3. mRNA	0.0520791	0	0	0.0390786	0.0247432	0	0.414014	0.0414357	0.0650385	0	0	0	0	0.0333438	0	0	0	0.0424959	0	0
NM_001025559.3	Sox6	SRY (sex determining region Y)-box 6 (Sox6). transcript variant 2. mRNA	0	0	0	0	0	0	0	0	0	0	0	0	0	0	0	0	0	0	0	0
NM_001025560.2	Sox6	SRY (sex determining region Y)-box 6 (Sox6). transcript variant 3. mRNA	0	0	0	0	0	0	0	0	0	0	0	0	0	0	0	0	0	0	0	0
NM_001025561.3	Pus1	pseudouridine synthase 1 (Pus1). transcript variant 1. mRNA	0	0.0410902	0	0	0	0	0.468515	0.0727332	0.0678813	0	0	0	0	0	0	0	0	0	0.0830686	0
NM_001025562.2	Pus1	pseudouridine synthase 1 (Pus1). transcript variant 3. mRNA	0.15974	0	0	0.635709	0	0	0.748326	0	0	0	0	0	0.22567	0	0.184731	0	0	0	0	0
NM_001025565.2	Lhx9	LIM homeobox protein 9 (Lhx9). transcript variant 1. mRNA	0	0	0	0	0	0	0	0	0	0	0	0	0	0	0	0	0	0	0	0
NM_001025567.1	Dmbx1	diencephalon/mesencephalon homeobox 1 (Dmbx1). transcript variant 2. mRNA	0	0	0	0.005965	0	0	0.006771	0.002588	0	0.002685	0.002722	0.002512	0	0	0	0	0	0	0.005488	0
NM_001025568.2	Pde1c	phosphodiesterase 1C (Pde1c). transcript variant 2. mRNA	0	0	0	0	0	0	0	0	0	0	0	0	0	0	0	0	0	0	0	0
NM_001025570.1	Prrx1	paired related homeobox 1 (Prrx1). transcript variant 3. mRNA	0	0.006243	0	0	0	0	0.0133478	0	0	0	0	0.002476	0	0	0	0	0	0	0	0
NM_001025571.2	Sh2d2a	SH2 domain containing 2A (Sh2d2a). transcript variant 2. mRNA	0.338522	0.694494	0.592843	0.603117	0.725074	0.0274716	3.8361	0.287	0.271975	0.0572675	0.815192	0.940815	0.578528	0.625347	0.429276	0.194337	0.0685461	0.0809444	0.173256	0.0541708
NM_001025572.1	Ankrd12	ankyrin repeat domain 12 (Ankrd12). mRNA	0.151943	0.253265	0.251975	0.531942	0.164707	0.119332	2.95975	0.0174361	0.142117	0.0241223	0.408432	0.22455	0.158927	0.374993	0.177403	0.0666292	0	0.0458978	0.0949223	0
NM_001025573.2	Slc23a4	solute carrier family 23 member 4 (Slc23a4). mRNA	0	0	0.0103786	0.005547	0.018061	0	0	0	0	0	0.015186	0.009342	0	0.009465	0	0	0	0	0	0
NM_001025574.1	Bpifb9b	BPI fold containing family B. member 9B (Bpifb9b). mRNA	0	0	0	0	0	0	0	0	0	0	0	0	0	0	0	0	0	0	0	0
NM_001025575.2	Cfhr2	complement factor H-related 2 (Cfhr2). mRNA	0.005409	0	0	0.0148821	0.0121151	0	0.0337857	0	0	0	0	0.0125329	0	0	0	0	0	0	0.006846	0
NM_001025576.3	Ccdc141	coiled-coil domain containing 141 (Ccdc141). mRNA	0	0	0.003562	0	0.003099	0	0.0518557	0	0	0	0	0	0	0	0	0	0	0	0	0
NM_001025577.2	Maf	avian musculoaponeurotic fibrosarcoma oncogene homolog (Maf). mRNA	0.182742	0.681436	0.454932	0.522635	0.107712	0.223178	4.68592	0.100437	0.532962	0.0476405	0.250564	0.183854	0.157532	0.172166	0.139497	0.0293728	0.0925255	0.22122	0.155209	0.0736137
NM_001025581.1	Kcnc2	potassium voltage gated channel. Shaw-related subfamily. member 2 (Kcnc2). transcript variant 3. mRNA	0	0	0	0	0	0	0	0	0	0	0	0.003275	0	0	0	0	0	0	0	0
NM_001025582.2	Dram2	DNA-damage regulated autophagy modulator 2 (Dram2). transcript variant 1. mRNA	0.0996348	0.083171	0.325174	0.465043	0.139476	0.0748632	4.28969	0.101922	0.158537	0.149818	0.116156	0.0824492	0.136358	0.0167073	0.0240046	0.026081	0.0862134	0	0	0
NM_001025584.2	Kcnj6	potassium inwardly-rectifying channel. subfamily J. member 6 (Kcnj6). transcript variant Girk2-1. mRNA	0	0	0	0.0204534	0	0	0	0	0	0	0	0	0	0	0	0	0	0	0	0
NM_001025585.2	Kcnj6	potassium inwardly-rectifying channel. subfamily J. member 6 (Kcnj6). transcript variant Girk2B. mRNA	0	0	0	0	0	0	0	0	0	0	0	0	0	0	0	0	0	0	0	0
NM_001025586.2	Nr2c2ap	nuclear receptor 2C2-associated protein (Nr2c2ap). transcript variant 1. mRNA	0.648411	1.03236	0.487604	0.370833	0.293725	0.108195	2.7304	0.0695588	0	0	0.457348	0.40514	0.360236	0.410482	0.294885	0	0	0	0.0829896	0.0581859
NM_001025587.2	Nr2c2ap	nuclear receptor 2C2-associated protein (Nr2c2ap). transcript variant 2. mRNA	0	0.0533031	0	0.401569	0	0.126438	1.86889	0	0.203209	0	0.109946	0.262089	0	0.0513957	0	0	0.280815	0.122818	0.0738915	0.0194276
NM_001025589.1	Rfxank	regulatory factor X-associated ankyrin-containing protein (Rfxank). transcript variant 2. mRNA	0.357289	0.465891	0.30863	0.39915	0.284654	0	3.4449	0.349137	0.202986	0.127683	0.442555	0.447263	0.453516	0.354647	0.394698	0.087877	0.177709	0.215233	0.221553	0.10533
NM_001025590.2	Kcnj6	potassium inwardly-rectifying channel. subfamily J. member 6 (Kcnj6). transcript variant Girk2C. mRNA	0	0	0	0	0	0	0	0	0	0	0	0	0	0	0	0	0	0	0	0
NM_001025594.1	Zbtb43	zinc finger and BTB domain containing 43 (Zbtb43). transcript variant 2. mRNA	0.203248	0.345542	0.16688	0.168726	0	0.130103	3.06438	0.133829	0	0.0781093	0.277176	0.269975	0.346542	0	0.0803746	0	0	0	0.08427	0
NM_001025597.2	Ikzf1	IKAROS family zinc finger 1 (Ikzf1). transcript variant 1. mRNA	0.295601	0.344989	0.343242	0.114923	0.250081	0	0.230798	0.116955	0.0679972	0.0318303	0.157326	0.268012	0.274053	0.422405	0.158228	0.0549499	0	0.0324449	0.122	0.0342148
NM_001025599.3	Trim26	tripartite motif-containing 26 (Trim26). transcript variant 1. mRNA	0	0.356344	0	0	0	0	0	0	0.307926	0	0	0.345401	0.0536062	0	0	0	0.162237	0	0	0.353557
NM_001025600.1	Cadm1	cell adhesion molecule 1 (Cadm1). transcript variant 4. mRNA	0	0	0	0	0	0	0	0	0	0.005079	0	0	0	0	0	0	0	0	0	0.00546
NM_001025602.3	Il1rl1	interleukin 1 receptor-like 1 (Il1rl1). transcript variant 1. mRNA	0	0	0	0	0	0	0	0	0	0	0	0	0	0	0	0	0	0	0	0
NM_001025605.1	Gm527	predicted gene 527 (Gm527). mRNA	0.0352402	0.11154	0.0907136	0.0969583	0.0526205	0.0145373	0.752067	0.0420572	0.0392516	0.0290923	0.07374	0.0544353	0.130685	0.0965178	0.142637	0	0	0	0.0148675	0
NM_001025606.1	Tmem171	transmembrane protein 171 (Tmem171). transcript variant 2. mRNA	0	0	0	0	0	0	0	0	0	0	0	0	0	0	0	0	0	0	0	0.0197068
NM_001025607.4	Gm5168	predicted gene 5168 (Gm5168). mRNA	0	0	0	0	0	0	0	0	0	0	0	0	0	0	0	0	0	0	0	0
NM_001025608.2	Szrd1	SUZ RNA binding domain containing 1 (Szrd1). transcript variant 1. mRNA	0.390448	1.36968	0.642699	0.924449	0.469981	0.279403	3.11903	0.35503	0.449685	0.453896	0.64027	0.892375	0.416981	0.723313	0.215015	0.421803	0.246055	0.125164	0.383241	0.367693
NM_001025610.4	Ms4a7	membrane-spanning 4-domains. subfamily A. member 7 (Ms4a7). transcript variant 2. mRNA	0.0547752	0.0800171	0.017625	0.0376765	0.0230035	0	0.0641506	0	0.0305051	0	0	0.0475936	0	0.0321474	0	0	0	0	0.0173319	0
NM_001025612.2	Snx22	sorting nexin 22 (Snx22). transcript variant 1. mRNA	0	0	0	0	0.0307073	0.0593838	0.47099	0.290425	0.267233	0.14855	0.288313	0.0277955	0.0762629	0.116671	0.235839	0.113047	0	0.161513	0.225579	0.0638716
NM_001025613.1	Otud7b	OTU domain containing 7B (Otud7b). transcript variant 1. mRNA	0.233496	0	0.534271	0.466952	0.650097	0.921747	1.15799	0.198677	0.0264891	0	0.601238	0.005009	0.354111	0.408577	0.1721	0.0132052	0	0	0	0.119429
NM_001025614.1	Otud7b	OTU domain containing 7B (Otud7b). transcript variant 2. mRNA	2.55323	1.09907	4.2167	5.74719	1.94484	0.979597	5.36246	1.17077	1.04416	2.25162	8.04059	4.06168	1.30553	1.72533	1.61442	1.20236	0.147415	0.582708	0.653199	2.59856
NM_001025615.3	Ccdc50	coiled-coil domain containing 50 (Ccdc50). transcript variant 2. mRNA	0.228601	0.154129	0.320093	0.622052	0.184271	0	7.83377	0.0929396	0.165085	0	0.485707	0.117868	0.12887	0.193139	0	0.0629088	0	0	0.0651796	0.0133753
NM_001025617.2	Cant1	calcium activated nucleotidase 1 (Cant1). transcript variant 2. mRNA	0.35242	0.765747	0.430721	0.631483	0.470955	0.0733009	0.342216	0	0	0	1.05968	0.380838	0.472248	0.653527	0.487467	0	0	0	0.0712177	0.145855
NM_001025618.2	Cant1	calcium activated nucleotidase 1 (Cant1). transcript variant 3. mRNA	0	0.157989	0	0.14878	0	0	0.121971	0.365702	0.117115	0	0	0	0.311941	0	0	0	0	0	0	0
NM_001025779.2	Cdc6	cell division cycle 6 (Cdc6). transcript variant 2. mRNA	0	0	0	0	0.0127365	0	1.17804	0.004524	0.173123	0.0610278	0	0	0	0.0177994	0	0.0416788	0	0.0276472	0.009596	0.0100923
NM_001025947.2	Dnm1l	dynamin 1-like (Dnm1l). transcript variant 2. mRNA	0.0824921	0.0253698	0.0474987	0.149319	0.019449	0.0510445	0	0	0.0822103	0.0725812	0.0517844	0.0980837	0.0429354	0.0687994	0.023431	0.0185629	0.0309387	0	0.0274758	0.0202271
NM_001026211.2	Dnajc19	DnaJ heat shock protein family (Hsp40) member C19 (Dnajc19). transcript variant 2. mRNA; nuclear gene for mitochondrial product	0.129888	0.169771	0.14078	0.291537	0.137805	0.0253807	0.448353	0.0489518	0.0152287	0	0.308983	0.300956	0.228164	0.104316	0.11068	0.0167019	0.0389716	0.076701	0.0173048	0.0181992
NM_001026212.1	Ensa	endosulfine alpha (Ensa). transcript variant 2. mRNA	1.96613	4.93499	3.14464	3.9804	3.04211	0.828529	34.0427	1.40513	1.81281	0.705157	3.79209	3.64627	2.82994	3.25627	2.3464	0.545218	0.882859	0.764102	0.954485	0.614582
NM_001026214.2	Entpd5	ectonucleoside triphosphate diphosphohydrolase 5 (Entpd5). transcript variant 2. mRNA	0.321348	0.246261	0.273473	0.816505	0.200587	0	0.570354	0.280822	0.181898	0	0.522504	0.201402	0.746708	0.356586	0.137412	0.0300313	0	0	0	0
NM_001029836.2	Npnt	nephronectin (Npnt). transcript variant 2. mRNA	0	0	0	0	0	0	0	0	0	0	0	0	0	0	0	0	0	0	0	0
NM_001029837.2	Pik3cd	phosphatidylinositol-4.5-bisphosphate 3-kinase catalytic subunit delta (Pik3cd). transcript variant 2. mRNA	0.132009	0.291869	0.126281	0.235592	0.0998894	0.0397384	4.84704	0.108578	0.158957	0	0.199332	0.262469	0.0882061	0.154951	0.110714	0.0479418	0	0	0.0451567	0.0237453
NM_001029838.2	Pknox2	Pbx/knotted 1 homeobox 2 (Pknox2). transcript variant 2. mRNA	0	0	0	0.0271483	0	0	0	0	0	0	0	0	0	0	0	0	0	0	0	0
NM_001029841.4	Sla	src-like adaptor (Sla). transcript variant 1. mRNA	0	0	0	0	0	0	0	0	0	0	0	0	0.169968	0	0	0	0	0	0	0
NM_001029842.2	Slc16a6	solute carrier family 16 (monocarboxylic acid transporters). member 6 (Slc16a6). transcript variant 1. mRNA	0	0	0	0.008566	0	0	0	0	0	0	0	0	0.0872371	0	0	0	0.005916	0	0	0
NM_001029843.2	Vrk1	vaccinia related kinase 1 (Vrk1). transcript variant 2. mRNA	0	0.0342052	0.0602736	0.022548	0.0734224	0	0.438763	0.0195611	0.0521605	0	0.0470359	0.0705293	0.104199	0	0.0947733	0.0200222	0.0367078	0	0.0118542	0
NM_001029844.2	Vrk1	vaccinia related kinase 1 (Vrk1). transcript variant 3. mRNA	0.0737698	0.30939	0.21746	0.383018	0.223859	0.0117799	1.12222	0.12212	0.166984	0.0235743	0.227063	0.278446	0.0970729	0.170388	0.0931079	0.0261625	0.108527	0.0213596	0.0662614	0.069686
NM_001029850.4	Magi1	membrane associated guanylate kinase. WW and PDZ domain containing 1 (Magi1). transcript variant 3. mRNA	0	0	0	0	0	0	0	0	0	0	0	0	0	0	0	0	0	0	0	0
NM_001029855.1	Psme2	proteasome (prosome. macropain) activator subunit 2 (PA28 beta) (Psme2). transcript variant 2. mRNA	0.34768	0.888826	0.880997	0.792177	0.742228	0.188245	21.3435	0.778005	0.629291	0.255632	0	1.05733	1.10131	0.471871	0.351814	0.424717	1.0065	0.231616	0.687576	0.231396
NM_001029856.2	Atad5	ATPase family. AAA domain containing 5 (Atad5). mRNA	0	0	0.0294489	0.0198797	0.0472016	0	0.658164	0.0172462	0.042922	0	0	0	0.002977	0	0	0	0	0	0.006097	0
NM_001029867.1	Ugt2b36	UDP glucuronosyltransferase 2 family. polypeptide B36 (Ugt2b36). mRNA	0	0.0135516	0	0	0	0	0	0	0	0	0	0	0	0	0	0	0	0	0.0117412	0
NM_001029868.2	Pdzd4	PDZ domain containing 4 (Pdzd4). transcript variant 1. mRNA	0	0.032054	0.0903727	0.0724454	0.0294878	0	0.363199	0	0	0	0.0550972	0.005084	0	0	0	0	0	0	0	0
NM_001029872.3	Itgad	integrin. alpha D (Itgad). mRNA	0	0	0	0	0	0	0	0	0	0	0	0.0153138	0	0	0	0	0	0	0	0
NM_001029873.2	Unc13a	unc-13 homolog A (Unc13a). mRNA	0.001097	0	0.014119	0	0.007371	0	0.0411117	0.007855	0.004887	0.009509	0	0	0	0	0	0.0067	0.003127	0	0.0138842	0.00146
NM_001029876.2	Urb2	URB2 ribosome biogenesis 2 homolog (S. cerevisiae) (Urb2). transcript variant 1. mRNA	0.0890367	0.151046	0.15526	0.254849	0.062722	0.0426535	1.30962	0	0.0719794	0.156492	0.0396658	0.163045	0.18817	0	0	0	0	0.058005	0.187213	0
NM_001029877.3	Nova2	NOVA alternative splicing regulator 2 (Nova2). mRNA	0	0	0.0161555	0	0	0	0.0522686	0.004993	0	0	0.001313	0	0.0129301	0.002456	0.005645	0	0	0.001174	0	0
NM_001029878.2	Lonrf2	LON peptidase N-terminal domain and ring finger 2 (Lonrf2). mRNA	0	0.007433	0.0523936	0.0227501	0.0128217	0.0141688	0.520452	0.007591	0.004251	0.001575	0.004791	0.0176851	0.00629	0.002986	0.005149	0	0.007252	0.002855	0.00322	0.008466
NM_001029889.2	Usf3	upstream transcription factor family member 3 (Usf3). mRNA	0.302498	0.0800686	0	0	0	0	5.13969	0	0.0649134	0	0.181182	0	0.144941	0	0	0.0533946	0	0.009341	0.0360032	0
NM_001029890.3	Mex3a	mex3 RNA binding family member A (Mex3a). mRNA	0.012661	0.0205506	0.0217275	0.0193527	0.0126036	0.0104458	1.52894	0.0335782	0.0313382	0.0156783	0.0211945	0.0325956	0	0	0.0341641	0.0137479	0.002005	0.0189405	0.0498545	0.0337057
NM_001029893.1	Psg26	pregnancy-specific glycoprotein 26 (Psg26). mRNA	0	0	0	0	0	0	0	0	0	0	0	0	0	0	0	0	0	0	0	0
NM_001029895.3	Ate1	arginyltransferase 1 (Ate1). transcript variant 3. mRNA	0.0104668	0	0	0	0	0.0237476	0.414057	0	0	0	0.0350427	0	0.157417	0	0	0.0660606	0	0.101777	0.0176633	0
NM_001029912.2	Zswim5	zinc finger SWIM-type containing 5 (Zswim5). mRNA	0	0	0	0	0	0	0	0	0	0	0	0	0.004012	0	0	0.003964	0	0	0	0
NM_001029929.3	Zmynd15	zinc finger. MYND-type containing 15 (Zmynd15). transcript variant 1. mRNA	0	0	0	0	0	0	0	0	0	0	0	0	0	0	0	0	0	0	0	0
NM_001029930.2	Gm5796	predicted gene 5796 (Gm5796). mRNA	0	0	0	0	0	0	0.135618	0	0	0	0	0.0111795	0	0.005663	0	0	0	0	0.0244269	0
NM_001029933.3	Zfp114	zinc finger protein 114 (Zfp114). mRNA	0	0	0	0	0	0	0	0	0	0	0	0	0	0	0	0	0	0	0	0
NM_001029934.1	Usp32	ubiquitin specific peptidase 32 (Usp32). mRNA	1.81343	2.05696	2.00613	1.85247	2.15735	0.641431	19.5421	1.86768	2.94941	1.34736	2.27834	1.76214	1.65215	2.07262	1.40873	0.766521	0.470395	1.03914	1.61379	0.943818
NM_001029935.2	Trim38	tripartite motif-containing 38 (Trim38). mRNA	0	0	0	0	0	0	0.0184794	0	0	0.0146543	0	0	0	0.0138907	0	0	0	0	0	0
NM_001029936.3	Specc1	sperm antigen with calponin homology and coiled-coil domains 1 (Specc1). transcript variant 2. mRNA	0	0	0	0	0	0	0	0	0	0	0	0	0	0	0	0	0	0	0	0
NM_001029937.2	Sec14l3	SEC14-like lipid binding 3 (Sec14l3). mRNA	0	0	0	0	0	0	0	0	0	0	0	0	0	0	0	0	0	0	0	0
NM_001029938.2	Rilp	Rab interacting lysosomal protein (Rilp). mRNA	0.0115989	0.0677761	0	0.0638255	0.0779375	0	0.670154	0.0138427	0.0645961	0.0718157	0.0728122	0.188126	0.0716894	0.054459	0.0234737	0	0.0661227	0.0260276	0	0.0308783
NM_001029977.3	Gm4788	predicted gene 4788 (Gm4788). transcript variant 1. mRNA	0	0	0	0	0	0	0	0	0	0	0	0	0	0	0	0	0	0	0	0
NM_001029978.3	Tceal3	transcription elongation factor A (SII)-like 3 (Tceal3). transcript variant 1. mRNA	0	0	0	0	0	0	0	0	0	0	0	0	0	0	0	0	0	0	0	0
NM_001029979.3	Safb2	scaffold attachment factor B2 (Safb2). transcript variant 1. mRNA	0.374467	0.562662	0.977706	1.80669	0.368442	0.145648	0	0.165993	0	0	1.4608	2.18153	0.720791	0.744092	1.14758	0.0522789	0	0.246085	0.484109	0.256345
NM_001029982.2	Sec23ip	Sec23 interacting protein (Sec23ip). mRNA	0.27163	0.388421	0.164956	0.410516	0.18209	0.0899578	5.86659	0.0228292	0.0213063	0.0402689	0.451506	0.294743	0.331043	0.213307	0.100653	0.0397244	0.117228	0.0450707	0	0.0636554
NM_001029983.2	Man1b1	mannosidase. alpha. class 1B. member 1 (Man1b1). mRNA	1.04675	1.64858	1.19388	2.15677	1.01525	0.106988	10.0189	0.65808	0.434611	0.237252	1.68968	1.69721	1.29104	1.46727	0.788092	0.171252	0.219777	0.262151	0.411056	0
NM_001029984.2	Fcrlb	Fc receptor-like B (Fcrlb). mRNA	0	0.0597792	0	0	0	0	0.127802	0	0	0	0	0	0.0168615	0	0	0.0249943	0.0583208	0	0	0.0181567
NM_001029985.4	Kcp	kielin/chordin-like protein (Kcp). mRNA	0	0	0	0	0	0	0.0223034	0	0	0	0	0	0	0	0	0	0	0	0	0
NM_001029987.2	Doxl2	diamine oxidase-like protein 2 (Doxl2). transcript variant 1. mRNA	0	0	0	0	0	0	0	0	0	0	0	0	0	0	0	0	0	0	0	0
NM_001029988.2	Fat2	FAT atypical cadherin 2 (Fat2). mRNA	0	0	0	0	0	0	0	0	0	0	0	0	0	0	0	0	0	0	0	0
NM_001029990.1	Mettl17	methyltransferase like 17 (Mettl17). mRNA; nuclear gene for mitochondrial product	0.989664	1.88335	1.0741	1.56016	0.808775	0.291296	61.2984	0.676743	0.321757	0.264977	1.12834	1.79109	1.28949	1.78959	0.721752	0.143767	0.221099	0.216075	0.135415	0.0996897
NM_001029993.1	Zc3h18	zinc finger CCCH-type containing 18 (Zc3h18). transcript variant 1. mRNA	0.332929	0.597039	0.659011	0.565397	0.516842	0.18754	14.9655	0.150712	0.457779	0.278639	0.328628	0.553287	0.581842	0.25334	0.0526629	0.30853	0.251969	0.0824365	0.366164	0
NM_001029994.1	Zc3h18	zinc finger CCCH-type containing 18 (Zc3h18). transcript variant 2. mRNA	0.561658	1.23757	0.707836	1.24914	0.403608	0.118744	16.993	0.513902	0.148578	0.0811429	1.05187	1.11702	0.598823	1.09879	0.669373	0	0.260153	0.231062	0.266578	0
NM_001030014.2	Mcat	malonyl CoA:ACP acyltransferase (mitochondrial) (Mcat). mRNA; nuclear gene for mitochondrial product	0.282191	0.452781	0.244119	0.680949	0.196868	0.091601	1.22806	0.176671	0.206107	0	0.557573	0.225095	0.394576	0.445267	0.162278	0.113022	0.17142	0.0830462	0	0
NM_001030274.1	Ndufs5	NADH:ubiquinone oxidoreductase core subunit S5 (Ndufs5). mRNA	1.75144	4.00365	2.40034	3.30179	1.39843	0.602086	3.64661	1.35479	1.69792	0.642617	3.72596	3.15634	2.96688	2.22715	1.6191	0.832032	0.924493	0.836979	1.39573	0.733932
NM_001030290.2	Rdh8	retinol dehydrogenase 8 (Rdh8). mRNA	0.0495936	0.129643	0.117583	0.179539	0.0847711	0.0323027	6.9454	0.0872232	0.0290731	0.0646448	0.0884815	0.163294	0.0677577	0.0704681	0.0563461	0.0191313	0.00372	0.0117143	0.0198219	0.0173719
NM_001030292.1	Kcnk15	potassium channel. subfamily K. member 15 (Kcnk15). mRNA	0	0	0	0	0	0	0	0	0	0	0	0	0	0	0	0	0	0	0	0
NM_001030293.3	Spry3	sprouty RTK signaling antagonist 3 (Spry3). mRNA	0	0	0	0.0106095	0.004318	0.004772	0.012043	0	0	0	0	0	0	0	0	0	0	0	0	0
NM_001030296.4	Prr7	proline rich 7 (synaptic) (Prr7). mRNA	0.173856	0.225754	0.0745886	0.256886	0.274023	0.0637503	30.3862	0.568668	0.566593	0.23921	0.145517	0.216335	0.230829	0.332561	0.0955631	0.149451	0.266132	0.122818	0.342291	0.017142
NM_001030297.2	Tmprss11c	transmembrane protease. serine 11c (Tmprss11c). mRNA	0	0	0	0	0	0	0	0	0	0	0	0	0	0	0	0	0	0	0	0
NM_001030305.2	Pmp2	peripheral myelin protein 2 (Pmp2). mRNA	0	0	0.0165266	0.0176643	0	0	0	0	0	0	0	0	0	0	0	0	0	0	0	0
NM_001030307.2	Dkc1	dyskeratosis congenita 1. dyskerin (Dkc1). transcript variant 3. mRNA	1.37778	1.54261	1.20231	1.60312	1.34354	1.13672	5.69823	0	1.68077	0.533891	1.9573	1.07498	1.48686	1.20284	0.501603	0.652616	1.44264	0.634462	1.08346	0.68617
NM_001031621.3	Abca17	ATP-binding cassette. sub-family A (ABC1). member 17 (Abca17). mRNA	0	0	0	0	0	0	0	0	0	0	0	0	0	0	0	0	0	0	0	0
NM_001031622.2	Gm16367	predicted gene 16367 (Gm16367). mRNA	0	0	0	0	0	0	0	0	0	0	0	0	0	0	0	0	0	0	0	0
NM_001031664.1	Nudt10	nudix (nucleoside diphosphate linked moiety X)-type motif 10 (Nudt10). mRNA	0	0	0.0254428	0.0339929	0	0	0	0	0	0	0	0	0.0122179	0	0	0	0	0	0	0
NM_001031667.1	Gsk3a	glycogen synthase kinase 3 alpha (Gsk3a). mRNA	1.59676	3.22067	0.70321	2.49304	1.46073	0.59997	4.56627	0.583173	0.694266	0.295404	1.91778	1.40858	1.69796	1.97815	1.36008	0.634521	0.455138	0.159728	0.764562	0.455815
NM_001031772.2	Lin28b	lin-28 homolog B (C. elegans) (Lin28b). mRNA	0	0	0	0	0	0	0	0	0	0	0	0	0	0	0	0	0	0	0	0
NM_001031808.2	Mrpl41	mitochondrial ribosomal protein L41 (Mrpl41). mRNA; nuclear gene for mitochondrial product	0.401175	0.54909	0.311667	0.621496	0.206423	0.08051	2.62998	0.15528	0.169075	0.143216	0.390235	0.468957	0.576326	0.449686	0.390097	0.0706401	0.164829	0.166257	0.109785	0.105838
NM_001031811.2	Kcnh8	potassium voltage-gated channel. subfamily H (eag-related). member 8 (Kcnh8). mRNA	0	0	0.005236	0	0	0	0	0	0	0	0	0	0	0	0	0	0	0	0	0
NM_001031814.1	Smg1	SMG1 homolog. phosphatidylinositol 3-kinase-related kinase (C. elegans) (Smg1). mRNA	0.91609	1.67713	1.55592	2.8156	1.048	0.485679	34.1724	0.120955	0.632791	0.299813	2.1469	1.20547	0.993907	1.08455	0.527967	0.190524	0.200615	0.279859	0.52878	0.194863
NM_001031851.1	Agxt2	alanine-glyoxylate aminotransferase 2 (Agxt2). transcript variant 3. mRNA; nuclear gene for mitochondrial product	0	0	0	0	0	0	0	0	0	0	0	0	0	0	0	0	0	0	0	0
NM_001032298.3	Bglap2	bone gamma-carboxyglutamate protein 2 (Bglap2). mRNA	0	0	0.0476582	0	0	0	0	0	0.0412432	0	0	0	0	0	0.024979	0.0678492	0	0	0	0.0492878
NM_001032378.2	Pecam1	platelet/endothelial cell adhesion molecule 1 (Pecam1). transcript variant 2. mRNA	5.31138	5.12024	6.98514	10.825	5.18545	2.27878	19.1859	3.90354	2.81856	4.54035	15.6825	7.92169	3.16467	5.98169	3.67564	1.44366	1.25842	2.664	2.33055	4.19966
NM_001032413.1	Pear1	platelet endothelial aggregation receptor 1 (Pear1). transcript variant 3. mRNA	0.134356	0	0.338109	0.110346	0.0628807	0	7.84726	0.0382916	0.207722	0	0	0.185855	0.0594922	0.346012	0.156921	0	0	0.0674976	0.111675	0
NM_001032414.1	Pear1	platelet endothelial aggregation receptor 1 (Pear1). transcript variant 4. mRNA	0	0.1042	0	0.187841	0.0502111	0.224469	0	0	0	0.317981	0	0.0802753	0	0.0693729	0.151229	0	0.243978	0	0	0.0217018
NM_001032727.1	Sybu	syntabulin (syntaxin-interacting) (Sybu). transcript variant b. mRNA	0	0	0	0	0	0	0	0	0	0	0	0	0	0	0	0	0	0	0	0
NM_001033039.2	Klhdc9	kelch domain containing 9 (Klhdc9). mRNA	0	0.0164537	0.0579867	0.0154946	0	0	0.369351	0	0	0	0.014141	0	0.013923	0	0	0	0	0	0	0
NM_001033040.3	Ccdc189	coiled-coil domain containing 189 (Ccdc189). transcript variant 1. mRNA	0.164647	0.245532	0.145691	0.221783	0.211278	0.0594303	5.39921	0.245622	0.129901	0.310076	0.146423	0.449051	0.351932	0.430814	0.22214	0.0293313	0.317761	0.130851	0.303901	0.205462
NM_001033041.2	Acmsd	amino carboxymuconate semialdehyde decarboxylase (Acmsd). mRNA	2.67697	2.17193	2.57431	2.41674	1.45638	1.03999	2.90953	3.01782	2.44803	1.85523	3.70466	3.06167	4.14108	4.14647	1.98542	1.217	0.818315	1.82173	2.35343	1.82719
NM_001033042.3	Lrrc14b	leucine rich repeat containing 14B (Lrrc14b). mRNA	0.003189	0.0512455	0.0533595	0.0307099	0	0.003947	2.10151	0.0228358	0.0248646	0.007898	0.032031	0.0665028	0.0197107	0.0636364	0	0.0389569	0	0	0.0443995	0
NM_001033043.1	Rnf17	ring finger protein 17 (Rnf17). mRNA	0	0	0	0	0	0	0	0	0	0	0	0	0	0	0	0	0	0	0	0
NM_001033122.4	Cd69	CD69 antigen (Cd69). mRNA	1.34767	2.07068	1.71383	2.03862	0.691491	5.05664	125.312	8.0034	10.3042	4.03581	1.8066	2.29531	1.90485	1.78987	0.775115	6.07354	8.93006	4.21691	5.71515	3.40192
NM_001033123.3	Gm14288	predicted gene 14288 (Gm14288). mRNA	0	0.0298896	0	0	0	0.0759641	0	0	0.182318	0	0.128442	0.260746	0.177046	0	0	0	0	0	0.362552	0
NM_001033124.1	Ntrk1	neurotrophic tyrosine kinase. receptor. type 1 (Ntrk1). mRNA	0	0	0	0	0	0	0	0	0	0	0	0	0	0	0	0	0	0	0	0
NM_001033126.2	Cd27	CD27 antigen (Cd27). transcript variant 1. mRNA	1.62252	2.02931	1.89521	2.33909	0.927198	0	8.79836	0.391257	0.0742691	0.17202	2.58123	3.97189	2.12243	1.42186	1.64182	0	0.110869	0.0374064	0.112525	0
NM_001033128.3	Bbs1	Bardet-Biedl syndrome 1 (human) (Bbs1). mRNA	0.037225	0.0747716	0.0499077	0.0554771	0.0486362	0.0307121	1.3854	0.0166597	0.0345519	0.0134448	0.075946	0.0161722	0.0498499	0.0364121	0.0251117	0.007579	0.006632	0.0226231	0.005889	0.004129
NM_001033131.4	Krtdap	keratinocyte differentiation associated protein (Krtdap). transcript variant 1. mRNA	0	0	0	0	0	0	0	0	0	0	0	0	0	0	0	0	0	0	0	0
NM_001033132.3	Commd6	COMM domain containing 6 (Commd6). transcript variant 1. mRNA	1.16246	1.72645	1.25928	2.01229	0.759402	0.143861	4.29606	0.369954	0.280536	0.179936	1.55676	1.44774	1.19747	1.56916	0.771116	0.355008	0.331345	0.173901	0.232954	0.257889
NM_001033135.3	Rnf149	ring finger protein 149 (Rnf149). mRNA	0.976211	0.796925	0.766809	1.27383	2.40757	0.506344	11.4106	0.933755	1.75892	0.213328	1.63117	0.760903	0.354921	1.21749	1.09919	0.460346	0.143221	0.430868	0.440623	0.320078
NM_001033136.3	Rmdn3	regulator of microtubule dynamics 3 (Rmdn3). mRNA	0.318867	0.545339	0.380377	0.572396	0.104517	0.163622	3.55836	0.180993	0.870585	0.274475	0.273401	0.42798	0.278799	0.397107	0.251831	0.161508	0.437821	0.165793	0.423268	0.341622
NM_001033139.3	Spindoc	spindlin interactor and repressor of chromatin binding (Spindoc). transcript variant 1. mRNA	0.0715321	0.22105	0.0779031	0.083266	0.092433	0	2.68082	0.0197007	0.0306441	0.0272552	0.0829002	0.172118	0.14964	0.180846	0.0445432	0.063856	0.0470524	0	0.0278573	0
NM_001033140.3	Sdhaf1	succinate dehydrogenase complex assembly factor 1 (Sdhaf1). mRNA; nuclear gene for mitochondrial product	0.479117	0.816558	0.479624	0.720139	0.397452	0.175685	5.15402	0.487087	0.553419	0.043948	0.534694	0.493392	0.592255	0.729017	0.239414	0.195092	0.404641	0.139367	0.471648	0.354303
NM_001033141.2	Ecscr	endothelial cell surface expressed chemotaxis and apoptosis regulator (Ecscr). transcript variant 3. mRNA	0	0	0	0.0216285	0	0	0	0	0	0	0	0	0	0	0	0	0	0	0	0
NM_001033142.3	Rnf166	ring finger protein 166 (Rnf166). transcript variant 1. mRNA	0.595196	1.87437	1.13026	2.15438	0.92881	0.0966021	3.30632	0.26783	0.21736	0.809537	1.62316	1.18692	1.04331	1.45454	0.500248	0.441014	0	0.0875802	0.506331	0.26625
NM_001033145.2	Dipk2a	divergent protein kinase domain 2A (Dipk2a). mRNA	0.133021	0.408072	0.282492	0.384286	0.268145	0.0493863	1.97332	0.0926056	0.11853	0.0329443	0.217109	0.220887	0.224724	0.205583	0.125629	0.0270824	0.0442352	0.0596986	0.0505081	0.0147552
NM_001033148.3	1700029J07Rik	RIKEN cDNA 1700029J07 gene (1700029J07Rik). transcript variant 1. mRNA	0.0383526	0.0747021	0.0452492	0.0527609	0.003579	0.007911	1.54715	0	0	0	0.008025	0.0666485	0.0592615	0.0600242	0.0172483	0	0.0318849	0	0	0
NM_001033149.3	Ttc9	tetratricopeptide repeat domain 9 (Ttc9). mRNA	0	0	1.92125	4.37093	0	0.002261	1.45507	0.004361	0.00407	0	0	3.49468	1.33479	0.004289	0	1.85918	0.557242	1.23202	1.17705	1.40326
NM_001033150.2	Plekhm2	pleckstrin homology domain containing. family M (with RUN domain) member 2 (Plekhm2). transcript variant 1. mRNA	0.283983	0.255056	0.406119	0.590344	0.259137	0.140578	8.31064	0.384106	0	0	0.295796	0.207148	0.153418	0.155558	0.224211	0	0.143904	0.146331	0.10916	0.0868013
NM_001033155.1	Dnajb14	DnaJ heat shock protein family (Hsp40) member B14 (Dnajb14). mRNA	0.0662348	0.179693	0.0730708	0.221286	0	0	0.147756	0	0.0790439	0	0.130676	0.0876964	0.023393	0.0888527	0.153194	0	0.0269706	0	0.0479037	0
NM_001033156.4	Fbxo33	F-box protein 33 (Fbxo33). mRNA	0.381189	1.05802	0.582202	0.877485	0.384203	0.106929	14.2065	0.533782	0.430241	0.176226	0.877402	0.786075	0.713087	0.808372	0.37715	0.170739	0.083301	0.13686	0.215499	0.11501
NM_001033157.4	5730507C01Rik	RIKEN cDNA 5730507C01 gene (5730507C01Rik). transcript variant 2. mRNA	0.0248179	0	0.004563	0.0146321	0	0	0	0.0126938	0	0	0	0.0123223	0.0438263	0.0249696	0.0143503	0	0	0	0.008975	0
NM_001033158.2	Rasl12	RAS-like. family 12 (Rasl12). transcript variant 1. mRNA	0.007208	0.0894965	0.02783	0.0594917	0.0928248	0	0	0.0172036	0	0.008925	0.0723927	0.0167002	0.0400929	0.042301	0.0194487	0	0	0.008087	0.0182448	0
NM_001033159.2	Zfp597	zinc finger protein 597 (Zfp597). mRNA	0.223985	0.284031	0.408405	0.507132	0.418066	0.0481241	5.25617	0.0779663	0.180181	0.0500796	0.302694	0.180202	0.13267	0.390717	0.243437	0.0684036	0	0	0	0
NM_001033161.2	Tradd	TNFRSF1A-associated via death domain (Tradd). mRNA	0.663902	1.62565	1.01725	0.869825	0.474425	0.195624	11.4335	0.15092	0.281704	0.0626378	0.690638	1.06948	0.789411	0.786707	0.622744	0.0772387	0.252317	0.283766	0.12004	0.143077
NM_001033162.2	Shcbp1l	Shc SH2-domain binding protein 1-like (Shcbp1l). mRNA	0.0342579	0	0	0	0	0	1.29726	0.0204425	0	0	0	0	0	0.005026	0.0231102	0	0	0	0	0
NM_001033163.4	Ephx3	epoxide hydrolase 3 (Ephx3). transcript variant 1. mRNA	0	0	0	0	0	0	0	0	0	0	0	0	0	0	0	0	0	0	0	0
NM_001033164.2	2510002D24Rik	RIKEN cDNA 2510002D24 gene (2510002D24Rik). mRNA	0.369621	1.24605	0.384244	0.743163	0.437819	0.0703737	14.9401	0.237527	0.19793	0.105625	0.63362	0.543502	0.685355	1.00122	0.489098	0.0347323	0.25326	0.103677	0.0629757	0.056769
NM_001033165.3	Dnajc25	DnaJ heat shock protein family (Hsp40) member C25 (Dnajc25). mRNA	0.0431388	0.0630184	0.0370153	0	0.150301	0.0593188	0	0.0572042	0.0320329	0.011871	0.0120357	0.0777423	0.0355504	0	0.0388016	0.0117105	0.0273249	0.0322673	0	0.0510414
NM_001033166.3	Selenoh	selenoprotein H (Selenoh). transcript variant 1. mRNA	1.13566	1.62213	1.33175	2.01363	0.734829	0	14.6994	0.346366	1.026	0.437517	1.44166	1.90043	1.15426	0.992367	0.783132	0.123315	0.39564	0.226522	0	0
NM_001033167.3	Slc22a23	solute carrier family 22. member 23 (Slc22a23). transcript variant 1. mRNA	0	0	0	0	0	0	0	0	0	0	0	0	0	0	0.086945	0	0	0	0	0
NM_001033168.2	1700066B19Rik	RIKEN cDNA 1700066B19 gene (1700066B19Rik). mRNA	0	0	0	0.0192445	0.007833	0.0259686	0.251214	0.020869	0.007791	0.008661	0.008782	0	0.0172925	0.00821	0.009437	0.008544	0.0398743	0.003924	0.0265584	0.00931
NM_001033170.4	Fam83e	family with sequence similarity 83. member E (Fam83e). mRNA	0	0	0	0	0	0	0	0	0	0	0	0	0	0	0	0	0	0	0	0
NM_001033171.2	Klrg2	killer cell lectin-like receptor subfamily G. member 2 (Klrg2). mRNA	0	0.0112119	0.009878	0.005279	0	0	0.419472	0.0274791	0	0	0	0.0133375	0.009487	0	0.031065	0	0.0109384	0	0	0
NM_001033172.3	Rab11fip2	RAB11 family interacting protein 2 (class I) (Rab11fip2). transcript variant 1. mRNA	0.0165105	0.0434143	0.174253	0.0590543	0.0332821	0	0.665176	0.0689653	0.007356	0	0.103645	0.0612089	0	0.062016	0.0178206	0.0161351	0.0141184	0.0111147	0.0710495	0
NM_001033173.2	Usp31	ubiquitin specific peptidase 31 (Usp31). mRNA	0.130679	0.331303	0.172534	0.307353	0.0963058	0.150246	2.36185	0.0372287	0.147432	0.149294	0.298497	0.174836	0.159453	0.123702	0.084174	0.0514949	0.0793033	0.0482426	0.12058	0.0852892
NM_001033174.1	Osbp	oxysterol binding protein (Osbp). mRNA	0.927231	1.71127	1.42424	1.90024	1.10891	0.264446	13.3709	0.487267	0.663018	0.250432	1.67674	1.35935	1.25703	1.41534	0.872616	0.200434	0.274629	0.222623	0.400849	0.147294
NM_001033175.3	Cln6	ceroid-lipofuscinosis. neuronal 6 (Cln6). mRNA	0.400656	0.842099	0.457792	0.742397	0.279288	0.0303573	2.51534	0.146375	0.255007	0.0607517	0.554352	0.866762	0.363869	0.599857	0.286827	0.0898955	0.128186	0.0642183	0.134536	0.0707448
NM_001033176.1	Slc6a21	solute carrier family 6 member 21 (Slc6a21). mRNA	0	0	0	0	0	0	0	0	0	0	0	0	0	0.0118697	0	0	0	0	0	0
NM_001033177.2	Krt76	keratin 76 (Krt76). mRNA	0	0	0	0	0	0.004688	0.0118294	0	0	0	0	0	0	0	0	0	0	0	0	0
NM_001033178.3	Tmem181a	transmembrane protein 181A (Tmem181a). transcript variant 1. mRNA	0.0968628	0.153051	0.0508856	0.255626	0.132828	0.0342496	6.58118	0.0613389	0.0374308	0.0489579	0.141466	0.0343523	0.122179	0.0556884	0.04534	0.009659	0	0.0598839	0.0600472	0.0421005
NM_001033181.1	Jrkl	Jrk-like (Jrkl). mRNA	0.266987	0.715041	0.698721	0.754982	0.578063	0.0991239	5.41062	0.113292	0.109039	0.0330615	0.502804	0.350552	0.293363	0.389995	0.18411	0.0144953	0.0422787	0.0465974	0.0976208	0.0236922
NM_001033184.3	1700057G04Rik	RIKEN cDNA 1700057G04 gene (1700057G04Rik). mRNA	0	0	0	0	0	0	0	0	0	0	0	0	0	0	0	0	0	0	0	0
NM_001033185.2	Ccdc190	coiled-coil domain containing 190 (Ccdc190). transcript variant 1. mRNA	0	0	0	0	0	0	0	0	0	0	0	0	0	0	0	0	0	0	0	0
NM_001033186.3	Skap1	src family associated phosphoprotein 1 (Skap1). transcript variant 1. mRNA	0.52783	0.560778	0.257333	0.819641	0.60455	0.267227	7.9551	0.462907	0.953132	0.20797	0.617507	1.16278	1.06768	0.929347	0.372256	0.468934	0.376129	0.188432	0.450434	0.0532263
NM_001033189.3	C77080	expressed sequence C77080 (C77080). transcript variant 1. mRNA	0	0	0	0	0	0	0	0	0	0	0	0	0	0	0	0	0	0	0	0
NM_001033191.2	Naa11	N(alpha)-acetyltransferase 11. NatA catalytic subunit (Naa11). mRNA	0	0	0	0	0	0	0	0	0	0.006447	0	0	0	0	0	0	0	0	0	0
NM_001033192.3	Fam8a1	family with sequence similarity 8. member A1 (Fam8a1). transcript variant 1. mRNA	0.449993	0.805354	0.733824	1.03714	0.474922	0.163278	8.09376	0.196821	0.267665	0.195469	0.828221	0.674175	0.646535	0.508841	0.457727	0.1439	0.120878	0.195609	0.158041	0.194433
NM_001033194.3	Gtf3c3	general transcription factor IIIC. polypeptide 3 (Gtf3c3). mRNA	0.176467	0.413535	0.317031	0.348971	0.133809	0.0955451	9.0304	0.133821	0.16789	0.091051	0.36695	0.247033	0.29994	0.241659	0.168645	0.080838	0.0314374	0.0474358	0.114001	0.009787
NM_001033196.2	Znfx1	zinc finger. NFX1-type containing 1 (Znfx1). transcript variant 1. mRNA	0.306314	0.68801	0.289843	0.634582	0.218298	0.789629	4.79458	0.199401	1.07479	0.563723	1.06557	0.537215	0	0.170537	0.191119	0.282488	0	0.192895	0.625212	0.414176
NM_001033197.2	AU015228	expressed sequence AU015228 (AU015228). mRNA	0	0	0.00378	0	0	0	0	0	0	0	0	0	0	0	0	0	0	0	0	0
NM_001033199.3	Clca4b	chloride channel accessory 4B (Clca4b). mRNA	0	0	0	0	0	0	0	0	0	0	0	0	0	0	0	0	0	0	0	0
NM_001033201.3	Ncbp1	nuclear cap binding protein subunit 1 (Ncbp1). mRNA	0.583444	1.17546	1.07124	1.20585	0.637913	0.424331	6.41639	0.363004	0.609818	0.362956	1.07968	0.704762	1.21342	0.931517	0.440221	0.152002	0.433493	0.474672	0.356975	0.305493
NM_001033202.3	Usp30	ubiquitin specific peptidase 30 (Usp30). mRNA	0.163216	0.238431	0.234311	0.302256	0.203876	0	6.36196	0.0524433	0.0384567	0.0544152	0.177333	0.483633	0.294877	0.198951	0.169392	0.061348	0.0805204	0.0140866	0.0556172	0.0167119
NM_001033204.1	Rpusd3	RNA pseudouridylate synthase domain containing 3 (Rpusd3). transcript variant 1. mRNA; nuclear gene for mitochondrial product	0.193224	0.453643	0.248694	0.0569601	0.170021	0.0170804	7.09062	0.074122	0.0922365	0.0341818	0.233929	0.127916	0.20473	0.283507	0.0372422	0.0252897	0.0393401	0.0541984	0.0349369	0
NM_001033205.3	Zfp575	zinc finger protein 575 (Zfp575). mRNA	0.0511182	0.0420046	0.0123362	0.0615319	0.0536691	0.0118616	0.898015	0.003813	0.558694	0.0197814	0.160447	0.107339	0.0355439	0.986288	0.116383	0.003903	0.0591932	0.0286768	0.0444804	0.008505
NM_001033206.2	Pwwp2b	PWWP domain containing 2B (Pwwp2b). transcript variant 2. mRNA	0	0.0547869	0.13033	0.0206374	0.0924013	0.0464135	0.515366	0.0626625	0.0334185	0	0.0470863	0	0.0834483	0	0.02024	0.009163	0	0.008416	0.0189871	0
NM_001033207.3	Nlrc5	NLR family. CARD domain containing 5 (Nlrc5). mRNA	0.143746	0.276301	0.0519334	0.0659163	0	0	3.03621	0.0692232	0	0.57617	0	0.184063	0.0498781	0.260494	0.384479	0.263396	0.303705	0.523456	0	0
NM_001033208.4	Myzap	myocardial zonula adherens protein (Myzap). mRNA	0.0306866	0.0896556	0.039496	0.0211074	0.0171829	0	1.07817	0.0366227	0.0170898	0	0.0577905	0.0622143	0.142248	0.0540297	0.0414019	0	0.0109336	0.0172149	0.106808	0
NM_001033209.3	Xylb	xylulokinase homolog (H. influenzae) (Xylb). transcript variant 1. mRNA	0	0	0.0233599	0	0	0	0.283415	0	0	0	0	0.0105133	0	0	0	0	0	0	0	0
NM_001033210.3	Pls1	plastin 1 (I-isoform) (Pls1). mRNA	0.348203	0.179936	0.347556	1.46637	0.376688	0.331253	0.621412	0.220501	0.831083	0.727442	1.85574	0.75466	0.7613	0.942556	1.06742	0.804415	0.459121	0.882346	0.677555	0.756715
NM_001033211.3	Ezhip	EZH inhibitory protein (Ezhip). transcript variant 2. mRNA	0	0	0	0	0	0	0	0	0	0	0	0	0	0	0	0	0	0	0	0
NM_001033212.2	Rprml	reprimo-like (Rprml). mRNA	0	0	0	0	0	0	0	0	0	0	0	0	0.0201961	0	0	0	0	0	0	0
NM_001033213.1	Ttc7b	tetratricopeptide repeat domain 7B (Ttc7b). transcript variant 1. mRNA	0.316555	0.395842	0.387874	0.365802	0.782756	0.10029	3.17154	0.586331	0.315919	0.16307	0.833024	0.891901	0.588525	0.713417	0.597929	0.136117	0	0.0568271	0.0512838	0
NM_001033214.2	E330034G19Rik	RIKEN cDNA E330034G19 gene (E330034G19Rik). transcript variant 1. mRNA	0	0	0	0	0	0	0	0	0	0	0	0.0135997	0	0	0	0	0	0	0	0
NM_001033215.3	Zfp957	zinc finger protein 957 (Zfp957). mRNA	0.006367	0	0	0	0	0	0.139183	0	0	0	0	0	0	0	0	0	0	0	0	0
NM_001033217.5	Prickle1	prickle planar cell polarity protein 1 (Prickle1). transcript variant 1. mRNA	0.004273	0	0.0164984	0.0235122	0.00957	0.0396592	0.0133445	0.0152982	0.0428329	0	0.0455987	0.111379	0.0369728	0.0150463	0.0345891	0.0365372	0.0243584	0	0	0.0511877
NM_001033219.4	Slc45a4	solute carrier family 45. member 4 (Slc45a4). transcript variant 1. mRNA	0	0	0	0	0	0	0	0	0	0	0	0	0	0	0	0	0	0	0	0
NM_001033220.3	AU021092	expressed sequence AU021092 (AU021092). mRNA	0	0	0	0	0	0	0	0	0	0	0	0	0	0	0	0	0	0	0	0
NM_001033221.3	Mpig6b	megakaryocyte and platelet inhibitory receptor G6b (Mpig6b). transcript variant 2. mRNA	0.303313	0.318114	1.62161	1.22504	1.49807	0.895108	2.11315	1.15093	0.606377	0	2.37762	3.73018	1.17769	1.24153	0.241338	0.261264	0.726006	1.64484	0.74318	0.263981
NM_001033222.3	Pdzd8	PDZ domain containing 8 (Pdzd8). mRNA	0.556915	0.918416	0.888823	1.22582	0.751197	0.113338	8.17085	0.543533	0.434216	0.208424	1.17467	0.790009	0.700663	0.806236	0.507601	0.133039	0.186963	0.165238	0.228692	0.133434
NM_001033223.2	Lin7a	lin-7 homolog A (C. elegans) (Lin7a). transcript variant 2. mRNA	0	0	0.009642	0.0103054	0	0	0.004679	0	0.001669	0	0	0	0	0.003517	0.002021	0.00183	0	0	0	0
NM_001033225.2	Pnrc1	proline-rich nuclear receptor coactivator 1 (Pnrc1). mRNA	1.932	3.47514	2.32976	3.62654	2.09286	0.569809	10.4041	2.03098	1.2821	1.10678	3.30973	3.76529	2.67837	3.15262	2.497	0.540392	0.894233	0.744502	0.697017	0.654931
NM_001033226.4	Calr4	calreticulin 4 (Calr4). transcript variant 2. mRNA	0	0	0	0	0.0253808	0	0	0	0	0	0	0	0	0	0	0	0	0	0	0
NM_001033227.2	Slc5a10	solute carrier family 5 (sodium/glucose cotransporter). member 10 (Slc5a10). transcript variant 1. mRNA	0.0154926	0.02829	0	0	0	0	0.145155	0	0	0	0	0	0	0.009093	0	0	0	0	0	0
NM_001033228.3	Itga1	integrin alpha 1 (Itga1). mRNA	0.0658545	0.271504	0.180821	0.245612	0.0786669	0	1.28887	0.003493	0.0342303	0	0.139638	0.0847708	0.0687423	0.0412265	0.0236933	0.007151	0.004171	0.00821	0.007409	0.0116877
NM_001033229.3	Cyp11b1	cytochrome P450. family 11. subfamily b. polypeptide 1 (Cyp11b1). mRNA	0	0	0	0	0	0	0	0	0	0	0	0	0	0	0	0	0	0	0	0
NM_001033231.4	Mcrip1	MAPK regulated corepressor interacting protein 1 (Mcrip1). transcript variant 1. mRNA	1.54795	4.07669	2.26359	2.67935	1.68471	0.530635	19.905	0.815281	1.12515	0.431967	2.51827	2.75314	1.76975	2.34586	1.50998	0.328473	1.28432	0.750155	0.837028	0.986697
NM_001033233.2	Tmprss11a	transmembrane protease. serine 11a (Tmprss11a). mRNA	0	0	0	0	0	0	0	0	0	0	0	0	0	0	0	0	0	0	0	0
NM_001033234.2	Gm9	predicted gene 9 (Gm9). mRNA	0	0	0	0	0	0	0	0	0	0	0	0	0	0	0	0	0	0	0	0
NM_001033235.3	Trim40	tripartite motif-containing 40 (Trim40). transcript variant 1. mRNA	0	0	0	0	0	0	0	0	0	0	0	0	0	0	0	0	0	0	0	0
NM_001033236.3	Vcpkmt	valosin containing protein lysine (K) methyltransferase (Vcpkmt). transcript variant 2. mRNA	0.0642224	0.241246	0.0236169	0.0883494	0.0719225	0	0	0	0.158394	0	0.103669	0.170064	0.124752	0.0538457	0	0.0336225	0.0130756	0.0205875	0.0580603	0.0488489
NM_001033237.2	Yeats2	YEATS domain containing 2 (Yeats2). transcript variant 2. mRNA	0.0479726	0.0891924	0	0.0639951	0	0	0	0	0	0	0	0	0	0	0	0	0	0	0	0
NM_001033238.1	Cblb	Casitas B-lineage lymphoma b (Cblb). mRNA	0.574764	1.23011	0.862762	1.12221	0.57388	0.255384	40.1657	0.712394	0.970311	0.312136	0.96853	1.08626	0.903946	0.931512	0.764252	0.490636	0.351345	0.25018	0.418948	0.156699
NM_001033239.3	Csta1	cystatin A1 (Csta1). mRNA	0.0320659	0.103054	0.0247627	0.0352898	0.0179552	0	0.741072	0.003827	0.007143	0	0.0120776	0.003715	0.0158551	0.0376388	0	0.007834	0.00914	0	0	0.004268
NM_001033240.4	Wfdc6a	WAP four-disulfide core domain 6A (Wfdc6a). transcript variant 2. mRNA	0	0	0	0	0	0	0	0	0	0	0	0	0	0	0	0	0	0	0	0
NM_001033241.3	Gm382	predicted gene 382 (Gm382). mRNA	0	0	0	0	0	0	0	0	0	0	0	0	0	0	0	0	0	0	0	0
NM_001033242.1	Cln5	ceroid-lipofuscinosis. neuronal 5 (Cln5). mRNA	0.576178	1.53701	1.08704	1.68866	0.777517	0.177156	10.6291	0.448458	0.406583	0.27476	1.17719	0.767019	0.698964	0.722523	0.748401	0.144266	0.122409	0.200764	0.212887	0.200072
NM_001033244.3	Fancd2	Fanconi anemia. complementation group D2 (Fancd2). transcript variant q. mRNA	0.197861	0.120434	0.139121	0.0856905	0.178498	0	0.766703	0.0918307	0.0857047	0.108895	0.195511	0.0785311	0.190232	0.292461	0.108758	0	0.0156661	0.0328884	0.102026	0.178019
NM_001033245.4	Hk3	hexokinase 3 (Hk3). transcript variant 1. mRNA	0.261165	1.03328	0.469194	0.800893	1.93462	0.168337	3.96777	1.71427	0.418159	0	0.648954	0.497971	0.100886	0.641848	1.14884	0.179456	0.244263	0.244185	0.196263	0
NM_001033246.3	Ccdc110	coiled-coil domain containing 110 (Ccdc110). mRNA	0	0	0	0	0	0	0	0	0	0	0	0	0	0	0	0	0	0	0	0
NM_001033247.1	Cfap44	cilia and flagella associated protein 44 (Cfap44). mRNA	0	0	0	0	0	0	0	0	0	0	0	0	0	0	0	0	0	0	0	0
NM_001033248.3	Gm266	predicted gene 266 (Gm266). mRNA	0	0	0	0	0	0	0	0	0	0	0	0	0	0	0	0	0	0	0	0.0378768
NM_001033249.3	Zfp583	zinc finger protein 583 (Zfp583). mRNA	0	0	0	0.017428	0	0	0	0	0	0	0	0	0	0	0	0	0	0	0	0
NM_001033250.4	Lemd1	LEM domain containing 1 (Lemd1). transcript variant 4. mRNA	0	0	0	0	0	0	0	0	0	0	0	0	0	0	0	0	0	0	0	0
NM_001033251.5	Gpr174	G protein-coupled receptor 174 (Gpr174). transcript variant 2. mRNA	0.107781	0	0.132219	0.162172	0	0	0	0.0442166	0	0.025025	0	0	0	0.120582	0	0	0	0	0	0.0134499
NM_001033252.2	Wmp	WAVE homology in membrane protrusions (Wmp). mRNA	0	0	0	0	0	0	0	0	0	0	0	0	0	0	0	0	0	0	0	0
NM_001033253.3	Plekhg1	pleckstrin homology domain containing. family G (with RhoGef domain) member 1 (Plekhg1). transcript variant 2. mRNA	0.0243593	0.0498187	0.0188114	0	0.0409199	0.009044	0	0.008721	0	0.006033	0	0.0903065	0.0406506	0.005719	0.0164326	0.0208297	0.0243017	0.0191315	0.003083	0.003242
NM_001033254.3	Pak6	p21 (RAC1) activated kinase 6 (Pak6). transcript variant 1. mRNA	0	0	0	0	0	0	0	0	0.0330085	0	0.0186035	0.0343329	0.0261665	0	0	0	0.0422357	0	0.016075	0
NM_001033255.2	Gm136	predicted gene 136 (Gm136). mRNA	0	0	0	0	0	0	0.0209897	0	0	0	0	0	0	0	0	0	0	0	0	0
NM_001033256.4	Spata5l1	spermatogenesis associated 5-like 1 (Spata5l1). mRNA	0.478144	0.450991	0.193829	0.414345	0.16022	0.0326151	2.21054	0.0359457	0	0.102567	0.425416	0.396917	0.269929	0.256316	0.294615	0	0.118046	0.0295691	0	0.0400914
NM_001033257.5	Phactr2	phosphatase and actin regulator 2 (Phactr2). transcript variant D. mRNA	0.0291455	0.203759	0.146031	0	0	0	1.13455	0.0993815	0.0336225	0	0.0209098	0	0.102937	0.114851	0	0	0	0	0	0
NM_001033258.4	Arfgef3	ARFGEF family member 3 (Arfgef3). mRNA	0	0.003114	0.0246934	0.0117304	0	0	0.0133153	0	0	0	0	0	0	0	0	0	0	0	0.001349	0
NM_001033259.4	Mcu	mitochondrial calcium uniporter (Mcu). mRNA; nuclear gene for mitochondrial product	0.155507	0.351889	0.23547	0.608226	0.481479	0.0603763	7.23735	0.40029	0.567173	0.260532	0.53595	0.533409	0.523917	0.408016	0.444299	0.216037	0.199899	0.236056	0.204539	0.158289
NM_001033260.2	Stox1	storkhead box 1 (Stox1). transcript variant 1. mRNA	0.005018	0.0109966	0.006459	0.0207113	0	0	0.0235096	0	0	0	0.0157516	0	0.024814	0.0176719	0.006771	0	0.007152	0	0	0
NM_001033261.2	Zfc3h1	zinc finger. C3H1-type containing (Zfc3h1). mRNA	0.769212	0.890122	0.59791	0.779353	0.607659	0.0592045	16.4428	0.324534	0.123398	0.143425	0.730236	0.490058	0.493323	0.613261	0.231002	0.0430609	0.0287077	0	0.109945	0.0888152
NM_001033262.2	Marchf9	membrane associated ring-CH-type finger 9 (Marchf9). mRNA	0.113957	0.243305	0.112824	0.0844139	0.0490848	0.0108484	0.424342	0.0209233	0.0146457	0	0.110056	0.0913998	0.249226	0.17492	0.0591345	0	0.0249863	0.009835	0.0332844	0.0233365
NM_001033263.5	Agap2	ArfGAP with GTPase domain. ankyrin repeat and PH domain 2 (Agap2). transcript variant 1. mRNA	0.0186158	0	0	0	0	0	0	0	0	0	0	0	0	0	0	0	0	0	0	0
NM_001033264.3	Gls2	glutaminase 2 (liver. mitochondrial) (Gls2). transcript variant 1. mRNA; nuclear gene for mitochondrial product	0	0	0	0	0	0	0	0	0	0	0	0	0	0	0	0	0	0	0	0
NM_001033266.2	Gm525	predicted gene 525 (Gm525). mRNA	0	0	0	0	0	0	0	0	0	0	0	0	0	0	0	0	0	0	0	0
NM_001033267.2	Qrich2	glutamine rich 2 (Qrich2). mRNA	0.008101	0	0	0	0	0.0100255	0.278303	0.0193362	0.0270694	0	0	0.009385	0.010014	0.009509	0	0	0	0.004545	0.0153798	0
NM_001033268.3	Fam120a	family with sequence similarity 120. member A (Fam120a). mRNA	1.8888	3.69551	2.64766	3.61342	1.81254	0.746909	49.1134	1.06724	1.38613	0.555787	3.14194	2.90712	2.71731	2.61219	1.63773	0.583579	0.68812	0.610392	1.15765	0.529536
NM_001033269.3	Eif4e1b	eukaryotic translation initiation factor 4E family member 1B (Eif4e1b). transcript variant 1. mRNA	0	0	0	0	0	0	0	0	0	0	0	0	0	0	0	0	0	0	0	0
NM_001033270.2	Slc4a7	solute carrier family 4. sodium bicarbonate cotransporter. member 7 (Slc4a7). transcript variant 11. mRNA	0.0959984	0.870855	0.695581	0.363581	0.0743267	0	9.0721	0.0891089	0.157089	0.0132085	0.474664	0.58766	0.383837	0	0	0.005791	0	0	0.0810016	0
NM_001033271.5	Pip4p1	phosphatidylinositol-4.5-bisphosphate 4-phosphatase 1 (Pip4p1). transcript variant 1. mRNA	0.976618	2.16759	1.80561	2.07836	1.20248	0.327196	31.5287	0.643943	0.510839	0.21381	0.636781	1.21269	1.44735	1.59602	0.880853	0.177963	0.507531	0.169508	0	0
NM_001033272.2	Spata13	spermatogenesis associated 13 (Spata13). transcript variant 1. mRNA	0	0	0	0	0	0	0	0	0.002581	0	0	0	0	0	0.0234519	0	0	0	0.0821342	0
NM_001033273.3	5031439G07Rik	RIKEN cDNA 5031439G07 gene (5031439G07Rik). transcript variant 2. mRNA	1.01756	0.992864	0.993834	1.00746	0.684888	0	2.03035	0.1564	0.0944491	0	1.41304	0.817167	0.770272	0.954621	0.454159	0.131836	0	0.0735175	0.125212	0.18812
NM_001033274.3	Brd1	bromodomain containing 1 (Brd1). mRNA	0.929077	1.20033	0.860093	1.45869	0.744556	0.151899	9.30108	0.205484	0.48039	0.181545	1.21996	1.10598	0.821839	1.09055	0.476099	0.0333192	0.126337	0.0765069	0.330117	0.108919
NM_001033275.5	Gxylt1	glucoside xylosyltransferase 1 (Gxylt1). transcript variant 1. mRNA	0	0	0	0	0	0	1.68743	0	0	0	0	0	0	0	0	0	0	0	0	0
NM_001033276.3	Kmt2d	lysine (K)-specific methyltransferase 2D (Kmt2d). mRNA	0.577276	0.776197	0.783359	0.757081	0.599498	0.106041	23.8596	0.132834	0.0531313	0.0754777	0.751386	0.550584	0.245144	0.527774	0.169834	0.0507172	0.0220317	0.0332023	0.162675	0.0105825
NM_001033277.3	Spryd3	SPRY domain containing 3 (Spryd3). mRNA	0.538849	1.63689	1.12069	1.68384	1.64651	0.211981	14.6778	0.494026	0.544539	0.318166	0.860216	1.07076	1.10721	1.35296	0.972553	0.204884	0.218691	0.232222	0.370361	0.0902505
NM_001033279.3	Ilrun	inflammation and lipid regulator with UBA-like and NBR1-like domains (Ilrun). transcript variant 1. mRNA	7.22261	8.09782	6.30972	5.60954	11.4254	5.0634	15.0882	6.06729	13.1623	4.68245	7.86815	8.70554	11.3533	10.1767	10.91	6.64528	3.91576	8.55212	8.2023	8.21953
NM_001033280.2	Gm94	predicted gene 94 (Gm94). mRNA	0	0	0	0	0	0	0	0	0	0	0	0	0	0	0	0	0	0	0	0
NM_001033281.3	Prdm6	PR domain containing 6 (Prdm6). mRNA	0	0	0	0	0	0	0	0	0	0	0	0	0	0	0	0	0	0	0	0
NM_001033283.2	Oosp3	oocyte secreted protein 3 (Oosp3). mRNA	0	0	0	0	0	0	0	0	0	0	0	0	0	0	0	0	0	0	0	0
NM_001033284.2	Cryzl2	crystallin zeta like 2 (Cryzl2). transcript variant 1. mRNA	0.191997	0.529785	0.350079	0.227442	0.24488	0.178206	0	0.133663	0.100986	0	0.515583	0.624046	0.329631	0.375608	0.27343	0.143329	0.144417	0.179514	0.0877517	0.0567921
NM_001033285.1	Cdc42bpa	CDC42 binding protein kinase alpha (Cdc42bpa). transcript variant 1. mRNA	0	0	0	0	0	0.0100162	0	0	0	0	0	0	0	0	0	0	0	0	0	0
NM_001033286.2	Slc30a10	solute carrier family 30. member 10 (Slc30a10). mRNA	0.0270098	0.008768	0.0231758	0.132113	0.008402	0.0241412	0.112472	0.0107449	0.0467979	0.0464538	0.165786	0.079967	0.0259684	0.0246587	0.066809	0.003666	0.0171085	0.006734	0.0151936	0.0399471
NM_001033288.3	Sbspon	somatomedin B and thrombospondin. type 1 domain containing (Sbspon). mRNA	0	0	0	0.008768	0	0.0157752	0.328433	0.007606	0	0	0	0	0	0.007481	0	0	0	0	0	0
NM_001033289.2	Slc9a2	solute carrier family 9 (sodium/hydrogen exchanger). member 2 (Slc9a2). mRNA	0	0	0	0.006898	0.0280766	0	0.203575	0.0179523	0.002792	0.0124182	0	0.005809	0.0247927	0	0	0.006125	0.0142922	0.0168773	0.006346	0.006674
NM_001033290.2	Gpr55	G protein-coupled receptor 55 (Gpr55). mRNA	0	0.0802682	0.123762	0.009449	0	0.0170001	0.0536266	0.008197	0	0.0425262	0.0517395	0.0636573	0	0.0161242	0.0370669	0.0167805	0	0	0	0
NM_001033291.2	Usp40	ubiquitin specific peptidase 40 (Usp40). transcript variant 2. mRNA	0	0	0.0535765	0	0	0.0193183	0.092086	0	0	0	0	0	0	0.0244305	0	0	0	0	0	0
NM_001033292.3	Espnl	espin-like (Espnl). mRNA	0.008046	0.009403	0.0186403	0	0.0108127	0.007966	0.62318	0.003841	0.001792	0	0.004041	0.005593	0.005968	0	0.008684	0	0	0	0.004073	0
NM_001033293.3	Uap1l1	UDP-N-acteylglucosamine pyrophosphorylase 1-like 1 (Uap1l1). transcript variant 1. mRNA	0.29107	0.527838	0.426302	0.241632	0.42713	0	0.391827	0.0598923	0.167691	0	0.220523	0.45349	0.632756	0.294531	0.155729	0.0490433	0	0	0	0
NM_001033294.3	Ddx31	DEAD/H box helicase 31 (Ddx31). transcript variant 1. mRNA	0.160513	0.472809	0	0.387331	0.082512	0.11072	0.460209	0	0.005862	0.0456185	0.0991103	0.155473	0.27323	0.111193	0.110056	0	0	0	0.0799307	0
NM_001033296.2	Sel1l2	sel-1 suppressor of lin-12-like 2 (C. elegans) (Sel1l2). mRNA	0	0	0	0	0	0	0	0	0	0	0	0	0	0	0	0	0	0	0	0
NM_001033297.3	Smim26	small integral membrane protein 26 (Smim26). mRNA	0.0737447	0.754098	0.711863	0.938403	0.12388	0.0456318	2.59101	0.0880101	0.0410695	0.0913193	0.532372	0.918423	0.957166	0.71413	0.0497477	0.0450424	0.367851	0.0827402	0.0933366	0.0736204
NM_001033298.4	Kiz	kizuna centrosomal protein (Kiz). mRNA	0.371786	0.826481	0.520128	0.361357	0.389208	0	0.832981	0.0578747	0.31058	0	0.40082	0.660128	0.589461	0.498067	0.474348	0.0444292	0.230377	0.0725457	0.209706	0.150616
NM_001033299.3	Zfp217	zinc finger protein 217 (Zfp217). transcript variant 1. mRNA	0.318863	0	0.380662	1.13372	1.21101	0	0.846705	0	0.154417	0	0.777457	0.631744	0	0.339926	1.03083	0	0	0	0.0292446	0.143529
NM_001033300.2	Gmps	guanine monophosphate synthetase (Gmps). mRNA	0.383498	0.742298	0.518271	0.696393	0.315667	0.156619	3.47933	0.251726	0.433559	0.230323	0.683704	0.599792	0.41717	0.39388	0.196616	0.0936944	0.226822	0.137689	0.19658	0.132722
NM_001033301.4	Fhdc1	FH2 domain containing 1 (Fhdc1). transcript variant 2. mRNA	0.0826985	0.146696	0.155858	0.123924	0.137267	0	1.47586	0.133945	0.830654	0.559581	0.291089	0.232676	0.277473	0.249612	0.149432	0.003608	0.225199	0.222024	0.510262	0.379379
NM_001033302.2	Ciart	circadian associated repressor of transcription (Ciart). mRNA	0	0.0275113	0.129275	0	0.0281208	0.0699196	1.11751	0	0	0.202114	0.0315258	0.043636	0	0.0221057	0.0169392	0	0.0536803	0	0	0.0668477
NM_001033303.2	Ampd1	adenosine monophosphate deaminase 1 (Ampd1). mRNA	0	0	0	0	0	0	0	0	0	0	0	0	0	0	0	0	0	0	0	0
NM_001033304.2	Elapor1	endosome-lysosome associated apoptosis and autophagy regulator 1 (Elapor1). transcript variant 2. mRNA	0	0	0	0	0	0.003763	0.0379855	0.003629	0.003387	0	0.003818	0	0	0	0	0	0	0	0	0
NM_001033305.3	Ndufb6	NADH:ubiquinone oxidoreductase subunit B6 (Ndufb6). mRNA	0.84747	2.34471	1.09076	1.69578	0.805278	0.508507	4.53152	0.674271	1.20137	0.795027	1.51539	1.56197	1.60313	1.34141	0.848883	0.501938	0.732003	0.547456	0.715079	0.68367
NM_001033306.1	Shb	src homology 2 domain-containing transforming protein B (Shb). mRNA	0.101459	0.0833705	0.0448888	0.0610641	0.0426089	0.039238	0.415887	0.0454071	0.0988821	0.007852	0.0398068	0.0808104	0.0783859	0.070711	0.0855545	0.030985	0.0361496	0.0142294	0.160517	0.0844067
NM_001033308.2	Themis2	thymocyte selection associated family member 2 (Themis2). mRNA	1.90853	3.85997	3.20133	3.02835	5.16977	2.6433	130.249	4.35809	4.01365	1.13902	2.79407	2.62215	1.48622	2.6082	2.19383	0.791165	0.761016	1.95194	1.56096	0.62364
NM_001033310.3	Cox18	cytochrome c oxidase assembly protein 18 (Cox18). transcript variant 2. mRNA; nuclear gene for mitochondrial product	0	0.449371	0.15163	0	0.0659673	0.0485989	1.206	0.0624885	0.01458	0.0810476	0.230082	0	0.105177	0.153649	0	0	0.111934	0	0.124257	0
NM_001033311.3	Vsig10	V-set and immunoglobulin domain containing 10 (Vsig10). mRNA	0.0302419	0.0883564	0.155694	0.163441	0.174177	0.0106932	1.09965	0.036092	0.0384964	0	0.154587	0.0375384	0.0534045	0.0659245	0.096176	0.0105551	0.006157	0.009695	0.005468	0.005751
NM_001033312.3	Fbxl18	F-box and leucine-rich repeat protein 18 (Fbxl18). mRNA	0	0	0	0	0	0	0	0	0	0	0	0	0	0	0	0	0	0	0.003915	0
NM_001033313.4	Pdap1	PDGFA associated protein 1 (Pdap1). transcript variant 1. mRNA	1.16271	2.36836	1.30153	2.01066	1.1233	0.491464	12.9779	0.986977	1.1309	0.77567	1.91725	2.41895	1.83708	1.84054	0.988732	0.400096	0.840213	0.629303	0.83944	0.83378
NM_001033314.3	Ccdc61	coiled-coil domain containing 61 (Ccdc61). mRNA	0	0	0.201872	0.563395	0.1171	0	4.20448	0.025998	0	0	0.268029	0.0656169	0.301595	0.219902	0.152832	0	0	0	0	0
NM_001033315.2	Hipk4	homeodomain interacting protein kinase 4 (Hipk4). mRNA	0	0	0.009334	0	0.008122	0	0.181198	0	0	0	0	0	0.0179298	0	0	0	0	0	0	0
NM_001033316.2	Ffar3	free fatty acid receptor 3 (Ffar3). mRNA	0.0215561	0.0787246	0	0.0444815	0	0	0.471254	0	0.0120049	0	0.0270637	0	0	0.0126513	0.0290833	0	0	0	0	0
NM_001033317.3	Cnga4	cyclic nucleotide gated channel alpha 4 (Cnga4). mRNA	0	0	0	0.009715	0.007909	0	0	0	0	0	0	0	0	0.00829	0	0	0	0	0	0
NM_001033318.3	Cog7	component of oligomeric golgi complex 7 (Cog7). mRNA	0.300611	0.550035	0	0.317468	0.166626	0	1.65008	0.130459	0.294244	0	0.388853	0.36937	0.356583	0.310085	0.262193	0	0	0.0272549	0.0153727	0
NM_001033319.2	Ppfia1	protein tyrosine phosphatase. receptor type. f polypeptide (PTPRF). interacting protein (liprin). alpha 1 (Ppfia1). transcript variant B. mRNA	0	0	0	0.004648	0	0	0.0105515	0	0	0	0	0	0	0	0	0	0	0	0	0
NM_001033321.2	Tmem231	transmembrane protein 231 (Tmem231). transcript variant 1. mRNA	0.0119838	0.140051	0	0.14013	0.0335516	0.003708	0.39298	0.0429061	0.0333699	0.00742	0.0752285	0.0416505	0.0740684	0.0773661	0.008084	0	0	0	0.0151676	0
NM_001033322.2	Gucy1a2	guanylate cyclase 1. soluble. alpha 2 (Gucy1a2). mRNA	0	0.001864	0.008211	0.0008776	0.001429	0.0007895	0.0577793	0.0007614	0.001421	0.00158	0	0.0007391	0	0	0	0	0	0	0	0
NM_001033324.3	Zbtb16	zinc finger and BTB domain containing 16 (Zbtb16). transcript variant 1. mRNA	0.118527	0	0.318436	0	0	0.0398753	1.03864	0	0.105102	0	0	0	0.129446	0	0	0.0590404	0.0328007	0.0413158	0.0553458	0.0444206
NM_001033325.2	Pate14	prostate and testis expressed 14 (Pate14). mRNA	0	0	0	0	0	0	0	0	0	0	0	0	0	0	0	0	0	0	0	0
NM_001033326.3	Dhrsx	dehydrogenase/reductase (SDR family) X chromosome (Dhrsx). transcript variant 1. mRNA	0	0.870119	0.362831	0.688047	0.478645	0.275722	9.35792	0	0.349443	0.501106	0.182673	0.28445	0	0	0.0552106	0	0	0.0816233	0	0.21788
NM_001033328.3	Tmem185a	transmembrane protein 185A (Tmem185a). transcript variant 2. mRNA	0.0576842	0.1422	0	0	0	0.0981581	0.146375	0	0	0.0982181	0	0.150364	0	0	0	0.044041	0	0.0525855	0	0.0383913
NM_001033329.3	Arhgef9	CDC42 guanine nucleotide exchange factor (GEF) 9 (Arhgef9). transcript variant 1. mRNA	0	0	0	0	0	0	0	0	0	0	0	0	0	0	0	0	0	0	0	0
NM_001033330.4	Frmpd4	FERM and PDZ domain containing 4 (Frmpd4). transcript variant 1. mRNA	0	0	0	0	0	0	0	0	0	0	0	0	0	0	0	0	0	0	0	0
NM_001033331.2	Gas2l3	growth arrest-specific 2 like 3 (Gas2l3). transcript variant 1. mRNA	0.00779	0.0246561	0.0317498	0.0142886	0.0203558	0.0112473	0.0283835	0.0232421	0.0231378	0.006431	0	0.004512	0	0	0.007007	0	0	0	0.026292	0
NM_001033332.2	Tmtc3	transmembrane and tetratricopeptide repeat containing 3 (Tmtc3). transcript variant 2. mRNA	0	0	0.008085	0.008642	0	0	0.0784779	0	0	0.046675	0	0	0.007765	0	0.0339026	0	0	0	0.007951	0
NM_001033333.3	Myrfl	myelin regulatory factor-like (Myrfl). mRNA	0	0	0	0.0154747	0	0	0.0351311	0	0	0	0.007061	0	0	0	0	0	0	0	0	0
NM_001033334.2	Syndig1l	synapse differentiation inducing 1 like (Syndig1l). mRNA	0	0	0	0	0	0	0	0	0	0	0	0.00406	0	0	0	0.0171229	0	0	0	0
NM_001033335.3	Serpina3f	serine (or cysteine) peptidase inhibitor. clade A. member 3F (Serpina3f). transcript variant 2. mRNA	0	0	0	0	0	0	0	0	0	0	0	0	0	0	0	0	0	0	0	0
NM_001033336.3	Abcc4	ATP-binding cassette. sub-family C (CFTR/MRP). member 4 (Abcc4). transcript variant 1. mRNA	0.261386	0	0	0	0.143795	0.0699929	0	0.003649	0.0170257	0.003786	0.270596	0.419699	0.385463	0.322961	0.253666	0.003735	0	0	0	0
NM_001033337.4	Ttc38	tetratricopeptide repeat domain 38 (Ttc38). mRNA	0.0720852	0.312515	0.203515	0.444648	0.37239	0.0345328	1.44518	0.0915798	0	0	0.610165	0.474133	0.511648	0.469467	0.235298	0.0340868	0	0.0104359	0.0382603	0
NM_001033338.3	Rimbp3	RIMS binding protein 3 (Rimbp3). mRNA	0	0	0	0	0	0	0.0140302	0	0	0	0	0	0	0	0	0	0	0	0	0
NM_001033339.4	Mmp25	matrix metallopeptidase 25 (Mmp25). transcript variant 1. mRNA	0.128852	0.0522864	0.0859925	0.200237	0.435576	0.230335	3.73355	1.16188	0.640522	0	0.347515	0.0774034	0.0766901	0.464942	0.395982	0.177807	0.0884188	0.431033	0.320129	0.0730521
NM_001033340.3	Lrrc30	leucine rich repeat containing 30 (Lrrc30). mRNA	0	0	0	0	0	0	0	0	0	0	0	0	0	0	0	0.0121632	0	0	0	0
NM_001033341.2	Zfp407	zinc finger protein 407 (Zfp407). mRNA	0.207054	0.43187	0.266495	0.424976	0.22692	0.0739951	2.11631	0.163858	0.171426	0.0603292	0.314172	0.271946	0.224468	0.350913	0.191216	0.0513981	0.0599652	0.0732961	0.0868872	0.0383197
NM_001033342.1	Cdc42bpg	CDC42 binding protein kinase gamma (DMPK-like) (Cdc42bpg). mRNA	0.0569787	0.239037	0	0.158779	0.0965334	0	16.7775	0.228413	0.0976378	0	0.0293484	0.0812442	0	0.0703111	0.0611056	0.0214165	0.043726	0.009835	0.0480775	0
NM_001033343.1	Sec31b	Sec31 homolog B (S. cerevisiae) (Sec31b). mRNA	0.0647358	0.0521753	0.0919391	0.0767721	0.0599978	0.002763	3.86923	0.0452894	0.0174046	0.005529	0.050447	0.0232751	0.0524285	0.0393034	0.0632466	0.0136344	0.0127256	0.005009	0.0423798	0.005943
NM_001033344.3	Dusp27	dual specificity phosphatase 27 (putative) (Dusp27). transcript variant 1. mRNA	0	0.0126598	0	0	0	0.005362	0.0135327	0.005171	0	0	0	0	0	0	0	0	0	0	0	0
NM_001033346.4	Lrrc55	leucine rich repeat containing 55 (Lrrc55). mRNA	0	0	0	0	0	0	0	0	0	0	0	0	0	0	0	0	0	0	0	0
NM_001033347.2	D430041D05Rik	RIKEN cDNA D430041D05 gene (D430041D05Rik). transcript variant 2. mRNA	0	0	0	0	0	0	0	0	0	0	0	0	0	0	0	0	0	0	0	0
NM_001033348.3	Ralgapa2	Ral GTPase activating protein. alpha subunit 2 (catalytic) (Ralgapa2). mRNA	0.0972718	0.136785	0.248052	0.215104	0.108934	0.0551271	2.16343	0	0.109357	0.0472807	0.217998	0.007372	0.100014	0.100305	0.159448	0	0.005182	0.0163196	0.0759395	0
NM_001033349.2	Ankub1	ankrin repeat and ubiquitin domain containing 1 (Ankub1). mRNA	0.009957	0.0290909	0	0.0273953	0.0167262	0	0.886256	0.0178247	0	0	0.037503	0.0115354	0.0123082	0.005844	0	0	0	0	0.006301	0.006627
NM_001033350.3	Bank1	B cell scaffold protein with ankyrin repeats 1 (Bank1). transcript variant 1. mRNA	1.63728	4.99105	2.69363	3.84489	0.570183	0.371421	26.9478	0.415746	0.420843	0.212371	4.86483	2.09861	2.7659	4.22741	1.20392	0.121117	0.576677	0.114249	0.685101	0.107006
NM_001033351.2	Grin3a	glutamate receptor ionotropic. NMDA3A (Grin3a). transcript variant 2. mRNA	0.007995	0	0.0426326	0	0.0217453	0	0.795481	0.005453	0	0	0.0157742	0	0	0	0	0	0	0	0	0
NM_001033352.3	Klhl21	kelch-like 21 (Klhl21). mRNA	0.382213	0.693009	0.515088	0.630963	0.339914	0.136339	2.40142	0.244174	0.13022	0.0946603	0.688753	0.653784	0.555846	0.807553	0.403441	0.112606	0.253138	0.156399	0.18212	0.104745
NM_001033354.3	Iqsec3	IQ motif and Sec7 domain 3 (Iqsec3). transcript variant 1. mRNA	0	0	0	0	0	0	0	0	0	0	0	0	0	0	0	0	0	0	0	0
NM_001033355.3	Zfp568	zinc finger protein 568 (Zfp568). transcript variant 2. mRNA	0	0	0	0.0736721	0	0	0.813454	0.11911	0.0271133	0	0	0	0	0	0	0	0	0	0.0554571	0
NM_001033356.3	Ntn5	netrin 5 (Ntn5). transcript variant 1. mRNA	0	0	0	0	0	0	0	0	0	0	0	0	0	0	0	0	0	0	0	0
NM_001033359.2	Cntn5	contactin 5 (Cntn5). transcript variant 2. mRNA	0	0	0	0	0	0	0	0	0	0	0	0	0	0	0	0	0	0	0	0
NM_001033360.3	Gpr101	G protein-coupled receptor 101 (Gpr101). mRNA	0	0	0	0.004441	0	0	0	0	0	0	0	0	0	0	0	0	0	0	0	0
NM_001033361.3	Pgr15l	G protein-coupled receptor 15-like (Pgr15l). mRNA	0	0	0	0	0	0	0	0	0	0	0	0	0	0	0	0	0	0	0	0
NM_001033362.3	Gm614	predicted gene 614 (Gm614). transcript variant 1. mRNA	0.17491	0.187377	0	0	0	0.230893	101.131	0.918481	0	0.158836	0.32208	0.229656	0.216214	0.424306	0.314649	0.2564	0.13295	0.0915816	0.280414	0.0620856
NM_001033364.3	Cdhr2	cadherin-related family member 2 (Cdhr2). mRNA	0	0	0	0	0	0	0	0.00253	0	0	0	0	0	0	0	0	0	0	0	0
NM_001033365.3	Mroh5	maestro heat-like repeat family member 5 (Mroh5). transcript variant 2. mRNA	0	0	0	0	0	0	0	0	0	0	0	0	0	0	0	0	0	0	0	0
NM_001033366.3	Mucl3	mucin like 3 (Mucl3). mRNA	0.003358	0.0343363	0.008644	0.004619	0.00376	0	0.26217	0.0120221	0.00748	0	0.008431	0.00778	0.004151	0.007883	0.00453	0	0.004786	0.003767	0.00425	0.00447
NM_001033367.3	Nlrc4	NLR family. CARD domain containing 4 (Nlrc4). mRNA	0.100395	0	0	0.188334	0.005111	0.0141187	0	0.0844157	0	0.053684	0.194798	0.0925191	0.0846151	0.0723129	0.144687	0.0167236	0	0.0844811	0	0
NM_001033369.3	Acvr1c	activin A receptor. type IC (Acvr1c). transcript variant 2. mRNA	0	0	0	0	0	0	0.119926	0	0	0	0	0	0	0	0	0	0	0	0.002558	0
NM_001033371.3	Lrrc36	leucine rich repeat containing 36 (Lrrc36). transcript variant 3. mRNA	0	0	0	0	0	0	0	0	0	0	0	0	0	0	0	0	0	0	0	0
NM_001033372.2	Gm648	predicted gene 648 (Gm648). mRNA	0	0	0	0	0	0	0	0	0	0	0	0	0	0	0	0	0	0	0	0
NM_001033373.3	Cdk15	cyclin-dependent kinase 15 (Cdk15). transcript variant 1. mRNA	0	0	0	0	0	0	0	0	0	0	0	0	0	0	0	0	0	0	0	0
NM_001033374.3	Srarp	steroid receptor associated and regulated protein (Srarp). mRNA	0	0	0	0	0	0	0	0	0	0	0	0	0	0	0	0	0	0	0	0
NM_001033375.2	Washc4	WASH complex subunit 4 (Washc4). mRNA	0.434648	0.86405	0.890082	1.31299	0	0.441783	12.1517	0.188952	0.558988	0.149817	0.853243	0.507009	0.295415	0.313827	0.431251	0.0456147	0	0.28154	0.147455	0
NM_001033379.3	Dcp1b	decapping mRNA 1B (Dcp1b). mRNA	0.021159	0.224095	0.136166	0.171009	0.0918216	0.0654639	2.14765	0.0946953	0.182648	0.0327519	0.159391	0.239003	0.111161	0.108659	0.142737	0.0452328	0	0.04748	0	0
NM_001033380.3	Itpripl2	inositol 1.4.5-triphosphate receptor interacting protein-like 2 (Itpripl2). mRNA	0.283392	0.44369	0.52831	0.734258	0.641855	0.037745	0.853309	0.0667324	0.0849283	0.0346208	0.354203	0.295925	0.19165	0.411703	0.284618	0.009314	0.0144892	0.0413491	0.048253	0.0304482
NM_001033382.3	Cacna2d4	calcium channel. voltage-dependent. alpha 2/delta subunit 4 (Cacna2d4). transcript variant 1. mRNA	0	0	0	0	0	0	0	0	0	0	0	0	0	0	0	0	0	0	0	0
NM_001033383.2	Zfp865	zinc finger protein 865 (Zfp865). transcript variant 1. mRNA	0.0442506	0	0.0512585	0	0	0	0.0967392	0	0	0	0	0	0	0	0.0477618	0	0	0	0	0
NM_001033385.3	Tbc1d32	TBC1 domain family. member 32 (Tbc1d32). mRNA	0.0265041	0.0351981	0.0372139	0.0397757	0.005397	0.005964	0.669723	0.0115022	0	0.004476	0.0317633	0.0362883	0.0342519	0.0296963	0.0227557	0	0.0103018	0.002703	0.009149	0.003207
NM_001033389.4	Fubp3	far upstream element (FUSE) binding protein 3 (Fubp3). transcript variant 1. mRNA	0.009167	0	0.0117992	0.104044	0.0153999	0	0.880396	0.0164112	0	0	0.158258	0.0477929	0	0.0430427	0.04329	0	0.0130653	0	0	0
NM_001033391.2	Ipcef1	interaction protein for cytohesin exchange factors 1 (Ipcef1). transcript variant 4. mRNA	0	0.0108967	0.14401	0	0.0250608	0	1.49095	0	0	0	0	0	0	0	0.0100639	0	0	0	0	0
NM_001033393.2	Tmem104	transmembrane protein 104 (Tmem104). mRNA	0.351587	0.499651	0.346767	0.48367	0.599171	0.0945891	2.20801	0.0661324	0.0340529	0.0283941	0.441417	0.358619	0.285803	0.403719	0.2346	0.0303444	0.087144	0.0514531	0.0967377	0.0152606
NM_001033394.3	Tmem88b	transmembrane protein 88B (Tmem88b). mRNA	0.0302755	0.169538	0.100664	0.0902402	0.0621599	0.0249785	6.18536	0.0421541	0.0112406	0.0593602	0.0791893	0.0701495	0.0654932	0.0651516	0.0408473	0.006164	0.0179785	0.0113228	0.00958	0.0167914
NM_001033397.5	Krt26	keratin 26 (Krt26). mRNA	0	0	0	0	0	0	0	0	0	0	0	0	0	0	0	0	0	0	0	0
NM_001033399.4	Gfod1	glucose-fructose oxidoreductase domain containing 1 (Gfod1). mRNA	0.136872	0.205714	0.323534	0.110441	0.269718	0.0618916	8.27803	0.245024	0.187634	0.140156	0.406475	0.112828	0.203357	0.15757	0.0870061	0.128615	0	0.0738308	0.116601	0.194451
NM_001033400.2	Nutm2	NUT family member 2 (Nutm2). mRNA	0	0	0	0	0	0	0	0	0	0	0	0	0	0	0	0	0	0	0	0
NM_001033404.2	Ftdc1	ferritin domain containing 1 (Ftdc1). mRNA	0	0	0	0	0	0	0	0	0	0	0	0	0	0	0	0	0	0	0	0
NM_001033405.2	Treml2	triggering receptor expressed on myeloid cells-like 2 (Treml2). transcript variant 1. mRNA	0.073802	0	0	0	0	0	3.40884	0	0.802559	0.0577201	0	0.175502	0	0	0	0	1.30093	0	0	0
NM_001033407.2	Gm815	predicted gene 815 (Gm815). mRNA	0	0	0	0	0	0	0	0	0	0	0	0	0	0	0	0	0	0	0	0
NM_001033408.4	Rbm44	RNA binding motif protein 44 (Rbm44). mRNA	0	0	0	0	0	0	0	0	0	0	0	0	0	0	0	0	0	0	0	0
NM_001033409.3	Lgr6	leucine-rich repeat-containing G protein-coupled receptor 6 (Lgr6). mRNA	0	0	0	0	0	0	0	0	0	0	0	0	0	0	0	0	0	0	0	0
NM_001033410.2	Rnf224	ring finger protein 224 (Rnf224). mRNA	0	0	0	0	0	0	0	0	0	0	0	0	0	0	0	0	0	0	0	0
NM_001033411.3	Gm826	predicted gene 826 (Gm826). mRNA	0	0	0	0	0	0	0	0	0	0	0	0	0	0	0	0	0	0	0	0
NM_001033412.3	Gm829	predicted gene 829 (Gm829). mRNA	0	0	0	0	0	0	0	0	0	0	0	0	0	0	0	0	0	0	0	0
NM_001033415.3	Shisa3	shisa family member 3 (Shisa3). mRNA	0	0.006816	0.006005	0.006418	0.005225	0.002887	0.131138	0	0.0363762	0	0.008786	0	0	0	0	0	0.006649	0.002617	0	0.00621
NM_001033418.4	Bsph1	binder of sperm protein homolog 1 (Bsph1). transcript variant 1. mRNA	0	0	0	0	0	0	0	0	0	0	0	0	0	0	0	0	0	0	0	0
NM_001033419.2	Ceacam16	carcinoembryonic antigen-related cell adhesion molecule 16 (Ceacam16). mRNA	0	0.10954	0	0.117892	0.071979	0.0662847	3.26187	0.006392	0	0	0.0537964	0	0	0	0.0144527	0	0	0	0.0203371	0
NM_001033420.2	Dock1	dedicator of cytokinesis 1 (Dock1). mRNA	0.107939	0.240275	0.203427	0.256321	0.0719526	0.0286245	0.393288	0.0828122	0.0858754	0.0222771	0.245222	0.136959	0.0794211	0.0874821	0.119624	0.0282547	0.0293016	0.0129756	0.0471648	0.0821006
NM_001033421.3	Pate2	prostate and testis expressed 2 (Pate2). mRNA	0	0	0	0	0	0	0	0	0.004404	0	0	0	0	0	0	0	0	0	0	0
NM_001033422.1	Thoc2	THO complex 2 (Thoc2). mRNA	0.401653	0.873413	0.543545	0.775142	0.336715	0.136339	10.0352	0.186262	0.23519	0	0.62242	0.331044	0.363154	0.540157	0.301918	0.0364482	0.130842	0.15837	0.25999	0.0595736
NM_001033423.2	Gm773	predicted gene 773 (Gm773). mRNA	0	0	0	0	0	0	0	0	0	0	0	0	0	0	0	0	0	0	0	0
NM_001033424.3	Fnd3c2	fibronectin type III domain containing 3C2 (Fnd3c2). mRNA	0	0	0	0	0	0	0.007477	0	0	0	0	0	0	0	0	0	0	0	0	0
NM_001033425.4	Zscan10	zinc finger and SCAN domain containing 10 (Zscan10). transcript variant 1. mRNA	0	0	0	0	0	0	0.149288	0	0	0	0	0	0	0	0	0	0	0	0	0
NM_001033426.3	Grxcr2	glutaredoxin. cysteine rich 2 (Grxcr2). mRNA	0	0	0	0	0	0	0	0	0	0	0	0	0	0	0	0	0	0	0	0
NM_001033427.3	Lyg2	lysozyme G-like 2 (Lyg2). mRNA	0	0.009979	0	0	0	0	0	0	0	0	0	0	0	0	0	0	0	0	0	0
NM_001033428.2	Tmem211	transmembrane protein 211 (Tmem211). mRNA	0	0	0	0	0	0	0	0	0	0	0	0	0	0	0	0	0	0	0	0
NM_001033429.2	Trim75	tripartite motif-containing 75 (Trim75). mRNA	0	0	0	0	0	0	0.0436894	0	0	0	0	0	0	0	0	0	0	0	0	0
NM_001033430.4	Kdm7a	lysine (K)-specific demethylase 7A (Kdm7a). mRNA	2.78767	3.57013	3.61744	3.60794	4.40105	1.0006	26.8199	2.00425	2.55363	1.06478	3.41475	2.29394	2.49296	3.21405	2.00979	1.51958	0.889703	0.939034	1.89698	1.50695
NM_001033431.1	Nlrp12	NLR family. pyrin domain containing 12 (Nlrp12). mRNA	0.386376	0.147756	0.583216	0.859909	2.57582	0.150209	0.151626	0.144854	0.202786	0.0526051	0.736532	0.475748	0.215052	0.774082	0.966167	0.017298	0.0172982	0.165686	0.089612	0.0107707
NM_001033432.3	Heca	hdc homolog. cell cycle regulator (Heca). mRNA	1.30868	0.463985	0.390357	0.597918	0.954772	0.531977	2.40903	0.493062	0.311213	0.118289	2.2457	0.379034	0.472325	0.611086	0.38664	0.423001	0.762386	0.152726	0.489654	0.330593
NM_001033433.4	Tmem102	transmembrane protein 102 (Tmem102). mRNA	0.004512	0	0	0	0	0	0	0	0.0100505	0	0	0.0209075	0	0	0	0	0.01286	0	0	0
NM_001033434.2	Gm884	predicted gene 884 (Gm884). mRNA	0	0	0	0.002633	0	0.007105	0	0	0	0	0	0	0.004731	0	0	0	0	0	0	0
NM_001033435.3	Milr1	mast cell immunoglobulin like receptor 1 (Milr1). transcript variant 1. mRNA	0.466226	0.812368	0.216892	0.680014	0.912146	0.069516	4.01735	0	0.857152	0.271278	0.53598	0.462041	0.166647	0.534067	0.265252	0.247025	0	0.346631	0.341256	0.254216
NM_001033436.3	Atxn7l1	ataxin 7-like 1 (Atxn7l1). transcript variant 1. mRNA	0	0	0	0	0.16428	0.147766	0	0.11807	0.121593	0.0168978	0	0	0.0506043	0	0.0644375	0.195865	0.175031	0.195207	0.487908	0.544912
NM_001033437.2	Lsmem1	leucine-rich single-pass membrane protein 1 (Lsmem1). mRNA	0.0938528	0.0843709	0.223007	0.0198633	0.137445	0.053607	0.0450941	0.034464	0	0.0536398	0.652608	0.0585471	0.0535454	0.169483	0.0389615	0.0264573	0.0617345	0.0162002	0.082237	0.0384388
NM_001033438.2	Gm906	predicted gene 906 (Gm906). mRNA	0	0	0	0	0	0	0	0	0	0	0	0	0	0	0	0	0	0	0	0
NM_001033439.3	Lrch1	leucine-rich repeats and calponin homology (CH) domain containing 1 (Lrch1). transcript variant 1. mRNA	0.35755	0.35994	0.22652	0.298182	0.0601665	0.217806	8.92173	0.327222	0.222855	0.167469	0.451229	0.341255	0.0778619	0.269645	0.0574882	0.108628	0.0554461	0.108086	0.215719	0
NM_001033441.3	Alg10b	asparagine-linked glycosylation 10B (alpha-1.2-glucosyltransferase) (Alg10b). mRNA	0.317204	0.614409	0.517137	0.749912	0.297346	0.0668805	11.4623	0.179468	0.133473	0.0872887	0.4543	0.234103	0.374681	0.397155	0.202888	0.0631463	0.0535794	0.047453	0.101113	0.0250208
NM_001033442.3	Gm1604b	predicted gene 1604b (Gm1604b). mRNA	0.0448511	0	0	0	0	0	0.0700373	0.0802909	0.0749348	0	0.0281553	0	0	0	0.0302563	0	0	0	0	0
NM_001033443.4	Cdkl4	cyclin-dependent kinase-like 4 (Cdkl4). transcript variant 3. mRNA	0.0418289	0.174585	0	0.090425	0	0.0702536	0.606524	0.0178287	0.0399345	0	0.0525162	0	0.0664796	0.0280564	0.0443418	0	0	0	0	0
NM_001033444.2	Capn13	calpain 13 (Capn13). mRNA	0	0	0	0	0	0	0	0	0	0	0	0	0	0	0	0	0	0	0	0
NM_001033445.2	Garem1	GRB2 associated regulator of MAPK1 subtype 1 (Garem1). mRNA	0.0329562	0.005349	0.0377041	0.0125936	0.0656133	0.0385194	0.909174	0.0742925	0.338525	0.0997582	0.0206882	0.031817	0.0407384	0.0193419	0.0345831	0.0760437	0.0156563	0.1212	0.0648848	0.0243708
NM_001033446.2	Arl14epl	ADP-ribosylation factor-like 14 effector protein-like (Arl14epl). mRNA	0	0	0	0.0375298	0	0	0.0608579	0	0	0	0.0195721	0	0	0	0	0	0	0	0	0
NM_001033447.3	Gm960	predicted gene 960 (Gm960). mRNA	0	0	0	0	0	0	0	0	0	0	0.009721	0	0	0	0	0	0	0	0	0
NM_001033448.3	Ap5b1	adaptor-related protein complex 5. beta 1 subunit (Ap5b1). transcript variant 1. mRNA	0.0445942	0	0.0645706	0.0766841	0.0249704	0	0.705065	0.103115	0.0248352	0	0.0209955	0	0	0.0458014	0	0	0	0	0	0
NM_001033449.2	Tmem237	transmembrane protein 237 (Tmem237). transcript variant 1. mRNA	0	0.013631	0	0.218221	0	0	0.582835	0	0.0935388	0	0.0468605	0.054051	0.213388	0	0	0	0	0	0	0
NM_001033450.4	Ifi211	interferon activated gene 211 (Ifi211). transcript variant 1. mRNA	0.753833	2.24534	0	0.707067	0.729094	1.09042	14.3398	0.327148	3.82746	0.818314	1.13695	1.71831	0.732161	0.810151	0.495322	0.568065	2.11383	1.08195	1.54268	0.990385
NM_001033451.3	Zfp408	zinc finger protein 408 (Zfp408). transcript variant 2. mRNA	0.0910019	0.368136	0.261282	0	0	0	6.34731	0.0194933	0	0.138694	0.178703	0.113537	0	0.367015	0.0314817	0	0.0665103	0	0.0885989	0
NM_001033452.4	Accsl	1-aminocyclopropane-1-carboxylate synthase (non-functional)-like (Accsl). transcript variant 1. mRNA	0	0	0	0	0	0	0	0	0	0	0	0	0	0	0	0	0	0	0.0298887	0
NM_001033453.3	Pdp1	pyruvate dehyrogenase phosphatase catalytic subunit 1 (Pdp1). transcript variant 3. mRNA; nuclear gene for mitochondrial product	0	0.441865	0	0.378803	0	0	1.47237	0.0846453	0.0789987	0	0.193807	0	0.17019	0.264447	0.0900625	0.0254825	0	0.028086	0	0
NM_001033455.2	Ccdc27	coiled-coil domain containing 27 (Ccdc27). mRNA	0	0	0	0	0	0	0	0	0	0	0	0	0	0	0	0	0	0	0	0
NM_001033457.2	Nom1	nucleolar protein with MIF4G domain 1 (Nom1). transcript variant 1. mRNA	0.229932	0.350338	0.372311	0.370731	0.174435	0.140747	3.17354	0.31867	0.352488	0.223496	0.428363	0.532761	0.528724	0.522373	0.276864	0	0.348838	0.16089	0.228434	0.131638
NM_001033458.4	Gm1673	predicted gene 1673 (Gm1673). transcript variant 1. mRNA	0	0	0	0.0487736	0	0	0	0	0	0	0	0	0	0	0	0	0	0	0	0
NM_001033460.4	Drc1	dynein regulatory complex subunit 1 (Drc1). mRNA	0	0	0	0	0	0	0	0	0	0	0	0	0	0	0	0	0	0	0	0
NM_001033461.3	Lrrc43	leucine rich repeat containing 43 (Lrrc43). transcript variant 1. mRNA	0	0	0	0	0	0	0	0	0	0	0	0	0	0	0	0	0	0	0	0
NM_001033463.4	Tatdn2	TatD DNase domain containing 2 (Tatdn2). transcript variant 2. mRNA	0.0450675	0.0946391	0.087008	0.112372	0.119869	0	0.800517	0	0.0752963	0.020928	0.17682	0.0750542	0.362113	0.0529001	0	0	0	0	0	0
NM_001033464.4	Cracr2a	calcium release activated channel regulator 2A (Cracr2a). transcript variant 2. mRNA	0.022512	0.0328862	0.038633	0.0722618	0.0336149	0	2.13266	0	0.0250746	0	0	0.0347742	0.027828	0.008808	0.0404972	0	0	0.008419	0	0
NM_001033465.3	Spef1l	sperm flagellar 1 like (Spef1l). transcript variant 1. mRNA	0	0	0	0	0	0	0	0	0	0	0	0	0	0	0	0	0	0	0	0
NM_001033466.3	Zbtb2	zinc finger and BTB domain containing 2 (Zbtb2). transcript variant 1. mRNA	0.119404	0	0.111769	0.429319	0	0	0.381385	0	0	0	0	0.125756	0	0.1306	0.380777	0	0.108292	0	0	0
NM_001033468.3	Adgrg5	adhesion G protein-coupled receptor G5 (Adgrg5). transcript variant 2. mRNA	0	0	0	0	0	0	0	0.0668996	0.0208123	0	0	0	0	0	0	0	0	0.0838583	0	0.0165812
NM_001033469.2	Foxr1	forkhead box R1 (Foxr1). mRNA	0.0105128	0.0230361	0.0541232	0	0	0	0.656652	0.0125465	0.023419	0	0	0.0548069	0.0389859	0.0123399	0.0141838	0.0128422	0.007491	0	0	0
NM_001033471.3	Cpxcr1	CPX chromosome region. candidate 1 (Cpxcr1). mRNA	0	0	0	0	0	0	0	0	0	0	0	0	0	0	0	0	0	0	0	0
NM_001033472.2	Bclaf3	Bclaf1 and Thrap3 family member 3 (Bclaf3). transcript variant 1. mRNA	0.0208133	0.0608092	0	0.15032	0	0	0	0	0	0	0.169852	0.0602815	0	0.0549687	0	0.003178	0	0	0.0395141	0
NM_001033473.2	Odf3l2	outer dense fiber of sperm tails 3-like 2 (Odf3l2). mRNA	0	0	0	0	0	0	0	0	0	0	0	0	0	0	0	0	0	0	0	0
NM_001033474.2	Atxn7l3b	ataxin 7-like 3B (Atxn7l3b). mRNA	1.59266	3.22035	2.65296	3.77076	2.34099	0.579885	12.7535	0.895321	1.04652	0.520111	3.46269	2.52017	2.20583	2.41376	1.42488	0.471559	0.501718	0.61562	0.792792	0.452431
NM_001033475.3	Tmed8	transmembrane p24 trafficking protein 8 (Tmed8). mRNA	0.739219	1.03176	0.945151	1.56734	0.569658	0.105673	10.3813	0.211091	0.14538	0.154075	1.41051	0.720733	0.687595	1.02233	0.508547	0	0.0869248	0.0547452	0.185269	0
NM_001033477.3	Gm1322	predicted gene 1322 (Gm1322). mRNA	0	0	0	0	0	0	0	0	0	0	0	0	0	0	0	0	0	0	0	0
NM_001033478.2	Fam47e	family with sequence similarity 47. member E (Fam47e). transcript variant 1. mRNA	0	0	0	0	0	0	0	0	0	0	0	0	0	0	0	0	0	0	0	0
NM_001033479.5	Gm1527	predicted gene 1527 (Gm1527). mRNA	0	0	0	0	0	0	0	0	0	0	0	0	0	0	0	0	0	0	0	0
NM_001033481.1	Myrf	myelin regulatory factor (Myrf). mRNA	0	0	0	0	0	0	0	0	0	0	0.003918	0	0	0	0	0	0	0	0	0
NM_001033484.1	Iqgap3	IQ motif containing GTPase activating protein 3 (Iqgap3). mRNA	0.0215998	0.013523	0.0436867	0.0551839	0.029373	0.0458247	0.496301	0.0294608	0.0721756	0.032479	0.0135593	0.0142993	0.0152574	0.0325977	0.0416317	0.0414634	0.0219885	0.0259657	0.058582	0.0451805
NM_001033488.2	Mfsd2b	major facilitator superfamily domain containing 2B (Mfsd2b). mRNA	3.54491	3.88899	3.80875	10.0617	6.65316	3.46801	9.11068	3.47147	4.7069	5.24684	10.7202	8.65522	3.39129	6.56221	5.19107	4.11813	2.46818	3.49627	3.24531	5.43849
NM_001033489.2	Rnf207	ring finger protein 207 (Rnf207). mRNA	0	0	0	0	0	0	0	0	0	0	0	0	0	0	0	0	0	0	0	0
NM_001033490.1	Pusl1	pseudouridylate synthase-like 1 (Pusl1). mRNA	0	0.0208181	0	0	0	0	0	0	0	0	0	0	0.158545	0	0	0	0	0	0	0
NM_001033492.2	Mageb4	MAGE family member B4 (Mageb4). mRNA	0	0	0	0	0	0	0	0	0	0	0	0	0	0	0	0	0	0	0	0
NM_001033493.2	Adgrf2	adhesion G protein-coupled receptor F2 (Adgrf2). mRNA	0	0	0	0	0	0	0	0	0	0	0	0	0	0	0	0	0	0.005986	0	0
NM_001033496.3	Zfp213	zinc finger protein 213 (Zfp213). mRNA	0.136933	0.338155	0.209813	0.242197	0.0584193	0.0645572	3.6147	0.0466919	0.188834	0.137268	0.266065	0.264399	0.21763	0.390347	0.158355	0.0836369	0.0929312	0.0512121	0.132047	0.00868
NM_001033498.2	Gramd2	GRAM domain containing 2 (Gramd2). transcript variant 2. mRNA	0	0	0	0	0	0	0.759511	0	0	0	0	0	0	0	0	0	0	0	0.0116151	0
NM_001033499.1	Sh2d1b2	SH2 domain containing 1B2 (Sh2d1b2). mRNA	0	0	0	0	0	0.108647	0	0.052387	0.146677	0	0	0	0	0	0.0296117	0	0	0.0492501	0.0277787	0
NM_001033500.3	Wdr72	WD repeat domain 72 (Wdr72). mRNA	0	0	0	0	0	0	0	0	0	0	0	0	0	0	0	0	0	0	0	0
NM_001033525.3	Kcnk6	potassium inwardly-rectifying channel. subfamily K. member 6 (Kcnk6). mRNA	0.154198	0.309729	0.0854503	0.250428	0.155897	0.0371058	2.06008	0.0536746	0.0739483	0.0928212	0.239306	0.297737	0.113837	0.256413	0.2196	0.028778	0.0732541	0.062475	0.0271062	0.0627157
NM_001033528.1	Usp36	ubiquitin specific peptidase 36 (Usp36). mRNA	0.006245	0	0	0	0.0174846	0	0	0	0	0.106334	0.245022	0.387076	0	0	0	0	0	0	0	0.0748149
NM_001033530.3	AW146154	expressed sequence AW146154 (AW146154). mRNA	0.0770201	0.202524	0.152	0.264887	0.0546279	0	1.9564	0.0306397	0.0314553	0	0.103145	0.0773321	0.12377	0.10246	0.0796677	0	0.007318	0.005761	0.006499	0.006835
NM_001033531.4	Klhl32	kelch-like 32 (Klhl32). transcript variant 2. mRNA	0	0	0	0	0	0	0	0	0	0	0	0	0	0	0	0	0	0	0	0
NM_001033532.3	AW554918	expressed sequence AW554918 (AW554918). mRNA	0.0586528	0.123762	0.0922663	0.0649981	0.0164213	0	2.18288	0.0466658	0.054441	0.0161402	0.071593	0.105701	0.124866	0.133868	0	0	0.0371517	0	0.0123725	0
NM_001033533.3	Ccdc102a	coiled-coil domain containing 102A (Ccdc102a). mRNA	0.182046	0.44323	0.229426	0.459135	0.165647	0.009387	2.30973	0.0814732	0.0675895	0.0375718	0.171419	0.175754	0.140647	0.15136	0.122807	0.0648618	0.0432418	0.0340421	0.0240011	0
NM_001033534.1	Layn	layilin (Layn). mRNA	0.220646	0.0859535	0.0567976	0.384481	0.323976	0.200246	0	0.128738	0.425987	0.273229	0.775658	0.170415	0.157588	0.103597	0.132308	0.161721	0.195665	0.16504	0.0248236	0.352438
NM_001033535.3	Tnfaip8l3	tumor necrosis factor. alpha-induced protein 8-like 3 (Tnfaip8l3). mRNA	0	0	0	0	0	0	0	0	0.026303	0	0	0	0.00973	0	0.0106203	0.0192316	0	0	0.009963	0.0104778
NM_001033536.1	Rfx7	regulatory factor X. 7 (Rfx7). mRNA	0.292271	1.29367	0.776301	0.876424	0.19982	0.0379314	14.7824	0.120189	0.0731551	0.0691316	0.816352	0.408351	0.673862	0.534516	0.197902	0.013372	0.129487	0.009825	0.0734296	0.0247702
NM_001033537.2	Pgap3	post-GPI attachment to proteins 3 (Pgap3). mRNA	0	0.306097	0.102296	0.198797	0.137559	0	1.24111	0.155216	0.0402393	0	0.208644	0.175786	0.281345	0.250194	0.107233	0	0	0	0	0
NM_001033539.2	Bex6	brain expressed family member 6 (Bex6). mRNA	0.0534518	0.026028	0.0687965	0.0245108	0	0	0	0	0	0	0.0223696	0	0	0.0418277	0	0	0	0	0	0
NM_001033541.2	Gm5127	predicted gene 5127 (Gm5127). mRNA	0.0193636	0.007072	0.0436142	0.013319	0	0.005991	0.54427	0.0231093	0.0107839	0	0.0303887	0	0	0	0.0261251	0	0.0137984	0.0108628	0	0
NM_001033542.2	Slc47a2	solute carrier family 47. member 2 (Slc47a2). mRNA	0	0	0	0	0	0	0	0	0	0	0	0	0	0	0	0	0	0	0	0
NM_001033543.3	Il20rb	interleukin 20 receptor beta (Il20rb). mRNA	0.007065	0.0258022	0	0.0437368	0.0395609	0.0349739	2.08514	0.0758861	0.0236079	0.0174977	0	0.0409253	0.0480339	0.008293	0.0285964	0.0172611	0.0553801	0	0.0357684	0.009404
NM_001033547.2	Ccdc185	coiled-coil domain containing 185 (Ccdc185). mRNA	0	0	0	0	0	0	0	0	0	0	0	0	0	0	0	0	0	0	0	0
NM_001033548.3	Dnaaf3	dynein. axonemal assembly factor 3 (Dnaaf3). mRNA	0	0	0	0	0	0	0	0	0	0	0	0	0	0	0	0	0	0	0	0
NM_001033550.3	Lrrc8b	leucine rich repeat containing 8 family. member B (Lrrc8b). mRNA	0	0	0.003349	1.1562	0.584261	0.283377	3.32372	0.447177	0	0	0.908189	0.520005	0.400453	0	0.451118	0	0	0	0.327687	0
NM_001033573.2	Zdhhc6	zinc finger. DHHC domain containing 6 (Zdhhc6). transcript variant 1. mRNA	0.0848779	0	0.0664965	0.29445	0.0743904	0	0.795246	0	0.147975	0	0	0	0	0.324878	0	0	0.0631133	0	0	0
NM_001033597.1	Acsl6	acyl-CoA synthetase long-chain family member 6 (Acsl6). transcript variant 2. mRNA	0	0	0.0260907	0	0	0	0	0	0	0	0	0	0	0	0	0	0	0	0	0
NM_001033598.1	Acsl6	acyl-CoA synthetase long-chain family member 6 (Acsl6). transcript variant 3. mRNA	0	0	0	0.0376324	0	0.008464	0.0213585	0	0.0380867	0	0	0	0	0	0	0.008354	0	0	0	0.004552
NM_001033599.1	Acsl6	acyl-CoA synthetase long-chain family member 6 (Acsl6). transcript variant 4. mRNA	0	0	0	0.0174154	0	0	0	0.007554	0	0	0	0	0	0	0	0	0	0	0	0
NM_001033600.1	Acsl4	acyl-CoA synthetase long-chain family member 4 (Acsl4). transcript variant 3. mRNA	0.0860441	0.302696	0.0904044	0.128032	0	0.0717143	1.90301	0.094306	0.115397	0	0.218261	0.185127	0	0.115427	0.210857	0	0.115121	0.114272	0	0.0490852
NM_001033606.2	Acsl3	acyl-CoA synthetase long-chain family member 3 (Acsl3). transcript variant 2. mRNA	0.0965359	0.0470074	0.218915	0.208689	0	0.085335	1.06958	0.0603482	0.0563224	0.0512323	0.0634861	0	0.107967	0.0215835	0	0	0.0393092	0.0361038	0	0
NM_001033621.4	Myot	myotilin (Myot). mRNA	0	0	0	0	0	0	0	0	0	0	0	0	0	0	0	0	0	0	0	0
NM_001033630.1	2310061I04Rik	RIKEN cDNA 2310061I04 gene (2310061I04Rik). mRNA	0.524592	0.858299	0	0.72167	0.469991	0	7.84224	0.0667808	0.155815	0.0866148	0.535681	0.70499	0.726284	0.205255	0.349167	0	0.239246	0	0.159351	0
NM_001033632.1	Ifitm6	interferon induced transmembrane protein 6 (Ifitm6). mRNA	5.53597	7.40135	4.5418	7.21488	6.70729	6.91119	62.4844	16.4978	17.1462	8.55908	6.19846	6.01971	4.10193	3.66705	5.04488	1.85873	3.25282	11.2965	6.28965	2.73639
NM_001033633.3	Slc2a13	solute carrier family 2 (facilitated glucose transporter). member 13 (Slc2a13). mRNA	0	0	0	0	0	0	0	0	0	0	0	0	0	0	0	0	0	0	0	0
NM_001033634.3	Zyg11b	zyg-ll family member B. cell cycle regulator (Zyg11b). mRNA	0.307414	0.698834	0.427403	0.677323	0.406867	0.0793438	15.8568	0.327642	0.185852	0.0671781	0.670782	0.542788	0.433857	0.531613	0.26061	0.100409	0.0784873	0.0830004	0.119638	0.0547051
NM_001033636.4	Prex2	phosphatidylinositol-3.4.5-trisphosphate-dependent Rac exchange factor 2 (Prex2). transcript variant 2. mRNA	0.005356	0	0	0.007368	0.0015	0	0.167276	0.003196	0	0.009949	0.006725	0.006205	0.00331	0	0	0.003271	0	0	0	0
NM_001033638.2	Crxos	cone-rod homeobox. opposite strand (Crxos). transcript variant 1. mRNA	0	0	0	0	0	0	0	0	0	0	0	0	0	0	0	0	0	0	0	0
NM_001033654.2	Pus10	pseudouridylate synthase 10 (Pus10). transcript variant 2. mRNA	0	0	0	0	0.0123477	0	0	0	0	0	0	0	0.115849	0.132655	0	0	0.0942826	0.0865947	0.006977	0
NM_001033668.1	Dnah1	dynein. axonemal. heavy chain 1 (Dnah1). mRNA	0.001361	0.009938	0.0122589	0	0	0	0.146606	0	0	0	0	0.0007882	0.001682	0.002396	0	0	0	0	0	0.003622
NM_001033669.2	Fbxw10	F-box and WD-40 domain protein 10 (Fbxw10). transcript variant 2. mRNA	0	0.137051	0	0.0331875	0	0	0	0	0	0	0	0.121111	0	0.129001	0	0	0	0	0.006785	0
NM_001033711.1	Evi2a	ecotropic viral integration site 2a (Evi2a). transcript variant 1. mRNA	0.374336	0.480556	0.525598	0.46815	0.385341	0.0374354	1.85401	0.108303	0.219002	0.0468228	0.303824	0.446817	0.327183	0.248546	0.249973	0.0184759	0.0107778	0.0339392	0.0382857	0.0402645
NM_001033713.2	Mef2a	myocyte enhancer factor 2A (Mef2a). transcript variant 1. mRNA	0.0709786	0	0.0243613	0	0	0	0	0.0282363	0	0	0	0	0	0	0	0	0	0	0	0
NM_001033759.2	Cemip2	cell migration inducing hyaluronidase 2 (Cemip2). transcript variant 2. mRNA	0.169323	0.430934	0.325195	0.303906	0.362953	0.271757	3.51991	0.333112	1.58098	0.265371	0.250784	0.268193	0.299244	0.251544	0.0999462	0.284406	0.239433	0.280514	0.373364	0.232427
NM_001033764.3	4931408C20Rik	RIKEN cDNA 4931408C20 gene (4931408C20Rik). mRNA	0.539868	0.221532	0.161351	0.520158	0.0452881	0	0.0252593	0	0	0	0.568645	0.45913	0.164963	0.223099	0.0491044	0	0	0	0	0.0107657
NM_001033765.2	1700071K01Rik	RIKEN cDNA 1700071K01 gene (1700071K01Rik). mRNA	0.008437	0.0123244	0.0217171	0.0812423	0.009448	0.052204	0.368876	0	0.0187939	0.0417887	0	0.0684178	0.0312864	0.0198057	0	0	0	0	0	0
NM_001033766.3	4930596D02Rik	RIKEN cDNA 4930596D02 gene (4930596D02Rik). mRNA	0	0	0	0	0	0	0	0	0	0	0	0	0	0	0	0	0	0	0	0
NM_001033767.3	Gm4951	predicted gene 4951 (Gm4951). mRNA	0	0	0.0170259	0.0227475	0.007407	0.147338	0.309851	0.0118405	0.213645	0.225238	0	0.0421447	0	0.007764	0	0	0.0659854	0	0.0334856	0.0352162
NM_001033768.2	Pin1rt1	protein (peptidyl-prolyl cis/trans isomerase) NIMA-interacting 1. retrogene 1 (Pin1rt1). mRNA	0	0	0	0	0	0	0	0	0	0	0	0	0	0	0	0	0	0	0	0
NM_001033769.2	B020031M17Rik	RIKEN cDNA B020031M17 gene (B020031M17Rik). mRNA	0	0	0	0	0	0	0	0	0	0	0	0	0	0.0889007	0	0	0	0	0	0
NM_001033770.2	Gm904	predicted gene 904 (Gm904). mRNA	0	0	0	0	0	0	0	0	0	0	0	0	0	0	0	0	0	0	0	0
NM_001033773.4	Ube2u	ubiquitin-conjugating enzyme E2U (putative) (Ube2u). mRNA	0	0.008433	0.00743	0.0158828	0	0	0.306488	0.006889	0	0	0.0144952	0	0.0142717	0.006776	0	0	0	0	0	0
NM_001033775.3	Trim80	tripartite motif-containing 80 (Trim80). mRNA	0	0	0	0	0	0	0.0424682	0	0	0	0	0	0	0	0	0	0	0	0	0
NM_001033776.2	Vrtn	vertebrae development associated (Vrtn). transcript variant 3. mRNA	0	0	0	0	0	0	0	0	0	0	0	0	0	0	0	0	0	0	0	0
NM_001033779.2	Gm5544	predicted gene 5544 (Gm5544). mRNA	0	0	0	0.0270417	0	0	0.245563	0	0	0	0	0	0	0.0230733	0	0	0	0	0	0
NM_001033780.3	I830077J02Rik	RIKEN cDNA I830077J02 gene (I830077J02Rik). mRNA	4.53468	4.10424	5.27609	6.50949	4.23197	2.86697	9.31321	2.62751	3.56854	3.03148	12.4076	5.74841	1.82788	3.16281	3.46915	1.85652	1.25275	1.69594	1.89234	2.76652
NM_001033782.3	Gm5592	predicted gene 5592 (Gm5592). mRNA	0	0	0	0	0	0	0	0	0	0	0	0	0	0	0	0	0	0	0	0
NM_001033783.2	Pate9	prostate and testis expressed 9 (Pate9). mRNA	0.0149568	0.0218493	0.0481262	0.0360075	0.004188	0.0231374	1.40134	0.004463	0.0124945	0.0231515	0.0187782	0.008664	0.027733	0.0175562	0.0201795	0.009135	0.0159872	0.0167812	0.0141978	0.004977
NM_001033785.2	Akap14	A kinase (PRKA) anchor protein 14 (Akap14). mRNA	0	0	0	0	0	0	0.320503	0.0116643	0	0	0	0	0.0362447	0	0	0	0	0	0	0
NM_001033786.2	Smim9	small integral membrane protein 9 (Smim9). mRNA	0	0	0	0	0	0	0	0	0	0	0	0	0	0	0	0	0	0	0	0
NM_001033789.2	Gm5820	predicted gene 5820 (Gm5820). mRNA	0	0	0	0	0	0	0.287627	0	0	0	0	0	0	0	0.0270121	0	0	0	0.005068	0
NM_001033790.3	Pramel17	PRAME like 17 (Pramel17). mRNA	0.008868	0.0129547	0.0114138	0.0182993	0	0	0.180022	0.005292	0	0.0109814	0.0445353	0	0.0164432	0.005205	0	0	0	0	0	0
NM_001033791.3	Gm12888	predicted gene 12888 (Gm12888). mRNA	0	0	0	0	0	0	0	0	0	0	0	0	0	0	0	0	0	0	0	0
NM_001033793.3	Ubtfl1	upstream binding transcription factor. RNA polymerase I-like 1 (Ubtfl1). transcript variant 1. mRNA	0	0	0	0	0	0	0	0	0	0	0	0	0	0	0	0	0	0	0	0
NM_001033794.3	Fbxw18	F-box and WD-40 domain protein 18 (Fbxw18). mRNA	0	0	0	0	0	0	0	0	0	0	0	0	0	0	0	0	0	0	0	0
NM_001033795.4	Rtl4	retrotransposon Gag like 4 (Rtl4). mRNA	0	0	0	0	0	0	0	0	0	0	0	0	0	0	0	0	0	0	0	0
NM_001033799.2	Cldn34b4	claudin 34B4 (Cldn34b4). transcript variant 1. mRNA	0	0	0	0	0	0	0	0	0	0	0	0	0	0	0	0	0	0	0	0
NM_001033805.3	Tmem253	transmembrane protein 253 (Tmem253). mRNA	0	0.010426	0	0	0.0159856	0	0	0.0170354	0.007949	0	0	0	0	0	0	0	0.0203434	0	0	0
NM_001033813.4	Zfp872	zinc finger protein 872 (Zfp872). mRNA	0	0.004322	0.007616	0	0.003313	0	0.535903	0.007062	0	0	0	0.006855	0	0.003473	0	0	0	0	0.007489	0
NM_001033814.2	4930432M17Rik	RIKEN cDNA 4930432M17 gene (4930432M17Rik). mRNA	0	0	0	0	0	0	0	0	0	0	0	0	0	0	0	0	0	0	0	0
NM_001033819.2	9130409I23Rik	RIKEN cDNA 9130409I23 gene (9130409I23Rik). mRNA	0	0.0202203	0.0118769	0	0	0.01142	0	0	0	0	0	0	0	0.005416	0	0.0112725	0	0	0.017519	0
NM_001033820.3	Zfp551	zinc fingr protein 551 (Zfp551). mRNA	0	0.016429	0.00965	0.0979856	0.0335861	0	0.140494	0.008948	0	0	0.0423595	0.0434305	0.0278042	0.0176013	0.0303469	0	0	0	0	0
NM_001033851.1	Cpne8	copine VIII (Cpne8). transcript variant 2. mRNA	0.731798	0.160355	0.7849	0.654367	1.18833	0.135847	12.4939	0.829692	0.13585	0.740062	2.20505	0.339121	0.6483	0.816032	0.608855	0.134092	0.260738	0.752642	0.632914	0.957852
NM_001033865.1	Rps27a	ribosomal protein S27A (Rps27a). transcript variant 2. mRNA	0.597323	1.26213	1.38659	1.17389	0.633104	1.35964	9.32749	0.623762	1.08114	0.766092	0.749939	0.766155	1.23941	0.525852	0.431732	0.364838	2.08264	0.239352	0.48601	1.16424
NM_001033872.2	Smagp	small cell adhesion glycoprotein (Smagp). transcript variant 2. mRNA	0.153038	0.645847	0.218858	0.561417	0.25708	0.0315657	0.212424	0.142055	0.113639	0	0.213488	0.81754	0.189176	0.568846	0.252361	0.124632	0.363514	0.0953923	0	0.271609
NM_001033874.2	Ak8	adenylate kinase 8 (Ak8). mRNA	0.0386997	0	0	0.0608438	0	0	0	0.0395879	0	0	0	0	0.0410042	0.071383	0.0447541	0	0	0	0.0139946	0
NM_001033876.2	Kcnk9	potassium channel. subfamily K. member 9 (Kcnk9). mRNA	0	0	0.008713	0.001552	0	0	0	0	0	0	0	0	0	0	0	0	0	0	0	0
NM_001033877.4	Adamts17	a disintegrin-like and metallopeptidase (reprolysin type) with thrombospondin type 1 motif. 17 (Adamts17). mRNA	0	0	0	0	0	0	0	0	0	0	0	0	0	0	0	0	0	0	0	0
NM_001033878.3	Vmn2r66	vomeronasal 2. receptor 66 (Vmn2r66). mRNA	0	0	0	0	0	0	0	0	0	0	0	0	0	0	0	0	0	0	0	0
NM_001033879.3	Tubal3	tubulin. alpha-like 3 (Tubal3). mRNA	0.00561	0.004098	0.00361	0	0.006283	0.0138854	0.219007	0.0100428	0	0.0208408	0.0140867	0.009749	0	0	0.007569	0.0102795	0	0	0.00355	0
NM_001033880.3	4930415L06Rik	RIKEN cDNA 4930415L06 gene (4930415L06Rik). mRNA	0	0	0	0	0	0	0	0	0	0	0	0	0	0	0	0	0	0	0	0
NM_001033904.1	Khdc1c	KH domain containing 1C (Khdc1c). mRNA	0.009862	0.0288125	0.0126928	0	0.0110441	0	0.215593	0.0117694	0.0109842	0.0244238	0	0	0.0121904	0	0.0133053	0.0120468	0.0140548	0.0110646	0.0249633	0.0131268
NM_001033908.1	Med22	mediator complex subunit 22 (Med22). transcript variant 2. mRNA	0	0	0	0	0	0	0	0	0	0	0	0	0	0	0	0.0939069	0	0	0	0.0511627
NM_001033922.2	Treml4	triggering receptor expressed on myeloid cells-like 4 (Treml4). transcript variant 1. mRNA	0.652992	1.09441	0.429998	0.793853	0.0907019	0.100232	0.442652	0	0	0	1.22021	1.76518	0.187718	0.249552	0	0.0494685	0	0	0	0
NM_001033929.2	Thnsl2	threonine synthase-like 2 (bacterial) (Thnsl2). transcript variant 2. mRNA	0	0	0.0167559	0.0238792	0.00486	0	0.298162	0.010358	0	0	0	0.0100549	0.0643712	0	0.0351291	0.0212043	0.0247387	0	0	0.005776
NM_001033954.3	Calca	calcitonin/calcitonin-related polypeptide. alpha (Calca). transcript variant 2. mRNA	0	0	0	0	0	0	0.0802824	0	0	0	0	0	0	0	0	0	0	0	0	0
NM_001033960.1	Rabgap1	RAB GTPase activating protein 1 (Rabgap1). transcript variant 2. mRNA	0.0330616	0	0.0159573	0.022741	0	0	0.877664	0.004932	0	0	0	0	0	0	0	0	0	0	0	0
NM_001033962.2	Ube3a	ubiquitin protein ligase E3A (Ube3a). transcript variant 3. mRNA	0.0697706	0.993748	0.750829	0.882501	0.227896	0.0767515	2.76915	0.0763284	0.174853	0.0263994	0.394186	0.344653	0.395295	0.304837	0.0627557	0.0568201	0.0469561	0.0532748	0.10793	0.0464354
NM_001033966.4	Ak2	adenylate kinase 2 (Ak2). transcript variant 1. mRNA; nuclear gene for mitochondrial product	0	0	0.086171	0	0	0	0	0	0	0	0	0	0	0	0	0	0	0	0.0677903	0
NM_001033977.2	9230019H11Rik	RIKEN cDNA 9230019H11 gene (9230019H11Rik). mRNA	0	0.0365376	0.004024	0	0	0	0.136699	0	0	0	0.015701	0.003622	0.0231884	0.00734	0.004218	0	0	0	0.007914	0
NM_001033978.3	H2-Eb2	histocompatibility 2. class II antigen E beta2 (H2-Eb2). mRNA	0.261679	0.435256	0.290116	0.648688	0.0841441	0.025651	4.37755	0.086578	0.0606019	0.0128333	0.217941	0.279148	0.0896754	0.197676	0.160797	0	0.02954	0.0203485	0.0131168	0
NM_001033979.2	Ldlrad2	low density lipoprotein receptor class A domain containing 2 (Ldlrad2). mRNA	0.009581	0.0419893	0.0308292	0.0527224	0.0268248	0.0118573	1.72057	0.0285864	0.0320154	0.0296613	0.006015	0.0221999	0	0.0281158	0	0	0.0341375	0	0	0
NM_001033980.2	Cibar2	CBY1 interacting BAR domain containing 2 (Cibar2). mRNA	0	0	0	0	0	0	0	0	0	0	0	0	0	0	0	0	0	0	0	0
NM_001033981.3	Hbq1b	hemoglobin. theta 1B (Hbq1b). mRNA	39.0327	23.2937	27.0478	27.2186	27.5334	21.4867	21.4262	35.7828	35.4561	23.3556	27.7365	47.7429	41.144	35.0013	28.8427	25.2565	24.5609	39.538	34.3625	25.7909
NM_001033983.3	7420426K07Rik	RIKEN cDNA 7420426K07 gene (7420426K07Rik). mRNA	0	0	0	0	0	0	0	0	0	0	0	0	0	0	0	0	0	0	0	0
NM_001033988.2	Ncoa4	nuclear receptor coactivator 4 (Ncoa4). transcript variant 2. mRNA	0	0.0885968	0	0	0	0	0	0	0	0	0	0	0	0	0	0	0	0	0	0
NM_001034013.2	Asic2	acid-sensing (proton-gated) ion channel 2 (Asic2). transcript variant MDEG1. mRNA	0	0	0	0	0	0	0	0	0	0	0	0	0	0	0	0	0	0	0	0
NM_001034029.2	Il17re	interleukin 17 receptor E (Il17re). transcript variant 2. mRNA	0	0	0	0	0	0	0	0	0	0	0	0	0	0	0	0	0	0	0	0
NM_001034030.2	Limk2	LIM motif-containing protein kinase 2 (Limk2). transcript variant 3. mRNA	0.0718907	0	0	0	0	0	1.48746	0	0	0	0	0.0442461	0	0	0	0	0	0	0	0
NM_001034031.2	Il17re	interleukin 17 receptor E (Il17re). transcript variant 3. mRNA	0	0	0	0	0	0	0	0	0	0	0	0	0	0	0	0	0	0	0	0
NM_001034037.1	1700024G13Rik	RIKEN cDNA 1700024G13 gene (1700024G13Rik). mRNA	0	0	0	0	0	0	0	0	0	0	0	0	0	0	0	0	0	0	0	0
NM_001034059.1	Ccdc160	coiled-coil domain containing 160 (Ccdc160). mRNA	0	0	0.014676	0	0	0	0	0.006804	0	0	0.0143159	0	0	0	0	0	0	0	0	0
NM_001034060.3	Rufy4	RUN and FYVE domain containing 4 (Rufy4). transcript variant 2. mRNA	0.0683562	0	0	0	0	0	0	0.0226609	0	0	0	0.0615938	0.0328602	0	0.081978	0	0	0	0	0
NM_001034085.2	Ppp2r1b	protein phosphatase 2. regulatory subunit A. beta (Ppp2r1b). transcript variant 1. mRNA	0	0	0	0	0	0	0	0	0	0	0	0	0	0	0	0	0	0	0	0
NM_001034097.2	Tnfsfm13	tumor necrosis factor (ligand) superfamily. membrane-bound member 13 (Tnfsfm13). transcript variant 1. mRNA	0.0509366	0.0457906	0	0.086243	0	0.0193961	0	0	0	0	0.152498	0	0.106556	0	0	0	0	0.008792	0.0793465	0
NM_001034100.1	H2al1n	H2A histone family member L1N (H2al1n). mRNA	0	0	0	0	0	0	0	0	0	0	0	0	0	0	0	0	0	0	0	0
NM_001034101.2	Pramel31	PRAME like 31 (Pramel31). mRNA	0	0	0	0	0	0	0	0	0	0	0	0	0	0	0	0	0	0	0	0
NM_001034102.3	Gm5800	predicted gene 5800 (Gm5800). mRNA	0	0	0	0	0	0	0	0	0	0	0	0	0	0	0	0	0	0	0	0
NM_001034115.1	Shank1	SH3 and multiple ankyrin repeat domains 1 (Shank1). mRNA	0	0	0	0	0	0	0	0.0137588	0	0	0	0	0	0	0	0	0	0	0	0
NM_001034168.1	Ank2	ankyrin 2. brain (Ank2). transcript variant 3. mRNA	0	0	0	0	0	0	0	0	0	0	0	0	0	0	0	0	0	0	0	0
NM_001034851.2	Retreg1	reticulophagy regulator 1 (Retreg1). transcript variant 1. mRNA	1.04339	2.00511	1.21724	1.2972	1.44342	0	6.1861	0.569339	0.273448	0	1.80384	1.1603	1.41392	1.4736	0.643637	0.153358	0.071568	0.0845129	0.0953362	0
NM_001034856.2	Btg1c	BTG anti-proliferation factor 1C (Btg1c). mRNA	0	0	0	0	0	0	0	0	0	0	0	0	0.009066	0	0	0	0	0	0	0
NM_001034858.3	Armc2	armadillo repeat containing 2 (Armc2). mRNA	0.0108002	0.007889	0	0	0.0342696	0	0.0505953	0	0	0	0	0	0	0.0274674	0	0	0	0	0	0
NM_001034859.3	Gm4841	predicted gene 4841 (Gm4841). mRNA	0.0863993	0.207352	0.0834019	0.152817	0.148593	0.232942	3.81622	0.0920649	0.848922	0.343895	0.18983	0.175167	0.122059	0.155745	0.0291422	0.056541	0.259464	0.0761659	0.160124	0.242332
NM_001034860.2	Tdpoz8	TD and POZ domain containing 8 (Tdpoz8). transcript variant 2. mRNA	0	0	0	0	0	0	0	0	0	0	0	0	0	0	0	0	0	0	0	0
NM_001034862.2	Erich1	glutamate rich 1 (Erich1). mRNA	0.305032	0.550922	0.185592	0.480662	0.25465	0.0343177	4.81518	0.211804	0.148256	0	0.348152	0.308409	0.356495	0.351535	0.149653	0.0406494	0.0948498	0.0248902	0.105292	0.0369112
NM_001034863.3	Tlcd5	TLC domain containing 5 (Tlcd5). transcript variant 1. mRNA	0	0.0402058	0.086949	0.0688404	0	0.0123858	0.0312566	0	0.005574	0	0.0565439	0.0318855	0	0.029369	0.0303816	0	0	0	0.003167	0
NM_001034864.3	Tesl1	testin LIM domain protein like 1 (Tesl1). mRNA	0.0133697	0.0195309	0	0	0.0299455	0	0	0.015956	0.007446	0	0	0	0.0247903	0.0156934	0	0	0	0.0150006	0.008461	0.0266944
NM_001034866.1	Pnldc1	poly(A)-specific ribonuclease (PARN)-like domain containing 1 (Pnldc1). mRNA	0	0	0	0.0142653	0	0	0	0	0.01155	0	0	0	0.0128183	0	0	0	0	0	0	0
NM_001034867.2	Pm20d2	peptidase M20 domain containing 2 (Pm20d2). mRNA	0	0	0.004041	0.004319	0.0105491	0	0.009806	0	0	0	0	0	0	0	0	0.0115069	0	0	0.003974	0
NM_001034868.3	Mrgprx2	MAS-related GPR. member X2 (Mrgprx2). mRNA	0	0	0	0	0	0	0.005999	0	0.0171161	0.007136	0	0	0	0	0	0.002346	0	0	0	0.005114
NM_001034869.2	Gm4981	predicted gene 4981 (Gm4981). mRNA	0	0	0	0	0	0	0	0	0	0	0	0	0	0	0	0	0	0	0	0
NM_001034871.2	Clpsl2	colipase-like 2 (Clpsl2). mRNA	0	0	0	0	0	0	0	0	0	0	0	0	0	0	0	0	0	0	0	0
NM_001034872.2	Ldc1	leucine decarboxylase 1 (Ldc1). mRNA	0	0	0	0	0	0	0	0	0	0	0	0	0	0	0	0	0	0	0	0
NM_001034874.3	Shisa6	shisa family member 6 (Shisa6). mRNA	0	0	0.003011	0	0	0	0.0146118	0	0	0	0.005874	0	0	0	0	0	0	0	0	0
NM_001034875.3	Bpifb4	BPI fold containing family B. member 4 (Bpifb4). mRNA	0	0	0	0	0	0	0	0.004941	0	0	0.0103968	0	0	0	0	0	0	0	0	0
NM_001034876.1	Ccdc24	coiled-coil domain containing 24 (Ccdc24). mRNA	0	0	0	0	0	0	0	0	0	0	0	0	0	0	0	0	0	0	0	0
NM_001034878.3	Dnaic2	dynein. axonemal. intermediate chain 2 (Dnaic2). mRNA	0	0	0	0	0	0	0	0	0	0	0	0	0	0	0	0	0	0	0	0
NM_001034880.2	Gm5460	predicted gene 5460 (Gm5460). mRNA	0.0644249	0.107559	0.0473827	0.0949585	0.0360746	0.0227799	5.77747	0.0768875	0.0205024	0	0.0519978	0.021325	0.0284422	0.0270077	0.0434606	0.0562142	0.0327921	0.005163	0.0582434	0.0122507
NM_001034882.3	Kbtbd6	kelch repeat and BTB (POZ) domain containing 6 (Kbtbd6). mRNA	0.005873	0.0386099	0.0151189	0.0282795	0.0197327	0	1.43993	0.0105143	0.0327096	0.0509116	0.040557	0.006804	0.0181507	0.0310236	0.0198107	0	0	0.009885	0.007434	0.007818
NM_001034885.3	Pnpla1	patatin-like phospholipase domain containing 1 (Pnpla1). mRNA	0.0136739	0.0342433	0.025142	0.0161237	0.0109381	0	2.38538	0.319388	0.0152304	0.0120948	0.0171676	0.009052	0.0289764	0.0435654	0.0316263	0	0	0.008767	0.00989	0
NM_001034893.2	Zfp936	zinc finger protein 936 (Zfp936). mRNA	0	0	0.003624	0	0	0	0	0	0	0	0	0	0	0	0	0	0	0	0	0
NM_001034894.3	Foxr2	forkhead box R2 (Foxr2). mRNA	0	0	0	0	0	0	0	0	0	0	0	0	0	0	0	0	0	0	0	0
NM_001034895.3	Zfr2	zinc finger RNA binding protein 2 (Zfr2). mRNA	0.0286864	0.0647637	0.0335651	0.0466385	0	0	1.33571	0	0.020333	0.0193761	0.0261933	0.0574039	0.0322367	0.0244887	0.0175924	0	0	0	0	0.006943
NM_001034896.2	Tmem92	transmembrane protein 92 (Tmem92). transcript variant 2. mRNA	0	0	0	0	0	0	0	0	0	0	0	0	0	0	0	0	0	0	0	0
NM_001034898.2	Ms4a15	membrane-spanning 4-domains. subfamily A. member 15 (Ms4a15). mRNA	0	0.0149361	0.00658	0.0140655	0	0	0	0.0122022	0.0113882	0	0	0	0	0.0240027	0	0.0374696	0	0	0.0129407	0
NM_001034899.3	Catspere2	cation channel sperm associated auxiliary subunit epsilon 2 (Catspere2). transcript variant 1. mRNA	0	0	0	0	0	0	0	0	0	0	0	0	0	0	0	0	0	0	0	0
NM_001034900.3	Zfp345	zinc finger protein 345 (Zfp345). mRNA	0.0194173	0.0236377	0.0374872	0.0445198	0.003624	0.020025	0.454815	0.007724	0.003605	0.0160298	0.0121892	0.007498	0.008001	0	0.0261975	0.0276729	0	0.003631	0.008192	0
NM_001034903.3	Mansc4	MANSC domain containing 4 (Mansc4). mRNA	0.0623842	0.0227832	0.0401466	0.075093	0.017466	0	0.146124	0	0	0	0	0.0722734	0.0192789	0.0183066	0	0	0	0	0	0
NM_001034904.2	Gm5891	predicted gene 5891 (Gm5891). mRNA	0.0253684	0.0296471	0.0914231	0.0977167	0.05682	0.037674	0.50706	0.0363309	0.0169537	0.0125657	0.0573301	0.0470238	0.006272	0.0833766	0.0889895	0.0247916	0	0.0113852	0.0128432	0.0472746
NM_001034905.2	Spag11b	sperm associated antigen 11B (Spag11b). transcript variant 3. mRNA	0	0	0	0	0	0	0	0	0	0	0	0	0	0	0	0	0	0	0	0
NM_001034906.3	Trim43a	tripartite motif-containing 43A (Trim43a). transcript variant 2. mRNA	0	0	0	0	0	0	0.110169	0	0	0.00546	0	0	0	0	0	0	0	0	0	0
NM_001034907.3	Zc3h12b	zinc finger CCCH-type containing 12B (Zc3h12b). mRNA	0.0526809	0.132209	0.0678043	0.104062	0.0302549	0.0183886	4.23553	0.085441	0.004514	0	0.0746204	0.0532073	0.0384046	0.0983043	0.061964	0.0165009	0.0231016	0.0257646	0.0153869	0.0161822
NM_001034909.3	Gm6034	predicted gene 6034 (Gm6034). mRNA	0.278857	0.313356	0.151847	0.287713	0.132123	0.205734	11.8409	0.1472	0.842202	0.119532	0.148121	0.298211	0.12595	0.0125893	0.0795871	0.216179	0.336282	0.120336	0.30543	0.171315
NM_001034910.3	Defb42	defensin beta 42 (Defb42). mRNA	0	0	0	0	0	0	0	0	0	0	0	0	0	0	0	0	0	0	0	0
NM_001034962.1	Sorbs1	sorbin and SH3 domain containing 1 (Sorbs1). transcript variant 3. mRNA	0	0	0	0	0	0	0	0	0	0	0	0	0	0	0	0	0	0	0	0
NM_001034963.1	Sorbs1	sorbin and SH3 domain containing 1 (Sorbs1). transcript variant 4. mRNA	0	0	0	0	0	0	0	0	0.007345	0	0	0	0	0	0.0133453	0	0	0.007399	0	0
NM_001034964.1	Sorbs1	sorbin and SH3 domain containing 1 (Sorbs1). transcript variant 5. mRNA	0	0	0	0.0137028	0	0	0	0	0	0	0	0	0	0	0	0	0	0.003725	0	0
NM_001035122.2	Golm1	golgi membrane protein 1 (Golm1). transcript variant 2. mRNA	0.551479	0.823598	0.842882	1.28701	0.843684	0.0609364	11.0029	0.31145	0.312611	0.0792658	0.952024	1.20364	0.846044	0.760027	0.544749	0.234582	0.0842102	0.116015	0.130873	0.0393249
NM_001035123.4	Setd6	SET domain containing 6 (Setd6). transcript variant 1. mRNA	0.0523755	0.0535581	0.053929	0.0576415	0.0234621	0	0	0.0375043	0	0	0	0.0546103	0	0.0737738	0	0	0	0.0528879	0.0662902	0
NM_001035226.1	Xpo1	exportin 1 (Xpo1). transcript variant 2. mRNA	0	0.148632	0.121764	0	0	0	0.0111494	0.051127	0	0.256405	0.004482	0	0.253748	0	0	0	0	0.052071	0	0
NM_001035228.2	St3gal5	ST3 beta-galactoside alpha-2.3-sialyltransferase 5 (St3gal5). transcript variant 1. mRNA	21.5237	10.3609	5.6733	6.30576	11.5095	8.966	12.2164	7.64836	22.6941	9.13601	15.9449	7.03521	22.3941	27.4707	10.9399	16.9557	14.0623	7.22108	11.1035	22.2832
NM_001035231.3	Zfp748	zinc finger protein 748 (Zfp748). mRNA	0.273247	0.540538	0.356574	0.725696	0.216756	0.0563599	1.51711	0.0634092	0.135267	0.0751925	0.524122	0.373719	0.31666	0.380874	0.235533	0.041724	0.0378612	0.0447093	0.153707	0.0303096
NM_001035239.3	Trpm3	transient receptor potential cation channel. subfamily M. member 3 (Trpm3). transcript variant 1. mRNA	0	0	0	0	0	0	0	0	0	0	0	0	0	0	0	0	0	0	0	0
NM_001035240.3	Trpm3	transient receptor potential cation channel. subfamily M. member 3 (Trpm3). transcript variant 2. mRNA	0	0	0	0	0	0	0	0	0	0	0	0	0	0	0	0	0	0	0	0
NM_001035241.3	Trpm3	transient receptor potential cation channel. subfamily M. member 3 (Trpm3). transcript variant 3. mRNA	0	0	0	0	0	0	0	0	0	0	0	0	0	0	0	0	0	0	0	0
NM_001035242.2	Trpm3	transient receptor potential cation channel. subfamily M. member 3 (Trpm3). transcript variant 4. mRNA	0	0	0	0	0	0	0	0	0	0	0	0	0	0	0	0	0	0	0	0
NM_001035243.3	Trpm3	transient receptor potential cation channel. subfamily M. member 3 (Trpm3). transcript variant 5. mRNA	0	0	0	0	0	0	0	0	0	0	0	0	0	0	0	0	0	0	0	0
NM_001035244.2	Trpm3	transient receptor potential cation channel. subfamily M. member 3 (Trpm3). transcript variant 7. mRNA	0	0	0	0	0	0	0	0	0	0	0	0	0	0	0	0	0	0	0	0
NM_001035245.2	Trpm3	transient receptor potential cation channel. subfamily M. member 3 (Trpm3). transcript variant 8. mRNA	0	0	0	0	0	0	0	0	0	0	0	0	0	0	0	0	0	0	0	0
NM_001035246.2	Trpm3	transient receptor potential cation channel. subfamily M. member 3 (Trpm3). transcript variant 9. mRNA	0.002263	0.0529036	0	0.0186825	0.012674	0.005602	1.0674	0	0.002521	0	0.0142086	0.002622	0.0167874	0.013284	0	0	0	0	0.00573	0
NM_001035509.2	Zcchc18	zinc finger. CCHC domain containing 18 (Zcchc18). transcript variant 2. mRNA	0	0.046382	0.0536357	0.0491383	0.0444466	0	0.105357	0.009473	0.004421	0	0.029897	0.0252887	0	0.004659	0	0	0.008484	0	0.012558	0
NM_001035510.2	Zcchc18	zinc finger. CCHC domain containing 18 (Zcchc18). transcript variant 1. mRNA	0.0268955	0.0261932	0	0.009867	0	0	1.60155	0	0	0	0	0.004155	0	0	0	0	0	0	0.0136164	0
NM_001035525.1	AU040320	expressed sequence AU040320 (AU040320). transcript variant 2. mRNA	0	0.0692061	0.0701209	0.074948	0	0.0293144	1.12446	0	0	0	0.118957	0	0	0.0861925	0.0319585	0	0	0	0.0119921	0
NM_001035526.1	AU040320	expressed sequence AU040320 (AU040320). transcript variant 1. mRNA	0.0550911	0.006707	0.0177266	0.0126313	0.0925444	0	1.26174	0.213681	0.0460216	0	0.0288195	0.0265934	0.0227001	0	0	0	0	0	0	0.0458319
NM_001035532.2	Pakap	paralemmin A kinase anchor protein (Pakap). transcript variant 2. mRNA	0.0897515	0	0.0462068	0.0352769	0.040205	0	1.14924	0	0.002856	0	0.103024	0.0445624	0.0792467	0.106855	0.0484366	0.0250602	0.007309	0	0.196359	0.131414
NM_001035533.2	Pakap	paralemmin A kinase anchor protein (Pakap). transcript variant 1. mRNA	0	0	0	0	0	0	0	0	0.0386723	0	0	0	0	0	0	0	0.144783	0.0634828	0	0
NM_001035854.2	Ap2b1	adaptor-related protein complex 2. beta 1 subunit (Ap2b1). transcript variant 1. mRNA	0.742848	1.08044	0.51242	1.24233	0.703229	0.506727	6.78811	0.544676	0.50113	0.0581188	1.26588	0.708733	1.02029	1.33737	0.240188	0.294573	0.230653	0.268741	0.309304	0
NM_001036293.2	Nrbf2	nuclear receptor binding factor 2 (Nrbf2). mRNA	0.474817	1.00826	0.686728	0.693599	0.597528	0.31501	2.56832	0.163574	0.436177	0.26671	1.09393	0.935711	0.59299	0.936557	0.686846	0.227226	0	0.230669	0.216842	0.221533
NM_001036684.3	Atp2b2	ATPase. Ca++ transporting. plasma membrane 2 (Atp2b2). transcript variant 2. mRNA	0	0	0	0	0	0	0	0	0	0	0	0	0	0	0	0	0	0	0	0
NM_001036740.2	B3gnt8	UDP-GlcNAc:betaGal beta-1.3-N-acetylglucosaminyltransferase 8 (B3gnt8). transcript variant 2. mRNA	0.427469	0.51171	0.106981	0.751411	0.186169	0	0.389383	0.0141711	0.0661289	0	0.275798	0.364546	0.344935	0.543575	0.208266	0	0	0.0133226	0.0150288	0
NM_001037098.1	Nacc2	nucleus accumbens associated 2. BEN and BTB (POZ) domain containing (Nacc2). transcript variant 2. mRNA	0	0	0.111191	0.228952	0	0.0817572	0.230128	0.0621644	0.0495271	0	0.0382811	0	0.0471134	0.198335	0	0.100876	0	0	0.0401992	0.0676429
NM_001037099.2	Cacnb4	calcium channel. voltage-dependent. beta 4 subunit (Cacnb4). transcript variant 1. mRNA	0	0	0.0520771	0	0	0	0	0	0	0	0	0	0	0	0	0	0	0	0	0
NM_001037127.2	Musk	muscle. skeletal. receptor tyrosine kinase (Musk). transcript variant 1. mRNA	0	0	0	0	0	0	0	0	0	0	0	0	0	0	0	0	0	0	0	0
NM_001037128.1	Musk	muscle. skeletal. receptor tyrosine kinase (Musk). transcript variant 2. mRNA	0	0	0	0	0	0	0	0	0	0	0	0	0	0	0	0	0	0	0	0
NM_001037129.1	Musk	muscle. skeletal. receptor tyrosine kinase (Musk). transcript variant 3. mRNA	0	0	0	0	0.005838	0	0	0	0	0	0	0	0	0	0	0	0	0	0	0
NM_001037130.1	Musk	muscle. skeletal. receptor tyrosine kinase (Musk). transcript variant 5. mRNA	0	0	0	0	0	0	0	0	0	0	0	0	0	0	0	0	0	0	0	0
NM_001037134.2	Ccne2	cyclin E2 (Ccne2). transcript variant 1. mRNA	0	0	0	0	0	0	0.166926	0	0	0	0	0.0130361	0	0	0	0	0	0	0	0
NM_001037136.1	Agap1	ArfGAP with GTPase domain. ankyrin repeat and PH domain 1 (Agap1). transcript variant 2. mRNA	0.0650608	0	0	0	0.135314	0	1.51523	0.0732094	0.118017	0.0667546	0	0	0	0	0	0	0.0423881	0	0.0494074	0.002474
NM_001037143.2	Pinlyp	phospholipase A2 inhibitor and LY6/PLAUR domain containing (Pinlyp). mRNA	0	0	0	0	0	0	0	0	0	0	0	0	0	0	0	0	0	0	0	0
NM_001037166.2	Gm4925	predicted gene 4925 (Gm4925). mRNA	0.0504899	0.0163904	0.0288819	0.0385877	0	0.0277708	0.578177	0.0200856	0.0624857	0	0.02113	0.0129986	0.0624125	0	0	0	0.0159906	0.0188829	0	0.007467
NM_001037167.1	Samt2	spermatogenesis associated multipass transmembrane protein 2 (Samt2). mRNA	0	0.0253071	0.0445941	0.047664	0.0097	0.0428785	0.324624	0.0103375	0.009648	0.0214524	0.02175	0.02007	0.0321219	0.0305019	0.0116865	0	0	0.0291555	0.0219262	0.0345892
NM_001037168.1	Psg27	pregnancy-specific glycoprotein 27 (Psg27). mRNA	0	0	0	0	0	0	0	0	0	0	0	0	0.005442	0	0	0	0	0	0	0
NM_001037170.2	Tomm40l	translocase of outer mitochondrial membrane 40-like (Tomm40l). mRNA; nuclear gene for mitochondrial product	0.392874	0.587064	0.277919	0.614731	0.174648	0.141037	13.3844	0.325705	0.297297	0.111413	0.451835	0.371765	0.415209	0.327384	0.218498	0.139215	0.290645	0.121135	0.185994	0
NM_001037177.2	Nfatc2	nuclear factor of activated T cells. cytoplasmic. calcineurin dependent 2 (Nfatc2). transcript variant 2. mRNA	0	0.0225887	0	0	0	0	0.0402436	0	0	0	0	0	0	0	0	0	0	0	0	0
NM_001037178.2	Nfatc2	nuclear factor of activated T cells. cytoplasmic. calcineurin dependent 2 (Nfatc2). transcript variant 3. mRNA	0	0	0	0	0	0	0	0	0	0	0	0	0	0	0	0	0	0	0	0
NM_001037221.2	Samd4	sterile alpha motif domain containing 4 (Samd4). transcript variant 1. mRNA	0	0	0	0	0	0	0	0	0	0	0	0	0	0	0	0	0	0	0	0
NM_001037247.4	Defb36	defensin beta 36 (Defb36). mRNA	0	0	0	0	0	0	0	0	0.0415064	0	0	0	0	0	0	0	0	0	0	0
NM_001037248.3	Gm4567	predicted gene 4567 (Gm4567). mRNA	0.005494	0.008026	0	0.007558	0	0.0135979	0.085789	0	0.0244768	0.006803	0.006898	0.006365	0	0.0128973	0	0	0	0	0.0486738	0.0146256
NM_001037279.2	Selenoh	selenoprotein H (Selenoh). transcript variant 2. mRNA	0.248709	0.956109	0.202173	0.360152	0.0879564	0.129597	2.69816	0.249954	0	0	0.328689	0.18198	0.291258	0.460948	0.317894	0	0	0	0.463893	0.243934
NM_001037294.1	Alpk2	alpha-kinase 2 (Alpk2). mRNA	0.004832	0.0388193	0.009328	0.003323	0.006764	0.00299	0.150894	0.015857	0.0215261	0.023932	0.024264	0.005597	0.002986	0.0113425	0.0228153	0.005902	0.0206576	0.008131	0.009173	0.006431
NM_001037298.1	Piezo1	piezo-type mechanosensitive ion channel component 1 (Piezo1). transcript variant 2. mRNA	0.040503	0	0	0	0	0	0.852177	0	0.0213696	0	0	0.0395146	0	0	0	0.0260408	0	0	0	0
NM_001037321.2	Fbxo40	F-box protein 40 (Fbxo40). transcript variant 2. mRNA	0	0	0	0	0	0	0.373191	0	0	0	0	0	0	0	0	0	0	0	0	0
NM_001037326.2	Cstf3	cleavage stimulation factor. 3' pre-RNA. subunit 3 (Cstf3). transcript variant 3. mRNA	0.180096	0.279533	0.144874	0.46454	0.163873	0	10.0188	0.134334	0	0	0.0565277	0.234726	0.13914	0.132123	0.0911188	0.0550003	0	0	0	0.0299655
NM_001037493.2	Slc41a3	solute carrier family 41. member 3 (Slc41a3). transcript variant 2. mRNA	0.516048	0.239864	0.105667	0.301177	0.100698	0.135469	2.83263	0.354594	0	0	0.981664	0.240047	0.294791	0.45889	0.300651	0	0	0.114045	0.0346366	0
NM_001037502.2	Defb28	defensin beta 28 (Defb28). mRNA	0	0	0	0	0	0	0	0	0	0	0	0	0	0	0	0	0	0	0	0
NM_001037539.2	Prok2	prokineticin 2 (Prok2). transcript variant 2. mRNA	0	0	0.0155464	0	0.0541084	1.13607	0	0	0.686144	0.53099	0.0454951	0	0.0149312	0	0.211856	0.0811539	0.705803	1.02997	0.489212	0.209014
NM_001037634.3	Oosp2	oocyte secreted protein 2 (Oosp2). mRNA	0	0	0	0	0	0	0	0	0	0	0.0326735	0.0301497	0	0	0	0	0	0	0	0
NM_001037665.2	Zfp1	zinc finger protein 1 (Zfp1). transcript variant 1. mRNA	0.267325	0.181792	0.183898	0.570651	0	0.171119	4.95171	0.143016	0.313155	0.125564	0.185173	0.603383	0	0.119022	0.0124369	0.146388	0	0.12411	0.390847	0.0368102
NM_001037707.1	Zfp27	zinc finger protein 27 (Zfp27). transcript variant 1. mRNA	0	0.137751	0	0.208238	0	0	0.891243	0.0533074	0	0	0	0.0718715	0.0245397	0	0.0334799	0.0303133	0	0.008353	0	0
NM_001037709.2	Rusc2	RUN and SH3 domain containing 2 (Rusc2). transcript variant 2. mRNA	0	0	0	0	0	0	0	0	0	0	0	0	0	0	0	0	0	0	0	0
NM_001037711.3	Cgn	cingulin (Cgn). transcript variant 1. mRNA	0	0	0	0	0	0	0	0	0	0	0	0	0	0	0	0	0	0	0	0
NM_001037712.2	Kcnh6	potassium voltage-gated channel. subfamily H (eag-related). member 6 (Kcnh6). mRNA	0	0	0	0	0	0	0	0	0	0	0	0	0	0	0	0	0	0	0	0
NM_001037713.4	Xaf1	XIAP associated factor 1 (Xaf1). transcript variant 1. mRNA	0.104493	0.246204	0.312365	0.310683	0.117021	0.392121	10.6745	0.160912	1.58437	0.571844	0.152351	0.316311	0.250002	0.201785	0	0.391173	0.77824	0.59376	0.729529	0.332019
NM_001037716.2	Gm10439	predicted gene 10439 (Gm10439). mRNA	0	0	0	0	0	0	0	0	0	0	0	0	0	0	0	0	0	0	0	0
NM_001037717.3	Slc38a6	solute carrier family 38. member 6 (Slc38a6). mRNA	0	0	0	0	0	0	0	0	0	0	0	0	0	0	0	0	0	0	0	0
NM_001037719.2	Btla	B and T lymphocyte associated (Btla). transcript variant 1. mRNA	1.38328	5.07755	2.1741	3.97721	1.15806	0.0837523	156.446	0.92397	0.265333	0	3.56179	1.96949	2.00775	3.94643	0.898457	0	0	0.21868	0.315209	0.108098
NM_001037722.3	Adam15	a disintegrin and metallopeptidase domain 15 (metargidin) (Adam15). transcript variant 1. mRNA	0.64868	1.36642	0.436087	0.912295	0.570786	0	2.32435	0.214277	0.0709617	0	0.403573	0.647506	0.429567	0.547269	0.246147	0	0.189851	0	0.073305	0.0154187
NM_001037723.3	Adcy7	adenylate cyclase 7 (Adcy7). transcript variant 2. mRNA	1.01318	1.98475	1.21997	2.14862	1.24032	0.174249	56.1044	1.10523	0.0711382	0	0.960414	1.74219	1.326	1.39032	0.893034	0.195049	0	0	0	0
NM_001037724.4	Adcy7	adenylate cyclase 7 (Adcy7). transcript variant 3. mRNA	2.23001	4.62716	2.07711	3.50776	1.47214	0	76.8115	0.243377	0.248385	0	3.63234	3.1648	2.34311	2.64341	1.35193	0	0	0	0.263677	0
NM_001037725.3	Fam117b	family with sequence similarity 117. member B (Fam117b). mRNA	0.686776	1.12578	0.997989	1.58044	0.533421	0.088126	7.67507	0.504241	0.278485	0.166562	1.42847	1.1238	0.670945	1.04575	0.582854	0.11985	0.0947213	0.0443865	0.14821	0.0505525
NM_001037726.1	Creb1	cAMP responsive element binding protein 1 (Creb1). transcript variant C. mRNA	0	0.0448759	0.0449919	0.0684907	0	0	0.248121	0	0	0.0104939	0	0	0.0157132	0	0	0	0	0	0	0
NM_001037727.2	Arhgap25	Rho GTPase activating protein 25 (Arhgap25). transcript variant 1. mRNA	0.357871	1.81764	1.24456	0	0.3185	0.09679	5.76598	0.48084	0.588673	0.217177	0.809348	0.771543	0.6914	0.475706	0.166274	0.173709	0.101331	0.0265911	0.560935	0
NM_001037736.2	Arhgef10	Rho guanine nucleotide exchange factor (GEF) 10 (Arhgef10). transcript variant 2. mRNA	0	0	0	0	0	0	0	0	0	0	0	0	0	0	0	0	0	0	0	0
NM_001037737.2	Arnt	aryl hydrocarbon receptor nuclear translocator (Arnt). transcript variant 1. mRNA	0.176346	0.66452	0.0980101	0.760868	0.325409	0	3.05414	0.0932716	0.263381	0	0.925864	0.805594	0.279917	0.251686	0.0324441	0.0244795	0.0656877	0.27655	0.0101453	0
NM_001037740.1	Strip2	striatin interacting protein 2 (Strip2). transcript variant 2. mRNA	0	0	0	0	0	0	0	0	0	0	0	0	0	0	0	0	0	0	0	0
NM_001037741.4	Gpx4	glutathione peroxidase 4 (Gpx4). transcript variant 2. mRNA	0	0	0.0441574	0.0707957	0.009605	0	3.75018	0.0818899	0.143301	0	0	0.009937	0.0318073	0	0.0231441	0	0	0	0	0
NM_001037742.2	Tyw5	tRNA-yW synthesizing protein 5 (Tyw5). transcript variant 1. mRNA	0	0	0.116759	0	0.0948204	0	0.566634	0	0	0	0	0.0420388	0	0	0.0652766	0	0.0603347	0	0	0
NM_001037744.1	Timm8a2	translocase of inner mitochondrial membrane 8A2 (Timm8a2). mRNA; nuclear gene for mitochondrial product	0	0	0	0	0	0	0.231286	0.0220956	0	0	0	0.0750715	0.022886	0.0217318	0	0	0	0	0	0
NM_001037745.2	Zfp791	zinc finger protein 791 (Zfp791). transcript variant 1. mRNA	0	0	0	0	0	0	0	0	0	0	0	0	0	0	0	0	0	0	0	0
NM_001037746.3	Prps1l3	phosphoribosyl pyrophosphate synthetase 1-like 3 (Prps1l3). mRNA	0.458606	1.22185	0.874148	1.18969	0.447558	0.302695	5.48355	0.354455	0.408647	0.324514	0.833509	0.925987	0.842252	0.840788	0.633476	0.0987057	0.26144	0.183767	0.33721	0.154064
NM_001037747.3	Card9	caspase recruitment domain family. member 9 (Card9). mRNA	1.58668	1.66148	1.20483	1.53888	3.72158	0	21.6779	0.458043	0.307582	0.0811429	1.62775	1.23089	0.59593	1.2636	1.04826	0	0	0.105028	0	0
NM_001037748.1	Gm20736	predicted gene. 20736 (Gm20736). mRNA	0.0366409	0.133815	0.106109	0.100812	0.0512926	0.034009	0.400516	0.0218644	0.0306088	0.0794029	0.0575033	0.0106123	0.0905866	0.0645135	0.0123589	0.0671395	0	0.0411105	0.0231877	0.0609653
NM_001037749.3	Slc22a14	solute carrier family 22 (organic cation transporter). member 14 (Slc22a14). mRNA	0	0	0	0	0	0	0	0	0	0	0	0	0	0	0	0	0	0	0	0
NM_001037751.3	Defb48	defensin beta 48 (Defb48). mRNA	0	0	0	0	0	0	0	0	0	0	0	0	0	0	0	0	0	0	0	0
NM_001037752.2	Defb45	defensin beta 45 (Defb45). mRNA	0	0	0	0	0	0	0	0	0	0	0	0	0	0	0	0	0	0	0	0
NM_001037754.3	Baiap2	brain-specific angiogenesis inhibitor 1-associated protein 2 (Baiap2). transcript variant 3. mRNA	0.0199936	0	0.102933	0	0.0895629	0	2.5512	0.0511311	0.0445389	0.007074	0.0466178	0	0	0	0	0	0	0.0320463	0	0
NM_001037755.3	Baiap2	brain-specific angiogenesis inhibitor 1-associated protein 2 (Baiap2). transcript variant 1. mRNA	0	0.171962	0.0757544	0.0462682	0.0941636	0.0468257	2.17956	0	0	0.0416483	0.263914	0	0	0.0986956	0	0.0308139	0.0359501	0	0.0585314	0.0447684
NM_001037756.3	Brms1l	breast cancer metastasis-suppressor 1-like (Brms1l). transcript variant 1. mRNA	0.260148	0.42445	0.326133	0.422949	0.158912	0.0794419	7.31221	0.15322	0	0.117144	0.517495	0.0821963	0.271463	0.325189	0.177773	0	0	0	0	0
NM_001037757.1	Washc1	WASH complex subunit 1 (Washc1). transcript variant 2. mRNA	0.0909995	0.412097	0.0585616	0	0	0	0.132627	0	0	0	0.007617	0.007028	0	0.149541	0	0	0.103753	0	0	0.0161504
NM_001037758.2	Btrc	beta-transducin repeat containing protein (Btrc). transcript variant 1. mRNA	0	0.004024	0	0	0	0	0	0	0	0	0	0	0	0	0	0	0	0	0	0
NM_001037759.1	Sgk3	serum/glucocorticoid regulated kinase 3 (Sgk3). transcript variant 3. mRNA	0	0	0.104401	0.0513306	0	0.0441693	9.04896	0.0813172	0	0	0	0	0	0.112351	0.0525309	0	0	0	0.277196	0
NM_001037761.2	Capzb	capping protein (actin filament) muscle Z-line. beta (Capzb). transcript variant 1. mRNA	0.186011	0.0858093	0.938739	0	0.197349	0	9.5089	0.005842	0	0	0.141351	0	0	0.0287287	0	0	0	0.0768897	0.0991277	0
NM_001037762.1	Zdhhc12	zinc finger. DHHC domain containing 12 (Zdhhc12). transcript variant 2. mRNA	0.0988224	0.59966	0.215248	0.669282	0.306473	0.0940759	8.71292	0.190517	0.0508022	0.0564801	0.209967	0.0528405	0.422855	0.356915	0.205123	0.0185722	0.151675	0.059703	0.0577277	0.0404742
NM_001037764.1	Rai1	retinoic acid induced 1 (Rai1). transcript variant 2. mRNA	0.195424	0.581733	0.169265	0.370289	0.115621	0.0334633	0.4184	0.0586734	0.0588663	0.0897973	0.0555519	0.357402	0.233974	0.124071	0.18075	0.0240226	0.0315301	0	0.163339	0
NM_001037800.3	Cd209b	CD209b antigen (Cd209b). transcript variant 2. mRNA	0	0	0	0	0.009916	0	0	0	0	0	0	0	0.0383092	0	0	0	0	0	0	0
NM_001037801.2	Cd6	CD6 antigen (Cd6). transcript variant 1. mRNA	0	0.697307	0.193198	0.0578193	0.0403448	0	3.10343	0	0.0267508	0	0.580451	0.657345	0.222662	0.285434	0	0	0	0	0.12919	0
NM_001037809.5	Cdh3	cadherin 3 (Cdh3). transcript variant 1. mRNA	0	0	0	0	0	0	0	0	0	0	0	0	0	0	0	0	0	0	0	0
NM_001037810.2	Spn	sialophorin (Spn). transcript variant 2. mRNA	0.50852	1.02791	0.555567	0.951727	0.622465	0.0731772	0.461674	0	0.111964	0	0.965093	0.568579	0.555508	0.444203	0.438777	0	0	0	0.269422	0
NM_001037812.3	Tmem237	transmembrane protein 237 (Tmem237). transcript variant 2. mRNA	0.122875	0.117365	0	0	0	0	0.575625	0	0	0	0.0178003	0.0547511	0	0.0110946	0	0	0	0	0	0
NM_001037822.1	Krtap5-5	keratin associated protein 5-5 (Krtap5-5). mRNA	0	0	0	0	0.0166646	0	0	0	0	0	0	0	0	0	0	0	0	0	0	0
NM_001037841.3	Cklf	chemokine-like factor (Cklf). transcript variant 4. mRNA	0	0	0	0	0.0419333	0	0.555469	0	0	0	0.0528871	0	0.0115715	0.0219757	0.0252594	0.0114351	0	0	0	0
NM_001037842.3	Nat8f3	N-acetyltransferase 8 (GCN5-related) family member 3 (Nat8f3). mRNA	0	0	0	0	0	0	0	0	0	0	0	0	0	0	0	0	0	0	0	0
NM_001037846.3	Cnot2	CCR4-NOT transcription complex. subunit 2 (Cnot2). transcript variant 1. mRNA	0.139941	0.213515	0.160102	0.231016	0.153237	0.0307885	1.50539	0.122475	0.0623481	0.007702	0.132748	0.20896	0.261401	0.28107	0.167828	0.0569827	0.0531846	0.0209348	0.0944635	0.0248364
NM_001037847.2	Cnot2	CCR4-NOT transcription complex. subunit 2 (Cnot2). transcript variant 2. mRNA	0.0382688	0.0745389	0.0574641	0.0350971	0.0821428	0	0.846581	0.0608956	0	0	0	0	0	0.0598931	0	0	0	0	0	0
NM_001037848.3	Cnot2	CCR4-NOT transcription complex. subunit 2 (Cnot2). transcript variant 4. mRNA	0	0.1812	0	0	0.0185215	0.0204675	2.24685	0.0592136	0.202633	0.12288	0	0.0766412	0	0	0.111568	0	0	0	0	0.0220143
NM_001037859.2	Csf1r	colony stimulating factor 1 receptor (Csf1r). mRNA	6.73456	9.71588	6.60563	8.72985	5.97033	0.542576	6.19688	0.809125	0.669566	0.198693	8.12894	12.5358	4.27696	6.42214	3.62837	0.149076	0.467018	0.230738	0.414746	0.517401
NM_001037863.2	Atp11c	ATPase. class VI. type 11C (Atp11c). transcript variant 1. mRNA	0.002873	0	0	0	0	0	0.551836	0	0	0	0.119036	0	0.069255	0.023607	0	0	0	0	0	0
NM_001037865.1	Col28a1	collagen. type XXVIII. alpha 1 (Col28a1). mRNA	0	0	0	0	0.0231847	0	0	0	0	0	0.005198	0	0	0.00972	0.005586	0	0	0	0	0
NM_001037877.3	Tcf25	transcription factor 25 (basic helix-loop-helix) (Tcf25). transcript variant 1. mRNA	0.105234	0.494425	0.212318	0.563423	0.439554	0.0351983	6.04017	0.346224	0.367478	0.162011	0.485635	0.369043	0.305873	0.444016	0.165004	0.1355	0.616129	0.0957331	0.428374	0.0795024
NM_001037878.4	Tcf25	transcription factor 25 (basic helix-loop-helix) (Tcf25). transcript variant 3. mRNA	3.03425	4.50464	3.72447	4.80629	3.4746	1.01044	72.0505	2.21624	2.63096	0.639552	3.87149	4.37316	2.91987	3.98061	2.4952	0.992748	0.811838	0.80103	1.24488	1.00087
NM_001037905.3	Dab2	disabled 2. mitogen-responsive phosphoprotein (Dab2). transcript variant 3. mRNA	0	0	0	0	0	0.151378	0	0	0.0958749	0	0	0	0	0	0	0.0387392	0.200155	0	0	0
NM_001037906.2	Nell1	NEL-like 1 (Nell1). mRNA	0	0	0.0480989	0.025705	0	0.0308323	0	0	0	0	0	0	0.007699	0	0	0	0	0	0.0236495	0.008291
NM_001037907.2	Ripply2	ripply transcriptional repressor 2 (Ripply2). transcript variant 3. mRNA	0	0	0	0	0	0	0	0	0	0	0	0	0	0	0	0	0	0	0	0
NM_001037909.3	C130026I21Rik	RIKEN cDNA C130026I21 gene (C130026I21Rik). transcript variant 2. mRNA	0.0371264	0.0542353	0	0.121301	0.509327	0	1.86968	0	0.087874	0	0.0932243	0.123659	0	0.119842	0.062613	0.0170073	0	0.0208276	0.158591	0.0741276
NM_001037913.2	Ccdc107	coiled-coil domain containing 107 (Ccdc107). mRNA	0.78535	1.72875	0.886185	1.45038	0.337346	0.0266279	19.521	0.295304	0.323536	0.0666104	1.12108	1.24636	1.10379	1.01024	0.522534	0.0788518	0.275985	0.144846	0.136164	0.114561
NM_001037914.3	Mcidas	multiciliate differentiation and DNA synthesis associated cell cycle protein (Mcidas). mRNA	0.00372	0.0380413	0.0191524	0.0102354	0	0	0.453115	0.00888	0.004144	0.009213	0.0140119	0.0129295	0.0183944	0.004367	0.005019	0.004544	0.0106038	0	0	0
NM_001037915.2	Ripply1	ripply transcriptional repressor 1 (Ripply1). mRNA	0	0	0	0	0	0	0	0	0	0	0	0	0	0	0	0	0	0	0	0
NM_001037916.3	Ccdc17	coiled-coil domain containing 17 (Ccdc17). mRNA	0.122417	0.204377	0.135051	0.240581	0.0538585	0.0541066	4.95651	0.0678311	0.0584364	0	0.0988036	0.157018	0.140515	0.169352	0.0589869	0	0.0373859	0.004905	0.049802	0.00582
NM_001037917.2	Gm6377	predicted gene 6377 (Gm6377). mRNA	0.112552	0.351675	0.281679	0.249457	0.119044	0.0851217	3.59323	0.171637	0.309928	0.0619446	0.133459	0.137638	0.162318	0.113764	0.0970177	0.0381919	0.0802042	0.0561251	0.102884	0.108201
NM_001037918.4	Lipt1	lipoyltransferase 1 (Lipt1). transcript variant 1. mRNA; nuclear gene for mitochondrial product	0.166577	0	0.0306282	0.278261	0	0	2.41538	0	0	0	0	0	0.0882481	0	0	0	0	0	0.135535	0
NM_001037919.3	Gm6460	predicted gene 6460 (Gm6460). mRNA	0	0	0.0137286	0	0	0	0.066625	0	0	0	0	0	0	0	0	0	0	0	0	0
NM_001037922.3	Cks1brt	CDC28 protein kinase 1b. retrogene (Cks1brt). mRNA	0.0219204	0.010674	0.0141066	0.0201036	0.0204571	0.0271278	1.01548	0	0.004069	0	0.0412815	0.0253952	0.0135483	0.008577	0.004929	0.004463	0	0	0.004624	0.009726
NM_001037923.4	Lekr1	leucine. glutamate and lysine rich 1 (Lekr1). transcript variant 2. mRNA	0	0.0727155	0.0183048	0.0391297	0.007964	0	0.322021	0.008487	0	0.008806	0.0357114	0.0164765	0.0615312	0.0166937	0.009594	0.0173732	0	0	0.0360007	0
NM_001037925.2	BC147527	cDNA sequence BC147527 (BC147527). mRNA	0.114814	0.076238	0.0403021	0.12205	0	0	3.06419	0.0249135	0.656856	0	0.373477	0	0.148377	0	0	0.15938	0.297513	0.240072	0	0.263975
NM_001037926.2	Zfp987	zinc finger protein 987 (Zfp987). mRNA	0.006152	0.098855	0.0435486	0	0	0.007613	0.365045	0.0183548	0.0102782	0.0457078	0.0308947	0.0570165	0.0228137	0.0505473	0.01245	0.003757	0.0263028	0.006902	0.007786	0
NM_001037927.1	Wdr93	WD repeat domain 93 (Wdr93). transcript variant 1. mRNA	0	0	0	0	0	0	0	0	0	0	0	0	0	0	0	0	0	0	0	0
NM_001037928.3	Gm11992	predicted gene 11992 (Gm11992). mRNA	0	0	0	0.0100392	0.0245179	0	0.0227913	0	0.008128	0	0	0	0	0	0	0	0	0	0	0
NM_001037929.2	Gm14092	predicted gene 14092 (Gm14092). mRNA	0	0	0	0	0	0	0	0	0	0	0	0	0	0	0	0	0	0	0	0
NM_001037932.2	Gm11437	predicted gene 11437 (Gm11437). mRNA	0	0	0	0	0	0	0	0	0	0	0	0	0	0	0	0	0	0	0	0
NM_001037933.2	Defb23	defensin beta 23 (Defb23). mRNA	0	0	0	0	0	0	0	0.0334974	0	0	0	0	0	0	0	0	0	0	0	0
NM_001037937.3	Deptor	DEP domain containing MTOR-interacting protein (Deptor). transcript variant 2. mRNA	0	0.0397338	0.107716	0	0.0445193	0.0116519	0	0.014982	0.016313	0.007773	0	0.0472667	0	0	0.0508114	0.003834	0.0164003	0	0.0119166	0
NM_001037938.2	Dhrs4	dehydrogenase/reductase (SDR family) member 4 (Dhrs4). transcript variant 1. mRNA	0.559763	0.763203	0.384244	0.376471	0.132341	0.0461827	4.9338	0.103918	0.180117	0.138633	0.452904	0.864663	0.653504	0.350425	0.176219	0.075977	0.106369	0.0976958	0.0157439	0.0993458
NM_001037940.4	Dnajb6	DnaJ heat shock protein family (Hsp40) member B6 (Dnajb6). transcript variant 1. mRNA	1.62014	5.21536	4.63666	2.14872	5.11362	1.88096	15.4523	5.78521	3.85406	2.84319	6.35805	5.49978	6.37194	9.87299	3.52096	3.91875	3.48426	3.65006	5.12029	5.51406
NM_001037941.3	Dnajb6	DnaJ heat shock protein family (Hsp40) member B6 (Dnajb6). transcript variant 2. mRNA	0.109465	0.159909	0.0805083	0.0430253	0.464088	0.0967638	3.07682	0.298606	0.0696715	0.348563	0.382849	0.380452	0.231966	0.550669	0.210983	0.191028	0.35659	0.175454	0.0989618	0.104077
NM_001037955.4	Dusp22	dual specificity phosphatase 22 (Dusp22). transcript variant 1. mRNA	0.398054	0.711173	0.445981	0.642143	0.17318	0.074424	9.22086	0.109365	0.0988798	0.0461001	0.449421	0.457836	0.530989	0.477318	0.220229	0.0874555	0.0938702	0.0417692	0.0688655	0.022871
NM_001037957.3	Dyrk1b	dual-specificity tyrosine-(Y)-phosphorylation regulated kinase 1b (Dyrk1b). transcript variant 1. mRNA	0	0.42068	0.129502	0	0.0543978	0	0	0	0	0.081632	0	0	0	0	0	0	0	0	0	0.355609
NM_001037987.3	Edil3	EGF-like repeats and discoidin I-like domains 3 (Edil3). transcript variant 1. mRNA	0	0	0.0399687	0.0202358	0	0	0.0204177	0	0	0	0	0	0	0	0	0	0	0	0	0
NM_001037997.3	Fer	fer (fms/fps related) protein kinase (Fer). transcript variant 1. mRNA	0	0.0820047	0.0469632	0.169895	0	0	0.254211	0.0200985	0	0.003476	0.155053	0	0.0138783	0.0197676	0	0	0	0	0	0
NM_001037999.2	Dbi	diazepam binding inhibitor (Dbi). transcript variant 1. mRNA	0	0	0	0	0	0	0.138362	0	0.0164486	0	0	0	0	0	0	0	0	0	0	0
NM_001038010.2	Kat2a	K(lysine) acetyltransferase 2A (Kat2a). transcript variant 2. mRNA	0.339359	0.680599	0.655171	0.276944	0.103064	0.177956	3.13464	0.0514838	0.237043	0.416673	0.649929	0.713008	0.47993	0.327447	0.283251	0.0281052	0.286912	0.171017	0	0.176093
NM_001038015.2	Gnpda2	glucosamine-6-phosphate deaminase 2 (Gnpda2). transcript variant 1. mRNA	0.636286	0.743604	0.436773	1.22546	0.295587	0.233316	0.515196	0.376873	0.251987	0.221786	1.4557	0.758992	0.617578	0.807726	0.311592	0.0806059	0.053738	0.253832	0.214755	0.326233
NM_001038018.5	Grk6	G protein-coupled receptor kinase 6 (Grk6). transcript variant 1. mRNA	4.36255	9.08229	5.90019	8.244	5.65307	1.45078	124.872	3.85612	2.99799	0	7.23457	6.09128	6.63636	8.03026	5.10295	1.60303	2.02816	1.2564	1.32134	1.04028
NM_001038230.2	Anapc11	anaphase promoting complex subunit 11 (Anapc11). transcript variant 1. mRNA	0.339005	0.623759	0.496278	0.487721	0.289809	0.163332	2.37611	0.206924	0.138355	0.163432	0.604315	0.452704	0.40946	0.431335	0.188538	0.0695468	0.103268	0.180016	0.127738	0.13434
NM_001038231.2	Banf1	BAF nuclear assembly factor 1 (Banf1). transcript variant 2. mRNA	0	0.217109	0	0.220181	0	0	1.89233	0	0	0	0	0.397338	0	0	0	0	0.162933	0	0	0
NM_001038492.2	Ctsa	cathepsin A (Ctsa). transcript variant 2. mRNA	0	0	0	0	0	0	0.115627	0	0	0	0.0557789	0	0.076276	0	0	0	0	0	0	0
NM_001038499.2	Arsi	arylsulfatase i (Arsi). mRNA	0.126732	0.0647968	0.0163114	0.0174343	0	0	0.296847	0	0	0	0.0238668	0.0513876	0.0156658	0.059503	0.0170985	0	0.0180617	0	0.00802	0
NM_001038500.2	Esp1	exocrine gland secreted peptide 1 (Esp1). mRNA	0	0	0	0	0	0	0	0	0	0	0	0	0	0	0	0	0	0	0	0
NM_001038587.4	Adar	adenosine deaminase. RNA-specific (Adar). transcript variant 2. mRNA	0.146051	0	0.237348	0.196861	0	0.12415	1.78767	0	0	0	0	0.317898	0.211542	0.398282	0	0.11714	0	0.0960029	0	0
NM_001038589.2	Usp14	ubiquitin specific peptidase 14 (Usp14). transcript variant 2. mRNA	0	0	0	0	0	0.0478127	0	0	0	0.0478419	0.0431162	0.0944912	0	0	0	0	0	0	0	0
NM_001038590.1	Cldn19	claudin 19 (Cldn19). transcript variant 1. mRNA	0	0	0	0	0	0	0	0	0	0	0.0495254	0	0	0	0	0	0	0	0	0
NM_001038592.1	Glrx2	glutaredoxin 2 (thioltransferase) (Glrx2). transcript variant 1. mRNA; nuclear gene for mitochondrial product	0.257636	0.436721	0.428573	0.501543	0.332076	0.0721901	0.743896	0.101524	0.0893373	0	0.424162	0.301292	0.360536	0.216823	0.288572	0.0890721	0	0.0736292	0.126126	0.0323524
NM_001038593.1	Glrx2	glutaredoxin 2 (thioltransferase) (Glrx2). transcript variant 3. mRNA; nuclear gene for mitochondrial product	0	0.149601	0	0	0	0	0	0	0	0	0	0.0260435	0	0	0	0	0	0	0	0
NM_001038594.1	Glrx2	glutaredoxin 2 (thioltransferase) (Glrx2). transcript variant 4. mRNA; nuclear gene for mitochondrial product	0	0	0	0	0	0	2.74686	0	0	0.078695	0	0.0353395	0	0	0	0	0.065211	0	0	0
NM_001038602.4	Marveld2	MARVEL (membrane-associating) domain containing 2 (Marveld2). transcript variant 1. mRNA	0.077244	0.175529	0.110466	0.133813	0.0128156	0.0177026	0.55396	0	0.0509847	0	0.118531	0.099432	0.0990208	0.167905	0	0	0	0	0.0217257	0.007616
NM_001038604.1	Clec5a	C-type lectin domain family 5. member a (Clec5a). transcript variant 1. mRNA	0.245293	0	0.351117	0.0630737	0.654665	0.249661	4.86851	0.281799	0.870712	0.320783	0.365529	0	0.0793463	0.212579	0.27218	0.0896131	0.0588094	0.352377	0.264036	0.0976467
NM_001038607.2	Kcnh1	potassium voltage-gated channel. subfamily H (eag-related). member 1 (Kcnh1). transcript variant 2. mRNA	0	0	0.0125444	0	0	0	0	0	0	0	0	0.001411	0	0	0	0	0	0	0	0
NM_001038608.3	Txnl4a	thioredoxin-like 4A (Txnl4a). transcript variant 3. mRNA	1.24197	1.62901	1.03393	1.98482	1.07127	0.660587	1.61754	0.775798	1.23618	0.752613	2.39533	1.78172	1.52218	1.74938	0.919822	0.477743	0.994235	0.504019	0.48161	0.41505
NM_001038609.2	Mapt	microtubule-associated protein tau (Mapt). transcript variant 1. mRNA	0	0	0	0	0	0	0	0	0	0	0	0	0	0	0	0	0	0	0	0
NM_001038610.2	Dach1	dachshund family transcription factor 1 (Dach1). transcript variant 2. mRNA	0.006597	0	0.0382073	0.0226875	0.0720298	0.067352	1.01466	0	0.29758	0.0347177	0	0.0191062	0	0.0251655	0	0.0684966	0.0517089	0.220193	0	0
NM_001038612.1	Olfm1	olfactomedin 1 (Olfm1). transcript variant 2. mRNA	0.0167122	0.0244136	0.258118	0.126448	0	0	0.130484	0	0.0744581	0	0.0209821	0.0387228	0.0619757	0	0	0	0	0	0	0
NM_001038613.1	Olfm1	olfactomedin 1 (Olfm1). transcript variant 3. mRNA	0	0	0.444804	0.461969	0.186212	0.0968358	0.570207	0	0	0.0161492	0.008187	0.154862	0.165238	0.440097	0.299116	0.0358444	0.0511122	0.0438961	0.0495177	0.086795
NM_001038614.1	Olfm1	olfactomedin 1 (Olfm1). transcript variant 4. mRNA	0	0	0.0223856	0.0837433	0.0389559	0	0.434551	0	0	0	0	0.0402994	0.0429994	0.0408308	0	0	0.0495756	0	0.0880534	0
NM_001038616.2	Dmrtc1a	DMRT-like family C1a (Dmrtc1a). transcript variant 3. mRNA	0	0	0	0	0	0	0	0	0	0	0	0	0	0	0	0	0	0	0	0
NM_001038619.2	Dnm3	dynamin 3 (Dnm3). transcript variant 1. mRNA	0	0	0	0	0	0	0	0	0	0	0	0	0	0	0	0	0	0	0	0
NM_001038621.2	Rabgap1l	RAB GTPase activating protein 1-like (Rabgap1l). transcript variant 2. mRNA	0.287393	1.30592	0.899844	1.16137	0.0897466	0.0444582	30.1199	0	0	0	0.608886	0.856386	0.874479	1.0477	0.343006	0	0	0	0	0
NM_001038624.1	Ric3	RIC3 acetylcholine receptor chaperone (Ric3). transcript variant 1. mRNA	0	0.0120618	0.004251	0.002272	0.007397	0.006131	0.263026	0	0	0	0.008293	0	0	0.001938	0	0	0	0	0	0.004396
NM_001038625.1	Sertad2	SERTA domain containing 2 (Sertad2). transcript variant 2. mRNA	0.456979	0.818235	0.99049	0.735616	0.350065	0.216005	12.0122	0.588934	0.500161	0.0903845	0.655415	0.485302	0.152991	0.771076	0.338246	0.366342	0.0995015	0.169127	0.477972	0.418192
NM_001038627.1	Smurf1	SMAD specific E3 ubiquitin protein ligase 1 (Smurf1). transcript variant 1. mRNA	0.495907	0.482157	0.0993334	0.630252	0.266648	0.158509	29.1137	0.0685903	0.159122	0.134205	0.632919	0.329111	0.412056	0.435606	0.485187	0.100296	0	0	0.143405	0
NM_001038635.2	Stk35	serine/threonine kinase 35 (Stk35). transcript variant 2. mRNA	0.0899161	0.112587	0	0.0706832	0.0755225	0.04769	0.340992	0.0364087	0.0178841	0	0	0.159975	0	0.214856	0	0	0.0137301	0	0	0.0384705
NM_001038637.1	Gng2	guanine nucleotide binding protein (G protein). gamma 2 (Gng2). transcript variant 2. mRNA	1.0381	2.00343	1.64869	2.05698	1.09857	0	9.43626	0.443281	0.623217	0	1.21067	1.13646	1.27735	1.30236	0.970134	0.168695	0.2036	0.336596	0.201906	0.0950781
NM_001038641.2	Slx4ip	SLX4 interacting protein (Slx4ip). transcript variant 2. mRNA	0	0	0	0	0	0	0.0108767	0	0	0	0	0	0	0	0	0	0	0	0	0
NM_001038642.2	Ets1	E26 avian leukemia oncogene 1. 5' domain (Ets1). transcript variant 2. mRNA	0.524994	1.35543	0.96429	1.0407	0.734923	0.038351	29.7691	1.9906	1.39894	0	1.19696	0.893317	0.630938	1.45714	0.568127	0.578969	0.807969	0.490861	0.256098	0
NM_001038643.1	Slco3a1	solute carrier organic anion transporter family. member 3a1 (Slco3a1). transcript variant 2. mRNA	0.202301	0.201496	0.213036	0.261435	0.343267	0.0758666	5.00659	0.149982	0.25947	0.102483	0.334804	0.191757	0.242494	0.302222	0.277077	0.0524207	0.0698952	0.141002	0.0620719	0.0775201
NM_001038651.3	Zfp953	zinc finger protein 953 (Zfp953). mRNA	0.130197	0.454816	0.31329	0.438689	0.207089	0.0303573	2.03899	0.0180154	0.0546443	0.004673	0.307973	0.279812	0.167939	0.208196	0.165477	0.0138301	0.0322706	0.008468	0.0358233	0.0150699
NM_001038653.1	Slc16a3	solute carrier family 16 (monocarboxylic acid transporters). member 3 (Slc16a3). mRNA	0.398856	0.407346	0.53153	0.606966	1.37166	0	2.96535	1.78189	0.511093	0.253511	0.983801	0.498886	0.235613	0.248589	0.323831	0.0689887	0	0	0	0.131553
NM_001038654.1	Slc16a3	solute carrier family 16 (monocarboxylic acid transporters). member 3 (Slc16a3). mRNA	0.168831	0.150124	0.335395	0.151472	0.341154	0	3.25535	1.23084	0.0572323	0	0	0.170082	0.299437	0.163708	0	0	0	0.271784	0	0
NM_001038655.1	Gng7	guanine nucleotide binding protein (G protein). gamma 7 (Gng7). transcript variant 1. mRNA	0	0	0	0	0	0	0	0	0	0	0	0	0	0	0	0	0	0	0	0
NM_001038658.2	Faim2	Fas apoptotic inhibitory molecule 2 (Faim2). transcript variant 2. mRNA	0	0	0	0	0	0	0	0	0	0	0	0	0	0	0	0	0	0	0	0
NM_001038660.2	Slc7a15	solute carrier family 7 (cationic amino acid transporter. y+ system). member 15 (Slc7a15). transcript variant 1. mRNA	0	0	0	0	0	0	0	0	0	0	0	0	0	0	0	0	0	0	0	0
NM_001038663.1	Mapk1	mitogen-activated protein kinase 1 (Mapk1). transcript variant 2. mRNA	0.484999	1.56267	0.781747	1.67113	0.817262	0.280475	17.1713	0.638324	0.727007	0.516389	1.03004	1.11851	0.818046	1.00557	0.898973	0.498334	0.355298	0.239024	0.470427	0.494741
NM_001038664.2	Gngt2	guanine nucleotide binding protein (G protein). gamma transducing activity polypeptide 2 (Gngt2). transcript variant 2. mRNA	0.14944	0.305629	0.192341	0.287814	0.100414	0.0739764	2.80029	0	0	0	0.337719	0.432823	0.461822	0.0526236	0.080649	0	0.170384	0.234737	0.0378284	0
NM_001038676.1	Obox7	oocyte specific homeobox 7 (Obox7). mRNA	0	0	0	0	0	0	0	0	0	0	0	0	0	0	0	0	0	0	0	0
NM_001038695.3	Kdm3a	lysine (K)-specific demethylase 3A (Kdm3a). transcript variant 2. mRNA	0.224822	0.564152	0.718741	0.249422	0.538073	0.143603	4.10526	0.558263	0.244355	0.103278	0.892319	0.476812	0.0874076	0.608662	0.0709394	0	0	0.0956095	0	0
NM_001038696.1	Rnpc3	RNA-binding region (RNP1. RRM) containing 3 (Rnpc3). transcript variant 1. mRNA	0.155413	0.52645	0.211624	0.319148	0.0655827	0.0222995	4.75522	0.0430091	0.030105	0	0.175326	0.112205	0.161485	0.0898896	0.0607771	0.005503	0.0353105	0.0252711	0.0171045	0
NM_001038697.2	Fthl17f	ferritin. heavy polypeptide-like 17. member F (Fthl17f). mRNA	0	0	0	0	0	0	0	0	0	0	0	0	0	0	0	0	0	0	0	0
NM_001038698.1	Elavl4	ELAV like RNA binding protein 4 (Elavl4). transcript variant 2. mRNA	0	0	0	0	0	0	0	0	0	0	0	0	0	0	0	0	0	0	0	0
NM_001038699.2	Fn3k	fructosamine 3 kinase (Fn3k). transcript variant 2. mRNA	0.004512	0.0131816	0	0	0.0126316	0.011167	0.32408	0.0161533	0.0150758	0	0.005664	0.0470419	0	0.005296	0.0182613	0	0.01286	0.0227791	0.0114206	0.006005
NM_001038700.2	Fnbp1	formin binding protein 1 (Fnbp1). transcript variant 1. mRNA	1.20616	2.21516	2.30383	1.87929	1.50829	0.658122	29.3113	0.993382	1.01081	0.744418	2.61259	2.82151	1.98401	2.15308	1.50515	0.546058	0.431125	0.469112	0.853532	0.664258
NM_001038701.2	Gabrb3	gamma-aminobutyric acid (GABA) A receptor. subunit beta 3 (Gabrb3). transcript variant 2. mRNA	0	0	0.0858211	0.0327603	0	0.001965	0.044624	0	0	0	0	0	0.0137374	0	0	0	0	0.007125	0	0
NM_001038703.3	Gpr146	G protein-coupled receptor 146 (Gpr146). transcript variant 2. mRNA	0.0887124	0.376439	0.43497	0.249891	0.50384	0.0365957	19.1698	0	0.449353	0.0313869	0.167068	0.0489405	0.373369	0.473545	0.213731	0.219318	0	0.31519	0	0.0253037
NM_001038708.3	Cdc42se1	CDC42 small effector 1 (Cdc42se1). transcript variant 2. mRNA	0.536608	2.16614	0.0653875	0.270819	1.83484	0	16.6497	0	0.254637	0	2.18458	2.51243	1.35804	2.19522	1.01529	0.182301	0.18101	0.431064	0	0.486043
NM_001038710.1	Tmod2	tropomodulin 2 (Tmod2). transcript variant 1. mRNA	0	0	0	0	0	0	0	0	0	0	0	0	0	0	0	0	0	0	0	0
NM_001038839.3	P2rx7	purinergic receptor P2X. ligand-gated ion channel. 7 (P2rx7). transcript variant 3. mRNA	0.061767	0.0501283	0	0	0	0	0.171471	0.0573342	0.0152884	0	0	0	0	0.0765297	0	0	0.0195622	0	0.0173726	0
NM_001038845.3	P2rx7	purinergic receptor P2X. ligand-gated ion channel. 7 (P2rx7). transcript variant 2. mRNA	0	0	0.0178836	0	0	0	0.0759408	0	0	0	0	0	0	0.0244644	0.0187466	0	0.009901	0	0	0.009248
NM_001038846.1	Rcsd1	RCSD domain containing 1 (Rcsd1). transcript variant 2. mRNA	0.644909	0.917309	0.91742	0.775122	1.18598	0	17.9256	1.14639	0.007561	0.0294222	0.88639	0.609509	0.683911	1.07174	1.2502	0.153415	0.522446	0.129482	0	0
NM_001038887.2	P2rx7	purinergic receptor P2X. ligand-gated ion channel. 7 (P2rx7). transcript variant 4. mRNA	0	0.128248	0.0282485	0.0452897	0	0	1.61081	0.0261935	0	0	0	0	0	0	0	0	0	0.0246251	0	0
NM_001038993.5	Rnf38	ring finger protein 38 (Rnf38). transcript variant 2. mRNA	0	0	0.002277	0	0	0	0	0	0	0.0175259	0	0	0.004374	0	0	0	0	0	0	0
NM_001038995.2	Gm4787	predicted gene 4787 (Gm4787). mRNA	0	0.0101894	0.008977	0.009595	0	0	0.283189	0	0	0	0.0175144	0.008081	0	0	0	0	0	0	0	0
NM_001038996.2	Try10	trypsin 10 (Try10). mRNA	0	0	0	0	0	0	0	0	0.0219191	0	0	0	0	0	0	0	0	0	0	0
NM_001038997.2	Gm5771	predicted gene 5771 (Gm5771). mRNA	0	0	0	0	0	0	0	0	0	0	0	0	0	0	0	0	0	0	0	0
NM_001038998.2	Svbp	small vasohibin binding protein (Svbp). transcript variant 1. mRNA	0	0.0311259	0.0548475	0.131902	0	0.118659	1.43069	0.101715	0.189859	0.131924	0	0	0	0.10004	0.0574943	0.0520563	0.151833	0	0.0404515	0.0283615
NM_001038999.2	Atp8a1	ATPase. aminophospholipid transporter (APLT). class I. type 8A. member 1 (Atp8a1). transcript variant 1. mRNA	0	0	0	0	0	0	0	0	0	0	0	0	0	0	0	0	0	0	0	0
NM_001039000.4	Kif5a	kinesin family member 5A (Kif5a). transcript variant 1. mRNA	0	0	0.0231331	0.003804	0.0154833	0.0153991	0	0	0	0.0273929	0	0	0.006836	0.0292113	0	0	0	0.0108585	0	0
NM_001039038.2	Nhlrc4	NHL repeat containing 4 (Nhlrc4). mRNA	0.0654437	0.0776766	0.0737022	0.0393879	0.0229032	0.0354334	0.408774	0.102511	0.159454	0.09117	0.0770292	0.0995109	0.106178	0.0912208	0.115888	0.0999305	0.104928	0.119318	0.0983609	0.0217778
NM_001039039.3	Kctd21	potassium channel tetramerisation domain containing 21 (Kctd21). mRNA	0.0529847	0.180603	0.090927	0.129582	0.0857095	0	0.073545	0.007026	0.0590159	0	0.214349	0.109127	0.0727738	0.0760139	0.103258	0.0143833	0.0167807	0.006605	0.0223537	0
NM_001039042.2	Klk13	kallikrein related-peptidase 13 (Klk13). mRNA	0	0	0.0218222	0	0	0.0209827	0.0529517	0	0	0	0	0	0	0	0	0	0	0	0	0
NM_001039045.1	Pigc	phosphatidylinositol glycan anchor biosynthesis. class C (Pigc). transcript variant 2. mRNA	0.351566	0.338494	0.65817	0.57524	0.280374	0.108771	0.873389	0.0635718	0.124595	0.257252	0.745683	0.290044	0.391784	0.365773	0.244351	0.152915	0.0607331	0.161366	0.128097	0.180804
NM_001039047.1	Trim58	tripartite motif-containing 58 (Trim58). mRNA	1.90964	0.922104	0.904984	0.978275	1.36011	1.02344	3.6308	1.48758	2.47855	1.20711	0.993129	1.34685	1.34326	0.980083	0.905535	0.927252	0.757266	0.909925	1.34501	1.10078
NM_001039048.2	Trim63	tripartite motif-containing 63 (Trim63). transcript variant 1. mRNA	0.0232163	0.06783	0	0.006388	0.0207999	0.005746	1.74016	0.005541	0.005172	0	0.0408073	0.0161379	0	0.0109005	0.0125292	0.0113442	0.006618	0.00521	0	0
NM_001039049.1	Cox8c	cytochrome c oxidase subunit 8C (Cox8c). mRNA; nuclear gene for mitochondrial product	0	0	0	0	0	0	0	0	0	0	0	0	0	0	0	0	0	0	0	0
NM_001039050.1	Pkib	protein kinase inhibitor beta. cAMP dependent. testis specific (Pkib). transcript variant 2. mRNA	0	0	0	0	0	0	0	0	0	0	0	0	0	0	0	0	0	0	0	0
NM_001039051.2	Pkib	protein kinase inhibitor beta. cAMP dependent. testis specific (Pkib). transcript variant 3. mRNA	0.0455172	0.0261222	0.0460304	0.0872166	0	0.175026	0.335079	0.0543222	0.450854	0.0966252	0	0.0621491	0.112531	0.0782337	0.0789572	0.119149	0.347522	0.0638368	0.213979	0.112519
NM_001039052.1	Pkib	protein kinase inhibitor beta. cAMP dependent. testis specific (Pkib). transcript variant 4. mRNA	0	0	0	0	0	0	0	0	0	0	0.0419083	0	0	0	0	0	0	0	0	0
NM_001039053.2	Pkib	protein kinase inhibitor beta. cAMP dependent. testis specific (Pkib). transcript variant 5. mRNA	0	0	0	0	0	0	0	0	0	0	0	0	0	0	0	0	0	0	0	0
NM_001039056.2	Kcnj15	potassium inwardly-rectifying channel. subfamily J. member 15 (Kcnj15). transcript variant 3. mRNA	0	0	0	0	0	0	0	0	0	0	0	0	0	0	0	0	0	0	0	0
NM_001039057.2	Kcnj15	potassium inwardly-rectifying channel. subfamily J. member 15 (Kcnj15). transcript variant 1. mRNA	0	0	0	0	0	0	0	0	0	0	0	0	0	0	0	0	0	0	0	0
NM_001039059.1	Klhl15	kelch-like 15 (Klhl15). transcript variant 3. mRNA	0	0	0	0	0.0187577	0	0.0435919	0.0199895	0.0124374	0	0	0	0.0207047	0.006553	0	0	0	0.006264	0	0
NM_001039060.1	Klhl15	kelch-like 15 (Klhl15). transcript variant 2. mRNA	0	0.0255791	0	0	0.014707	0	1.23726	0	0	0	0	0.005071	0	0.0154149	0	0	0.0124775	0	0.00554	0.005827
NM_001039061.1	Klhl15	kelch-like 15 (Klhl15). transcript variant 1. mRNA	0	0	0.0381588	0	0	0	0.520834	0	0	0	0	0	0	0	0	0	0	0	0	0
NM_001039071.2	Ldb3	LIM domain binding 3 (Ldb3). transcript variant 2. mRNA	0.003608	0	0.0417967	0.0148913	0	0.004465	0	0	0	0	0.031711	0.0501625	0	0.004235	0.0584182	0	0.0257121	0.0283386	0	0
NM_001039072.2	Ldb3	LIM domain binding 3 (Ldb3). transcript variant 3. mRNA	0	0	0	0	0	0	0	0	0	0	0	0	0.004411	0	0	0	0	0	0	0
NM_001039073.2	Ldb3	LIM domain binding 3 (Ldb3). transcript variant 4. mRNA	0	0	0	0	0	0	0.0230944	0	0	0.004578	0	0	0	0	0	0	0	0	0	0
NM_001039074.2	Ldb3	LIM domain binding 3 (Ldb3). transcript variant 5. mRNA	0	0.0516461	0	0	0	0	0	0	0	0	0	0	0	0	0	0	0	0	0	0
NM_001039075.2	Ldb3	LIM domain binding 3 (Ldb3). transcript variant 6. mRNA	0	0	0	0	0	0	0	0	0	0	0	0	0	0	0	0.0426198	0	0	0	0
NM_001039076.2	Ldb3	LIM domain binding 3 (Ldb3). transcript variant 7. mRNA	0.0755395	0.0472929	0	0.0296909	0	0.0934847	0.101107	0.0772732	0.0480789	0	0.0135485	0.12502	0.106717	0.0380005	0.116476	0	0.0461392	0.0605385	0.088779	0
NM_001039077.2	Plpbp	pyridoxal phosphate binding protein (Plpbp). transcript variant 2. mRNA	0.0478862	0.0786976	0.0616332	0.148221	0.0268138	0.0444465	3.00976	0.0571494	0.0266685	0	0.0901816	0.124823	0	0	0.129215	0	0.0170617	0	0	0
NM_001039078.2	Plpbp	pyridoxal phosphate binding protein (Plpbp). transcript variant 3. mRNA	0.0368207	0	0	0	0	0	0	0	0	0	0	0	0	0	0	0	0	0	0	0
NM_001039079.2	Prkcz	protein kinase C. zeta (Prkcz). transcript variant 2. mRNA	0	0	0	0.0732612	0	0	0	0	0	0	0	0	0	0	0	0	0	0	0	0
NM_001039080.1	Rbms2	RNA binding motif. single stranded interacting protein 2 (Rbms2). transcript variant 2. mRNA	0	0	0	0.0245859	0	0	0.111631	0	0	0	0	0	0	0.0457699	0	0	0	0	0	0
NM_001039081.2	Mier1	MEIR1 treanscription regulator (Mier1). transcript variant 2. mRNA	1.02073	2.66859	1.93185	2.7514	1.39831	0.386889	17.7331	0.62932	0.845348	0.555035	2.03105	1.53817	1.1314	2.07572	0.983319	0.253061	0.351606	0.450067	0.622118	0.150407
NM_001039084.1	Mrpl1	mitochondrial ribosomal protein L1 (Mrpl1). transcript variant 2. mRNA; nuclear gene for mitochondrial product	0.0332762	0.17824	0.0142763	0.00763	0.0496879	0	2.65008	0.0264755	0.0432414	0	0.0557043	0.0385511	0.0342783	0.0520793	0.14217	0	0.0158083	0	0.007019	0
NM_001039086.1	Rapgef1	Rap guanine nucleotide exchange factor (GEF) 1 (Rapgef1). transcript variant 2. mRNA	0	0	0	0	0	0	0	0	0	0	0	0	0	0	0	0	0	0	0	0
NM_001039087.1	Rapgef1	Rap guanine nucleotide exchange factor (GEF) 1 (Rapgef1). transcript variant 1. mRNA	0	0	0	0	0	0	0	0	0	0	0	0	0	0	0	0	0	0	0	0
NM_001039088.1	Seh1l	SEH1-like (S. cerevisiae (Seh1l). transcript variant 1. mRNA	0.509311	1.36162	0.824176	0.93193	0.32672	0.174404	9.23491	0.168187	0.435103	0.244928	0.949848	0.753313	0.736547	0.847406	0.320228	0.172152	0.24313	0.227466	0.294147	0.17113
NM_001039089.1	Sel1l	sel-1 suppressor of lin-12-like (C. elegans) (Sel1l). transcript variant 1. mRNA	0.549062	1.02342	0.941053	1.08424	0.848395	0.206429	7.88362	0.328466	0.520214	0.192785	0.975556	0.921136	0.285233	0.961019	0.57575	0.169803	0.154522	0.243296	0.253342	0.15172
NM_001039090.2	Skil	SKI-like (Skil). transcript variant 2. mRNA	0.305895	0.48379	0.418113	0.749464	0.184025	0.253418	21.8899	0.660743	0.295662	0.0391317	0.491966	0.478859	0.176564	0.130567	0.117673	0.140514	0.0864711	0.133312	0.196781	0.0605711
NM_001039092.4	Tom1l2	target of myb1-like 2 (chicken) (Tom1l2). transcript variant 2. mRNA	0.0300327	0	0.0591185	0.267335	0	0	0.628979	0.0674679	0.0472254	0	0.215146	0.225134	0	0.12442	0	0	0	0.114963	0	0.06114
NM_001039093.1	Tom1l2	target of myb1-like 2 (chicken) (Tom1l2). transcript variant 3. mRNA	0.12019	0.06828	0.111723	0.110229	0.0448668	0	3.08634	0	0	0.0330741	0.209581	0.0850927	0.0577779	0.0470262	0.0720706	0.0163135	0.009516	0	0.0422559	0
NM_001039094.3	Negr1	neuronal growth regulator 1 (Negr1). transcript variant 1. mRNA	0	0	0.0338	0.0240845	0	0.004333	0	0	0	0	0	0	0	0	0	0	0	0	0.008863	0
NM_001039095.1	Glt6d1	glycosyltransferase 6 domain containing 1 (Glt6d1). mRNA	0	0	0	0	0	0	0	0	0	0	0	0	0	0	0	0	0	0	0	0
NM_001039103.3	Rasa4	RAS p21 protein activator 4 (Rasa4). transcript variant 2. mRNA	0	0.132733	0	0.155168	0.154388	0	0.665391	0	0.0628165	0.0310388	0	0	0.0968255	0	0	0	0.142891	0	0	0.225207
NM_001039104.2	Trpm1	transient receptor potential cation channel. subfamily M. member 1 (Trpm1). transcript variant 2. mRNA	0.001533	0	0	0.008438	0	0	0	0	0	0	0	0.0106588	0	0.0107993	0	0	0	0.006882	0.003882	0
NM_001039105.3	Kcnrg	potassium channel regulator (Kcnrg). transcript variant 1. mRNA	0.0292231	0.12807	0.0250749	0.0469018	0.136362	0	0.669288	0.0116254	0	0	0.116184	0.0902814	0.0120413	0.0800378	0.085426	0.0118994	0	0.0109293	0	0.0129662
NM_001039106.3	Ddhd1	DDHD domain containing 1 (Ddhd1). transcript variant 1. mRNA	0.143188	0.0561197	0.0966421	0.0456419	0	0	1.48882	0	0	0.0475716	0.0306929	0.0910353	0	0.0655898	0	0.038396	0	0	0.0839843	0.0418381
NM_001039114.1	Acsbg2	acyl-CoA synthetase bubblegum family member 2 (Acsbg2). mRNA	0	0	0	0	0	0	0	0	0	0	0	0	0	0	0	0	0	0	0	0
NM_001039115.2	Zkscan4	zinc finger with KRAB and SCAN domains 4 (Zkscan4). mRNA	0	0.067303	0.036491	0.0292523	0	0	0.0221364	0	0	0.008777	0.0266968	0.0164231	0.008762	0.0207996	0.009563	0	0	0	0	0
NM_001039116.2	Dmrtc1b	DMRT-like family C1b (Dmrtc1b). transcript variant 2. mRNA	0	0	0	0	0	0	0	0	0	0	0	0	0	0	0	0	0	0	0	0
NM_001039119.2	Defb33	defensin beta 33 (Defb33). mRNA	0	0	0	0	0	0	0	0	0	0	0	0	0	0	0	0	0	0	0	0
NM_001039120.2	Defb26	defensin beta 26 (Defb26). mRNA	0	0	0	0	0	0	0	0	0	0	0	0	0	0	0	0	0	0	0	0
NM_001039121.1	Defb43	defensin beta 43 (Defb43). mRNA	0	0	0	0	0	0	0	0	0	0	0	0	0	0	0	0	0	0	0	0
NM_001039122.1	Defb25	defensin beta 25 (Defb25). mRNA	0.0589709	0.0861464	0	0.0405625	0	0.0364901	0	0.105568	0	0	0.111057	0	0	0	0	0	0.16809	0	0	0
NM_001039123.2	Defb18	defensin beta 18 (Defb18). mRNA	0	0	0	0	0	0	0	0	0	0	0	0	0	0	0	0	0	0	0	0
NM_001039124.4	Kncn	kinocilin (Kncn). transcript variant 2. mRNA	0	0	0	0	0	0	0.0629449	0	0	0	0	0	0	0	0	0	0	0	0	0
NM_001039125.2	Defb47	defensin beta 47 (Defb47). mRNA	0	0	0	0	0	0	0	0	0	0	0	0	0	0	0	0	0	0	0	0
NM_001039126.2	Asb1	ankyrin repeat and SOCS box-containing 1 (Asb1). transcript variant 1. mRNA	0.987035	1.75897	1.23452	1.67864	1.00026	3.92228	5.94077	1.13421	1.04058	0.802734	1.8395	0.757802	0.884717	2.60981	2.01832	0.870711	0.0710672	0.714156	1.25483	0.894106
NM_001039128.1	Tas2r122	taste receptor. type 2. member 122 (Tas2r122). mRNA	0	0	0	0	0	0	0	0	0	0	0	0	0	0	0	0	0	0	0	0
NM_001039129.4	Hnrnpa1	heterogeneous nuclear ribonucleoprotein A1 (Hnrnpa1). transcript variant 2. mRNA	0.869068	1.80718	2.04878	2.25692	0.724984	0.773718	85.6075	1.3494	0.923545	0.247082	1.43069	1.49997	1.92385	1.37402	1.1486	0.568731	0.492907	0.462665	0.376005	0.165258
NM_001039137.3	Scoc	short coiled-coil protein (Scoc). transcript variant 1. mRNA	0	0	0	0	0	0	0.445674	0	0	0	0	0	0	0	0	0	0	0	0	0
NM_001039138.2	Camk2g	calcium/calmodulin-dependent protein kinase II gamma (Camk2g). transcript variant 2. mRNA	0	0	0	0.0456699	0	0	0	0	0	0	0.0476345	0	0	0	0.003199	0	0	0	0	0
NM_001039139.2	Camk2g	calcium/calmodulin-dependent protein kinase II gamma (Camk2g). transcript variant 3. mRNA	0	0	0	0	0	0	0	0	0	0	0	0	0	0	0	0	0	0	0	0
NM_001039143.2	Nlrp5	NLR family. pyrin domain containing 5 (Nlrp5). transcript variant 2. mRNA	0	0	0	0	0	0	0	0	0	0	0	0	0	0	0	0	0	0	0	0
NM_001039147.2	Morf4l1	mortality factor 4 like 1 (Morf4l1). transcript variant 1. mRNA	0.582942	0.470275	1.25982	0.532633	0.594372	0	5.43458	0.789162	0.547543	0	1.34361	0.67535	0.467851	0.66383	0	0	0.285201	0.44905	0.132146	0.828062
NM_001039149.1	Cd226	CD226 antigen (Cd226). transcript variant 2. mRNA	0.758304	0	1.41677	0.992706	0.798999	0	1.85895	0.48169	0.51313	0.191843	5.30282	0.632905	0.408209	1.20115	0.973588	0.0946246	0	0	0.376681	0.0217068
NM_001039150.1	Cd44	CD44 antigen (Cd44). transcript variant 2. mRNA	0	0	0.437109	0	0.143595	0	8.73952	0.0579014	0.158257	0	0.204491	0	0	0.0610159	0.107537	0	0.256824	0	0.0570195	0
NM_001039151.1	Cd44	CD44 antigen (Cd44). transcript variant 3. mRNA	7.54361	8.49561	9.36409	15.4216	16.8494	3.95255	24.6326	5.22679	9.66773	3.50486	19.7973	11.1348	4.15179	11.2304	9.30949	2.63254	2.82223	3.18897	3.45911	4.25918
NM_001039153.3	Tctn1	tectonic family member 1 (Tctn1). transcript variant 1. mRNA	0.0728516	0.572809	0.250961	0.321295	0.239959	0	3.27231	0.107402	0	0.08756	0.223282	0.327671	0.137731	0.28672	0	0.0418794	0	0	0	0
NM_001039154.2	Cdh8	cadherin 8 (Cdh8). transcript variant 1. mRNA	0	0	0	0	0	0	0	0	0	0	0	0	0	0	0	0	0	0	0	0
NM_001039155.1	Triobp	TRIO and F-actin binding protein (Triobp). transcript variant 4. mRNA	0	0	0	0	0	0	0	0	0	0	0	0	0	0	0	0	0	0	0	0
NM_001039156.1	Triobp	TRIO and F-actin binding protein (Triobp). transcript variant 3. mRNA	0	0	0	0	0	0	0	0	0	0	0	0	0	0	0	0	0	0	0	0
NM_001039157.2	Ube2j2	ubiquitin-conjugating enzyme E2J 2 (Ube2j2). transcript variant 2. mRNA	0.302865	0	0.336502	0.576892	0.327581	0.182601	2.52233	0.395434	0.273908	0.173096	0.415996	0.440842	0.252788	0.0334232	0	0.0948646	0	0.0726086	0.0556971	0
NM_001039158.2	Ube2j2	ubiquitin-conjugating enzyme E2J 2 (Ube2j2). transcript variant 3. mRNA	0.112171	0.163863	0.0402901	0.139957	0	0	1.01838	0.0684916	0.040678	0	0	0.0543988	0.0548188	0.0826741	0.119664	0	0	0	0	0.0902803
NM_001039159.2	Ube2j2	ubiquitin-conjugating enzyme E2J 2 (Ube2j2). transcript variant 4. mRNA	0	0.079458	0.276529	0.0561199	0.17665	0	0	0.0519314	0.160547	0	0.0170724	0.160688	0.0537893	0	0.212818	0.0498334	0.166667	0.137312	0	0
NM_001039160.2	Gvin1	GTPase. very large interferon inducible 1 (Gvin1). transcript variant 2. mRNA	0.0791968	0.445418	0.503291	0.0217899	0.113083	0.230325	5.09828	0.0602545	0.635125	0.0907154	0.431284	0.0596382	0.190902	0.750659	0.360623	0.0302328	0	0.203261	0	0.0434848
NM_001039162.2	Clip2	CAP-GLY domain containing linker protein 2 (Clip2). transcript variant 2. mRNA	0.665532	0.64902	0.482263	0.832102	1.01308	0.247312	2.94782	0.462085	0.42331	0.450736	1.76972	0.952938	0.542578	0.747688	0.630715	0.348739	0.223777	0.306293	0.569091	0.669754
NM_001039167.1	Rbfox3	RNA binding protein. fox-1 homolog (C. elegans) 3 (Rbfox3). transcript variant 1. mRNA	0	0	0	0	0	0	0	0	0	0	0	0	0	0	0	0	0	0	0	0
NM_001039168.1	Rbfox3	RNA binding protein. fox-1 homolog (C. elegans) 3 (Rbfox3). transcript variant 2. mRNA	0	0	0	0	0	0	0	0	0	0	0	0	0	0	0	0	0	0	0	0
NM_001039169.1	Eif4e2	eukaryotic translation initiation factor 4E member 2 (Eif4e2). transcript variant 2. mRNA	0	0	0	0	0	0	0	0	0.142426	0	0	0	0.00958	0	0	0	0	0.173901	0	0
NM_001039170.1	Eif4e2	eukaryotic translation initiation factor 4E member 2 (Eif4e2). transcript variant 1. mRNA	0.43084	0.565738	0.635522	0.679271	0.428283	0.173736	5.92649	0.415968	0.372044	0.5515	0.583463	0.734684	0.508642	0.477307	0.241657	0.283849	0.282867	0.206393	0.416635	0.296408
NM_001039173.2	Dok6	docking protein 6 (Dok6). mRNA	0.000866	0.00506	0.033439	0.0142964	0.00194	0	0.0811399	0.001034	0.005788	0	0.005436	0.002007	0.003212	0.001017	0.001168	0.001058	0	0	0.001096	0
NM_001039175.2	Elovl1	elongation of very long chain fatty acids (FEN1/Elo2. SUR4/Elo3. yeast)-like 1 (Elovl1). transcript variant 3. mRNA	0	0	0	0.147365	0	0.0265139	0	0.0447452	0	0	0	0	0	0.0628694	0	0	0	0.120188	0	0.0499058
NM_001039176.2	Elovl1	elongation of very long chain fatty acids (FEN1/Elo2. SUR4/Elo3. yeast)-like 1 (Elovl1). transcript variant 1. mRNA	0	0.0139583	0.141428	0	0	0	0.611747	0	0	0.0828251	0	0	0	0.235529	0	0	0	0	0	0
NM_001039179.2	Bicd2	BICD cargo adaptor 2 (Bicd2). transcript variant 1. mRNA	0	0.335067	0	0	0.392224	0.0441933	0	0.152441	0.253947	0.0935429	0.301766	0.388248	0.404074	0.469139	0.303901	0.166101	0.0802552	0.0570169	0.149498	0.0585022
NM_001039180.2	Bicd2	BICD cargo adaptor 2 (Bicd2). transcript variant 3. mRNA	0.171106	0.0589786	1.94245	1.17694	1.10236	0.0380682	0.936669	0.117017	0.86512	2.02361	2.75892	1.59475	1.44493	0.979396	0.0544712	0.298263	0.734318	0.431412	0	0.209844
NM_001039181.1	Npr3	natriuretic peptide receptor 3 (Npr3). transcript variant 2. mRNA	0	0.003695	0	0	0	0	0	0	0	0	0	0	0.0625367	0	0	0	0	0	0.0112054	0
NM_001039184.1	Cep350	centrosomal protein 350 (Cep350). mRNA	0.0105294	0.556624	0.432822	1.12531	0.780474	0.147411	6.61388	0.007854	0	0.0977907	0.433771	0.0213474	0.009762	0.0185391	0.221083	0.001608	0.0525225	0.138812	0.203233	0
NM_001039185.1	Ceacam1	carcinoembryonic antigen-related cell adhesion molecule 1 (Ceacam1). transcript variant 1. mRNA	1.2892	1.8833	0.0905072	1.12216	0.422631	0.168249	2.78913	0.246174	0.305466	0	1.16538	1.48813	0.353496	1.60956	0.531299	0.180392	0	0	0.0771351	0
NM_001039186.1	Ceacam1	carcinoembryonic antigen-related cell adhesion molecule 1 (Ceacam1). transcript variant 2. mRNA	1.51699	1.47275	1.56995	0.807935	1.76012	0.26189	0.92081	0.72361	0.241003	0.259106	2.20012	2.7822	0.537875	0.468883	0.933529	0	0.162659	0.128053	0.171537	0.424105
NM_001039187.1	Ceacam1	carcinoembryonic antigen-related cell adhesion molecule 1 (Ceacam1). transcript variant 4. mRNA	0.306488	0.964645	0	1.98932	0.0405641	0.231026	0.443788	0.385727	0.152067	0.734906	0.790579	1.28794	0.365084	0.93863	0.484933	0	0.150896	0.0562702	0.151639	0.252194
NM_001039188.1	Rreb1	ras responsive element binding protein 1 (Rreb1). transcript variant 2. mRNA	0	0	0	0	0	0	0	0	0	0	0	0	0	0	0	0	0	0	0	0
NM_001039189.2	Fars2	phenylalanine-tRNA synthetase 2 (mitochondrial) (Fars2). transcript variant 2. mRNA; nuclear gene for mitochondrial product	0.0554691	0.0405154	0.0892412	0.0763077	0.0621197	0.10297	0	0.0330996	0.0386145	0.163135	0.0522311	0.032131	0	0	0.0748381	0	0.118581	0.116691	0	0
NM_001039192.2	Gmfg	glia maturation factor. gamma (Gmfg). transcript variant 2. mRNA	3.4719	6.27495	4.60961	6.31977	6.05436	1.06131	83.7713	3.06142	3.53888	1.04793	5.83408	5.61103	4.03022	5.20166	4.22549	0.821469	1.93294	1.39878	1.17627	0.704021
NM_001039194.3	Aifm2	apoptosis-inducing factor. mitochondrion-associated 2 (Aifm2). transcript variant 3. mRNA	0	0	0	0	0	0	0	0.0397888	0.006189	0	0	0	0.0206061	0	0	0	0	0.006234	0	0
NM_001039195.3	Gria2	glutamate receptor. ionotropic. AMPA2 (alpha 2) (Gria2). transcript variant 3. mRNA	0	0	0.006644	0.007101	0	0	0	0	0	0	0	0	0	0	0	0	0	0	0	0
NM_001039198.1	Zfhx2	zinc finger homeobox 2 (Zfhx2). mRNA	0.0711559	0.203501	0.0941629	0.154414	0.0965225	0.007442	3.10179	0.0765481	0.0334883	0.002482	0.113243	0.127717	0.0656592	0.148223	0.0973547	0.0146911	0.005713	0.0224889	0.0634225	0.002668
NM_001039200.2	Emc1	ER membrane protein complex subunit 1 (Emc1). transcript variant 2. mRNA	0.237631	0.753843	0.5936	0.729246	0.333833	0.0974474	13.0732	0.226543	0.131557	0.0400475	0.594925	0.545713	0.458867	0.503394	0.318711	0.0927534	0.0340673	0.0473285	0.165508	0.0542775
NM_001039201.2	Hdhd2	haloacid dehalogenase-like hydrolase domain containing 2 (Hdhd2). transcript variant 2. mRNA	0	0	0	0	0	0	0	0	0	0	0.101164	0	0	0.0644865	0	0	0	0	0	0
NM_001039202.1	Hdhd2	haloacid dehalogenase-like hydrolase domain containing 2 (Hdhd2). transcript variant 3. mRNA	0	0	0	0	0	0	0.478139	0.0243618	0	0	0	0.0236489	0	0.0359411	0.027541	0	0	0	0	0
NM_001039209.4	Zfp982	zinc finger protein 982 (Zfp982). transcript variant 2. mRNA	0	0	0	0	0	0	0.231419	0	0	0.002781	0	0	0	0	0	0	0	0	0	0
NM_001039214.4	Mex3c	mex3 RNA binding family member C (Mex3c). mRNA	0.553763	0.943778	0.616047	1.16927	0.574487	0.164688	5.16156	0.248472	0.578547	0.281736	1.11833	0.636573	0.620851	0.624811	0.527045	0.146829	0.287545	0.21192	0.268943	0.22856
NM_001039218.2	Spink14	serine peptidase inhibitor. Kazal type 14 (Spink14). mRNA	0	0	0	0	0	0	0	0	0	0	0	0	0	0	0	0	0	0	0	0
NM_001039219.3	Gal3st2c	galactose-3-O-sulfotransferase 2C (Gal3st2c). mRNA	0.0409516	0.110201	0	0.088952	0.0265514	0	3.05604	0.0437289	0	0	0.064945	0.0374552	0.0213145	0.0758982	0	0	0.006144	0	0	0
NM_001039220.3	AI429214	expressed sequence AI429214 (AI429214). mRNA	0.0887253	0.0907287	0.0342589	0.109852	0.0198726	0.0549014	0.443356	0	0.019765	0	0.178231	0.123348	0.0987091	0.0520727	0.0957655	0	0	0	0.0112297	0.0118101
NM_001039223.4	Gm14137	predicted gene 14137 (Gm14137). mRNA; nuclear gene for mitochondrial product	0.0801311	0.13378	0.0920847	0.118109	0.0705088	0.0495835	3.85217	0.0751394	0.0159379	0.0212631	0.0682674	0.116042	0.137967	0.120931	0.0888061	0.0139837	0.0571011	0.0288982	0.0144885	0.0304747
NM_001039228.4	Gm6583	predicted gene 6583 (Gm6583). mRNA	0	0.022632	0	0	0.0173501	0.009587	0.120962	0	0.0258842	0	0	0	0	0.009093	0	0	0	0	0	0
NM_001039231.3	Zfp951	zinc finger protein 951 (Zfp951). transcript variant 1. mRNA	0	0	0	0	0	0	0	0	0	0	0	0	0	0	0	0	0	0	0	0
NM_001039238.2	Dcpp2	demilune cell and parotid protein 2 (Dcpp2). mRNA	0	0	0	0	0	0	0	0	0.0638561	0	0	0	0	0	0	0	0	0	0	0
NM_001039239.2	Zfp808	zinc finger protein 808 (Zfp808). mRNA	0	0.0575139	0.0542927	0.131535	0	0	0	0	0	0	0.074145	0.0325799	0	0	0	0	0	0	0	0
NM_001039240.3	Gm7073	predicted gene 7073 (Gm7073). transcript variant 2. mRNA	0	0	0	0	0	0	0	0	0	0	0	0	0	0	0	0	0	0	0	0
NM_001039242.2	Marchf10	membrane associated ring-CH-type finger 10 (Marchf10). transcript variant 2. mRNA	0	0	0	0	0	0	0	0	0	0	0	0	0	0	0	0	0	0	0	0
NM_001039243.4	Erich4	glutamate rich 4 (Erich4). mRNA	0	0	0	0	0	0	0.156821	0	0	0	0	0	0	0	0	0	0	0	0	0
NM_001039244.4	Tmem267	transmembrane protein 267 (Tmem267). transcript variant 1. mRNA	0.0595389	0	0	0	0.111129	0	0.402883	0.0769777	0.0331581	0.147456	0	0.0804732	0.0735984	0.0524149	0	0	0	0.055668	0	0.0132086
NM_001039347.2	Kcnd3	potassium voltage-gated channel. Shal-related family. member 3 (Kcnd3). transcript variant 1. mRNA	0	0	0.008888	0.003167	0	0.002849	0.0359437	0	0	0	0	0	0.002845	0	0	0	0	0	0	0
NM_001039351.2	Nolc1	nucleolar and coiled-body phosphoprotein 1 (Nolc1). transcript variant 2. mRNA	0.105306	0.657293	0.708491	0.0790188	0.458328	0.352465	4.85101	0	0.951676	0.27266	0.156251	0.69318	0.508859	0.474768	0.390714	0.154952	0.613971	0.0161116	0.321092	0.656259
NM_001039352.2	Nolc1	nucleolar and coiled-body phosphoprotein 1 (Nolc1). transcript variant 3. mRNA	0	0	0.255254	0.006574	0.0160553	0	1.64172	0	0	0	0.0899971	0.0941181	0.0295364	0.0841403	0.148293	0.0642146	0.762802	0	0	0.111318
NM_001039353.2	Nolc1	nucleolar and coiled-body phosphoprotein 1 (Nolc1). transcript variant 4. mRNA	0.633712	0.496059	0.0430902	1.17115	0.216925	0.757622	3.21891	0.30252	0.577996	0.417539	0.891701	0.706464	0.564608	0.451923	0.200037	0.184038	0.865671	0.426608	0.587177	0.385157
NM_001039354.1	Lin7a	lin-7 homolog A (C. elegans) (Lin7a). transcript variant 1. mRNA	0	0	0	0	0	0	0	0	0	0	0	0	0	0	0	0	0	0	0	0
NM_001039356.2	Hmga1	high mobility group AT-hook 1 (Hmga1). transcript variant 3. mRNA	0.151323	0.206795	0	0	0.0765329	0	0	0	0	0	0.0612856	0	0	0	0	0	0	0.104059	0.0123564	0
NM_001039363.2	Tsc2	TSC complex subunit 2 (Tsc2). transcript variant 2. mRNA	0	0	0.0183659	0	0	0	0	0	0	0	0.0107492	0	0	0	0	0	0	0	0	0
NM_001039365.3	Mobp	myelin-associated oligodendrocytic basic protein (Mobp). transcript variant 3. mRNA	0	0	0	0.0158932	0	0	0	0	0	0	0	0	0	0	0	0	0	0	0	0
NM_001039368.2	Polr2k	polymerase (RNA) II (DNA directed) polypeptide K (Polr2k). transcript variant 1. mRNA	0.209837	0.0817427	0.180051	0.230934	0.0626654	0.155811	0.917477	0.0333904	0.249304	0.0346459	0.245887	0.09724	0.172925	0.0656814	0.207613	0	0.159497	0.0941732	0	0.111724
NM_001039371.2	Slc22a15	solute carrier family 22 (organic anion/cation transporter). member 15 (Slc22a15). mRNA	0.131865	0.127138	0.118805	0.195917	0.410538	0.0261106	5.57616	0.166816	0.0734378	0.0359241	0.170524	0.0458306	0.0782419	0.176453	0.165457	0.0225517	0.0187933	0.0414262	0.0216968	0.0140419
NM_001039373.5	Mtcp1	mature T cell proliferation 1 (Mtcp1). mRNA	0.241023	0.297324	0.110299	0.537881	0.317907	0.0795416	9.08306	0.0830982	0.149144	0.179078	0.376575	0.124102	0.23173	0.22633	0.15898	0.0392571	0.0839677	0.0480754	0.0813484	0.0855528
NM_001039376.2	Pde4dip	phosphodiesterase 4D interacting protein (myomegalin) (Pde4dip). transcript variant 1. mRNA	0.00832	0.0395025	0.028111	0.0643846	0.0174712	0.021881	0.298831	0.0136536	0.001158	0.009015	0.0287271	0.0228934	0.0359979	0.0207536	0.008419	0.0406558	0	0	0.0842468	0.0263034
NM_001039385.1	Vgf	VGF nerve growth factor inducible (Vgf). mRNA	0	0	0.00883	0	0	0	0	0	0	0	0	0	0	0	0	0	0	0	0	0
NM_001039386.1	Nsmf	NMDA receptor synaptonuclear signaling and neuronal migration factor (Nsmf). transcript variant 1. mRNA	0.0950254	0	0.0840846	0.0163405	0	0	0.704837	0.0708796	0	0	0	0.0137611	0	0.0975979	0.0841358	0	0	0	0.007517	0
NM_001039387.1	Nsmf	NMDA receptor synaptonuclear signaling and neuronal migration factor (Nsmf). transcript variant 2. mRNA	0.136878	0.408603	0.275747	0.0245608	0.253259	0.0441898	2.2861	0	0	0	0.134491	0	0.194947	0.115261	0	0	0	0	0.0527258	0
NM_001039388.2	Wdr37	WD repeat domain 37 (Wdr37). transcript variant 2. mRNA	0	0	0	0	0	0	0.0944309	0	0	0	0	0.144496	0	0	0	0	0	0	0	0
NM_001039389.2	Wdr37	WD repeat domain 37 (Wdr37). transcript variant 3. mRNA	0.066796	0.137954	0.118581	0.164768	0.0593278	0.0484583	5.33755	0.112704	0.10262	0.0114089	0.0983213	0.0693792	0.153749	0.0973302	0.0559367	0.033764	0.0656531	0.028427	0.0262371	0.0275931
NM_001039390.2	Pkig	protein kinase inhibitor. gamma (Pkig). transcript variant 2. mRNA	0.668898	0.79744	0.752071	0.380768	0.473567	0.285449	2.18508	0.330328	0.205528	0.285623	0.540562	0.766025	0.874371	0.63173	0.757243	0.394467	0.273939	0.370933	0.564404	0.58334
NM_001039391.2	Pkig	protein kinase inhibitor. gamma (Pkig). transcript variant 3. mRNA	3.00223	4.85954	2.84723	3.53518	2.40289	2.37747	9.89571	2.77905	1.56546	2.24504	3.0384	4.11403	3.86537	4.17804	3.00706	2.82424	1.84899	2.54733	3.73668	1.66048
NM_001039392.2	Tmsb10	thymosin. beta 10 (Tmsb10). transcript variant 2. mRNA	0.419673	0.735685	0.252071	0.250179	0.203663	0.0346247	14.9855	0.267123	0.140233	0	0.26345	0.745507	0.518775	0.361248	0.188739	0.0341775	0.0797486	0.14126	0.159351	0
NM_001039394.1	Rab43	RAB43. member RAS oncogene family (Rab43). transcript variant 1. mRNA	1.66206	2.80023	1.32415	1.03074	0.949834	0.505987	8.19596	1.05987	2.15203	0.89014	2.46872	2.01586	1.98871	1.56475	1.28798	1.03375	0.520366	1.02841	1.22992	0.804949
NM_001039466.1	Trim46	tripartite motif-containing 46 (Trim46). transcript variant 3. mRNA	0	0	0	0	0	0.0238101	0.0801158	0.0153075	0	0.0158831	0.0483104	0.0594383	0	0.0188194	0	0.0313367	0	0	0.0324679	0
NM_001039472.2	Kif21b	kinesin family member 21B (Kif21b). transcript variant 1. mRNA	3.23027	4.82692	3.68288	5.19833	3.17223	0.186629	159.859	2.32593	0.425809	0.210532	5.18438	4.35438	3.05743	4.63616	2.65538	0.217072	0.172487	0.13148	0.198162	0.0536992
NM_001039474.1	Tcerg1	transcription elongation regulator 1 (CA150) (Tcerg1). transcript variant 1. mRNA	0	0	0.217294	0.005465	0	0.137651	5.60142	0.0900761	0.559711	0.0836248	0.473799	0.326751	0.00491	0.568862	0.0160786	0	0	0	0	0
NM_001039478.1	Lrif1	ligand dependent nuclear receptor interacting factor 1 (Lrif1). transcript variant 3. mRNA	0	0	0	0	0.133844	0	0	0	0.048407	0.0807258	0.163692	0	0.0134306	0.312455	0.0439767	0	0.154847	0.0670468	0	0.0289245
NM_001039482.1	Klhl20	kelch-like 20 (Klhl20). mRNA	0.425169	0.944324	0.85155	0.877344	0.524732	0.096644	17.6549	0.199342	0.384168	0.0859582	0.691761	0.665971	0.34591	0.875904	0.348277	0.0847961	0.0741976	0.0632798	0.0768749	0.684322
NM_001039483.1	Tmco1	transmembrane and coiled-coil domains 1 (Tmco1). mRNA	0.452148	0.955024	0.430793	0.977444	0.32442	0.176831	4.07126	0.154175	0.294321	0.128462	0.754438	0.693895	0.54682	0.56749	0.443659	0.164982	0.20643	0.131767	0.195712	0.179773
NM_001039484.1	Kcnj10	potassium inwardly-rectifying channel. subfamily J. member 10 (Kcnj10). mRNA	0.006478	0.002366	0.0208455	0.006684	0	0	0.161862	0	0	0	0.002033	0	0.004004	0.001901	0	0.003957	0	0	0	0
NM_001039485.4	Piezo2	piezo-type mechanosensitive ion channel component 2 (Piezo2). mRNA	0.0008152	0	0	0	0	0	0.0458287	0	0	0	0	0	0	0	0	0	0.001162	0	0	0
NM_001039488.1	Lrif1	ligand dependent nuclear receptor interacting factor 1 (Lrif1). transcript variant 1. mRNA	0.0519714	0.0986977	0.0367902	0	0.142596	0	0	0	0	0	0.316463	0.36427	0.167034	0.173861	0.0210357	0	0	0	0	0
NM_001039493.1	Plekhm3	pleckstrin homology domain containing. family M. member 3 (Plekhm3). mRNA	0.189217	0.50651	0.340952	0.288443	0.0755981	0.0759464	3.27735	0.18798	0.126454	0.0303971	0.426328	0.0912397	0.233899	0.169278	0.325667	0.0262379	0	0	0	0
NM_001039494.2	Catsperz	cation channel sperm associated auxiliary subunit zeta (Catsperz). mRNA	0.0224256	0	0	0	0	0	0.0350186	0	0	0	0	0	0.0138606	0.026323	0	0	0	0	0	0
NM_001039495.1	Cfap65	cilia and flagella associated protein 65 (Cfap65). mRNA	0	0	0	0	0	0	0	0	0	0	0	0	0	0	0	0	0	0	0	0
NM_001039501.2	Wfdc10	WAP four-disulfide core domain 10 (Wfdc10). mRNA	0	0	0	0	0	0	0	0	0	0	0	0	0	0	0	0	0	0	0	0
NM_001039502.2	Krtap1-4	keratin associated protein 1-4 (Krtap1-4). mRNA	0	0	0	0	0	0	0	0	0	0	0	0	0	0	0	0	0	0	0	0
NM_001039507.2	Lipe	lipase. hormone sensitive (Lipe). transcript variant 2. mRNA	0	0	0	0	0	0	0.579398	0	0	0	0	0	0	0.169781	0	0	0	0	0.119394	0
NM_001039509.1	Pnkd	paroxysmal nonkinesiogenic dyskinesia (Pnkd). transcript variant 3. mRNA	0.0237001	0.0605881	0.114389	0.0570565	0	0	1.40634	0.0671762	0.0230981	0	0.0297555	0.0617783	0.0512691	0.0625929	0.0519607	0.007238	0.0337772	0.0265911	0.0337461	0.007887
NM_001039510.2	Adora1	adenosine A1 receptor (Adora1). transcript variant 1. mRNA	0	0	0	0.009595	0	0	0	0	0	0	0	0	0	0	0	0	0	0	0	0
NM_001039511.1	Ivns1abp	influenza virus NS1A binding protein (Ivns1abp). transcript variant 1. mRNA	0.103468	0.302299	0.286521	0.500344	0.0772492	0.283258	36.1723	0.145935	0.153662	0	0.30311	0.0871783	0.14728	0.11041	0	0.0957533	0.120651	0.0422144	0.0952414	0.0918169
NM_001039512.1	Ivns1abp	influenza virus NS1A binding protein (Ivns1abp). transcript variant 3. mRNA	0.0568816	0.162412	0	0.106706	0.104239	0	31.5323	0.290054	0.112314	0	0.262936	0	0	0.109256	0	0	0	0	0	0.15487
NM_001039514.1	Dhps	deoxyhypusine synthase (Dhps). mRNA	0.940148	2.05529	0.939264	1.77269	1.03814	0.292907	19.8962	0.282465	0.563858	0.219814	1.08956	1.71375	1.1459	1.4894	0.647523	0.0963744	0.374795	0.331939	0.216349	0.105014
NM_001039515.1	Arl4a	ADP-ribosylation factor-like 4A (Arl4a). transcript variant 2. mRNA	0.543026	0.460719	0.244163	0.094602	0.46473	0.0234769	0.33326	0.3396	0.182244	0.15563	0.416802	0.2445	0.196394	0.35071	0.14077	0.283878	0.0675909	0.284679	0.243104	0.167289
NM_001039519.2	Gtf2a2	general transcription factor II A. 2 (Gtf2a2). transcript variant 2. mRNA	1.05673	2.2155	1.3475	1.53449	0.942362	0.254289	2.87247	0.490447	1.01355	0.496772	1.73212	1.56431	1.56027	0.964747	1.04289	0.274909	0.766968	0.680642	0.557282	0.560036
NM_001039520.2	Dnm2	dynamin 2 (Dnm2). transcript variant 2. mRNA	0	0	0	0	0.043843	0	1.54362	0.0788439	0	0	0	0	0	0	0	0	0	0	0.0309688	0
NM_001039521.1	Rrn3	RRN3 RNA polymerase I transcription factor homolog (yeast) (Rrn3). mRNA	0.599674	0.99306	0.849946	1.01533	0.388805	0.273417	5.52754	0.0956168	0.486754	0.132283	0.758987	0.677858	0.804304	0.880581	0.465135	0.174981	0.186847	0.185231	0.463998	0.206826
NM_001039522.1	Leo1	Leo1. Paf1/RNA polymerase II complex component (Leo1). mRNA	0.367546	0.647808	0.524479	0.675999	0.299762	0.326313	6.15115	0.386199	1.05906	0.168203	0.611928	0.684998	0.676569	0.698719	0.312625	0.312338	0.478273	0.385486	0.490475	0.223347
NM_001039530.3	Parp14	poly (ADP-ribose) polymerase family. member 14 (Parp14). mRNA	0.934776	1.45729	1.45028	1.76777	1.69606	4.51527	34.2181	0.897959	9.81858	4.91136	1.55117	1.66361	0.822594	1.31838	0.695771	2.61575	3.35468	3.4933	5.91713	2.81809
NM_001039532.2	Zfp784	zinc finger protein 784 (Zfp784). mRNA	0.269326	0.470935	0.210087	0.415416	0.219358	0	9.29069	0.194803	0.0909041	0.0353724	0.389372	0.274199	0.332925	0.344873	0.286293	0.044864	0.0581578	0.0183139	0.0568131	0.0434541
NM_001039533.2	Pdxdc1	pyridoxal-dependent decarboxylase domain containing 1 (Pdxdc1). transcript variant 3. mRNA	0	0.18881	0.0784682	0	0	0	2.88652	0.0291039	0.0217299	0.0815351	0	0.0536792	0.162783	0.0801493	0	0.0327689	0.0625597	0	0	0.0292145
NM_001039534.1	Pstk	phosphoseryl-tRNA kinase (Pstk). transcript variant 1. mRNA	0.263491	0.837755	0.269311	0.437106	0	0	1.88784	0.0554931	0.120846	0	0.262704	0.412998	0.574784	0.500312	0.595982	0	0	0.0695604	0.0588516	0
NM_001039536.4	Pigl	phosphatidylinositol glycan anchor biosynthesis. class L (Pigl). transcript variant 1. mRNA	0.202107	0.281823	0.195095	0.252758	0.282923	0.0824256	11.0747	0.183643	0.0716266	0.036972	0.279696	0.239466	0.173179	0.291148	0.145636	0.0420832	0.0130927	0.0489595	0.0784842	0.0213994
NM_001039537.2	Lif	leukemia inhibitory factor (Lif). transcript variant 2. mRNA	0	0	0	0	0	0	0.119663	0	0.137514	0	0	0	0	0	0	0	0	0	0	0
NM_001039543.2	Mlf1	myeloid leukemia factor 1 (Mlf1). transcript variant 1. mRNA	0	0	0	0	0	0	0	0	0	0	0	0	0	0	0	0	0	0	0	0
NM_001039544.2	Mup3	major urinary protein 3 (Mup3). transcript variant 1. mRNA	0	0	0	0	0	0	0	0.0457884	0	0	0	0	0	0	0	0	0	0	0	0.0255347
NM_001039545.2	Myh2	myosin. heavy polypeptide 2. skeletal muscle. adult (Myh2). mRNA	0	0	0	0	0	0	0	0	0	0	0	0	0	0	0	0.209273	0	0	0	0
NM_001039546.2	Myo6	myosin VI (Myo6). mRNA	0.006678	0.0162592	0	0.0336853	0.0174504	0.0330581	0.225943	0.025238	0.0904986	0.0372131	0.025153	0.025789	0.0577852	0.007839	0.0435482	0.0829374	0.0539327	0.0686829	0.0380351	0.0622237
NM_001039551.2	Cnnm3	cyclin M3 (Cnnm3). transcript variant 2. mRNA	0	0	0	0.0773999	0	0	0	0	0	0	0	0	0	0	0.0424199	0	0	0.0129966	0	0.0374455
NM_001039552.3	Ermard	ER membrane associated RNA degradation (Ermard). transcript variant 1. mRNA	0	0	0	0	0	0	0	0	0	0	0	0	0	0	0	0	0	0	0	0
NM_001039553.2	4930467E23Rik	RIKEN cDNA 4930467E23 gene (4930467E23Rik). mRNA	0	0	0	0	0	0	0.0844774	0	0	0	0	0	0	0	0	0	0	0	0	0
NM_001039554.3	Angptl7	angiopoietin-like 7 (Angptl7). mRNA	0.008494	0.241958	0.0601275	0.0525818	0.0190245	0.031535	2.08239	0.0405478	0.0141911	0	0.0319922	0.0344411	0.0577478	0.0199401	0.0171897	0	0	0.0238249	0	0
NM_001039555.2	Cyp2c68	cytochrome P450. family 2. subfamily c. polypeptide 68 (Cyp2c68). mRNA	0	0	0	0	0	0	0	0	0	0	0	0	0	0	0	0	0	0	0	0
NM_001039556.3	Rad54b	RAD54 homolog B (S. cerevisiae) (Rad54b). transcript variant 1. mRNA	0.0389208	0.0349887	0.0269737	0.0700172	0.0134115	0.0148206	1.51474	0	0.0200082	0.0481963	0.0526239	0.0173425	0.0222053	0.0105427	0.0363541	0.0146291	0	0.0167956	0.007579	0.00797
NM_001039557.4	Mroh8	maestro heat-like repeat family member 8 (Mroh8). mRNA	0	0	0	0	0	0	0	0	0	0	0	0	0	0	0	0	0	0	0	0
NM_001039558.2	Smco3	single-pass membrane protein with coiled-coil domains 3 (Smco3). mRNA	0	0	0	0.0117418	0	0	0.106626	0.0101864	0	0	0	0	0	0	0	0	0.0121644	0	0	0
NM_001039560.3	Gcnt7	glucosaminyl (N-acetyl) transferase family member 7 (Gcnt7). mRNA	0.0236681	0	0	0.0108532	0	0.009764	0.0985569	0	0	0	0	0	0	0	0	0	0	0	0	0
NM_001039562.1	Ankrd37	ankyrin repeat domain 37 (Ankrd37). mRNA	0.218692	0.416702	0.293711	0.392413	0.106484	0	1.90051	0	0	0.0235487	0.298443	0.462656	0.317348	0.513399	0.166771	0	0	0.0213364	0	0
NM_001039563.3	Spag11b	sperm associated antigen 11B (Spag11b). transcript variant 2. mRNA	0	0	0	0	0	0	0	0	0	0	0	0	0	0	0	0	0	0	0	0
NM_001039566.2	Defb30	defensin beta 30 (Defb30). mRNA	0	0	0	0	0	0	0	0	0	0	0	0	0	0	0	0	0	0	0	0
NM_001039578.4	Evi5l	ecotropic viral integration site 5 like (Evi5l). transcript variant 1. mRNA	0.005961	0.0435423	0.0652178	0.0205022	0.0333803	0	0.428209	0	0	0	0.0299378	0.006906	0.103166	0.0209921	0.0522791	0	0	0.0200655	0.0264078	0
NM_001039581.2	Abca3	ATP-binding cassette. sub-family A (ABC1). member 3 (Abca3). transcript variant 2. mRNA	0.437723	1.06044	0.906312	0.738683	0.802292	0.12281	7.77352	0.115187	0.186238	0.0622841	0.788501	1.23786	0.537726	1.026	0.150394	0.086351	0	0	0	0.126663
NM_001039586.1	Glyctk	glycerate kinase (Glyctk). transcript variant 2. mRNA	0	0	0	0	0	0	0	0	0	0	0	0	0	0	0	0	0	0	0	0
NM_001039593.2	Spata46	spermatogenesis associated 46 (Spata46). mRNA	0	0	0	0	0	0	0.941839	0	0	0	0	0	0	0	0	0	0	0	0	0
NM_001039594.1	Lce3a	late cornified envelope 3A (Lce3a). mRNA	0.0983953	0.225875	0.199009	0.48343	0.157418	0.12177	2.06329	0.083878	0.0939391	0.174064	0.158831	0.0977083	0.191133	0.395986	0.0379296	0.154539	0.0600995	0.0788556	0.0711635	0.187104
NM_001039595.2	Gm13043	predicted gene 13043 (Gm13043). mRNA	0	0	0	0	0	0	0	0	0	0	0	0	0	0	0	0	0	0	0	0
NM_001039644.2	Edem3	ER degradation enhancer. mannosidase alpha-like 3 (Edem3). transcript variant 1. mRNA	0.517157	1.03636	0.409612	0.8063	0.397988	0	12.1425	0.20415	0.265857	0.141217	0.702565	0.600673	0.581906	0.614819	0.296987	0.11987	0	0.11456	0	0.0600126
NM_001039645.2	Asphd1	aspartate beta-hydroxylase domain containing 1 (Asphd1). transcript variant 2. mRNA	0	0.0229672	0.0809419	0	0	0	0	0	0	0	0	0	0	0	0	0	0.0448139	0	0	0
NM_001039646.2	Gbp10	guanylate-binding protein 10 (Gbp10). mRNA	0.0620549	0.384362	0.166128	0.280006	0.197366	1.57587	16.0547	0.322897	1.82197	1.24487	0.006233	0.178292	0.0736401	0.116544	0.117213	0.639792	0.997604	0.67675	1.57711	1.05068
NM_001039648.3	Gm20767	predicted gene. 20767 (Gm20767). mRNA	0	0.0448239	0.0394925	0	0	0	0	0	0	0.0455957	0.007705	0	0	0	0	0	0	0	0	0
NM_001039652.2	Oprm1	opioid receptor. mu 1 (Oprm1). transcript variant MOR-1C. mRNA	0	0	0	0	0	0	0	0	0	0	0	0	0	0	0	0	0	0	0	0
NM_001039653.2	Lhx3	LIM homeobox protein 3 (Lhx3). transcript variant 1. mRNA	0	0	0	0	0	0	0	0	0	0	0	0	0	0	0	0	0	0	0	0
NM_001039655.1	Rasgrf1	RAS protein-specific guanine nucleotide-releasing factor 1 (Rasgrf1). transcript variant 2. mRNA	0	0	0	0	0.0196143	0	0	0	0	0	0	0	0	0	0	0	0	0	0	0
NM_001039657.2	Tesmin	testis expressed metallothionein like (Tesmin). transcript variant 1. mRNA	0	0.0114528	0	0.026963	0	0	0	0	0.026197	0	0	0	0	0.0184049	0	0	0	0	0	0
NM_001039658.2	Tesmin	testis expressed metallothionein like (Tesmin). transcript variant 2. mRNA	0.008598	0	0	0	0	0	0.0537055	0	0	0	0	0	0	0	0	0.0210065	0	0	0	0
NM_001039666.3	Krt40	keratin 40 (Krt40). transcript variant 1. mRNA	0	0	0	0	0	0	0	0	0	0	0	0	0	0	0	0	0	0	0	0
NM_001039669.3	Iffo1	intermediate filament family orphan 1 (Iffo1). transcript variant 1. mRNA	0.320832	0	0.133712	0	0.18136	0	0.648908	0.0692857	0	0.0454048	0.237846	0.410629	0.256841	0.150636	0	0.0895818	0	0.0685653	0.116019	0
NM_001039676.2	Slc39a2	solute carrier family 39 (zinc transporter). member 2 (Slc39a2). mRNA	0	0	0	0	0	0	0.0468715	0	0	0	0	0	0	0	0	0	0	0	0	0
NM_001039677.2	Slc30a2	solute carrier family 30 (zinc transporter). member 2 (Slc30a2). transcript variant 1. mRNA	0	0	0	0	0	0	0	0	0	0	0	0	0	0	0	0	0	0	0	0
NM_001039678.2	Urad	ureidoimidazoline (2-oxo-4-hydroxy-4-carboxy-5) decarboxylase (Urad). mRNA	0	0	0	0	0	0	0	0	0	0	0	0	0	0	0	0	0	0	0	0
NM_001039683.2	Eif4e1b	eukaryotic translation initiation factor 4E family member 1B (Eif4e1b). transcript variant 2. mRNA	0	0	0	0	0	0	0	0	0	0	0	0	0	0	0	0	0	0	0	0
NM_001039684.3	Mks1	MKS transition zone complex subunit 1 (Mks1). mRNA	0.261045	0.437272	0.264308	0.36869	0.144223	0	12.9465	0.216003	0.0891663	0	0.297152	0.431461	0.232335	0.396295	0.216015	0.0212591	0.0297631	0	0	0.0555957
NM_001039688.3	Rhox4a	reproductive homeobox 4A (Rhox4a). mRNA	0	0	0	0	0	0	0	0	0	0	0	0	0	0	0	0	0	0	0	0
NM_001039689.1	Rhox4c	reproductive homeobox 4C (Rhox4c). mRNA	0	0	0	0	0	0	0	0	0	0	0	0	0	0	0	0	0	0	0	0
NM_001039692.1	Arhgap12	Rho GTPase activating protein 12 (Arhgap12). transcript variant 1. mRNA	0.0139169	0.236338	0.127623	0	0	0	1.83634	0.0435986	0.0426278	0	0.008736	0	0.0580607	0.0408389	0.009388	0.0637519	0	0	0.0660532	0
NM_001039695.1	Rhox4d	reproductive homeobox 4D (Rhox4d). mRNA	0	0	0	0	0	0	0	0	0	0	0	0	0	0	0	0	0	0	0	0
NM_001039696.1	Rhox4f	reproductive homeobox 4F (Rhox4f). mRNA	0	0	0	0	0	0	0	0	0	0	0	0	0	0	0	0	0	0	0	0
NM_001039698.1	Rhox4g	reproductive homeobox 4G (Rhox4g). mRNA	0	0	0	0	0	0	0	0	0	0	0	0	0	0	0	0	0	0	0	0
NM_001039700.3	Pkd1l3	polycystic kidney disease 1 like 3 (Pkd1l3). transcript variant 1. mRNA	0	0	0	0	0	0	0	0	0.0111954	0	0	0	0	0	0	0	0.0179063	0	0	0
NM_001039701.3	Il1rn	interleukin 1 receptor antagonist (Il1rn). transcript variant 2. mRNA	0.367237	0.53647	0.931689	0.548919	3.476	8.12816	33.6466	6.27494	24.9435	7.23673	1.55166	0.613632	0.209518	0.812384	1.13387	3.42926	5.10801	10.59	8.41558	4.32421
NM_001039710.1	Coq10b	coenzyme Q10B (Coq10b). transcript variant 1. mRNA; nuclear gene for mitochondrial product	0.150295	0.614754	0.367538	0.882165	0.347851	0.173599	4.67821	0.633769	0.524529	0.130279	0.540926	0.458515	0.346799	0.393995	0.270368	0.0734386	0.314158	0.146144	0.177542	0.0866907
NM_001039723.2	Tmem120b	transmembrane protein 120B (Tmem120b). mRNA	0	0	0	0	0	0.0699196	0	0	0.11537	0.0116604	0	0	0	0.0607906	0	0.0115028	0.0134201	0.0686722	0.0595899	0.0752037
NM_001039824.3	Fdx2	ferredoxin 2 (Fdx2). transcript variant 1. mRNA; nuclear gene for mitochondrial product	0.49917	0.824315	0.335202	0.179139	0.194441	0.349165	1.93175	0	0.338429	0	0.245234	0.72916	0.40242	0.242012	0.0585629	0	0.154655	0	0.178548	0
NM_001039878.2	Strn4	striatin. calmodulin binding protein 4 (Strn4). transcript variant 2. mRNA	0.482251	1.33672	0.798944	1.39489	0.299116	0.321362	8.98264	0.360081	0.360852	0.0765615	0.810393	1.87379	0.73064	0.998595	0.106773	0.235642	0.18328	0.435636	0.0939033	0.154719
NM_001039889.3	Smok3b	sperm motility kinase 3B (Smok3b). mRNA	0	0	0	0	0	0	0.0351989	0	0	0	0	0	0	0.00441	0	0	0	0	0	0
NM_001039934.1	Map2	microtubule-associated protein 2 (Map2). transcript variant 1. mRNA	0	0	0	0	0	0	0	0	0	0	0	0	0	0	0	0	0	0	0	0
NM_001039939.2	Asxl1	additional sex combs like 1 (Asxl1). mRNA	0.590316	0.630319	0.262382	0.566051	1.09528	0.40397	21.9437	0.346284	0.483382	0.0247796	1.25617	0.59261	0.516364	0.783928	0.269982	0.261251	0.0855572	0.0715646	0.650587	0.289666
NM_001039951.2	Zfp606	zinc finger protein 606 (Zfp606). transcript variant 2. mRNA	0.0603424	0.225884	0.111644	0.207529	0.0168943	0	2.16723	0	0.008401	0	0.246219	0.0873848	0.139859	0.141659	0.0356182	0	0	0.0169258	0.0286401	0.0100401
NM_001039959.2	Ahnak	AHNAK nucleoprotein (desmoyokin) (Ahnak). transcript variant 3. mRNA	0	0.0485954	0	0.0228814	0.130389	0.0411683	0.597379	0.0397007	0.0370523	0	0.125295	0.105982	0.0822419	0.0390471	0	0	0.14223	0.0746469	0.0842068	0
NM_001039965.1	Zfp869	zinc finger protein 869 (Zfp869). transcript variant 2. mRNA	0.677215	0.869137	0.656367	1.35784	0.589534	0.237517	8.1004	0.0981641	0.598556	0.190129	1.00859	0.559044	0.735456	0.254243	0.702838	0	0.293065	0	0.222091	0.0583923
NM_001039967.1	Zfp869	zinc finger protein 869 (Zfp869). transcript variant 1. mRNA	0	0.209209	0	0	0	0	6.70072	0	0	0	0	0	0	0	0	0.058315	0	0	0	0
NM_001040005.3	Rnf213	ring finger protein 213 (Rnf213). mRNA	0.56304	1.00732	0.773795	0.921995	0.428561	3.45616	8.25336	0.228353	3.96368	2.77529	0.817821	0.818244	0.273358	0.716736	0.355489	0.832763	1.7755	1.67403	4.6357	2.09597
NM_001040026.1	Sco1	SCO1 cytochrome c oxidase assembly protein (Sco1). mRNA; nuclear gene for mitochondrial product	0	0.11358	0.147473	0.202661	0.0343708	0.108882	1.78922	0.114768	0.325893	0.0988137	0.215783	0.151707	0.134049	0.153707	0	0.0774823	0.137054	0	0.137252	0.0571935
NM_001040027.3	Defb41	defensin beta 41 (Defb41). transcript variant 2. mRNA	0	0	0	0	0	0	0	0	0	0	0	0	0	0	0	0	0	0	0	0
NM_001040055.1	Spint5	serine protease inhibitor. Kunitz type 5 (Spint5). mRNA	0	0	0	0	0	0	0	0	0	0	0	0	0	0	0	0	0	0	0	0
NM_001040072.1	Nynrin	NYN domain and retroviral integrase containing (Nynrin). mRNA	0.0259577	0.0361961	0.0577074	0.0697957	0.007928	0.00292	0.184246	0.002816	0.002628	0	0.0444407	0.060145	0.0116681	0.0415487	0.0413894	0.002883	0.003363	0.002648	0.002987	0.003141
NM_001040085.2	Sytl2	synaptotagmin-like 2 (Sytl2). transcript variant 2. mRNA	0.12587	0.451572	0.309713	0.257188	0.283995	0	1.80943	0.0927818	0.0432962	0	0.204508	0.225167	0.137287	0.217272	0	0	0	0	0	0
NM_001040087.2	Sytl2	synaptotagmin-like 2 (Sytl2). transcript variant 4. mRNA	0	0	0	0	0	0.02951	0	0	0	0	0	0	0	0	0	0	0	0	0	0
NM_001040088.2	Sytl2	synaptotagmin-like 2 (Sytl2). transcript variant 5. mRNA	0	0	0	0.037831	0	0	0	0	0	0	0	0	0	0	0.0577149	0	0	0	0	0
NM_001040089.3	Rhox3f	reproductive homeobox 3F (Rhox3f). mRNA	0	0	0	0	0	0	0	0	0	0	0	0	0	0	0	0	0	0	0	0
NM_001040106.3	Aak1	AP2 associated kinase 1 (Aak1). transcript variant 1. mRNA	0	0	0	0	0	0	0	0.007844	0	0	0	0	0	0	0	0	0	0	0	0
NM_001040111.1	Arap1	ArfGAP with RhoGAP domain. ankyrin repeat and PH domain 1 (Arap1). transcript variant 3. mRNA	0.36457	0.644349	0.623708	0.967976	1.08875	0.189383	5.55706	0.2453	0.287423	0.22294	1.33925	0.91251	0	0.408559	0.518187	0.100799	0	0.0504989	0.176595	0.233651
NM_001040112.1	Arap1	ArfGAP with RhoGAP domain. ankyrin repeat and PH domain 1 (Arap1). transcript variant 4. mRNA	0.003296	0	0.0784782	0.0453409	0	0.0224338	1.53372	0	0.0495593	0.0224475	0	0.003818	0	0	0	0.11072	0	0.003698	0	0.0394841
NM_001040130.3	Tmem141	transmembrane protein 141 (Tmem141). transcript variant 1. mRNA	0	0.443313	0	0.178917	0	0.0536512	0	0.0517386	0.0482872	0	0.108858	0.0251123	0	0	0.146226	0.0264791	0.0308927	0.0486406	0.0685874	0
NM_001040131.2	Eif4g2	eukaryotic translation initiation factor 4. gamma 2 (Eif4g2). transcript variant 2. mRNA	1.655	2.45448	2.38366	4.81977	2.26772	1.0418	25.1998	2.76521	2.08067	1.13888	4.85024	2.53701	1.31385	2.00178	1.23775	1.03534	0.829215	1.27476	1.35973	1.12358
NM_001040136.2	Pdzd9	PDZ domain containing 9 (Pdzd9). transcript variant 1. mRNA	0	0	0	0	0	0	0	0	0	0	0	0	0	0	0	0	0	0	0	0
NM_001040137.3	Pdzd9	PDZ domain containing 9 (Pdzd9). transcript variant 2. mRNA	0	0	0	0	0	0	0	0	0	0	0	0.0439511	0	0	0	0	0	0	0	0
NM_001040187.1	Ddx17	DEAD box helicase 17 (Ddx17). transcript variant 4. mRNA	1.33765	2.61975	2.32707	2.53024	1.84578	0.534373	0	0.392523	0.800214	0.755406	2.95513	2.31389	2.00557	1.75345	1.06846	0	0.421609	0.434989	0.530232	0.633456
NM_001040395.4	Nadk2	NAD kinase 2. mitochondrial (Nadk2). transcript variant 2. mRNA; nuclear gene for mitochondrial product	1.44205	2.46523	2.488	3.41345	1.5669	0.943934	4.9652	1.5361	1.35133	1.18654	3.95316	1.67617	2.04481	2.48725	1.65617	0.885155	0.652228	1.18472	1.46013	1.33571
NM_001040396.3	Selenot	selenoprotein T (Selenot). mRNA	3.56423	6.46217	5.33633	7.45197	3.77617	1.16902	16.6287	1.96705	2.82289	1.51945	5.88398	4.21666	3.62642	4.70092	2.58178	1.85579	1.39831	1.93121	2.58836	1.6268
NM_001040397.4	Filip1l	filamin A interacting protein 1-like (Filip1l). transcript variant 1. mRNA	0	0	0	0	0	0	0.533684	0	0.009887	0	0.0362216	0	0	0	0	0	0	0	0	0
NM_001040398.2	Setd1b	SET domain containing 1B (Setd1b). mRNA	0.51054	0.949213	0.917657	0.926489	0.56954	0	11.8552	0.305239	0.098992	0	1.12823	0.972437	0.68725	0.880937	0.671493	0.050665	0	0.0620458	0.094989	0.0354902
NM_001040399.2	Larp1b	La ribonucleoprotein domain family. member 1B (Larp1b). transcript variant 1. mRNA	0.749992	0.347475	0.443599	0.617713	0.896995	0.339424	0.977852	0.518505	1.13274	0.480894	1.13664	0.849197	0.315032	1.39031	0.73353	0.406199	0.885546	0.296832	0.903163	0.843228
NM_001040400.2	Tet2	tet methylcytosine dioxygenase 2 (Tet2). transcript variant 1. mRNA	0.416964	0.308728	0.145806	0.46753	0.300643	0.281571	4.70344	0	0.573641	0.292353	0.456566	0.0981561	0.0529546	0.193314	0	0	0	0.281977	0.354236	0.148257
NM_001040403.2	Flot2	flotillin 2 (Flot2). transcript variant 1. mRNA	0.475067	1.08224	0.367724	0.955174	1.19055	0.534477	2.26184	1.21719	1.86496	0.345565	0.475489	0.792848	0.91578	0.783804	0.802313	0.263787	0.767021	1.09585	0.693784	0.27859
NM_001040426.3	Thsd4	thrombospondin. type I. domain containing 4 (Thsd4). transcript variant 1. mRNA	0	0	0	0	0	0	0	0	0	0	0	0	0	0	0	0	0	0	0	0
NM_001040434.2	Rtl9	retrotransposon Gag like 9 (Rtl9). mRNA	0	0	0	0	0	0	0	0	0	0	0.0159266	0.002449	0	0.004963	0	0.005165	0	0	0	0.0112569
NM_001040435.3	Tacc3	transforming. acidic coiled-coil containing protein 3 (Tacc3). transcript variant 2. mRNA	0.231409	0.275268	0.153176	0.350179	0.18511	0	0	0.0276174	0.60019	0.196497	0.116214	0.122556	0.122595	0.186259	0	0.173649	0.131921	0.103855	0.200837	0.110009
NM_001040459.2	Shroom4	shroom family member 4 (Shroom4). transcript variant 1. mRNA	0	0	0	0	0.0462042	0.0248748	0.0594699	0	0	0	0	0	0	0	0	0	0	0.016617	0	0
NM_001040611.1	Peg10	paternally expressed 10 (Peg10). transcript variant 1. mRNA	1.94764	1.30667	2.28057	2.27698	2.19291	0.493427	8.86392	0.910978	0.785931	0.9566	7.42636	2.17889	0.834945	1.28239	0.925458	0.834721	0.121498	0.893218	0.831652	0.651176
NM_001040631.2	C1qtnf5	C1q and tumor necrosis factor related protein 5 (C1qtnf5). transcript variant 3. mRNA	0	0	0.00884	0	0	0	0.0429013	0.016394	0	0	0	0	0	0	0	0	0	0	0	0
NM_001040632.2	C1qtnf5	C1q and tumor necrosis factor related protein 5 (C1qtnf5). transcript variant 2. mRNA	0	0	0	0	0	0	0	0	0	0	0	0	0	0	0	0	0	0.0143857	0	0
NM_001040654.1	Cdkn2a	cyclin dependent kinase inhibitor 2A (Cdkn2a). transcript variant 2. mRNA	0	0.0301006	0.0795612	0.028346	0	0	0	0	0	0	0	0	0	0	0	0	0	0.0231186	0	0
NM_001040669.2	Gm5169	predicted gene 5169 (Gm5169). mRNA	0	0	0	0	0	0	0	0	0	0	0	0	0	0	0	0	0	0	0	0
NM_001040682.1	Clmn	calmin (Clmn). transcript variant 2. mRNA	0	0.0215566	0.0161437	0.00609	0.0132205	0.004565	0.25808	0.008805	0.001644	0.006396	0.011116	0.003419	0.005472	0	0.004977	0.0009013	0.001052	0.003311	0	0.002946
NM_001040683.2	Med15	mediator complex subunit 15 (Med15). transcript variant 2. mRNA	0.005319	0	0.215634	0.0512174	0.0178691	0	0	0.0380852	0.0118482	0	0.407333	0.496024	0.006575	0.0374582	0	0	0	0	0.0471218	0
NM_001040684.1	Hsd3b7	hydroxy-delta-5-steroid dehydrogenase. 3 beta- and steroid delta-isomerase 7 (Hsd3b7). transcript variant 2. mRNA	0	0	0	0	0.143978	0	1.69873	0.0944208	0.0936297	0.171449	0.204869	0.160401	0.0611242	0	0.080057	0	0.183228	0.122055	0	0
NM_001040686.1	Zfp692	zinc finger protein 692 (Zfp692). transcript variant 2. mRNA	0	0	0	0	0.161114	0.0804057	22.1463	0.14954	0.408356	0.0862017	0.739968	0.489258	0.281097	0.468472	0	0.068029	0.145508	0	0.152717	0
NM_001040689.1	Rspo4	R-spondin 4 (Rspo4). mRNA	0	0	0	0	0	0	0	0	0	0	0	0	0	0	0	0	0	0	0	0
NM_001040690.2	Rap1gds1	RAP1. GTP-GDP dissociation stimulator 1 (Rap1gds1). transcript variant 1. mRNA	1.02016	1.59126	1.31303	1.56081	0.774107	0.165188	6.73689	0.0625821	0.812392	0.487014	1.72371	1.5878	1.06071	1.55278	1.16093	0	0.006794	0.112321	0.401234	0.412453
NM_001040691.1	Ung	uracil DNA glycosylase (Ung). transcript variant 1. mRNA	0	0	0	0	0	0	0	0	0	0.0784997	0	0	0	0.186024	0	0	0	0	0	0
NM_001040692.3	Slc6a18	solute carrier family 6 (neurotransmitter transporter). member 18 (Slc6a18). transcript variant 1. mRNA	0	0	0	0	0	0	0	0	0	0	0	0	0	0	0	0	0	0	0	0
NM_001040695.1	Uevld	UEV and lactate/malate dehyrogenase domains (Uevld). mRNA	0.0228101	0.202707	0.161471	0.0836784	0	0	2.15496	0.0136113	0.0465788	0.0235385	0.0811413	0	0	0	0.0435981	0	0	0	0	0
NM_001040696.1	Nlrp1b	NLR family. pyrin domain containing 1B (Nlrp1b). transcript variant 1. mRNA	0	0	0.0162604	0	0.134409	0	0	0.0402066	0.0539414	0.039111	0	0	0	0	0	0.0154329	0	0	0.01066	0.0280273
NM_001040699.1	Mtmr7	myotubularin related protein 7 (Mtmr7). mRNA	0	0	0.0523327	0	0	0	0	0	0	0	0	0	0	0	0	0	0	0	0	0
NM_001040700.2	BC051019	cDNA sequence BC051019 (BC051019). mRNA	0.146672	0.258376	0.28872	0.326398	0.154595	0.160161	3.61068	0.0926708	0.144148	0.19231	0.227475	0.0749658	0.234633	0.197481	0.104764	0.147553	0.104518	0.106482	0.152879	0.189491
NM_001042407.1	Pex10	peroxisomal biogenesis factor 10 (Pex10). mRNA	0.0850728	0.310692	0.150556	0.263324	0.107182	0	1.21221	0	0	0.0921787	0.213618	0.190957	0.289195	0.143546	0.172169	0	0.0151556	0.0357938	0.0538371	0.0424647
NM_001042408.2	Txnl4a	thioredoxin-like 4A (Txnl4a). transcript variant 4. mRNA	0	0.315685	0.0198669	0	0	0	0.948075	0	0	0	0	0	0.0699624	0	0	0	0	0.213596	0	0
NM_001042411.1	P3h1	prolyl 3-hydroxylase 1 (P3h1). transcript variant 3. mRNA	0.0985337	0.17093	0.0951153	0	0.0137934	0	1.00974	0.0183741	0	0.015252	0.0541227	0.0998841	0.0152252	0.101201	0.0581614	0	0.0351073	0.0345478	0	0.0409865
NM_001042418.1	Cabyr	calcium-binding tyrosine-(Y)-phosphorylation regulated (fibrousheathin 2) (Cabyr). transcript variant 3. mRNA	0	0	0	0	0	0	0	0	0	0	0	0	0	0	0	0	0	0	0	0
NM_001042419.1	Cabyr	calcium-binding tyrosine-(Y)-phosphorylation regulated (fibrousheathin 2) (Cabyr). transcript variant 4. mRNA	0.0428224	0	0.0551157	0.0294549	0	0	0	0.0127765	0	0	0	0	0	0.0251324	0	0.0261554	0	0	0	0
NM_001042420.1	Cabyr	calcium-binding tyrosine-(Y)-phosphorylation regulated (fibrousheathin 2) (Cabyr). transcript variant 5. mRNA	0	0	0	0	0	0	0.0718779	0	0	0	0	0.0199975	0	0	0	0	0	0	0	0
NM_001042421.1	Kntc1	kinetochore associated 1 (Kntc1). mRNA	0	0	0	0	0.0394483	0	0.577558	0	0	0.0436197	0	0	0	0	0	0	0	0	0	0
NM_001042438.2	Zhx1	zinc fingers and homeoboxes 1 (Zhx1). transcript variant 2. mRNA	0.0837047	0.0733669	0.499887	0.541208	0	0	2.15931	0.147847	0.139849	0	0.418263	0.335529	0.202802	0.145413	0.180693	0	0	0	0	0
NM_001042451.2	Snca	synuclein. alpha (Snca). transcript variant 1. mRNA	850.609	448.07	436.663	385.312	727.24	383.636	537.448	429.373	719.373	430.141	399.719	535.962	738.846	872.206	406.705	646.046	817.292	283.874	622.159	681.632
NM_001042484.1	Golga7	golgi autoantigen. golgin subfamily a. 7 (Golga7). transcript variant 2. mRNA	1.42581	2.96246	2.6969	2.65062	1.87727	0.834574	19.6471	0.781828	1.98514	0.972277	2.50373	2.81816	1.83395	2.23337	1.41677	0.570772	0.926782	0.524238	0.902305	1.00665
NM_001042485.1	Tmem183a	transmembrane protein 183A (Tmem183a). transcript variant 2. mRNA	0.0165961	0	0.252765	0.00761	0.0557576	0.0890007	0	0.0132043	0.218741	0.157559	0.166691	0.0320448	0.188054	0.376621	0	0.0473044	0.0394209	0	0.0140034	0.121499
NM_001042487.1	Dlgap4	DLG associated protein 4 (Dlgap4). transcript variant 2. mRNA	0.226708	0.324134	0.173832	0.909088	0.440254	0.27758	0	0.267684	0.10208	0.358386	0.702494	0.785142	0.178878	0.393501	0.605234	0.123739	0.0859313	0.189418	0.262517	0.256823
NM_001042488.2	Dlgap4	DLG associated protein 4 (Dlgap4). transcript variant 3. mRNA	0.0627648	0	0.042315	0.0246698	0.127192	0.0739764	0.224024	0.0285357	0.119845	0.0148043	0.086306	0.155816	0.0369457	0.0771813	0	0.113182	0.136308	0.0201203	0	0.0318268
NM_001042489.2	Hvcn1	hydrogen voltage-gated channel 1 (Hvcn1). transcript variant 1. mRNA	1.61647	3.44349	2.84405	3.18664	1.66967	0.419518	6.76387	0.322152	0.104882	0	2.76245	1.84726	2.00594	2.82953	1.84213	0	0.545749	0	0.278086	0
NM_001042491.2	Anapc5	anaphase-promoting complex subunit 5 (Anapc5). transcript variant 2. mRNA	0.493407	1.63223	0.745675	1.33126	0.84489	0.181217	8.01299	0.284929	0.836767	0.122199	1.79447	1.70749	1.27099	0.971493	0.833197	0.217762	0.480898	0.196437	0.15713	0.173726
NM_001042499.1	Rabl3	RAB. member RAS oncogene family-like 3 (Rabl3). mRNA	0	0.272051	0.217396	0.23832	0.116405	0	3.92254	0.149894	0.270141	0.0643571	0.212063	0.36126	0.149902	0.238932	0	0.0317435	0.148138	0	0.164447	0.046119
NM_001042501.1	Fam133b	family with sequence similarity 133. member B (Fam133b). mRNA	0.383887	0.688498	0.606608	0.67451	0.43417	0.183448	18.1499	0.344745	0.389483	0.12708	0.739657	0.748574	0.49803	0.602294	0.415374	0.139291	0.384604	0.115141	0.279017	0.187193
NM_001042502.2	Pitx2	paired-like homeodomain transcription factor 2 (Pitx2). transcript variant 3. mRNA	0	0	0	0	0	0	0	0	0	0	0	0	0	0	0	0	0	0	0	0
NM_001042503.2	Trim71	tripartite motif-containing 71 (Trim71). mRNA	0	0	0	0	0	0	0	0	0	0	0	0	0	0	0	0	0	0	0	0
NM_001042504.2	Pitx2	paired-like homeodomain transcription factor 2 (Pitx2). transcript variant 1. mRNA	0	0	0	0	0	0	0	0	0	0	0	0	0	0	0	0	0	0	0	0
NM_001042513.1	Txnrd1	thioredoxin reductase 1 (Txnrd1). transcript variant 1. mRNA	0.771411	1.46759	0.517873	0.948394	1.10499	0.700936	12.126	0.614777	1.94681	0.336401	1.28383	1.06887	0.649442	0.138379	0.726124	0.450819	0	0.54921	0.953647	0.83578
NM_001042514.1	Txnrd1	thioredoxin reductase 1 (Txnrd1). transcript variant 3. mRNA	0	0	0.511302	0	0	0	2.8559	0.220653	0.236545	0	0	0	0	0	0	0	0.242135	0	0.246656	0
NM_001042523.1	Txnrd1	thioredoxin reductase 1 (Txnrd1). transcript variant 4. mRNA	0	0.133771	0	0	0.113346	0	12.3427	0.612577	0.614659	0	0	0	0.211497	0	0	0.297318	0	0	0	0
NM_001042527.2	Blm	Bloom syndrome. RecQ like helicase (Blm). transcript variant 2. mRNA	0.118083	0.0333869	0.0294158	0.0628816	0	0	2.0878	0.0750086	0.165466	0.0330184	0	0.105911	0	0.0402402	0	0.0628173	0.0488586	0.004274	0.139812	0
NM_001042528.2	Cacna1b	calcium channel. voltage-dependent. N type. alpha 1B subunit (Cacna1b). transcript variant 1. mRNA	0	0	0.005767	0	0	0	0	0.005348	0	0	0	0	0	0	0	0	0	0	0	0
NM_001042534.3	Capg	capping protein (actin filament). gelsolin-like (Capg). transcript variant 2. mRNA	3.43407	5.10796	2.64067	3.45063	1.87036	1.19987	8.86907	2.42617	2.4176	0.457004	3.10206	1.87689	4.49241	5.88114	1.48532	0.55016	1.51551	0.715851	0.4671	0.766003
NM_001042541.1	Akap1	A kinase (PRKA) anchor protein 1 (Akap1). transcript variant 2. mRNA; nuclear gene for mitochondrial product	0.0209725	0.0782951	0	0.0577028	0.0626321	0	0.0873322	0	0	0	0	0	0	0	0	0	0	0	0	0
NM_001042542.2	Akap4	A kinase (PRKA) anchor protein 4 (Akap4). transcript variant 2. mRNA	0	0	0	0	0	0	0	0	0	0	0	0	0	0	0	0	0	0	0	0
NM_001042556.1	Rpf2	ribosome production factor 2 homolog (Rpf2). transcript variant 2. mRNA	0	0.0699057	0.0369546	0	0	0.0355329	0.64264	0.0342662	0	0	0	0	0.0236614	0.101106	0.0645632	0	0.0409202	0	0	0.0318486
NM_001042557.2	Map2k7	mitogen-activated protein kinase kinase 7 (Map2k7). transcript variant 1. mRNA	0	0	0	0	0	0	0.0636036	0.0121526	0	0	0	0	0	0	0	0	0	0	0	0
NM_001042558.1	Apaf1	apoptotic peptidase activating factor 1 (Apaf1). transcript variant 1. mRNA	0.29382	0.331671	0.113451	1.02704	0.0209394	0	5.48075	0.0573804	0.703622	0	0.295113	0	0	0	0	0.150095	0	0.0509476	0.165656	0.0888865
NM_001042564.1	Cd27	CD27 antigen (Cd27). transcript variant 2. mRNA	0	0.344109	0	0	0.155176	0	0.108187	0	0	0.0772132	0.156569	0.128422	0.282617	0	0	0	0	0	0	0.0922197
NM_001042565.3	Wsb1	WD repeat and SOCS box-containing 1 (Wsb1). transcript variant 2. mRNA	0.190374	0.496223	0.245025	0.426218	0.430578	0.0970113	10.9818	0.240565	0.14552	0.0832033	0.0749848	0.116763	0.110743	0.210315	0.110798	0.0273595	0.106399	0.0586341	0.0566942	0
NM_001042577.1	Lhx9	LIM homeobox protein 9 (Lhx9). transcript variant 3. mRNA	0	0	0	0	0	0	0	0	0	0	0	0	0	0	0	0	0	0	0	0
NM_001042580.1	Cd63	CD63 antigen (Cd63). transcript variant 1. mRNA	0	0	0	0	0	0	0.228151	0.119878	0	0	0	0	0	0	0	0	0	0	0	0
NM_001042591.1	Arrdc3	arrestin domain containing 3 (Arrdc3). transcript variant 1. mRNA	1.06102	0.973022	1.79701	2.13511	3.66034	0.0634084	1.42682	0.527401	0.344791	0.206203	2.00487	1.06104	0.955311	1.45592	1.17517	0.0625893	0	0.0622771	0.302627	0.301218
NM_001042592.2	Arrdc4	arrestin domain containing 4 (Arrdc4). transcript variant 1. mRNA	0.630481	0.567037	0.684414	0.722269	1.36943	0.14439	3.89607	0.251707	0.324884	0.0944662	0.597198	0.909783	0.513103	0.258098	0.260337	0.0602988	0.15349	0.120835	0.181747	0.0985567
NM_001042593.1	Hbs1l	Hbs1-like (S. cerevisiae) (Hbs1l). transcript variant 2. mRNA	0.0975118	0	0.0526312	0	0.0457948	0	0.176829	0	0.171676	0.327195	0.363329	0	0	0.0479989	0	0	0.381055	0	0.258779	0
NM_001042605.1	Cd74	CD74 antigen (invariant polypeptide of major histocompatibility complex. class II antigen-associated) (Cd74). transcript variant 1. mRNA	18.0162	47.2375	26.6223	25.8621	12.2264	2.72643	197.008	5.66016	6.43451	3.21309	24.1175	38.0008	24.1995	46.2166	13.7388	2.71364	6.89009	2.8975	2.48628	1.97942
NM_001042606.3	Sstr2	somatostatin receptor 2 (Sstr2). transcript variant 1. mRNA	0	0	0	0	0	0	0	0	0	0	0	0	0	0	0	0	0	0	0	0
NM_001042607.1	Ryk	receptor-like tyrosine kinase (Ryk). transcript variant 2. mRNA	0.508014	0.121723	0.59158	0.184884	0.409383	0.136384	0.436518	0.535712	0.161669	0	0.276722	0.370565	0.182744	0.261869	0.464189	0.495805	0.0996001	0	0.214326	0.457962
NM_001042612.2	Nlrp9c	NLR family. pyrin domain containing 9C (Nlrp9c). mRNA	0	0	0	0	0	0	0	0	0	0	0	0	0	0	0	0	0	0	0	0
NM_001042613.2	Selenop	selenoprotein P (Selenop). transcript variant 2. mRNA	0.31414	0.53434	0.581559	1.41486	0.6265	0	0	0.200293	0	0	0.470041	1.38595	1.43625	0.272764	1.09732	0	0.251453	0	0.413937	0
NM_001042614.2	Selenop	selenoprotein P (Selenop). transcript variant 3. mRNA	0.082693	0	0.0638593	0.119447	0	0	1.39459	0.399692	0	0	0.0830568	0.0574809	0.112442	0.252368	0	0	0	0	0.109895	0
NM_001042615.2	Htra3	HtrA serine peptidase 3 (Htra3). transcript variant 2. mRNA	0.0396432	0.0463295	0.0102048	0	0.008879	0	0.0742858	0	0	0	0	0.009185	0.0784072	0	0	0	0.0451993	0	0	0
NM_001042617.1	Cadps	Ca2+-dependent secretion activator (Cadps). transcript variant 2. mRNA	0	0	0	0	0	0	0	0	0	0	0	0	0	0	0	0	0	0	0	0
NM_001042620.2	Dhx15	DEAH (Asp-Glu-Ala-His) box polypeptide 15 (Dhx15). transcript variant 1. mRNA	0	0.0977843	0.157324	0.12011	0.0195556	0.0108051	19.2419	0.118093	0.0259329	0	0.0401931	0.175327	0.0359757	0.0273291	0.0942379	0.0391071	0	0.0326534	0	0
NM_001042623.2	Phc1	polyhomeotic 1 (Phc1). transcript variant 2. mRNA	0.100604	0.4614	0.292093	0.479565	0.131006	0.0173725	1.22024	0.234545	0.177204	0	0.111621	0.506862	0.381756	0.615156	0.160985	0	0	0.0787502	0.0177671	0.0560562
NM_001042630.2	Lcn5	lipocalin 5 (Lcn5). transcript variant 2. mRNA	0	0	0	0	0	0	0	0	0	0	0	0	0	0	0	0	0	0	0	0
NM_001042634.2	Clk1	CDC-like kinase 1 (Clk1). transcript variant 1. mRNA	2.14384	2.81021	2.57451	2.60032	2.34728	0.497461	3.10858	0.251286	0.703568	0.598503	3.8331	2.63891	2.21826	2.20749	1.85296	0	0.286441	0.633551	0.575384	0.407661
NM_001042649.1	Dcun1d2	DCN1. defective in cullin neddylation 1. domain containing 2 (S. cerevisiae) (Dcun1d2). transcript variant 3. mRNA	0	0.399773	0.143919	0	0.0329541	0	0.836293	0.021071	0	0	0.177333	0	0	0.203787	0.0277908	0	0.0671003	0	0	0
NM_001042650.1	Dcun1d2	DCN1. defective in cullin neddylation 1. domain containing 2 (S. cerevisiae) (Dcun1d2). transcript variant 4. mRNA	0.264632	0	0.203578	0.175747	0.214606	0.0828156	0	0	0	0	0.0611025	0.35944	0.282001	0.160667	0.168259	0	0	0	0	0
NM_001042651.1	Dcun1d2	DCN1. defective in cullin neddylation 1. domain containing 2 (S. cerevisiae) (Dcun1d2). transcript variant 2. mRNA	0	0	0	0	0	0	0	0	0	0	0.163323	0	0.186388	0	0	0.0577856	0	0	0.007484	0
NM_001042652.1	Nusap1	nucleolar and spindle associated protein 1 (Nusap1). transcript variant 2. mRNA	0.440767	0.505271	0.523965	0.543192	0.867251	0.117429	0.822112	0.116896	0.375023	0.325969	0.368922	0.0992906	0.174049	0.833541	0	0.41504	0.231204	0	0.193704	0.240384
NM_001042653.1	Oip5	Opa interacting protein 5 (Oip5). mRNA	0.0956147	0.0657302	0.115824	0.123798	0.0440912	0.0417632	1.6336	0.114111	0.187939	0.0835774	0.09886	0.0390959	0.111241	0.0462132	0.0151767	0.054965	0.0240475	0.0631047	0.10678	0.0898387
NM_001042655.1	Tbc1d17	TBC1 domain family. member 17 (Tbc1d17). mRNA	0.646436	1.38699	0.719344	0.495593	0.256396	0.1	15.6674	0.289307	0.198755	0.308523	1.03986	0.912733	0.736656	0.976143	0.722259	0.0493544	0.196735	0.260651	0.132101	0.14341
NM_001042659.1	Fzd5	frizzled class receptor 5 (Fzd5). transcript variant 2. mRNA	0.0539062	0.108747	0.0759891	0	0.117864	0.0524167	0.336708	0	0.188704	0.0953613	0	0.0579906	0	0.102445	0.0484863	0.0439003	0.0878018	0	0	0
NM_001042660.1	Smad7	SMAD family member 7 (Smad7). mRNA	0.471283	0.515627	0.512672	0.783968	0.43283	0.0341647	7.80888	0.237688	0.232814	0.14651	0.705578	0.865818	0.519195	0.657347	0.609244	0.052994	0.132085	0.061948	0.109814	0.0209981
NM_001042670.1	Mterf1b	mitochondrial transcription termination factor 1b (Mterf1b). mRNA; nuclear gene for mitochondrial product	0.0960218	0.317948	0.0906307	0.387479	0.150548	0.0158444	0.899656	0.0763977	0	0	0.16074	0.266984	0.174088	0.195364	0.0518205	0	0	0	0	0.0340835
NM_001042672.1	Gpcpd1	glycerophosphocholine phosphodiesterase 1 (Gpcpd1). transcript variant 4. mRNA	0.234936	0.331887	0.468524	0.227303	0.465492	0.0447304	12.0299	0.19103	0.186914	0.1055	0.204205	0.331998	0.255309	0.257585	0.0905636	0.0946129	0.007359	0.0695194	0.271211	0.0549838
NM_001042673.2	Fancc	Fanconi anemia. complementation group C (Fancc). transcript variant 2. mRNA	0.0193498	0.0848004	0	0.0228164	0	0	0.673379	0.003299	0.0246313	0	0	0.0128098	0.006834	0.0324468	0.022377	0	0.039396	0	0.006997	0
NM_001042674.2	Rbpms	RNA binding protein gene with multiple splicing (Rbpms). transcript variant 2. mRNA	0.177631	0.145313	0	0.263911	0.119357	0	0.0443806	0	0.110796	0	0.133809	0.415693	0.0526982	0.0333603	0	0.0607569	0	0	0.0629501	0.056746
NM_001042675.2	Rbpms	RNA binding protein gene with multiple splicing (Rbpms). transcript variant 3. mRNA	0.0319605	0	0.0205678	0.0879348	0	0.0197765	0	0.0381431	0	0	0	0.166621	0.0395077	0.0375151	0.107802	0	0.0455499	0	0.0202258	0.0425422
NM_001042699.2	Syne3	spectrin repeat containing. nuclear envelope family member 3 (Syne3). transcript variant 1. mRNA	0	0	0	0	0	0	0	0	0	0	0	0	0	0	0	0	0	0	0	0
NM_001042707.2	Ilf3	interleukin enhancer binding factor 3 (Ilf3). transcript variant 2. mRNA	0	0	0	0	0	0	0	0	0	0	0	0	0	0	0	0	0	0	0	0
NM_001042708.2	Ilf3	interleukin enhancer binding factor 3 (Ilf3). transcript variant 3. mRNA	0	0	0.005968	0.0318959	0	0	0	0	0.0258248	0	0.110616	0.0322331	0	0	0.0312816	0	0	0	0	0
NM_001042709.2	Ilf3	interleukin enhancer binding factor 3 (Ilf3). transcript variant 4. mRNA	0	0	0.0542753	0	0	0	0	0	0	0.005802	0.108829	0.0325694	0	0.0247491	0	0	0	0	0	0
NM_001042710.1	Prss57	protease. serine 57 (Prss57). mRNA	0	0	0	0	0.0218503	0	0.436699	0.0504514	0	0	0	0	0.008039	0	0.0350986	0	0	0	0	0
NM_001042711.2	Amy2a5	amylase 2a5 (Amy2a5). mRNA	0	0	0	0	0	0	0	0	0	0	0	0	0	0	0	0	0	0	0	0
NM_001042714.1	Ankdd1b	ankyrin repeat and death domain containing 1B (Ankdd1b). transcript variant 2. mRNA	0	0	0	0	0	0	0.0495014	0	0	0	0	0	0	0	0.0427695	0	0	0	0	0
NM_001042715.3	Drc7	dynein regulatory complex subunit 7 (Drc7). mRNA	0	0.004517	0	0	0	0	0	0.007381	0	0	0.007765	0	0	0	0	0	0	0	0	0
NM_001042719.2	Ddhd1	DDHD domain containing 1 (Ddhd1). transcript variant 3. mRNA	0.0454613	0.036895	0.108356	0.120448	0	0	4.29621	0	0	0	0.122609	0.0546184	0	0.177874	0	0	0	0	0	0.031377
NM_001042725.1	Calcr	calcitonin receptor (Calcr). transcript variant 1a. mRNA	0	0	0	0	0	0	0	0	0	0	0.006335	0	0	0	0	0	0	0	0	0.0470158
NM_001042726.3	Pcdh8	protocadherin 8 (Pcdh8). transcript variant 2. mRNA	0	0.006893	0.006073	0	0	0	0	0	0	0	0	0	0	0	0	0	0	0.0105877	0	0
NM_001042727.2	Rarg	retinoic acid receptor. gamma (Rarg). transcript variant 2. mRNA	0.835695	1.45468	1.46298	1.52846	1.4128	0.146614	11.4398	0.470018	0.47076	0.202213	1.53563	1.82135	1.06074	1.4808	1.38239	0.219036	0.219039	0.330507	0.218838	0.36227
NM_001042743.2	Mast2	microtubule associated serine/threonine kinase 2 (Mast2). transcript variant 1. mRNA	0	0.096102	0.11027	0.298862	0	0.160935	0	0	0.0988352	0	0.0806735	0	0	0	0.20022	0	0.152629	0	0.37759	0.0896033
NM_001042752.1	Neo1	neogenin (Neo1). transcript variant 2. mRNA	0.004794	0.014006	0	0.006595	0	0	0.0449151	0	0	0	0.009028	0.002777	0	0	0	0	0	0	0	0
NM_001042760.2	Slc22a18	solute carrier family 22 (organic cation transporter). member 18 (Slc22a18). transcript variant 2. mRNA	0	0	0	0	0	0	0	0	0	0	0	0	0	0	0	0	0	0	0	0
NM_001042767.3	Proc	protein C (Proc). transcript variant 2. mRNA	0	0	0	0	0	0	0.0347959	0	0	0	0.0139881	0	0	0	0	0	0	0	0	0
NM_001042768.3	Proc	protein C (Proc). transcript variant 3. mRNA	0	0	0	0	0	0	0	0	0	0	0	0	0	0	0	0	0	0	0	0
NM_001042779.2	Sema3b	sema domain. immunoglobulin domain (Ig). short basic domain. secreted. (semaphorin) 3B (Sema3b). transcript variant 1. mRNA	0	0	0	0	0	0	0	0	0	0	0	0	0	0	0	0	0	0	0	0
NM_001043228.1	Dntt	deoxynucleotidyltransferase. terminal (Dntt). transcript variant 2. mRNA	0	0.0246845	0.043497	0.0232457	0	0.0104559	0.7784	0.131081	0.0752842	0.0209246	0.0530373	0.0783049	0.0417756	0.0297515	0	0.0412834	0	0	0	0
NM_001043317.2	Cd22	CD22 antigen (Cd22). transcript variant 1. mRNA	0.69895	1.9453	0.66301	0.685128	0.227405	0.134907	4.21892	0	0.0595192	0	1.83557	0.740412	0.850789	0.88064	0.478717	0	0	0	0.12174	0
NM_001043335.1	Eml1	echinoderm microtubule associated protein like 1 (Eml1). transcript variant 1. mRNA	0	0	0	0	0	0	0	0	0	0	0	0	0	0	0	0	0	0	0	0
NM_001043336.2	Eml1	echinoderm microtubule associated protein like 1 (Eml1). transcript variant 2. mRNA	0.0138053	0.0369732	0.0236914	0.0284876	0.0206141	0.008542	0	0	0.0179396	0	0.0317764	0.007997	0.0625728	0.0108031	0.018626	0.0112428	0	0.002582	0	0.0153134
NM_001043354.2	Rorb	RAR-related orphan receptor beta (Rorb). transcript variant 1. mRNA	0	0	0	0	0	0	0.0559416	0	0	0	0	0	0	0	0	0	0	0	0	0
NM_001043355.2	Map6	microtubule-associated protein 6 (Map6). transcript variant 3. mRNA	0	0.0109574	0	0.0412748	0.0168002	0	0	0.0134277	0	0	0.0282518	0.0260695	0.0185441	0.0176088	0	0	0	0	0	0
NM_001044308.2	Cacna1i	calcium channel. voltage-dependent. alpha 1I subunit (Cacna1i). mRNA	0.366033	1.05121	0.374827	0.600332	0.161574	0	7.1649	0.0850296	0	0	0.580313	0.21564	0.462376	0.816436	0.207872	0	0	0	0	0.004742
NM_001044371.2	Rad17	RAD17 checkpoint clamp loader component (Rad17). transcript variant 2. mRNA	0.220931	0.678226	0.45744	0.876551	0.27252	0.0951009	5.68991	0.187243	0.331672	0	0.490437	0.571257	0.633278	0.556239	0.336956	0.101695	0.100393	0.053887	0.226943	0.132122
NM_001044380.1	Hhipl1	hedgehog interacting protein-like 1 (Hhipl1). mRNA	0	0	0	0	0	0	0	0	0	0	0	0	0	0	0	0.004107	0	0	0	0
NM_001044382.2	Prok1	prokineticin 1 (Prok1). transcript variant 1. mRNA	0	0	0	0	0	0	0	0	0	0	0	0	0	0	0	0	0	0	0	0
[truncated: 128,331 more rows]
