# Supplementary material for: The infection-tolerant white-footed deermouse tempers interferon responses to endotoxin in comparison to the mouse and rat
Source: eLife. 2024 Jan 9;12:RP90135. doi: 10.7554/eLife.90135 (PMC10945503; doi:10.7554/eLife.90135)
Supplement: Figure 3—source data 1. [file elife-90135-fig3-data1.xlsx]

## Sheet: Figure 3-Source Data 1
Figure 3-Source Data 1. Differentially expressed gene analysis for P. leucopus
accession	length	gene	product	maximum group mean	fold-change	FDR p-value
XM_037199286.1	504	Saa3	serum amyloid A-3 protein (LOC114700540), mRNA	2059.46	13.27	3.3e-184
XM_028860282.2	588	Saa3	serum amyloid A-3 protein-like (LOC114685651), mRNA	2340.94	14.49	7.2e-177
XM_037199231.1	600	Saa1	serum amyloid A-1 protein-like (LOC114700507), mRNA	459.94	13.33	4.5e-111
XM_028860285.2	675	Saa5	serum amyloid A-5 protein (LOC114685652), transcript variant X2, mRNA	252.65	12.58	1.8e-109
XM_028860284.2	683	Saa5	serum amyloid A-5 protein (LOC114685652), transcript variant X1, mRNA	299.76	12.97	1.9e-96
XM_028890551.2	837	Ccl3	C-C motif chemokine 3 (LOC114707732), mRNA	77.82	7.74	3.9e-84
XM_028859812.2	1765	Fpr2	formyl peptide receptor 2 (Fpr2), mRNA	226.43	6.18	1.6e-79
XM_037208345.1	2864	Acod1	aconitate decarboxylase 1 (Acod1), mRNA	113.15	6.69	7.2e-72
XM_028866972.2	5216	Myo1d	myosin ID (Myo1d), transcript variant X1, mRNA	31.36	5.11	1.4e-70
XM_028868677.2	1838	Il1rn	interleukin 1 receptor antagonist (Il1rn), transcript variant X1, mRNA	477.48	5.79	1.3e-64
XM_028868627.2	910	Slpi	secretory leukocyte peptidase inhibitor (Slpi), mRNA	1154.86	8.47	4.4e-63
XM_028859810.2	1692	Fpr1	formyl peptide receptor 1 (Fpr1), transcript variant X1, mRNA	158.56	5.63	1.8e-54
XM_028859809.2	1556	Fpr1	formyl peptide receptor 1 (Fpr1), transcript variant X2, mRNA	80.55	5.76	2.8e-54
XM_037200580.1	1622	Gas7	growth arrest specific 7 (Gas7), transcript variant X3, mRNA	120.66	5.62	6.3e-53
XM_028889425.2	1345	Csf3	colony stimulating factor 3 (Csf3), mRNA	50.5	11.66	2e-52
XM_028867455.2	1924	Ibsp	integrin binding sialoprotein (LOC114691862), transcript variant X2, mRNA	210.84	10.27	4.6e-51
XM_028883404.2	1723	Serpinb3a	serpin B4-like (LOC114702823), mRNA	16.21	10.98	5.5e-49
XM_028874350.2	1694	Gpr84	G protein-coupled receptor 84 (Gpr84), transcript variant X2, mRNA	24.63	6.73	1.2e-47
XM_028864324.2	3163	Fcgr2b	Fc fragment of IgG receptor IIb (Fcgr2b), transcript variant X3, mRNA	59.98	4.38	5.7e-46
XM_028889615.2	1825	Sphk1	sphingosine kinase 1 (Sphk1), transcript variant X2, mRNA	47.58	5.52	4.1e-45
XM_028861705.2	1161	Ier3	immediate early response 3 (Ier3), mRNA	75.48	3.94	8.2e-45
XM_037206709.1	4839	Pglyrp3	peptidoglycan recognition protein 3 (Pglyrp3), mRNA	4.65	6.05	8.2e-45
XM_028892197.2	2933	Tgm1	transglutaminase 1 (Tgm1), mRNA	28.73	4.89	9.8e-45
XM_028880026.2	2832	Tnip1	TNFAIP3 interacting protein 1 (Tnip1), transcript variant X5, mRNA	60.17	5.71	1.5e-44
XM_028862479.2	3532	Steap2	STEAP2 metalloreductase (Steap2), transcript variant X1, mRNA	7.64	8.39	9.1e-43
XM_028880027.2	2697	Tnip1	TNFAIP3 interacting protein 1 (Tnip1), transcript variant X2, mRNA	45.55	4.58	1.3e-42
XM_028877852.2	979	Batf	basic leucine zipper ATF-like transcription factor (Batf), mRNA	98.09	3.77	5.1e-42
XM_028864328.2	3307	Fcgr2b	Fc fragment of IgG receptor IIb (Fcgr2b), transcript variant X2, mRNA	37.07	4.05	1.1e-41
XM_028862433.2	1208	Steap1	STEAP family member 1 (Steap1), transcript variant X1, mRNA	20.29	8.54	1.3e-41
XM_028894546.2	1928	Cd274	CD274 molecule (Cd274), transcript variant X1, mRNA	50.22	3.81	3.1e-41
XM_028890521.2	424	Wfdc21	protein Wfdc21 (LOC114707706), mRNA	168.24	5.34	1.1e-40
XM_028856571.2	4740	Alpk1	alpha kinase 1 (Alpk1), mRNA	22.05	3.71	2.1e-40
XM_028867490.2	3644	Nfkbiz	NFKB inhibitor zeta (Nfkbiz), transcript variant X1, mRNA	41.05	3.61	8.2e-40
XM_037204566.1	1158	Lcn2	lipocalin 2 (Lcn2), transcript variant X3, mRNA	149.74	6.33	1.9e-39
XM_028871478.2	495	Mt1	metallothionein-1 (LOC114694510), mRNA	338.61	6.71	2.6e-38
XM_028874824.2	1235	Marcks	myristoylated alanine rich protein kinase C substrate (Marcks), mRNA	47.62	4.14	3.7e-38
XM_037200321.1	4404	Tnfaip3	TNF alpha induced protein 3 (Tnfaip3), transcript variant X3, mRNA	66.82	4.41	5.7e-38
XM_028871479.2	407	Mt2	metallothionein-2 (LOC114694511), mRNA	307.61	8.05	3e-37
XM_028884304.2	1133	Ms4a3	membrane spanning 4-domains A3 (Ms4a3), mRNA	77.96	4.58	3e-37
XR_005090785.1	2178	LOC114707630	uncharacterized LOC114707630 (LOC114707630), transcript variant X1, ncRNA	5.66	7.07	6.1e-37
XM_028872948.2	1209	Socs1	suppressor of cytokine signaling 1 (Socs1), mRNA	30.33	5.04	1e-36
XM_028859123.2	2032	Paf1	PAF1 homolog, Paf1/RNA polymerase II complex component (Paf1), mRNA	220.54	3.89	1.2e-36
XM_028866040.2	2975	Pxylp1	2-phosphoxylose phosphatase 1 (Pxylp1), transcript variant X1, mRNA	35.59	6.74	2.6e-36
XM_037211276.1	2075	Fcgr2a	Fc fragment of IgG receptor IIa (Fcgr2a), transcript variant X2, mRNA	64.93	3.71	2.2e-35
XM_028892581.2	2790	Socs3	suppressor of cytokine signaling 3 (Socs3), mRNA	288.28	4.2	3e-35
XM_028891396.2	4570	Pfkfb3	6-phosphofructo-2-kinase/fructose-2,6-biphosphatase 3 (Pfkfb3), transcript variant X9, mRNA	32.14	4.71	7.3e-35
XM_028869724.2	1587	Nfkbia	NFKB inhibitor alpha (Nfkbia), mRNA	273.93	3.41	1.6e-33
XM_037204891.1	1529	Cblif	cobalamin binding intrinsic factor-like (LOC114703403), transcript variant X2, mRNA	710.42	5.96	2.1e-33
XM_037199012.1	5120	Tmem164	transmembrane protein 164 (Tmem164), transcript variant X8, mRNA	18.68	6.17	5.1e-33
XM_028884808.2	1164	Lcn2	lipocalin 2 (Lcn2), transcript variant X2, mRNA	1548.41	6.69	6.4e-33
XM_037210129.1	3089	Gpr35	G protein-coupled receptor 35 (Gpr35), transcript variant X2, mRNA	12.2	3.91	1.2e-32
XR_005090082.1	1398	LOC119086738	uncharacterized LOC119086738 (LOC119086738), ncRNA	8.91	7.06	1.2e-32
XM_037203027.1	2545	Fgr	FGR proto-oncogene, Src family tyrosine kinase (Fgr), transcript variant X2, mRNA	126.29	4.15	1.5e-32
XM_028881893.2	1292	Cxcl2	C-X-C motif chemokine 2-like (LOC114701735), mRNA	108.52	9.19	1.7e-32
XM_028885750.2	1133	Cybrd1	cytochrome b reductase 1 (LOC114704488), mRNA	56.81	3.59	2.4e-32
XM_028876726.2	750	Batf3	basic leucine zipper ATF-like transcription factor 3 (Batf3), mRNA	20.35	4.74	2.5e-32
XM_028881877.2	1216	Cxcl3	C-X-C motif chemokine 3-like (LOC114701719), mRNA	80.73	11.96	2.6e-32
XM_037209236.1	1960	Ibsp	integrin binding sialoprotein (LOC114691862), transcript variant X1, mRNA	169.86	9.73	2.7e-32
XM_028864327.2	2076	Fcgr2a	Fc fragment of IgG receptor IIa (Fcgr2a), transcript variant X1, mRNA	390.45	3.62	4.7e-32
XM_028876189.2	1659	Csprs	component of Sp100-rs; olfactory receptor 11H7-like (LOC114697855), mRNA	41.95	4.14	5.1e-32
XM_028894000.2	1221	Glrx	glutaredoxin (Glrx), transcript variant X1, mRNA	76.97	3.08	9.7e-32
XM_028879198.2	2744	Olfm4	olfactomedin 4 (Olfm4), mRNA	132.21	6.18	1.2e-31
XM_028885451.2	2623	Zc3h12a	zinc finger CCCH-type containing 12A (Zc3h12a), mRNA	32.44	3.15	1.8e-31
XM_028865841.2	1517	Il1r2	interleukin 1 receptor type 2 (Il1r2), transcript variant X2, mRNA	300.48	5.45	2.6e-31
XM_028893881.2	1837	Bcl3	BCL3 transcription coactivator (Bcl3), mRNA	90.07	3.34	4.4e-31
XM_037201407.1	2659	Tnip1	TNFAIP3 interacting protein 1 (Tnip1), transcript variant X11, mRNA	22.61	4.7	1.5e-30
XM_028877161.2	2770	Klf5	Kruppel like factor 5 (Klf5), transcript variant X3, mRNA	11.39	4.2	2.1e-30
XM_028859947.2	1520	Treml4	triggering receptor expressed on myeloid cells-like 4; trem-like transcript 4 protein (LOC114685334), mRNA	56.23	4.22	5.8e-30
XM_028863798.2	1103	Gadd45g	growth arrest and DNA damage inducible gamma (Gadd45g), mRNA	35.61	3.83	7.7e-30
XM_028881924.2	1182	Cxcl10	C-X-C motif chemokine ligand 10 (Cxcl10), mRNA	72.85	6.7	1e-29
XM_028875171.2	3208	Il1rap	interleukin 1 receptor accessory protein (LOC114697095), transcript variant X4, mRNA	64.46	4.02	2.8e-29
XM_037201405.1	2521	Tnip1	TNFAIP3 interacting protein 1 (Tnip1), transcript variant X8, mRNA	24.08	4.01	3.3e-29
XM_028859221.2	3000	Capn12	calpain 12 (Capn12), mRNA	8.24	5.98	3.3e-29
XM_028888736.2	3475	Slc13a5	solute carrier family 13 member 5 (Slc13a5), mRNA	14.95	9.85	7e-29
XM_028865982.2	1746	Plscr1	phospholipid scramblase 1 (LOC114690951), transcript variant X1, mRNA	115.33	4.01	8.1e-29
XM_028885765.2	2046	Hcar2	hydroxycarboxylic acid receptor 2 (LOC114704501), mRNA	41.64	3.96	1.2e-28
XM_028856166.2	1008	Pglyrp1	peptidoglycan recognition protein 1 (Pglyrp1), mRNA	1098.17	4.54	1.7e-28
XM_037210992.1	397	Mt1	metallothionein-1-like (LOC114698905), mRNA	118.48	7.72	1.9e-28
XM_028883061.2	2604	Hes3	hes family bHLH transcription factor 3 (Hes3), transcript variant X1, mRNA	9.39	5.96	7.3e-28
XM_037203030.1	2483	Fgr	FGR proto-oncogene, Src family tyrosine kinase (Fgr), transcript variant X5, mRNA	84.53	3.96	1.2e-27
XM_028884226.2	1585	Cblif	cobalamin binding intrinsic factor-like (LOC114703402), mRNA	289.81	5.67	3e-27
XM_028863283.2	1048	Trem1	triggering receptor expressed on myeloid cells 1-like (LOC114688764), transcript variant X1, mRNA	101.19	3.64	3.6e-27
XM_028865983.2	1720	Plscr1	phospholipid scramblase 1 (LOC114690951), transcript variant X2, mRNA	28.96	4.11	3.6e-27
XM_037198191.1	4036	Sema6b	semaphorin 6B (Sema6b), mRNA	9.3	4.57	5.3e-27
XM_028884941.2	1382	Timp1	TIMP metallopeptidase inhibitor 1 (Timp1), transcript variant X1, mRNA	15.72	4.83	5.5e-27
XM_028870697.2	3742	Limk2	LIM domain kinase 2 (Limk2), transcript variant X3, mRNA	16.32	4.79	6.3e-27
XM_028860761.2	4620	Tnfaip3	TNF alpha induced protein 3 (Tnfaip3), transcript variant X2, mRNA	40.84	4.22	1.2e-26
XM_028864452.2	1523	Prdx6	peroxiredoxin 6 (Prdx6), mRNA	118.92	3.13	1.3e-26
XM_028864329.2	1187	Fcgr3	low affinity immunoglobulin gamma Fc region receptor IV-like (LOC114689891), mRNA	357.39	3.42	2.2e-26
XM_028876612.2	1743	Chi3l1	chitinase 3 like 1 (Chi3l1), transcript variant X1, mRNA	132.02	4.1	2.2e-26
XM_037211275.1	3309	Fcgr2b	Fc fragment of IgG receptor IIb (Fcgr2b), transcript variant X1, mRNA	38.27	3.33	2.7e-26
XM_028884227.2	1121	Cblif	cobalamin binding intrinsic factor-like (LOC114703403), transcript variant X3, mRNA	25.23	5.75	2.7e-26
XM_028880029.2	2781	Tnip1	TNFAIP3 interacting protein 1 (Tnip1), transcript variant X7, mRNA	65.7	2.83	2.9e-26
XM_028884807.2	1132	Lcn2	lipocalin 2 (Lcn2), transcript variant X1, mRNA	2223.5	6.41	3.1e-26
XM_028894435.2	3092	Serpine1	serpin family E member 1 (Serpine1), transcript variant X1, mRNA	106.48	11.66	3.5e-26
XM_028893634.2	1361	Agtrap	angiotensin II receptor associated protein (LOC114709665), mRNA	85.8	3.23	3.9e-26
XM_028866678.2	1287	Sod2	superoxide dismutase 2 (Sod2), mRNA	1345.56	3.97	4.2e-26
XM_037198316.1	3086	Serpine1	serpin family E member 1 (Serpine1), transcript variant X2, mRNA	174.5	10.61	5.2e-26
XM_028870303.2	3199	Jun	Jun proto-oncogene, AP-1 transcription factor subunit (Jun), mRNA	12.24	2.76	5.7e-26
XM_028864044.2	2516	Rassf4	Ras association domain family member 4 (Rassf4), transcript variant X2, mRNA	90.21	3.55	9.7e-26
XM_028876480.2	1929	Il10	interleukin 10 (Il10), mRNA	7.69	6.79	1.3e-25
XM_028879941.2	3522	Ets2	ETS proto-oncogene 2, transcription factor (Ets2), mRNA	106.94	3.06	2.5e-25
XM_028881894.2	1065	Cxcl1	chemokine (C-X-C motif) ligand 1; growth-regulated alpha protein (LOC114701736), mRNA	79.66	9.35	3.1e-25
XM_037211398.1	1695	Chi3l1	chitinase 3 like 1 (Chi3l1), transcript variant X2, mRNA	188.43	4.06	3.6e-25
XM_028889612.2	1527	Sphk1	sphingosine kinase 1 (Sphk1), transcript variant X1, mRNA	26.39	4.6	6.8e-25
XM_028869610.2	2918	Irak3	interleukin 1 receptor associated kinase 3 (Irak3), transcript variant X1, mRNA	52.72	2.75	9.1e-25
XM_028895342.2	2099	Cish	cytokine inducible SH2 containing protein (Cish), mRNA	47.17	3.17	1.1e-24
XM_037204888.1	1456	Cblif	cobalamin binding intrinsic factor-like (LOC114703403), transcript variant X1, mRNA	89.01	5.17	1.6e-24
XM_028884235.2	2828	Slc15a3	solute carrier family 15 member 3 (Slc15a3), mRNA	40.99	2.77	2.2e-24
XM_028881923.2	1268	Cxcl11	C-X-C motif chemokine ligand 11 (Cxcl11), mRNA	21.96	9.48	2.9e-24
XM_028864183.2	1215	Il6	interleukin 6 (Il6), mRNA	45.19	7.96	5.1e-24
XM_028893901.2	6466	Cemip2	cell migration inducing hyaluronidase 2 (Cemip2), transcript variant X1, mRNA	14.54	3.81	5.5e-24
XM_028873338.2	1271	Mgarp	mitochondria localized glutamic acid rich protein (LOC114695852), mRNA	8.04	7.4	6.4e-24
XM_028871940.2	2504	Lipg	lipase G, endothelial type (Lipg), transcript variant X1, mRNA	70.49	5.63	7.5e-24
XM_028893898.2	1297	Plaur	plasminogen activator, urokinase receptor (Plaur), mRNA	41.94	3.08	8.5e-24
XM_028895314.1	2242	Alas1	5'-aminolevulinate synthase 1 (Alas1), mRNA	49.07	3.08	9.3e-24
XM_028868578.2	1547	Cebpb	CCAAT enhancer binding protein beta (Cebpb), mRNA	40.23	3.38	1.1e-23
XM_028881371.2	2266	Pim2	Pim-2 proto-oncogene, serine/threonine kinase (Pim2), mRNA	60.5	2.98	1.5e-23
XM_028894001.2	1218	Glrx	glutaredoxin (Glrx), transcript variant X2, mRNA	33.66	3.29	1.6e-23
XM_037199644.1	1048	Srgn	serglycin (Srgn), transcript variant X1, mRNA	1495.93	3.27	3.2e-23
XM_028877802.2	2955	Gramd1a	GRAM domain containing 1A (Gramd1a), transcript variant X2, mRNA	37.97	2.7	3.2e-23
XM_028871772.2	1813	Tfec	transcription factor EC (Tfec), transcript variant X1, mRNA	35.19	3.24	3.6e-23
XM_028879075.2	9907	Arhgap32	Rho GTPase activating protein 32 (Arhgap32), mRNA	3.24	5.59	3.6e-23
XM_028892931.2	1655	Bst1	bone marrow stromal cell antigen 1 (Bst1), mRNA	294.72	4.03	8.3e-23
XM_028872432.2	3320	Icam1	intercellular adhesion molecule 1 (Icam1), transcript variant X1, mRNA	52.26	3.75	8.7e-23
XM_028880298.2	3025	Dram1	DNA damage regulated autophagy modulator 1 (Dram1), mRNA	27.75	3.9	1.6e-22
XM_028865997.2	3286	Chst2	carbohydrate sulfotransferase 2 (Chst2), mRNA	9.65	3.5	3e-22
XM_028873584.2	3979	Nlrc4	NLR family CARD domain containing 4 (Nlrc4), transcript variant X3, mRNA	27.69	2.64	4.5e-22
XM_037199712.1	1203	Il1r2	interleukin 1 receptor type 2 (Il1r2), transcript variant X4, mRNA	10.4	5.35	6.5e-22
XM_028887051.2	722	Camp	cathelicidin antimicrobial peptide (LOC114705253), mRNA	674.5	5.68	6.7e-22
XR_005090786.1	1550	LOC114707630	uncharacterized LOC114707630 (LOC114707630), transcript variant X2, ncRNA	7.53	5.76	7.7e-22
XM_028891815.2	6613	N4bp1	NEDD4 binding protein 1 (N4bp1), transcript variant X1, mRNA	74.54	2.86	8.3e-22
XM_028890644.2	3160	Gpr35	G protein-coupled receptor 35 (Gpr35), transcript variant X1, mRNA	9.3	3.59	1.1e-21
XM_028890645.2	2908	Gpr35	G protein-coupled receptor 35 (Gpr35), transcript variant X3, mRNA	8.66	4.51	1.2e-21
XM_037211038.1	2083	Fcrlb	Fc receptor like B (Fcrlb), mRNA	4.35	5.51	1.3e-21
XM_028873144.2	1524	Anxa3	annexin A3 (Anxa3), transcript variant X1, mRNA	114.18	3.77	1.4e-21
XM_028888075.2	5830	Thbs1	thrombospondin 1 (Thbs1), mRNA	294.16	5.06	1.6e-21
XM_028888663.2	2058	Ptx3	pentraxin 3 (Ptx3), mRNA	10.87	8.31	1.6e-21
XM_037197641.1	4748	Csf2rb	colony stimulating factor 2 receptor subunit beta (Csf2rb), transcript variant X8, mRNA	26.81	3.22	1.8e-21
XM_028890405.2	2390	Tpd52	tumor protein D52 (Tpd52), transcript variant X10, mRNA	25.22	2.81	1.8e-21
XM_028893309.2	3223	Cebpd	CCAAT enhancer binding protein delta (Cebpd), mRNA	25.44	3.65	2.6e-21
XM_028858544.2	5948	Sbno2	strawberry notch homolog 2 (Sbno2), transcript variant X6, mRNA	9.86	3.26	2.7e-21
XM_028865122.2	1456	Plet1	placenta-expressed transcript 1 protein-like (LOC114690363), mRNA	47.92	6.61	7.6e-21
XM_028891357.2	4660	Pfkfb3	6-phosphofructo-2-kinase/fructose-2,6-biphosphatase 3 (Pfkfb3), transcript variant X5, mRNA	11.75	6.49	8.2e-21
XM_037197639.1	4752	Csf2rb	colony stimulating factor 2 receptor subunit beta (Csf2rb), transcript variant X5, mRNA	86.45	3.23	1.1e-20
XM_028871067.2	1832	Ncf4	neutrophil cytosolic factor 4 (Ncf4), mRNA	157.14	2.93	1.3e-20
XM_028882204.2	3015	Trib1	tribbles pseudokinase 1 (Trib1), mRNA	21.31	2.58	1.3e-20
XM_028871514.2	4965	Rbl2	RB transcriptional corepressor like 2 (Rbl2), transcript variant X1, mRNA	7.28	-7.44	1.4e-20
XM_028874703.2	3032	Nfkb2	nuclear factor kappa B subunit 2 (Nfkb2), transcript variant X1, mRNA	22.13	2.35	2.1e-20
XM_028853955.2	3670	Mmp25	matrix metallopeptidase 25 (Mmp25), mRNA	81.78	3.41	2.4e-20
XM_028894486.2	5314	Dusp16	dual specificity phosphatase 16 (Dusp16), mRNA	12.98	2.74	2.6e-20
XM_028865640.2	2344	Slamf1	signaling lymphocytic activation molecule family member 1 (Slamf1), mRNA	41.61	2.62	3.3e-20
XM_028861600.2	2106	Sdr9c7	short chain dehydrogenase/reductase family 9C member 7 (Sdr9c7), mRNA	10.91	3.87	3.6e-20
XM_028865651.2	4521	Arid5a	AT-rich interaction domain 5A (Arid5a), transcript variant X4, mRNA	22.21	2.59	5.3e-20
XM_028888017.2	2725	Cfb	complement factor B (Cfb), mRNA	77.39	4.46	8.7e-20
XM_037204916.1	1546	Tfpi	tissue factor pathway inhibitor (Tfpi), transcript variant X3, mRNA	3.37	8.11	1.2e-19
XM_028884234.2	3506	Tmem132a	transmembrane protein 132A (Tmem132a), mRNA	15.21	2.66	1.5e-19
XM_028867203.2	2376	Sptssb	serine palmitoyltransferase small subunit B (Sptssb), mRNA	2.88	8.68	1.5e-19
XM_037199833.1	2966	Ncr2	natural cytotoxicity triggering receptor 2-like (LOC114702149), mRNA	81.33	2.97	1.8e-19
XM_028880025.2	2915	Tnip1	TNFAIP3 interacting protein 1 (Tnip1), transcript variant X4, mRNA	12.19	5.45	2e-19
XM_037203789.1	993	Tnip3	TNFAIP3 interacting protein 3 (Tnip3), transcript variant X2, mRNA	6.43	6.53	2.1e-19
XM_028858293.2	1546	Siglece	sialic acid-binding Ig-like lectin 12 (LOC114683921), transcript variant X1, mRNA	35.38	2.98	3e-19
XM_028863733.2	3356	Hk3	hexokinase 3 (Hk3), transcript variant X1, mRNA	159.98	3.25	3.8e-19
XM_037205047.1	3745	Cd44	CD44 molecule (Indian blood group) (Cd44), transcript variant X4, mRNA	9.06	3.15	4.3e-19
XM_028860502.2	2281	Aoah	acyloxyacyl hydrolase (Aoah), mRNA	72.65	2.51	6e-19
XM_037197113.1	8066	Arhgap26	Rho GTPase activating protein 26 (Arhgap26), transcript variant X2, mRNA	15.41	2.36	6.2e-19
XM_028858621.2	2385	Sav1	salvador family WW domain containing protein 1 (Sav1), transcript variant X1, mRNA	40.59	2.29	6.5e-19
XM_028892527.2	3193	Gramd2a	GRAM domain containing 2A (Gramd2a), transcript variant X2, mRNA	1.62	9.51	6.8e-19
XM_028872367.2	3967	Msr1	macrophage scavenger receptor 1 (Msr1), transcript variant X2, mRNA	21.43	4.62	7.3e-19
XM_028893401.2	1314	Il1b	interleukin 1 beta (Il1b), mRNA	2214.39	3.61	8.5e-19
XM_037207644.1	2125	St3gal4	ST3 beta-galactoside alpha-2,3-sialyltransferase 4 (St3gal4), transcript variant X8, mRNA	46.51	2.96	1e-18
XM_028863845.2	4407	Slc28a3	solute carrier family 28 member 3 (Slc28a3), mRNA	42.63	4.82	1.2e-18
XM_028890776.2	1515	Dap3	death associated protein 3 (Dap3), transcript variant X4, mRNA	16.84	3.18	1.2e-18
XM_028876006.2	2927	Sla	Src like adaptor (Sla), transcript variant X1, mRNA	62.22	2.5	1.3e-18
XM_028868678.2	1818	Il1rn	interleukin 1 receptor antagonist (Il1rn), transcript variant X4, mRNA	42.75	2.56	1.3e-18
XM_028871771.2	2031	Tes	testin LIM domain protein (Tes), mRNA	96.78	2.36	1.4e-18
XM_028860034.2	2335	Ltf	lactotransferrin (Ltf), mRNA	1201.08	5.52	1.7e-18
XM_037202347.1	2174	Tpd52	tumor protein D52 (Tpd52), transcript variant X7, mRNA	34.85	2.45	2.8e-18
XM_028890959.2	2548	Birc3	baculoviral IAP repeat-containing protein 3-like (LOC114708004), mRNA	81.02	2.4	3.3e-18
XM_037211435.1	2545	Ikbke	inhibitor of nuclear factor kappa B kinase subunit epsilon (Ikbke), transcript variant X5, mRNA	18.73	2.61	4.8e-18
XM_028854887.2	1562	Hmox1	heme oxygenase 1 (Hmox1), mRNA	65.29	2.57	7.4e-18
XM_028887499.2	960	Id1	inhibitor of DNA binding 1, HLH protein (Id1), transcript variant X1, mRNA	20.26	3.41	7.5e-18
XM_028856420.2	2845	Ugcg	UDP-glucose ceramide glucosyltransferase (Ugcg), mRNA	107.3	2.6	8.4e-18
XM_028866044.2	3508	Pxylp1	2-phosphoxylose phosphatase 1 (Pxylp1), transcript variant X7, mRNA	8.64	6.92	8.9e-18
XM_028871647.2	4438	Lhfpl2	LHFPL tetraspan subfamily member 2 (Lhfpl2), transcript variant X1, mRNA	2.14	4.39	9.2e-18
XM_037197284.1	8412	Tg	thyroglobulin (Tg), mRNA	1.02	4.54	9.8e-18
XM_028890975.2	2429	Mmp8	matrix metallopeptidase 8 (Mmp8), mRNA	983.96	5.78	1.1e-17
XM_028876483.2	2138	Fos	Fos proto-oncogene, AP-1 transcription factor subunit (Fos), mRNA	12.9	-2.9	1.1e-17
XM_028883763.2	3458	Tnfaip2	TNF alpha induced protein 2 (Tnfaip2), transcript variant X1, mRNA	23.49	3.53	1.7e-17
XM_028891387.2	4648	Pfkfb3	6-phosphofructo-2-kinase/fructose-2,6-biphosphatase 3 (Pfkfb3), transcript variant X8, mRNA	2.67	4.98	2.4e-17
XM_028875516.2	5462	Fmnl2	formin like 2 (Fmnl2), transcript variant X4, mRNA	1.43	9.73	2.5e-17
XM_028891336.2	4360	Pfkfb3	6-phosphofructo-2-kinase/fructose-2,6-biphosphatase 3 (Pfkfb3), transcript variant X3, mRNA	7.25	3.67	2.8e-17
XM_037211311.1	3221	Selp	selectin P (LOC114690001), mRNA	177.36	4.86	2.9e-17
XM_028881290.2	7460	Atp11a	ATPase phospholipid transporting 11A (Atp11a), transcript variant X2, mRNA	41.9	2.48	2.9e-17
XM_037197175.1	8244	Alpk2	alpha kinase 2 (Alpk2), mRNA	4.3	4.68	2.9e-17
XM_028860754.2	4838	Tnfaip3	TNF alpha induced protein 3 (Tnfaip3), transcript variant X1, mRNA	4.38	4.29	3.4e-17
XM_028870696.2	3537	Limk2	LIM domain kinase 2 (Limk2), transcript variant X1, mRNA	24.99	2.42	3.5e-17
XM_028862915.2	807	Gadd45b	growth arrest and DNA damage inducible beta (Gadd45b), mRNA	46.5	2.67	3.6e-17
XM_028888360.2	2915	Fkbp5	FKBP prolyl isomerase 5 (Fkbp5), transcript variant X1, mRNA	38.32	2.4	4.7e-17
XM_028859174.2	735	Gmfg	glia maturation factor gamma (Gmfg), transcript variant X2, mRNA	117.12	2.76	5.9e-17
XM_028891075.2	1298	Hp	haptoglobin (LOC114708077), mRNA	1120.11	3.58	7.3e-17
XM_028893909.2	6113	Cemip2	cell migration inducing hyaluronidase 2 (Cemip2), transcript variant X2, mRNA	23.37	2.35	8.2e-17
XM_028878137.2	2016	Rubcnl	rubicon like autophagy enhancer (Rubcnl), transcript variant X2, mRNA	50.03	2.29	8.3e-17
XM_037197637.1	4814	Csf2rb	colony stimulating factor 2 receptor subunit beta (Csf2rb), transcript variant X3, mRNA	18.17	3.57	8.3e-17
XM_028893405.2	2023	Il1a	interleukin 1 alpha (Il1a), mRNA	2.09	5.78	8.3e-17
XM_037197643.1	4506	Csf2rb	cytokine receptor common subunit beta-like (LOC114694224), transcript variant X1, mRNA	20.25	2.79	9.1e-17
XM_028859718.2	1310	Lrg1	leucine rich alpha-2-glycoprotein 1 (Lrg1), transcript variant X1, mRNA	261.51	4.64	1.1e-16
XM_028888907.2	4092	Tp53inp2	tumor protein p53 inducible nuclear protein 2 (Tp53inp2), transcript variant X1, mRNA	39.03	3.61	1.1e-16
XM_028879064.2	3015	St3gal4	ST3 beta-galactoside alpha-2,3-sialyltransferase 4 (St3gal4), transcript variant X4, mRNA	14.53	2.64	1.1e-16
XM_028862630.2	2302	Clec4e	C-type lectin domain family 4 member E (Clec4e), transcript variant X1, mRNA	33.54	2.92	1.2e-16
XM_028887539.2	2587	Bcl2l1	BCL2 like 1 (Bcl2l1), transcript variant X7, mRNA	15.5	2.55	1.2e-16
XM_028869232.2	3666	Cpne8	copine 8 (Cpne8), mRNA	8.9	3.31	1.3e-16
XM_037205927.1	2600	Inhba	inhibin subunit beta A (Inhba), transcript variant X2, mRNA	6.78	3.21	1.5e-16
XM_028871069.2	4502	Csf2rb	cytokine receptor common subunit beta-like (LOC114694224), transcript variant X3, mRNA	12.48	2.62	1.8e-16
XM_028864728.2	5145	Gca	grancalcin (Gca), mRNA	11.66	3.01	1.8e-16
XM_028878655.2	692	C4H15orf48	chromosome 4 C15orf48 homolog (C4H15orf48), mRNA	100.95	2.79	1.9e-16
XM_028865255.2	1937	Wipi1	WD repeat domain, phosphoinositide interacting 1 (Wipi1), mRNA	38.6	2.77	3.1e-16
XM_028892349.2	2621	C1rl	complement C1r subcomponent like (C1rl), mRNA	14.14	4.68	3.3e-16
XM_037206972.1	1524	C6H1orf162	chromosome 6 C1orf162 homolog (C6H1orf162), mRNA	13.64	3.25	3.3e-16
XM_037205723.1	2733	Nfil3	nuclear factor, interleukin 3 regulated (Nfil3), transcript variant X2, mRNA	23.89	2.85	3.4e-16
XM_028892550.2	2197	Pgs1	phosphatidylglycerophosphate synthase 1 (Pgs1), transcript variant X1, mRNA	35.48	2.16	3.6e-16
XM_028865650.2	4524	Arid5a	AT-rich interaction domain 5A (Arid5a), transcript variant X3, mRNA	14.48	2.36	5e-16
XM_028876009.2	3241	Sla	Src like adaptor (Sla), transcript variant X2, mRNA	187.04	2.53	5.4e-16
XM_037206840.1	4222	Pik3ap1	phosphoinositide-3-kinase adaptor protein 1 (Pik3ap1), transcript variant X2, mRNA	22.89	2.22	5.8e-16
XM_028864149.2	2556	Snx10	sorting nexin 10 (Snx10), transcript variant X1, mRNA	20.74	2.71	5.9e-16
XM_028885676.2	3103	Inpp5f	inositol polyphosphate-5-phosphatase F (Inpp5f), transcript variant X2, mRNA	18.97	2.27	6.1e-16
XM_028867272.1	747	Plac8	placenta associated 8 (Plac8), mRNA	1094.03	2.89	7.7e-16
XM_028855869.2	3165	Ehd1	EH domain containing 1 (Ehd1), mRNA	100.93	2.56	1.4e-15
XM_037208258.1	1660	Mmp27	matrix metallopeptidase 27 (Mmp27), mRNA	4.61	6.37	1.6e-15
XM_028884147.2	1665	Msra	methionine sulfoxide reductase A (Msra), transcript variant X1, mRNA	29.89	2.96	2.1e-15
XM_028879113.1	2765	Macir	macrophage immunometabolism regulator (Macir), transcript variant X1, mRNA	14.93	2.49	2.2e-15
XM_028853710.2	881	Prdx5	peroxiredoxin 5 (Prdx5), mRNA	157.61	2.34	2.8e-15
XM_028890539.2	1392	Ca4	carbonic anhydrase 4 (Ca4), mRNA	12.51	5.07	2.8e-15
XM_028873528.2	1548	Pnp	purine nucleoside phosphorylase (LOC114696009), mRNA	230.41	2.91	2.9e-15
XM_028862085.2	2703	Cd177	CD177 molecule (Cd177), mRNA	49.97	4.4	3.2e-15
XM_028882711.2	4071	Stxbp6	syntaxin binding protein 6 (Stxbp6), mRNA	3.59	4.81	3.7e-15
XM_028881407.2	4426	Cybb	cytochrome b-245 heavy chain (LOC114701319), mRNA	349.15	2.57	4.7e-15
XM_028871982.2	1166	Pstpip2	proline-serine-threonine phosphatase interacting protein 2 (Pstpip2), mRNA	53.61	2.64	4.8e-15
XM_028874705.2	3029	Nfkb2	nuclear factor kappa B subunit 2 (Nfkb2), transcript variant X3, mRNA	20.02	2.2	5.8e-15
XM_028877491.2	2329	Dgat2	diacylglycerol O-acyltransferase 2 (Dgat2), transcript variant X2, mRNA	58.03	3.38	5.9e-15
XM_028888721.2	2452	Smtnl2	smoothelin like 2 (Smtnl2), transcript variant X1, mRNA	47.81	3.59	6e-15
XM_028875599.2	5160	Osmr	oncostatin M receptor (Osmr), transcript variant X1, mRNA	1.38	6.75	6.8e-15
XM_028887322.2	3958	Il13ra1	interleukin 13 receptor subunit alpha 1 (Il13ra1), mRNA	77.54	2.64	8.1e-15
XM_028863790.2	2770	Nfil3	nuclear factor, interleukin 3 regulated (Nfil3), transcript variant X1, mRNA	17.11	2.8	8.4e-15
XM_028891860.2	3843	Optn	optineurin (Optn), mRNA	27.09	2	8.6e-15
XM_028853958.2	890	Msrb1	methionine sulfoxide reductase B1 (Msrb1), mRNA	389.01	2.92	8.9e-15
XM_028862233.2	3121	Junb	JunB proto-oncogene, AP-1 transcription factor subunit (Junb), mRNA	53.1	2.35	9e-15
XM_028878206.2	6544	Zc3h13	zinc finger CCCH-type containing 13 (Zc3h13), transcript variant X3, mRNA	10.86	2.15	9.2e-15
XM_037201212.1	1171	RIKEN cDNA 1810065E05, isoform CRA_a	protein RoBo-1-like (LOC114686457), transcript variant X1, mRNA	141.38	4.34	1.3e-14
XM_028867308.2	2077	Tank	TRAF family member associated NFKB activator (Tank), transcript variant X2, mRNA	29.07	2.11	1.3e-14
XM_037200800.1	1774	Cd300lf	CD300 molecule like family member f (Cd300lf), transcript variant X2, mRNA	22.9	2.83	1.6e-14
XM_028888153.2	3335	Ptafr	platelet activating factor receptor (Ptafr), mRNA	54.23	2.38	1.8e-14
XM_028885034.2	2618	Pim1	Pim-1 proto-oncogene, serine/threonine kinase (Pim1), mRNA	162.78	2.29	1.9e-14
XM_028855812.2	2605	Rnf19b	ring finger protein 19B (Rnf19b), mRNA	46.11	1.94	2e-14
XM_028858088.2	4696	Hif1a	hypoxia inducible factor 1 subunit alpha (Hif1a), transcript variant X3, mRNA	24.9	2.29	2.1e-14
XM_028854938.2	1405	C5ar1	complement C5a receptor 1 (C5ar1), mRNA	151.5	2.6	2.3e-14
XM_028887457.2	5499	Plagl2	PLAG1 like zinc finger 2 (Plagl2), transcript variant X1, mRNA	33.25	2.32	2.3e-14
XM_037201568.1	2476	Flot2	flotillin 2 (Flot2), transcript variant X6, mRNA	21.96	2.76	2.3e-14
XM_037197636.1	4811	Csf2rb	colony stimulating factor 2 receptor subunit beta (Csf2rb), transcript variant X2, mRNA	41.95	3.04	2.6e-14
XR_005092490.1	1130	LOC119088771	uncharacterized LOC119088771 (LOC119088771), transcript variant X2, misc_RNA	302.16	2.45	4e-14
XM_028878524.2	2094	Sdcbp	syndecan binding protein (LOC114699452), transcript variant X2, mRNA	211.5	2.19	6.5e-14
XM_028893871.2	2199	Relb	RELB proto-oncogene, NF-kB subunit (Relb), transcript variant X1, mRNA	18.94	2.43	7.6e-14
XM_028855928.2	1555	Cdc42ep2	CDC42 effector protein 2 (Cdc42ep2), mRNA	16.71	2.72	7.7e-14
XM_028887461.2	2105	Hck	HCK proto-oncogene, Src family tyrosine kinase (Hck), mRNA	205.13	2.28	9.4e-14
XM_028873150.2	5350	Antxr2	ANTXR cell adhesion molecule 2 (Antxr2), transcript variant X1, mRNA	38.72	2.23	1.1e-13
XR_005089974.1	1123	LOC114706499	uncharacterized LOC114706499 (LOC114706499), ncRNA	262.75	2.75	1.3e-13
XM_028856800.2	4708	Stat3	signal transducer and activator of transcription 3 (Stat3), transcript variant X2, mRNA	21.83	1.99	1.3e-13
XM_028869112.2	2439	Igf2bp1	insulin like growth factor 2 mRNA binding protein 1 (Igf2bp1), transcript variant X1, mRNA	1	6.74	1.3e-13
XM_028873432.2	3653	Picalm	phosphatidylinositol binding clathrin assembly protein (Picalm), transcript variant X11, mRNA	73.47	2.41	1.5e-13
XM_028884355.2	2706	Plk2	polo like kinase 2 (Plk2), mRNA	8.8	2.73	1.5e-13
XM_028856865.2	1460	Tmem106a	transmembrane protein 106A (Tmem106a), transcript variant X1, mRNA	30.54	2.77	1.6e-13
XM_028869439.2	6965	Kdm6b	lysine demethylase 6B (Kdm6b), transcript variant X5, mRNA	4.1	2.46	1.8e-13
XM_028858079.2	4699	Hif1a	hypoxia inducible factor 1 subunit alpha (Hif1a), transcript variant X2, mRNA	23.89	2.29	1.9e-13
XR_005090216.1	582	LOC119086850	uncharacterized LOC119086850 (LOC119086850), transcript variant X2, ncRNA	5.41	7.65	1.9e-13
XM_028882006.2	2124	Dhrs9	dehydrogenase/reductase 9 (Dhrs9), mRNA	50.01	2.77	2e-13
XM_028887933.2	1622	Tnf	tumor necrosis factor (Tnf), mRNA	24.9	2.64	2.2e-13
XM_028860051.2	2790	Rtp3	receptor transporter protein 3 (Rtp3), transcript variant X1, mRNA	1.54	7.54	2.2e-13
XM_037210817.1	3482	Il4r	interleukin 4 receptor (Il4r), transcript variant X1, mRNA	6.85	2.66	2.4e-13
XM_028872298.2	1365	Rab20	RAB20, member RAS oncogene family (Rab20), transcript variant X1, mRNA	15.62	3.23	2.6e-13
XM_028871143.2	2086	Maff	MAF bZIP transcription factor F (Maff), transcript variant X2, mRNA	5.72	4.59	2.8e-13
XR_005090261.1	1132	LOC119086876	uncharacterized LOC119086876 (LOC119086876), ncRNA	15.49	3.61	3.1e-13
XM_037203531.1	1256	Steap1	STEAP family member 1 (Steap1), transcript variant X2, mRNA	6.95	11.65	3.1e-13
XM_028892501.2	2984	Pml	PML nuclear body scaffold (Pml), transcript variant X1, mRNA	21.59	2.11	3.2e-13
XM_028866978.2	926	Ccl7	C-C motif chemokine 7-like (LOC114691549), mRNA	7.64	5.24	3.5e-13
XM_037199929.1	1311	Trem4	triggering receptor expressed on myeloid cells 1-like (LOC114705361), transcript variant X1, mRNA	43.76	3.31	4e-13
XM_028893379.2	4270	Mertk	MER proto-oncogene, tyrosine kinase (Mertk), mRNA	8.38	4.27	4.4e-13
XM_028861698.2	1779	Flot1	flotillin 1 (Flot1), mRNA	152.71	2.25	4.7e-13
XM_037199711.1	1393	Il1r2	interleukin 1 receptor type 2 (Il1r2), transcript variant X3, mRNA	7.87	6.5	5.8e-13
XM_028886872.2	758	Ngp	neutrophilic granule protein-like (LOC114705177), mRNA	1460.28	3.2	5.9e-13
XM_028878737.2	2908	Slc28a2	solute carrier family 28 member 2 (Slc28a2), mRNA	138.47	3.59	5.9e-13
XM_037202374.1	1213	Sirpb1	signal-regulatory protein beta-1-like (LOC114704110), transcript variant X2, mRNA	98.98	2.71	5.9e-13
XM_028892637.2	2589	Gsdme	gasdermin E (Gsdme), mRNA	1.47	4.67	5.9e-13
XM_037202431.1	2017	Sdcbp	syndecan binding protein (LOC114699452), transcript variant X1, mRNA	151.61	2.13	6.1e-13
XM_028883747.2	1481	Ckb	creatine kinase B (Ckb), transcript variant X1, mRNA	45.11	2.12	6.5e-13
XM_028871497.2	1929	Ces1d	carboxylesterase 1D (LOC114694527), mRNA	19.61	2.7	6.6e-13
XM_037201058.1	1523	Nlrp1a	NACHT, LRR and PYD domains-containing protein 1a-like (LOC119086956), mRNA	27.63	1.91	6.9e-13
XM_028889392.2	4625	Pik3ap1	phosphoinositide-3-kinase adaptor protein 1 (Pik3ap1), transcript variant X1, mRNA	60.57	2.4	7.2e-13
XM_028891125.2	3300	Net1	neuroepithelial cell transforming 1 (Net1), transcript variant X2, mRNA	55.45	2.71	7.6e-13
XM_028865632.2	1051	Crp	C-reactive protein (LOC114690747), mRNA	13.57	4.55	7.6e-13
XM_028878069.2	927	Alox5ap	arachidonate 5-lipoxygenase activating protein (LOC114699150), transcript variant X1, mRNA	252.98	2.39	8.1e-13
XM_037206298.1	2264	Osgin1	oxidative stress induced growth inhibitor 1 (Osgin1), transcript variant X3, mRNA	15.4	2.81	8.2e-13
XM_028891931.2	4316	Vdr	vitamin D receptor (Vdr), mRNA	4.52	4.28	8.6e-13
XM_028875541.2	4178	Nt5e	5'-nucleotidase ecto (Nt5e), mRNA	22.03	3.17	8.9e-13
XM_028895337.2	2126	Hyal2	hyaluronidase 2 (Hyal2), transcript variant X2, mRNA	5.26	2.98	9.2e-13
XM_028884064.2	3840	Ddx58	DExD/H-box helicase 58 (Ddx58), transcript variant X1, mRNA	28.02	2.31	1.1e-12
XM_028859188.2	1666	Zfp36	ZFP36 ring finger protein (Zfp36), mRNA	251.45	2.21	1.3e-12
XM_028868449.2	2365	Sdc4	syndecan 4 (Sdc4), mRNA	138.36	4.42	1.3e-12
XM_028893766.2	1495	Anxa1	annexin A1 (Anxa1), mRNA	1304.72	2.97	1.4e-12
XM_028894284.2	5023	Tlr2	toll like receptor 2 (Tlr2), transcript variant X1, mRNA	30.02	2.65	1.4e-12
XM_037197644.1	4559	Csf2rb	cytokine receptor common subunit beta-like (LOC114694224), transcript variant X2, mRNA	19.7	2.78	1.4e-12
XM_028872074.2	3018	Cd200r1	cell surface glycoprotein CD200 receptor 1-like (LOC114694962), mRNA	11.57	2.16	1.4e-12
XM_028875814.2	6169	Slc2a2	solute carrier family 2 member 2 (Slc2a2), mRNA	0.39	5.84	1.4e-12
XM_028876897.2	897	Ppp1r3b	protein phosphatase 1 regulatory subunit 3B (Ppp1r3b), mRNA	17.75	3.13	1.5e-12
XM_028878785.2	1252	Sds	serine dehydratase (Sds), mRNA	166.36	2.99	1.6e-12
XM_028892179.2	2341	Ltb4r	leukotriene B4 receptor (Ltb4r), mRNA	37.75	2.49	1.6e-12
XM_037197343.1	2663	Krt2	keratin 2 (Krt2), mRNA	5.41	-4.21	1.6e-12
XM_028894751.2	1846	Glipr2	GLI pathogenesis related 2 (Glipr2), mRNA	151.82	2.19	1.7e-12
XM_028871551.2	2004	Adgrg3	adhesion G protein-coupled receptor G3 (Adgrg3), mRNA	31.5	2.65	1.8e-12
XM_028889626.2	1791	Cd300lf	CD300 molecule like family member f (Cd300lf), transcript variant X3, mRNA	93.41	2.5	1.9e-12
XM_037203031.1	2412	Fgr	FGR proto-oncogene, Src family tyrosine kinase (Fgr), transcript variant X6, mRNA	23.96	2.22	1.9e-12
XM_028859919.2	2285	Pram1	PML-RARA regulated adaptor molecule 1 (Pram1), transcript variant X7, mRNA	53.82	3.09	2.3e-12
XR_005090215.1	990	LOC119086850	uncharacterized LOC119086850 (LOC119086850), transcript variant X1, ncRNA	3.85	8.74	2.3e-12
XM_028893099.2	2185	Slc11a1	solute carrier family 11 member 1 (Slc11a1), transcript variant X1, mRNA	177.92	2.35	2.6e-12
XM_037197270.1	1636	Gpr84	G protein-coupled receptor 84 (Gpr84), transcript variant X1, mRNA	3.09	5.87	3e-12
XM_037197952.1	2450	Pram1	PML-RARA regulated adaptor molecule 1 (Pram1), transcript variant X2, mRNA	18.19	2.64	3.4e-12
XM_037208124.1	2039	Osm	oncostatin M (Osm), mRNA	10.4	2.78	3.4e-12
XM_028854590.2	2929	Ccdc154	coiled-coil domain containing 154 (Ccdc154), transcript variant X8, mRNA	4.07	3.58	3.4e-12
XM_028874633.2	3188	Slc5a6	solute carrier family 5 member 6 (Slc5a6), mRNA	13.68	3.06	3.6e-12
XM_037202226.1	1398	Tarm1	T-cell-interacting, activating receptor on myeloid cells protein 1-like (LOC114687526), mRNA	40.34	2.48	3.8e-12
XM_028894620.2	4964	Dennd5a	DENN domain containing 5A (Dennd5a), transcript variant X1, mRNA	97.39	2	4.4e-12
XM_028855518.1	3137	Rnf41	ring finger protein 41 (Rnf41), transcript variant X1, mRNA	12.39	2.05	4.6e-12
XM_037202022.1	1872	Gbp2	guanylate-binding protein 2-like (LOC114681715), mRNA	84.38	2.87	4.9e-12
XM_028886497.1	2555	Slc2a1	solute carrier family 2 member 1 (Slc2a1), transcript variant X1, mRNA	19.16	2.36	5e-12
XM_037205487.1	8092	Helz2	helicase with zinc finger 2 (Helz2), transcript variant X2, mRNA	19.28	2.24	5.1e-12
XM_037202257.1	1660	Fpr1	formyl peptide receptor 1 (Fpr1), transcript variant X3, mRNA	9.93	6.53	5.1e-12
XM_028873276.2	3292	Eif2ak2	eukaryotic translation initiation factor 2 alpha kinase 2 (Eif2ak2), mRNA	21.32	2.05	5.3e-12
XM_028888908.2	3973	Tp53inp2	tumor protein p53 inducible nuclear protein 2 (Tp53inp2), transcript variant X3, mRNA	14.76	2.85	5.3e-12
XM_028872315.2	3986	Efnb2	ephrin B2 (Efnb2), mRNA	11.49	4.2	5.4e-12
XM_037202322.1	2167	Hes3	hes family bHLH transcription factor 3 (Hes3), transcript variant X2, mRNA	6.4	5.53	5.5e-12
XM_028868977.2	3476	Xylt2	xylosyltransferase 2 (Xylt2), transcript variant X1, mRNA	15.83	-2.14	5.7e-12
XM_028888361.2	2867	Fkbp5	FKBP prolyl isomerase 5 (Fkbp5), transcript variant X2, mRNA	18.65	2.24	5.9e-12
XM_028886779.2	3695	Ctnna1	catenin alpha 1 (Ctnna1), transcript variant X1, mRNA	17.12	1.86	6.1e-12
XM_028866043.1	3303	Pxylp1	2-phosphoxylose phosphatase 1 (Pxylp1), transcript variant X6, mRNA	1.47	6.82	6.4e-12
XM_028873486.2	1464	Rnase10	ribonuclease A family member 10 (inactive) (Rnase10), mRNA	1.43	8.37	6.4e-12
XM_037209868.1	1006	Igf2bp2	insulin-like growth factor 2 mRNA-binding protein 2 (LOC119088820), mRNA	5.06	4.38	7.1e-12
XM_037206065.1	6510	N4bp1	NEDD4 binding protein 1 (N4bp1), transcript variant X2, mRNA	2.91	3.71	7.2e-12
XM_037200947.1	2960	Lpo	lactoperoxidase (LOC114699258), transcript variant X2, mRNA	2.38	11.47	7.3e-12
XM_037203889.1	2704	Mxd1	MAX dimerization protein 1 (Mxd1), transcript variant X1, mRNA	60.27	2.41	7.5e-12
XR_005091189.1	1295	Rassf4	Ras association domain family member 4 (Rassf4), transcript variant X3, misc_RNA	2.18	6.69	7.8e-12
XM_028870926.2	1759	Grina	glutamate ionotropic receptor NMDA type subunit associated protein 1 (Grina), mRNA	135.37	1.9	8.3e-12
XM_028880607.2	2425	Nfe2l2	nuclear factor, erythroid 2 like 2 (Nfe2l2), transcript variant X1, mRNA	61.44	2.35	9.2e-12
XM_037207724.1	2376	Icam1	intercellular adhesion molecule 1 (Icam1), transcript variant X2, mRNA	3.44	3.8	9.4e-12
XM_028857368.2	756	Retn	resistin (Retn), mRNA	43.86	3.4	9.7e-12
XM_028891327.2	2817	Cd36	CD36 molecule (Cd36), transcript variant X1, mRNA	15.75	-2.27	9.8e-12
XM_028854790.2	2219	Oas1	2'-5'-oligoadenylate synthase-like protein 1 (LOC114681337), mRNA	50.27	2.74	1.1e-11
XM_037201202.1	6099	Abca6	ATP binding cassette subfamily A member 6 (Abca6), transcript variant X1, mRNA	5.9	-3.18	1.1e-11
XM_037205570.1	1964	B4galt5	beta-1,4-galactosyltransferase 5 (B4galt5), transcript variant X2, mRNA	57.67	2.2	1.3e-11
XM_028877562.1	5176	Arap1	ArfGAP with RhoGAP domain, ankyrin repeat and PH domain 1 (Arap1), transcript variant X6, mRNA	23.85	2.18	1.3e-11
XM_037203028.1	2472	Fgr	FGR proto-oncogene, Src family tyrosine kinase (Fgr), transcript variant X3, mRNA	19.63	2.16	1.3e-11
XM_037203890.1	2899	Mxd1	MAX dimerization protein 1 (Mxd1), transcript variant X2, mRNA	82.47	2.38	1.4e-11
XM_028877493.1	2019	Dgat2	diacylglycerol O-acyltransferase 2 (Dgat2), transcript variant X4, mRNA	42.53	3.5	1.6e-11
XM_028869440.2	6744	Kdm6b	lysine demethylase 6B (Kdm6b), transcript variant X4, mRNA	6.04	2.09	1.6e-11
XM_028895348.2	844	Manf	mesencephalic astrocyte derived neurotrophic factor (Manf), mRNA	65.24	1.76	1.7e-11
XM_037210868.1	4867	Tnfaip2	TNF alpha induced protein 2 (Tnfaip2), transcript variant X3, mRNA	2.75	3.39	1.7e-11
XM_028891010.2	16758	Abca13	ATP binding cassette subfamily A member 13 (Abca13), mRNA	1.71	4.68	1.7e-11
XM_028858457.2	3289	H6pd	hexose-6-phosphate dehydrogenase/glucose 1-dehydrogenase (H6pd), transcript variant X2, mRNA	22.56	2.38	1.8e-11
XM_028857921.2	4052	Gk	glycerol kinase (Gk), transcript variant X5, mRNA	22.21	2.07	1.8e-11
XM_028857838.2	1393	Clec4a	C-type lectin domain family 4 member A-like (LOC114683505), mRNA	19.1	2.31	1.8e-11
XM_028856943.2	2145	Sgms2	sphingomyelin synthase 2 (Sgms2), transcript variant X3, mRNA	4.67	3.14	1.8e-11
XM_028894162.2	2557	Rtn4rl2	reticulon 4 receptor like 2 (Rtn4rl2), transcript variant X1, mRNA	1.17	6.03	1.8e-11
XM_028877912.2	4309	Abtb2	ankyrin repeat and BTB domain containing 2 (Abtb2), mRNA	9.89	2.09	1.9e-11
XM_028880030.2	2695	Tnip1	TNFAIP3 interacting protein 1 (Tnip1), transcript variant X10, mRNA	5.14	3.89	1.9e-11
XM_028886359.2	3307	Itgb5	integrin subunit beta 5 (Itgb5), mRNA	8.55	-2.45	2e-11
XM_028877159.2	3288	Klf5	Kruppel like factor 5 (Klf5), transcript variant X1, mRNA	4.33	3.88	2.2e-11
XR_005092491.1	1323	LOC119088771	uncharacterized LOC119088771 (LOC119088771), transcript variant X3, misc_RNA	105.72	2.22	2.3e-11
XM_028868580.2	1782	Ptpn1	protein tyrosine phosphatase non-receptor type 1 (Ptpn1), mRNA	95.71	1.83	2.6e-11
XM_028890108.2	1831	Smim3	small integral membrane protein 3 (Smim3), transcript variant X1, mRNA	19.42	2.79	2.7e-11
XM_028856799.2	4711	Stat3	signal transducer and activator of transcription 3 (Stat3), transcript variant X1, mRNA	77.49	1.89	2.9e-11
XM_028875467.2	2565	Ldlrap1	low density lipoprotein receptor adaptor protein 1 (Ldlrap1), transcript variant X1, mRNA	18.53	-1.83	3e-11
XM_028854666.2	1092	Tpsb2	tryptase beta-2-like (LOC114681248), mRNA	21.4	3.56	3.3e-11
XM_037197825.1	4637	Sbno2	strawberry notch homolog 2 (Sbno2), transcript variant X2, mRNA	30.05	4.07	3.4e-11
XM_028867461.2	2164	Dipk1a	divergent protein kinase domain 1A (Dipk1a), mRNA	25.94	-1.79	3.7e-11
XM_028886840.2	1641	Cd14	CD14 molecule (Cd14), mRNA	474.6	2.74	3.9e-11
XM_028879753.2	3262	Galnt3	polypeptide N-acetylgalactosaminyltransferase 3 (Galnt3), mRNA	17.51	2.83	3.9e-11
XM_028867208.2	2222	B3galnt1	beta-1,3-N-acetylgalactosaminyltransferase 1 (globoside blood group) (B3galnt1), transcript variant X3, mRNA	3.83	4.77	4e-11
XM_028881292.2	3780	Atp11a	ATPase phospholipid transporting 11A (Atp11a), transcript variant X4, mRNA	2.96	3.24	4.3e-11
XM_028857366.2	1284	Mcemp1	mast cell expressed membrane protein 1 (Mcemp1), mRNA	160.99	3.16	4.4e-11
XM_037201589.1	1520	Litaf	lipopolysaccharide induced TNF factor (Litaf), transcript variant X3, mRNA	20.87	3.51	4.4e-11
XM_028854957.2	2760	C5ar2	complement component 5a receptor 2 (C5ar2), mRNA	16.43	2.64	4.5e-11
XM_028880275.2	3434	Txnrd1	thioredoxin reductase 1 (Txnrd1), transcript variant X2, mRNA	14.22	2.45	4.7e-11
XM_028868478.2	2395	Mmp9	matrix metallopeptidase 9 (Mmp9), mRNA	527.2	3.16	4.9e-11
XM_028864259.2	1733	Nipal1	NIPA like domain containing 1 (Nipal1), mRNA	17.29	-2.21	4.9e-11
XM_037207142.1	2703	Gbp1	guanylate-binding protein 1-like (LOC114689226), transcript variant X2, mRNA	19.87	2.63	5e-11
XM_028884143.2	8855	Kif13b	kinesin family member 13B (Kif13b), transcript variant X1, mRNA	5.29	1.79	5e-11
XM_037206473.1	1859	Ces1h	carboxylesterase 1H precursor [Mus musculus]; carboxylesterase 1E-like (LOC114694563), mRNA	14.67	2.57	5.5e-11
XM_028874532.2	3496	Acvrl1	activin A receptor like type 1 (Acvrl1), transcript variant X6, mRNA	0.55	8.13	5.5e-11
XM_037206979.1	701	Cd53	leukocyte surface antigen CD53 (LOC114700010), mRNA	182.77	1.77	5.8e-11
XM_037200423.1	1514	Arg1	arginase 1 (Arg1), transcript variant X2, mRNA	1084.13	2.93	6.4e-11
XM_028895244.2	3649	Herc6	HECT and RLD domain containing E3 ubiquitin protein ligase family member 6 (Herc6), transcript variant X1, mRNA	9.82	2.72	6.4e-11
XM_028880787.2	4080	Crispld2	cysteine rich secretory protein LCCL domain containing 2 (Crispld2), mRNA	23.9	2.26	6.5e-11
XM_037200605.1	3805	Mefv	MEFV innate immuity regulator, pyrin (Mefv), transcript variant X2, mRNA	14.91	2.35	6.6e-11
XM_028854149.2	13118	Vcan	versican (Vcan), transcript variant X1, mRNA	1.34	3.25	6.8e-11
XM_028861203.2	5128	C3	complement C3 (C3), transcript variant X1, mRNA	500.81	2.72	8.4e-11
XM_028875068.2	2278	Pdcd4	programmed cell death 4 (Pdcd4), transcript variant X1, mRNA	44.52	-1.99	8.4e-11
XM_028876501.2	3255	Ikbke	inhibitor of nuclear factor kappa B kinase subunit epsilon (Ikbke), transcript variant X3, mRNA	67.37	1.94	8.9e-11
XM_028857098.2	8542	Ncor1	nuclear receptor corepressor 1 (Ncor1), transcript variant X9, mRNA	0.46	10.79	9.1e-11
XM_028875016.2	2071	Nox1	NADPH oxidase 1 (Nox1), mRNA	3.64	3.53	9.2e-11
XM_028881295.2	5861	Atp11a	ATPase phospholipid transporting 11A (Atp11a), transcript variant X8, mRNA	8.54	2.25	1e-10
XM_028853878.2	1186	Atp6v0c	ATPase H+ transporting V0 subunit c (Atp6v0c), mRNA	207.41	1.89	1.1e-10
XM_028856793.2	2860	Nek6	NIMA related kinase 6 (Nek6), transcript variant X5, mRNA	20.17	2.24	1.1e-10
XM_028892503.2	6077	Pml	PML nuclear body scaffold (Pml), transcript variant X3, mRNA	3.65	2.4	1.1e-10
XM_028854586.2	4170	Clcn7	chloride voltage-gated channel 7 (Clcn7), transcript variant X1, mRNA	26.14	1.85	1.2e-10
XM_028873346.2	5206	Foxo1	forkhead box O1 (Foxo1), mRNA	25.75	-1.79	1.2e-10
XM_028866979.2	825	Ccl2	C-C motif chemokine 2-like (LOC114691550), mRNA	12.6	4.94	1.2e-10
XM_028863293.2	6560	Klhl3	kelch like family member 3 (Klhl3), mRNA	3.86	-2.69	1.2e-10
XM_037203532.1	1178	Steap1	STEAP family member 1 (Steap1), transcript variant X3, mRNA	2.78	6.94	1.2e-10
XM_028857817.2	3924	Slc2a3	solute carrier family 2 member 3 (Slc2a3), transcript variant X3, mRNA	203.86	2.77	1.3e-10
XM_028888871.2	546	Clec4a2	C-type lectin domain family 4 member A-like (LOC114706473), transcript variant X2, mRNA	96.07	2.58	1.3e-10
XM_028865763.2	4672	Rnf149	ring finger protein 149 (Rnf149), mRNA	22.74	1.81	1.3e-10
XM_028867903.2	3465	Il4r	interleukin 4 receptor (Il4r), transcript variant X3, mRNA	55.8	1.77	1.5e-10
XM_028893824.2	3003	Eml2	EMAP like 2 (Eml2), mRNA	15.08	1.98	1.5e-10
XM_037203029.1	2543	Fgr	FGR proto-oncogene, Src family tyrosine kinase (Fgr), transcript variant X4, mRNA	8.58	3.73	1.5e-10
XM_037200101.1	2797	Ctu1	cytosolic thiouridylase subunit 1 (Ctu1), transcript variant X4, mRNA	3.36	4.12	1.5e-10
XM_028883166.2	3546	Cmpk2	cytidine/uridine monophosphate kinase 2 (Cmpk2), mRNA	15.87	2.26	1.6e-10
XM_028855361.2	2950	Gbp2b	guanylate-binding protein 1-like (LOC114681707), transcript variant X1, mRNA	13.65	3.27	1.7e-10
XM_037199255.1	6878	Dock11	dedicator of cytokinesis 11 (Dock11), transcript variant X1, mRNA	11.26	-1.7	1.8e-10
XM_028858184.2	1528	Hpx	hemopexin (Hpx), mRNA	4.38	4.82	1.8e-10
XM_028874775.2	2385	Samsn1	SAM domain, SH3 domain and nuclear localization signals 1 (Samsn1), transcript variant X1, mRNA	76.59	1.83	1.9e-10
XM_028876098.2	2549	Samd15	sterile alpha motif domain containing 15 (Samd15), mRNA	2.32	3.61	1.9e-10
XM_028891607.2	1991	Serpinb2	serpin family B member 2 (Serpinb2), transcript variant X1, mRNA	151.65	5.09	2.1e-10
XM_037209373.1	1001	Basp1	brain abundant membrane attached signal protein 1 (Basp1), mRNA	13.59	3	2.1e-10
XM_028882412.2	3644	Arhgef3	Rho guanine nucleotide exchange factor 3 (Arhgef3), transcript variant X3, mRNA	44	1.65	2.2e-10
XM_028890155.2	1800	Snx7	sorting nexin 7 (Snx7), mRNA	4.42	3.84	2.2e-10
XM_028871495.2	1856	Ces1g	liver carboxylesterase 1-like (LOC114694525), mRNA	11.29	2.89	2.3e-10
XM_028877410.2	2147	Stx7	syntaxin 7 (Stx7), transcript variant X1, mRNA	41.68	1.82	2.4e-10
XM_028885715.2	2042	Cflar	CASP8 and FADD like apoptosis regulator (Cflar), transcript variant X5, mRNA	13.6	2.57	2.5e-10
XM_028876971.2	1929	Acsl4	acyl-CoA synthetase long chain family member 4 (Acsl4), mRNA	25.37	2.06	2.7e-10
XM_037201655.1	5468	Ciita	class II major histocompatibility complex transactivator (Ciita), transcript variant X5, mRNA	16.4	-2.26	2.7e-10
XM_028855305.2	1788	Ffar2	free fatty acid receptor 2 (Ffar2), transcript variant X1, mRNA	6.81	2.99	2.8e-10
XM_037200889.1	1010	Prss29	serine protease 29-like (LOC114681260), transcript variant X3, mRNA	11.72	3.79	3e-10
XM_037203506.1	1908	Tfec	transcription factor EC (Tfec), transcript variant X2, mRNA	2.83	4.16	3.1e-10
XM_028876496.1	2880	Mapkapk2	MAPK activated protein kinase 2 (Mapkapk2), mRNA	95.42	1.81	3.3e-10
XM_028878191.2	6547	Zc3h13	zinc finger CCCH-type containing 13 (Zc3h13), transcript variant X1, mRNA	10.42	2.53	3.5e-10
XM_028882108.2	1411	Serpinb1	serpin family B member 1 (Serpinb1), transcript variant X1, mRNA	433.16	3.21	3.8e-10
XM_028886324.2	3582	Hacd2	3-hydroxyacyl-CoA dehydratase 2 (Hacd2), mRNA	9.56	2.11	3.9e-10
XM_028858071.2	4702	Hif1a	hypoxia inducible factor 1 subunit alpha (Hif1a), transcript variant X1, mRNA	15.23	2.12	4.2e-10
XM_028871685.2	5345	Cert1	ceramide transporter 1 (Cert1), transcript variant X2, mRNA	22.58	1.97	4.3e-10
XM_028861396.2	1920	Lair1	leukocyte-associated immunoglobulin-like receptor 1 (LOC114686729), mRNA	4.58	3.18	4.4e-10
XM_028884543.2	4485	Snx18	sorting nexin 18 (Snx18), mRNA	26.19	2.04	4.6e-10
XM_037196870.1	3238	Txnrd1	thioredoxin reductase 1 (Txnrd1), transcript variant X4, mRNA	25.53	1.71	4.7e-10
XM_028875567.2	1744	Ccdc152	coiled-coil domain containing 152 (Ccdc152), mRNA	15.48	-2.04	4.8e-10
XM_028881868.2	4390	Rin2	Ras and Rab interactor 2 (Rin2), transcript variant X6, mRNA	10.11	1.96	4.8e-10
XM_037201870.1	1913	Nlrp1a	NACHT, LRR and PYD domains-containing protein 1-like (LOC114689440), mRNA	20.47	-1.86	5.3e-10
XM_028869155.2	6374	Plxnb2	plexin B2 (Plxnb2), transcript variant X1, mRNA	11.96	-2.17	5.3e-10
XM_028888036.2	2481	Tmem61	transmembrane protein 61 (Tmem61), mRNA	1.81	4.83	5.3e-10
XM_028875055.2	2901	Add3	adducin 3 (Add3), transcript variant X2, mRNA	18.29	-2.43	6.1e-10
XM_028865641.2	1179	Itln1	intelectin-1a-like (LOC114690754), transcript variant X1, mRNA	5.21	11.12	6.2e-10
XM_028887864.2	4344	Tlr4	toll like receptor 4 (Tlr4), transcript variant X2, mRNA	24.87	2.1	6.9e-10
XM_037201163.1	522	Havcr1	hepatitis A virus cellular receptor 1 homolog (LOC114689864), mRNA	94.72	3.59	7.1e-10
XM_028882340.1	6732	Kiaa0232	KIAA0232 ortholog (Kiaa0232), transcript variant X3, mRNA	6.71	1.83	7.4e-10
XM_028858560.2	3641	Midn	midnolin (Midn), transcript variant X3, mRNA	30.74	1.85	7.5e-10
XM_028872304.2	6472	Irs2	insulin receptor substrate 2 (Irs2), mRNA	9.33	1.93	8e-10
XM_028860703.2	3882	Evi5l	ecotropic viral integration site 5 like (Evi5l), transcript variant X4, mRNA	19.59	-1.69	8.1e-10
XM_028871493.2	2002	Ces1d	carboxylesterase 1D-like (LOC114694523), mRNA	13.02	2.35	8.4e-10
XM_028890852.2	461	S100a8	protein S100-A8-like (LOC114707940), mRNA	19982.2	2.73	8.7e-10
XM_028891388.2	2952	Nadk	NAD kinase (Nadk), transcript variant X2, mRNA	116.13	1.87	9e-10
XM_037197150.1	1638	Lmnb1	lamin B1 (Lmnb1), mRNA	91.46	1.81	9.1e-10
XR_005089713.1	3053	LOC119086426	uncharacterized LOC119086426 (LOC119086426), transcript variant X1, ncRNA	8.9	2.71	9.3e-10
XM_028859794.1	2601	Vmn2r110	vomeronasal type-2 receptor 116-like (LOC114685183), mRNA	0.49	6.92	9.5e-10
XM_028884283.2	3085	Fads2	fatty acid desaturase 2 (Fads2), mRNA	10.88	4.53	9.8e-10
XM_028854589.2	2932	Ccdc154	coiled-coil domain containing 154 (Ccdc154), transcript variant X7, mRNA	4.34	2.97	9.8e-10
XM_028889719.2	1380	Ubald2	UBA like domain containing 2 (Ubald2), mRNA	55.97	1.6	1e-09
XM_028860656.2	4471	Hip1	huntingtin interacting protein 1 (Hip1), mRNA	20.91	2.23	1e-09
XM_028881874.2	1614	Cxcl5	C-X-C motif chemokine 5 (LOC114701716), mRNA	3.7	5.22	1e-09
XM_037201313.1	3509	Septin9	septin 9 (Septin9), transcript variant X1, mRNA	1.09	10.47	1e-09
XM_037199931.1	1218	Trem4	triggering receptor expressed on myeloid cells 1-like (LOC114705361), transcript variant X3, mRNA	20.81	3.56	1.1e-09
XM_028890480.2	3116	Ano10	anoctamin 10 (Ano10), mRNA	13.24	1.71	1.1e-09
XM_037210272.1	2045	Slc11a1	solute carrier family 11 member 1 (Slc11a1), transcript variant X3, mRNA	10.74	3.38	1.1e-09
XM_028877801.2	3226	Gramd1a	GRAM domain containing 1A (Gramd1a), transcript variant X6, mRNA	12.68	2.15	1.3e-09
XM_028875566.2	1236	Selenop	selenoprotein P (LOC114697326), mRNA	94.68	-1.87	1.4e-09
XM_028880416.2	1629	Usp18	ubiquitin specific peptidase 18 (Usp18), mRNA	38.59	2.36	1.4e-09
XM_028895327.2	2426	Parp3	poly(ADP-ribose) polymerase family member 3 (Parp3), transcript variant X1, mRNA	20.62	2.18	1.4e-09
XM_028866282.2	4047	Gramd1b	GRAM domain containing 1B (Gramd1b), transcript variant X5, mRNA	3.49	3.43	1.4e-09
XM_028859044.2	1557	Clec5a	C-type lectin domain containing 5A (Clec5a), transcript variant X2, mRNA	66.25	2.43	1.5e-09
XM_028856577.2	1169	Tifa	TRAF interacting protein with forkhead associated domain (Tifa), transcript variant X1, mRNA	38.39	1.77	1.6e-09
XM_037204729.1	1984	Il1rn	interleukin 1 receptor antagonist (Il1rn), transcript variant X2, mRNA	1.11	6.29	1.6e-09
XM_028886095.2	2748	Stom	stomatin (Stom), mRNA	143.06	2.04	1.7e-09
XM_028890548.2	779	Ccl4	C-C motif chemokine 4-like (LOC114707727), mRNA	13.94	3.7	1.9e-09
XM_028874704.2	3156	Nfkb2	nuclear factor kappa B subunit 2 (Nfkb2), transcript variant X2, mRNA	9.06	1.86	1.9e-09
XM_037210920.1	3330	Macc1	MET transcriptional regulator MACC1 (Macc1), mRNA	1.37	4.35	2e-09
XM_028893355.2	1937	Dusp1	dual specificity phosphatase 1 (Dusp1), mRNA	119.07	2.37	2.1e-09
XM_028860900.2	1748	Gyg1	glycogenin 1 (Gyg1), transcript variant X2, mRNA	39.6	1.71	2.1e-09
XM_028869157.2	6371	Plxnb2	plexin B2 (Plxnb2), transcript variant X2, mRNA	10.42	-2.1	2.1e-09
XM_028879416.2	4432	Csf1	colony stimulating factor 1 (Csf1), transcript variant X1, mRNA	4.62	2.2	2.1e-09
XM_028881038.2	6344	Palld	palladin, cytoskeletal associated protein (Palld), transcript variant X2, mRNA	2.65	4.81	2.1e-09
XM_028872350.2	3104	Mtus1	microtubule associated scaffold protein 1 (Mtus1), transcript variant X6, mRNA	10.75	4.49	2.2e-09
XM_028891828.2	4630	Nod2	nucleotide binding oligomerization domain containing 2 (Nod2), mRNA	6.21	2.1	2.2e-09
XM_028867566.2	9030	Itpr1	inositol 1,4,5-trisphosphate receptor type 1 (Itpr1), transcript variant X1, mRNA	4.74	-1.65	2.2e-09
XM_028892193.2	3884	Mmp14	matrix metallopeptidase 14 (Mmp14), mRNA	3.84	4.7	2.2e-09
XM_037210459.1	2718	LOC119088933	uncharacterized LOC119088933 (LOC119088933), mRNA	0.47	6.79	2.2e-09
XM_037201934.1	464	Cd53	leukocyte surface antigen CD53-like (LOC119087237), partial mRNA	147.85	1.59	2.3e-09
XM_028859890.2	2193	Tgfb1	transforming growth factor beta 1 (Tgfb1), mRNA	121.27	1.69	2.3e-09
XM_028868385.2	3404	Mafb	MAF bZIP transcription factor B (Mafb), mRNA	17.3	2.79	2.3e-09
XM_028859043.2	1635	Clec5a	C-type lectin domain containing 5A (Clec5a), transcript variant X1, mRNA	42.36	2.49	2.4e-09
XM_028864332.2	3122	Atf6	activating transcription factor 6 (Atf6), transcript variant X1, mRNA	40.73	2.08	2.4e-09
XM_028883764.2	3292	Tnfaip2	TNF alpha induced protein 2 (Tnfaip2), transcript variant X2, mRNA	19.11	2.64	2.6e-09
XM_037201814.1	616	Timd2	T-cell immunoglobulin and mucin domain-containing protein 2-like (LOC114689091), partial mRNA	2230.02	3.55	2.8e-09
XM_028861273.2	2614	Stx11	syntaxin 11 (Stx11), transcript variant X1, mRNA	47.49	1.85	2.8e-09
XM_028868566.2	2148	B4galt5	beta-1,4-galactosyltransferase 5 (B4galt5), transcript variant X1, mRNA	30.45	2.3	2.9e-09
XM_028854997.2	4438	Tbc1d9b	TBC1 domain family member 9B (Tbc1d9b), transcript variant X2, mRNA	15.35	1.81	2.9e-09
XM_028874776.2	2499	Samsn1	SAM domain, SH3 domain and nuclear localization signals 1 (Samsn1), transcript variant X2, mRNA	2.74	3.49	3.1e-09
XM_028865281.2	5488	Kcnj2	potassium inwardly rectifying channel subfamily J member 2 (Kcnj2), mRNA	13.7	1.95	3.2e-09
XM_028878604.1	5714	Rnf24	ring finger protein 24 (Rnf24), mRNA	7.95	1.66	3.2e-09
XM_037200302.1	6631	Adgrg6	adhesion G protein-coupled receptor G6 (Adgrg6), transcript variant X2, mRNA	5.82	2.49	3.3e-09
XM_028854719.2	2145	Cx3cr1	C-X3-C motif chemokine receptor 1 (Cx3cr1), transcript variant X1, mRNA	20.43	-2.64	3.4e-09
XM_028893102.2	2723	Cxcr2	C-X-C chemokine receptor type 2 (LOC114709324), transcript variant X1, mRNA	185.11	2.36	3.5e-09
XM_028876569.2	2716	Ppp1r15b	protein phosphatase 1 regulatory subunit 15B (Ppp1r15b), mRNA	28.7	1.85	3.5e-09
XR_005090189.1	843	LOC119086826	uncharacterized LOC119086826 (LOC119086826), ncRNA	7.56	3.75	3.6e-09
XM_028861099.2	6880	Stxbp5	syntaxin binding protein 5 (Stxbp5), transcript variant X3, mRNA	27.86	1.96	3.7e-09
XM_028890387.2	2957	Orc1	origin recognition complex subunit 1 (Orc1), transcript variant X1, mRNA	2.39	3.72	3.8e-09
XM_028878860.2	1455	Spi1	Spi-1 proto-oncogene (Spi1), transcript variant X2, mRNA	186.25	1.93	4e-09
XM_028866291.2	6955	Gramd1b	GRAM domain containing 1B (Gramd1b), transcript variant X15, mRNA	8.42	2.41	4e-09
XM_028885566.2	2210	Sephs2	selenophosphate synthetase 2 (Sephs2), mRNA	36.66	1.75	4.1e-09
XM_037211159.1	3997	Hlx	H2.0 like homeobox (Hlx), transcript variant X2, mRNA	3.06	3.34	4.2e-09
XM_028861280.2	615	Cstb	cystatin B (Cstb), mRNA	189.64	2.1	4.3e-09
XM_028890855.2	585	S100a9	S100 calcium binding protein A9 (S100a9), mRNA	19119.1	2.67	4.5e-09
XM_028854175.2	2298	Septin5	septin 5 (Septin5), transcript variant X1, mRNA	6.48	2.7	4.5e-09
XM_028863792.2	3736	Nfil3	nuclear factor, interleukin 3 regulated (Nfil3), transcript variant X3, mRNA	1.94	3.56	4.5e-09
XM_028856909.1	1713	Hadh	hydroxyacyl-CoA dehydrogenase (Hadh), mRNA	17.38	-1.85	4.7e-09
XM_037202068.1	2885	Gramd1a	GRAM domain containing 1A (Gramd1a), transcript variant X3, mRNA	5.44	3.23	4.7e-09
XM_037199930.1	1309	Trem4	triggering receptor expressed on myeloid cells 1-like (LOC114705361), transcript variant X2, mRNA	31.95	2.54	4.8e-09
XM_028877107.2	1588	Ifngr2	interferon gamma receptor 2 (Ifngr2), transcript variant X2, mRNA	52.97	1.7	5e-09
XM_037200864.1	1044	Prss29	serine protease 29-like (LOC114681259), transcript variant X2, mRNA	13.85	3.65	5e-09
XM_028884223.2	1034	Mrpl16	mitochondrial ribosomal protein L16 (Mrpl16), mRNA	34.92	1.76	5.2e-09
XM_037200073.1	1285	Siglece	sialic acid-binding Ig-like lectin 12 (LOC114683921), transcript variant X2, mRNA	5.83	3.89	5.2e-09
XM_037211434.1	2954	Ikbke	inhibitor of nuclear factor kappa B kinase subunit epsilon (Ikbke), transcript variant X2, mRNA	10.71	3.31	6e-09
XM_028861027.2	1602	H2-Mb1	class II histocompatibility antigen, M beta 1 chain (LOC114686362), mRNA	71.19	-1.75	6.2e-09
XM_028891611.2	10720	Fbn2	fibrillin 2 (Fbn2), mRNA	1.09	5.83	6.3e-09
XM_037201211.1	864	Hs3st6	heparan sulfate-glucosamine 3-sulfotransferase 6 (Hs3st6), transcript variant X3, mRNA	6.28	3.63	6.8e-09
XM_028862398.2	3401	Steap4	STEAP4 metalloreductase (Steap4), transcript variant X1, mRNA	44.67	2.55	6.9e-09
XM_028877669.2	4215	Trib2	tribbles pseudokinase 2 (Trib2), transcript variant X1, mRNA	18.87	-1.58	6.9e-09
XM_037199499.1	1390	H2-Eb1	H-2 class II histocompatibility antigen, I-E beta chain (LOC114705818), transcript variant X2, mRNA	8.76	-11.3	6.9e-09
XM_037198413.1	1921	Fcer2	Fc fragment of IgE receptor II (Fcer2), mRNA	38.74	-2.07	7e-09
XM_028867209.2	2154	B3galnt1	beta-1,3-N-acetylgalactosaminyltransferase 1 (globoside blood group) (B3galnt1), transcript variant X1, mRNA	7.39	3.47	7.2e-09
XM_028879129.2	4338	Ptgfr	prostaglandin F receptor (Ptgfr), mRNA	1.13	-3.83	7.2e-09
XM_028875592.2	4517	Dab2	DAB adaptor protein 2 (Dab2), transcript variant X1, mRNA	9.08	3.74	7.3e-09
XM_028857920.2	4069	Gk	glycerol kinase (Gk), transcript variant X4, mRNA	7.1	2.13	7.4e-09
XM_028867580.2	2950	Bhlhe40	basic helix-loop-helix family member e40 (Bhlhe40), mRNA	27.83	1.64	7.7e-09
XM_037206656.1	2262	B3galnt1	beta-1,3-N-acetylgalactosaminyltransferase 1 (globoside blood group) (B3galnt1), transcript variant X4, mRNA	2.98	5.12	7.7e-09
XM_028892526.2	1325	Gramd2a	GRAM domain containing 2A (Gramd2a), transcript variant X1, mRNA	0.84	6.74	8.1e-09
XM_028877115.2	2216	Olig1	oligodendrocyte transcription factor 1 (Olig1), mRNA	33.59	2.11	8.3e-09
XM_028864499.2	2270	Sele	selectin E (Sele), mRNA	0.68	5.16	8.3e-09
XM_028887969.2	489	Lst1	leukocyte specific transcript 1 (Lst1), transcript variant X1, mRNA	293.59	1.95	8.4e-09
XM_028893723.2	2821	Lamp2	lysosomal associated membrane protein 2 (Lamp2), mRNA	41.62	1.76	8.4e-09
XM_028873048.2	6994	Osbpl8	oxysterol binding protein like 8 (Osbpl8), transcript variant X4, mRNA	27.44	1.8	8.4e-09
XM_028857430.2	3235	Slc39a8	solute carrier family 39 member 8 (Slc39a8), transcript variant X1, mRNA	7.17	1.98	8.4e-09
XM_028893916.2	3231	Cd177	CD177 antigen (LOC114709914), mRNA	1.82	4.53	8.4e-09
XM_028885699.2	6239	Megf9	multiple EGF like domains 9 (Megf9), mRNA	27.91	2.51	9.4e-09
XM_028890257.2	2255	Sesn1	sestrin 1 (Sesn1), transcript variant X2, mRNA	23.18	-1.6	1e-08
XM_028892854.2	4620	Ttc7a	tetratricopeptide repeat domain 7A (Ttc7a), transcript variant X1, mRNA	18.46	-1.54	1e-08
XM_028871496.2	2044	Ces1e	carboxylesterase 1E-like (LOC114694526), mRNA	6.5	2.59	1e-08
XM_028871652.2	3731	Scamp1	secretory carrier membrane protein 1 (Scamp1), transcript variant X1, mRNA	5.74	2.12	1e-08
XM_028870218.2	1337	Ncf1	neutrophil cytosolic factor 1 (Ncf1), mRNA	206.69	1.9	1.1e-08
XM_028861028.2	1434	H2-Ma	class II histocompatibility antigen, M alpha chain (LOC114686363), transcript variant X1, mRNA	79.81	-1.74	1.1e-08
XM_037210252.1	1491	Tuba4a	tubulin alpha 4a (Tuba4a), mRNA	75.12	1.56	1.1e-08
XM_028894975.2	1652	Prss23	serine protease 23 (Prss23), transcript variant X3, mRNA	15.09	5.44	1.1e-08
XM_028882653.2	4297	Map3k14	mitogen-activated protein kinase kinase kinase 14 (Map3k14), transcript variant X2, mRNA	10.15	-1.56	1.1e-08
XM_037201988.1	2249	Nlrp1a	NACHT, LRR and PYD domains-containing protein 1a-like (LOC114706337), partial mRNA	70.44	1.64	1.2e-08
XM_028872450.2	1289	Cdkn2d	cyclin dependent kinase inhibitor 2D (Cdkn2d), transcript variant X1, mRNA	55.11	1.64	1.2e-08
XM_028862633.2	802	Clec4a4	C-type lectin domain family 4 member A-like (LOC114688010), partial mRNA	30.14	2.5	1.2e-08
XM_028856801.2	4661	Stat3	signal transducer and activator of transcription 3 (Stat3), transcript variant X3, mRNA	11.1	1.67	1.2e-08
XM_028871399.2	776	Reg3g	regenerating islet-derived protein 3-gamma-like (LOC114694456), mRNA	1.65	6.17	1.2e-08
XM_028855596.2	2072	Samhd1	SAM and HD domain containing deoxynucleoside triphosphate triphosphohydrolase 1 (Samhd1), mRNA	335.78	1.92	1.3e-08
XM_028871463.2	2289	Cpne2	copine 2 (Cpne2), mRNA	36.42	1.89	1.3e-08
XM_028855940.2	2392	Pola2	DNA polymerase alpha 2, accessory subunit (Pola2), mRNA	14.51	1.83	1.3e-08
XM_028882781.2	4883	Tbc1d2	TBC1 domain family member 2 (Tbc1d2), transcript variant X2, mRNA	12.43	2.53	1.3e-08
XM_028890540.2	735	Ccl4	C-C motif chemokine 4-like (LOC114707719), mRNA	7.48	5.45	1.3e-08
XM_028884625.2	1406	Rgs1	regulator of G protein signaling 1 (Rgs1), mRNA	5.9	3	1.3e-08
XM_028862647.2	3070	Parp9	poly(ADP-ribose) polymerase family member 9 (Parp9), transcript variant X1, mRNA	29.03	1.63	1.4e-08
XR_005090092.1	526	LOC119086747	uncharacterized LOC119086747 (LOC119086747), ncRNA	20.54	2.55	1.4e-08
XM_037201333.1	2564	Dhx58	DExH-box helicase 58 (Dhx58), transcript variant X1, mRNA	19.14	2.04	1.4e-08
XM_028875906.2	7048	Cask	calcium/calmodulin dependent serine protein kinase (Cask), transcript variant X6, mRNA	3.56	3.13	1.4e-08
XM_028870950.2	1920	Dgat1	diacylglycerol O-acyltransferase 1 (Dgat1), mRNA	29.04	1.71	1.6e-08
XM_028892933.2	2162	Cd38	CD38 molecule (Cd38), mRNA	56.68	1.57	1.7e-08
XM_037201743.1	3798	Cd163	scavenger receptor cysteine-rich type 1 protein M130-like (LOC114688009), mRNA	83.68	4.25	1.8e-08
XM_028857418.1	3627	Nfkb1	nuclear factor kappa B subunit 1 (Nfkb1), mRNA	75.02	1.69	1.8e-08
XM_037210275.1	2422	Cxcr2	C-X-C chemokine receptor type 2 (LOC114709324), transcript variant X3, mRNA	61.55	2.75	1.9e-08
XM_028887447.2	3919	Pofut1	protein O-fucosyltransferase 1 (Pofut1), mRNA	67.19	1.78	2e-08
XM_028867672.2	4622	Rnf144b	ring finger protein 144B (Rnf144b), transcript variant X1, mRNA	23.23	2.04	2e-08
XM_037210698.1	3582	Numb	NUMB endocytic adaptor protein (Numb), transcript variant X2, mRNA	10.36	1.71	2e-08
XM_028890427.2	3175	Abhd5	abhydrolase domain containing 5, lysophosphatidic acid acyltransferase (Abhd5), transcript variant X1, mRNA	14.14	1.63	2.1e-08
XM_028886267.2	2321	B4galnt1	beta-1,4-N-acetyl-galactosaminyltransferase 1 (B4galnt1), transcript variant X1, mRNA	61.24	1.81	2.2e-08
XM_028895057.2	7963	Hspa4l	heat shock protein family A (Hsp70) member 4 like (Hspa4l), mRNA	7.98	1.51	2.2e-08
XM_028881865.2	4481	Rin2	Ras and Rab interactor 2 (Rin2), transcript variant X2, mRNA	14.81	1.82	2.7e-08
XM_028873448.2	6296	Ltbp1	latent transforming growth factor beta binding protein 1 (Ltbp1), mRNA	13.74	4.52	2.7e-08
XM_028878198.2	6574	Zc3h13	zinc finger CCCH-type containing 13 (Zc3h13), transcript variant X2, mRNA	11.2	2.35	2.7e-08
XM_037203026.1	2475	Fgr	FGR proto-oncogene, Src family tyrosine kinase (Fgr), transcript variant X1, mRNA	263.83	1.87	2.9e-08
XM_028855580.1	5016	Frmd4b	FERM domain containing 4B (Frmd4b), transcript variant X8, mRNA	0.7	-9.46	2.9e-08
XM_037197465.1	3945	Cerk	ceramide kinase (Cerk), transcript variant X4, mRNA	30.37	-1.69	3.1e-08
XM_028859249.2	1367	Nfkbib	NFKB inhibitor beta (Nfkbib), mRNA	23.9	1.58	3.3e-08
XM_028887537.1	2557	Bcl2l1	BCL2 like 1 (Bcl2l1), transcript variant X6, mRNA	17.45	1.94	3.3e-08
XM_028857441.2	2659	Tuft1	tuftelin 1 (Tuft1), mRNA	1.44	3.78	3.3e-08
XM_028859104.2	2140	Ifit1	interferon-induced protein with tetratricopeptide repeats 1-like (LOC114684570), mRNA	6.38	2.8	3.4e-08
XM_028879380.2	6665	Sort1	sortilin 1 (Sort1), transcript variant X2, mRNA	3.34	2.34	3.4e-08
XM_037205107.1	2563	Fsip1	fibrous sheath interacting protein 1 (Fsip1), transcript variant X1, mRNA	1.01	-9.08	3.4e-08
XM_028857288.2	3318	Ppp1r3d	protein phosphatase 1 regulatory subunit 3D (Ppp1r3d), mRNA	18.49	2.11	3.7e-08
XM_028867499.2	6267	Zbtb11	zinc finger and BTB domain containing 11 (Zbtb11), transcript variant X2, mRNA	6.6	1.87	3.7e-08
XM_028881866.2	4669	Rin2	Ras and Rab interactor 2 (Rin2), transcript variant X4, mRNA	4.98	2.1	3.7e-08
XM_028880842.2	785	Cyba	cytochrome b-245 light chain (LOC114700968), mRNA	428.48	1.77	3.8e-08
XM_028873441.2	3503	Picalm	phosphatidylinositol binding clathrin assembly protein (Picalm), transcript variant X19, mRNA	59.79	1.85	3.8e-08
XM_028858310.2	3063	Cd33	myeloid cell surface antigen CD33-like (LOC114683936), transcript variant X2, mRNA	11.77	2.05	3.8e-08
XM_028874727.1	3822	Ptgs2	prostaglandin-endoperoxide synthase 2 (Ptgs2), mRNA	30.47	3.31	3.9e-08
XM_028861279.2	6609	Pdxk	pyridoxal kinase (Pdxk), mRNA	15.78	1.57	3.9e-08
XM_028876473.2	3189	Jdp2	Jun dimerization protein 2 (Jdp2), transcript variant X1, mRNA	13.14	1.82	4.1e-08
XM_037200377.1	10080	Lama2	laminin subunit alpha 2 (Lama2), transcript variant X2, mRNA	0.22	9.69	4.1e-08
XM_037211239.1	1152	Itln1	intelectin-1a-like (LOC114690754), transcript variant X2, mRNA	1.97	7.49	4.2e-08
XM_028864333.2	3121	Atf6	activating transcription factor 6 (Atf6), transcript variant X2, mRNA	5.16	2.64	4.4e-08
XM_037206397.1	2166	Mfsd13a	major facilitator superfamily domain containing 13A (Mfsd13a), transcript variant X3, mRNA	1.72	5.97	4.5e-08
XM_028859848.2	1128	Cd53	CD53 molecule (Cd53), mRNA	130.66	1.57	4.8e-08
XM_028874782.2	4763	Usp25	ubiquitin specific peptidase 25 (Usp25), transcript variant X4, mRNA	34.44	1.55	4.8e-08
XM_028872366.2	4383	Msr1	macrophage scavenger receptor 1 (Msr1), transcript variant X1, mRNA	2.18	3.34	4.9e-08
XM_028876606.2	1823	Chit1	chitinase 1 (Chit1), mRNA	71.71	1.71	5e-08
XM_037201697.1	5100	C3	complement C3 (C3), transcript variant X2, mRNA	12.45	3.61	5e-08
XM_028891936.2	1672	Rnd1	Rho family GTPase 1 (Rnd1), mRNA	2.68	4.24	5.2e-08
XM_037202924.1	3359	Csf3r	colony stimulating factor 3 receptor (Csf3r), transcript variant X2, mRNA	145.9	2.27	5.3e-08
XM_037202189.1	3234	Lilrb3	leukocyte immunoglobulin-like receptor subfamily B member 3 (LOC114689116), mRNA	13.44	-1.9	5.3e-08
XM_028891603.2	1645	Serpinb10	serpin family B member 10 (Serpinb10), transcript variant X1, mRNA	155.88	1.74	5.4e-08
XM_028871371.2	4770	Hk2	hexokinase 2 (Hk2), transcript variant X1, mRNA	12.71	1.82	5.6e-08
XM_028871492.2	1919	Ces1g	liver carboxylesterase 1-like (LOC114694522), transcript variant X2, mRNA	9.47	2.44	5.6e-08
XM_028885694.2	267	Mt2	metallothionein-2-like (LOC114704434), mRNA	5.27	8.23	5.6e-08
XM_028864325.2	3160	Fcgr2b	Fc fragment of IgG receptor IIb (Fcgr2b), transcript variant X4, mRNA	0.72	9.97	5.9e-08
XM_028872897.2	1542	Litaf	lipopolysaccharide induced TNF factor (Litaf), transcript variant X2, mRNA	93.5	1.78	6e-08
XM_037205840.1	1278	Serpinb1	serpin family B member 1 (Serpinb1), transcript variant X2, mRNA	50.89	3.44	6.1e-08
XM_028858307.2	2610	Siglecg	sialic acid-binding Ig-like lectin 10 (LOC114683935), transcript variant X1, mRNA	17.79	1.58	6.1e-08
XM_028893385.1	3311	Slc20a1	solute carrier family 20 member 1 (Slc20a1), transcript variant X1, mRNA	11.86	2.08	6.1e-08
XM_028892549.2	13558	Dnah17	dynein axonemal heavy chain 17 (Dnah17), mRNA	0.54	2.8	6.1e-08
XM_028885448.2	3226	Csf3r	colony stimulating factor 3 receptor (Csf3r), transcript variant X4, mRNA	243.68	2.26	6.3e-08
XM_028867469.2	1360	Cd47	CD47 molecule (Cd47), transcript variant X2, mRNA	77.25	1.44	6.3e-08
XM_028878041.2	3754	Flt3	fms related receptor tyrosine kinase 3 (Flt3), transcript variant X1, mRNA	5.48	-2.97	6.4e-08
XM_028891332.2	2603	Cd36	CD36 molecule (Cd36), transcript variant X6, mRNA	0.76	9.54	6.4e-08
XM_028888433.2	6996	Anks1a	ankyrin repeat and sterile alpha motif domain containing 1A (Anks1a), transcript variant X4, mRNA	0.46	-7.78	6.9e-08
XM_028870782.2	3862	Mxd4	MAX dimerization protein 4 (Mxd4), transcript variant X1, mRNA	23.27	-1.39	7.4e-08
XM_028860921.2	2671	Tec	tec protein tyrosine kinase (Tec), transcript variant X1, mRNA	18.14	1.48	7.4e-08
XM_037209618.1	2880	Erg	ETS transcription factor ERG (Erg), transcript variant X2, mRNA	2.82	2.92	7.5e-08
XM_028875594.2	3862	Dab2	DAB adaptor protein 2 (Dab2), transcript variant X3, mRNA	4.08	4.19	7.9e-08
XM_037207918.1	4768	Mst1r	macrophage stimulating 1 receptor (Mst1r), transcript variant X2, mRNA	0.35	5.34	8e-08
XM_028881294.2	4792	Atp11a	ATPase phospholipid transporting 11A (Atp11a), transcript variant X7, mRNA	7.36	2.11	8.1e-08
XM_028871097.2	1811	Mfng	MFNG O-fucosylpeptide 3-beta-N-acetylglucosaminyltransferase (Mfng), transcript variant X1, mRNA	11.96	-2.26	8.3e-08
XM_028867816.2	5583	Dcun1d3	defective in cullin neddylation 1 domain containing 3 (Dcun1d3), transcript variant X1, mRNA	4.47	1.68	8.6e-08
XM_028888842.2	2431	Osbpl9	oxysterol binding protein like 9 (Osbpl9), transcript variant X6, mRNA	1.5	-9.56	8.6e-08
XM_028874408.2	1727	Nfe2	nuclear factor, erythroid 2 (Nfe2), transcript variant X2, mRNA	84.61	1.94	8.7e-08
XM_028862473.2	3612	Steap2	STEAP2 metalloreductase (Steap2), transcript variant X2, mRNA	0.73	9.96	8.9e-08
XM_028881838.2	6727	Cd93	CD93 molecule (Cd93), mRNA	11.12	-2.06	9.4e-08
XM_037204582.1	2613	Best1	bestrophin-1-like (LOC114685691), mRNA	1.22	3.45	9.6e-08
XM_028865792.2	4885	Il1r1	interleukin 1 receptor type 1 (Il1r1), transcript variant X4, mRNA	4.95	3.7	9.7e-08
XM_037208848.1	6368	LOC114689465	murine leukemia virus integrase; uncharacterized LOC114689465 (LOC114689465), mRNA	68.57	1.91	1e-07
XM_037197640.1	4869	Csf2rb	colony stimulating factor 2 receptor subunit beta (Csf2rb), transcript variant X6, mRNA	16	3.65	1e-07
XM_037201745.1	1341	Llrp1a	NACHT, LRR and PYD domains-containing protein 1a-like (LOC114688014), mRNA	87.7	1.43	1.1e-07
XM_028857340.2	5930	Arhgef18	Rho/Rac guanine nucleotide exchange factor 18 (Arhgef18), transcript variant X1, mRNA	52.97	-1.78	1.1e-07
XM_037201213.1	962	LOC114686457	protein RoBo-1-like (LOC114686457), transcript variant X2, mRNA	25.09	3.82	1.1e-07
XM_028861561.2	1879	Trim30a	tripartite motif-containing protein 30A (LOC114686891), transcript variant X2, mRNA	19.57	1.48	1.1e-07
XM_028870513.2	7295	St8sia6	ST8 alpha-N-acetyl-neuraminide alpha-2,8-sialyltransferase 6 (St8sia6), mRNA	2.89	-2.36	1.1e-07
XM_028866853.1	2649	Flot2	flotillin 2 (Flot2), transcript variant X1, mRNA	55.73	1.81	1.2e-07
XM_028889222.2	3392	Tgm2	transglutaminase 2 (Tgm2), mRNA	33.84	3.29	1.2e-07
XM_028881360.2	3299	Tfe3	transcription factor binding to IGHM enhancer 3 (Tfe3), transcript variant X1, mRNA	15.64	1.58	1.2e-07
XM_037198605.1	5387	Sgsm1	small G protein signaling modulator 1 (Sgsm1), mRNA	2.83	-2.29	1.2e-07
XM_028875002.2	9064	Pcdh19	protocadherin 19 (Pcdh19), transcript variant X4, mRNA	0.21	9.47	1.2e-07
XM_028861947.2	548	S100a11	S100 calcium binding protein A11 (S100a11), mRNA	694	1.76	1.3e-07
XM_037197954.1	2387	Pram1	PML-RARA regulated adaptor molecule 1 (Pram1), transcript variant X4, mRNA	29.34	2.89	1.3e-07
XM_037202081.1	2774	Gramd1a	GRAM domain containing 1A (Gramd1a), transcript variant X7, mRNA	10.99	2.2	1.3e-07
XM_028869700.1	2634	Egln3	egl-9 family hypoxia inducible factor 3 (Egln3), mRNA	5.96	2.14	1.3e-07
XM_037197638.1	4832	Csf2rb	colony stimulating factor 2 receptor subunit beta (Csf2rb), transcript variant X4, mRNA	4.27	3.32	1.3e-07
XM_028862990.2	1552	Serpina3n	serine protease inhibitor A3N-like (LOC114688399), mRNA	12.67	1.96	1.4e-07
XM_037202923.1	3229	Csf3r	colony stimulating factor 3 receptor (Csf3r), transcript variant X1, mRNA	137.03	2.41	1.5e-07
XM_028874065.2	3558	Emilin2	elastin microfibril interfacer 2 (Emilin2), mRNA	55.41	2.04	1.5e-07
XM_028862987.2	2088	Serpina3f	serine protease inhibitor A3F-like (LOC114688398), transcript variant X2, mRNA	13.58	2.74	1.5e-07
XM_028858589.2	5179	Arid3a	AT-rich interaction domain 3A (Arid3a), transcript variant X2, mRNA	11.35	1.69	1.5e-07
XM_028866042.2	3062	Pxylp1	2-phosphoxylose phosphatase 1 (Pxylp1), transcript variant X4, mRNA	2.14	5.68	1.7e-07
XM_028867754.2	1745	Edn1	endothelin 1 (Edn1), mRNA	0.94	4.75	1.7e-07
XM_028877106.2	1590	Ifngr2	interferon gamma receptor 2 (Ifngr2), transcript variant X1, mRNA	130.52	1.6	1.8e-07
XM_037196827.1	1902	Nr1h4	nuclear receptor subfamily 1 group H member 4 (Nr1h4), transcript variant X2, mRNA	1.27	10.11	1.8e-07
XM_037208430.1	2940	Adamdec1	disintegrin and metalloproteinase domain-containing protein 28 (LOC114702671), transcript variant X6, mRNA	127.89	-2.41	1.9e-07
XM_028877563.2	3231	Arap1	ArfGAP with RhoGAP domain, ankyrin repeat and PH domain 1 (Arap1), transcript variant X10, mRNA	27.61	1.68	1.9e-07
XM_037201984.1	3219	Rasgrp1	RAS guanyl-releasing protein 1 (LOC114705910), partial mRNA	16.86	-1.56	1.9e-07
XM_028864899.1	1236	Pih1d2	PIH1 domain containing 2 (Pih1d2), transcript variant X1, mRNA	11.05	2.13	1.9e-07
XM_037209605.1	2944	Itgb2l	integrin beta-2-like protein (LOC114700344), transcript variant X2, mRNA	9.02	3.08	1.9e-07
XM_037208138.1	2929	Limk2	LIM domain kinase 2 (Limk2), transcript variant X4, mRNA	6.67	3.03	1.9e-07
XR_005091992.1	899	C7H19orf38	chromosome 7 C19orf38 homolog (C7H19orf38), transcript variant X4, misc_RNA	34.4	1.95	2e-07
XM_028892835.1	4383	Pacs1	phosphofurin acidic cluster sorting protein 1 (Pacs1), mRNA	31.41	-1.41	2e-07
XM_028870802.2	3017	Sh3bp2	SH3 domain binding protein 2 (Sh3bp2), transcript variant X2, mRNA	15.32	1.96	2e-07
XM_028868848.2	1744	Agpat2	1-acylglycerol-3-phosphate O-acyltransferase 2 (Agpat2), transcript variant X1, mRNA	14.21	1.83	2e-07
XM_028873728.2	4902	Anpep	alanyl aminopeptidase, membrane (LOC114696172), mRNA	12.23	2.55	2e-07
XM_028869441.2	6628	Kdm6b	lysine demethylase 6B (Kdm6b), transcript variant X8, mRNA	5.73	2.37	2e-07
XM_028873674.2	4867	Xdh	xanthine dehydrogenase (Xdh), mRNA	96.66	1.92	2.1e-07
XM_028871746.2	2101	Acy3	aminoacylase 3 (Acy3), mRNA	9.48	-1.86	2.1e-07
XM_028891008.2	1480	Upp1	uridine phosphorylase 1 (Upp1), transcript variant X1, mRNA	123.41	2.33	2.2e-07
XM_028868424.2	1474	Ada	adenosine deaminase (Ada), transcript variant X1, mRNA	28.3	1.63	2.2e-07
XM_028876449.2	4625	Tcaf2	TRPM8 channel-associated factor 2-like (LOC114698011), mRNA	3.66	2.58	2.2e-07
XM_028892973.2	2526	Kcnk12	potassium two pore domain channel subfamily K member 12 (Kcnk12), mRNA	0.7	4.74	2.2e-07
XM_028873391.1	1971	Fez2	fasciculation and elongation protein zeta 2 (Fez2), transcript variant X2, mRNA	25.85	1.48	2.3e-07
XM_037200175.1	1240	H2-Ob	HLA class II histocompatibility antigen, DO beta chain (LOC114689125), transcript variant X1, mRNA	51.14	-1.93	2.4e-07
XM_028892101.2	1941	Irf9	interferon regulatory factor 9 (Irf9), transcript variant X2, mRNA	38.44	1.44	2.4e-07
XM_037210389.1	2052	Cflar	CASP8 and FADD like apoptosis regulator (Cflar), transcript variant X3, mRNA	5.43	2.79	2.4e-07
XM_028878861.2	1431	Spi1	Spi-1 proto-oncogene (Spi1), transcript variant X1, mRNA	31.67	1.67	2.5e-07
XM_028892796.2	2779	Rhoq	ras homolog family member Q (Rhoq), mRNA	24.29	1.6	2.6e-07
XM_037202636.1	6982	Palm2akap2	PALM2 and AKAP2 fusion (Palm2akap2), transcript variant X8, mRNA	5.42	2.12	2.7e-07
XM_037209186.1	1442	Anxa3	annexin A3 (Anxa3), transcript variant X3, mRNA	5.36	4.16	2.7e-07
XM_037207456.1	2225	Pkm	pyruvate kinase M1/2 (Pkm), transcript variant X3, mRNA	1.16	10.34	2.7e-07
XM_028890225.2	2153	Rgs17	regulator of G protein signaling 17 (Rgs17), transcript variant X2, mRNA	0.95	4.79	2.7e-07
XM_028873440.2	3527	Picalm	phosphatidylinositol binding clathrin assembly protein (Picalm), transcript variant X18, mRNA	10.36	4.85	2.9e-07
XM_028892659.2	778	Orm1	orosomucoid 1 (Orm1), mRNA	220.17	4.31	3e-07
XM_028860726.2	1994	Ifngr1	interferon gamma receptor 1 (LOC114686090), mRNA	97.49	1.7	3e-07
XM_028875302.2	858	Pla2g2a	phospholipase A2 group IIA (Pla2g2a), mRNA	29.14	2.74	3e-07
XM_028865843.2	4822	Il18rap	interleukin 18 receptor accessory protein (LOC114690863), transcript variant X2, mRNA	11.49	1.95	3.1e-07
XR_005090375.1	580	LOC119086961	uncharacterized LOC119086961 (LOC119086961), ncRNA	6.67	3.6	3.1e-07
XM_037206859.1	2750	Pglyrp4	peptidoglycan recognition protein 4-like (LOC114707960), mRNA	3.93	2.58	3.1e-07
XM_037197206.1	2223	Lipg	lipase G, endothelial type (Lipg), transcript variant X2, mRNA	3.61	4.63	3.1e-07
XM_028884949.2	1407	Timp1	TIMP metallopeptidase inhibitor 1 (Timp1), transcript variant X2, mRNA	1.89	5.3	3.1e-07
XM_028857437.2	3308	Slc39a8	solute carrier family 39 member 8 (Slc39a8), transcript variant X3, mRNA	1.13	3.49	3.1e-07
XM_028882398.2	4916	Wnt5a	Wnt family member 5A (Wnt5a), transcript variant X2, mRNA	0.79	3.56	3.1e-07
XM_037210422.1	2478	Nabp1	nucleic acid binding protein 1 (Nabp1), transcript variant X3, mRNA	6.91	1.77	3.2e-07
XM_028859831.2	3801	B3galnt2	beta-1,3-N-acetylgalactosaminyltransferase 2 (B3galnt2), mRNA	18.28	1.49	3.3e-07
XM_028870604.2	1812	Xbp1	X-box binding protein 1 (Xbp1), mRNA	57.31	1.37	3.4e-07
XM_028888427.2	1885	Cdkn1a	cyclin dependent kinase inhibitor 1A (Cdkn1a), mRNA	6	2.16	3.4e-07
XM_037202225.1	2093	Tarm1	immunoglobulin superfamily member 1-like (LOC119087310), mRNA	5.78	2.38	3.4e-07
XR_005092144.1	1642	LOC119088499	uncharacterized LOC119088499 (LOC119088499), ncRNA	0.98	4.11	3.4e-07
XM_028888804.2	3156	Erlin1	ER lipid raft associated 1 (Erlin1), transcript variant X2, mRNA	0.56	9.36	3.4e-07
XM_028855239.2	803	Tyrobp	transmembrane immune signaling adaptor TYROBP (LOC114681639), mRNA	420.25	1.68	3.5e-07
XM_028875051.2	4280	Add3	adducin 3 (Add3), transcript variant X1, mRNA	66.42	-1.52	3.6e-07
XM_028874665.2	2089	Calhm2	calcium homeostasis modulator family member 2 (Calhm2), mRNA	11.53	-1.97	3.6e-07
XM_037200761.1	2055	Trim16	tripartite motif containing 16 (Trim16), transcript variant X2, mRNA	8.78	3.49	3.6e-07
XM_028873253.2	4590	Map3k15	mitogen-activated protein kinase kinase kinase 15 (Map3k15), mRNA	3.44	2.41	3.6e-07
XM_028888312.2	10293	Unc79	unc-79 homolog, NALCN channel complex subunit (Unc79), mRNA	0.72	3.48	3.7e-07
XM_028875000.2	10263	Pcdh19	protocadherin 19 (Pcdh19), transcript variant X2, mRNA	0.23	5.67	3.7e-07
XM_028878709.1	1960	Pdia3	protein disulfide isomerase family A member 3 (Pdia3), mRNA	192.03	1.54	3.8e-07
XM_028869475.2	2832	Inpp5a	inositol polyphosphate-5-phosphatase A (Inpp5a), mRNA	17.88	1.59	3.9e-07
XM_028892424.2	3585	Ergic2	ERGIC and golgi 2 (Ergic2), transcript variant X1, mRNA	12.29	1.3	3.9e-07
XM_028882773.2	5768	Tgfbr1	transforming growth factor beta receptor 1 (Tgfbr1), transcript variant X1, mRNA	10.5	1.76	3.9e-07
XM_028884633.2	1195	Ptges	prostaglandin E synthase (Ptges), mRNA	0.73	6.54	4.2e-07
XM_028856101.2	1017	Rnase6	ribonuclease A family member k6 (Rnase6), transcript variant X1, mRNA	54.21	-1.6	4.6e-07
XM_037207696.1	4735	Ldlr	low density lipoprotein receptor (Ldlr), mRNA	28.91	1.69	4.6e-07
XM_028862143.2	4900	Cr2	complement C3d receptor 2 (Cr2), transcript variant X3, mRNA	11.95	-1.61	4.6e-07
XM_028856093.2	8578	Chd8	chromodomain helicase DNA binding protein 8 (Chd8), transcript variant X3, mRNA	0.31	-9.05	4.6e-07
XM_028858559.2	3771	Midn	midnolin (Midn), transcript variant X1, mRNA	20.48	1.74	4.9e-07
XM_037197826.1	4677	Sbno2	strawberry notch homolog 2 (Sbno2), transcript variant X3, mRNA	3.34	5.62	5e-07
XM_037202186.1	3207	Lilra6	leukocyte immunoglobulin-like receptor subfamily A member 6 (LOC114688828), transcript variant X4, mRNA	3.08	-3.49	5e-07
XM_028873054.2	6646	Osbpl8	oxysterol binding protein like 8 (Osbpl8), transcript variant X10, mRNA	9.57	1.91	5.3e-07
XM_028868842.2	1275	Cd302	CD302 antigen (LOC114692807), transcript variant X2, mRNA	36	1.78	5.5e-07
XM_037203195.1	3247	H6pd	hexose-6-phosphate dehydrogenase/glucose 1-dehydrogenase (H6pd), transcript variant X1, mRNA	4.65	5.47	5.5e-07
XM_028871553.2	506	Ccl22	C-C motif chemokine ligand 22 (Ccl22), mRNA	14.37	4.6	5.7e-07
XM_037204164.1	1294	Clec4a	C-type lectin domain family 4 member A-like (LOC114683493), mRNA	5.18	2.9	5.7e-07
XM_028882809.2	1576	Hsd11b1	hydroxysteroid 11-beta dehydrogenase 1 (Hsd11b1), mRNA	8.47	2.56	5.8e-07
XM_028876207.2	1990	Itm2c	integral membrane protein 2C (Itm2c), mRNA	30.21	-1.49	6e-07
XR_005093031.1	3331	Ikbke	inhibitor of nuclear factor kappa B kinase subunit epsilon (Ikbke), transcript variant X4, misc_RNA	3.59	1.93	6e-07
XM_028868262.2	2150	Gpr183	G protein-coupled receptor 183 (Gpr183), transcript variant X1, mRNA	33.75	-1.36	6.1e-07
XM_037205708.1	3120	Hk3	hexokinase 3 (Hk3), transcript variant X2, mRNA	9.44	3.36	6.1e-07
XM_037211440.1	2453	Fcmr	Fc fragment of IgM receptor (Fcmr), mRNA	137.52	-1.67	6.3e-07
XM_028883418.2	2337	Kctd12	BTB/POZ domain-containing protein KCTD12-like (LOC114702847), mRNA	14.46	2.1	6.5e-07
XM_028878586.2	4511	Atrn	attractin (Atrn), transcript variant X1, mRNA	9.67	1.82	6.5e-07
XM_028886358.2	2769	Umps	uridine monophosphate synthetase (Umps), mRNA	12.59	1.41	6.6e-07
XM_028854693.2	1948	Tmem204	transmembrane protein 204 (Tmem204), mRNA	6	-2.42	6.7e-07
XM_028868425.2	1471	Ada	adenosine deaminase (Ada), transcript variant X2, mRNA	32.43	1.53	6.8e-07
XM_028857815.2	3725	Slc2a3	solute carrier family 2 member 3 (Slc2a3), transcript variant X2, mRNA	2.5	6.98	6.8e-07
XM_037196657.1	3724	Itga7	integrin subunit alpha 7 (Itga7), transcript variant X11, mRNA	1.82	4.83	7.5e-07
XM_028883565.2	3601	Tlr8	toll like receptor 8 (Tlr8), mRNA	12.65	-1.41	7.8e-07
XM_028857834.2	1979	C3ar1	complement C3a receptor 1 (C3ar1), mRNA	8.26	2.2	8e-07
XM_028888863.2	2245	Osbpl9	oxysterol binding protein like 9 (Osbpl9), transcript variant X9, mRNA	44.03	1.59	8.1e-07
XM_037197975.1	4231	Furin	furin, paired basic amino acid cleaving enzyme (Furin), transcript variant X3, mRNA	38.51	1.44	8.2e-07
XM_037207584.1	2567	Tbcel	tubulin folding cofactor E like (Tbcel), transcript variant X6, mRNA	3.06	2.26	8.3e-07
XM_028866949.2	1910	Adap2	ArfGAP with dual PH domains 2 (Adap2), transcript variant X1, mRNA	11.15	2.38	8.4e-07
XM_028872253.2	627	Pde6h	phosphodiesterase 6H (Pde6h), transcript variant X1, mRNA	4.59	3.78	8.4e-07
XM_028854948.2	1680	Bbc3	BCL2 binding component 3 (Bbc3), transcript variant X2, mRNA	10.88	1.87	8.5e-07
XM_028873420.2	2205	Eed	embryonic ectoderm development (Eed), transcript variant X1, mRNA	15.25	1.41	8.6e-07
XM_028857369.2	2265	Ube2d3	ubiquitin conjugating enzyme E2 D3 (Ube2d3), transcript variant X2, mRNA	34.62	1.44	8.8e-07
XM_037200171.1	5061	Il1r1	interleukin 1 receptor type 1 (Il1r1), transcript variant X2, mRNA	0.98	5.06	8.8e-07
XM_028855388.2	2729	Gbp4	guanylate-binding protein 4-like (LOC114681718), mRNA	15.64	1.73	8.9e-07
XM_028890982.2	2012	Mmp10	matrix metallopeptidase 10 (Mmp10), mRNA	0.63	5.3	8.9e-07
XM_037198642.1	2678	Taok3	TAO kinase 3 (Taok3), transcript variant X5, mRNA	0.47	9.59	9e-07
XM_037202791.1	3046	Orc1	origin recognition complex subunit 1 (Orc1), transcript variant X2, mRNA	0.62	5.49	9.1e-07
XM_028884212.2	5043	Dtx4	deltex E3 ubiquitin ligase 4 (Dtx4), transcript variant X1, mRNA	14.05	-1.45	9.2e-07
XM_028876075.2	2052	Max	MYC associated factor X (Max), transcript variant X1, mRNA	24.49	1.7	9.6e-07
XM_028879063.2	3041	St3gal4	ST3 beta-galactoside alpha-2,3-sialyltransferase 4 (St3gal4), transcript variant X2, mRNA	2.92	2.81	9.6e-07
XM_028857084.2	1505	Adora2b	adenosine A2b receptor (Adora2b), mRNA	16.31	2.9	1.1e-06
XM_037200885.1	2204	Irgm1	immunity-related GTPase family M protein 1-like (LOC114706392), mRNA	10.13	1.75	1.1e-06
XM_037199903.1	6006	Aff3	AF4/FMR2 family member 3 (Aff3), transcript variant X3, mRNA	9.14	-1.4	1.1e-06
XM_028866950.2	1829	Adap2	ArfGAP with dual PH domains 2 (Adap2), transcript variant X2, mRNA	2.12	4.72	1.1e-06
XM_028869113.2	2436	Igf2bp1	insulin like growth factor 2 mRNA binding protein 1 (Igf2bp1), transcript variant X2, mRNA	0.76	4.5	1.1e-06
XM_028861005.2	1649	LOC114686342	uncharacterized LOC114686342 (LOC114686342), mRNA	32.46	-1.87	1.2e-06
XM_028873954.2	6770	Fosl2	FOS like 2, AP-1 transcription factor subunit (Fosl2), transcript variant X2, mRNA	18.84	1.77	1.2e-06
XM_028867388.2	2048	Tank	TRAF family member associated NFKB activator (Tank), transcript variant X4, mRNA	6.75	1.88	1.2e-06
XM_037201331.1	6777	Pitpnm3	PITPNM family member 3 (Pitpnm3), mRNA	4.77	-2.16	1.2e-06
XM_037204502.1	6487	Cntrl	centriolin (Cntrl), transcript variant X14, mRNA	3.28	1.71	1.2e-06
XM_028877403.2	1515	Arg1	arginase 1 (Arg1), transcript variant X1, mRNA	336.72	3.21	1.3e-06
XM_037209849.1	867	LOC114687105	immunoglobulin lambda-1 light chain-like (LOC114687105), transcript variant X3, mRNA	82.23	-1.37	1.3e-06
XM_028875192.2	1551	Rtp4	receptor transporter protein 4 (Rtp4), mRNA	63.68	1.62	1.3e-06
XM_028873243.2	3153	Sh3kbp1	SH3 domain containing kinase binding protein 1 (Sh3kbp1), transcript variant X3, mRNA	12.14	-1.94	1.3e-06
XM_028858325.2	2942	Siglece	sialic acid-binding Ig-like lectin 12 (LOC114683947), transcript variant X1, mRNA	11.07	1.96	1.3e-06
XM_037206424.1	3153	Nfkb2	nuclear factor kappa B subunit 2 (Nfkb2), transcript variant X4, mRNA	8.16	1.68	1.3e-06
XM_037207593.1	2835	Gramd1b	GRAM domain containing 1B (Gramd1b), transcript variant X11, mRNA	7.5	4.3	1.3e-06
XM_037200581.1	1551	Gas7	growth arrest specific 7 (Gas7), transcript variant X5, mRNA	3.49	4.01	1.3e-06
XM_028877231.2	3339	Tmem26	transmembrane protein 26 (Tmem26), mRNA	1.83	-3.47	1.3e-06
XR_005091408.1	1572	Rassf2	Ras association domain family member 2 (Rassf2), transcript variant X1, misc_RNA	1.08	9.82	1.3e-06
XR_005090015.1	424	LOC119086670	uncharacterized LOC119086670 (LOC119086670), ncRNA	39.29	2.88	1.4e-06
XM_028866659.2	5195	Map3k4	mitogen-activated protein kinase kinase kinase 4 (Map3k4), mRNA	8.59	-1.27	1.4e-06
XM_028876965.2	5542	Tmem164	transmembrane protein 164 (Tmem164), transcript variant X1, mRNA	8.41	2.37	1.4e-06
XM_037197974.1	4235	Furin	furin, paired basic amino acid cleaving enzyme (Furin), transcript variant X2, mRNA	5.69	2.09	1.4e-06
XM_028883393.2	7894	Pign	phosphatidylinositol glycan anchor biosynthesis class N (Pign), transcript variant X1, mRNA	0.23	-7.05	1.4e-06
XM_028893864.2	2314	Vasp	vasodilator stimulated phosphoprotein (LOC114709870), transcript variant X2, mRNA	92.49	1.63	1.5e-06
XM_028857121.2	421	Grap	GRB2-related adapter protein-like (LOC114682967), mRNA	87.41	-1.67	1.5e-06
XM_028885276.2	9185	Helz2	helicase with zinc finger 2 (Helz2), transcript variant X1, mRNA	30.35	1.95	1.5e-06
XM_037206546.1	2813	Gm10323	zinc finger protein 431-like (LOC119088154), transcript variant X1, mRNA	6.95	1.93	1.5e-06
XM_037197363.1	2233	Atf1	activating transcription factor 1 (Atf1), transcript variant X2, mRNA	5.67	2.08	1.5e-06
XM_037207646.1	4106	Kirrel3	kirre like nephrin family adhesion molecule 3 (Kirrel3), transcript variant X1, mRNA	0.32	8.93	1.5e-06
XM_028887200.2	2723	Ccnd3	cyclin D3 (Ccnd3), transcript variant X1, mRNA	25.03	1.59	1.6e-06
XM_028885659.2	1121	Rgs10	regulator of G protein signaling 10 (Rgs10), transcript variant X1, mRNA	23.92	-1.77	1.6e-06
XM_028889397.2	1840	Ubtd1	ubiquitin domain containing 1 (Ubtd1), transcript variant X1, mRNA	8.38	2.14	1.6e-06
XM_037211761.1	6048	Ddx60	probable ATP-dependent RNA helicase DDX60 (LOC114701096), mRNA	8.05	1.93	1.6e-06
XM_028876188.2	2362	Slc16a14	solute carrier family 16 member 14 (Slc16a14), mRNA	1.24	5.21	1.6e-06
XM_028858994.2	3338	Capn2	calpain 2 (Capn2), mRNA	38.6	-1.4	1.7e-06
XM_028887201.2	1899	Ccnd3	cyclin D3 (Ccnd3), transcript variant X4, mRNA	17.9	1.46	1.7e-06
XM_037202034.1	2971	Csf2ra	granulocyte-macrophage colony-stimulating factor receptor subunit alpha-like (LOC114682475), transcript variant X3, mRNA	7.78	2.33	1.7e-06
XM_028872260.2	3883	Lrrn3	leucine rich repeat neuronal 3 (Lrrn3), transcript variant X1, mRNA	4.23	-1.84	1.7e-06
XM_028854883.2	1087	Hopx	HOP homeobox (Hopx), transcript variant X1, mRNA	79.18	-1.54	1.8e-06
XR_005091630.1	2598	Adgre5	adhesion G protein-coupled receptor E5 (Adgre5), transcript variant X4, misc_RNA	15.86	1.54	1.8e-06
XM_037209711.1	4315	Nfkbiz	NFKB inhibitor zeta (Nfkbiz), transcript variant X2, mRNA	2.09	2.69	1.8e-06
XM_037206552.1	5233	Ide	insulin degrading enzyme (Ide), transcript variant X3, mRNA	0.59	-9.41	1.8e-06
XM_028885415.2	3311	Ncdn	neurochondrin (Ncdn), transcript variant X3, mRNA	0.34	8.54	1.8e-06
XR_003735908.2	616	LOC114701976	uncharacterized LOC114701976 (LOC114701976), ncRNA	85.96	-1.87	1.9e-06
XM_028876855.2	4318	Prkacb	protein kinase cAMP-activated catalytic subunit beta (Prkacb), transcript variant X2, mRNA	37.93	-1.37	1.9e-06
XM_028856203.2	1814	Tubb6	tubulin beta 6 class V (Tubb6), mRNA	10.16	2.73	1.9e-06
XM_028895263.2	10845	Gprin3	GPRIN family member 3 (Gprin3), mRNA	8.49	-1.76	1.9e-06
XM_028862822.2	2023	Hmgcs2	3-hydroxy-3-methylglutaryl-CoA synthase 2 (Hmgcs2), transcript variant X1, mRNA	1.58	-4.92	1.9e-06
XM_028858319.2	2910	Siglecf	sialic acid-binding Ig-like lectin 5 (LOC114683944), mRNA	0.56	3.99	1.9e-06
XM_028869692.1	7133	Arhgap5	Rho GTPase activating protein 5 (Arhgap5), transcript variant X1, mRNA	0.39	-9.06	1.9e-06
XM_028874204.2	3516	Rab10	RAB10, member RAS oncogene family (Rab10), transcript variant X1, mRNA	55.89	1.42	2e-06
XM_028891750.2	4725	Pik3cg	phosphatidylinositol-4,5-bisphosphate 3-kinase catalytic subunit gamma (Pik3cg), transcript variant X1, mRNA	20.38	1.92	2e-06
XM_028884671.2	1308	Fam78a	family with sequence similarity 78 member A (Fam78a), mRNA	26.39	-1.53	2.1e-06
XM_028861564.2	1987	Trim30a	tripartite motif-containing protein 30A-like (LOC114686894), transcript variant X1, mRNA	20.3	1.41	2.1e-06
XM_028857764.2	4307	Abca1	phospholipid-transporting ATPase ABCA1-like (LOC114683452), mRNA	14.1	1.61	2.1e-06
XM_028855276.2	674	Polr2i	RNA polymerase II subunit I (Polr2i), transcript variant X1, mRNA	2.14	7.33	2.1e-06
XM_028873946.2	5757	Rasef	RAS and EF-hand domain containing (Rasef), mRNA	1.35	-2.35	2.1e-06
XM_028881753.2	4187	Hip	hedgehog interacting protein (LOC114701622), mRNA	0.79	3.71	2.1e-06
XM_037209837.1	2481	Liph	lipase H (Liph), mRNA	0.62	6.74	2.1e-06
XM_028865589.2	3405	Slamf7	SLAM family member 7 (Slamf7), mRNA	31.39	1.87	2.2e-06
XM_028854151.2	10191	Vcan	versican (Vcan), transcript variant X2, mRNA	24.77	2.07	2.2e-06
XM_028877510.2	7104	Arrb1	arrestin beta 1 (Arrb1), transcript variant X8, mRNA	7.53	-1.6	2.3e-06
XM_037202036.1	2946	Csf2ra	granulocyte-macrophage colony-stimulating factor receptor subunit alpha-like (LOC114682475), transcript variant X5, mRNA	5.07	1.99	2.3e-06
XM_028872539.2	1360	Acp5	acid phosphatase 5, tartrate resistant (Acp5), transcript variant X2, mRNA	47.04	-1.78	2.5e-06
XM_028866987.2	3536	Rffl	ring finger and FYVE like domain containing E3 ubiquitin protein ligase (Rffl), transcript variant X2, mRNA	7.77	2.01	2.5e-06
XM_028887202.2	1658	Ccnd3	cyclin D3 (Ccnd3), transcript variant X5, mRNA	7.63	6.31	2.5e-06
XM_037210902.1	1259	Adss1	adenylosuccinate synthase 1 (Adss1), transcript variant X2, mRNA	2.16	-3.91	2.5e-06
XM_028874657.2	5604	Slk	STE20 like kinase (Slk), transcript variant X2, mRNA	18.4	1.46	2.6e-06
XM_028890549.2	820	Ccl4	C-C motif chemokine 4-like (LOC114707728), mRNA	16.53	3.47	2.6e-06
XM_028861094.2	4343	Wdr26	WD repeat domain 26 (Wdr26), mRNA	67.3	1.58	2.7e-06
XM_028894437.2	2560	Vgf	VGF nerve growth factor inducible (Vgf), transcript variant X1, mRNA	0.58	9.12	2.7e-06
XM_028876433.2	2645	Ezh2	enhancer of zeste 2 polycomb repressive complex 2 subunit (Ezh2), transcript variant X3, mRNA	6.58	1.68	2.8e-06
XM_028879378.2	6668	Sort1	sortilin 1 (Sort1), transcript variant X1, mRNA	5.11	2.07	2.8e-06
XM_028856303.2	3243	S1pr1	sphingosine-1-phosphate receptor 1 (S1pr1), mRNA	71.03	-1.4	3e-06
XR_003736864.2	1574	Pgs1	phosphatidylglycerophosphate synthase 1 (Pgs1), transcript variant X2, misc_RNA	5.3	2.4	3e-06
XM_037200096.1	2604	Ctu1	cytosolic thiouridylase subunit 1 (Ctu1), transcript variant X3, mRNA	2.67	4.43	3e-06
XR_005090143.1	3721	LOC119086786	uncharacterized LOC119086786 (LOC119086786), ncRNA	1.43	2.96	3e-06
XM_028862664.2	1756	Aadacl2	arylacetamide deacetylase-like 2 (LOC114688041), mRNA	0.57	4.6	3e-06
XM_028860313.2	4522	Tmem181	transmembrane protein 181 (Tmem181), transcript variant X2, mRNA	0.42	6.86	3e-06
XR_005091403.1	2079	LOC114709510	uncharacterized LOC114709510 (LOC114709510), transcript variant X1, ncRNA	0.29	6.62	3e-06
XM_037204151.1	1113	Clec4a	C-type lectin domain family 4 member A-like (LOC114706495), transcript variant X2, mRNA	19.78	1.91	3.1e-06
XM_037209189.1	5094	Antxr2	ANTXR cell adhesion molecule 2 (Antxr2), transcript variant X2, mRNA	9.63	3.31	3.1e-06
XM_028856426.2	1585	Dnajc25	DnaJ heat shock protein family (Hsp40) member C25 (Dnajc25), mRNA	6.79	2.08	3.1e-06
XR_005092948.1	535	LOC119089118	uncharacterized LOC119089118 (LOC119089118), ncRNA	2.85	4.44	3.2e-06
XM_028864449.1	5576	Suco	SUN domain containing ossification factor (Suco), mRNA	11.55	1.42	3.6e-06
XM_028856864.2	1607	Tmem106a	transmembrane protein 106A (Tmem106a), transcript variant X2, mRNA	10.29	2.23	3.6e-06
XM_028858147.2	997	Gzmb	granzyme B-like (LOC114683802), mRNA	49.75	2.24	3.7e-06
XR_005089482.1	4571	Arap1	ArfGAP with RhoGAP domain, ankyrin repeat and PH domain 1 (Arap1), transcript variant X8, misc_RNA	8.86	1.74	3.7e-06
XM_028874581.2	2183	Atf1	activating transcription factor 1 (Atf1), transcript variant X3, mRNA	6.22	1.87	3.8e-06
XM_037197675.1	3554	Cbx7	chromobox 7 (Cbx7), transcript variant X2, mRNA	0.35	-6.27	3.8e-06
XM_028886974.2	3344	Pfkfb4	6-phosphofructo-2-kinase/fructose-2,6-biphosphatase 4 (Pfkfb4), mRNA	30.12	1.76	3.9e-06
XM_028864148.2	3355	Skap2	src kinase associated phosphoprotein 2 (Skap2), transcript variant X1, mRNA	99.59	1.67	4e-06
XM_028874469.2	1016	Prr13	proline rich 13 (Prr13), transcript variant X1, mRNA	64.65	1.45	4e-06
XM_028886019.2	5355	Dennd3	DENN domain containing 3 (Dennd3), transcript variant X1, mRNA	10.63	1.73	4e-06
XR_005090583.1	889	LOC114688709	uncharacterized LOC114688709 (LOC114688709), ncRNA	2.63	-6.98	4e-06
XM_028881926.2	1850	Fam47e	protein FAM47E (LOC114701756), mRNA	0.7	-4.52	4e-06
XM_037196661.1	2617	Dgka	diacylglycerol kinase alpha (Dgka), transcript variant X2, mRNA	54.55	-1.72	4.1e-06
XM_028876487.2	2395	Lax1	lymphocyte transmembrane adaptor 1 (Lax1), mRNA	25.78	-1.68	4.1e-06
XM_028888362.2	8978	Itpr3	inositol 1,4,5-trisphosphate receptor type 3 (Itpr3), mRNA	16.29	-1.61	4.1e-06
XM_028859122.2	3629	Samd4b	sterile alpha motif domain containing 4B (Samd4b), mRNA	13.91	1.31	4.1e-06
XM_028891743.2	2650	Nampt	nicotinamide phosphoribosyltransferase (Nampt), mRNA	37.36	1.25	4.2e-06
XM_028868490.2	3467	Elmo2	engulfment and cell motility 2 (Elmo2), transcript variant X1, mRNA	17.63	-1.24	4.3e-06
XM_028892317.2	1199	Cd9	CD9 molecule (Cd9), mRNA	198.15	1.43	4.4e-06
XM_028861694.2	3108	Il20ra	interleukin 20 receptor subunit alpha (Il20ra), transcript variant X2, mRNA	0.8	4.57	4.4e-06
XM_037207836.1	1601	Plscr2	phospholipid scramblase 2 (LOC114690952), transcript variant X3, mRNA	0.71	8.61	4.4e-06
XM_028876305.2	3968	Arl4c	ADP ribosylation factor like GTPase 4C (Arl4c), mRNA	30.34	-1.6	4.5e-06
XM_037206657.1	2098	B3galnt1	beta-1,3-N-acetylgalactosaminyltransferase 1 (globoside blood group) (B3galnt1), transcript variant X5, mRNA	4.94	3.9	4.5e-06
XM_028894163.2	2134	Rtn4rl2	reticulon 4 receptor like 2 (Rtn4rl2), transcript variant X2, mRNA	1.24	4.44	4.5e-06
XM_028872275.2	1825	Ifrd1	interferon related developmental regulator 1 (Ifrd1), transcript variant X1, mRNA	13.04	1.88	4.6e-06
XM_037207313.1	278	Rps25	40S ribosomal protein S29-like (LOC114695364), mRNA	11.51	-7.12	4.6e-06
XM_028861826.1	3334	Pcdhga11	protocadherin gamma-A11-like (LOC114687126), mRNA	0.74	3.29	4.6e-06
XM_028866855.1	2730	Flot2	flotillin 2 (Flot2), transcript variant X3, mRNA	10.53	2.36	4.7e-06
XM_037201406.1	2522	Tnip1	TNFAIP3 interacting protein 1 (Tnip1), transcript variant X9, mRNA	15.95	1.66	4.8e-06
XM_028855425.2	4096	Itga7	integrin subunit alpha 7 (Itga7), transcript variant X9, mRNA	0.35	5.85	4.8e-06
XM_028867721.2	2171	Cd83	CD83 molecule (Cd83), mRNA	20.77	1.79	5e-06
XM_028855363.2	2537	Gbp1	guanylate-binding protein 1-like (LOC114681708), mRNA	2.26	2.76	5.1e-06
XR_005091752.1	1778	LOC119088159	uncharacterized LOC119088159 (LOC119088159), ncRNA	0.53	4.89	5.1e-06
XR_005090628.1	248	LOC119087186	uncharacterized LOC119087186 (LOC119087186), ncRNA	133.81	-2.08	5.2e-06
XM_037209721.1	3155	Hhla2	HERV-H LTR-associating 2 (Hhla2), transcript variant X1, mRNA	21.77	1.55	5.2e-06
XM_028871183.1	1722	Atf4	activating transcription factor 4 (Atf4), mRNA	92.01	1.34	5.3e-06
XM_037199528.1	4202	Arid5a	AT-rich interaction domain 5A (Arid5a), transcript variant X5, mRNA	2.57	3.06	5.3e-06
XM_037204148.1	2205	Clec4e	C-type lectin domain family 4 member E (Clec4e), transcript variant X2, mRNA	1.81	2.81	5.3e-06
XM_037208514.1	8076	Nynrin	NYN domain and retroviral integrase containing (Nynrin), mRNA	0.72	-2.75	5.4e-06
XM_028882068.2	2812	Angpt2	angiopoietin 2 (Angpt2), mRNA	7.47	-2.09	5.5e-06
XM_037206061.1	3284	Man2b1	mannosidase alpha class 2B member 1 (Man2b1), mRNA	50.12	1.35	5.7e-06
XM_028887804.2	2677	Plat	plasminogen activator, tissue type (Plat), mRNA	2.61	3.07	5.7e-06
XM_028860386.2	3279	Fzd7	frizzled class receptor 7 (Fzd7), mRNA	1.32	3.98	5.7e-06
XM_028872782.2	3908	Arrdc4	arrestin domain containing 4 (Arrdc4), transcript variant X2, mRNA	15.25	1.31	5.8e-06
XM_028858549.2	2596	Pwwp3a	PWWP domain containing 3A, DNA repair factor (Pwwp3a), transcript variant X1, mRNA	15.66	-1.38	5.9e-06
XM_028887658.2	1978	Tinagl1	tubulointerstitial nephritis antigen like 1 (Tinagl1), mRNA	2.84	2.99	5.9e-06
XM_028887459.2	7477	Plagl2	PLAG1 like zinc finger 2 (Plagl2), transcript variant X2, mRNA	1.01	2.7	5.9e-06
XM_037210968.1	4559	Hdac9	histone deacetylase 9 (Hdac9), transcript variant X15, mRNA	0.8	-4.23	5.9e-06
XM_028856765.2	992	Tspo	translocator protein (Tspo), transcript variant X2, mRNA	51.79	1.92	6.1e-06
XM_028869769.2	1408	Gpr33	G protein-coupled receptor 33 (Gpr33), mRNA	3.18	3.31	6.1e-06
XM_037203622.1	14526	LOC114684453	uncharacterized LOC114684453 (LOC114684453), mRNA	30.36	2.28	6.2e-06
XR_005091113.1	1614	LOC119087630	uncharacterized LOC119087630 (LOC119087630), transcript variant X1, ncRNA	24.06	-1.95	6.3e-06
XM_028872182.2	2970	Ptpro	protein tyrosine phosphatase receptor type O (Ptpro), transcript variant X4, mRNA	5.59	-2.67	6.5e-06
XM_028877112.2	1784	Il10rb	interleukin 10 receptor subunit beta (Il10rb), mRNA	46.39	1.33	6.6e-06
XM_028878465.2	2378	Lacc1	laccase domain containing 1 (Lacc1), mRNA	11.63	1.74	6.6e-06
XR_005090145.1	1075	LOC119086788	uncharacterized LOC119086788 (LOC119086788), ncRNA	0.92	4.76	6.6e-06
XM_028868679.2	1730	Il1rn	interleukin 1 receptor antagonist (Il1rn), transcript variant X5, mRNA	0.41	8.24	6.7e-06
XM_028861083.2	2928	Nfam1	NFAT activating protein with ITAM motif 1 (Nfam1), mRNA	48.05	1.83	7e-06
XM_028862653.2	2679	Dtx3l	deltex E3 ubiquitin ligase 3L (Dtx3l), mRNA	42.1	1.37	7.1e-06
XM_028893084.2	1938	Wnt6	Wnt family member 6 (Wnt6), mRNA	0.63	4.47	7.2e-06
XM_028867318.2	2945	Gbp6	guanylate-binding protein 6-like (LOC114691793), transcript variant X2, mRNA	29.25	1.68	7.4e-06
XM_028856401.2	2602	Myd88	MYD88 innate immune signal transduction adaptor (Myd88), mRNA	75.11	1.35	7.5e-06
XM_028857172.2	3900	Nlrp3	NLR family pyrin domain containing 3 (Nlrp3), transcript variant X1, mRNA	34.71	1.85	7.7e-06
XM_028861026.2	1064	H2-Oa	HLA class II histocompatibility antigen, DO alpha chain (LOC114686361), transcript variant X1, mRNA	30.37	-1.71	7.7e-06
XM_037198385.1	831	Alox5ap	arachidonate 5-lipoxygenase activating protein (LOC114699150), transcript variant X3, mRNA	23.53	2.03	7.7e-06
XM_028863178.2	1799	Tgtp2	T-cell-specific guanine nucleotide triphosphate-binding protein 2-like (LOC114688611), mRNA	7.18	1.86	7.7e-06
XR_005092044.1	1014	LOC119088372	uncharacterized LOC119088372 (LOC119088372), ncRNA	3.68	2.96	7.7e-06
XM_028877195.2	6396	Wrn	WRN RecQ like helicase (Wrn), transcript variant X2, mRNA	0.18	9.48	7.7e-06
XM_028875825.2	1413	Adm	adrenomedullin (Adm), mRNA	2.33	4.51	7.8e-06
XM_037197585.1	1298	Eed	embryonic ectoderm development (Eed), transcript variant X3, mRNA	9.97	1.87	7.9e-06
XR_005092327.1	2446	LOC119088643	uncharacterized LOC119088643 (LOC119088643), ncRNA	7.24	2.02	7.9e-06
XM_028880447.2	5103	Tmem121b	transmembrane protein 121B (Tmem121b), mRNA	2.5	-2.96	8e-06
XM_028878571.2	1919	Rnd3	Rho family GTPase 3 (Rnd3), mRNA	8.05	2.11	8.1e-06
XM_028881500.2	1771	Olr1	oxidized low density lipoprotein receptor 1 (Olr1), mRNA	2.63	2.96	8.1e-06
XM_028870827.2	12166	Htt	huntingtin (Htt), transcript variant X2, mRNA	0.08	9.49	8.1e-06
XM_037198881.1	3456	Septin6	septin 6 (Septin6), transcript variant X6, mRNA	34.64	-1.33	8.2e-06
XM_028860276.2	1339	Mrgpra1	mas-related G-protein coupled receptor member A (LOC114685646), transcript variant X1, mRNA	11.53	1.99	8.2e-06
XM_028865988.2	3005	Plod2	procollagen-lysine,2-oxoglutarate 5-dioxygenase 2 (Plod2), transcript variant X1, mRNA	3.81	4.7	8.2e-06
XM_028886828.2	2355	Hbegf	heparin binding EGF like growth factor (Hbegf), transcript variant X1, mRNA	3.44	2.44	8.2e-06
XM_037208055.1	6909	Nktr	natural killer cell triggering receptor (Nktr), transcript variant X1, mRNA	0.13	9.88	8.2e-06
XM_028869109.2	3455	Lasp1	LIM and SH3 protein 1 (Lasp1), mRNA	112.56	1.43	8.4e-06
XM_028871857.2	5069	Mtss1	MTSS I-BAR domain containing 1 (Mtss1), transcript variant X6, mRNA	0.31	-8.29	8.5e-06
XM_028856677.2	3839	Lztr1	leucine zipper like transcription regulator 1 (Lztr1), mRNA	35.77	1.5	8.6e-06
XM_028884260.2	3346	Cpsf7	cleavage and polyadenylation specific factor 7 (Cpsf7), transcript variant X5, mRNA	0.32	9.48	8.6e-06
XM_037205509.1	8808	Rfx3	regulatory factor X3 (Rfx3), transcript variant X6, mRNA	0.13	9.15	8.6e-06
XM_028892100.2	1648	Irf9	interferon regulatory factor 9 (Irf9), transcript variant X1, mRNA	24.95	1.59	8.7e-06
XM_028873823.2	3454	Tlnrd1	talin rod domain containing 1 (Tlnrd1), mRNA	8.93	2.13	8.7e-06
XM_028883888.2	10285	Ar	androgen receptor (Ar), mRNA	1.65	-2.46	8.7e-06
XM_037205583.1	3209	Cd274	CD274 molecule (Cd274), transcript variant X2, mRNA	1.11	3.08	8.7e-06
XM_037207627.1	853	Pate1	prostate and testis expressed 1 (Pate1), mRNA	1.11	3.94	8.7e-06
XM_028889303.2	2001	Tbxas1	thromboxane A synthase 1 (Tbxas1), transcript variant X1, mRNA	27.93	1.29	8.8e-06
XM_028872814.2	3837	Chsy1	chondroitin sulfate synthase 1 (Chsy1), mRNA	16.04	1.15	8.9e-06
XM_037203624.1	920	Clec5a	C-type lectin domain containing 5A (Clec5a), transcript variant X3, mRNA	10.32	2.59	9e-06
XM_028894868.2	4944	Nlrc3	NLR family CARD domain containing 3 (Nlrc3), transcript variant X2, mRNA	14.66	-1.55	9.5e-06
XM_028879115.2	3635	Macir	macrophage immunometabolism regulator (Macir), transcript variant X2, mRNA	2.41	2.57	9.5e-06
XM_028861134.2	1388	Rab32	RAB32, member RAS oncogene family (Rab32), mRNA	31.04	2.06	9.7e-06
XM_037209579.1	1288	Pgd	6-phosphogluconate dehydrogenase, decarboxylating-like (LOC114692439), mRNA	67.75	1.73	1e-05
XM_028865223.2	4072	Ifih1	interferon induced with helicase C domain 1 (Ifih1), mRNA	22.72	1.34	1e-05
XM_037209869.1	1578	Igf2bp2	insulin-like growth factor 2 mRNA-binding protein 2 (LOC114684920), mRNA	1.45	3.55	1e-05
XM_028866041.2	3073	Pxylp1	2-phosphoxylose phosphatase 1 (Pxylp1), transcript variant X3, mRNA	1.15	5.38	1e-05
XM_028890452.2	2614	Ccdc13	coiled-coil domain containing 13 (Ccdc13), transcript variant X2, mRNA	0.28	5.37	1e-05
XM_028860338.2	918	Fth1	ferritin heavy chain (LOC114685692), mRNA	14069.9	1.58	1.1e-05
XM_028856427.2	1076	Gng10	G protein subunit gamma 10 (Gng10), transcript variant X1, mRNA	468.86	1.65	1.1e-05
XM_037199666.1	2777	Kir3dp1	putative killer cell immunoglobulin-like receptor like protein KIR3DP1 (LOC114686723), mRNA	34.12	1.61	1.1e-05
XM_028878799.2	9723	Med13l	mediator complex subunit 13L (Med13l), transcript variant X3, mRNA	11.76	1.41	1.1e-05
XM_037206098.1	6244	Nlrc5	NLR family CARD domain containing 5 (Nlrc5), transcript variant X7, mRNA	3.09	1.69	1.1e-05
XM_028860454.2	4087	Lrrc3	leucine rich repeat containing 3 (Lrrc3), mRNA	2	2.73	1.1e-05
XR_003734701.2	6528	LOC114694404	uncharacterized LOC114694404 (LOC114694404), transcript variant X1, ncRNA	0.66	-5.08	1.1e-05
XM_028854779.2	2549	Oas2	2'-5'-oligoadenylate synthase-like protein 2 (LOC114681329), transcript variant X1, mRNA	86.94	2.37	1.2e-05
XM_037198005.1	1896	LOC119086450	uncharacterized; pollen-specific leucine-rich repeat extensin-like protein 1 (LOC119086450), partial mRNA	55.26	2.72	1.2e-05
XM_028892598.2	4761	Cyfip1	cytoplasmic FMR1 interacting protein 1 (Cyfip1), mRNA	34.77	1.36	1.2e-05
XM_028861178.2	2701	Tcf3	transcription factor 3 (Tcf3), mRNA	26.63	-1.21	1.2e-05
XM_028883695.2	1942	Pld4	phospholipase D family member 4 (Pld4), transcript variant X1, mRNA	23.75	-1.76	1.2e-05
XM_028855061.1	1945	Pld3	phospholipase D family member 3 (Pld3), transcript variant X2, mRNA	21.76	1.56	1.2e-05
XM_037201201.1	13870	Rnf213	E3 ubiquitin-protein ligase RNF213-like (LOC114688093), mRNA	6.78	1.66	1.2e-05
XM_028858963.2	5205	Prdm1	PR/SET domain 1 (Prdm1), transcript variant X1, mRNA	3.3	2.32	1.2e-05
XM_028859320.2	4021	Mroh6	maestro heat like repeat family member 6 (Mroh6), mRNA	2.09	2.51	1.2e-05
XM_028863000.2	2882	Iigp1	interferon-inducible GTPase 1-like (LOC114688415), mRNA	1.74	3.06	1.2e-05
XR_005091978.1	2335	LOC119088333	uncharacterized LOC119088333 (LOC119088333), ncRNA	0.45	3.96	1.2e-05
XM_028886072.2	2523	Hspa5	heat shock protein family A (Hsp70) member 5 (Hspa5), mRNA	215.37	1.32	1.3e-05
XM_037201739.1	1247	Pilrb2	paired immunoglobulin-like type 2 receptor beta (LOC114687976), transcript variant X2, mRNA	63.97	-1.56	1.3e-05
XM_028861318.2	3723	Apobr	apolipoprotein B receptor (Apobr), mRNA	52.68	1.6	1.3e-05
XM_028891129.2	2262	Scd2	stearoyl-CoA desaturase 2 (LOC114708114), mRNA	28.91	-1.73	1.3e-05
XM_028872065.2	1881	Btla	B and T lymphocyte associated (Btla), mRNA	23.07	-1.5	1.3e-05
XM_028877649.2	2811	Lpar6	lysophosphatidic acid receptor 6 (Lpar6), mRNA	9.49	-1.61	1.3e-05
XR_003733485.2	193	LOC114685689	uncharacterized LOC114685689 (LOC114685689), ncRNA	6.84	5.22	1.3e-05
XM_037197955.1	2360	Pram1	PML-RARA regulated adaptor molecule 1 (Pram1), transcript variant X5, mRNA	6.58	2.76	1.3e-05
XM_028871169.2	3556	Cbx7	chromobox 7 (Cbx7), transcript variant X1, mRNA	4.43	-2.12	1.3e-05
XM_028888092.2	5627	Adamts3	ADAM metallopeptidase with thrombospondin type 1 motif 3 (Adamts3), mRNA	2.08	2.13	1.3e-05
XR_005090268.1	447	LOC119086882	uncharacterized LOC119086882 (LOC119086882), ncRNA	1.8	6.87	1.3e-05
XM_028874545.2	2345	Bin2	bridging integrator 2 (Bin2), transcript variant X1, mRNA	0.85	9.21	1.3e-05
XM_028886547.2	2023	B4galt6	beta-1,4-galactosyltransferase 6 (B4galt6), transcript variant X2, mRNA	7.67	2.2	1.4e-05
XM_028865165.2	4261	Ace	angiotensin-converting enzyme (LOC114690399), mRNA	4.55	-2.45	1.4e-05
XM_028883716.2	4841	Tdrd9	tudor domain containing 9 (Tdrd9), transcript variant X2, mRNA	2.67	-2.28	1.4e-05
XM_028878234.2	2825	Lpo	lactoperoxidase (LOC114699258), transcript variant X1, mRNA	0.26	7.38	1.4e-05
XM_028873188.2	1073	Cxcl13	C-X-C motif chemokine ligand 13 (Cxcl13), mRNA	74.59	3.61	1.5e-05
XM_028866150.2	4228	Rab8b	RAB8B, member RAS oncogene family (Rab8b), mRNA	35.36	1.27	1.5e-05
XM_028889473.2	3173	Rara	retinoic acid receptor alpha (Rara), transcript variant X5, mRNA	12.45	1.44	1.5e-05
XM_028880928.2	2645	Cdca7l	cell division cycle associated 7 like (Cdca7l), transcript variant X4, mRNA	7.45	-1.76	1.5e-05
XM_028860089.2	651	Fcer1g	Fc fragment of IgE receptor Ig (Fcer1g), mRNA	677.53	1.44	1.6e-05
XM_028862159.2	1610	Cxcl16	C-X-C motif chemokine ligand 16 (Cxcl16), mRNA	19.65	1.85	1.6e-05
XM_028878155.2	2145	Gramd4	GRAM domain containing 4 (Gramd4), transcript variant X1, mRNA	16.43	-1.95	1.6e-05
XM_028869004.2	3798	Znf652	zinc finger protein 652 (Znf652), mRNA	6.05	-1.34	1.6e-05
XM_037205917.1	6320	Gpr141	G protein-coupled receptor 141 (Gpr141), transcript variant X3, mRNA	5.44	1.55	1.6e-05
XM_028861029.2	1432	H2-Ma	class II histocompatibility antigen, M alpha chain (LOC114686363), transcript variant X2, mRNA	4.24	-5.17	1.6e-05
XM_028891113.1	2758	Lzts2	leucine zipper tumor suppressor 2 (Lzts2), transcript variant X1, mRNA	0.27	8.39	1.6e-05
XM_028879543.2	2970	Agap3	ArfGAP with GTPase domain, ankyrin repeat and PH domain 3 (Agap3), transcript variant X5, mRNA	6.89	-1.59	1.7e-05
XM_028888632.2	5974	Synj2	synaptojanin 2 (Synj2), mRNA	3.36	-1.73	1.7e-05
XM_037207645.1	2011	St3gal4	ST3 beta-galactoside alpha-2,3-sialyltransferase 4 (St3gal4), transcript variant X10, mRNA	35	1.3	1.8e-05
XM_028889957.2	1880	Dennd2d	DENN domain containing 2D (Dennd2d), transcript variant X2, mRNA	21.44	1.17	1.8e-05
XM_028881317.2	3077	Ripk1	receptor interacting serine/threonine kinase 1 (Ripk1), transcript variant X2, mRNA	15.51	1.2	1.8e-05
XM_028875644.2	6317	Mef2c	myocyte enhancer factor 2C (Mef2c), transcript variant X7, mRNA	4.24	-2.48	1.8e-05
XM_028893917.2	6549	Cemip2	cell migration inducing hyaluronidase 2 (Cemip2), transcript variant X3, mRNA	3.65	3.21	1.8e-05
XM_028871068.2	4567	Csf2rb	colony stimulating factor 2 receptor subunit beta (Csf2rb), transcript variant X7, mRNA	3.15	4.26	1.8e-05
XM_037200342.1	1231	Il22ra2	interleukin-22 receptor subunit alpha-2 (LOC114686969), transcript variant X1, mRNA	0.8	8.46	1.8e-05
XM_028856266.2	1470	Ctss	cathepsin S (Ctss), mRNA	323.29	1.39	1.9e-05
XM_028856730.2	1269	Casp6	caspase 6 (Casp6), transcript variant X1, mRNA	20.1	-1.73	1.9e-05
XM_028864179.2	5884	Fam126a	family with sequence similarity 126 member A (Fam126a), transcript variant X1, mRNA	13.55	-1.16	1.9e-05
XM_028858455.1	4433	Clstn1	calsyntenin 1 (Clstn1), mRNA	10.78	-1.2	1.9e-05
XM_028856802.2	4658	Stat3	signal transducer and activator of transcription 3 (Stat3), transcript variant X4, mRNA	3.93	2.15	1.9e-05
XM_028875927.2	6739	Med14	mediator complex subunit 14 (Med14), transcript variant X1, mRNA	3.39	1.43	1.9e-05
XM_028877411.2	2147	Stx7	syntaxin 7 (Stx7), transcript variant X2, mRNA	35.92	1.8	2e-05
XM_028886190.2	1114	Srgn	serglycin (Srgn), transcript variant X3, mRNA	8.84	2.59	2e-05
XM_028862992.2	2109	Serpina3n	serine protease inhibitor A3N-like (LOC114688405), mRNA	2.56	2.65	2e-05
XM_037200582.1	1714	Gas7	growth arrest specific 7 (Gas7), transcript variant X6, mRNA	1.42	4.48	2e-05
XM_028863737.1	3808	Unc5a	unc-5 netrin receptor A (Unc5a), transcript variant X3, mRNA	0.8	4.31	2e-05
XM_037198630.1	8967	Cit	citron rho-interacting serine/threonine kinase (Cit), transcript variant X3, mRNA	0.1	8.39	2e-05
XM_037202486.1	4462	Ankrd6	ankyrin repeat domain 6 (Ankrd6), transcript variant X5, mRNA	0.08	5.96	2e-05
XM_028872062.2	2304	Cd200	OX-2 membrane glycoprotein (LOC114694956), transcript variant X1, mRNA	8.21	-1.67	2.1e-05
XM_028869070.2	3501	Npepps	aminopeptidase puromycin sensitive (Npepps), transcript variant X1, mRNA	7.19	1.95	2.1e-05
XM_028879086.2	3948	Pam	peptidylglycine alpha-amidating monooxygenase (Pam), mRNA	6.04	1.6	2.1e-05
XM_028888199.2	3219	Lin28a	lin-28 homolog A (Lin28a), mRNA	4	3.11	2.1e-05
XM_028873344.2	6324	Maml3	mastermind like transcriptional coactivator 3 (Maml3), transcript variant X1, mRNA	3.18	-1.72	2.1e-05
XM_028881867.2	4552	Rin2	Ras and Rab interactor 2 (Rin2), transcript variant X5, mRNA	2.47	2.74	2.1e-05
XM_037209780.1	7097	Parp14	poly(ADP-ribose) polymerase family member 14 (Parp14), mRNA	58.04	1.32	2.2e-05
XM_028880970.1	6215	Ablim1	actin binding LIM protein 1 (Ablim1), transcript variant X19, mRNA	38.34	-1.35	2.2e-05
XM_037206740.1	1889	Fcrl1	Fc receptor-like protein 1 (LOC114683366), mRNA	37.22	-1.41	2.2e-05
XM_037202573.1	6350	Pax5	paired box 5 (Pax5), transcript variant X5, mRNA	20.2	-1.49	2.2e-05
XM_028882774.2	5756	Tgfbr1	transforming growth factor beta receptor 1 (Tgfbr1), transcript variant X2, mRNA	16.1	1.43	2.2e-05
XM_028861090.2	1734	Ephx1	epoxide hydrolase 1 (LOC114686406), transcript variant X1, mRNA	13.42	-1.63	2.2e-05
XM_037206548.1	2637	Gm10323	zinc finger protein 431-like (LOC114688574), mRNA	4.37	1.8	2.2e-05
XM_028858346.2	1670	Klk9	kallikrein related peptidase 9 (Klk9), mRNA	2.24	4.89	2.2e-05
XM_028874534.2	4448	Fignl2	fidgetin like 2 (Fignl2), mRNA	0.13	5.97	2.2e-05
XM_028894103.2	2544	Nrros	negative regulator of reactive oxygen species (Nrros), transcript variant X3, mRNA	42.83	1.36	2.3e-05
XM_037197642.1	4772	Csf2rb	colony stimulating factor 2 receptor subunit beta (Csf2rb), transcript variant X9, mRNA	2.91	2.85	2.3e-05
XM_037204730.1	1817	Il1rn	interleukin 1 receptor antagonist (Il1rn), transcript variant X3, mRNA	1.54	4.98	2.3e-05
XM_037200172.1	5358	Il1r1	interleukin 1 receptor type 1 (Il1r1), transcript variant X3, mRNA	1.43	3.9	2.3e-05
XM_028877084.2	3483	Numb	NUMB endocytic adaptor protein (Numb), transcript variant X7, mRNA	25.1	1.48	2.4e-05
XM_028853756.2	4952	Ccdc88b	coiled-coil domain containing 88B (Ccdc88b), mRNA	22.25	1.35	2.4e-05
XM_028854789.2	3646	Xpc	XPC complex subunit, DNA damage recognition and repair factor (Xpc), transcript variant X1, mRNA	18.28	-1.17	2.4e-05
XM_028860481.2	1975	Cd1d	CD1d molecule (Cd1d), transcript variant X2, mRNA	10.28	-2.4	2.4e-05
XM_028893411.1	3544	Acss1	acyl-CoA synthetase short chain family member 1 (Acss1), mRNA	9.34	-1.62	2.4e-05
XM_028860062.2	5495	Rubcn	rubicon autophagy regulator (Rubcn), mRNA	8.08	-1.17	2.4e-05
XM_028855010.2	3004	Gfpt2	glutamine-fructose-6-phosphate transaminase 2 (Gfpt2), mRNA	1.98	3.28	2.4e-05
XM_028891346.2	4738	Pfkfb3	6-phosphofructo-2-kinase/fructose-2,6-biphosphatase 3 (Pfkfb3), transcript variant X4, mRNA	1.4	4.92	2.4e-05
XM_028872738.2	1686	Prok2	prokineticin 2 (Prok2), mRNA	42.27	2.36	2.5e-05
XM_028892728.2	6011	Atp8b4	ATPase phospholipid transporting 8B4 (putative) (Atp8b4), mRNA	23.8	1.74	2.5e-05
XM_028888745.2	2044	Ggt6	gamma-glutamyltransferase 6 (Ggt6), mRNA	9.28	1.78	2.5e-05
XM_028856652.2	726	Ubd	ubiquitin D (Ubd), mRNA	1.78	4.27	2.5e-05
XM_028864998.2	7499	Tmod2	tropomodulin 2 (Tmod2), transcript variant X1, mRNA	1.18	-4.6	2.5e-05
XM_028865350.2	3056	Ccpg1	cell cycle progression 1 (Ccpg1), transcript variant X4, mRNA	0.25	8.34	2.5e-05
XM_028863530.2	1220	H2-Ab1	rano class II histocompatibility antigen, A beta chain (LOC114689124), mRNA	188.55	-1.39	2.6e-05
XM_028887564.1	947	Fabp5	fatty acid binding protein 5 (Fabp5), transcript variant X1, mRNA	33.61	1.95	2.6e-05
XM_028881361.2	3233	Tfe3	transcription factor binding to IGHM enhancer 3 (Tfe3), transcript variant X2, mRNA	15.42	1.39	2.6e-05
XM_028875576.2	3451	Oxct1	3-oxoacid CoA-transferase 1 (Oxct1), mRNA	13.05	-1.22	2.6e-05
XM_037202314.1	1883	Ffar2	free fatty acid receptor 2 (Ffar2), transcript variant X2, mRNA	5.87	2.55	2.6e-05
XM_028859193.2	5198	C12H3orf70	chromosome 12 C3orf70 homolog (C12H3orf70), mRNA	2.15	-2.09	2.6e-05
XR_005090025.1	400	LOC119086679	uncharacterized LOC119086679 (LOC119086679), ncRNA	0.97	6.42	2.6e-05
XM_028857057.2	3081	Pid1	phosphotyrosine interaction domain containing 1 (Pid1), transcript variant X2, mRNA	0.91	5.4	2.6e-05
XM_028856274.2	1883	Ecm1	extracellular matrix protein 1 (Ecm1), transcript variant X1, mRNA	137.29	2.79	2.7e-05
XM_037202481.1	8618	Bach2	BTB domain and CNC homolog 2 (Bach2), mRNA	9.56	-1.28	2.7e-05
XM_028894336.2	3189	Lyn	LYN proto-oncogene, Src family tyrosine kinase (Lyn), transcript variant X2, mRNA	57.73	1.3	2.8e-05
XM_037203327.1	6059	Abca1	ATP binding cassette subfamily A member 1 (Abca1), mRNA	12.04	1.61	2.8e-05
XM_028894900.2	4204	Lcp2	lymphocyte cytosolic protein 2 (Lcp2), transcript variant X2, mRNA	11.97	1.15	2.8e-05
XM_037197992.1	5487	Man2a2	mannosidase alpha class 2A member 2 (Man2a2), transcript variant X2, mRNA	11.67	-1.8	2.8e-05
XM_028885051.2	5229	Abcg1	ATP binding cassette subfamily G member 1 (Abcg1), transcript variant X2, mRNA	6.46	-1.52	2.8e-05
XM_028894357.2	7709	Gvin1	interferon-induced very large GTPase 1-like (LOC114710254), mRNA	3.05	1.87	2.8e-05
XM_028872844.2	4572	Trpm1	transient receptor potential cation channel subfamily M member 1 (Trpm1), mRNA	1.06	-2.69	2.8e-05
XM_028861828.2	4763	Pcdhgc3	protocadherin gamma subfamily C, 3 (Pcdhgc3), mRNA	0.98	2.65	2.8e-05
XM_028873470.2	2420	Prcp	lysosomal Pro-X carboxypeptidase (LOC114695946), mRNA	40.5	-1.19	2.9e-05
XM_028858443.2	3481	Slc37a2	solute carrier family 37 member 2 (Slc37a2), transcript variant X4, mRNA	8.72	-1.84	2.9e-05
XM_028871653.2	1854	Scamp1	secretory carrier membrane protein 1 (Scamp1), transcript variant X2, mRNA	0.5	5.19	2.9e-05
XM_028860277.2	1338	Mrgpra1	mas-related G-protein coupled receptor member A (LOC114685646), transcript variant X2, mRNA	9.94	2.23	3e-05
XM_028885570.2	3077	LOC114704370	zinc finger protein 689 (LOC114704370), mRNA	7.99	1.56	3e-05
XR_005092734.1	571	LOC119088974	uncharacterized LOC119088974 (LOC119088974), ncRNA	0.85	4.84	3e-05
XM_028876296.2	2198	Ugt1a7c	UDP-glucuronosyltransferase 1-6 (LOC114697897), transcript variant X5, mRNA	25.06	1.63	3.1e-05
XM_028888440.2	1372	Mapk13	mitogen-activated protein kinase 13 (Mapk13), mRNA	19.14	1.74	3.1e-05
XM_037207599.1	2944	Vwa5a	von Willebrand factor A domain-containing protein 5A-like (LOC114691127), transcript variant X2, mRNA	5.78	3.25	3.1e-05
XM_037203914.1	3398	Iqsec1	IQ motif and Sec7 domain ArfGEF 1 (Iqsec1), transcript variant X10, mRNA	21.52	1.62	3.2e-05
XM_037203913.1	4516	Iqsec1	IQ motif and Sec7 domain ArfGEF 1 (Iqsec1), transcript variant X6, mRNA	20.59	1.3	3.3e-05
XM_028877939.2	1907	Rab3ip	RAB3A interacting protein (LOC114699030), transcript variant X1, mRNA	9.04	1.65	3.3e-05
XM_037211197.1	5016	Sdccag8	SHH signaling and ciliogenesis regulator SDCCAG8 (Sdccag8), transcript variant X4, mRNA	4.69	-1.39	3.3e-05
XM_037210623.1	21744	Syne2	spectrin repeat containing nuclear envelope protein 2 (Syne2), transcript variant X2, mRNA	0.03	8.23	3.3e-05
XM_028872063.2	2221	Cd200	OX-2 membrane glycoprotein (LOC114694956), transcript variant X2, mRNA	10.18	-1.58	3.4e-05
XM_028865812.2	3167	Tgfbrap1	transforming growth factor beta receptor associated protein 1 (Tgfbrap1), transcript variant X4, mRNA	0.46	-8.21	3.4e-05
XM_028892811.2	3796	Pcx	pyruvate carboxylase, mitochondrial (LOC114709141), transcript variant X1, mRNA	0.45	-8.37	3.4e-05
XM_037202171.1	1582	Lilrb4	leukocyte immunoglobulin-like receptor subfamily B member 4 (LOC114684190), transcript variant X3, mRNA	29.29	-1.86	3.5e-05
XM_028884282.2	3439	Fads1	fatty acid desaturase 1 (Fads1), mRNA	9.69	2.29	3.5e-05
XM_028864777.2	927	Uchl3	ubiquitin C-terminal hydrolase L3 (Uchl3), transcript variant X2, mRNA	22.69	1.35	3.6e-05
XM_028881591.2	2030	Pla1a	phospholipase A1 member A (Pla1a), mRNA	1.32	3.49	3.6e-05
XM_028869694.1	7127	Arhgap5	Rho GTPase activating protein 5 (Arhgap5), transcript variant X3, mRNA	0.23	-8.34	3.6e-05
XR_005092751.1	345	LOC119088989	uncharacterized LOC119088989 (LOC119088989), ncRNA	30.86	-2.3	3.7e-05
XM_028895313.2	3288	Dusp7	dual specificity phosphatase 7 (Dusp7), mRNA	9.01	-1.56	3.8e-05
XM_028889593.2	7499	Ikzf3	IKAROS family zinc finger 3 (Ikzf3), transcript variant X1, mRNA	8.73	-1.27	3.8e-05
XR_005091179.1	2122	LOC114688006	uncharacterized LOC114688006 (LOC114688006), ncRNA	7.33	1.72	3.8e-05
XM_028861096.2	6919	Stxbp5	syntaxin binding protein 5 (Stxbp5), transcript variant X2, mRNA	5.77	2.2	3.8e-05
XR_005089714.1	1946	LOC119086426	uncharacterized LOC119086426 (LOC119086426), transcript variant X2, ncRNA	4.12	2.62	3.8e-05
XM_037209842.1	4417	LOC114684244	uncharacterized LOC114684244 (LOC114684244), mRNA	47.2	1.59	3.9e-05
XM_028871898.2	4522	Zhx2	zinc fingers and homeoboxes 2 (Zhx2), mRNA	6.73	1.43	3.9e-05
XM_028859708.2	2113	Plin5	perilipin 5 (Plin5), transcript variant X1, mRNA	2.24	4.49	3.9e-05
XM_037205340.1	4782	Tp53inp2	tumor protein p53 inducible nuclear protein 2 (Tp53inp2), transcript variant X2, mRNA	0.99	3.96	3.9e-05
XM_028870186.2	3225	Sfswap	splicing factor SWAP (LOC114693683), transcript variant X2, mRNA	0.27	8.37	3.9e-05
XM_037204185.1	9473	Mical3	microtubule associated monooxygenase, calponin and LIM domain containing 3 (Mical3), transcript variant X11, mRNA	0.07	8.67	3.9e-05
XM_028859178.2	638	Gmfg	glia maturation factor gamma (Gmfg), transcript variant X4, mRNA	8.41	2.62	4e-05
XM_028861014.2	3077	Tap1	transporter 1, ATP binding cassette subfamily B member (Tap1), mRNA	45.75	1.2	4.1e-05
XM_028871403.2	688	Reg3a	regenerating islet-derived protein 3-alpha-like (LOC114694459), mRNA	0.7	7.69	4.1e-05
XM_028882008.2	5549	Abcb11	ATP binding cassette subfamily B member 11 (Abcb11), mRNA	0.12	4.44	4.1e-05
XM_037204728.1	1998	Cd5	CD5 molecule (Cd5), transcript variant X1, mRNA	30.5	-1.64	4.2e-05
XM_028866846.2	7621	Myo18a	myosin XVIIIA (Myo18a), transcript variant X17, mRNA	0.14	-7.79	4.2e-05
XM_028892331.2	2318	Tnfrsf1a	TNF receptor superfamily member 1A (Tnfrsf1a), mRNA	50.28	1.38	4.3e-05
XM_028874576.2	1905	Mettl7a	methyltransferase like 7A (Mettl7a), mRNA	10.1	-1.59	4.3e-05
XM_037197087.1	1651	LOC114705143	uncharacterized LOC114705143 (LOC114705143), mRNA	6.97	2.41	4.3e-05
XM_028895240.2	3806	Ppm1k	protein phosphatase, Mg2+/Mn2+ dependent 1K (Ppm1k), transcript variant X1, mRNA	5.63	-1.43	4.3e-05
XM_028872428.2	2851	S1pr2	sphingosine-1-phosphate receptor 2 (S1pr2), mRNA	4.62	1.95	4.3e-05
XM_028882761.2	1209	Msantd3	Myb/SANT DNA binding domain containing 3 (Msantd3), transcript variant X2, mRNA	2.46	3.02	4.3e-05
XM_028878106.2	5876	Stard13	StAR related lipid transfer domain containing 13 (Stard13), transcript variant X2, mRNA	2.11	2.09	4.3e-05
XM_037197405.1	2224	Rpap3	RNA polymerase II associated protein 3 (Rpap3), transcript variant X4, mRNA	0.5	-7.73	4.3e-05
XM_028867976.2	2870	Chp1	calcineurin like EF-hand protein 1 (Chp1), mRNA	76.6	1.28	4.4e-05
XM_028867399.2	4015	Tmed5	transmembrane p24 trafficking protein 5 (Tmed5), transcript variant X1, mRNA	32.68	1.27	4.4e-05
XM_028853858.2	2687	Traf7	TNF receptor associated factor 7 (Traf7), transcript variant X1, mRNA	20	1.19	4.4e-05
XM_028871100.2	2509	Cdc42ep1	CDC42 effector protein 1 (Cdc42ep1), transcript variant X1, mRNA	3.89	2.44	4.4e-05
XM_028867207.2	2288	B3galnt1	beta-1,3-N-acetylgalactosaminyltransferase 1 (globoside blood group) (B3galnt1), transcript variant X2, mRNA	2.44	3.9	4.4e-05
XM_028880114.2	1357	C6H4orf46	chromosome 6 C4orf46 homolog (C6H4orf46), mRNA	23.04	-1.33	4.5e-05
XM_028879067.1	2080	St3gal4	ST3 beta-galactoside alpha-2,3-sialyltransferase 4 (St3gal4), transcript variant X9, mRNA	21.74	1.58	4.5e-05
XM_028855777.2	9254	Znf831	zinc finger protein 831 (Znf831), transcript variant X2, mRNA	2.01	-3.32	4.5e-05
XM_028861006.2	2388	Scimp	SLP adaptor and CSK interacting membrane protein (LOC114686343), mRNA	42.47	1.52	4.6e-05
XM_028860050.2	1343	Ccrl2	C-C motif chemokine receptor like 2 (Ccrl2), mRNA	17.98	1.35	4.6e-05
XM_028866286.2	3090	Gramd1b	GRAM domain containing 1B (Gramd1b), transcript variant X8, mRNA	5.01	2.68	4.6e-05
XM_028860896.2	3863	Hps3	HPS3 biogenesis of lysosomal organelles complex 2 subunit 1 (Hps3), transcript variant X1, mRNA	4.27	-1.58	4.6e-05
XM_028879117.1	2669	Macir	macrophage immunometabolism regulator (Macir), transcript variant X5, mRNA	2.92	3.19	4.6e-05
XM_028888951.2	2747	Rbm39	RNA binding motif protein 39 (Rbm39), transcript variant X6, mRNA	0.59	4.78	4.6e-05
XM_028893335.2	2373	Nsg2	neuronal vesicle trafficking associated 2 (Nsg2), mRNA	61.15	-1.32	4.7e-05
XM_028853687.2	2852	Rtn3	reticulon 3 (Rtn3), transcript variant X7, mRNA	35.04	1.17	4.7e-05
XM_028864043.2	2020	Rassf4	Ras association domain family member 4 (Rassf4), transcript variant X1, mRNA	3.07	3.91	4.7e-05
XM_028872287.2	6150	Etv1	ETS variant transcription factor 1 (Etv1), transcript variant X6, mRNA	0.78	4.42	4.7e-05
XM_028877638.2	3673	Rcbtb2	RCC1 and BTB domain containing protein 2 (Rcbtb2), transcript variant X4, mRNA	0.34	-7.91	4.7e-05
XM_028870335.2	953	Ctsb	cathepsin B-like (LOC114693805), mRNA	160.81	1.33	4.8e-05
XM_028894306.2	3223	Aacs	acetoacetyl-CoA synthetase (Aacs), mRNA	35.88	1.46	4.8e-05
XM_028870923.2	3421	Parp10	poly(ADP-ribose) polymerase family member 10 (Parp10), transcript variant X1, mRNA	23	1.13	4.8e-05
XM_028879084.2	5611	St8sia4	ST8 alpha-N-acetyl-neuraminide alpha-2,8-sialyltransferase 4 (St8sia4), mRNA	18.91	-1.07	4.8e-05
XM_037199474.1	1896	B3galt4	beta-1,3-galactosyltransferase 4 (B3galt4), mRNA	13.01	1.48	4.8e-05
XM_028887297.2	6832	Dock11	dedicator of cytokinesis 11 (Dock11), transcript variant X2, mRNA	14.37	-1.21	4.9e-05
XM_028885421.2	6490	Ago4	protein argonaute-4 (LOC114704270), mRNA	9.8	1.24	4.9e-05
XR_005089680.1	2029	LOC119086395	uncharacterized LOC119086395 (LOC119086395), ncRNA	1.72	3.12	4.9e-05
XM_028886724.2	1891	Gfra3	GDNF family receptor alpha 3 (Gfra3), mRNA	1.13	4	4.9e-05
XM_028892346.2	2347	Ptpn6	protein tyrosine phosphatase non-receptor type 6 (Ptpn6), transcript variant X2, mRNA	209.02	1.3	5e-05
XM_028858722.2	2723	Slc2a6	solute carrier family 2 member 6 (Slc2a6), transcript variant X1, mRNA	31.03	1.97	5e-05
XM_028878256.2	4214	Cog3	component of oligomeric golgi complex 3 (Cog3), mRNA	12.07	1.17	5e-05
XM_037202608.1	4426	Fkbp15	FKBP prolyl isomerase family member 15 (Fkbp15), transcript variant X2, mRNA	11.65	1.2	5e-05
XM_028863009.2	4333	Znf182	zinc finger protein 182 (Znf182), transcript variant X5, mRNA	0.22	-7.57	5e-05
XM_028876516.1	4656	Slc41a1	solute carrier family 41 member 1 (Slc41a1), mRNA	18.49	1.09	5.1e-05
XM_037202072.1	2717	Gramd1a	GRAM domain containing 1A (Gramd1a), transcript variant X4, mRNA	11.53	1.54	5.1e-05
XM_028871859.2	5022	Mtss1	MTSS I-BAR domain containing 1 (Mtss1), transcript variant X8, mRNA	6.57	-1.53	5.1e-05
XM_028854505.2	2165	Mfsd2a	major facilitator superfamily domain containing 2A (Mfsd2a), transcript variant X1, mRNA	0.33	8.01	5.1e-05
XM_028861835.1	4353	Pcdhb18	protocadherin beta-18-like (LOC114687136), mRNA	0.19	3.87	5.1e-05
XM_028873050.2	6970	Osbpl8	oxysterol binding protein like 8 (Osbpl8), transcript variant X6, mRNA	3.2	1.87	5.2e-05
XR_005090318.1	1551	LOC119086920	uncharacterized LOC119086920 (LOC119086920), ncRNA	5.58	2.25	5.3e-05
XM_028864322.2	984	Il12b	interleukin 12B (Il12b), mRNA	0.89	6.42	5.3e-05
XR_005089798.1	636	LOC119086500	uncharacterized LOC119086500 (LOC119086500), ncRNA	0.54	6.21	5.3e-05
XM_028861559.2	1933	Trim30a	tripartite motif-containing protein 30A-like (LOC119086094), transcript variant X1, mRNA	47.25	1.28	5.4e-05
XM_028860794.2	1302	Cited2	Cbp/p300 interacting transactivator with Glu/Asp rich carboxy-terminal domain 2 (Cited2), mRNA	36.86	1.43	5.4e-05
XM_028879887.2	4230	Sbk1	SH3 domain binding kinase 1 (Sbk1), transcript variant X1, mRNA	13.93	-1.34	5.4e-05
XM_037198350.1	1489	Pilrb2	paired immunoglobulin-like type 2 receptor beta-2 (LOC114688352), transcript variant X2, mRNA	10.19	2.38	5.5e-05
XR_005089822.1	1814	Pilrb2	paired immunoglobulin-like type 2 receptor beta-2 (LOC114688352), transcript variant X3, misc_RNA	36.89	1.54	5.6e-05
XM_028865683.2	5586	Inpp4a	inositol polyphosphate-4-phosphatase type I A (Inpp4a), transcript variant X13, mRNA	0.12	8.95	5.6e-05
XM_028866914.2	2504	Wsb1	WD repeat and SOCS box containing 1 (Wsb1), transcript variant X1, mRNA	24.48	1.22	5.7e-05
XM_028864213.2	1528	Gsdme	gasdermin-E-like (LOC114689783), mRNA	0.28	4.93	5.7e-05
XM_028867429.2	4480	Gak	cyclin G associated kinase (Gak), transcript variant X5, mRNA	0.12	7.31	5.7e-05
XM_028884166.2	1954	Ctsb	cathepsin B (LOC114703364), mRNA	269.19	1.4	5.8e-05
XM_037200604.1	2698	Mefv	MEFV innate immuity regulator, pyrin (Mefv), transcript variant X1, mRNA	2.03	3.02	5.8e-05
XM_028865279.2	2068	Map2k6	mitogen-activated protein kinase kinase 6 (Map2k6), transcript variant X2, mRNA	0.21	8.21	5.8e-05
XM_028866841.1	7348	Myo18a	myosin XVIIIA (Myo18a), transcript variant X18, mRNA	0.07	8.78	5.9e-05
XM_037210274.1	2740	Cxcr2	C-X-C chemokine receptor type 2 (LOC114709324), transcript variant X2, mRNA	7.78	2.25	6.1e-05
XM_028875813.2	7069	Tnik	TRAF2 and NCK interacting kinase (Tnik), mRNA	6.05	-1.23	6.1e-05
XM_028885809.2	7032	Pitpnm2	phosphatidylinositol transfer protein membrane associated 2 (Pitpnm2), transcript variant X1, mRNA	0.07	8.99	6.1e-05
XM_028855439.2	4696	Stat2	signal transducer and activator of transcription 2 (Stat2), mRNA	52.54	1.25	6.4e-05
XM_028895287.2	2038	Rassf1	Ras association domain family member 1 (Rassf1), transcript variant X1, mRNA	9.18	-1.88	6.4e-05
XM_028874893.2	1139	Ostf1	osteoclast stimulating factor 1 (Ostf1), mRNA	195.62	1.33	6.5e-05
XM_028882800.2	3641	Tdrd7	tudor domain containing 7 (Tdrd7), mRNA	13.69	1.2	6.5e-05
XM_037196704.1	4164	Mbd6	methyl-CpG binding domain protein 6 (Mbd6), transcript variant X3, mRNA	5.98	1.39	6.5e-05
XM_028858641.2	4367	Zswim4	zinc finger SWIM-type containing 4 (Zswim4), mRNA	5.96	1.48	6.5e-05
XM_028855369.2	2093	Gbp1	guanylate-binding protein 1-like (LOC114681711), transcript variant X2, mRNA	4.12	2.4	6.5e-05
XM_028893740.2	3177	Mboat2	membrane bound O-acyltransferase domain containing 2 (Mboat2), transcript variant X1, mRNA	3.96	2.75	6.5e-05
XM_028880923.2	6924	Ncapg2	non-SMC condensin II complex subunit G2 (Ncapg2), transcript variant X2, mRNA	1.86	1.71	6.5e-05
XM_037201214.1	944	LOC114686457	protein RoBo-1-like (LOC114686457), transcript variant X3, mRNA	22.63	3.26	6.6e-05
XM_028867321.2	2567	Gbp6	guanylate-binding protein 6-like (LOC114691793), transcript variant X5, mRNA	3.15	2.77	6.6e-05
XM_028888056.2	1202	H2-Ea	H-2 class II histocompatibility antigen, E-K alpha chain (LOC114705896), mRNA	532.77	-1.38	6.7e-05
XM_028874471.2	994	Prr13	proline rich 13 (Prr13), transcript variant X3, mRNA	33.47	1.34	6.7e-05
XM_028859420.2	4517	Eif2ak3	eukaryotic translation initiation factor 2 alpha kinase 3 (Eif2ak3), mRNA	19.84	-1.06	6.7e-05
XM_037201656.1	5322	Ciita	class II major histocompatibility complex transactivator (Ciita), transcript variant X6, mRNA	4.39	-1.74	6.7e-05
XM_037207143.1	2568	Gbp1	guanylate-binding protein 1-like (LOC114681710), transcript variant X1, mRNA	3.2	2.86	6.7e-05
XM_037205213.1	2171	Slc20a1	solute carrier family 20 member 1 (Slc20a1), transcript variant X2, mRNA	18.55	1.19	6.8e-05
XR_005093022.1	1489	Phlda3	pleckstrin homology like domain family A member 3 (Phlda3), transcript variant X1, misc_RNA	4.23	-3.03	6.8e-05
XM_028863405.1	1921	Macroh2a1	core histone macro-H2A.1 (LOC114688930), transcript variant X3, mRNA	42.77	1.22	6.9e-05
XM_028877523.2	6932	Pgm2l1	phosphoglucomutase 2 like 1 (Pgm2l1), mRNA	3.26	-1.36	6.9e-05
XM_028853944.2	1754	Or1f19	olfactory receptor 1361-like (LOC114680783), mRNA	0.18	5.03	6.9e-05
XM_028878464.2	2912	Atxn7l1	ataxin 7 like 1 (Atxn7l1), transcript variant X10, mRNA	0.15	8.11	6.9e-05
XM_028890569.2	4336	Synrg	synergin gamma (Synrg), transcript variant X4, mRNA	0.1	8.79	6.9e-05
XM_028856869.2	1092	Ifi35	interferon induced protein 35 (Ifi35), mRNA	107.84	1.25	7e-05
XM_028863329.2	971	LOC114688824	leukocyte immunoglobulin-like receptor subfamily A member 5 (LOC114688824), mRNA	5.46	-4.39	7e-05
XM_028876076.2	2009	Max	MYC associated factor X (Max), transcript variant X2, mRNA	105.83	1.45	7.1e-05
XM_028884499.2	2100	Snap25	synaptosome associated protein 25 (Snap25), transcript variant X1, mRNA	0.69	-8.26	7.2e-05
XM_028868174.1	3135	Retreg1	reticulophagy regulator 1 (Retreg1), transcript variant X1, mRNA	11.81	-1.16	7.3e-05
XM_028866774.2	2170	Rph3al	rabphilin 3A like (without C2 domains) (Rph3al), transcript variant X4, mRNA	0.33	-5.11	7.3e-05
XM_037211645.1	4408	Dennd2b	DENN domain containing 2B (Dennd2b), transcript variant X11, mRNA	0.28	-7.89	7.3e-05
XM_028874738.2	2861	Prg4	proteoglycan 4 (Prg4), transcript variant X3, mRNA	108.58	3.92	7.5e-05
XM_028878190.2	2663	Epx	eosinophil peroxidase (Epx), mRNA	36.23	3.13	7.5e-05
XM_028894395.2	3587	Ywhag	tyrosine 3-monooxygenase/tryptophan 5-monooxygenase activation protein gamma (Ywhag), mRNA	27.02	1.18	7.5e-05
XM_028894446.2	2582	Sh2b2	SH2B adaptor protein 2 (Sh2b2), transcript variant X4, mRNA	4.77	2.42	7.5e-05
XM_028878462.2	6121	Atxn7l1	ataxin 7 like 1 (Atxn7l1), transcript variant X4, mRNA	4.45	-1.4	7.5e-05
XM_028869438.2	6749	Kdm6b	lysine demethylase 6B (Kdm6b), transcript variant X3, mRNA	4.41	2.94	7.5e-05
XM_028866905.2	1490	Lgals9	galectin 9 (Lgals9), transcript variant X2, mRNA	29.66	1.61	7.6e-05
XM_028858080.2	3015	Wars1	tryptophanyl-tRNA synthetase 1 (Wars1), transcript variant X2, mRNA	2.45	3.05	7.7e-05
XM_028865056.2	3687	Ptpn9	protein tyrosine phosphatase non-receptor type 9 (Ptpn9), mRNA	8.81	1.18	7.8e-05
XM_028883318.2	8296	Setx	senataxin (Setx), transcript variant X4, mRNA	6.16	-1.21	7.8e-05
XM_028887885.2	2971	Ppt2	palmitoyl-protein thioesterase 2 (Ppt2), transcript variant X1, mRNA	1.66	-2.53	7.8e-05
XM_028863610.2	1278	LOC114689241	C-type lectin domain family 4 member A-like (LOC114689241), mRNA	1.46	3.34	7.8e-05
XM_028889072.1	2018	Pgap2	post-GPI attachment to proteins 2 (Pgap2), transcript variant X9, mRNA	0.21	7.85	7.8e-05
XM_037208137.1	3558	Limk2	LIM domain kinase 2 (Limk2), transcript variant X2, mRNA	1.98	4.46	8e-05
XM_037201479.1	3195	Ccdc154	coiled-coil domain containing 154 (Ccdc154), transcript variant X6, mRNA	1.18	3.61	8e-05
XM_028854705.2	3189	Ctnnb1	catenin beta 1 (Ctnnb1), transcript variant X2, mRNA	11.52	1.12	8.1e-05
XM_028874482.2	2759	Rarg	retinoic acid receptor gamma (Rarg), transcript variant X1, mRNA	0.44	-7.83	8.1e-05
XM_028857707.2	1293	Mcub	mitochondrial calcium uniporter dominant negative subunit beta (Mcub), mRNA	23.54	-1.31	8.2e-05
XM_037210673.1	9558	Zfyve26	zinc finger FYVE-type containing 26 (Zfyve26), transcript variant X1, mRNA	0.05	8.62	8.3e-05
XM_028893599.2	2224	Pgd	phosphogluconate dehydrogenase (Pgd), mRNA	231.74	1.52	8.4e-05
XM_028856533.2	878	Ly86	lymphocyte antigen 86 (Ly86), transcript variant X1, mRNA	50.96	-1.38	8.5e-05
XM_028859789.2	4859	Slc38a2	solute carrier family 38 member 2 (Slc38a2), transcript variant X1, mRNA	26.91	1.19	8.5e-05
XM_028873414.2	4580	Rasgrp3	RAS guanyl releasing protein 3 (Rasgrp3), transcript variant X2, mRNA	6.96	-1.3	8.5e-05
XR_005092983.1	4023	LOC119086168	uncharacterized LOC119086168 (LOC119086168), ncRNA	3.15	1.84	8.5e-05
XM_028856275.2	1881	Ecm1	extracellular matrix protein 1 (Ecm1), transcript variant X2, mRNA	96.81	2.59	8.6e-05
XM_028869793.2	3637	Calcr	calcitonin receptor (Calcr), transcript variant X2, mRNA	4.59	4.27	8.6e-05
XM_028876029.2	2070	Sptlc2	serine palmitoyltransferase long chain base subunit 2 (Sptlc2), mRNA	24.04	1.19	8.7e-05
XM_028858102.2	3773	Prkch	protein kinase C eta (Prkch), mRNA	23.2	-1.07	8.7e-05
XM_028859700.2	1134	Ebi3	Epstein-Barr virus induced 3 (Ebi3), mRNA	21.01	2.06	8.7e-05
XM_037208230.1	2429	Cgas	cyclic GMP-AMP synthase (Cgas), mRNA	6.32	1.42	8.7e-05
XM_028895017.2	6662	Lrrc58	leucine rich repeat containing 58 (Lrrc58), mRNA	12.08	1.28	8.8e-05
XM_037210969.1	5258	Hdac9	histone deacetylase 9 (Hdac9), transcript variant X16, mRNA	0.86	-3.52	8.8e-05
XM_028853936.2	2290	Bicdl2	BICD family like cargo adaptor 2 (Bicdl2), mRNA	0.53	3.44	8.8e-05
XM_028864037.2	2574	Alox5	arachidonate 5-lipoxygenase (Alox5), mRNA	47.99	1.6	8.9e-05
XM_028879641.2	2497	Pdia4	protein disulfide isomerase family A member 4 (Pdia4), mRNA	36.09	1.11	8.9e-05
XR_005089420.1	841	LOC119086193	uncharacterized LOC119086193 (LOC119086193), transcript variant X2, ncRNA	5.03	-2.68	8.9e-05
XM_028893872.2	2190	Relb	RELB proto-oncogene, NF-kB subunit (Relb), transcript variant X2, mRNA	3.36	2.73	8.9e-05
XM_028873508.2	15771	Birc6	baculoviral IAP repeat containing 6 (Birc6), transcript variant X4, mRNA	0.09	6.18	9e-05
XM_037204733.1	1057	Il36b	interleukin 36 beta (Il36b), transcript variant X1, mRNA	0.97	4.77	9.2e-05
XM_028871552.2	4084	Ccl17	C-C motif chemokine ligand 17 (Ccl17), mRNA	0.28	4.87	9.2e-05
XM_028885548.1	2490	Maz	MYC associated zinc finger protein (Maz), transcript variant X4, mRNA	0.26	8.29	9.2e-05
XM_028873437.2	3691	Picalm	phosphatidylinositol binding clathrin assembly protein (Picalm), transcript variant X15, mRNA	7.04	2.7	9.3e-05
XM_028859097.1	1709	Ifit1	interferon-induced protein with tetratricopeptide repeats 1-like (LOC114684565), mRNA	3	2.55	9.3e-05
XM_028877180.2	1103	Rbpms	RNA binding protein, mRNA processing factor (Rbpms), transcript variant X1, mRNA	0.51	7.82	9.3e-05
XM_028894899.2	4204	Lcp2	lymphocyte cytosolic protein 2 (Lcp2), transcript variant X1, mRNA	41.46	1.19	9.4e-05
XM_037209491.1	4281	Iqgap2	IQ motif containing GTPase activating protein 2 (Iqgap2), transcript variant X4, mRNA	0.27	8.34	9.4e-05
XM_037201616.1	3164	Rara	retinoic acid receptor alpha (Rara), transcript variant X3, mRNA	24.7	2.07	9.5e-05
XM_028866915.2	2065	Wsb1	WD repeat and SOCS box containing 1 (Wsb1), transcript variant X3, mRNA	10.72	1.45	9.5e-05
XM_028874400.2	4346	Itga5	integrin subunit alpha 5 (Itga5), mRNA	33.81	1.3	9.7e-05
XM_028872276.2	1638	Ifrd1	interferon related developmental regulator 1 (Ifrd1), transcript variant X2, mRNA	9.51	1.56	9.7e-05
XM_037200887.1	1396	LOC114681228	mastin-like (LOC114681228), transcript variant X2, mRNA	5.33	3.36	9.7e-05
XM_028881521.2	2267	Tulp3	TUB like protein 3 (Tulp3), transcript variant X2, mRNA	0.18	7.4	9.7e-05
XR_005090397.1	2337	LOC119086975	uncharacterized LOC119086975 (LOC119086975), ncRNA	7.11	1.98	9.8e-05
XM_037197682.1	7293	Cacna1i	calcium voltage-gated channel subunit alpha1 I (Cacna1i), transcript variant X2, mRNA	0.14	4.09	9.8e-05
XM_028862533.2	3330	Slc25a23	solute carrier family 25 member 23 (Slc25a23), transcript variant X1, mRNA	9.76	-1.45	9.9e-05
XM_028862784.2	1509	Tle5	TLE family member 5, transcriptional modulator (Tle5), transcript variant X1, mRNA	77.89	-1.1	0.0001
XM_037210462.1	2868	Mvp	major vault protein (LOC114704354), transcript variant X2, mRNA	66.76	1.25	0.0001
XM_028856428.2	1073	Gng10	G protein subunit gamma 10 (Gng10), transcript variant X2, mRNA	25.99	1.57	0.0001
XM_028889718.2	3571	Rhbdf2	rhomboid 5 homolog 2 (Rhbdf2), mRNA	21.31	1.27	0.0001
XM_037211673.1	381	Eif4ebp1	eukaryotic translation initiation factor 4E binding protein 1 (Eif4ebp1), mRNA	18.26	2.18	0.0001
XM_037207457.1	2325	Pkm	pyruvate kinase M1/2 (Pkm), transcript variant X4, mRNA	14.02	1.57	0.0001
XM_028874844.2	10473	Rev3l	REV3 like, DNA directed polymerase zeta catalytic subunit (Rev3l), mRNA	5.8	-1.15	0.0001
XM_028886268.2	2750	B4galnt1	beta-1,4-N-acetyl-galactosaminyltransferase 1 (B4galnt1), transcript variant X2, mRNA	5.57	1.82	0.0001
XR_005090107.1	1860	LOC119086754	uncharacterized LOC119086754 (LOC119086754), ncRNA	5.32	1.94	0.0001
XM_028856205.2	1693	Cidea	cell death inducing DFFA like effector a (Cidea), mRNA	5.1	2.87	0.0001
XM_028869626.2	6042	Dyrk2	dual specificity tyrosine phosphorylation regulated kinase 2 (Dyrk2), transcript variant X1, mRNA	4.54	-1.34	0.0001
XM_028865793.2	5059	Il1r1	interleukin 1 receptor type 1 (Il1r1), transcript variant X1, mRNA	2.94	3.91	0.0001
XM_028877376.1	9723	Lama2	laminin subunit alpha 2 (Lama2), transcript variant X7, mRNA	0.13	-8.08	0.0001
XM_028890489.2	4921	Lars2	leucyl-tRNA synthetase 2, mitochondrial (Lars2), transcript variant X5, mRNA	0.13	7.98	0.0001
XM_028870930.2	4293	Oplah	5-oxoprolinase, ATP-hydrolysing (Oplah), transcript variant X4, mRNA	0.12	7.88	0.0001
XM_028855593.2	6193	Epb41l1	erythrocyte membrane protein band 4.1 like 1 (Epb41l1), transcript variant X12, mRNA	0.08	7.65	0.0001
XM_028862833.2	3078	Adgre5	adhesion G protein-coupled receptor E5 (Adgre5), transcript variant X2, mRNA	260.87	1.38	0.00011
XM_028874470.2	995	Prr13	proline rich 13 (Prr13), transcript variant X2, mRNA	57.37	1.23	0.00011
XM_037200802.1	2714	LOC114707032	CMRF35-like molecule 3 (LOC114707032), transcript variant X1, mRNA	30.69	-1.28	0.00011
XM_037202194.1	1778	Lilra5	leukocyte immunoglobulin-like receptor subfamily A member 5 (LOC114689302), mRNA	18.89	-1.96	0.00011
XM_028885884.2	1467	P2rx4	purinergic receptor P2X 4 (P2rx4), transcript variant X1, mRNA	17.06	-1.26	0.00011
XM_028870164.2	2317	Gusb	glucuronidase beta (Gusb), transcript variant X1, mRNA	13.45	-1.29	0.00011
XM_028877509.2	7341	Arrb1	arrestin beta 1 (Arrb1), transcript variant X7, mRNA	7.58	-1.4	0.00011
XR_005092480.1	513	LOC119088760	uncharacterized LOC119088760 (LOC119088760), ncRNA	6.48	2.61	0.00011
XM_028860852.2	2703	Tec	tec protein tyrosine kinase (Tec), transcript variant X2, mRNA	4.59	1.92	0.00011
XM_028875081.2	2556	Acsl5	acyl-CoA synthetase long chain family member 5 (Acsl5), transcript variant X1, mRNA	2.76	4.58	0.00011
XM_037202666.1	4410	Tlr4	toll like receptor 4 (Tlr4), transcript variant X1, mRNA	2.76	2.55	0.00011
XM_028884144.2	8792	Kif13b	kinesin family member 13B (Kif13b), transcript variant X2, mRNA	1.6	2.32	0.00011
XR_005091032.1	2125	LOC119087574	uncharacterized LOC119087574 (LOC119087574), ncRNA	1.03	-3.51	0.00011
XR_005091575.1	2217	LOC114682596	uncharacterized LOC114682596 (LOC114682596), ncRNA	0.63	4.27	0.00011
XM_037200350.1	1910	Tcp1	t-complex 1 (Tcp1), transcript variant X2, mRNA	0.44	8.51	0.00011
XM_037206240.1	4092	Cdh3	cadherin 3 (Cdh3), transcript variant X1, mRNA	0.35	3.89	0.00011
XM_037198673.1	5476	Naa25	N-alpha-acetyltransferase 25, NatB auxiliary subunit (Naa25), transcript variant X2, mRNA	0.1	8.67	0.00011
XM_028893272.2	5150	Rrbp1	ribosome binding protein 1 (Rrbp1), mRNA	37.26	1.44	0.00012
XM_037210271.1	2134	Slc11a1	solute carrier family 11 member 1 (Slc11a1), transcript variant X2, mRNA	7.93	2.05	0.00012
XM_028889604.2	4942	Thra	thyroid hormone receptor alpha (Thra), mRNA	6.87	-1.17	0.00012
XM_037203605.1	2417	Ezh2	enhancer of zeste 2 polycomb repressive complex 2 subunit (Ezh2), transcript variant X9, mRNA	6.28	1.55	0.00012
XM_028861092.2	6988	Stxbp5	syntaxin binding protein 5 (Stxbp5), transcript variant X1, mRNA	1.98	2.13	0.00012
XM_037201190.1	660	LOC114702196	peptidyl-prolyl cis-trans isomerase A-like (LOC114702196), mRNA	1.1	3.5	0.00012
XM_028873738.2	3850	Sema4b	semaphorin 4B (Sema4b), transcript variant X4, mRNA	0.51	-4.35	0.00012
XR_003735476.2	98	LOC114699149	uncharacterized LOC114699149 (LOC114699149), transcript variant X1, ncRNA	307.24	2.82	0.00013
XM_028891273.2	2114	Tkt	transketolase (Tkt), transcript variant X1, mRNA	220.21	1.38	0.00013
XM_028872537.2	1493	Acp5	acid phosphatase 5, tartrate resistant (Acp5), transcript variant X1, mRNA	67.67	-1.23	0.00013
XM_028866304.2	10758	Sorl1	sortilin related receptor 1 (Sorl1), transcript variant X1, mRNA	48.48	-1.27	0.00013
XM_028869325.2	6272	Chd3	chromodomain helicase DNA binding protein 3 (Chd3), mRNA	36.98	-1.17	0.00013
XM_028871500.2	3578	Lpcat2	lysophosphatidylcholine acyltransferase 2 (Lpcat2), transcript variant X2, mRNA	32.99	1.39	0.00013
XM_028873056.2	6635	Osbpl8	oxysterol binding protein like 8 (Osbpl8), transcript variant X12, mRNA	4.75	1.83	0.00013
XM_028888016.2	2760	C2	complement C2 (C2), mRNA	3.59	2.28	0.00013
XM_028891105.2	1644	Mlkl	mixed lineage kinase domain-like protein (LOC114708095), transcript variant X2, mRNA	3.56	2.66	0.00013
XM_037204448.1	2240	Catsper2	cation channel sperm associated 2 (Catsper2), mRNA	2.43	2.3	0.00013
XM_028862995.2	1670	Iigp1	interferon-inducible GTPase 1-like (LOC114688413), mRNA	2.12	3.17	0.00013
XM_028887490.2	2865	Ccm2l	CCM2 like scaffold protein (Ccm2l), transcript variant X1, mRNA	0.34	3.87	0.00013
XM_037203198.1	2491	Slc2a5	solute carrier family 2 member 5 (Slc2a5), transcript variant X4, mRNA	0.22	7.67	0.00013
XM_028872567.2	6220	Tbx20	T-box transcription factor 20 (Tbx20), transcript variant X1, mRNA	0.2	-7.95	0.00013
XM_028883133.2	6554	Pxdn	peroxidasin (Pxdn), transcript variant X1, mRNA	0.18	-7.68	0.00013
XM_028877974.2	2668	Rab21	RAB21, member RAS oncogene family (Rab21), mRNA	27.63	1.03	0.00014
XM_028868319.2	2139	Rnf146	ring finger protein 146 (Rnf146), transcript variant X1, mRNA	23.2	1.1	0.00014
XM_028877554.2	2365	P2ry2	purinergic receptor P2Y2 (P2ry2), transcript variant X2, mRNA	13.32	1.77	0.00014
XM_028872006.1	1899	Slc66a2	solute carrier family 66 member 2 (Slc66a2), transcript variant X4, mRNA	12.74	2.56	0.00014
XM_028862782.1	3348	Gna11	G protein subunit alpha 11 (Gna11), mRNA	11.85	1.11	0.00014
XM_037201615.1	2407	Wsb1	WD repeat and SOCS box containing 1 (Wsb1), transcript variant X2, mRNA	10.87	1.4	0.00014
XM_028861562.2	1733	Trim30a	tripartite motif-containing protein 30A (LOC114686891), transcript variant X3, mRNA	9.39	1.46	0.00014
XM_028879382.2	6565	Sort1	sortilin 1 (Sort1), transcript variant X4, mRNA	7.31	1.53	0.00014
XM_028890547.2	772	Ccl4	C-C motif chemokine 4-like (LOC114707726), transcript variant X2, mRNA	6.58	3.39	0.00014
XR_003734936.2	1854	Eed	embryonic ectoderm development (Eed), transcript variant X2, misc_RNA	6.56	1.52	0.00014
XM_028873111.2	7648	Maml2	mastermind like transcriptional coactivator 2 (Maml2), mRNA	6.35	1.25	0.00014
XM_028861864.2	6954	Prr12	proline rich 12 (Prr12), mRNA	6.33	-1.27	0.00014
XM_028865263.2	2802	Fam20a	FAM20A golgi associated secretory pathway pseudokinase (Fam20a), mRNA	3.27	3.04	0.00014
XM_028865795.2	5012	Il1r1	interleukin 1 receptor type 1 (Il1r1), transcript variant X5, mRNA	0.85	5.17	0.00014
XM_028863651.2	916	LOC114689301	granzyme C-like (LOC114689301), mRNA	0.4	4.25	0.00014
XM_037210421.1	5054	Slc39a10	solute carrier family 39 member 10 (Slc39a10), transcript variant X5, mRNA	0.32	-8.14	0.00014
XM_028889583.2	3622	Gpbp1l1	GC-rich promoter binding protein 1 like 1 (Gpbp1l1), transcript variant X1, mRNA	0.31	5.5	0.00014
XM_028867086.2	3972	Sap130	Sin3A associated protein 130 (Sap130), transcript variant X2, mRNA	0.28	-7.91	0.00014
XM_028868230.2	4754	Farp1	FERM, ARH/RhoGEF and pleckstrin domain protein 1 (Farp1), transcript variant X2, mRNA	0.25	-7.84	0.00014
XM_037205262.1	2027	Bfsp1	beaded filament structural protein 1 (Bfsp1), transcript variant X3, mRNA	0.25	8.33	0.00014
XM_037199762.1	3176	Plekha4	pleckstrin homology domain containing A4 (Plekha4), transcript variant X1, mRNA	0.21	7.86	0.00014
XM_028887957.2	1548	LOC114705846	H-2 class I histocompatibility antigen, L-D alpha chain-like (LOC114705846), transcript variant X1, mRNA	476.82	1.26	0.00015
XM_028888176.2	3106	Rps6ka1	ribosomal protein S6 kinase A1 (Rps6ka1), transcript variant X3, mRNA	43.6	1.24	0.00015
XM_028887382.2	4632	Ttyh3	tweety family member 3 (Ttyh3), transcript variant X2, mRNA	25.89	-1.09	0.00015
XM_028891146.2	2225	Ldb1	LIM domain binding 1 (Ldb1), transcript variant X1, mRNA	22.57	-1.12	0.00015
XM_028890900.2	5876	Adar	adenosine deaminase RNA specific (Adar), transcript variant X2, mRNA	19.8	1.14	0.00015
XM_028858613.2	9956	Nin	ninein (Nin), mRNA	15.4	1.41	0.00015
XM_028858622.2	5819	Rfx1	regulatory factor X1 (Rfx1), mRNA	11.13	-1.25	0.00015
XM_028895257.2	4886	Herc3	HECT and RLD domain containing E3 ubiquitin protein ligase 3 (Herc3), transcript variant X1, mRNA	10.28	-1.04	0.00015
XM_028859213.2	1713	Dbp	D-box binding PAR bZIP transcription factor (LOC114684680), mRNA	9.23	-1.75	0.00015
XM_037204817.1	5621	Cd302	CD302 antigen (LOC114692807), transcript variant X1, mRNA	8.26	1.28	0.00015
XR_005089573.1	394	LOC119086325	uncharacterized LOC119086325 (LOC119086325), ncRNA	7.15	-2.93	0.00015
XM_028862961.2	1643	Tbxa2r	thromboxane A2 receptor (Tbxa2r), mRNA	6.88	-1.72	0.00015
XM_028893435.2	4063	Pygb	glycogen phosphorylase B (Pygb), mRNA	6.45	-1.4	0.00015
XM_028876120.2	1712	Gstz1	glutathione S-transferase zeta 1 (Gstz1), transcript variant X2, mRNA	5.63	2.44	0.00015
XM_037205918.1	6178	Gpr141	G protein-coupled receptor 141 (Gpr141), transcript variant X4, mRNA	4.8	1.8	0.00015
XM_028877253.2	3099	Slc16a9	solute carrier family 16 member 9 (Slc16a9), mRNA	4.5	3.57	0.00015
XM_028867755.2	8803	Hivep1	HIVEP zinc finger 1 (Hivep1), transcript variant X1, mRNA	3.71	1.21	0.00015
XM_028892913.2	2590	C5H4orf51	chromosome 5 C4orf51 homolog (C5H4orf51), mRNA	2.7	2.11	0.00015
XM_028888431.2	5894	Anks1a	ankyrin repeat and sterile alpha motif domain containing 1A (Anks1a), transcript variant X2, mRNA	2.38	1.65	0.00015
XR_005090806.1	1786	LOC119087385	uncharacterized LOC119087385 (LOC119087385), ncRNA	1.81	2.84	0.00015
XM_028858535.2	2288	Prss57	serine protease 57 (Prss57), mRNA	1.8	2.44	0.00015
XM_028887820.2	1569	Ido1	indoleamine 2,3-dioxygenase 1 (Ido1), transcript variant X1, mRNA	0.65	4.62	0.00015
XM_037209185.1	1437	Anxa3	annexin A3 (Anxa3), transcript variant X2, mRNA	0.6	8.25	0.00015
XM_028857912.2	1891	LOC114683592	insulin-like growth factor 2 mRNA-binding protein 2 (LOC114683592), mRNA	0.55	3.65	0.00015
XM_028866629.2	1715	Unc93a	unc-93 homolog A (Unc93a), transcript variant X1, mRNA	0.4	8.04	0.00015
XM_028892781.2	1579	Mlkl	mixed lineage kinase domain-like protein (LOC114709118), transcript variant X2, mRNA	0.39	8.21	0.00015
XM_037201737.1	2286	LOC114687825	insulin-like growth factor 2 mRNA-binding protein 2 (LOC114687825), transcript variant X1, mRNA	0.29	4.84	0.00015
XM_028873425.2	3841	Picalm	phosphatidylinositol binding clathrin assembly protein (Picalm), transcript variant X4, mRNA	0.2	8.12	0.00015
XM_028891655.2	4925	Ppfibp1	PPFIA binding protein 1 (Ppfibp1), transcript variant X7, mRNA	0.18	5.95	0.00015
XM_037200344.1	6117	Ttll2	tubulin tyrosine ligase like 2 (Ttll2), transcript variant X1, mRNA	0.14	8.34	0.00015
XM_037211397.1	2263	Mybph	myosin binding protein H (Mybph), mRNA	0.12	4.53	0.00015
XM_028878732.2	939	B2m	beta-2-microglobulin (B2m), mRNA	780.4	1.23	0.00016
XM_037201835.1	3770	Lilrb3a	leukocyte immunoglobulin-like receptor subfamily B member 3A (LOC114689236), partial mRNA	335.04	1.41	0.00016
XM_028890701.2	1877	Pla2g7	phospholipase A2 group VII (Pla2g7), mRNA	132.82	1.33	0.00016
XM_028875227.2	2046	Tra2b	transformer 2 beta homolog (Tra2b), transcript variant X1, mRNA	30.01	1.02	0.00016
XM_028864120.2	5100	Znrf2	zinc and ring finger 2 (Znrf2), transcript variant X1, mRNA	19.56	-1.02	0.00016
XR_005090729.1	799	LOC114686727	uncharacterized LOC114686727 (LOC114686727), transcript variant X2, ncRNA	14.81	-2.1	0.00016
XM_028894425.2	2461	Plod3	procollagen-lysine,2-oxoglutarate 5-dioxygenase 3 (Plod3), transcript variant X2, mRNA	13.66	1.24	0.00016
XM_037206074.1	2718	Snx20	sorting nexin 20 (Snx20), transcript variant X2, mRNA	13.28	1.55	0.00016
XM_028887028.2	3241	Uba7	ubiquitin like modifier activating enzyme 7 (Uba7), transcript variant X3, mRNA	9.73	1.46	0.00016
XM_028859785.2	2994	LOC114685168	T-cell receptor-associated transmembrane adapter 1 (LOC114685168), transcript variant X2, mRNA	5.17	-1.82	0.00016
XM_028865649.2	4627	Arid5a	AT-rich interaction domain 5A (Arid5a), transcript variant X1, mRNA	3.64	1.84	0.00016
XM_037201653.1	5558	Ciita	class II major histocompatibility complex transactivator (Ciita), transcript variant X2, mRNA	2.77	-2.8	0.00016
XM_028860841.2	2289	Tmem119	transmembrane protein 119 (Tmem119), mRNA	1.75	3.05	0.00016
XM_028893072.2	2794	Ston1	stonin 1 (Ston1), transcript variant X1, mRNA	1.39	3.03	0.00016
XM_028888327.2	5777	Syngap1	synaptic Ras GTPase activating protein 1 (Syngap1), transcript variant X2, mRNA	0.37	-4.87	0.00016
XM_037207234.1	3388	Miga1	mitoguardin 1 (Miga1), transcript variant X4, mRNA	0.27	-7.42	0.00016
XM_028856570.2	8835	Cit	citron rho-interacting serine/threonine kinase (Cit), transcript variant X8, mRNA	0.05	8.27	0.00016
XM_028885692.2	739	LOC114704433	apoptosis-associated speck-like protein containing a CARD (LOC114704433), transcript variant X1, mRNA	56.23	-1.11	0.00017
XM_028861714.2	3396	Ppp1r18	protein phosphatase 1 regulatory subunit 18 (Ppp1r18), transcript variant X1, mRNA	48.25	1.16	0.00017
XM_028872901.2	3012	Snn	stannin (Snn), mRNA	38.33	-1.14	0.00017
XM_028891417.2	5441	Ski	SKI proto-oncogene (Ski), transcript variant X1, mRNA	14.37	-1.03	0.00017
XM_028876201.2	2928	Sp100	nuclear autoantigen Sp-100-like (LOC114697861), transcript variant X4, mRNA	12.39	1.37	0.00017
XM_028858309.2	3066	Cd33	myeloid cell surface antigen CD33-like (LOC114683936), transcript variant X1, mRNA	10.43	1.26	0.00017
XM_028868753.2	8083	Abca2	ATP binding cassette subfamily A member 2 (Abca2), transcript variant X1, mRNA	7.86	-1.32	0.00017
XM_028854996.2	4489	Tbc1d9b	TBC1 domain family member 9B (Tbc1d9b), transcript variant X1, mRNA	2.76	2.17	0.00017
XM_028870815.2	2125	Add1	adducin 1 (Add1), transcript variant X12, mRNA	1	-4.83	0.00017
XM_028876316.2	4844	Ttll5	tubulin tyrosine ligase like 5 (Ttll5), transcript variant X3, mRNA	0.22	-4.76	0.00017
XM_037203557.1	2594	Cd36	CD36 molecule (Cd36), transcript variant X5, mRNA	0.15	8.27	0.00017
XM_028891701.2	4785	Cdc14b	cell division cycle 14B (Cdc14b), transcript variant X3, mRNA	0.09	7.82	0.00017
XM_028874486.2	2793	Itgb7	integrin subunit beta 7 (Itgb7), transcript variant X1, mRNA	58.64	-1.21	0.00018
XM_037198349.1	1795	Pilrb2	paired immunoglobulin-like type 2 receptor beta-2 (LOC114688352), transcript variant X1, mRNA	55.5	1.59	0.00018
XM_028875082.2	2367	Acsl5	acyl-CoA synthetase long chain family member 5 (Acsl5), transcript variant X3, mRNA	24.74	1.18	0.00018
XM_028860422.2	2758	Pfkl	phosphofructokinase, liver type (Pfkl), transcript variant X1, mRNA	23.22	1.27	0.00018
XM_037211027.1	2023	Serpinb2	serpin family B member 2 (Serpinb2), transcript variant X2, mRNA	18.75	4.12	0.00018
XM_028873993.2	6481	Man2a1	mannosidase alpha class 2A member 1 (Man2a1), mRNA	18.59	-1.07	0.00018
XM_028882239.2	3696	Smim14	small integral membrane protein 14 (Smim14), transcript variant X1, mRNA	18.41	-1.06	0.00018
XM_037206075.1	2751	Snx20	sorting nexin 20 (Snx20), transcript variant X3, mRNA	10.57	1.38	0.00018
XM_028862293.2	3163	LOC114687697	junction plakoglobin (LOC114687697), transcript variant X1, mRNA	9.73	-1.76	0.00018
XM_037206700.1	10489	Fhip1a	family with sequence similarity 160 member A1 (Fam160a1), transcript variant X1, mRNA	3.09	2.95	0.00018
XM_028871885.2	8558	Fbxo32	F-box protein 32 (Fbxo32), mRNA	2.18	-1.42	0.00018
XM_028874923.2	8139	Nckap5	NCK associated protein 5 (Nckap5), mRNA	0.38	-2.85	0.00018
XM_028856860.1	1307	Lef1	lymphoid enhancer binding factor 1 (Lef1), transcript variant X2, mRNA	24.11	-1.48	0.00019
XM_028895322.2	2629	Mapkapk3	MAPK activated protein kinase 3 (Mapkapk3), transcript variant X1, mRNA	17.75	1.11	0.00019
XM_028884206.2	4182	LOC114703390	protein FAM111A-like (LOC114703390), mRNA	10.56	-1.07	0.00019
XM_028877141.2	2543	Psen1	presenilin 1 (Psen1), transcript variant X2, mRNA	8.37	1.99	0.00019
XM_028892541.2	3915	Septin9	septin 9 (Septin9), transcript variant X4, mRNA	2.28	-2.48	0.00019
XM_037204503.1	6936	Cntrl	centriolin (Cntrl), transcript variant X15, mRNA	2.06	-1.99	0.00019
XM_028892350.2	4168	Scnn1a	sodium channel epithelial 1 subunit alpha (Scnn1a), mRNA	1.36	-2.66	0.00019
XM_037211372.1	3258	Gpr25	G protein-coupled receptor 25 (Gpr25), mRNA	1.19	-2.84	0.00019
XM_028858316.2	4496	Ctu1	cytosolic thiouridylase subunit 1 (Ctu1), transcript variant X1, mRNA	0.71	2.82	0.00019
XM_037209541.1	6324	Mef2c	myocyte enhancer factor 2C (Mef2c), transcript variant X8, mRNA	0.37	-5	0.00019
XM_028877755.2	3224	Znf507	zinc finger protein 507 (Znf507), transcript variant X3, mRNA	0.33	-7.83	0.00019
XM_028863905.2	1635	Mtmr14	myotubularin related protein 14 (Mtmr14), transcript variant X5, mRNA	0.28	8.37	0.00019
XM_037202591.1	4661	Coro2a	coronin 2A (Coro2a), transcript variant X2, mRNA	0.12	7.65	0.00019
XM_028875399.2	1095	C1qb	complement C1q B chain (C1qb), mRNA	70.42	2.68	0.0002
XM_028871686.2	4486	Hmgcr	3-hydroxy-3-methylglutaryl-CoA reductase (Hmgcr), transcript variant X2, mRNA	31.66	1.16	0.0002
XM_028862954.2	4430	Pip5k1c	phosphatidylinositol-4-phosphate 5-kinase type 1 gamma (Pip5k1c), mRNA	19.79	-1	0.0002
XM_028878458.2	6421	Atxn7l1	ataxin 7 like 1 (Atxn7l1), transcript variant X2, mRNA	0.35	4.47	0.0002
XM_028881864.2	4949	Rin2	Ras and Rab interactor 2 (Rin2), transcript variant X3, mRNA	0.2	8.12	0.0002
XM_028877922.2	11741	Slc1a2	solute carrier family 1 member 2 (Slc1a2), transcript variant X2, mRNA	0.11	-8.09	0.0002
XM_037200989.1	3857	Nos2	nitric oxide synthase 2 (Nos2), mRNA	0.09	4.83	0.0002
XM_028894335.2	3252	Lyn	LYN proto-oncogene, Src family tyrosine kinase (Lyn), transcript variant X1, mRNA	73.29	1.16	0.00021
XM_028857674.2	1563	Irf2	interferon regulatory factor 2 (Irf2), transcript variant X1, mRNA	61.29	1.05	0.00021
XM_028879810.2	1293	Ralb	RAS like proto-oncogene B (Ralb), transcript variant X1, mRNA	25.68	1.29	0.00021
XM_037205919.1	1654	LOC114685833	immunoglobulin alpha-2 heavy chain-like (LOC114685833), mRNA	22.15	-1.42	0.00021
XM_028886546.2	2446	B4galt6	beta-1,4-galactosyltransferase 6 (B4galt6), transcript variant X1, mRNA	14.3	1.78	0.00021
XM_028870345.2	1586	Spryd7	SPRY domain containing 7 (Spryd7), mRNA	8.89	1.47	0.00021
XM_028887430.2	3858	Tm9sf4	transmembrane 9 superfamily member 4 (Tm9sf4), transcript variant X2, mRNA	7.73	1.39	0.00021
XM_028884969.2	3950	Tbcd	tubulin folding cofactor D (Tbcd), mRNA	7.21	-1.14	0.00021
XM_028894622.2	3967	Dennd5a	DENN domain containing 5A (Dennd5a), transcript variant X3, mRNA	6.98	2.67	0.00021
XM_037211938.1	4448	Itga7	integrin subunit alpha 7 (Itga7), transcript variant X2, mRNA	0.13	7.67	0.00021
XM_037206618.1	6950	Med12l	mediator complex subunit 12L (Med12l), transcript variant X10, mRNA	0.04	8.18	0.00021
XM_037200972.1	17143	Rnf213	ring finger protein 213 (Rnf213), mRNA	26.68	1.54	0.00022
XM_028861045.2	1587	Ginm1	glycoprotein integral membrane 1 (Ginm1), transcript variant X2, mRNA	15.3	1.76	0.00022
XM_028860387.2	5466	Fam117b	family with sequence similarity 117 member B (Fam117b), mRNA	14.47	-1.08	0.00022
XM_028875585.2	3951	Card6	caspase recruitment domain family member 6 (Card6), mRNA	12.53	1.37	0.00022
XM_028869095.2	5804	Mllt6	MLLT6, PHD finger containing (Mllt6), transcript variant X1, mRNA	8.5	1.17	0.00022
XM_037199086.1	1608	Ldha	L-lactate dehydrogenase A chain (LOC114685644), transcript variant X1, mRNA	4.09	2.51	0.00022
XM_028895329.2	2422	Parp3	poly(ADP-ribose) polymerase family member 3 (Parp3), transcript variant X3, mRNA	4.04	1.72	0.00022
XM_037210423.1	2707	Nabp1	nucleic acid binding protein 1 (Nabp1), transcript variant X4, mRNA	3.79	1.61	0.00022
XM_028864239.2	5335	Cyfip2	cytoplasmic FMR1 interacting protein 2 (Cyfip2), transcript variant X4, mRNA	47.18	-1.09	0.00023
XM_028883622.2	3002	Ckap4	cytoskeleton associated protein 4 (Ckap4), mRNA	46.72	1.48	0.00023
XM_028892648.2	3068	Tmem268	transmembrane protein 268 (Tmem268), transcript variant X1, mRNA	17.73	2.05	0.00023
XM_037205106.1	2789	LOC114697520	RAS guanyl-releasing protein 1-like (LOC114697520), mRNA	17.2	-1.45	0.00023
XM_028888887.2	1464	LOC114706494	C-type lectin domain family 4 member A-like (LOC114706494), transcript variant X1, mRNA	16.17	1.46	0.00023
XM_028880964.2	7030	Ablim1	actin binding LIM protein 1 (Ablim1), transcript variant X12, mRNA	8.89	-1.27	0.00023
XM_037198858.1	2857	Tfe3	transcription factor binding to IGHM enhancer 3 (Tfe3), transcript variant X3, mRNA	8.23	1.95	0.00023
XM_028892294.2	1280	Gapdh	glyceraldehyde-3-phosphate dehydrogenase (Gapdh), mRNA	713.72	1.19	0.00024
XM_028878765.2	1335	Oas1a	2'-5'-oligoadenylate synthase 1A-like (LOC114699623), mRNA	150.92	1.71	0.00024
XM_028893120.2	2322	Tmbim1	transmembrane BAX inhibitor motif containing 1 (Tmbim1), transcript variant X1, mRNA	42.25	1.04	0.00024
XM_028875056.2	2307	Add3	adducin 3 (Add3), transcript variant X5, mRNA	15.86	-1.33	0.00024
XM_028871046.2	2645	Cars1	cysteinyl-tRNA synthetase 1 (Cars1), transcript variant X1, mRNA	9.77	1.18	0.00024
XM_028875830.2	3517	Ampd3	adenosine monophosphate deaminase 3 (Ampd3), transcript variant X3, mRNA	5.03	1.75	0.00024
XM_028878787.2	1354	Sdsl	serine dehydratase like (Sdsl), transcript variant X1, mRNA	4.94	3.45	0.00024
XM_037205969.1	2081	Il15ra	interleukin 15 receptor subunit alpha (Il15ra), transcript variant X3, mRNA	1.66	2.37	0.00024
XM_028854818.2	3741	Rnf170	ring finger protein 170 (Rnf170), transcript variant X3, mRNA	0.25	-7.65	0.00024
XM_028879769.2	8008	Kat6b	lysine acetyltransferase 6B (Kat6b), transcript variant X2, mRNA	0.13	-7.59	0.00024
XM_037197188.1	4812	Mc2r	melanocortin 2 receptor (Mc2r), mRNA	0.13	4.97	0.00024
XM_028878459.2	6418	Atxn7l1	ataxin 7 like 1 (Atxn7l1), transcript variant X3, mRNA	0.06	7.54	0.00024
XM_028854941.2	688	Selenow	selenoprotein W (Selenow), mRNA	131.69	-1.14	0.00025
XM_028892930.2	2884	LOC114709222	F-box/LRR-repeat protein 5 (LOC114709222), mRNA	39.64	1.25	0.00025
XM_037197827.1	4544	Sbno2	strawberry notch homolog 2 (Sbno2), transcript variant X4, mRNA	19.18	4.66	0.00025
XM_028857198.2	2875	Rrm2b	ribonucleotide reductase regulatory TP53 inducible subunit M2B (Rrm2b), transcript variant X1, mRNA	7.8	-1.42	0.00025
XM_037199811.1	4941	Il18rap	interleukin 18 receptor accessory protein (LOC114690863), transcript variant X1, mRNA	6.75	2.15	0.00025
XM_028877704.2	3647	Adam17	ADAM metallopeptidase domain 17 (Adam17), transcript variant X2, mRNA	5.42	1.41	0.00025
XM_037199500.1	1317	LOC114705842	H-2 class II histocompatibility antigen, E-D beta chain-like (LOC114705842), mRNA	4.85	-2.43	0.00025
XM_028879169.2	4024	Ak5	adenylate kinase 5 (Ak5), transcript variant X1, mRNA	0.22	-7.42	0.00025
XM_028894211.2	858	Prg2	proteoglycan 2, pro eosinophil major basic protein (Prg2), mRNA	114.28	2.69	0.00026
XM_037204754.1	3059	Cd6	CD6 molecule (Cd6), mRNA	29.09	-1.4	0.00026
XM_028866222.2	3256	Calu	calumenin (Calu), transcript variant X2, mRNA	13.67	1.14	0.00026
XM_028855883.2	2924	Ehbp1l1	EH domain binding protein 1 like 1 (Ehbp1l1), transcript variant X14, mRNA	13.24	1.09	0.00026
XM_028878043.2	2930	Flt3	fms related receptor tyrosine kinase 3 (Flt3), transcript variant X2, mRNA	5.65	-1.68	0.00026
XM_028888436.2	6897	Anks1a	ankyrin repeat and sterile alpha motif domain containing 1A (Anks1a), transcript variant X6, mRNA	4.38	1.38	0.00026
XM_028882775.2	5154	Col15a1	collagen type XV alpha 1 chain (Col15a1), mRNA	2.76	1.86	0.00026
XM_028869632.1	2884	Nup107	nucleoporin 107 (Nup107), transcript variant X2, mRNA	0.16	7.83	0.00026
XM_028858602.1	2818	Pygl	glycogen phosphorylase L (Pygl), mRNA	128.73	1.26	0.00027
XM_028857892.2	5835	LOC114683572	serine/threonine-protein kinase D3-like (LOC114683572), mRNA	18.76	-0.96	0.00027
XM_028880841.2	1959	Mvd	mevalonate diphosphate decarboxylase (Mvd), mRNA	15.41	1.2	0.00027
XM_028853655.2	2614	Lrrc45	leucine rich repeat containing 45 (Lrrc45), transcript variant X1, mRNA	12	-1.15	0.00027
XM_028884443.2	6905	Itgav	integrin subunit alpha V (Itgav), transcript variant X1, mRNA	8.18	1.97	0.00027
XM_028886952.2	4165	Wdr6	WD repeat domain 6 (Wdr6), mRNA	7.81	-1.18	0.00027
XM_028882088.2	7743	Bcl11b	BAF chromatin remodeling complex subunit BCL11B (Bcl11b), transcript variant X1, mRNA	4.66	-1.66	0.00027
XM_028866921.2	11057	Nf1	neurofibromin 1 (Nf1), transcript variant X4, mRNA	0.03	8.24	0.00027
XM_028856360.2	2358	Crlf2	cytokine receptor-like factor 2 (LOC114682479), mRNA	24.48	1.19	0.00028
XM_028855610.2	2627	LOC114681853	protein NDRG3 (LOC114681853), transcript variant X3, mRNA	13.29	-1.07	0.00028
XM_028866573.2	2391	Rasl12	RAS like family 12 (Rasl12), mRNA	10.9	1.36	0.00028
XM_028889909.2	3374	Arhgef6	Rac/Cdc42 guanine nucleotide exchange factor 6 (Arhgef6), transcript variant X1, mRNA	8.51	-1.21	0.00028
XM_028885887.2	3701	P2rx7	purinergic receptor P2X 7 (P2rx7), transcript variant X2, mRNA	1.58	-2.57	0.00028
XM_037201334.1	2496	Dhx58	DExH-box helicase 58 (Dhx58), transcript variant X2, mRNA	1.29	3.3	0.00028
XM_037209720.1	8728	Bbx	BBX high mobility group box domain containing (Bbx), transcript variant X9, mRNA	0.14	-7.94	0.00028
XM_028870267.2	6661	Dock7	dedicator of cytokinesis 7 (Dock7), transcript variant X7, mRNA	0.04	7.82	0.00028
XM_028855494.2	910	Cd63	CD63 molecule (Cd63), mRNA	98.29	1.18	0.00029
XR_005090321.1	2783	LOC119086922	uncharacterized LOC119086922 (LOC119086922), ncRNA	5.64	1.43	0.00029
XM_028887045.2	5596	Col5a2	collagen type V alpha 2 chain (Col5a2), mRNA	2.19	-1.94	0.00029
XM_028882658.2	4964	Arhgap27	Rho GTPase activating protein 27 (Arhgap27), transcript variant X1, mRNA	2.15	-2.19	0.00029
XM_028858205.2	1954	Iyd	iodotyrosine deiodinase (Iyd), mRNA	0.59	-3.39	0.00029
XM_028859792.2	13343	Lyst	lysosomal trafficking regulator (Lyst), transcript variant X3, mRNA	27.43	1.47	0.0003
XM_028855106.2	1157	Sertad1	SERTA domain containing 1 (Sertad1), mRNA	16.86	1.18	0.0003
XM_037198314.1	2622	Sh2b2	SH2B adaptor protein 2 (Sh2b2), transcript variant X6, mRNA	9.36	1.9	0.0003
XM_028880823.2	2307	Slc7a5	solute carrier family 7 member 5 (Slc7a5), mRNA	8.79	1.35	0.0003
XM_037206621.1	1494	P2ry14	purinergic receptor P2Y14 (P2ry14), transcript variant X2, mRNA	0.17	7.45	0.0003
XM_028875398.2	1286	C1qc	complement C1q C chain (C1qc), mRNA	25.84	2.43	0.00031
XM_037200706.1	7496	Ikzf3	IKAROS family zinc finger 3 (Ikzf3), transcript variant X2, mRNA	7.31	-1.14	0.00031
XM_028883834.1	2743	Atp6v1b2	ATPase H+ transporting V1 subunit B2 (Atp6v1b2), mRNA	43.87	1.14	0.00032
XM_028870744.2	2312	Maea	macrophage erythroblast attacher, E3 ubiquitin ligase (Maea), transcript variant X2, mRNA	30.03	1.05	0.00032
XM_028874723.2	2881	Pla2g4a	phospholipase A2 group IVA (Pla2g4a), transcript variant X1, mRNA	21.21	1.78	0.00032
XM_028887532.2	2776	Bcl2l1	BCL2 like 1 (Bcl2l1), transcript variant X1, mRNA	14.34	1.35	0.00032
XM_028878572.2	9326	Akap11	A-kinase anchoring protein 11 (Akap11), transcript variant X3, mRNA	6.76	-1.14	0.00032
XM_028886096.2	3098	C13H2orf69	chromosome 13 C2orf69 homolog (C13H2orf69), mRNA	4.6	1.57	0.00032
XM_037204152.1	2289	LOC114706467	C-type lectin domain family 4 member A-like (LOC114706467), mRNA	2.32	1.95	0.00032
XM_037203788.1	3727	Tnip3	TNFAIP3 interacting protein 3 (Tnip3), transcript variant X1, mRNA	2.07	2.35	0.00032
XM_028876878.2	4559	Lpar3	lysophosphatidic acid receptor 3 (Lpar3), mRNA	0.2	-3.76	0.00033
XM_028882248.2	4700	Rbm47	RNA binding motif protein 47 (Rbm47), transcript variant X7, mRNA	0.14	8.01	0.00033
XM_028878664.2	1226	LOC114699570	synaptosomal-associated protein 23 (LOC114699570), transcript variant X5, mRNA	28.63	1.75	0.00034
XM_028881321.2	1416	Gata1	GATA binding protein 1 (Gata1), mRNA	10.21	1.54	0.00034
XM_028867165.2	3885	Slc39a6	solute carrier family 39 member 6 (Slc39a6), transcript variant X1, mRNA	9.63	1.9	0.00034
XM_028869842.2	1998	Asns	asparagine synthetase (glutamine-hydrolyzing) (Asns), transcript variant X1, mRNA	8.85	1.72	0.00034
XM_028872731.2	2673	Gpr27	G protein-coupled receptor 27 (Gpr27), mRNA	6.59	1.91	0.00034
XM_037204813.1	7784	Baz2b	bromodomain adjacent to zinc finger domain 2B (Baz2b), transcript variant X16, mRNA	2.91	1.29	0.00034
XM_037205689.1	1643	Slc25a48	solute carrier family 25 member 48 (Slc25a48), transcript variant X5, mRNA	0.76	5.33	0.00034
XM_028880633.1	1951	Chn1	chimerin 1 (Chn1), transcript variant X5, mRNA	0.61	-5.1	0.00034
XM_028882683.2	5119	Kansl1	KAT8 regulatory NSL complex subunit 1 (Kansl1), transcript variant X6, mRNA	0.22	-7.85	0.00034
XM_028894014.2	3002	Cast	calpastatin (Cast), transcript variant X4, mRNA	0.19	7.86	0.00034
XM_028854311.1	1463	Acd	ACD shelterin complex subunit and telomerase recruitment factor (Acd), transcript variant X2, mRNA	32.16	-0.98	0.00035
XM_028867518.2	1940	Tfg	trafficking from ER to golgi regulator (Tfg), transcript variant X1, mRNA	14	1.11	0.00035
XM_028877426.2	11938	Pcnx1	pecanex 1 (Pcnx1), transcript variant X3, mRNA	3.27	1.2	0.00035
XM_028867400.2	817	Tmed5	transmembrane p24 trafficking protein 5 (Tmed5), transcript variant X2, mRNA	1.74	3.77	0.00035
XM_028881815.2	4580	Dmd	dystrophin (Dmd), transcript variant X14, mRNA	0.16	-7.21	0.00035
XM_028854937.2	842	Ap2s1	adaptor related protein complex 2 subunit sigma 1 (Ap2s1), mRNA	91.81	1.12	0.00036
XM_028873742.1	754	Lbh	LBH regulator of WNT signaling pathway (Lbh), mRNA	53.75	-1.23	0.00036
XM_028878742.2	1724	Sqor	sulfide quinone oxidoreductase (Sqor), mRNA	46.95	1.5	0.00036
XM_028895082.2	3479	Il7r	interleukin 7 receptor (Il7r), mRNA	35.45	-1.14	0.00036
XM_028860147.1	1353	Stard3nl	STARD3 N-terminal like (Stard3nl), transcript variant X1, mRNA	19.13	1.15	0.00036
XM_037204793.1	5453	Gpd2	glycerol-3-phosphate dehydrogenase 2 (Gpd2), transcript variant X4, mRNA	5.66	1.41	0.00036
XM_028877114.2	1405	Olig2	oligodendrocyte transcription factor 2 (Olig2), mRNA	0.79	3.28	0.00036
XM_028864642.2	480	LOC114690132	60S ribosomal protein L23-like (LOC114690132), mRNA	0.72	5.81	0.00036
XM_028858149.2	946	LOC114683803	granzyme C-like (LOC114683803), mRNA	0.68	4.13	0.00036
XM_028869980.2	4050	Esyt3	extended synaptotagmin 3 (Esyt3), transcript variant X1, mRNA	0.62	-3.04	0.00036
XM_037200187.1	1006	Nrm	nurim (Nrm), transcript variant X1, mRNA	49.67	-0.94	0.00037
XM_028873986.2	3344	Rab31	RAB31, member RAS oncogene family (Rab31), mRNA	32.34	1.31	0.00037
XR_005092305.1	1754	LOC119088630	uncharacterized LOC119088630 (LOC119088630), ncRNA	5.73	2.16	0.00037
XM_037198312.1	2712	Sh2b2	SH2B adaptor protein 2 (Sh2b2), transcript variant X2, mRNA	5.4	2.6	0.00037
XM_037200506.1	2125	LOC114691311	zinc finger protein 431-like (LOC114691311), transcript variant X1, mRNA	1.49	-2.94	0.00037
XM_028859709.2	2004	Plin5	perilipin 5 (Plin5), transcript variant X2, mRNA	1.19	3.49	0.00037
XM_028874573.2	2331	Slc11a2	solute carrier family 11 member 2 (Slc11a2), transcript variant X1, mRNA	0.17	7.62	0.00037
XM_028867708.2	3145	LOC114692079	myosin regulatory light chain interacting protein (LOC114692079), transcript variant X1, mRNA	19.85	-1.17	0.00038
XM_028871684.2	5423	Cert1	ceramide transporter 1 (Cert1), transcript variant X1, mRNA	4.24	1.51	0.00038
XM_028866733.2	3540	Rtn4rl1	reticulon 4 receptor like 1 (Rtn4rl1), mRNA	2.2	-2.29	0.00038
XM_037196747.1	1278	LOC114699053	lysozyme C-2-like (LOC114699053), mRNA	2.13	-2.68	0.00038
XM_028874578.2	2293	Atf1	activating transcription factor 1 (Atf1), transcript variant X1, mRNA	23.54	1.06	0.00039
XM_028889958.2	2065	Cept1	choline/ethanolamine phosphotransferase 1 (Cept1), transcript variant X1, mRNA	14.88	1.06	0.00039
XM_028890024.2	2050	Dpysl2	dihydropyrimidinase like 2 (Dpysl2), transcript variant X2, mRNA	12.48	-1.25	0.00039
XM_037209585.1	2628	Lifr	LIF receptor subunit alpha (Lifr), mRNA	0.84	-2.86	0.00039
XM_028866294.2	7199	Gramd1b	GRAM domain containing 1B (Gramd1b), transcript variant X18, mRNA	0.07	7.48	0.00039
XM_037207758.1	8853	Amotl1	angiomotin like 1 (Amotl1), transcript variant X2, mRNA	0.03	8.05	0.0004
XM_028881312.2	2034	Ing1	inhibitor of growth family member 1 (Ing1), transcript variant X1, mRNA	20.11	-1.16	0.00041
XM_037209798.1	2976	Nrros	negative regulator of reactive oxygen species (Nrros), transcript variant X4, mRNA	15.28	1.72	0.00041
XM_037197407.1	2036	Pced1b	PC-esterase domain containing 1B (Pced1b), mRNA	14.89	-1.19	0.00041
XM_037207591.1	8186	Gramd1b	GRAM domain containing 1B (Gramd1b), transcript variant X2, mRNA	1.23	3.49	0.00041
XM_028889557.2	1657	Krt14	keratin, type I cytoskeletal 14 (LOC114706978), mRNA	0.31	5.26	0.00041
XM_028870868.2	3927	Lif	LIF interleukin 6 family cytokine (Lif), transcript variant X1, mRNA	0.21	3.2	0.00041
XM_028883751.2	3274	Mark3	microtubule affinity regulating kinase 3 (Mark3), transcript variant X2, mRNA	0.21	-7.14	0.00041
XM_037206053.1	2211	Hook2	hook microtubule tethering protein 2 (Hook2), transcript variant X4, mRNA	0.2	7.4	0.00041
XM_028880550.2	9263	Ptprg	protein tyrosine phosphatase receptor type G (Ptprg), transcript variant X1, mRNA	0.09	-7.36	0.00041
XM_028862627.2	884	Clec4d	C-type lectin domain family 4 member D (Clec4d), partial mRNA	64.54	1.22	0.00042
XM_037201157.1	1133	Arl5c	ADP ribosylation factor like GTPase 5C (Arl5c), transcript variant X1, mRNA	10.28	1.94	0.00042
XM_037209843.1	4547	LOC119088810	uncharacterized LOC119088810 (LOC119088810), mRNA	7.54	-1.62	0.00042
XM_028885423.2	7340	Ago1	protein argonaute-1 (LOC114704273), transcript variant X2, mRNA	6.97	-0.98	0.00042
XM_037206706.1	8679	Lrba	LPS responsive beige-like anchor protein (Lrba), transcript variant X2, mRNA	0.59	-4.54	0.00042
XM_028885863.2	1318	Orai1	ORAI calcium release-activated calcium modulator 1 (Orai1), transcript variant X1, mRNA	13.08	1.52	0.00043
XM_037209628.1	5275	Hlcs	holocarboxylase synthetase (Hlcs), transcript variant X3, mRNA	12.51	1.32	0.00043
XM_028856086.2	1614	Mettl17	methyltransferase like 17 (Mettl17), transcript variant X2, mRNA	11.94	-1.32	0.00043
XM_028859819.2	6783	Kbtbd11	kelch repeat and BTB domain containing 11 (Kbtbd11), transcript variant X1, mRNA	3.71	-2.54	0.00043
XM_028888047.2	4023	Dhcr24	24-dehydrocholesterol reductase (Dhcr24), mRNA	9.15	1.35	0.00044
XM_037203867.1	1541	LOC114688551	N-acetyltransferase family 8 member 2-like (LOC114688551), transcript variant X6, mRNA	7.13	1.63	0.00044
XM_028889005.2	1145	Bpifa1	BPI fold containing family A member 1 (Bpifa1), mRNA	1.85	5.22	0.00044
XM_037206739.1	2722	Cd5l	CD5 molecule like (Cd5l), mRNA	140.93	3.04	0.00045
XM_028874112.2	3878	Agfg1	ArfGAP with FG repeats 1 (Agfg1), transcript variant X9, mRNA	18.85	1.09	0.00045
XM_037199088.1	1601	LOC114685644	L-lactate dehydrogenase A chain (LOC114685644), transcript variant X2, mRNA	11.1	1.42	0.00045
XM_037209626.1	3662	Ptpre	protein tyrosine phosphatase receptor type E (Ptpre), transcript variant X3, mRNA	3.57	1.57	0.00045
XR_005091751.1	964	LOC119088158	uncharacterized LOC119088158 (LOC119088158), ncRNA	1.49	2.88	0.00045
XM_028879647.2	438	LOC114700141	histone H2B type 1-C/E/F/G/I-like (LOC114700141), mRNA	0.56	7.99	0.00045
XM_037199480.1	3563	Vwa7	von Willebrand factor A domain containing 7 (Vwa7), transcript variant X1, mRNA	0.2	-7.24	0.00045
XM_028895047.2	4486	Mfsd8	major facilitator superfamily domain containing 8 (Mfsd8), transcript variant X2, mRNA	0.17	-7.27	0.00045
XM_028877703.2	4017	Adam17	ADAM metallopeptidase domain 17 (Adam17), transcript variant X1, mRNA	40.16	1.11	0.00046
XM_028858543.2	4621	Sbno2	strawberry notch homolog 2 (Sbno2), transcript variant X1, mRNA	35.59	1.39	0.00046
XM_028864298.2	2178	Rars1	arginyl-tRNA synthetase 1 (Rars1), mRNA	20.56	1.04	0.00046
XM_028883011.2	1809	C2H9orf152	chromosome 2 C9orf152 homolog (C2H9orf152), mRNA	0.35	4.61	0.00046
XM_028892037.2	6742	Taf1	TATA-box binding protein associated factor 1 (Taf1), transcript variant X2, mRNA	0.09	6.43	0.00046
XM_037210754.1	2087	Cd19	CD19 molecule (Cd19), transcript variant X4, mRNA	24.27	-1.22	0.00047
XM_028868419.2	4681	Ttpal	alpha tocopherol transfer protein like (Ttpal), mRNA	18.55	-0.97	0.00047
XM_028884486.2	4174	Rnf19a	ring finger protein 19A, RBR E3 ubiquitin protein ligase (Rnf19a), mRNA	15.72	0.96	0.00047
XM_028854921.2	2188	Ptgir	prostaglandin I2 receptor (Ptgir), mRNA	15.15	1.41	0.00047
XM_028887269.2	3607	Tnfrsf21	TNF receptor superfamily member 21 (Tnfrsf21), mRNA	8.7	1.18	0.00047
XM_037211942.1	4000	Itga7	integrin subunit alpha 7 (Itga7), transcript variant X7, mRNA	0.34	4.47	0.00047
XM_028867700.2	10432	Atxn1	ataxin 1 (Atxn1), transcript variant X6, mRNA	0.25	-4.35	0.00047
XM_028864809.2	15103	Mycbp2	MYC binding protein 2 (Mycbp2), transcript variant X6, mRNA	0.06	-7.36	0.00047
XM_028869642.2	6689	Cpsf6	cleavage and polyadenylation specific factor 6 (Cpsf6), transcript variant X3, mRNA	0.04	7.96	0.00047
XM_028862304.2	1374	Nt5c3b	5'-nucleotidase, cytosolic IIIB (Nt5c3b), transcript variant X2, mRNA	30.67	-1.04	0.00048
XM_028875080.2	2813	Acsl5	acyl-CoA synthetase long chain family member 5 (Acsl5), transcript variant X2, mRNA	27.45	1.18	0.00048
XM_037211891.1	2002	LOC114701264	tumor protein D52-like (LOC114701264), mRNA	3.58	2.61	0.00048
XM_028893554.2	4583	Zcchc24	zinc finger CCHC-type containing 24 (Zcchc24), mRNA	2.4	-1.77	0.00048
XM_028869871.2	1585	Tfpi2	tissue factor pathway inhibitor 2 (Tfpi2), mRNA	0.56	4.44	0.00048
XM_037198825.1	5462	LOC114681372	F-box-like/WD repeat-containing protein TBL1X (LOC114681372), transcript variant X6, mRNA	0.17	-5.35	0.00048
XM_028868911.2	7484	Spag9	sperm associated antigen 9 (Spag9), transcript variant X3, mRNA	0.07	7.6	0.00048
XM_028855651.1	15459	Hectd4	HECT domain E3 ubiquitin protein ligase 4 (Hectd4), transcript variant X4, mRNA	0.01	7.84	0.00048
XM_028855400.2	1553	Suclg2	succinate-CoA ligase GDP-forming subunit beta (Suclg2), transcript variant X1, mRNA	25.38	-0.98	0.00049
XM_028887079.2	3463	Stk26	serine/threonine kinase 26 (Stk26), mRNA	12.69	-1.23	0.00049
XM_037207111.1	1788	Sgms2	sphingomyelin synthase 2 (Sgms2), transcript variant X8, mRNA	6.59	3.02	0.00049
XR_003735112.2	3754	LOC114697095	interleukin 1 receptor accessory protein (LOC114697095), transcript variant X2, misc_RNA	0.26	3.61	0.00049
XM_028878437.2	13139	Hdac9	histone deacetylase 9 (Hdac9), transcript variant X5, mRNA	0.06	-7.34	0.00049
XM_037210278.1	10186	Tns1	tensin 1 (Tns1), transcript variant X3, mRNA	0.05	7.39	0.00049
XM_037197025.1	5333	Arap1	ArfGAP with RhoGAP domain, ankyrin repeat and PH domain 1 (Arap1), transcript variant X5, mRNA	23.65	1.32	0.0005
XM_028894159.2	1931	Serping1	serpin family G member 1 (Serping1), transcript variant X1, mRNA	21.26	2.25	0.0005
XM_028875832.1	3943	Rnf141	ring finger protein 141 (Rnf141), transcript variant X3, mRNA	12.24	1.04	0.0005
XM_028871494.2	1927	Ces1f	liver carboxylesterase 1F-like (LOC114694524), transcript variant X1, mRNA	10.57	2.86	0.0005
XM_037199001.1	4134	P2ry10	P2Y receptor family member 10 (P2ry10), transcript variant X4, mRNA	10.37	-1.04	0.0005
XM_037197823.1	5083	Arid3a	AT-rich interaction domain 3A (Arid3a), transcript variant X1, mRNA	7.24	2.01	0.0005
XM_028855065.2	3328	Itpkc	inositol-trisphosphate 3-kinase C (Itpkc), mRNA	5.3	1.68	0.0005
XM_028860582.2	4097	Ccr2	C-C chemokine receptor type 2 (LOC114685946), transcript variant X4, mRNA	4.31	1.85	0.0005
XM_037207835.1	1533	Plscr2	phospholipid scramblase 2 (LOC114690952), transcript variant X1, mRNA	3	2.69	0.0005
XM_028883993.2	10938	Phf24	PHD finger protein 24 (Phf24), transcript variant X3, mRNA	0.09	-7.63	0.0005
XM_028875001.2	9067	Pcdh19	protocadherin 19 (Pcdh19), transcript variant X3, mRNA	0.04	7.28	0.0005
XM_028855288.2	3210	Cd22	CD22 molecule (Cd22), transcript variant X4, mRNA	27.24	-1.24	0.00051
XM_028860270.2	5203	Spty2d1	SPT2 chromatin protein domain containing 1 (Spty2d1), mRNA	10.75	1	0.00051
XM_028857190.2	3254	Ncald	neurocalcin delta (Ncald), mRNA	8.56	-1.33	0.00051
XR_005091816.1	1497	LOC119088206	uncharacterized LOC119088206 (LOC119088206), transcript variant X1, ncRNA	2.5	-3.29	0.00051
XM_037198727.1	5543	Clip1	CAP-Gly domain containing linker protein 1 (Clip1), transcript variant X17, mRNA	0.15	-7.29	0.00051
XM_028885648.2	3151	LOC114704405	integrin alpha-X-like (LOC114704405), mRNA	30.72	-1.19	0.00052
XM_028854393.2	7003	Mapkbp1	mitogen-activated protein kinase binding protein 1 (Mapkbp1), mRNA	2.46	-1.29	0.00052
XM_028869690.2	3100	Nubpl	nucleotide binding protein like (Nubpl), transcript variant X3, mRNA	0.12	7.45	0.00052
XM_028890086.2	1440	Cd74	CD74 molecule (Cd74), transcript variant X1, mRNA	564.89	-1.14	0.00053
XM_028895088.2	3230	Fam107b	family with sequence similarity 107 member B (Fam107b), transcript variant X1, mRNA	46.82	1.1	0.00053
XM_028865205.2	1577	Polg2	DNA polymerase gamma 2, accessory subunit (Polg2), mRNA	13.22	-1.2	0.00053
XR_005091993.1	941	C7H19orf38	chromosome 7 C19orf38 homolog (C7H19orf38), transcript variant X5, misc_RNA	4.03	2.41	0.00053
XM_037201066.1	1862	Pld3	phospholipase D family member 3 (Pld3), transcript variant X5, mRNA	1.78	4.77	0.00053
XM_028860859.2	6456	Chdh	choline dehydrogenase (Chdh), transcript variant X4, mRNA	1.55	-3.05	0.00053
XR_005091574.1	1318	LOC119088019	uncharacterized LOC119088019 (LOC119088019), ncRNA	0.36	4.05	0.00053
XM_028862383.2	854	Sri	sorcin (Sri), transcript variant X1, mRNA	126.05	1.1	0.00054
XM_037197567.1	2432	Znf623	zinc finger protein 623 (Znf623), transcript variant X1, mRNA	6.94	-1.44	0.00054
XM_028870653.2	4080	Mtmr3	myotubularin related protein 3 (Mtmr3), transcript variant X1, mRNA	0.14	7.71	0.00054
XM_028865743.2	6081	Aff3	AF4/FMR2 family member 3 (Aff3), transcript variant X1, mRNA	0.09	7.61	0.00054
XM_028868389.2	5098	Plcg1	phospholipase C gamma 1 (Plcg1), mRNA	35.59	-1.31	0.00055
XM_028889924.2	3106	Slc16a1	solute carrier family 16 member 1 (Slc16a1), mRNA	15.28	1.42	0.00055
XM_028887199.2	2641	Bysl	bystin like (Bysl), mRNA	5.84	1.39	0.00055
XM_028871464.2	7356	Nlrc5	NLR family CARD domain containing 5 (Nlrc5), transcript variant X3, mRNA	4.09	1.36	0.00055
XM_028890490.2	4528	Kif15	kinesin family member 15 (Kif15), transcript variant X1, mRNA	2.82	1.6	0.00055
XM_028868622.2	1330	Semg1	semenogelin 1 (Semg1), mRNA	2.08	-3.25	0.00055
XM_028867702.2	10327	Atxn1	ataxin 1 (Atxn1), transcript variant X8, mRNA	0.41	-2.93	0.00055
XM_028856091.2	8510	Chd8	chromodomain helicase DNA binding protein 8 (Chd8), transcript variant X1, mRNA	0.04	7.83	0.00055
XM_028858151.2	941	Gzmb	granzyme B-like (LOC114683804), mRNA	14.31	1.99	0.00056
XM_028882411.2	3590	Arhgef3	Rho guanine nucleotide exchange factor 3 (Arhgef3), transcript variant X2, mRNA	10.51	-1.57	0.00056
XM_028880812.2	4748	Fbxo31	F-box protein 31 (Fbxo31), transcript variant X2, mRNA	4.38	-1.27	0.00056
XM_037207441.1	3161	Kif23	kinesin family member 23 (Kif23), transcript variant X7, mRNA	0.14	7.19	0.00056
XM_028876143.2	3916	Susd6	sushi domain containing 6 (Susd6), transcript variant X1, mRNA	38.28	1.13	0.00057
XM_028875428.2	3161	E2f2	E2F transcription factor 2 (E2f2), transcript variant X1, mRNA	9.03	1.5	0.00057
XM_028854720.2	2997	Csrnp1	cysteine and serine rich nuclear protein 1 (Csrnp1), transcript variant X2, mRNA	6.46	2.72	0.00057
XM_028881342.2	2407	Syp	synaptophysin (LOC114701285), mRNA	4.55	-1.56	0.00057
XM_028879591.2	1233	LOC114700098	GTPase IMAP family member 7-like (LOC114700098), transcript variant X2, mRNA	4.49	-5.46	0.00057
XM_037199844.1	1162	LOC114688764	triggering receptor expressed on myeloid cells 1-like (LOC114688764), transcript variant X2, mRNA	3.99	3.48	0.00057
XR_005089794.1	851	LOC119086496	uncharacterized LOC119086496 (LOC119086496), ncRNA	1.74	-3.63	0.00057
XM_037204911.1	919	LOC114703401	oocyte-secreted protein 1-like (LOC114703401), transcript variant X4, mRNA	0.72	5.01	0.00057
XM_028874888.1	10854	Prune2	prune homolog 2 with BCH domain (Prune2), transcript variant X9, mRNA	0.04	7.35	0.00057
XM_028854718.2	7033	Nup210	nucleoporin 210 (Nup210), mRNA	42.15	-1.04	0.00058
XM_037203340.1	23963	Macf1	microtubule actin crosslinking factor 1 (Macf1), mRNA	15.38	-1.11	0.00058
XM_037200470.1	12393	Utrn	utrophin (Utrn), transcript variant X6, mRNA	8	-1.33	0.00058
XM_028893984.2	3258	Mylk3	myosin light chain kinase 3 (Mylk3), transcript variant X8, mRNA	0.24	-7.27	0.00058
XM_028871589.2	4150	Pdp1	pyruvate dehyrogenase phosphatase catalytic subunit 1 (Pdp1), transcript variant X1, mRNA	0.18	-7.08	0.00058
XM_037203255.1	5015	Plch2	phospholipase C eta 2 (Plch2), transcript variant X2, mRNA	0.12	-6.98	0.00058
XM_028893564.2	2460	Anxa11	annexin A11 (Anxa11), transcript variant X2, mRNA	15.27	1.09	0.00059
XM_037204157.1	1317	Clec4a	C-type lectin domain family 4 member A-like (LOC114706470), transcript variant X2, mRNA	4.9	2.08	0.00059
XM_037197216.1	3216	Kcng2	potassium voltage-gated channel modifier subfamily G member 2 (Kcng2), transcript variant X3, mRNA	0.09	7.4	0.00059
XM_028880487.2	8523	Erc1	ELKS/RAB6-interacting/CAST family member 1 (Erc1), transcript variant X5, mRNA	0.03	7.83	0.00059
XM_028854575.2	1129	Metrn	meteorin, glial cell differentiation regulator (Metrn), mRNA	13	-1.39	0.0006
XM_028859385.2	5201	Syne3	spectrin repeat containing nuclear envelope family member 3 (Syne3), mRNA	6.66	-1.19	0.0006
XM_028868071.2	1386	LOC114692343	glutathione S-transferase alpha-3-like (LOC114692343), transcript variant X1, mRNA	0.36	-4.51	0.0006
XM_028854892.2	3168	Strn4	striatin 4 (Strn4), transcript variant X3, mRNA	0.3	-7.39	0.0006
XM_028860839.2	1438	Selplg	selectin P ligand (Selplg), mRNA	264.65	1.35	0.00061
XM_028880033.2	2529	Anxa6	annexin A6 (Anxa6), mRNA	119.16	-1.05	0.00061
XM_028889766.2	1901	Srsf2	serine and arginine rich splicing factor 2 (Srsf2), transcript variant X1, mRNA	13.11	1.44	0.00061
XM_028883157.2	1332	Adi1	acireductone dioxygenase 1 (Adi1), mRNA	12.17	-1.28	0.00061
XM_037197831.1	3498	Midn	midnolin (Midn), transcript variant X5, mRNA	2.02	2.23	0.00061
XM_037202972.1	1689	Ptp4a2	protein tyrosine phosphatase 4A2 (Ptp4a2), transcript variant X2, mRNA	1.41	4.7	0.00061
XM_028880933.2	8390	Itgb8	integrin subunit beta 8 (Itgb8), mRNA	0.28	3.53	0.00061
XM_037200346.1	1684	Unc93a	unc-93 homolog A (Unc93a), transcript variant X2, mRNA	0.27	3.89	0.00061
XM_028883676.1	2862	Mta1	metastasis associated 1 (Mta1), transcript variant X5, mRNA	0.08	7.8	0.00061
XM_028858167.1	2391	Smpd1	sphingomyelin phosphodiesterase 1 (Smpd1), mRNA	30.08	1.17	0.00062
XM_028863796.2	3558	Syk	spleen associated tyrosine kinase (Syk), transcript variant X3, mRNA	26.04	1.49	0.00062
XM_037199035.1	9370	Slc9a7	solute carrier family 9 member A7 (Slc9a7), transcript variant X1, mRNA	4.07	-1.76	0.00062
XM_028863729.2	2334	LOC114689447	NACHT, LRR and PYD domains-containing protein 1a-like (LOC114689447), mRNA	31.37	-0.99	0.00063
XM_028856934.2	2318	Sgms2	sphingomyelin synthase 2 (Sgms2), transcript variant X2, mRNA	3.51	2.06	0.00063
XM_037201665.1	1879	Relb	RELB proto-oncogene, NF-kB subunit (Relb), transcript variant X4, mRNA	1.6	2.27	0.00063
XM_028872335.2	6927	Pcm1	pericentriolar material 1 (Pcm1), transcript variant X9, mRNA	0.13	-7.31	0.00063
XR_005090957.1	3211	LOC119087481	uncharacterized LOC119087481 (LOC119087481), ncRNA	112.89	1.25	0.00064
XM_028877876.2	2152	Rcn1	reticulocalbin 1 (Rcn1), mRNA	12.69	1.36	0.00064
XM_028879589.2	1219	LOC114700097	GTPase IMAP family member 6-like (LOC114700097), mRNA	92.83	-1.09	0.00065
XM_028873364.2	6056	Crim1	cysteine rich transmembrane BMP regulator 1 (Crim1), transcript variant X1, mRNA	3.72	-1.57	0.00065
XM_028894323.2	1318	Penk	proenkephalin (Penk), mRNA	2.57	2.41	0.00065
XM_028882072.2	3896	Bdkrb2	bradykinin receptor B2 (Bdkrb2), mRNA	0.08	5.55	0.00065
XM_028885647.2	3765	LOC114704404	integrin alpha-M (LOC114704404), mRNA	95.53	1.39	0.00066
XM_037198346.1	1634	LOC114689326	paired immunoglobulin-like type 2 receptor alpha (LOC114689326), transcript variant X1, mRNA	23.21	-1.31	0.00066
XM_037204150.1	1346	LOC114706494	C-type lectin domain family 4 member A-like (LOC114706494), transcript variant X3, mRNA	7.19	1.77	0.00066
XM_028885730.2	1872	Cflar	CASP8 and FADD like apoptosis regulator (Cflar), transcript variant X7, mRNA	2.22	2.29	0.00066
XM_028893265.2	2957	Dzank1	double zinc ribbon and ankyrin repeat domains 1 (Dzank1), transcript variant X1, mRNA	0.27	-7.42	0.00066
XM_028863360.2	1815	Slc25a48	solute carrier family 25 member 48 (Slc25a48), transcript variant X2, mRNA	4.55	4.45	0.00067
XM_028862541.2	3315	Nlrp2	NLR family pyrin domain containing 2 (Nlrp2), mRNA	3.22	-2.16	0.00067
XM_028859096.2	3808	Ifit1	interferon-induced protein with tetratricopeptide repeats 1-like (LOC114684563), mRNA	1.68	2.1	0.00067
XM_037202728.1	2621	LOC114688539	zinc finger protein 54-like (LOC114688539), transcript variant X3, mRNA	0.08	7.42	0.00067
XM_028878467.2	3226	Atxn7l1	ataxin 7 like 1 (Atxn7l1), transcript variant X8, mRNA	0.06	6.92	0.00067
XM_028883566.2	6912	Map3k1	mitogen-activated protein kinase kinase kinase 1 (Map3k1), partial mRNA	31.67	-1.02	0.00068
XM_028870049.2	4520	Lancl1	LanC like 1 (Lancl1), mRNA	4.82	-1.12	0.00068
XM_028855689.2	675	Il4	interleukin 4 (Il4), mRNA	0.89	4.33	0.00068
XM_028861274.2	3753	Plagl1	PLAG1 like zinc finger 1 (Plagl1), transcript variant X1, mRNA	0.75	4.44	0.00068
XM_037207317.1	2066	Btrc	beta-transducin repeat containing E3 ubiquitin protein ligase (Btrc), transcript variant X3, mRNA	0.21	-6.5	0.00068
XM_028886653.2	7313	Ccdc88c	coiled-coil domain containing 88C (Ccdc88c), transcript variant X1, mRNA	17.69	-1.06	0.00069
XM_037198158.1	1669	Atp6v1c2	ATPase H+ transporting V1 subunit C2 (Atp6v1c2), transcript variant X4, mRNA	2.12	-2.87	0.00069
XM_028870393.2	1649	Phf11	PHD finger protein 11 (Phf11), transcript variant X1, mRNA	69.77	1.01	0.0007
XM_028860519.2	2249	St3gal5	ST3 beta-galactoside alpha-2,3-sialyltransferase 5 (St3gal5), transcript variant X1, mRNA	68.73	2.98	0.0007
XM_028882783.2	4328	Coro2a	coronin 2A (Coro2a), transcript variant X4, mRNA	3.09	2.34	0.0007
XM_037201587.1	2248	Litaf	lipopolysaccharide induced TNF factor (Litaf), transcript variant X1, mRNA	2.25	2.4	0.0007
XM_028890029.2	2560	Nuggc	nuclear GTPase, germinal center associated (Nuggc), mRNA	1.11	-2.53	0.0007
XM_028888274.2	3525	Rin3	Ras and Rab interactor 3 (Rin3), mRNA	69.31	1.16	0.00071
XM_028867471.2	2687	Cd47	CD47 molecule (Cd47), transcript variant X5, mRNA	36.4	1.09	0.00071
XM_028876790.2	2014	Atf3	activating transcription factor 3 (Atf3), transcript variant X2, mRNA	10.05	2.18	0.00071
XM_028867263.2	5190	Tle3	TLE family member 3, transcriptional corepressor (Tle3), transcript variant X8, mRNA	9.74	1.21	0.00071
XM_028869677.2	3136	Paox	polyamine oxidase (Paox), transcript variant X2, mRNA	6.62	1.33	0.00071
XM_028857088.2	2767	Gstcd	glutathione S-transferase C-terminal domain containing (Gstcd), transcript variant X4, mRNA	3.87	2.41	0.00071
XM_028886720.2	6144	Fzd5	frizzled class receptor 5 (Fzd5), mRNA	1.21	1.74	0.00071
XM_028890118.2	3164	Camk2a	calcium/calmodulin dependent protein kinase II alpha (Camk2a), mRNA	0.4	-3.89	0.00071
XM_028893140.2	7038	Ptprf	protein tyrosine phosphatase receptor type F (Ptprf), transcript variant X12, mRNA	0.04	7.33	0.00071
XM_028887956.2	1186	LOC114705843	H-2 class II histocompatibility antigen, A beta chain (LOC114705843), mRNA	503.3	-1.27	0.00072
XM_028860275.1	1629	LOC114685644	L-lactate dehydrogenase A chain (LOC114685644), transcript variant X3, mRNA	308.8	1.12	0.00072
XM_028879049.2	2980	Srpra	SRP receptor subunit alpha (Srpra), mRNA	33	0.98	0.00072
XM_037200720.1	3308	Ap2b1	adaptor related protein complex 2 subunit beta 1 (Ap2b1), transcript variant X3, mRNA	18.43	1.01	0.00072
XM_028889619.2	4979	Tmem94	transmembrane protein 94 (Tmem94), transcript variant X3, mRNA	9.41	-0.97	0.00072
XM_028873431.2	3785	Picalm	phosphatidylinositol binding clathrin assembly protein (Picalm), transcript variant X10, mRNA	7.37	2.06	0.00072
XM_028883612.2	2909	Appl2	adaptor protein, phosphotyrosine interacting with PH domain and leucine zipper 2 (Appl2), transcript variant X1, mRNA	7.1	-1.36	0.00072
XM_028893571.2	6976	Zmiz1	zinc finger MIZ-type containing 1 (Zmiz1), transcript variant X3, mRNA	5.52	-1.19	0.00072
XM_028892828.2	1835	Snx32	sorting nexin 32 (Snx32), mRNA	4.79	-1.62	0.00072
XM_028857448.2	1275	Them5	thioesterase superfamily member 5 (Them5), transcript variant X2, mRNA	0.25	6.86	0.00072
XM_028856986.2	3860	Ulk1	unc-51 like autophagy activating kinase 1 (Ulk1), transcript variant X1, mRNA	0.16	7.4	0.00072
XM_028867327.2	3360	LOC114691801	ATP-binding cassette sub-family G member 3-like (LOC114691801), transcript variant X1, mRNA	16.83	-1.34	0.00073
XM_037209858.1	898	LOC114687105	immunoglobulin lambda-1 light chain-like (LOC114687105), transcript variant X11, mRNA	15.83	-1.44	0.00073
XM_037198047.1	3503	Nlrc4	NLR family CARD domain containing 4 (Nlrc4), transcript variant X2, mRNA	1.84	3.32	0.00073
XM_037197249.1	2234	Dgat2	diacylglycerol O-acyltransferase 2 (Dgat2), transcript variant X1, mRNA	1.14	4.19	0.00073
XM_028861415.2	2428	Arhgef9	Cdc42 guanine nucleotide exchange factor 9 (Arhgef9), transcript variant X4, mRNA	0.2	-5.35	0.00073
XM_037196794.1	4669	Kitlg	KIT ligand (Kitlg), transcript variant X4, mRNA	0.13	-7.03	0.00073
XM_028888393.2	726	Smim29	small integral membrane protein 29 (Smim29), transcript variant X1, mRNA	18.76	-1.39	0.00074
XM_028860583.2	2985	Ccr1	C-C motif chemokine receptor 1 (Ccr1), mRNA	19.71	1.14	0.00075
XM_028888610.2	8246	Flna	filamin A (Flna), transcript variant X3, mRNA	10.92	1.22	0.00075
XM_028880777.2	1123	LOC114700934	bile salt sulfotransferase-like (LOC114700934), transcript variant X1, mRNA	0.45	5.76	0.00075
XM_037206658.1	2089	B3galnt1	beta-1,3-N-acetylgalactosaminyltransferase 1 (globoside blood group) (B3galnt1), transcript variant X6, mRNA	0.17	7.03	0.00075
XM_037208281.1	833	LOC119088460	uncharacterized LOC119088460 (LOC119088460), mRNA	23.47	-1.82	0.00076
XM_037197971.1	4226	Socs5	suppressor of cytokine signaling 5 (Socs5), mRNA	7.95	1.05	0.00076
XM_028855834.2	3266	Tlr12	toll-like receptor 12 (LOC114682047), mRNA	0.18	-3.77	0.00076
XM_028871717.2	2206	Mccc2	methylcrotonoyl-CoA carboxylase 2 (Mccc2), transcript variant X2, mRNA	5.55	-1.51	0.00078
XM_028855362.2	3095	Gbp1	guanylate-binding protein 1-like (LOC114681707), transcript variant X2, mRNA	2.49	3.58	0.00078
XR_005089960.1	1641	LOC119086628	uncharacterized LOC119086628 (LOC119086628), transcript variant X6, ncRNA	1.35	-3.31	0.00078
XM_037199132.1	2310	Egfl6	EGF like domain multiple 6 (Egfl6), transcript variant X3, mRNA	0.12	6.65	0.00078
XM_028862612.2	2120	Fbxo9	F-box protein 9 (Fbxo9), transcript variant X2, mRNA	11.34	1.55	0.00079
XM_028872813.2	7430	Lrrk1	leucine rich repeat kinase 1 (Lrrk1), transcript variant X1, mRNA	3.73	-1.26	0.00079
XM_028893765.2	2750	Tspyl5	TSPY like 5 (Tspyl5), mRNA	1.61	-2.2	0.00079
XM_037199943.1	5234	Agpat3	1-acylglycerol-3-phosphate O-acyltransferase 3 (Agpat3), transcript variant X3, mRNA	0.15	-7.28	0.00079
XM_028893273.2	1748	Dstn	destrin, actin depolymerizing factor (Dstn), mRNA	16.02	-1.14	0.0008
XM_028882220.2	3223	Tlr6	toll like receptor 6 (Tlr6), transcript variant X1, mRNA	15.21	1.48	0.0008
XM_028869062.2	4929	Ptpre	protein tyrosine phosphatase receptor type E (Ptpre), transcript variant X4, mRNA	12.61	1.11	0.00081
XM_028894246.2	5862	Smarca2	SWI/SNF related, matrix associated, actin dependent regulator of chromatin, subfamily a, member 2 (Smarca2), transcript variant X7, mRNA	4.6	-2.07	0.00081
XM_028884279.2	5691	Dagla	diacylglycerol lipase alpha (Dagla), mRNA	2.54	2.22	0.00081
XM_037199366.1	4509	Ikbkg	inhibitor of nuclear factor kappa B kinase regulatory subunit gamma (Ikbkg), transcript variant X5, mRNA	0.59	5.06	0.00081
XM_028867520.2	1928	Tfg	trafficking from ER to golgi regulator (Tfg), transcript variant X2, mRNA	5.55	1.45	0.00082
XM_028877800.2	3245	Gramd1a	GRAM domain containing 1A (Gramd1a), transcript variant X5, mRNA	3.66	3.04	0.00082
XM_028874850.2	5413	Ift172	intraflagellar transport 172 (Ift172), transcript variant X1, mRNA	2.98	-1.31	0.00083
XM_037204350.1	8700	Foxp1	forkhead box P1 (Foxp1), transcript variant X3, mRNA	1.16	-2.67	0.00083
XM_037205551.1	5754	Zmynd8	zinc finger MYND-type containing 8 (Zmynd8), transcript variant X6, mRNA	0.14	-4.55	0.00083
XM_028865956.2	1417	Ctsh	cathepsin H (Ctsh), mRNA	155.72	1.19	0.00084
XM_028878521.2	1155	Epsti1	epithelial stromal interaction 1 (Epsti1), transcript variant X6, mRNA	35.55	1.21	0.00084
XM_028870743.2	1451	Maea	macrophage erythroblast attacher, E3 ubiquitin ligase (Maea), transcript variant X1, mRNA	24.7	1.08	0.00084
XM_028871903.2	4921	Has2	hyaluronan synthase 2 (Has2), mRNA	0.13	3.85	0.00084
XM_037200627.1	5604	Tsc2	TSC complex subunit 2 (Tsc2), transcript variant X9, mRNA	0.03	7.61	0.00084
XM_037197983.1	1707	LOC119086440	basic proline-rich protein-like (LOC119086440), mRNA	282.64	1.37	0.00085
XM_028892416.2	8004	Dennd5b	DENN domain containing 5B (Dennd5b), transcript variant X3, mRNA	4.61	-2.63	0.00085
XM_028895248.2	3443	Herc6	HECT and RLD domain containing E3 ubiquitin protein ligase family member 6 (Herc6), transcript variant X4, mRNA	1.96	3.17	0.00085
XM_028879921.2	2443	Mx2	interferon-induced GTP-binding protein Mx2 (LOC114700347), mRNA	151.78	1.5	0.00086
XM_037202373.1	1270	Fxyd5	FXYD domain containing ion transport regulator 5 (Fxyd5), transcript variant X5, mRNA	9.23	1.51	0.00086
XM_028866421.2	1303	Mpzl3	myelin protein zero like 3 (Mpzl3), mRNA	6.56	1.83	0.00086
XR_003733611.2	4007	LOC114686727	uncharacterized LOC114686727 (LOC114686727), transcript variant X1, ncRNA	5.7	-1.48	0.00086
XM_037197832.1	2634	Pwwp3a	PWWP domain containing 3A, DNA repair factor (Pwwp3a), transcript variant X2, mRNA	0.17	7.09	0.00086
XM_028888715.2	4886	Zfyve9	zinc finger FYVE-type containing 9 (Zfyve9), transcript variant X3, mRNA	0.09	7.27	0.00086
XM_028872842.2	4875	Mtmr10	myotubularin related protein 10 (Mtmr10), mRNA	15.55	-1.14	0.00087
XM_028856258.2	4099	Mindy1	MINDY lysine 48 deubiquitinase 1 (Mindy1), transcript variant X5, mRNA	8.67	1.24	0.00087
XM_028866594.2	3827	Ermard	ER membrane associated RNA degradation (Ermard), transcript variant X5, mRNA	0.21	-7.29	0.00087
XM_028885530.1	3797	Sez6l2	seizure related 6 homolog like 2 (Sez6l2), transcript variant X1, mRNA	0.15	-4.43	0.00087
XM_028882784.2	4589	Coro2a	coronin 2A (Coro2a), transcript variant X1, mRNA	0.08	7.15	0.00087
XM_028886172.2	1301	Ppa1	inorganic pyrophosphatase 1 (Ppa1), transcript variant X2, mRNA	42.27	1.19	0.00088
XM_028865756.2	4198	Tbc1d8	TBC1 domain family member 8 (Tbc1d8), transcript variant X1, mRNA	0.11	7.45	0.00088
XM_028887428.2	3860	Tm9sf4	transmembrane 9 superfamily member 4 (Tm9sf4), transcript variant X1, mRNA	13.71	0.9	0.00089
XM_028889574.2	730	Arl5c	ADP ribosylation factor like GTPase 5C (Arl5c), transcript variant X3, mRNA	5.48	2.84	0.00089
XM_028887029.2	3268	Uba7	ubiquitin like modifier activating enzyme 7 (Uba7), transcript variant X4, mRNA	2.02	2.42	0.00089
XR_003733893.1	909	LOC114689384	uncharacterized LOC114689384 (LOC114689384), ncRNA	0.86	-7.37	0.00089
XM_028860068.2	2332	Inhba	inhibin subunit beta A (Inhba), transcript variant X3, mRNA	0.25	5.14	0.00089
XM_037205688.1	1751	Slc25a48	solute carrier family 25 member 48 (Slc25a48), transcript variant X4, mRNA	0.18	6.9	0.00089
XM_028857814.2	5635	Rimklb	ribosomal modification protein rimK like family member B (Rimklb), transcript variant X1, mRNA	0.05	7.35	0.00089
XM_028867781.2	4885	Xylt1	xylosyltransferase 1 (Xylt1), mRNA	4.96	-1.34	0.0009
XM_028883643.2	5848	Btbd11	BTB domain containing 11 (Btbd11), transcript variant X1, mRNA	1.02	-3.07	0.0009
XM_028881009.2	2870	Mboat1	membrane bound O-acyltransferase domain containing 1 (Mboat1), mRNA	15.57	1.32	0.00091
XM_028893381.2	4784	Tmem87b	transmembrane protein 87B (Tmem87b), transcript variant X1, mRNA	5.6	1.25	0.00091
XM_028885885.2	2407	P2rx7	purinergic receptor P2X 7 (P2rx7), transcript variant X1, mRNA	5.56	-2.05	0.00091
XM_028876203.2	3151	Sp100	nuclear autoantigen Sp-100-like (LOC114697861), transcript variant X5, mRNA	3.28	2.21	0.00091
XM_037211595.1	5182	Mcf2l	MCF.2 cell line derived transforming sequence like (Mcf2l), transcript variant X11, mRNA	0.28	-3.83	0.00091
XM_028863702.2	1105	Znf346	zinc finger protein 346 (Znf346), transcript variant X2, mRNA	0.22	6.87	0.00091
XM_037202833.1	3159	Tex38	testis expressed 38 (Tex38), transcript variant X2, mRNA	0.15	-6.61	0.00091
XM_028857020.2	10861	Ep400	E1A binding protein p400 (Ep400), transcript variant X13, mRNA	0.13	5.61	0.00091
XM_028891261.1	3575	Fbh1	F-box DNA helicase 1 (Fbh1), transcript variant X1, mRNA	23.83	0.98	0.00092
XM_028891119.2	1217	Sfxn3	sideroflexin 3 (Sfxn3), transcript variant X2, mRNA	10.62	-1.46	0.00092
XM_028877552.2	2646	P2ry2	purinergic receptor P2Y2 (P2ry2), transcript variant X1, mRNA	7.87	1.45	0.00092
XM_028890642.2	3625	Capn10	calpain 10 (Capn10), transcript variant X1, mRNA	2.6	1.61	0.00092
XM_037201756.1	2249	Opa3	outer mitochondrial membrane lipid metabolism regulator OPA3 (Opa3), transcript variant X1, mRNA	1.7	2.12	0.00092
XM_037210624.1	21911	Syne2	spectrin repeat containing nuclear envelope protein 2 (Syne2), transcript variant X3, mRNA	0.02	7.14	0.00092
XM_037199756.1	1398	LOC114686366	H-2 class I histocompatibility antigen, L-D alpha chain-like (LOC114686366), transcript variant X19, mRNA	52.69	1.05	0.00093
XM_028892219.2	1562	Haus4	HAUS augmin like complex subunit 4 (Haus4), transcript variant X1, mRNA	22.14	-1.22	0.00093
XM_028861331.2	2091	Cd19	CD19 molecule (Cd19), transcript variant X2, mRNA	18.07	-1.46	0.00093
XM_028870179.2	2026	Nipsnap2	nipsnap homolog 2 (Nipsnap2), mRNA	14.82	-1.02	0.00093
XM_028862049.1	9270	Sesn3	sestrin 3 (Sesn3), transcript variant X1, mRNA	10.1	-1.1	0.00093
XM_028890979.2	1784	Mmp3	stromelysin-1 (LOC114708015), mRNA	0.16	6.76	0.00093
XM_028880008.2	7892	Rapgef6	Rap guanine nucleotide exchange factor 6 (Rapgef6), transcript variant X11, mRNA	0.03	7.53	0.00094
XM_028856852.2	2350	Lef1	lymphoid enhancer binding factor 1 (Lef1), transcript variant X1, mRNA	23.61	-1.34	0.00095
XM_028866692.2	1840	Ccr6	C-C motif chemokine receptor 6 (Ccr6), transcript variant X1, mRNA	5.64	-2.15	0.00095
XM_028867244.2	2294	Tank	TRAF family member associated NFKB activator (Tank), transcript variant X3, mRNA	2.37	2.09	0.00095
XM_037203790.1	3602	Tnip3	TNFAIP3 interacting protein 3 (Tnip3), transcript variant X3, mRNA	2.05	1.92	0.00095
XM_028859034.2	1253	Prss37	serine protease 37 (Prss37), mRNA	0.18	6.46	0.00095
XM_037201922.1	747	LOC119087226	RAS guanyl-releasing protein 1-like (LOC119087226), mRNA	15.76	-1.63	0.00096
XM_028856846.2	2670	Vat1	vesicle amine transport 1 (Vat1), mRNA	10.08	2.13	0.00096
XM_028894974.2	1603	Prss23	serine protease 23 (Prss23), transcript variant X2, mRNA	2.12	3.36	0.00096
XM_028889494.2	3207	Krt222	keratin 222 (Krt222), transcript variant X1, mRNA	0.1	6.9	0.00096
XM_028864961.2	10540	Atm	ATM serine/threonine kinase (Atm), mRNA	4.76	-1.07	0.00097
XM_028861104.2	6808	Stxbp5	syntaxin binding protein 5 (Stxbp5), transcript variant X4, mRNA	2.36	2.05	0.00097
XM_037209793.1	3332	Ubxn7	UBX domain protein 7 (Ubxn7), transcript variant X2, mRNA	0.22	-7.2	0.00097
XM_028869898.2	4681	Acp3	acid phosphatase 3 (Acp3), transcript variant X1, mRNA	9.54	1.26	0.00098
XM_028858984.2	1448	Tmem45b	transmembrane protein 45B (Tmem45b), mRNA	8.41	1.77	0.00098
XM_028861865.1	2824	Slc17a7	solute carrier family 17 member 7 (Slc17a7), transcript variant X1, mRNA	0.18	-4.68	0.00098
XM_028883309.2	3256	Ntng2	netrin G2 (Ntng2), transcript variant X3, mRNA	0.18	-6.03	0.00098
XM_028866013.2	8111	Xrn1	5'-3' exoribonuclease 1 (Xrn1), transcript variant X2, mRNA	0.1	-7.37	0.00098
XR_003736138.2	716	LOC114703406	uncharacterized LOC114703406 (LOC114703406), ncRNA	43.09	1.06	0.00099
XM_028875191.2	3314	Bcl6	BCL6 transcription repressor (Bcl6), mRNA	22.13	1.07	0.00099
XM_028889320.2	2822	LOC114706825	putative RNA-binding protein Luc7-like 2 (LOC114706825), transcript variant X7, mRNA	0.16	7.39	0.00099
XM_028865312.2	1267	Cd79b	CD79b molecule (Cd79b), mRNA	247.98	-1.37	0.001
XM_028865102.2	962	Ssr2	signal sequence receptor subunit 2 (Ssr2), mRNA	58.21	0.93	0.001
XM_028863284.2	2197	Treml2	triggering receptor expressed on myeloid cells like 2 (Treml2), mRNA	41.14	1.12	0.001
XM_028875884.2	6385	Pde3b	phosphodiesterase 3B (Pde3b), mRNA	11.08	-1.01	0.001
XM_028855902.2	3142	Colgalt1	collagen beta(1-O)galactosyltransferase 1 (Colgalt1), mRNA	10.8	-1.06	0.001
XM_028860056.2	4902	Tfrc	transferrin receptor (Tfrc), mRNA	9.93	1.57	0.001
XM_028860339.2	1640	LOC114685693	fatty acid desaturase 3-like (LOC114685693), mRNA	0.14	4.76	0.001
XM_037208385.1	3604	Lcp1	lymphocyte cytosolic protein 1 (Lcp1), transcript variant X2, mRNA	461.36	1.32	0.0011
XM_028887934.2	1195	LOC114705818	H-2 class II histocompatibility antigen, I-E beta chain (LOC114705818), transcript variant X1, mRNA	235.15	-1.18	0.0011
XM_028888858.2	2646	Osbpl9	oxysterol binding protein like 9 (Osbpl9), transcript variant X8, mRNA	37.16	1	0.0011
XM_028875214.2	1895	Dnajb11	DnaJ heat shock protein family (Hsp40) member B11 (Dnajb11), mRNA	31.29	0.91	0.0011
XR_005091645.1	3720	Pdcd4	programmed cell death 4 (Pdcd4), transcript variant X5, misc_RNA	16.8	-1.02	0.0011
XM_037196772.1	1548	Glipr1	GLI pathogenesis related 1 (Glipr1), transcript variant X2, mRNA	16.46	-1.19	0.0011
XM_028887219.2	570	Dnph1	2'-deoxynucleoside 5'-phosphate N-hydrolase 1 (Dnph1), mRNA	15.52	-1.74	0.0011
XM_028868749.2	1945	Entpd2	ectonucleoside triphosphate diphosphohydrolase 2 (Entpd2), transcript variant X1, mRNA	14.29	-1.17	0.0011
XM_028895319.2	1515	Hyal3	hyaluronidase 3 (Hyal3), mRNA	12.04	1.26	0.0011
XM_028888054.2	2299	Slc44a4	solute carrier family 44 member 4 (Slc44a4), mRNA	10.15	-1.7	0.0011
XM_028890420.2	523	Krbox1	KRAB box domain containing 1 (Krbox1), transcript variant X1, mRNA	8.61	2.51	0.0011
XM_028862599.2	2697	Fscn1	fascin actin-bundling protein 1 (Fscn1), mRNA	8.4	1.65	0.0011
XM_028883081.2	5253	Icmt	isoprenylcysteine carboxyl methyltransferase (Icmt), mRNA	7.71	1.11	0.0011
XM_028866719.2	5307	Smg6	SMG6 nonsense mediated mRNA decay factor (Smg6), transcript variant X2, mRNA	6.86	-0.99	0.0011
XM_028875069.2	1787	Pdcd4	programmed cell death 4 (Pdcd4), transcript variant X2, mRNA	5.74	-2.24	0.0011
XM_037201773.1	3982	Iigp1	interferon-inducible GTPase 1-like (LOC114688409), mRNA	2.57	2.44	0.0011
XM_028888260.2	3088	Prima1	proline rich membrane anchor 1 (Prima1), transcript variant X1, mRNA	2.19	-2.27	0.0011
XM_028892605.2	3985	Nipa1	NIPA magnesium transporter 1 (Nipa1), mRNA	1.63	-1.79	0.0011
XM_028870715.2	11970	Prr14l	proline rich 14 like (Prr14l), transcript variant X1, mRNA	0.57	-3.19	0.0011
XM_037210478.1	682	LOC119088961	uncharacterized LOC119088961 (LOC119088961), mRNA	0.55	3.56	0.0011
XM_037211067.1	1430	Il19	interleukin 19 (Il19), transcript variant X3, mRNA	0.29	5.34	0.0011
XM_037204287.1	2214	Rad18	RAD18 E3 ubiquitin protein ligase (Rad18), transcript variant X5, mRNA	0.21	-6.59	0.0011
XR_005092895.1	878	LOC119089048	uncharacterized LOC119089048 (LOC119089048), ncRNA	0.21	6.26	0.0011
XM_037209052.1	5107	Rbm47	RNA binding motif protein 47 (Rbm47), transcript variant X3, mRNA	0.17	4.94	0.0011
XM_028854915.2	4085	Pnma8b	PNMA family member 8B (Pnma8b), mRNA	0.13	-4.71	0.0011
XM_028891695.2	7392	Ptch1	patched 1 (Ptch1), transcript variant X3, mRNA	0.09	-6.99	0.0011
XM_037200127.1	1769	Prim2	DNA primase subunit 2 (Prim2), transcript variant X2, mRNA	0.09	6.99	0.0011
XM_028857518.2	4477	Epn2	epsin 2 (Epn2), transcript variant X3, mRNA	0.08	7.02	0.0011
XM_037207244.1	2313	Cryz	crystallin zeta (Cryz), transcript variant X4, mRNA	0.08	7.25	0.0011
XM_028863621.2	3486	LOC114689254	UL16-binding protein 1-like (LOC114689254), transcript variant X2, mRNA	0.07	7.24	0.0011
XM_037206437.1	9957	Celf2	CUGBP Elav-like family member 2 (Celf2), transcript variant X6, mRNA	0.06	-6.43	0.0011
XM_028893931.2	7916	Ccdc93	coiled-coil domain containing 93 (Ccdc93), transcript variant X1, mRNA	0.05	7.18	0.0011
XM_028880001.2	8182	Rapgef6	Rap guanine nucleotide exchange factor 6 (Rapgef6), transcript variant X4, mRNA	0.03	7.45	0.0011
XM_028886842.2	1810	Sting1	stimulator of interferon response cGAMP interactor 1 (Sting1), transcript variant X1, mRNA	164.05	1.06	0.0012
XR_005091169.1	935	LOC119087660	uncharacterized LOC119087660 (LOC119087660), ncRNA	70.09	1.61	0.0012
XM_028866355.2	2070	Snx1	sorting nexin 1 (Snx1), transcript variant X1, mRNA	42.52	-0.88	0.0012
XM_037200745.1	1796	LOC114691448	protein disulfide-isomerase A3-like (LOC114691448), mRNA	41.03	1.3	0.0012
XM_028868981.2	4392	Ppp1r9b	protein phosphatase 1 regulatory subunit 9B (Ppp1r9b), mRNA	38.05	-0.89	0.0012
XM_028880034.2	1827	Ccdc69	coiled-coil domain containing 69 (Ccdc69), mRNA	19.49	-1.16	0.0012
XM_037209479.1	4939	Fcho2	FCH and mu domain containing endocytic adaptor 2 (Fcho2), mRNA	14.52	1.18	0.0012
XM_028866951.2	1563	Adap2	ArfGAP with dual PH domains 2 (Adap2), transcript variant X4, mRNA	8.56	2	0.0012
XM_037198067.1	6335	Fosl2	FOS like 2, AP-1 transcription factor subunit (Fosl2), transcript variant X3, mRNA	7.15	1.57	0.0012
XM_028895061.2	5541	Jade1	jade family PHD finger 1 (Jade1), transcript variant X5, mRNA	4.78	2.29	0.0012
XM_028859021.2	7049	Nfatc2	nuclear factor of activated T cells 2 (Nfatc2), transcript variant X2, mRNA	3.73	-1.6	0.0012
XR_005090463.1	543	LOC119087033	uncharacterized LOC119087033 (LOC119087033), ncRNA	3.41	2.61	0.0012
XM_028867759.2	4114	Rbms1	RNA binding motif single stranded interacting protein 1 (Rbms1), transcript variant X7, mRNA	2.63	1.46	0.0012
XM_028866319.2	2005	Oaf	out at first homolog (Oaf), mRNA	2.17	2.18	0.0012
XM_037210591.1	1614	Sav1	salvador family WW domain containing protein 1 (Sav1), transcript variant X2, mRNA	1.84	2.39	0.0012
XM_028881919.2	1208	Cxcl9	C-X-C motif chemokine ligand 9 (Cxcl9), mRNA	1.75	2.96	0.0012
XR_005090866.1	1372	LOC119087418	uncharacterized LOC119087418 (LOC119087418), ncRNA	1.7	-2.56	0.0012
XM_028861846.1	5142	Pcdhgb2	protocadherin gamma-B2-like (LOC114687148), mRNA	1.63	1.63	0.0012
XR_005090774.1	1305	LOC119087363	uncharacterized LOC119087363 (LOC119087363), transcript variant X2, ncRNA	1.39	2.91	0.0012
XM_028887915.2	6416	Notch4	notch receptor 4 (Notch4), mRNA	1.2	-1.73	0.0012
XM_037203137.1	3525	Slc66a1	solute carrier family 66 member 1 (Slc66a1), transcript variant X4, mRNA	1	-4.55	0.0012
XM_028872485.2	3060	Carm1	coactivator associated arginine methyltransferase 1 (Carm1), transcript variant X4, mRNA	0.53	3.24	0.0012
XM_037203681.1	1044	Ssmem1	serine rich single-pass membrane protein 1 (Ssmem1), transcript variant X3, mRNA	0.45	4.53	0.0012
XM_028892867.2	2783	Cd248	CD248 molecule (Cd248), mRNA	0.4	-3.09	0.0012
XM_028878181.2	1473	Cpb2	carboxypeptidase B2 (Cpb2), mRNA	0.34	3.68	0.0012
XM_037200498.1	3508	Akt1s1	AKT1 substrate 1 (Akt1s1), transcript variant X1, mRNA	0.34	-4.34	0.0012
XM_028872071.2	3897	Ccdc80	coiled-coil domain containing 80 (Ccdc80), transcript variant X2, mRNA	0.31	4.93	0.0012
XM_037209830.1	1401	Fetub	fetuin B (Fetub), transcript variant X1, mRNA	0.24	6.98	0.0012
XM_028891329.2	2717	Cd36	CD36 molecule (Cd36), transcript variant X4, mRNA	0.2	-6.81	0.0012
XM_028871333.1	4221	Dctn1	dynactin subunit 1 (Dctn1), transcript variant X5, mRNA	0.18	-7.29	0.0012
XM_028858530.2	2750	Palm	paralemmin (Palm), transcript variant X2, mRNA	0.11	4.96	0.0012
XM_028893736.2	4744	Kidins220	kinase D interacting substrate 220 (Kidins220), transcript variant X11, mRNA	0.1	-5.13	0.0012
XM_037204803.1	4196	Pkp4	plakophilin 4 (Pkp4), transcript variant X10, mRNA	0.09	6.95	0.0012
XM_037202632.1	4202	Musk	muscle associated receptor tyrosine kinase (Musk), mRNA	0.08	4.93	0.0012
XM_028857919.2	4071	Gk	glycerol kinase (Gk), transcript variant X3, mRNA	0.07	6.79	0.0012
XM_028862834.2	2931	Adgre5	adhesion G protein-coupled receptor E5 (Adgre5), transcript variant X3, mRNA	25.13	1.23	0.0013
XM_028856366.2	4144	Cd28	CD28 molecule (Cd28), partial mRNA	24.54	-1.2	0.0013
XM_028870694.2	791	Rnf185	ring finger protein 185 (Rnf185), transcript variant X1, mRNA	13.14	1.38	0.0013
XM_028868538.2	7463	Ncoa3	nuclear receptor coactivator 3 (Ncoa3), transcript variant X5, mRNA	9.72	-1.42	0.0013
XM_028881967.2	2038	Kynu	kynureninase (Kynu), mRNA	7.48	-1.35	0.0013
XM_037204931.1	5740	Tnks1bp1	tankyrase 1 binding protein 1 (Tnks1bp1), mRNA	6.66	-0.91	0.0013
XM_028857247.2	7492	Wdr7	WD repeat domain 7 (Wdr7), mRNA	5.25	0.99	0.0013
XM_028871021.2	2754	LOC114694205	zinc finger protein 250 (LOC114694205), transcript variant X1, mRNA	4.81	-1.49	0.0013
XM_028862294.2	3148	LOC114687697	junction plakoglobin (LOC114687697), transcript variant X2, mRNA	4.22	-2.69	0.0013
XM_028874109.2	3948	Agfg1	ArfGAP with FG repeats 1 (Agfg1), transcript variant X5, mRNA	3.42	1.38	0.0013
XM_028877468.2	2544	Tsku	tsukushi, small leucine rich proteoglycan (Tsku), transcript variant X1, mRNA	3.25	2.91	0.0013
XM_028866292.2	2823	Gramd1b	GRAM domain containing 1B (Gramd1b), transcript variant X16, mRNA	1.82	3.95	0.0013
XM_028881672.2	6850	Zfx	zinc finger protein X-linked (Zfx), transcript variant X2, mRNA	0.92	-3.61	0.0013
XM_037200061.1	2306	Ceacam18	CEA cell adhesion molecule 18 (Ceacam18), mRNA	0.42	2.74	0.0013
XM_028854846.2	5280	Hook3	hook microtubule tethering protein 3 (Hook3), transcript variant X3, mRNA	0.11	-6.92	0.0013
XM_028875425.2	3116	Znf436	zinc finger protein 436 (Znf436), transcript variant X6, mRNA	0.08	6.98	0.0013
XM_037209058.1	4900	Rbm47	RNA binding motif protein 47 (Rbm47), transcript variant X11, mRNA	0.08	6.05	0.0013
XM_028864132.2	6038	Tril	TLR4 interactor with leucine rich repeats (Tril), mRNA	0.06	-6.22	0.0013
XM_037203764.1	2943	Chn2	chimerin 2 (Chn2), transcript variant X2, mRNA	0.05	7.2	0.0013
XM_028890998.2	7669	Tns3	tensin 3 (Tns3), transcript variant X5, mRNA	0.04	7.1	0.0013
XM_028866922.2	11019	Nf1	neurofibromin 1 (Nf1), transcript variant X5, mRNA	0.03	7.17	0.0013
XM_028874999.2	9205	Pcdh19	protocadherin 19 (Pcdh19), transcript variant X1, mRNA	0.03	6.72	0.0013
XR_003735345.2	10673	Slc5a3	solute carrier family 5 member 3 (Slc5a3), transcript variant X5, misc_RNA	0.01	7.35	0.0013
XR_003733830.2	677	LOC114688979	uncharacterized LOC114688979 (LOC114688979), ncRNA	2914.61	2.48	0.0014
XM_037199455.1	1269	Sat1	spermidine/spermine N1-acetyltransferase 1 (Sat1), transcript variant X2, mRNA	28.31	0.97	0.0014
XR_005089823.1	676	LOC114688351	uncharacterized LOC114688351 (LOC114688351), ncRNA	26.13	-1.53	0.0014
XM_028865200.2	1003	Milr1	mast cell immunoglobulin like receptor 1 (Milr1), transcript variant X2, mRNA	23.61	-1.2	0.0014
XM_028883366.2	4803	Rxra	retinoid X receptor alpha (Rxra), mRNA	18.16	-1.1	0.0014
XM_028878072.2	857	LOC114699150	arachidonate 5-lipoxygenase activating protein (LOC114699150), transcript variant X2, mRNA	9.65	1.79	0.0014
XM_028872422.2	6119	Col5a3	collagen type V alpha 3 chain (Col5a3), mRNA	7.85	1.68	0.0014
XM_028888367.2	3848	Pacsin1	protein kinase C and casein kinase substrate in neurons 1 (Pacsin1), transcript variant X1, mRNA	3.46	-1.7	0.0014
XM_028881594.2	2392	Cd80	CD80 molecule (Cd80), mRNA	3.35	1.95	0.0014
XM_037208991.1	1583	Upp1	uridine phosphorylase 1 (Upp1), transcript variant X3, mRNA	2.91	2.94	0.0014
XM_037204371.1	926	Il36a	interleukin 36 alpha (Il36a), transcript variant X1, mRNA	2.7	3.13	0.0014
XM_028876654.2	2703	Lad1	ladinin 1 (Lad1), mRNA	2.31	-2.49	0.0014
XM_028875980.2	5647	Jam2	junctional adhesion molecule 2 (Jam2), mRNA	1.93	-1.6	0.0014
XM_037200733.1	1108	Rpl3l	ribosomal protein L3 like (Rpl3l), transcript variant X3, mRNA	1.62	3.63	0.0014
XM_028887718.2	4004	Klhl14	kelch like family member 14 (Klhl14), mRNA	1.14	-2.1	0.0014
XM_037201369.1	728	Csf2	colony stimulating factor 2 (Csf2), mRNA	0.73	4.13	0.0014
XM_037201478.1	3243	Ccdc154	coiled-coil domain containing 154 (Ccdc154), transcript variant X5, mRNA	0.25	4.36	0.0014
XM_028881579.2	863	Fgf23	fibroblast growth factor 23 (Fgf23), mRNA	0.2	6.19	0.0014
XM_037205892.1	2184	Slc17a2	solute carrier family 17 member 2 (Slc17a2), transcript variant X4, mRNA	0.2	-5.03	0.0014
XM_037198911.1	3913	Enox2	ecto-NOX disulfide-thiol exchanger 2 (Enox2), transcript variant X2, mRNA	0.19	-4.64	0.0014
XM_028873467.2	3494	Rab30	RAB30, member RAS oncogene family (Rab30), transcript variant X3, mRNA	0.12	7.25	0.0014
XM_028882333.2	4849	Tbc1d14	TBC1 domain family member 14 (Tbc1d14), transcript variant X3, mRNA	0.11	-6.86	0.0014
XM_028893590.2	10070	Kif1b	kinesin family member 1B (Kif1b), transcript variant X2, mRNA	0.07	-7.2	0.0014
XM_037206612.1	6985	Med12l	mediator complex subunit 12L (Med12l), transcript variant X2, mRNA	0.07	-6.53	0.0014
XM_028878964.2	4108	Phf21a	PHD finger protein 21A (Phf21a), transcript variant X7, mRNA	0.04	7.31	0.0014
XM_028893592.2	10028	Kif1b	kinesin family member 1B (Kif1b), transcript variant X4, mRNA	0.04	7.02	0.0014
XM_028876192.2	2285	Sp110	SP110 nuclear body protein (Sp110), transcript variant X1, mRNA	52.3	0.95	0.0015
XM_037199606.1	1875	Ccnd3	cyclin D3 (Ccnd3), transcript variant X2, mRNA	28.32	0.95	0.0015
XM_028871672.2	1782	F2rl2	coagulation factor II thrombin receptor like 2 (F2rl2), mRNA	25.64	1.67	0.0015
XM_028878126.2	2544	Kiaa0930	KIAA0930 ortholog (Kiaa0930), transcript variant X1, mRNA	24.65	-1.01	0.0015
[truncated: 52,468 more rows]
