# Supplementary material for: The infection-tolerant white-footed deermouse tempers interferon responses to endotoxin in comparison to the mouse and rat
Source: eLife. 2024 Jan 9;12:RP90135. doi: 10.7554/eLife.90135 (PMC10945503; doi:10.7554/eLife.90135)
Supplement: Figure 3—source data 2. [file elife-90135-fig3-data2.xlsx]

## Sheet: Figure 3-Source Data 2
Figure 3-Source Data 2. Differentially expressed gene analysis for M. musculus
accession	length	gene	product	maximum group mean	fold-change	FDR p-value
NM_008337.4	1210	Ifng	interferon gamma (Ifng). mRNA	45.57	643.68	1.3e-78
NM_021274.2	1120	Cxcl10	chemokine (C-X-C motif) ligand 10 (Cxcl10). mRNA	30.07	681.88	1e-73
NM_009140.2	1083	Cxcl2	chemokine (C-X-C motif) ligand 2 (Cxcl2). mRNA	38.95	662.22	8.6e-50
NM_013652.2	674	Ccl4	chemokine (C-C motif) ligand 4 (Ccl4). mRNA	26.16	64.04	9.2e-41
NM_011337.2	804	Ccl3	chemokine (C-C motif) ligand 3 (Ccl3). mRNA	26.96	55.85	1.3e-40
NM_001077509.1	2115	Tnfrsf9	tumor necrosis factor receptor superfamily. member 9 (Tnfrsf9). transcript variant 3. mRNA	4.67	412.45	4e-36
NM_008392.1	2588	Acod1	aconitate decarboxylase 1 (Acod1). mRNA	20.88	102.8	1.1e-35
NM_008694.2	1176	Ngp	neutrophilic granule protein (Ngp). mRNA	127.14	86.13	1e-33
NM_013542.3	1528	Gzmb	granzyme B (Gzmb). mRNA	67.78	42.67	5.2e-31
NR_003508.1	2428	Mx2	MX dynamin-like GTPase 2 (Mx2). transcript variant 2. non-coding RNA	6.46	27.64	5.4e-31
NM_010720.3	3787	Lipg	lipase. endothelial (Lipg). mRNA	2.37	658.43	6.9e-30
NR_003520.1	2697	Mx1	MX dynamin-like GTPase 1 (Mx1). transcript variant 2. non-coding RNA	6.17	35.13	3.3e-28
NM_009921.2	599	Camp	cathelicidin antimicrobial peptide (Camp). mRNA	39	63.76	2.2e-27
NM_001281819.2	5088	Ace	angiotensin I converting enzyme (peptidyl-dipeptidase A) 1 (Ace). transcript variant 3. mRNA	3.51	-153.15	2.5e-27
NM_001168615.1	3498	Tifab	TRAF-interacting protein with forkhead-associated domain. family member B (Tifab). transcript variant 1. mRNA	2.29	-133.08	6.6e-27
NM_008768.2	779	Orm1	orosomucoid 1 (Orm1). mRNA	7.13	144.69	5.3e-26
NM_008522.3	2742	Ltf	lactotransferrin (Ltf). mRNA	27.36	52.23	2.5e-24
NM_008331.3	2638	Ifit1	interferon-induced protein with tetratricopeptide repeats 1 (Ifit1). mRNA	10.69	38.15	3.1e-24
NM_011909.2	1778	Usp18	ubiquitin specific peptidase 18 (Usp18). mRNA	6.64	33.92	3.3e-23
NM_010807.4	1611	Marcksl1	MARCKS-like 1 (Marcksl1). mRNA	23.14	17.55	4e-23
NM_153564.2	3021	Gbp5	guanylate binding protein 5 (Gbp5). mRNA	9.25	15.24	1.4e-22
NM_008920.4	838	Prg2	proteoglycan 2. bone marrow (Prg2). mRNA	13.26	140.74	2.3e-22
NM_015811.2	1343	Rgs1	regulator of G-protein signaling 1 (Rgs1). mRNA	5.69	40.02	4.1e-22
NM_008630.2	556	Mt2	metallothionein 2 (Mt2). mRNA	14.4	234.3	7.4e-22
NM_011636.2	2141	Plscr1	phospholipid scramblase 1 (Plscr1). mRNA	6.02	18.44	4e-21
NM_010493.3	2593	Icam1	intercellular adhesion molecule 1 (Icam1). mRNA	18.96	7.92	4.9e-21
NM_001033122.4	1631	Cd69	CD69 antigen (Cd69). mRNA	17.51	8.63	1.9e-20
NM_011817.2	1081	Gadd45g	growth arrest and DNA-damage-inducible 45 gamma (Gadd45g). mRNA	11.61	16.34	3.8e-20
NM_008491.1	853	Lcn2	lipocalin 2 (Lcn2). mRNA	254.65	32.65	4e-19
NM_010299.3	4257	Gm2a	GM2 ganglioside activator protein (Gm2a). mRNA	7.83	-9.06	1.1e-18
NM_001359945.1	2201	Oasl1	2'-5' oligoadenylate synthetase-like 1 (Oasl1). transcript variant 1. mRNA	5.79	203.27	1.3e-18
NM_010591.2	3187	Jun	jun proto-oncogene (Jun). mRNA	5.28	9.39	3.7e-18
NM_001005858.3	2013	Ifit3b	interferon-induced protein with tetratricopeptide repeats 3B (Ifit3b). mRNA	3.99	37.25	2e-17
NR_132129.1	2712	Gbp11	guanylate binding protein 11 (Gbp11). transcript variant 1. non-coding. non-coding RNA	1.62	44.28	2.1e-17
NM_010907.2	1592	Nfkbia	nuclear factor of kappa light polypeptide gene enhancer in B cells inhibitor. alpha (Nfkbia). mRNA	47.15	7.01	8.3e-17
NM_009397.3	4437	Tnfaip3	tumor necrosis factor. alpha-induced protein 3 (Tnfaip3). transcript variant 1. mRNA	8.39	18.21	3.3e-16
NM_183201.4	5989	Slfn5	schlafen 5 (Slfn5). mRNA	8.02	12.25	5.2e-16
NM_001039701.3	2480	Il1rn	interleukin 1 receptor antagonist (Il1rn). transcript variant 2. mRNA	14.25	16.23	6e-16
NM_007946.2	2691	Epx	eosinophil peroxidase (Epx). mRNA	1.02	606.66	9.8e-16
NM_008176.3	964	Cxcl1	chemokine (C-X-C motif) ligand 1 (Cxcl1). mRNA	2.49	265.64	1.2e-15
NM_001037859.2	3875	Csf1r	colony stimulating factor 1 receptor (Csf1r). mRNA	10.48	-7.53	1.3e-15
NM_013602.3	583	Mt1	metallothionein 1 (Mt1). mRNA	13.38	68.87	4.1e-15
NM_029999.4	3068	Lbh	limb-bud and heart (Lbh). mRNA	12.04	-6.77	4.3e-15
NM_010501.2	1998	Ifit3	interferon-induced protein with tetratricopeptide repeats 3 (Ifit3). mRNA	5.93	20.34	6.6e-15
NM_199221.3	2867	Cd300lb	CD300 molecule like family member B (Cd300lb). transcript variant 1. mRNA	3.52	-25.54	8.2e-15
NM_207624.6	4903	Ace	angiotensin I converting enzyme (peptidyl-dipeptidase A) 1 (Ace). transcript variant 1. mRNA	3.07	-17.92	1.3e-14
NM_020557.4	3215	Cmpk2	cytidine monophosphate (UMP-CMP) kinase 2. mitochondrial (Cmpk2). mRNA; nuclear gene for mitochondrial product	4.93	25.07	1.4e-14
NM_001159394.1	3625	Nfkbiz	nuclear factor of kappa light polypeptide gene enhancer in B cells inhibitor. zeta (Nfkbiz). transcript variant 2. mRNA	15.34	8.32	2e-14
NM_001177352.1	2399	Myc	myelocytomatosis oncogene (Myc). transcript variant 1. mRNA	5.73	8.7	4e-14
NM_001355757.1	2102	Irgm1	immunity-related GTPase family M member 1 (Irgm1). transcript variant 2. mRNA	9.12	11.95	5.3e-14
NM_021394.2	1988	Zbp1	Z-DNA binding protein 1 (Zbp1). transcript variant 1. mRNA	8.58	10.37	6.3e-14
NM_001168295.1	2042	Serpina3f	serine (or cysteine) peptidase inhibitor. clade A. member 3F (Serpina3f). transcript variant 3. mRNA	4.06	19.87	6.3e-14
NM_010927.4	4164	Nos2	nitric oxide synthase 2. inducible (Nos2). transcript variant 1. mRNA	1.31	5171.33	6.3e-14
NM_001039646.2	3528	Gbp10	guanylate-binding protein 10 (Gbp10). mRNA	2.66	16.25	8.7e-14
NM_010849.4	2399	Myc	myelocytomatosis oncogene (Myc). transcript variant 1. mRNA	5.57	8.23	8.9e-14
NM_001252601.1	1780	Irf7	interferon regulatory factor 7 (Irf7). transcript variant 3. mRNA	9.09	9.23	1.7e-13
NM_009369.5	2715	Tgfbi	transforming growth factor. beta induced (Tgfbi). transcript variant 1. mRNA	9.67	-9.59	2.9e-13
NM_010104.4	2143	Edn1	endothelin 1 (Edn1). mRNA	0.71	150.39	5.7e-13
XR_004939222.1	11037	Igsf5	immunoglobulin superfamily. member 5 (Igsf5). transcript variant X2. misc_RNA	1.13	109.14	6.7e-13
NM_001353612.1	1920	Serpina3g	serine (or cysteine) peptidase inhibitor. clade A. member 3G (Serpina3g). transcript variant 2. mRNA	8.43	15.63	6.7e-13
NM_001372436.1	3230	Ifi206	interferon activated gene 206 (Ifi206). transcript variant 1. mRNA	0.54	348.33	7.1e-13
NM_027835.3	5519	Ifih1	interferon induced with helicase C domain 1 (Ifih1). transcript variant 1. mRNA	2.23	13.65	7.5e-13
XM_006521487.4	2915	Krt80	keratin 80 (Krt80). transcript variant X1. mRNA	2.2	-14.97	8.2e-13
NM_145437.2	2440	Cd300ld	CD300 molecule like family member d (Cd300ld). mRNA	5.42	-9.1	2.3e-12
NM_172612.3	2203	Rnd1	Rho family GTPase 1 (Rnd1). mRNA	4.33	10.53	3.5e-12
NM_001039530.3	7251	Parp14	poly (ADP-ribose) polymerase family. member 14 (Parp14). mRNA	8.24	6.95	3.5e-12
NM_008367.3	4428	Il2ra	interleukin 2 receptor. alpha chain (Il2ra). mRNA	2.22	11.3	3.7e-12
NM_183319.3	3925	Xkrx	X-linked Kx blood group related. X-linked (Xkrx). transcript variant 1. mRNA	1.03	-57.36	4.1e-12
XM_006523582.4	2486	Daxx	Fas death domain-associated protein (Daxx). transcript variant X2. mRNA	6.39	31.23	5.7e-12
NM_026976.3	1491	Fcmr	Fc fragment of IgM receptor (Fcmr). mRNA	20.22	-7	7.3e-12
NM_194336.2	4329	Gbp6	guanylate binding protein 6 (Gbp6). mRNA	2.46	10.45	8.2e-12
NM_009896.2	1220	Socs1	suppressor of cytokine signaling 1 (Socs1). transcript variant 2. mRNA	2.62	87.92	1e-11
XM_036154935.1	5091	LOC118567641	uncharacterized LOC118567641 (LOC118567641). partial mRNA	3.66	7.36	1.4e-11
NM_030150.2	2427	Dhx58	DEXH (Asp-Glu-X-His) box polypeptide 58 (Dhx58). mRNA	4.19	9.81	1.4e-11
NM_008620.4	4509	Gbp4	guanylate binding protein 4 (Gbp4). transcript variant 2. mRNA	8.66	7.05	1.5e-11
NM_001159395.1	3507	Nfkbiz	nuclear factor of kappa light polypeptide gene enhancer in B cells inhibitor. zeta (Nfkbiz). transcript variant 3. mRNA	5.15	50.45	2.7e-11
NM_026438.4	1292	Ppa1	pyrophosphatase (inorganic) 1 (Ppa1). mRNA	4.81	13.2	5.3e-11
NR_132130.1	2279	Clec7a	C-type lectin domain family 7. member a (Clec7a). transcript variant 1. non-coding. non-coding RNA	7.4	-17.89	6e-11
NM_176912.5	3520	C5ar2	complement component 5a receptor 2 (C5ar2). transcript variant 1. mRNA	0.77	-616.61	6e-11
NM_016850.3	1876	Irf7	interferon regulatory factor 7 (Irf7). transcript variant 1. mRNA	13.26	7.88	6e-11
NM_001173459.2	1456	Sirpb1c	signal-regulatory protein beta 1C (Sirpb1c). mRNA	8.79	-9.49	6.7e-11
NM_008330.2	1742	Ifi47	interferon gamma inducible protein 47 (Ifi47). transcript variant 1. mRNA	13.62	15.41	9.2e-11
NM_001302376.1	1871	Ccrl2	chemokine (C-C motif) receptor-like 2 (Ccrl2). transcript variant 2. mRNA	4.81	26.21	9.5e-11
NM_013671.3	3824	Sod2	superoxide dismutase 2. mitochondrial (Sod2). mRNA; nuclear gene for mitochondrial product	10.69	4.93	1e-10
NM_011163.4	4343	Eif2ak2	eukaryotic translation initiation factor 2-alpha kinase 2 (Eif2ak2). mRNA	2.25	10.54	1.1e-10
NM_008518.2	1122	Ltb	lymphotoxin B (Ltb). mRNA	29.2	-5.31	1.2e-10
NM_008339.3	1249	Cd79b	CD79B antigen (Cd79b). transcript variant 1. mRNA	49.62	-5.78	1.3e-10
NM_001167906.2	4636	Cd101	CD101 antigen (Cd101). mRNA	2.56	-17.34	1.5e-10
NM_011315.3	531	Saa3	serum amyloid A 3 (Saa3). mRNA	74.88	40.55	1.6e-10
NM_021524.2	4547	Nampt	nicotinamide phosphoribosyltransferase (Nampt). mRNA	3.65	6.67	1.6e-10
NM_009987.4	3753	Cx3cr1	chemokine (C-X3-C motif) receptor 1 (Cx3cr1). mRNA	3.51	-8.67	1.6e-10
NM_001040005.3	16751	Rnf213	ring finger protein 213 (Rnf213). mRNA	3.83	7.98	1.8e-10
NM_009971.1	1363	Csf3	colony stimulating factor 3 (granulocyte) (Csf3). mRNA	1.55	132.66	1.8e-10
XR_004937230.1	900	LOC118567924	uncharacterized LOC118567924 (LOC118567924). ncRNA	8.03	12.79	2.1e-10
NM_203320.3	1018	Cxcl3	chemokine (C-X-C motif) ligand 3 (Cxcl3). mRNA	3.38	32.82	3e-10
NM_009061.4	3009	Rgs2	regulator of G-protein signaling 2 (Rgs2). mRNA	6.57	-5.94	3e-10
NM_001145164.1	2816	Tgtp2	T cell specific GTPase 2 (Tgtp2). mRNA	7.48	7.7	3.1e-10
NM_001001495.2	3769	Tnip3	TNFAIP3 interacting protein 3 (Tnip3). mRNA	0.78	27.49	4e-10
NM_033601.3	1835	Bcl3	B cell leukemia/lymphoma 3 (Bcl3). mRNA	14.91	5.6	4e-10
NM_011498.4	3113	Bhlhe40	basic helix-loop-helix family. member e40 (Bhlhe40). mRNA	6.87	4.99	4.1e-10
NM_008198.2	2767	Cfb	complement factor B (Cfb). transcript variant 1. mRNA	3.33	19.81	4.7e-10
NR_155430.1	2765	B230303A05Rik	RIKEN cDNA B230303A05 gene (B230303A05Rik). non-coding RNA	0.81	79.27	5.2e-10
NM_008512.2	14907	Lrp1	low density lipoprotein receptor-related protein 1 (Lrp1). mRNA	2.01	-5.75	5.5e-10
NM_153159.2	2805	Zc3h12a	zinc finger CCCH type containing 12A (Zc3h12a). mRNA	10.02	5.07	5.8e-10
NM_001311108.1	2860	Tmcc2	transmembrane and coiled-coil domains 2 (Tmcc2). transcript variant 3. mRNA	14.86	6.22	7.2e-10
NM_011579.3	2809	Tgtp1	T cell specific GTPase 1 (Tgtp1). mRNA	6.6	7.92	9.2e-10
NM_023380.2	1845	Samsn1	SAM domain. SH3 domain and nuclear localization signals. 1 (Samsn1). mRNA	15.79	5.62	9.4e-10
NM_022415.3	3647	Ptges	prostaglandin E synthase (Ptges). mRNA	0.61	49.26	9.9e-10
XM_006500187.5	4539	Ifih1	interferon induced with helicase C domain 1 (Ifih1). transcript variant X1. mRNA	0.72	90.06	1e-09
NM_133746.5	2049	Calhm2	calcium homeostasis modulator family member 2 (Calhm2). mRNA	2.1	-15.59	1.4e-09
XM_006499466.4	3361	Ypel4	yippee like 4 (Ypel4). transcript variant X1. mRNA	1.64	98.17	1.5e-09
NM_134158.1	1139	Cd300c2	CD300C molecule 2 (Cd300c2). mRNA	5.62	-16.91	2e-09
NM_001033764.3	4331	4931408C20Rik	RIKEN cDNA 4931408C20 gene (4931408C20Rik). mRNA	0.43	-96.38	2.2e-09
NM_175511.4	4011	Fam78a	family with sequence similarity 78. member A (Fam78a). transcript variant 1. mRNA	3.75	-5.71	2.5e-09
NM_010554.4	1974	Il1a	interleukin 1 alpha (Il1a). mRNA	0.72	36.3	2.6e-09
NM_023141.2	3268	Tor3a	torsin family 3. member A (Tor3a). mRNA	3.64	7.49	2.8e-09
NM_001044740.2	7720	Slc7a2	solute carrier family 7 (cationic amino acid transporter. y+ system). member 2 (Slc7a2). transcript variant 2. mRNA	0.28	2434.43	4.6e-09
NR_033450.1	2051	Serpina3h	serine (or cysteine) peptidase inhibitor. clade A. member 3H (Serpina3h). non-coding RNA	0.86	63.11	5e-09
NM_001166402.1	4352	Tnfaip3	tumor necrosis factor. alpha-induced protein 3 (Tnfaip3). transcript variant 2. mRNA	11.33	20.74	5.2e-09
NM_053190.2	2512	S1pr5	sphingosine-1-phosphate receptor 5 (S1pr5). mRNA	1.67	-14.48	5.9e-09
NM_001077508.1	1999	Tnfrsf9	tumor necrosis factor receptor superfamily. member 9 (Tnfrsf9). transcript variant 2. mRNA	1.25	29.02	6.9e-09
NM_001139519.1	781	Zbp1	Z-DNA binding protein 1 (Zbp1). transcript variant 2. mRNA	6.14	12.74	7.4e-09
NM_025992.2	5279	Herc6	hect domain and RLD 6 (Herc6). mRNA	2.08	7.58	7.7e-09
NM_011333.3	806	Ccl2	chemokine (C-C motif) ligand 2 (Ccl2). mRNA	1.3	86.03	7.7e-09
NM_016917.2	3380	Slc40a1	solute carrier family 40 (iron-regulated transporter). member 1 (Slc40a1). mRNA	4.07	-16.54	7.8e-09
NM_001093765.1	2966	Myadm	myeloid-associated differentiation marker (Myadm). transcript variant 2. mRNA	3.49	-7.55	8.3e-09
NR_132106.1	1264	Mir155hg	Mir155 host gene (non-protein coding) (Mir155hg). long non-coding RNA	1.55	28.61	8.5e-09
NM_028773.4	2692	Sash3	SAM and SH3 domain containing 3 (Sash3). transcript variant 2. mRNA	7.6	-4.42	8.5e-09
NM_028758.2	4891	Gga2	golgi associated. gamma adaptin ear containing. ARF binding protein 2 (Gga2). mRNA	3.08	-6.59	8.5e-09
XM_006523944.2	19205	Slc8a1	solute carrier family 8 (sodium/calcium exchanger). member 1 (Slc8a1). transcript variant X13. mRNA	0.09	-150.51	8.5e-09
XM_017320397.3	4734	Arhgef10l	Rho guanine nucleotide exchange factor (GEF) 10-like (Arhgef10l). transcript variant X11. mRNA	0.63	-41.97	9.1e-09
NM_013517.4	2241	Fcer2a	Fc receptor. IgE. low affinity II. alpha polypeptide (Fcer2a). transcript variant 1. mRNA	12.31	-11.01	9.8e-09
XM_036154585.1	3762	Ccr2	chemokine (C-C motif) receptor 2 (Ccr2). transcript variant X1. mRNA	6.57	-20.43	1.1e-08
XM_006507162.4	2137	AI467606	expressed sequence AI467606 (AI467606). transcript variant X1. mRNA	6.87	-9.58	1.1e-08
XM_006522928.5	2942	Itgb2l	integrin beta 2-like (Itgb2l). transcript variant X1. mRNA	2.54	141.07	1.1e-08
XM_006532660.4	3995	Slfn4	schlafen 4 (Slfn4). transcript variant X2. mRNA	8.27	18.86	1.1e-08
XM_006516626.5	2549	Serpinb9	serine (or cysteine) peptidase inhibitor. clade B. member 9 (Serpinb9). transcript variant X1. mRNA	3.37	9.2	1.2e-08
XM_006511052.5	1629	Plscr1	phospholipid scramblase 1 (Plscr1). transcript variant X1. mRNA	7.6	12.27	1.2e-08
NM_008326.2	2321	Irgm1	immunity-related GTPase family M member 1 (Irgm1). transcript variant 1. mRNA	4.65	8.59	1.4e-08
NM_053111.2	738	Ear6	eosinophil-associated. ribonuclease A family. member 6 (Ear6). mRNA	2.85	43.8	1.5e-08
NM_007695.3	1704	Chil1	chitinase-like 1 (Chil1). transcript variant 1. mRNA	19.43	6.69	1.5e-08
NM_009895.4	3014	Cish	cytokine inducible SH2-containing protein (Cish). transcript variant 1. mRNA	1.07	16.56	1.5e-08
NM_021334.3	4043	Itgax	integrin alpha X (Itgax). transcript variant 1. mRNA	2.08	-8.16	2e-08
XM_036156602.1	7214	Abca9	ATP-binding cassette. sub-family A (ABC1). member 9 (Abca9). transcript variant X1. mRNA	0.44	-29.19	2e-08
NM_010824.2	2570	Mpo	myeloperoxidase (Mpo). mRNA	0.61	46.89	2.2e-08
XM_036160108.1	1410	Tmem45a2	transmembrane protein 45A2 (Tmem45a2). transcript variant X1. mRNA	1.26	106.15	2.3e-08
XM_006511635.3	3101	Cish	cytokine inducible SH2-containing protein (Cish). transcript variant X1. mRNA	1.95	9.08	2.4e-08
NM_001372437.1	3376	Ifi206	interferon activated gene 206 (Ifi206). transcript variant 2. mRNA	1.22	11.61	3e-08
NM_172615.4	5316	Rubcn	RUN domain and cysteine-rich domain containing. Beclin 1-interacting protein (Rubcn). transcript variant 2. mRNA	1.21	-22.62	3.5e-08
NM_001177354.1	2396	Myc	myelocytomatosis oncogene (Myc). transcript variant 2. mRNA	1.47	11.54	3.8e-08
NM_181545.4	4011	Slfn8	schlafen 8 (Slfn8). transcript variant 1. mRNA	6.47	4.48	3.8e-08
XM_030245596.2	2655	Irgm1	immunity-related GTPase family M member 1 (Irgm1). transcript variant X1. mRNA	3.2	8.5	3.9e-08
NM_008654.2	2345	Ppp1r15a	protein phosphatase 1. regulatory subunit 15A (Ppp1r15a). mRNA	12.06	4.09	4.1e-08
NM_017466.5	2121	Ccrl2	chemokine (C-C motif) receptor-like 2 (Ccrl2). transcript variant 1. mRNA	2.88	20.77	4.1e-08
XR_001784699.2	1505	Oas1a	2'-5' oligoadenylate synthetase 1A (Oas1a). transcript variant X2. misc_RNA	1.97	17.8	4.1e-08
XM_030249337.2	3031	Parp9	poly (ADP-ribose) polymerase family. member 9 (Parp9). transcript variant X3. mRNA	4.14	7.06	4.9e-08
NM_001135115.1	2702	Gm12250	predicted gene 12250 (Gm12250). mRNA	5.61	7.06	5e-08
NM_009259.5	3751	Spn	sialophorin (Spn). transcript variant 1. mRNA	5.13	-7.56	5e-08
XM_011246978.4	3173	Iigp1	interferon inducible GTPase 1 (Iigp1). transcript variant X4. mRNA	0.44	104.38	5e-08
NM_007707.3	2742	Socs3	suppressor of cytokine signaling 3 (Socs3). mRNA	46.67	5.98	5.1e-08
NM_138956.3	3425	Rassf3	Ras association (RalGDS/AF-6) domain family member 3 (Rassf3). mRNA	4.43	-9.58	5.2e-08
XR_004942512.1	5156	Gbp9	guanylate-binding protein 9 (Gbp9). transcript variant X4. misc_RNA	6.04	4.89	5.3e-08
XM_011250822.3	4210	Furin	furin (paired basic amino acid cleaving enzyme) (Furin). transcript variant X5. mRNA	0.43	1134.46	5.3e-08
NM_001177785.1	5285	Cd44	CD44 antigen (Cd44). transcript variant 4. mRNA	0.32	1411.91	5.4e-08
NM_001360089.1	3212	Il16	interleukin 16 (Il16). transcript variant 4. mRNA	13.02	-3.85	5.8e-08
XM_030249257.2	1154	Rtp4	receptor transporter protein 4 (Rtp4). transcript variant X4. mRNA	5.47	10.78	5.9e-08
NM_013566.2	2696	Itgb7	integrin beta 7 (Itgb7). mRNA	12.61	-4.78	6.1e-08
NM_007746.2	2507	Map3k8	mitogen-activated protein kinase kinase kinase 8 (Map3k8). transcript variant 1. mRNA	6.2	5.1	7.4e-08
NM_009910.3	1609	Cxcr3	chemokine (C-X-C motif) receptor 3 (Cxcr3). mRNA	1.88	-19.55	7.9e-08
NM_019963.2	4476	Stat2	signal transducer and activator of transcription 2 (Stat2). mRNA	8.17	4.13	1e-07
NM_172689.3	4943	Ddx58	DEAD/H box helicase 58 (Ddx58). mRNA	5.69	4.59	1.1e-07
XM_030248984.2	6955	Cd47	CD47 antigen (Rh-related antigen. integrin-associated signal transducer) (Cd47). transcript variant X5. mRNA	0.73	96.78	1.1e-07
XM_017319945.3	3452	Csf3r	colony stimulating factor 3 receptor (granulocyte) (Csf3r). transcript variant X14. mRNA	7.67	-6.86	1.3e-07
NM_015783.3	756	Isg15	ISG15 ubiquitin-like modifier (Isg15). mRNA	49.13	6.52	1.3e-07
XM_011240712.4	7416	Arap2	ArfGAP with RhoGAP domain. ankyrin repeat and PH domain 2 (Arap2). transcript variant X1. mRNA	0.28	935.22	1.4e-07
NM_001370610.1	1537	Samhd1	SAM domain and HD domain. 1 (Samhd1). transcript variant 3. mRNA	7.11	6.98	1.4e-07
NM_009892.3	1539	Chil3	chitinase-like 3 (Chil3). mRNA	21.47	6.31	1.8e-07
XM_006533235.5	10874	Slfn9	schlafen 9 (Slfn9). transcript variant X1. mRNA	1.53	4.35	1.9e-07
XM_006512706.5	12409	Utrn	utrophin (Utrn). transcript variant X1. mRNA	0.43	860.34	1.9e-07
XM_006507522.5	3880	Spn	sialophorin (Spn). transcript variant X2. mRNA	2.29	-6.49	1.9e-07
NM_026268.3	2814	Dusp6	dual specificity phosphatase 6 (Dusp6). mRNA	4.97	-5.18	2e-07
NM_024495.5	2299	Car13	carbonic anhydrase 13 (Car13). mRNA	0.4	37.12	2e-07
XM_006534630.5	17027	Rnf213	ring finger protein 213 (Rnf213). transcript variant X1. mRNA	0.6	40.76	2e-07
NM_133662.2	1090	Ier3	immediate early response 3 (Ier3). mRNA	5.21	10.05	2.1e-07
NM_009841.4	1681	Cd14	CD14 antigen (Cd14). mRNA	37.36	7.91	2.1e-07
NM_001110251.1	1553	Hmbs	hydroxymethylbilane synthase (Hmbs). transcript variant 2. mRNA	9.69	4.7	2.2e-07
NM_010260.1	2471	Gbp2	guanylate binding protein 2 (Gbp2). mRNA	17.64	8.37	2.2e-07
NM_001093764.1	3017	Myadm	myeloid-associated differentiation marker (Myadm). transcript variant 1. mRNA	0.65	-43.33	2.5e-07
NM_008871.2	3024	Serpine1	serine (or cysteine) peptidase inhibitor. clade E. member 1 (Serpine1). mRNA	0.9	32.64	2.5e-07
NM_145226.2	4718	Oas3	2'-5' oligoadenylate synthetase 3 (Oas3). mRNA	3.36	8.15	2.5e-07
NM_008329.2	2302	Ifi204	interferon activated gene 204 (Ifi204). mRNA	6.68	4.86	2.5e-07
XM_017317770.3	5965	Gm2808	predicted gene 2808 (Gm2808). mRNA	3.96	5.98	2.7e-07
XR_881738.4	4899	Nlrp12	NLR family. pyrin domain containing 12 (Nlrp12). transcript variant X1. misc_RNA	0.52	-63.81	2.7e-07
XM_006512702.4	4347	Tnfaip3	tumor necrosis factor. alpha-induced protein 3 (Tnfaip3). transcript variant X1. mRNA	6	11.88	3e-07
NM_139138.3	3491	Adgre4	adhesion G protein-coupled receptor E4 (Adgre4). mRNA	3.11	-5.36	3e-07
NM_009099.2	3771	Trim30a	tripartite motif-containing 30A (Trim30a). transcript variant 1. mRNA	4.08	5.34	3.4e-07
NM_001290469.1	3609	Atp1a3	ATPase. Na+/K+ transporting. alpha 3 polypeptide (Atp1a3). transcript variant 2. mRNA	4.07	-9.32	3.4e-07
NM_001159402.1	1269	Upp1	uridine phosphorylase 1 (Upp1). transcript variant 2. mRNA	3.38	16.71	3.4e-07
NR_038116.1	1605	Cxcl11	chemokine (C-X-C motif) ligand 11 (Cxcl11). transcript variant 1. non-coding. non-coding RNA	0.45	47.31	3.5e-07
NM_016767.2	904	Batf	basic leucine zipper transcription factor. ATF-like (Batf). mRNA	8.74	5.86	4e-07
NM_001013371.2	5181	Dtx3l	deltex 3-like. E3 ubiquitin ligase (Dtx3l). mRNA	5.61	4	4.9e-07
NM_001166432.1	2288	Hnrnpf	heterogeneous nuclear ribonucleoprotein F (Hnrnpf). transcript variant 7. mRNA	3.41	-10.44	7.3e-07
NM_001285893.1	5027	Vps8	VPS8 CORVET complex subunit (Vps8). transcript variant 1. mRNA	0.55	-31.34	7.6e-07
NM_008608.4	3801	Mmp14	matrix metallopeptidase 14 (membrane-inserted) (Mmp14). mRNA	0.4	21.92	7.8e-07
NM_027320.4	1360	Ifi35	interferon-induced protein 35 (Ifi35). mRNA	8.1	4.94	8e-07
NM_010479.2	2798	Hspa1a	heat shock protein 1A (Hspa1a). mRNA	0.58	21.4	8.6e-07
NM_019440.3	3537	Irgm2	immunity-related GTPase family M member 2 (Irgm2). mRNA	5.35	5.47	1e-06
NM_030258.5	4099	Gpr146	G protein-coupled receptor 146 (Gpr146). transcript variant 1. mRNA	0.73	895.78	1e-06
XM_006530295.5	991	Oasl1	2'-5' oligoadenylate synthetase-like 1 (Oasl1). transcript variant X1. mRNA	1.11	37.76	1e-06
NM_001159301.1	1493	Lgals9	lectin. galactose binding. soluble 9 (Lgals9). transcript variant 2. mRNA	14.93	4.23	1.2e-06
NM_001374654.1	3201	Eif1a	eukaryotic translation initiation factor 1A (Eif1a). transcript variant 1. mRNA	0.51	36.13	1.2e-06
XM_006498013.3	2452	Cytip	cytohesin 1 interacting protein (Cytip). transcript variant X2. mRNA	10.49	22.65	1.4e-06
XM_017321537.2	4530	Frmd4b	FERM domain containing 4B (Frmd4b). transcript variant X2. mRNA	0.36	-677.12	1.4e-06
XM_036161447.1	3731	Ifit2	interferon-induced protein with tetratricopeptide repeats 2 (Ifit2). transcript variant X2. mRNA	3.04	6.63	1.5e-06
NM_011580.4	5865	Thbs1	thrombospondin 1 (Thbs1). transcript variant 1. mRNA	34.31	4.37	1.5e-06
XM_006523676.5	1672	H2-K1	histocompatibility 2. K1. K region (H2-K1). transcript variant X5. mRNA	4.6	128.97	1.6e-06
XM_006513495.3	4938	Sbno2	strawberry notch 2 (Sbno2). transcript variant X4. mRNA	0.41	-662.44	1.6e-06
NM_001146120.1	2667	Psap	prosaposin (Psap). transcript variant 1. mRNA	62.81	-3.48	1.6e-06
XM_036156421.1	8046	Per1	period circadian clock 1 (Per1). transcript variant X5. mRNA	0.57	63.5	1.7e-06
NM_001378693.1	4605	Trim30c	tripartite motif-containing 30C (Trim30c). transcript variant 2. mRNA	0.76	20.71	1.7e-06
NM_028770.3	3067	Krt80	keratin 80 (Krt80). mRNA	0.69	-38.23	1.8e-06
XM_006497619.3	3179	Abi1	abl-interactor 1 (Abi1). transcript variant X1. mRNA	0.83	-42.74	1.8e-06
NM_010171.3	1876	F3	coagulation factor III (F3). mRNA	0.52	46.86	1.8e-06
NM_010090.2	1630	Dusp2	dual specificity phosphatase 2 (Dusp2). mRNA	11.81	4.01	1.9e-06
NM_021893.3	3653	Cd274	CD274 antigen (Cd274). mRNA	3.47	31.39	2.1e-06
NM_138606.2	2054	Pim2	proviral integration site 2 (Pim2). mRNA	8.86	3.79	2.3e-06
NM_019456.2	2540	Apbb1ip	amyloid beta (A4) precursor protein-binding. family B. member 1 interacting protein (Apbb1ip). mRNA	8.61	-3.42	2.4e-06
XM_011246979.4	3160	Iigp1	interferon inducible GTPase 1 (Iigp1). transcript variant X3. mRNA	0.52	85.58	2.5e-06
NM_010478.2	2810	Hspa1b	heat shock protein 1B (Hspa1b). mRNA	0.7	15.25	2.5e-06
NM_182650.4	2145	Hnrnpa2b1	heterogeneous nuclear ribonucleoprotein A2/B1 (Hnrnpa2b1). transcript variant 2. mRNA	0.31	639.96	2.7e-06
NM_008655.1	1305	Gadd45b	growth arrest and DNA-damage-inducible 45 beta (Gadd45b). mRNA	8.12	4.7	2.8e-06
NM_009256.3	3397	Serpinb9	serine (or cysteine) peptidase inhibitor. clade B. member 9 (Serpinb9). mRNA	3.28	4.69	2.8e-06
NM_011427.3	1633	Snai1	snail family zinc finger 1 (Snai1). mRNA	1.94	20.8	3.1e-06
XM_036160364.1	4245	Sik1	salt inducible kinase 1 (Sik1). transcript variant X2. mRNA	0.33	868.36	3.5e-06
NM_001146005.2	3427	C5ar2	complement component 5a receptor 2 (C5ar2). transcript variant 2. mRNA	0.16	101.23	3.5e-06
NM_010498.3	4988	Ids	iduronate 2-sulfatase (Ids). mRNA	0.37	-557	3.5e-06
NM_001291894.1	1502	Lilrb4a	leukocyte immunoglobulin-like receptor. subfamily B. member 4A (Lilrb4a). transcript variant 2. mRNA	12.91	4.67	3.6e-06
NM_010276.4	2257	Gem	GTP binding protein (gene overexpressed in skeletal muscle) (Gem). mRNA	2.71	6.36	3.6e-06
NM_001177353.1	2396	Myc	myelocytomatosis oncogene (Myc). transcript variant 2. mRNA	1.42	8.87	3.6e-06
NM_008077.5	3283	Gad1	glutamate decarboxylase 1 (Gad1). transcript variant 1. mRNA	4.48	-4.9	3.6e-06
NM_001357562.1	3029	Csrnp1	cysteine-serine-rich nuclear protein 1 (Csrnp1). transcript variant 4. mRNA	4.52	4.74	3.7e-06
NM_008245.3	1771	Hhex	hematopoietically expressed homeobox (Hhex). mRNA	3.69	-5.89	3.8e-06
NM_015743.3	5573	Nr4a3	nuclear receptor subfamily 4. group A. member 3 (Nr4a3). transcript variant 1. mRNA	0.16	677.92	3.8e-06
NM_009019.2	6669	Rag1	recombination activating 1 (Rag1). mRNA	0.24	19.85	3.8e-06
NM_001164403.1	4096	Ptpro	protein tyrosine phosphatase. receptor type. O (Ptpro). transcript variant 4. mRNA	0.78	-17.3	4.2e-06
XM_030253414.2	3497	Fam214b	family with sequence similarity 214. member B (Fam214b). transcript variant X8. mRNA	0.16	81.54	4.2e-06
NM_023734.3	2245	Pi16	peptidase inhibitor 16 (Pi16). mRNA	3.85	-7.25	4.3e-06
NM_001162904.1	3161	Mdm1	transformed mouse 3T3 cell double minute 1 (Mdm1). transcript variant 3. mRNA	0.29	-179.81	4.3e-06
NM_001351947.1	2768	Olfm4	olfactomedin 4 (Olfm4). mRNA	5.53	8.4	4.3e-06
XM_011242654.3	8063	Dennd4a	DENN/MADD domain containing 4A (Dennd4a). transcript variant X10. mRNA	1.7	9.43	4.4e-06
NM_001271411.1	3962	Nfam1	Nfat activating molecule with ITAM motif 1 (Nfam1). transcript variant 1. mRNA	7.78	-4.06	4.4e-06
NM_009850.2	1023	Cd3g	CD3 antigen. gamma polypeptide (Cd3g). mRNA	13.18	-5.08	4.5e-06
XM_006526694.2	6114	Gpam	glycerol-3-phosphate acyltransferase. mitochondrial (Gpam). transcript variant X5. mRNA	1.13	641.04	4.7e-06
NM_008599.4	2905	Cxcl9	chemokine (C-X-C motif) ligand 9 (Cxcl9). mRNA	0.32	35.99	4.8e-06
NM_178729.4	2421	Fbxl5	F-box and leucine-rich repeat protein 5 (Fbxl5). transcript variant 2. mRNA	2.53	11	5.1e-06
NM_001313749.1	2695	Sash3	SAM and SH3 domain containing 3 (Sash3). transcript variant 1. mRNA	5.37	-3.66	5.2e-06
NM_008737.2	5921	Nrp1	neuropilin 1 (Nrp1). transcript variant 1. mRNA	0.26	-517.94	5.2e-06
NM_001360075.1	2643	Gtf2h1	general transcription factor II H. polypeptide 1 (Gtf2h1). transcript variant 3. mRNA	0.22	562.28	5.2e-06
XM_006502713.4	3295	Csf3r	colony stimulating factor 3 receptor (granulocyte) (Csf3r). transcript variant X7. mRNA	8.95	-4.51	5.3e-06
NM_011269.2	2316	Rhag	Rhesus blood group-associated A glycoprotein (Rhag). mRNA	1.27	10.31	5.4e-06
NM_001198787.1	5195	Aatk	apoptosis-associated tyrosine kinase (Aatk). transcript variant 3. mRNA	0.25	-520.09	5.6e-06
XM_036158581.1	1413	Phf11b	PHD finger protein 11B (Phf11b). transcript variant X2. mRNA	0.53	57.95	5.7e-06
XM_006501386.3	8231	Otud7b	OTU domain containing 7B (Otud7b). transcript variant X3. mRNA	0.14	927.72	5.7e-06
NM_001360917.1	2615	Gramd3	GRAM domain containing 3 (Gramd3). transcript variant 1. mRNA	17.24	3.52	5.7e-06
NM_001109756.1	5937	Adcy7	adenylate cyclase 7 (Adcy7). transcript variant 4. mRNA	0.1	782.44	5.8e-06
XM_006505463.3	2274	Cd69	CD69 antigen (Cd69). transcript variant X1. mRNA	2.78	15.47	5.9e-06
NM_054051.1	5068	Pip4k2b	phosphatidylinositol-5-phosphate 4-kinase. type II. beta (Pip4k2b). mRNA	2.19	-4.38	5.9e-06
XR_004940251.1	9943	Helz2	helicase with zinc finger 2. transcriptional coactivator (Helz2). transcript variant X2. misc_RNA	1.51	9.5	6e-06
XM_011247151.3	1963	Ifit3	interferon-induced protein with tetratricopeptide repeats 3 (Ifit3). transcript variant X1. mRNA	1.37	25.33	6.2e-06
XM_030245821.2	5793	Kdm6b	KDM1 lysine (K)-specific demethylase 6B (Kdm6b). transcript variant X6. mRNA	2.32	13.76	6.3e-06
NM_018866.2	1162	Cxcl13	chemokine (C-X-C motif) ligand 13 (Cxcl13). mRNA	1.99	79.32	6.3e-06
NM_021346.2	3921	Zfp318	zinc finger protein 318 (Zfp318). transcript variant 2. mRNA	0.35	-22.34	6.5e-06
XM_017313891.3	4667	Sbno2	strawberry notch 2 (Sbno2). transcript variant X8. mRNA	0.54	652.1	6.7e-06
NM_011809.3	3560	Ets2	E26 avian leukemia oncogene 2. 3' domain (Ets2). mRNA	7.2	4.47	6.9e-06
NM_008987.3	1924	Ptx3	pentraxin related gene (Ptx3). mRNA	0.52	43.89	7.3e-06
NR_152866.1	2857	Hnrnpdl	heterogeneous nuclear ribonucleoprotein D-like (Hnrnpdl). transcript variant 2. non-coding RNA	0.61	-76.46	7.6e-06
NM_172893.3	3322	Parp12	poly (ADP-ribose) polymerase family. member 12 (Parp12). mRNA	1.72	6.93	7.6e-06
NM_015779.2	920	Elane	elastase. neutrophil expressed (Elane). mRNA	0.38	79.91	7.7e-06
NM_001347651.2	2643	Cd300lb	CD300 molecule like family member B (Cd300lb). transcript variant 2. mRNA	1.73	-8.53	8e-06
NM_023118.5	4520	Dab2	disabled 2. mitogen-responsive phosphoprotein (Dab2). transcript variant 1. mRNA	0.17	801.25	8.1e-06
NM_001382848.1	7840	Hip1	huntingtin interacting protein 1 (Hip1). transcript variant 2. mRNA	0.52	-35.77	8.1e-06
NM_001163029.1	2971	Adgre5	adhesion G protein-coupled receptor E5 (Adgre5). transcript variant 2. mRNA	25.83	-3.31	8.7e-06
XM_036157556.1	829	Serpina3i	serine (or cysteine) peptidase inhibitor. clade A. member 3I (Serpina3i). transcript variant X5. mRNA	1.48	17.86	8.7e-06
NM_010548.2	1306	Il10	interleukin 10 (Il10). mRNA	0.45	335.84	8.8e-06
NM_019777.3	3203	Ikbke	inhibitor of kappaB kinase epsilon (Ikbke). mRNA	6.64	3.38	8.9e-06
NM_170758.4	1937	Cd300a	CD300A molecule (Cd300a). transcript variant 1. mRNA	5.83	-4.27	9.6e-06
XM_036165971.1	2595	Scnn1a	sodium channel. nonvoltage-gated 1 alpha (Scnn1a). transcript variant X3. mRNA	1.18	-12.68	9.8e-06
NM_199015.4	2696	Phf11d	PHD finger protein 11D (Phf11d). mRNA	0.82	10.33	1e-05
NM_010102.2	2393	S1pr4	sphingosine-1-phosphate receptor 4 (S1pr4). mRNA	4.79	-4.36	1e-05
XM_036156347.1	1764	Irf1	interferon regulatory factor 1 (Irf1). transcript variant X1. mRNA	9.04	27.41	1e-05
XM_006497814.3	7964	Sptan1	spectrin alpha. non-erythrocytic 1 (Sptan1). transcript variant X5. mRNA	0.1	200.7	1.1e-05
NM_008390.2	2151	Irf1	interferon regulatory factor 1 (Irf1). transcript variant 1. mRNA	28.97	3.37	1.1e-05
XM_006508478.1	2551	Dhcr7	7-dehydrocholesterol reductase (Dhcr7). transcript variant X4. mRNA	0.53	-34.67	1.1e-05
NM_011027.4	4920	P2rx7	purinergic receptor P2X. ligand-gated ion channel. 7 (P2rx7). transcript variant 1. mRNA	0.24	-458.44	1.2e-05
NM_053262.3	1699	Hsd17b11	hydroxysteroid (17-beta) dehydrogenase 11 (Hsd17b11). mRNA	4.1	-5	1.2e-05
XM_006499427.4	5704	Zfp217	zinc finger protein 217 (Zfp217). transcript variant X1. mRNA	0.36	-531.54	1.3e-05
NM_009373.3	3549	Tgm2	transglutaminase 2. C polypeptide (Tgm2). mRNA	5.65	3.62	1.3e-05
NM_001291058.1	1263	Cd68	CD68 antigen (Cd68). transcript variant 1. mRNA	6.57	-4.76	1.3e-05
NM_013470.2	1619	Anxa3	annexin A3 (Anxa3). mRNA	3.34	6.72	1.3e-05
XM_011242931.3	5363	Ptpn23	protein tyrosine phosphatase. non-receptor type 23 (Ptpn23). transcript variant X2. mRNA	0.52	444.37	1.4e-05
NM_001276486.1	5435	Dag1	dystroglycan 1 (Dag1). transcript variant 6. mRNA	0.3	-494.95	1.4e-05
NM_011947.4	4686	Map3k3	mitogen-activated protein kinase kinase kinase 3 (Map3k3). mRNA	4.77	-3.78	1.4e-05
XM_036157155.1	5028	Rnf144a	ring finger protein 144A (Rnf144a). transcript variant X5. mRNA	0.36	-631.48	1.4e-05
XM_006504690.5	10732	Tnrc18	trinucleotide repeat containing 18 (Tnrc18). transcript variant X6. mRNA	0.17	-36.17	1.4e-05
NM_008510.2	537	Xcl1	chemokine (C motif) ligand 1 (Xcl1). mRNA	4.33	11.92	1.4e-05
NM_001168512.1	2059	Ffar2	free fatty acid receptor 2 (Ffar2). transcript variant 5. mRNA	0.18	351.16	1.4e-05
NM_009917.5	2926	Ccr5	chemokine (C-C motif) receptor 5 (Ccr5). mRNA	2.34	5.74	1.5e-05
NM_009183.2	5437	St8sia4	ST8 alpha-N-acetyl-neuraminide alpha-2.8-sialyltransferase 4 (St8sia4). transcript variant 1. mRNA	2.78	-4.84	1.5e-05
NM_053214.2	3833	Myo1f	myosin IF (Myo1f). mRNA	9.92	-4.35	1.5e-05
NM_018738.4	2064	Igtp	interferon gamma induced GTPase (Igtp). mRNA	31.85	3.69	1.5e-05
XM_006501283.5	9086	Tet2	tet methylcytosine dioxygenase 2 (Tet2). transcript variant X3. mRNA	1.59	13.66	1.5e-05
NM_001277258.1	3571	Acvrl1	activin A receptor. type II-like 1 (Acvrl1). transcript variant 4. mRNA	0.12	466.51	1.5e-05
NM_021792.5	3068	Iigp1	interferon inducible GTPase 1 (Iigp1). transcript variant 1. mRNA	0.98	39.2	1.5e-05
NM_001005865.3	4169	Mtus1	mitochondrial tumor suppressor 1 (Mtus1). transcript variant 4. mRNA	2.18	-7.67	1.6e-05
XM_036156357.1	1872	Ctla4	cytotoxic T-lymphocyte-associated protein 4 (Ctla4). transcript variant X1. mRNA	3.71	26.24	1.6e-05
NM_008443.4	5450	Kif3a	kinesin family member 3A (Kif3a). transcript variant 1. mRNA	0.13	87.25	1.6e-05
NM_016787.4	5806	Bnip2	BCL2/adenovirus E1B interacting protein 2 (Bnip2). transcript variant beta. mRNA	0.98	423.5	1.6e-05
NM_028639.3	4615	Ttc7	tetratricopeptide repeat domain 7 (Ttc7). mRNA	5.16	-5.3	1.6e-05
NM_175116.4	2468	Lpar6	lysophosphatidic acid receptor 6 (Lpar6). mRNA	2.07	-5.75	1.7e-05
NM_001004174.2	640	AA467197	expressed sequence AA467197 (AA467197). mRNA	3.39	12.71	1.8e-05
XM_036163745.1	9919	Kif1b	kinesin family member 1B (Kif1b). transcript variant X10. mRNA	0.13	535.28	1.8e-05
NM_001163470.1	2498	Trafd1	TRAF type zinc finger domain containing 1 (Trafd1). transcript variant 1. mRNA	6.65	4.23	1.8e-05
NM_001025245.1	4820	Mbp	myelin basic protein (Mbp). transcript variant 8. mRNA	5.7	-3.1	1.9e-05
NM_001163575.1	3307	Parp10	poly (ADP-ribose) polymerase family. member 10 (Parp10). transcript variant 1. mRNA	4.65	3.78	2e-05
NM_016914.2	949	Prg3	proteoglycan 3 (Prg3). mRNA	0.63	67.37	2e-05
XM_011250548.4	2149	Ffar2	free fatty acid receptor 2 (Ffar2). transcript variant X1. mRNA	0.21	82.66	2e-05
XM_036153639.1	6049	Trak2	trafficking protein. kinesin binding 2 (Trak2). transcript variant X9. mRNA	0.1	96.01	2.1e-05
XM_036159803.1	5874	Ubn1	ubinuclein 1 (Ubn1). transcript variant X7. mRNA	0.4	470.63	2.1e-05
NM_001163268.2	2972	Lpar5	lysophosphatidic acid receptor 5 (Lpar5). transcript variant 1. mRNA	0.31	-38.99	2.1e-05
XM_006513227.5	3218	Usp15	ubiquitin specific peptidase 15 (Usp15). transcript variant X5. mRNA	0.64	376.63	2.2e-05
XM_006532322.5	6630	Kif1c	kinesin family member 1C (Kif1c). transcript variant X6. mRNA	0.07	178.5	2.2e-05
NM_001373949.1	4411	Ppp2r5c	protein phosphatase 2. regulatory subunit B'. gamma (Ppp2r5c). transcript variant 16. mRNA	0.28	-32.06	2.2e-05
NM_013719.3	5220	Eif2ak4	eukaryotic translation initiation factor 2 alpha kinase 4 (Eif2ak4). transcript variant 1. mRNA	0.36	-27.14	2.3e-05
NM_001285993.1	5583	Tbc1d5	TBC1 domain family. member 5 (Tbc1d5). transcript variant 3. mRNA	0.09	521.29	2.3e-05
NM_178045.4	6370	Rassf4	Ras association (RalGDS/AF-6) domain family member 4 (Rassf4). mRNA	2.76	-3.34	2.4e-05
XR_001779599.3	3879	Arhgap45	Rho GTPase activating protein 45 (Arhgap45). transcript variant X3. misc_RNA	0.12	537.02	2.4e-05
NM_010388.5	1411	H2-DMb2	histocompatibility 2. class II. locus Mb2 (H2-DMb2). transcript variant 1. mRNA	20.25	-3.81	2.5e-05
NM_001365019.1	5081	Malt1	MALT1 paracaspase (Malt1). transcript variant 2. mRNA	0.09	522.52	2.5e-05
NM_010272.2	5833	Gdf11	growth differentiation factor 11 (Gdf11). mRNA	0.64	-8.17	2.5e-05
XR_001780466.2	15203	Esyt2	extended synaptotagmin-like protein 2 (Esyt2). transcript variant X12. misc_RNA	0.38	71.98	2.5e-05
XM_011249163.4	2678	Tnip1	TNFAIP3 interacting protein 1 (Tnip1). transcript variant X4. mRNA	0.5	-441.93	2.5e-05
NM_001276445.1	3021	Tlr1	toll-like receptor 1 (Tlr1). transcript variant 2. mRNA	0.42	-404.59	2.6e-05
NM_001083312.2	5604	Gbp7	guanylate binding protein 7 (Gbp7). transcript variant 2. mRNA	4.81	4.24	2.6e-05
XM_006502711.5	3370	Csf3r	colony stimulating factor 3 receptor (granulocyte) (Csf3r). transcript variant X1. mRNA	7.72	-6.09	2.6e-05
XM_006520949.2	9859	Cacna1i	calcium channel. voltage-dependent. alpha 1I subunit (Cacna1i). transcript variant X1. mRNA	0.1	-130.83	2.6e-05
XM_006513493.1	4675	Sbno2	strawberry notch 2 (Sbno2). transcript variant X2. mRNA	0.24	157.26	2.6e-05
NM_001360711.1	2638	Dpp3	dipeptidylpeptidase 3 (Dpp3). transcript variant 2. mRNA	0.19	597.13	2.6e-05
XM_006496671.5	5424	Ifi203	interferon activated gene 203 (Ifi203). transcript variant X5. mRNA	3.6	4.1	2.6e-05
NM_015768.2	1513	Prok2	prokineticin 2 (Prok2). transcript variant 1. mRNA	0.22	119.67	2.6e-05
NM_019734.3	2264	Asah1	N-acylsphingosine amidohydrolase 1 (Asah1). mRNA	2.28	-5.39	2.6e-05
NR_045314.1	2745	9830166K06Rik	RIKEN cDNA 9830166K06 gene (9830166K06Rik). long non-coding RNA	1.43	22.5	2.7e-05
XM_036159862.1	4982	Vps8	VPS8 CORVET complex subunit (Vps8). transcript variant X4. mRNA	0.1	490.63	2.8e-05
NM_172773.3	3241	Slc17a5	solute carrier family 17 (anion/sugar transporter). member 5 (Slc17a5). transcript variant 1. mRNA	0.3	-412.03	3e-05
XM_036161587.1	1926	Coro1b	coronin. actin binding protein 1B (Coro1b). transcript variant X5. mRNA	1.11	316.5	3.4e-05
NM_001170552.1	6034	Krit1	KRIT1. ankyrin repeat containing (Krit1). transcript variant 2. mRNA	0.07	158.71	3.4e-05
XM_011238526.3	7217	Mgat4a	mannoside acetylglucosaminyltransferase 4. isoenzyme A (Mgat4a). transcript variant X7. mRNA	0.24	-63.23	3.6e-05
XM_011247549.4	8624	Flna	filamin. alpha (Flna). transcript variant X3. mRNA	0.09	165.24	3.6e-05
NM_007534.3	764	Bcl2a1b	B cell leukemia/lymphoma 2 related protein A1b (Bcl2a1b). mRNA	6.87	5.38	3.6e-05
XM_006535222.5	13996	Wdfy3	WD repeat and FYVE domain containing 3 (Wdfy3). transcript variant X3. mRNA	0.04	653.9	3.6e-05
NM_001355108.1	2517	Gabpb1	GA repeat binding protein. beta 1 (Gabpb1). transcript variant 9. mRNA	0.17	77.98	3.6e-05
NM_007415.3	3656	Parp1	poly (ADP-ribose) polymerase family. member 1 (Parp1). mRNA	6.29	-3.04	3.7e-05
NM_201642.4	3294	Ugt1a7c	UDP glucuronosyltransferase 1 family. polypeptide A7C (Ugt1a7c). mRNA	1.84	-9.77	3.7e-05
NM_001103181.1	8872	Tulp4	tubby like protein 4 (Tulp4). transcript variant 2. mRNA	0.31	452.46	3.8e-05
NM_172395.3	3128	Cdc42se1	CDC42 small effector 1 (Cdc42se1). transcript variant 1. mRNA	11.42	-2.91	4e-05
XM_017314707.1	6337	Abi3	ABI gene family. member 3 (Abi3). transcript variant X1. mRNA	0.99	416.24	4.1e-05
XM_006512428.3	3627	Ccr2	chemokine (C-C motif) receptor 2 (Ccr2). transcript variant X6. mRNA	1.11	-21.29	4.1e-05
XM_036152632.1	2638	Ctsc	cathepsin C (Ctsc). transcript variant X1. mRNA	0.54	-46.95	4.1e-05
NM_001310706.1	2832	Rgs3	regulator of G-protein signaling 3 (Rgs3). transcript variant 4. mRNA	0.33	-76.21	4.2e-05
XR_004940685.1	5549	Sppl2a	signal peptide peptidase like 2A (Sppl2a). transcript variant X5. misc_RNA	0.1	528.13	4.2e-05
XM_036163425.1	4628	Setdb1	SET domain. bifurcated 1 (Setdb1). transcript variant X1. mRNA	0.1	435.28	4.3e-05
NM_153197.4	1328	Clec4a3	C-type lectin domain family 4. member a3 (Clec4a3). transcript variant 1. mRNA	5.45	-9.03	4.3e-05
NM_175026.3	3497	Ifi209	interferon activated gene 209 (Ifi209). mRNA	6.64	3.52	4.3e-05
NR_130895.1	3798	Clca3a1	chloride channel accessory 3A1 (Clca3a1). transcript variant 2. non-coding RNA	0.08	368.2	4.4e-05
NM_001081418.1	5360	Bicra	BRD4 interacting chromatin remodeling complex associated protein (Bicra). mRNA	1.15	407.74	4.5e-05
NM_001044384.1	905	Timp1	tissue inhibitor of metalloproteinase 1 (Timp1). transcript variant 1. mRNA	0.43	307.89	4.6e-05
NM_001384204.1	2737	Zscan25	zinc finger and SCAN domain containing 25 (Zscan25). mRNA	0.24	335.27	4.6e-05
XM_011239050.4	2163	Traf1	TNF receptor-associated factor 1 (Traf1). transcript variant X1. mRNA	1.25	44.79	4.6e-05
XM_036152808.1	2006	Relb	avian reticuloendotheliosis viral (v-rel) oncogene related B (Relb). transcript variant X7. mRNA	0.45	44.46	4.6e-05
XM_006530083.1	1542	Sirpb1b	signal-regulatory protein beta 1B (Sirpb1b). transcript variant X1. mRNA	4.05	-13.03	4.6e-05
NM_146115.4	3428	Tor4a	torsin family 4. member A (Tor4a). mRNA	3.16	-4.06	4.6e-05
XM_011241716.3	3956	Spn	sialophorin (Spn). transcript variant X1. mRNA	2.55	-7.48	4.8e-05
NM_001363123.1	4295	Marchf1	membrane associated ring-CH-type finger 1 (Marchf1). transcript variant 5. mRNA	0.08	364.6	4.9e-05
NM_010016.3	2534	Cd55	CD55 molecule. decay accelerating factor for complement (Cd55). mRNA	6.23	-3.57	4.9e-05
NM_008320.4	2855	Irf8	interferon regulatory factor 8 (Irf8). transcript variant 2. mRNA	19.93	2.93	5e-05
XM_006537640.4	2413	Melk	maternal embryonic leucine zipper kinase (Melk). transcript variant X1. mRNA	0.2	42.17	5.1e-05
XR_381188.5	3133	Cmpk2	cytidine monophosphate (UMP-CMP) kinase 2. mitochondrial (Cmpk2). transcript variant X2. misc_RNA	0.11	312.3	5.2e-05
XM_011248439.3	7613	Atxn1l	ataxin 1-like (Atxn1l). transcript variant X1. mRNA	0.13	359.34	5.2e-05
XM_036164528.1	2046	Mfsd2a	major facilitator superfamily domain containing 2A (Mfsd2a). transcript variant X2. mRNA	0.16	62.87	5.2e-05
XM_030253159.2	3227	Csf3r	colony stimulating factor 3 receptor (granulocyte) (Csf3r). transcript variant X10. mRNA	1.54	-19.29	5.2e-05
NM_153789.3	2983	Mylip	myosin regulatory light chain interacting protein (Mylip). mRNA	4.19	-3.33	5.2e-05
XM_036162919.1	3770	Sema4c	sema domain. immunoglobulin domain (Ig). transmembrane domain (TM) and short cytoplasmic domain. (semaphorin) 4C (Sema4c). transcript variant X11. mRNA	0.29	353.7	5.3e-05
XM_011243390.3	8277	Dot1l	DOT1-like. histone H3 methyltransferase (S. cerevisiae) (Dot1l). transcript variant X1. mRNA	0.12	-355.03	5.3e-05
NM_018822.3	4324	Sgsh	N-sulfoglucosamine sulfohydrolase (sulfamidase) (Sgsh). mRNA	1.31	-8.04	5.3e-05
NM_019427.2	2966	Epb41l4b	erythrocyte membrane protein band 4.1 like 4b (Epb41l4b). transcript variant 1. mRNA	0.5	16.75	5.3e-05
NM_001289493.2	2743	Gbp3	guanylate binding protein 3 (Gbp3). transcript variant 3. mRNA	3.91	4.39	5.3e-05
NM_008761.4	1025	Fxyd5	FXYD domain-containing ion transport regulator 5 (Fxyd5). transcript variant 2. mRNA	26.15	-3.68	5.6e-05
NM_011943.3	2098	Map2k6	mitogen-activated protein kinase kinase 6 (Map2k6). transcript variant 1. mRNA	0.27	-33.23	5.8e-05
NM_010708.2	1586	Lgals9	lectin. galactose binding. soluble 9 (Lgals9). transcript variant 1. mRNA	2.57	6.03	5.8e-05
XM_006500215.3	3052	Tpx2	TPX2. microtubule-associated (Tpx2). transcript variant X3. mRNA	0.18	519.85	5.8e-05
XM_011249084.4	902	Xaf1	XIAP associated factor 1 (Xaf1). transcript variant X7. mRNA	2.32	12.06	5.8e-05
NM_173386.5	4090	Cgas	cyclic GMP-AMP synthase (Cgas). transcript variant 1. mRNA	1.11	5.51	5.9e-05
NM_001204910.1	3496	Ifi207	interferon activated gene 207 (Ifi207). mRNA	1.5	6.52	6e-05
XM_006496669.4	4898	Ifi203	interferon activated gene 203 (Ifi203). transcript variant X4. mRNA	2.14	4.2	6e-05
NM_146190.3	3716	Tubgcp5	tubulin. gamma complex associated protein 5 (Tubgcp5). transcript variant 1. mRNA	0.44	-30.45	6.1e-05
NM_001373939.1	3304	Ttc13	tetratricopeptide repeat domain 13 (Ttc13). transcript variant 4. mRNA	0.24	-332.05	6.2e-05
NM_133219.1	4021	Gcnt2	glucosaminyl (N-acetyl) transferase 2. I-branching enzyme (Gcnt2). transcript variant 3. mRNA	4.78	-4.88	6.2e-05
NM_178886.3	3910	Ldlrad3	low density lipoprotein receptor class A domain containing 3 (Ldlrad3). transcript variant 1. mRNA	0.33	-73.26	6.2e-05
XM_036155856.1	6977	Frs2	fibroblast growth factor receptor substrate 2 (Frs2). transcript variant X6. mRNA	0.48	313.94	6.2e-05
NM_001313914.1	5862	Thbs1	thrombospondin 1 (Thbs1). transcript variant 2. mRNA	18.66	3.53	6.2e-05
NM_001355754.1	959	Myl4	myosin. light polypeptide 4 (Myl4). transcript variant 1. mRNA	0.5	61.73	6.2e-05
NM_028713.1	3689	Rftn2	raftlin family member 2 (Rftn2). transcript variant 1. mRNA	0.2	-348.15	6.3e-05
NM_023044.2	2345	Slc15a3	solute carrier family 15. member 3 (Slc15a3). mRNA	7.93	3.65	6.3e-05
NM_001284397.1	587	Gngt2	guanine nucleotide binding protein (G protein). gamma transducing activity polypeptide 2 (Gngt2). transcript variant 4. mRNA	4.29	-8.1	6.4e-05
NM_001301818.1	8324	Fgd4	FYVE. RhoGEF and PH domain containing 4 (Fgd4). transcript variant 2. mRNA	0.12	-334.42	6.4e-05
XM_036162593.1	1912	Slc43a1	solute carrier family 43. member 1 (Slc43a1). transcript variant X4. mRNA	0.14	61.3	6.4e-05
NR_149307.1	2422	Cyb5r1	cytochrome b5 reductase 1 (Cyb5r1). transcript variant 3. non-coding RNA	2.58	-6.69	6.4e-05
XM_036160994.1	7917	Ndst1	N-deacetylase/N-sulfotransferase (heparan glucosaminyl) 1 (Ndst1). transcript variant X9. mRNA	0.14	-357.52	6.6e-05
NM_011808.3	5065	Ets1	E26 avian leukemia oncogene 1. 5' domain (Ets1). transcript variant 1. mRNA	21.04	-2.78	6.6e-05
XM_011250984.4	5948	Stag2	stromal antigen 2 (Stag2). transcript variant X2. mRNA	0.22	-349.88	6.7e-05
NM_001252658.1	4393	Ldlr	low density lipoprotein receptor (Ldlr). transcript variant 2. mRNA	0.08	457.29	6.7e-05
NM_030720.2	1551	Gpr84	G protein-coupled receptor 84 (Gpr84). mRNA	1.1	17.18	6.8e-05
NM_138604.3	4259	Otud5	OTU domain containing 5 (Otud5). transcript variant 2. mRNA	1.27	358.07	6.8e-05
XM_036161787.1	6268	Xiap	X-linked inhibitor of apoptosis (Xiap). transcript variant X14. mRNA	0.22	-359.52	6.8e-05
XM_006495839.4	5932	Phf3	PHD finger protein 3 (Phf3). transcript variant X10. mRNA	0.13	410.49	6.9e-05
NM_001356477.2	2102	Cnot8	CCR4-NOT transcription complex. subunit 8 (Cnot8). transcript variant 2. mRNA	0.47	-64.65	7.1e-05
NM_007901.5	3029	S1pr1	sphingosine-1-phosphate receptor 1 (S1pr1). mRNA	8.94	-3.34	7.3e-05
NM_001045536.2	11150	Zzef1	zinc finger. ZZ-type with EF hand domain 1 (Zzef1). mRNA	0.04	370.81	7.3e-05
NM_001271603.1	1340	Socs1	suppressor of cytokine signaling 1 (Socs1). transcript variant 1. mRNA	1.81	12.53	7.3e-05
NM_010242.3	3664	Fut4	fucosyltransferase 4 (Fut4). mRNA	0.48	-9.73	7.3e-05
NM_001001985.3	6529	Nat8l	N-acetyltransferase 8-like (Nat8l). mRNA	0.38	-13.14	7.3e-05
NM_001081237.1	6571	Klhl42	kelch-like 42 (Klhl42). mRNA	0.86	-5.61	7.4e-05
XM_006527472.4	3996	Pik3ap1	phosphoinositide-3-kinase adaptor protein 1 (Pik3ap1). transcript variant X1. mRNA	9.78	2.89	7.5e-05
NM_001359454.1	2711	Hvcn1	hydrogen voltage-gated channel 1 (Hvcn1). transcript variant 3. mRNA	0.84	-24.17	7.5e-05
NM_010796.3	1498	Clec10a	C-type lectin domain family 10. member A (Clec10a). transcript variant 2. mRNA	0.77	-20.93	7.5e-05
XM_036153839.1	8189	Rfx1	regulatory factor X. 1 (influences HLA class II expression) (Rfx1). transcript variant X2. mRNA	0.06	-41.53	7.6e-05
XM_006505460.1	6097	Ccnd2	cyclin D2 (Ccnd2). transcript variant X5. mRNA	4.19	3.8	7.6e-05
NM_001037713.4	2598	Xaf1	XIAP associated factor 1 (Xaf1). transcript variant 1. mRNA	1.6	7.05	7.8e-05
NM_028864.2	3396	Zc3hav1	zinc finger CCCH type. antiviral 1 (Zc3hav1). transcript variant 2. mRNA	5.8	2.92	7.8e-05
NM_031376.4	4113	Pik3ap1	phosphoinositide-3-kinase adaptor protein 1 (Pik3ap1). mRNA	4.62	3.54	7.8e-05
NM_011593.2	902	Timp1	tissue inhibitor of metalloproteinase 1 (Timp1). transcript variant 2. mRNA	0.33	52.03	7.8e-05
NM_001364913.1	1749	Pim1	proviral integration site 1 (Pim1). transcript variant 2. mRNA	10.31	5.17	7.9e-05
NM_009627.2	1394	Adm	adrenomedullin (Adm). mRNA	0.24	41	8.2e-05
XR_003952522.2	2538	Map3k8	mitogen-activated protein kinase kinase kinase 8 (Map3k8). transcript variant X1. misc_RNA	2.28	9.85	8.2e-05
NM_011693.3	3398	Vcam1	vascular cell adhesion molecule 1 (Vcam1). mRNA	0.31	22.01	8.2e-05
XM_011240068.4	9308	Tet2	tet methylcytosine dioxygenase 2 (Tet2). transcript variant X1. mRNA	0.34	336.3	8.2e-05
XM_036156487.1	10002	Bptf	bromodomain PHD finger transcription factor (Bptf). transcript variant X25. mRNA	0.12	38.73	8.7e-05
NM_010637.3	3057	Klf4	Kruppel-like factor 4 (gut) (Klf4). mRNA	1.73	-5.43	9.2e-05
NM_178911.4	1978	Pld4	phospholipase D family. member 4 (Pld4). mRNA	10.98	-4.69	9.3e-05
NM_007464.3	2820	Birc3	baculoviral IAP repeat-containing 3 (Birc3). mRNA	6.39	3.31	9.3e-05
NM_009856.3	2141	Cd83	CD83 antigen (Cd83). transcript variant 1. mRNA	8.02	4.86	9.3e-05
NM_001163138.1	4531	Card6	caspase recruitment domain family. member 6 (Card6). mRNA	2.46	-5.2	9.5e-05
XM_006530876.3	3357	Slc38a7	solute carrier family 38. member 7 (Slc38a7). transcript variant X1. mRNA	0.19	-77.46	9.8e-05
NM_030098.3	2168	Rnase6	ribonuclease. RNase A family. 6 (Rnase6). transcript variant 1. mRNA	2.68	-4.98	9.8e-05
XM_036155709.1	10778	Rev3l	REV3 like. DNA directed polymerase zeta catalytic subunit (Rev3l). transcript variant X5. mRNA	0.1	78.21	9.8e-05
NM_001363414.1	4400	Btnl10	butyrophilin-like 10 (Btnl10). transcript variant 1. mRNA	0.85	5.73	0.0001
XM_036163515.1	14147	Nav1	neuron navigator 1 (Nav1). transcript variant X12. mRNA	0.02	405.09	0.0001
XM_006539764.5	2395	Lilra5	leukocyte immunoglobulin-like receptor. subfamily A (with TM domain). member 5 (Lilra5). transcript variant X2. mRNA	0.32	-294.63	0.0001
NM_008133.4	3158	Glud1	glutamate dehydrogenase 1 (Glud1). mRNA; nuclear gene for mitochondrial product	7.4	-2.77	0.0001
NR_157295.2	2417	Tnfrsf13b	tumor necrosis factor receptor superfamily. member 13b (Tnfrsf13b). transcript variant 2. non-coding RNA	4.15	-5	0.00011
XM_011242353.4	2685	Birc3	baculoviral IAP repeat-containing 3 (Birc3). transcript variant X7. mRNA	10.63	3.03	0.00011
NM_001313922.1	3815	Nos2	nitric oxide synthase 2. inducible (Nos2). transcript variant 3. mRNA	0.07	79.39	0.00011
XR_004936880.1	7507	Rai1	retinoic acid induced 1 (Rai1). transcript variant X10. misc_RNA	0.06	274.16	0.00011
XM_036156490.1	4174	Srebf1	sterol regulatory element binding transcription factor 1 (Srebf1). transcript variant X1. mRNA	0.08	447.56	0.00011
NM_007626.3	8802	Cbx5	chromobox 5 (Cbx5). transcript variant 1. mRNA	0.04	451.59	0.00011
XM_036157927.1	10556	Ripk1	receptor (TNFRSF)-interacting serine-threonine kinase 1 (Ripk1). transcript variant X1. mRNA	0.98	7.7	0.00011
XR_003952174.1	4379	Vars2	valyl-tRNA synthetase 2. mitochondrial (Vars2). transcript variant X3. misc_RNA	0.18	255.41	0.00011
XM_006497644.5	8443	Col5a1	collagen. type V. alpha 1 (Col5a1). transcript variant X1. mRNA	0.1	40.63	0.00011
NM_001164171.1	6079	Myh6	myosin. heavy polypeptide 6. cardiac muscle. alpha (Myh6). transcript variant 1. mRNA	0.09	579.11	0.00011
XM_006524599.5	1038	Ebi3	Epstein-Barr virus induced gene 3 (Ebi3). transcript variant X1. mRNA	2.97	14.21	0.00012
NM_001033126.2	1576	Cd27	CD27 antigen (Cd27). transcript variant 1. mRNA	2.97	-8.23	0.00012
XM_036165904.1	7252	Dennd1b	DENN/MADD domain containing 1B (Dennd1b). transcript variant X5. mRNA	0.2	275.44	0.00012
NM_001276287.1	3451	Brat1	BRCA1-associated ATM activator 1 (Brat1). transcript variant 3. mRNA	0.21	-285.73	0.00012
NM_001174155.1	4636	Rasgrp4	RAS guanyl releasing protein 4 (Rasgrp4). transcript variant 1. mRNA	0.24	-384.6	0.00012
XM_036155991.1	4758	Med23	mediator complex subunit 23 (Med23). transcript variant X1. mRNA	0.38	48.43	0.00012
XM_036157664.1	7034	Kidins220	kinase D-interacting substrate 220 (Kidins220). transcript variant X12. mRNA	0.07	131.24	0.00012
NM_023326.2	861	Bmyc	brain expressed myelocytomatosis oncogene (Bmyc). mRNA	2.06	-9.58	0.00012
NM_001242423.1	2980	Otulinl	OTU deubiquitinase with linear linkage specificity like (Otulinl). transcript variant 1. mRNA	1.22	-9.86	0.00012
NM_001167983.1	7717	Sipa1l1	signal-induced proliferation-associated 1 like 1 (Sipa1l1). transcript variant 2. mRNA	0.15	77.42	0.00012
NM_007655.4	1002	Cd79a	CD79A antigen (immunoglobulin-associated alpha) (Cd79a). mRNA	78.81	-3.27	0.00012
NM_011331.3	536	Ccl12	chemokine (C-C motif) ligand 12 (Ccl12). mRNA	0.34	79.51	0.00012
XM_006510140.3	5980	Cep164	centrosomal protein 164 (Cep164). transcript variant X9. mRNA	0.16	-55.51	0.00012
XM_036162227.1	6725	Mapkbp1	mitogen-activated protein kinase binding protein 1 (Mapkbp1). transcript variant X4. mRNA	0.14	264.27	0.00013
NM_027389.3	7546	Gon4l	gon-4-like (C.elegans) (Gon4l). transcript variant 2. mRNA	0.14	345.01	0.00013
NM_016933.3	853	Ptprcap	protein tyrosine phosphatase. receptor type. C polypeptide-associated protein (Ptprcap). mRNA	16.71	-3.66	0.00013
XM_036165267.1	1996	Hnrnpdl	heterogeneous nuclear ribonucleoprotein D-like (Hnrnpdl). transcript variant X8. mRNA	0.51	240.52	0.00013
NM_009382.3	1753	Thy1	thymus cell antigen 1. theta (Thy1). mRNA	10.29	-3.94	0.00013
NM_001122667.2	8281	Mrtfb	myocardin related transcription factor B (Mrtfb). transcript variant 3. mRNA	0.35	-7.88	0.00013
XM_036165460.1	4733	Phtf2	putative homeodomain transcription factor 2 (Phtf2). transcript variant X1. mRNA	0.07	430.87	0.00013
XM_036165153.1	16227	Hectd4	HECT domain E3 ubiquitin protein ligase 4 (Hectd4). transcript variant X9. mRNA	0.04	385.98	0.00013
NM_183249.2	452	Wfdc21	WAP four-disulfide core domain 21 (Wfdc21). mRNA	14.45	6.58	0.00013
NR_110337.1	2170	Spn	sialophorin (Spn). transcript variant 3. non-coding RNA	0.78	-16.53	0.00013
NM_010639.8	958	Klk1	kallikrein 1 (Klk1). transcript variant 1. mRNA	0.72	-282.73	0.00013
NM_011638.4	4920	Tfrc	transferrin receptor (Tfrc). transcript variant 1. mRNA	3.87	3.38	0.00013
XM_036154589.1	6579	Ccr5	chemokine (C-C motif) receptor 5 (Ccr5). transcript variant X1. mRNA	1.12	7.61	0.00014
XM_006530092.4	787	Gm9733	predicted gene 9733 (Gm9733). transcript variant X1. mRNA	4.43	-6.96	0.00014
NM_173405.2	2685	Amz1	archaelysin family metallopeptidase 1 (Amz1). mRNA	0.77	-10.01	0.00014
XM_036160261.1	4740	Ehmt2	euchromatic histone lysine N-methyltransferase 2 (Ehmt2). transcript variant X9. mRNA	0.64	259.27	0.00014
XM_006499476.5	3631	Tspan18	tetraspanin 18 (Tspan18). transcript variant X4. mRNA	0.09	366.98	0.00014
NM_028752.3	2652	Hvcn1	hydrogen voltage-gated channel 1 (Hvcn1). transcript variant 2. mRNA	5.45	-5.93	0.00014
XM_006514667.3	1312	Upp1	uridine phosphorylase 1 (Upp1). transcript variant X1. mRNA	0.51	218.39	0.00014
NM_013545.3	2219	Ptpn6	protein tyrosine phosphatase. non-receptor type 6 (Ptpn6). transcript variant 1. mRNA	28.04	-2.75	0.00014
NM_022986.4	1893	Irak1bp1	interleukin-1 receptor-associated kinase 1 binding protein 1 (Irak1bp1). transcript variant 1. mRNA	0.1	221.11	0.00014
XM_036162917.1	4044	Sema4c	sema domain. immunoglobulin domain (Ig). transmembrane domain (TM) and short cytoplasmic domain. (semaphorin) 4C (Sema4c). transcript variant X9. mRNA	0.79	280.32	0.00014
NM_001093766.1	2904	Myadm	myeloid-associated differentiation marker (Myadm). transcript variant 3. mRNA	2.81	-9.17	0.00015
XM_036162586.1	2378	Ogfr	opioid growth factor receptor (Ogfr). transcript variant X2. mRNA	3.18	5.15	0.00015
XM_030255409.1	3370	Sp140	Sp140 nuclear body protein (Sp140). transcript variant X3. mRNA	1.8	6.42	0.00015
XR_875208.4	5462	Scrib	scribbled planar cell polarity (Scrib). transcript variant X12. misc_RNA	0.14	-53.6	0.00015
NM_031168.2	1141	Il6	interleukin 6 (Il6). transcript variant 1. mRNA	0.58	22.92	0.00015
NM_016803.3	6129	Chst3	carbohydrate sulfotransferase 3 (Chst3). mRNA	3.2	-3.95	0.00015
XM_006529517.5	6862	Zcchc2	zinc finger. CCHC domain containing 2 (Zcchc2). transcript variant X7. mRNA	0.24	282.81	0.00015
XM_006496939.5	11469	Cep170	centrosomal protein 170 (Cep170). transcript variant X3. mRNA	0.03	347.46	0.00015
XM_006518927.4	1380	Phf11b	PHD finger protein 11B (Phf11b). transcript variant X1. mRNA	3.21	6.41	0.00016
NM_009196.4	4430	Slc16a1	solute carrier family 16 (monocarboxylic acid transporters). member 1 (Slc16a1). mRNA	1.9	3.69	0.00016
NM_007934.3	4208	Enpep	glutamyl aminopeptidase (Enpep). mRNA	0.07	35.65	0.00016
NM_013605.2	2243	Muc1	mucin 1. transmembrane (Muc1). mRNA	0.48	12.33	0.00016
NM_001048177.3	4987	Jak2	Janus kinase 2 (Jak2). transcript variant 2. mRNA	0.11	115.11	0.00016
NR_165037.1	7065	Mau2	MAU2 sister chromatid cohesion factor (Mau2). transcript variant 8. non-coding RNA	1.68	30.79	0.00016
NM_178259.3	16011	Abca13	ATP-binding cassette. sub-family A (ABC1). member 13 (Abca13). mRNA	0.18	30.32	0.00017
NM_001164200.1	4302	Prkacb	protein kinase. cAMP dependent. catalytic. beta (Prkacb). transcript variant 4. mRNA	3.08	-3.42	0.00017
NM_010764.2	4326	Man2b1	mannosidase 2. alpha B1 (Man2b1). mRNA	3.31	-3.16	0.00017
NM_028544.1	3169	Rasip1	Ras interacting protein 1 (Rasip1). mRNA	0.42	10.48	0.00017
XM_006514706.5	14011	Abca13	ATP-binding cassette. sub-family A (ABC1). member 13 (Abca13). transcript variant X1. mRNA	0.16	14.65	0.00018
NM_010755.4	1971	Maff	v-maf musculoaponeurotic fibrosarcoma oncogene family. protein F (avian) (Maff). transcript variant 1. mRNA	0.18	276.22	0.00018
NM_001039488.1	3370	Lrif1	ligand dependent nuclear receptor interacting factor 1 (Lrif1). transcript variant 1. mRNA	0.2	-258.67	0.00018
NM_145402.3	1874	Tmem51	transmembrane protein 51 (Tmem51). mRNA	0.81	-21.46	0.00018
NM_001302346.1	2848	P2ry2	purinergic receptor P2Y. G-protein coupled 2 (P2ry2). transcript variant 2. mRNA	0.17	270.64	0.00018
NM_009252.2	2085	Serpina3n	serine (or cysteine) peptidase inhibitor. clade A. member 3N (Serpina3n). mRNA	0.15	31.02	0.00018
XR_389448.3	595	Gm31785	predicted gene. 31785 (Gm31785). ncRNA	0.59	27.69	0.00018
NM_026185.4	3249	Abhd15	abhydrolase domain containing 15 (Abhd15). mRNA	0.54	-11.6	0.00018
XM_030246035.2	6774	Rab11fip4	RAB11 family interacting protein 4 (class II) (Rab11fip4). transcript variant X4. mRNA	1.07	-7.79	0.00018
NM_001037905.3	3866	Dab2	disabled 2. mitogen-responsive phosphoprotein (Dab2). transcript variant 3. mRNA	0.08	327.97	0.00018
NM_001111324.2	4603	Nedd9	neural precursor cell expressed. developmentally down-regulated gene 9 (Nedd9). transcript variant 1. mRNA	4.98	-3.17	0.00018
XM_030255468.2	4062	Tnpo3	transportin 3 (Tnpo3). transcript variant X1. mRNA	0.17	265.63	0.00018
XM_006523857.5	4267	Pknox1	Pbx/knotted 1 homeobox (Pknox1). transcript variant X3. mRNA	0.14	-254.36	0.00018
NM_027995.3	3727	Paqr7	progestin and adipoQ receptor family member VII (Paqr7). transcript variant 4. mRNA	0.12	-62.88	0.00018
NM_173394.3	3264	Ticam2	toll-like receptor adaptor molecule 2 (Ticam2). mRNA	0.48	-14.82	0.00019
NM_001361088.1	4293	Fbxo38	F-box protein 38 (Fbxo38). transcript variant 2. mRNA	0.22	302.29	0.00019
NM_001122675.1	6681	Zcchc2	zinc finger. CCHC domain containing 2 (Zcchc2). transcript variant B. mRNA	1.66	3.43	0.00019
NM_145856.2	1178	Il17f	interleukin 17F (Il17f). mRNA	0.18	213.27	0.00019
XM_006519116.5	5999	Fndc3a	fibronectin type III domain containing 3A (Fndc3a). transcript variant X2. mRNA	0.19	344.04	0.00019
NM_009288.2	5082	Stk10	serine/threonine kinase 10 (Stk10). transcript variant 1. mRNA	9.36	-3.11	0.0002
XM_036164228.1	2638	Rgs3	regulator of G-protein signaling 3 (Rgs3). transcript variant X8. mRNA	0.46	-72.52	0.0002
XM_006531509.1	4140	Crispld2	cysteine-rich secretory protein LCCL domain containing 2 (Crispld2). transcript variant X2. mRNA	0.07	323.55	0.00021
NM_145836.2	4112	Irf2bpl	interferon regulatory factor 2 binding protein-like (Irf2bpl). mRNA	2.03	-3.81	0.00021
XM_006532659.4	3975	Slfn4	schlafen 4 (Slfn4). transcript variant X1. mRNA	5.78	12.64	0.00021
NM_198018.2	5238	Abr	active BCR-related gene (Abr). transcript variant 1. mRNA	0.16	-268.38	0.00021
XR_004942524.1	4302	Hip1r	huntingtin interacting protein 1 related (Hip1r). transcript variant X4. misc_RNA	0.37	258.7	0.00021
NM_172623.2	1742	Treml4	triggering receptor expressed on myeloid cells-like 4 (Treml4). transcript variant 2. mRNA	3.81	-10.24	0.00021
XM_030248567.2	2209	Ctsa	cathepsin A (Ctsa). transcript variant X1. mRNA	13.43	-2.67	0.00021
XM_006540185.5	2903	Gramd1a	GRAM domain containing 1A (Gramd1a). transcript variant X2. mRNA	0.1	319.63	0.00022
XM_011247402.4	4824	Ccdc88b	coiled-coil domain containing 88B (Ccdc88b). transcript variant X1. mRNA	0.07	419.44	0.00022
XM_036157396.1	5765	Arid4a	AT rich interactive domain 4A (RBP1-like) (Arid4a). transcript variant X1. mRNA	0.06	411.72	0.00022
NM_001172205.1	5699	Arid5a	AT rich interactive domain 5A (MRF1-like) (Arid5a). transcript variant 1. mRNA	4.73	3.47	0.00022
XM_017313004.3	2363	Tex45	testis expressed 45 (Tex45). transcript variant X4. mRNA	0.94	56.2	0.00022
NM_010387.3	1284	H2-DMb1	histocompatibility 2. class II. locus Mb1 (H2-DMb1). mRNA	6.41	-3.99	0.00022
NM_001368765.1	7334	Cr2	complement receptor 2 (Cr2). transcript variant 1. mRNA	0.54	-20.12	0.00022
NM_029654.4	10173	Atg2b	autophagy related 2B (Atg2b). mRNA	0.03	116.72	0.00022
NR_102719.1	6953	Rad51d	RAD51 paralog D (Rad51d). transcript variant 8. non-coding RNA	0.11	257.72	0.00023
XM_036162490.1	7328	Tanc1	tetratricopeptide repeat. ankyrin repeat and coiled-coil containing 1 (Tanc1). transcript variant X10. mRNA	0.04	302.6	0.00023
XM_006506905.3	5885	Aebp2	AE binding protein 2 (Aebp2). transcript variant X1. mRNA	0.04	350.35	0.00023
NM_001172073.1	2570	Ttc4	tetratricopeptide repeat domain 4 (Ttc4). transcript variant 2. mRNA	0.3	232.9	0.00023
XM_030253190.2	4076	Ephb2	Eph receptor B2 (Ephb2). transcript variant X3. mRNA	0.07	345.85	0.00023
NR_037959.1	616	1600010M07Rik	RIKEN cDNA 1600010M07 gene (1600010M07Rik). long non-coding RNA	1.81	-18.86	0.00023
NM_011410.3	3958	Slfn4	schlafen 4 (Slfn4). transcript variant 1. mRNA	4.55	11.74	0.00024
XM_006516461.5	8137	Tasor2	transcription activation suppressor family member 2 (Tasor2). transcript variant X1. mRNA	0.44	247.11	0.00024
NM_001001309.3	5846	Itga8	integrin alpha 8 (Itga8). transcript variant 1. mRNA	0.08	-62.57	0.00024
XM_006506309.3	5448	Tmcc1	transmembrane and coiled coil domains 1 (Tmcc1). transcript variant X3. mRNA	0.04	310.74	0.00024
NM_029662.2	2166	Mfsd2a	major facilitator superfamily domain containing 2A (Mfsd2a). mRNA	0.11	262.85	0.00024
XM_006536214.1	1745	Irf7	interferon regulatory factor 7 (Irf7). transcript variant X1. mRNA	2.06	11.38	0.00024
XM_006496019.3	5635	Inpp4a	inositol polyphosphate-4-phosphatase. type I (Inpp4a). transcript variant X11. mRNA	0.05	397.57	0.00024
NM_011150.3	2219	Lgals3bp	lectin. galactoside-binding. soluble. 3 binding protein (Lgals3bp). mRNA	7.32	3.46	0.00024
XM_006520117.3	8263	Azin1	antizyme inhibitor 1 (Azin1). transcript variant X3. mRNA	0.37	226.45	0.00024
XR_878523.4	7887	Gm28913	predicted gene 28913 (Gm28913). transcript variant X1. ncRNA	0.36	20.35	0.00025
NM_001379178.1	3485	Erlin2	ER lipid raft associated 2 (Erlin2). transcript variant 7. mRNA	0.1	248.02	0.00025
NM_008917.3	2493	Ppt1	palmitoyl-protein thioesterase 1 (Ppt1). mRNA	5.94	-2.92	0.00025
NM_020504.4	1070	Cldn13	claudin 13 (Cldn13). mRNA	0.89	11.46	0.00025
XM_006506074.3	2789	Lrrc61	leucine rich repeat containing 61 (Lrrc61). transcript variant X3. mRNA	0.74	-15	0.00026
NM_001005342.2	752	Ypel4	yippee like 4 (Ypel4). mRNA	1.66	14.24	0.00026
NM_001346670.1	4885	Abr	active BCR-related gene (Abr). transcript variant 5. mRNA	2.99	-5.78	0.00026
NM_031373.3	2306	Ogfr	opioid growth factor receptor (Ogfr). mRNA	5.51	3.23	0.00027
NR_125721.1	4134	Cgas	cyclic GMP-AMP synthase (Cgas). transcript variant 2. non-coding RNA	0.32	224.31	0.00027
NM_001042605.1	1431	Cd74	CD74 antigen (invariant polypeptide of major histocompatibility complex. class II antigen-associated) (Cd74). transcript variant 1. mRNA	39.66	-2.84	0.00027
NM_001313975.2	3466	Prkar1a	protein kinase. cAMP dependent regulatory. type I. alpha (Prkar1a). transcript variant 4. mRNA	0.16	298.97	0.00027
XM_030247063.2	2152	LOC115488029	uncharacterized LOC115488029 (LOC115488029). mRNA	175.39	2.79	0.00028
XR_003956240.2	2116	Mybph	myosin binding protein H (Mybph). transcript variant X2. misc_RNA	0.98	49.99	0.00028
XM_030245860.2	3376	Kat7	K(lysine) acetyltransferase 7 (Kat7). transcript variant X6. mRNA	0.34	43.21	0.00028
XR_003949581.1	2894	Gm32917	predicted gene. 32917 (Gm32917). transcript variant X1. ncRNA	0.06	179.94	0.00028
XR_875669.4	2819	Gm35853	predicted gene. 35853 (Gm35853). transcript variant X2. ncRNA	0.28	-254.38	0.00028
XM_036158364.1	6594	Ankrd28	ankyrin repeat domain 28 (Ankrd28). transcript variant X7. mRNA	0.04	147.77	0.00028
XM_030244331.1	15318	Herc1	HECT and RLD domain containing E3 ubiquitin protein ligase family member 1 (Herc1). transcript variant X6. mRNA	0.06	73.92	0.00028
NM_007641.6	2984	Ms4a1	membrane-spanning 4-domains. subfamily A. member 1 (Ms4a1). mRNA	13.86	-3.11	0.00028
NM_001168652.1	2264	Lrch4	leucine-rich repeats and calponin homology (CH) domain containing 4 (Lrch4). transcript variant 2. mRNA	6.99	-3.26	0.00028
NM_010187.2	1415	Fcgr2b	Fc receptor. IgG. low affinity IIb (Fcgr2b). transcript variant 2. mRNA	6.22	4.12	0.00028
NM_011358.2	1903	Srsf2	serine and arginine-rich splicing factor 2 (Srsf2). mRNA	5.29	3.77	0.00028
XM_036157702.1	33757	Trim9	tripartite motif-containing 9 (Trim9). transcript variant X24. mRNA	0.06	51.81	0.00029
NM_001136073.2	6845	Nfatc2	nuclear factor of activated T cells. cytoplasmic. calcineurin dependent 2 (Nfatc2). transcript variant 4. mRNA	0.22	-18.92	0.00029
XM_011239457.2	2985	Arhgap1	Rho GTPase activating protein 1 (Arhgap1). transcript variant X5. mRNA	0.12	316.61	0.00029
NM_011198.4	4460	Ptgs2	prostaglandin-endoperoxide synthase 2 (Ptgs2). mRNA	0.52	12.78	0.00029
NM_177708.5	3308	Rtn4rl1	reticulon 4 receptor-like 1 (Rtn4rl1). mRNA	0.2	-234.74	0.0003
XM_036159620.1	900	Prg2	proteoglycan 2. bone marrow (Prg2). transcript variant X1. mRNA	0.42	196.33	0.0003
NM_001374640.1	1706	Mndal	myeloid nuclear differentiation antigen like (Mndal). transcript variant 2. mRNA	0.25	65.4	0.00031
NM_177305.4	3967	Arl4c	ADP-ribosylation factor-like 4C (Arl4c). mRNA	4.93	-2.76	0.00031
NM_001313979.1	4332	Srebf1	sterol regulatory element binding transcription factor 1 (Srebf1). transcript variant 2. mRNA	0.15	-229.68	0.00031
XM_017318355.3	6977	Rps6ka3	ribosomal protein S6 kinase polypeptide 3 (Rps6ka3). transcript variant X8. mRNA	0.18	-212.53	0.00031
NM_001168510.1	1906	Ffar2	free fatty acid receptor 2 (Ffar2). transcript variant 3. mRNA	0.1	202.41	0.00031
XM_017319464.3	4175	Stat1	signal transducer and activator of transcription 1 (Stat1). transcript variant X3. mRNA	0.1	351.55	0.00031
NM_008494.3	2299	Lfng	LFNG O-fucosylpeptide 3-beta-N-acetylglucosaminyltransferase (Lfng). mRNA	8.8	-2.93	0.00031
XM_006540103.5	5785	Zc3h4	zinc finger CCCH-type containing 4 (Zc3h4). transcript variant X4. mRNA	0.04	291.33	0.00031
NM_001316684.1	2515	Sh3bp1	SH3-domain binding protein 1 (Sh3bp1). transcript variant 1. mRNA	3.62	-5.05	0.00031
NM_010235.2	1705	Fosl1	fos-like antigen 1 (Fosl1). mRNA	0.36	40.41	0.00031
XM_030250701.2	5926	Ehbp1l1	EH domain binding protein 1-like 1 (Ehbp1l1). transcript variant X1. mRNA	0.06	308.91	0.00032
NM_009969.4	1033	Csf2	colony stimulating factor 2 (granulocyte-macrophage) (Csf2). mRNA	0.32	26.55	0.00032
NM_007669.5	1913	Cdkn1a	cyclin-dependent kinase inhibitor 1A (P21) (Cdkn1a). transcript variant 1. mRNA	2.24	4.67	0.00032
NM_001161424.1	6785	Ikbkg	inhibitor of kappaB kinase gamma (Ikbkg). transcript variant 7. mRNA	0.04	266.78	0.00032
NM_010496.3	1289	Id2	inhibitor of DNA binding 2 (Id2). mRNA	22.63	3.07	0.00032
NM_008842.4	2665	Pim1	proviral integration site 1 (Pim1). transcript variant 1. mRNA	31.87	2.67	0.00032
XM_006530330.5	1484	Oas1a	2'-5' oligoadenylate synthetase 1A (Oas1a). transcript variant X1. mRNA	1.43	9.31	0.00032
XM_006538830.2	4764	Tnfrsf14	tumor necrosis factor receptor superfamily. member 14 (herpesvirus entry mediator) (Tnfrsf14). transcript variant X1. mRNA	0.07	365.12	0.00033
NM_010386.4	1658	H2-DMa	histocompatibility 2. class II. locus DMa (H2-DMa). transcript variant 2. mRNA	7.96	-3.99	0.00033
XM_030243770.1	7659	Klf7	Kruppel-like factor 7 (ubiquitous) (Klf7). transcript variant X6. mRNA	0.04	413.73	0.00033
XM_006506006.1	4207	Frmd4b	FERM domain containing 4B (Frmd4b). transcript variant X4. mRNA	0.71	20.43	0.00033
NM_023465.4	2686	Ctnnbip1	catenin beta interacting protein 1 (Ctnnbip1). transcript variant 1. mRNA	0.29	-34.52	0.00033
XM_036159696.1	3732	Sirpa	signal-regulatory protein alpha (Sirpa). transcript variant X9. mRNA	3.2	-4.23	0.00034
XM_006504189.4	2369	Zcchc4	zinc finger. CCHC domain containing 4 (Zcchc4). transcript variant X2. mRNA	0.14	38.88	0.00034
NM_001311093.1	3539	Tmem209	transmembrane protein 209 (Tmem209). transcript variant 2. mRNA	0.11	246.79	0.00034
NM_001008497.2	1812	P2ry14	purinergic receptor P2Y. G-protein coupled. 14 (P2ry14). transcript variant 2. mRNA	0.1	191.83	0.00034
XM_006502714.3	3311	Csf3r	colony stimulating factor 3 receptor (granulocyte) (Csf3r). transcript variant X6. mRNA	1.28	-13.02	0.00034
XM_036159520.1	8423	Azin1	antizyme inhibitor 1 (Azin1). transcript variant X4. mRNA	0.3	203.85	0.00034
NM_001168621.2	4141	Znrf1	zinc and ring finger 1 (Znrf1). transcript variant 2. mRNA	0.05	213.87	0.00034
NM_018744.2	6901	Sema6a	sema domain. transmembrane domain (TM). and cytoplasmic domain. (semaphorin) 6A (Sema6a). transcript variant 1. mRNA	0.06	241.01	0.00034
NM_173398.3	2225	Gpr171	G protein-coupled receptor 171 (Gpr171). mRNA	4.09	3.53	0.00034
NM_001110855.1	2010	Crem	cAMP responsive element modulator (Crem). transcript variant 11. mRNA	0.13	23.68	0.00034
NM_007801.3	1630	Ctsh	cathepsin H (Ctsh). transcript variant 1. mRNA	10.3	-3.12	0.00034
XM_006533569.5	3786	Xaf1	XIAP associated factor 1 (Xaf1). transcript variant X3. mRNA	1.41	11.71	0.00035
XM_006509946.3	1415	Acp5	acid phosphatase 5. tartrate resistant (Acp5). transcript variant X4. mRNA	5.53	-3.87	0.00035
NM_001035533.2	6810	Pakap	paralemmin A kinase anchor protein (Pakap). transcript variant 1. mRNA	0.04	300.52	0.00035
XM_017321177.2	4799	Ttyh3	tweety family member 3 (Ttyh3). transcript variant X3. mRNA	0.06	295.99	0.00035
NM_010422.2	1922	Hexb	hexosaminidase B (Hexb). mRNA	4.12	-3.72	0.00035
XM_036160206.1	2127	LOC118568241	protein NYNRIN-like (LOC118568241). transcript variant X3. mRNA	25.35	2.88	0.00036
XM_036162391.1	1770	Prg3	proteoglycan 3 (Prg3). transcript variant X1. mRNA	0.18	221.09	0.00036
XM_036152293.1	1343	Rgs1	regulator of G-protein signaling 1 (Rgs1). transcript variant X1. mRNA	0.82	26.93	0.00036
NM_133501.2	1924	Ntng2	netrin G2 (Ntng2). transcript variant b. mRNA	6.22	3.63	0.00037
NM_024204.6	1754	Ankrd22	ankyrin repeat domain 22 (Ankrd22). mRNA	1.11	10.32	0.00037
XM_006531443.5	1859	Mlkl	mixed lineage kinase domain-like (Mlkl). transcript variant X4. mRNA	0.11	53.33	0.00037
NM_173371.4	4746	H6pd	hexose-6-phosphate dehydrogenase (glucose 1-dehydrogenase) (H6pd). transcript variant 1. mRNA	0.37	-31.75	0.00037
NM_001122639.2	1561	Galnt9	polypeptide N-acetylgalactosaminyltransferase 9 (Galnt9). transcript variant B. mRNA	0.46	-19.09	0.00037
NM_013521.2	1332	Fpr1	formyl peptide receptor 1 (Fpr1). mRNA	15.83	4.65	0.00037
XM_017317647.1	2515	Ranbp3	RAN binding protein 3 (Ranbp3). transcript variant X5. mRNA	0.24	272.58	0.00037
NM_001164562.1	5676	Sec22c	SEC22 homolog C. vesicle trafficking protein (Sec22c). transcript variant 2. mRNA	0.1	-212.05	0.00037
XM_006534180.4	5875	Ints2	integrator complex subunit 2 (Ints2). transcript variant X5. mRNA	0.11	-216.61	0.00038
XM_030243657.1	6889	Ralgps2	Ral GEF with PH domain and SH3 binding motif 2 (Ralgps2). transcript variant X7. mRNA	0.04	290.39	0.00038
NM_001289477.1	2607	Papss1	3'-phosphoadenosine 5'-phosphosulfate synthase 1 (Papss1). transcript variant 2. mRNA	0.08	196.14	0.00038
NM_001002898.1	1232	Sirpb1a	signal-regulatory protein beta 1A (Sirpb1a). mRNA	3.28	-7.92	0.00038
NM_001256133.1	2723	Nipa2	non imprinted in Prader-Willi/Angelman syndrome 2 homolog (human) (Nipa2). transcript variant 5. mRNA	0.09	218.65	0.00039
XM_006500599.3	10220	Helz2	helicase with zinc finger 2. transcriptional coactivator (Helz2). transcript variant X1. mRNA	3.63	21.99	0.00039
XM_036156821.1	5183	Specc1	sperm antigen with calponin homology and coiled-coil domains 1 (Specc1). transcript variant X6. mRNA	1.72	9.78	0.00039
NM_001177369.1	3054	Nfkb2	nuclear factor of kappa light polypeptide gene enhancer in B cells 2. p49/p100 (Nfkb2). transcript variant 2. mRNA	14.57	2.8	0.0004
NM_133990.5	3734	Il13ra1	interleukin 13 receptor. alpha 1 (Il13ra1). mRNA	2.05	-4.62	0.0004
XM_006527336.5	3109	Naa40	N(alpha)-acetyltransferase 40. NatD catalytic subunit (Naa40). transcript variant X1. mRNA	0.14	200.34	0.0004
NM_023137.3	947	Ubd	ubiquitin D (Ubd). mRNA	0.17	188.24	0.0004
XM_006535411.5	4394	Prkci	protein kinase C. iota (Prkci). transcript variant X1. mRNA	0.06	71.21	0.00041
NM_027993.4	3325	Fam219a	family with sequence similarity 219. member A (Fam219a). transcript variant 2. mRNA	0.12	47.61	0.00041
XM_036164979.1	7567	Arap2	ArfGAP with RhoGAP domain. ankyrin repeat and PH domain 2 (Arap2). transcript variant X4. mRNA	0.12	205.87	0.00041
NM_001161423.1	6788	Ikbkg	inhibitor of kappaB kinase gamma (Ikbkg). transcript variant 6. mRNA	0.04	287.37	0.00042
NM_009122.2	6228	Satb1	special AT-rich sequence binding protein 1 (Satb1). transcript variant 2. mRNA	0.1	66.21	0.00042
NM_016758.3	2356	Rgs14	regulator of G-protein signaling 14 (Rgs14). transcript variant 1. mRNA	4.14	-3.97	0.00042
NM_010757.2	2825	Mafk	v-maf musculoaponeurotic fibrosarcoma oncogene family. protein K (avian) (Mafk). mRNA	4.59	2.94	0.00042
NR_153404.1	6914	Polg	polymerase (DNA directed). gamma (Polg). transcript variant 4. non-coding RNA	0.36	206.48	0.00042
XM_006498338.3	5402	Fmnl2	formin-like 2 (Fmnl2). transcript variant X12. mRNA	0.08	220.76	0.00043
XM_030254994.1	9976	Ankrd44	ankyrin repeat domain 44 (Ankrd44). transcript variant X7. mRNA	0.03	197.82	0.00043
NM_010848.3	3420	Myb	myeloblastosis oncogene (Myb). transcript variant 2. mRNA	3.5	5.36	0.00043
NM_008607.2	2675	Mmp13	matrix metallopeptidase 13 (Mmp13). mRNA	0.2	14.67	0.00043
NM_009843.4	1933	Ctla4	cytotoxic T-lymphocyte-associated protein 4 (Ctla4). transcript variant 1. mRNA	3.45	6.23	0.00044
NM_138749.3	6519	Plxnb2	plexin B2 (Plxnb2). transcript variant 2. mRNA	1.7	-11.66	0.00044
NM_009778.3	5139	C3	complement component 3 (C3). mRNA	7.49	3.17	0.00044
NM_178407.3	7363	Arap2	ArfGAP with RhoGAP domain. ankyrin repeat and PH domain 2 (Arap2). mRNA	2.03	2.87	0.00045
NM_009531.2	3634	Xpc	xeroderma pigmentosum. complementation group C (Xpc). mRNA	1.75	-3.87	0.00045
NR_126529.1	2069	Oas1g	2'-5' oligoadenylate synthetase 1G (Oas1g). transcript variant 2. non-coding RNA	0.07	150.96	0.00045
XM_030247248.2	3956	Zfp65	zinc finger protein 65 (Zfp65). transcript variant X2. mRNA	0.04	164.83	0.00045
XM_006540008.4	2877	Zfp146	zinc finger protein 146 (Zfp146). transcript variant X1. mRNA	0.3	-54.11	0.00045
XM_006527859.4	5509	L1cam	L1 cell adhesion molecule (L1cam). transcript variant X1. mRNA	0.04	281.8	0.00045
XM_006524201.5	4714	Ttc7	tetratricopeptide repeat domain 7 (Ttc7). transcript variant X1. mRNA	0.11	-211.92	0.00045
NM_013683.2	2950	Tap1	transporter 1. ATP-binding cassette. sub-family B (MDR/TAP) (Tap1). transcript variant 1. mRNA	17.97	2.73	0.00045
XM_006525925.5	3243	Gm4951	predicted gene 4951 (Gm4951). transcript variant X3. mRNA	0.08	55.31	0.00046
NM_008405.3	2618	Itgb2l	integrin beta 2-like (Itgb2l). mRNA	2.51	15.23	0.00046
XM_036157538.1	5294	Mpp5	membrane protein. palmitoylated 5 (MAGUK p55 subfamily member 5) (Mpp5). transcript variant X5. mRNA	0.26	214.08	0.00046
NM_024444.2	1702	Cyp4f18	cytochrome P450. family 4. subfamily f. polypeptide 18 (Cyp4f18). mRNA	9.21	-4.06	0.00046
XM_036152447.1	10917	Cep170	centrosomal protein 170 (Cep170). transcript variant X17. mRNA	0.06	-216.69	0.00046
XM_006539481.5	3257	Akt2	thymoma viral proto-oncogene 2 (Akt2). transcript variant X3. mRNA	0.19	210.1	0.00047
NM_001165954.1	11051	Phc3	polyhomeotic 3 (Phc3). transcript variant 1. mRNA	0.31	-23.96	0.00047
XM_006504570.3	2844	Agfg2	ArfGAP with FG repeats 2 (Agfg2). transcript variant X2. mRNA	0.07	166.73	0.00048
XM_036159348.1	4492	Arhgap39	Rho GTPase activating protein 39 (Arhgap39). transcript variant X4. mRNA	0.3	-25	0.00048
XM_030245895.1	3449	Llgl2	LLGL2 scribble cell polarity complex component (Llgl2). transcript variant X3. mRNA	0.04	164.38	0.00048
NM_145933.4	4508	St6gal1	beta galactoside alpha 2.6 sialyltransferase 1 (St6gal1). transcript variant 1. mRNA	3.13	-6.03	0.00049
XM_006525486.1	5276	Arap3	ArfGAP with RhoGAP domain. ankyrin repeat and PH domain 3 (Arap3). transcript variant X1. mRNA	0.04	250.29	0.00049
NM_177372.3	4122	Dna2	DNA replication helicase/nuclease 2 (Dna2). transcript variant 1. mRNA	0.4	-9.89	0.00049
XM_036153821.1	8494	Pcm1	pericentriolar material 1 (Pcm1). transcript variant X12. mRNA	0.19	221.05	0.0005
XR_004942926.1	6441	Mia3	melanoma inhibitory activity 3 (Mia3). transcript variant X5. misc_RNA	0.37	195.52	0.0005
NM_008678.3	8286	Ncoa2	nuclear receptor coactivator 2 (Ncoa2). transcript variant a. mRNA	0.07	-116.88	0.0005
NM_153547.6	1935	Gnl3	guanine nucleotide binding protein-like 3 (nucleolar) (Gnl3). transcript variant 1. mRNA	4.05	3.53	0.00052
NM_010821.2	4345	Mpeg1	macrophage expressed gene 1 (Mpeg1). mRNA	9.3	-3.47	0.00052
XM_006519297.3	4709	Acin1	apoptotic chromatin condensation inducer 1 (Acin1). transcript variant X2. mRNA	0.14	-223.79	0.00052
XM_017320350.2	1255	Taf12	TATA-box binding protein associated factor 12 (Taf12). transcript variant X1. mRNA	0.26	78.18	0.00053
NM_001373941.1	2917	Ttc13	tetratricopeptide repeat domain 13 (Ttc13). transcript variant 7. mRNA	0.26	-16.54	0.00053
XM_036160999.1	4244	Lipg	lipase. endothelial (Lipg). transcript variant X2. mRNA	0.05	209.76	0.00053
XM_036163386.1	7565	Gon4l	gon-4-like (C.elegans) (Gon4l). transcript variant X3. mRNA	0.02	232.71	0.00053
NM_001357285.1	3904	Arih2	ariadne RBR E3 ubiquitin protein ligase 2 (Arih2). transcript variant 3. mRNA	0.08	290.55	0.00053
XM_030253416.2	3604	Fam214b	family with sequence similarity 214. member B (Fam214b). transcript variant X10. mRNA	0.06	73.97	0.00053
NM_133955.4	3367	Rhou	ras homolog family member U (Rhou). mRNA	0.62	6.6	0.00054
XM_036156213.1	3808	Slc16a6	solute carrier family 16 (monocarboxylic acid transporters). member 6 (Slc16a6). transcript variant X5. mRNA	0.05	207.61	0.00054
XM_006512713.4	12376	Utrn	utrophin (Utrn). transcript variant X10. mRNA	0.05	264.23	0.00054
NM_001164402.1	4180	Ptpro	protein tyrosine phosphatase. receptor type. O (Ptpro). transcript variant 3. mRNA	0.26	-18.1	0.00055
XM_006514533.4	6940	Il9r	interleukin 9 receptor (Il9r). transcript variant X1. mRNA	0.15	-18.3	0.00055
XM_006541498.5	7854	Bcorl1	BCL6 co-repressor-like 1 (Bcorl1). transcript variant X1. mRNA	0.06	-203.02	0.00055
XM_006533073.1	2187	Cd300e	CD300E molecule (Cd300e). transcript variant X1. mRNA	1.93	-11.23	0.00055
XM_036155407.1	3504	Mtmr2	myotubularin related protein 2 (Mtmr2). transcript variant X5. mRNA	0.29	203.82	0.00055
NM_008039.2	1296	Fpr2	formyl peptide receptor 2 (Fpr2). mRNA	12.16	3.72	0.00055
XM_036160835.1	7434	Crebrf	CREB3 regulatory factor (Crebrf). transcript variant X4. mRNA	0.13	-176.95	0.00056
XM_030245669.2	4406	Npepps	aminopeptidase puromycin sensitive (Npepps). transcript variant X3. mRNA	0.29	201.42	0.00056
NM_018734.4	2648	Gbp3	guanylate binding protein 3 (Gbp3). transcript variant 2. mRNA	0.49	36.15	0.00057
NM_177337.3	1505	Arl11	ADP-ribosylation factor-like 11 (Arl11). mRNA	1.05	-11.31	0.00057
NM_144893.2	2009	Slc35c2	solute carrier family 35. member C2 (Slc35c2). transcript variant 2. mRNA	0.42	-46.43	0.00057
NR_156132.1	5695	Nup188	nucleoporin 188 (Nup188). transcript variant 2. non-coding RNA	0.06	241.96	0.00057
NM_028679.4	3035	Irak3	interleukin-1 receptor-associated kinase 3 (Irak3). transcript variant 1. mRNA	2.46	4.26	0.00057
XM_036152946.1	8016	Arhgap35	Rho GTPase activating protein 35 (Arhgap35). transcript variant X4. mRNA	0.03	59.77	0.00057
NM_001348354.1	3495	Skint3	selection and upkeep of intraepithelial T cells 3 (Skint3). transcript variant 3. mRNA	0.18	-47.33	0.00057
NM_001369183.1	8287	Ralgapb	Ral GTPase activating protein. beta subunit (non-catalytic) (Ralgapb). transcript variant 4. mRNA	0.03	291.81	0.00058
NM_001271676.1	1937	Ifi47	interferon gamma inducible protein 47 (Ifi47). transcript variant 2. mRNA	2.15	12.66	0.00058
XM_006514218.5	1291	Glipr1	GLI pathogenesis-related 1 (glioma) (Glipr1). transcript variant X2. mRNA	0.98	-16.29	0.00059
NM_153505.4	4717	Nckap1l	NCK associated protein 1 like (Nckap1l). mRNA	8.86	-2.6	0.00059
XM_036153140.1	9386	Nvl	nuclear VCP-like (Nvl). transcript variant X4. mRNA	0.02	219.68	0.00059
XM_011243063.2	3767	Ccr2	chemokine (C-C motif) receptor 2 (Ccr2). transcript variant X4. mRNA	0.21	-42.21	0.00059
XM_030254429.1	2348	Trafd1	TRAF type zinc finger domain containing 1 (Trafd1). transcript variant X7. mRNA	1.65	10.64	0.0006
NM_010406.3	5421	Hc	hemolytic complement (Hc). mRNA	0.04	46.24	0.0006
NM_010378.3	1128	H2-Aa	histocompatibility 2. class II antigen A. alpha (H2-Aa). mRNA	174.65	-3.02	0.0006
NM_001357493.1	612	Saa1	serum amyloid A 1 (Saa1). transcript variant 2. mRNA	0.32	227.16	0.0006
XM_036159920.1	2549	Klhl6	kelch-like 6 (Klhl6). transcript variant X2. mRNA	8.61	11.83	0.0006
NM_010908.5	2065	Nfkbib	nuclear factor of kappa light polypeptide gene enhancer in B cells inhibitor. beta (Nfkbib). transcript variant 1. mRNA	2.38	11.11	0.0006
XM_011242103.2	316	Gm15056	predicted gene 15056 (Gm15056). transcript variant X1. mRNA	0.5	153.26	0.00061
XM_036162705.1	4206	Slc9a8	solute carrier family 9 (sodium/hydrogen exchanger). member 8 (Slc9a8). transcript variant X8. mRNA	0.1	196.25	0.00061
XM_011240378.1	2709	Osbpl9	oxysterol binding protein-like 9 (Osbpl9). transcript variant X9. mRNA	0.07	219	0.00062
NM_001037539.2	1450	Prok2	prokineticin 2 (Prok2). transcript variant 2. mRNA	0.74	27.65	0.00062
NM_001370814.1	3358	Tmem156	transmembrane protein 156 (Tmem156). mRNA	1.08	-11.9	0.00062
NM_007435.2	3664	Abcd1	ATP-binding cassette. sub-family D (ALD). member 1 (Abcd1). mRNA	2.95	-3.11	0.00062
NM_001003898.3	6495	Tardbp	TAR DNA binding protein (Tardbp). transcript variant 6. mRNA	0.08	-189.3	0.00062
XM_006501059.4	6442	Arhgef2	rho/rac guanine nucleotide exchange factor (GEF) 2 (Arhgef2). transcript variant X2. mRNA	0.04	282.82	0.00063
NM_008533.2	2326	Cd180	CD180 antigen (Cd180). transcript variant 1. mRNA	2.02	-7.25	0.00063
NM_153142.3	3059	Slc35e4	solute carrier family 35. member E4 (Slc35e4). mRNA	0.51	-13.16	0.00063
XM_036160590.1	5035	Zfp760	zinc finger protein 760 (Zfp760). transcript variant X6. mRNA	0.11	-42.42	0.00063
NM_001033380.3	6891	Itpripl2	inositol 1.4.5-triphosphate receptor interacting protein-like 2 (Itpripl2). mRNA	0.6	-4.75	0.00065
NM_001357953.1	2050	Ttll1	tubulin tyrosine ligase-like 1 (Ttll1). transcript variant 2. mRNA	0.09	244.27	0.00065
XM_006500857.5	2795	Zzz3	zinc finger. ZZ domain containing 3 (Zzz3). transcript variant X14. mRNA	0.07	216.44	0.00065
XM_006529753.4	2616	Mybph	myosin binding protein H (Mybph). transcript variant X1. mRNA	0.87	179.82	0.00065
NM_007995.3	1317	Fcna	ficolin A (Fcna). mRNA	0.19	293.05	0.00065
XM_030252805.1	3394	Elf2	E74-like factor 2 (Elf2). transcript variant X11. mRNA	0.08	229.68	0.00065
NM_001161768.1	5712	Galnt6	polypeptide N-acetylgalactosaminyltransferase 6 (Galnt6). transcript variant 3. mRNA	0.07	180.37	0.00066
NM_213660.3	4517	Stat3	signal transducer and activator of transcription 3 (Stat3). transcript variant 2. mRNA	5.45	3.32	0.00067
XM_011244067.4	7798	Sipa1l1	signal-induced proliferation-associated 1 like 1 (Sipa1l1). transcript variant X10. mRNA	0.31	44.27	0.00067
NM_011237.2	2046	Rad9a	RAD9 checkpoint clamp component A (Rad9a). mRNA	2.34	-4.02	0.00067
XM_036162239.1	6955	Gtf3c4	general transcription factor IIIC. polypeptide 4 (Gtf3c4). transcript variant X4. mRNA	0.03	273.57	0.00067
NM_011246.3	5129	Rasgrp1	RAS guanyl releasing protein 1 (Rasgrp1). mRNA	4.49	-2.92	0.00067
NM_145079.3	3302	Ugt1a6a	UDP glucuronosyltransferase 1 family. polypeptide A6A (Ugt1a6a). mRNA	0.11	-71.08	0.00067
XM_017314318.3	6033	Myh1	myosin. heavy polypeptide 1. skeletal muscle. adult (Myh1). transcript variant X1. mRNA	0.03	300.17	0.00067
NM_001252153.1	1473	Tmem106c	transmembrane protein 106C (Tmem106c). transcript variant 2. mRNA	0.24	-26.79	0.00067
XM_036152286.1	4698	Mndal	myeloid nuclear differentiation antigen like (Mndal). transcript variant X10. mRNA	5.29	4.12	0.00067
XM_030253223.2	8249	Hp1bp3	heterochromatin protein 1. binding protein 3 (Hp1bp3). transcript variant X11. mRNA	0.02	208.79	0.00067
NM_001301281.1	3982	Agtrap	angiotensin II. type I receptor-associated protein (Agtrap). transcript variant 2. mRNA	0.13	46.5	0.00067
XM_006496637.4	899	Cd48	CD48 antigen (Cd48). transcript variant X2. mRNA	1.63	176	0.00067
NM_025779.3	1332	Mcub	mitochondrial calcium uniporter dominant negative beta subunit (Mcub). transcript variant 1. mRNA; nuclear gene for mitochondrial product	0.29	-189.49	0.00067
XM_006530752.5	1258	Mt1	metallothionein 1 (Mt1). transcript variant X1. mRNA	0.34	48.9	0.00068
NM_009924.4	4084	Cnr2	cannabinoid receptor 2 (macrophage) (Cnr2). transcript variant 1. mRNA	2.3	-5.84	0.00068
XM_006505352.4	4146	Cald1	caldesmon 1 (Cald1). transcript variant X15. mRNA	0.04	239.05	0.00068
XM_030249002.2	3874	Src	Rous sarcoma oncogene (Src). transcript variant X12. mRNA	0.06	314.86	0.00068
NM_001276425.1	3641	St6galnac4	ST6 (alpha-N-acetyl-neuraminyl-2.3-beta-galactosyl-1.3)-N-acetylgalactosaminide alpha-2.6-sialyltransferase 4 (St6galnac4). transcript variant 2. mRNA	1	5.14	0.00068
NM_007649.5	1205	Cd48	CD48 antigen (Cd48). transcript variant 1. mRNA	7.73	-3.04	0.00068
NM_016749.2	1856	Mybph	myosin binding protein H (Mybph). transcript variant 1. mRNA	2.04	27.12	0.00069
NM_001289619.1	2512	Zyx	zyxin (Zyx). transcript variant 3. mRNA	0.39	-259.32	0.00069
XM_036163283.1	5285	Srsf11	serine and arginine-rich splicing factor 11 (Srsf11). transcript variant X23. mRNA	0.26	165.49	0.00069
XM_030249820.2	5250	Map3k4	mitogen-activated protein kinase kinase kinase 4 (Map3k4). transcript variant X3. mRNA	0.03	206.22	0.00069
NM_183158.3	2735	Cyp2ab1	cytochrome P450. family 2. subfamily ab. polypeptide 1 (Cyp2ab1). mRNA	0.27	-17.59	0.00069
XM_017319410.2	3767	Sema4c	sema domain. immunoglobulin domain (Ig). transmembrane domain (TM) and short cytoplasmic domain. (semaphorin) 4C (Sema4c). transcript variant X10. mRNA	0.48	190.37	0.00069
NM_009477.3	1297	Upp1	uridine phosphorylase 1 (Upp1). transcript variant 1. mRNA	0.12	164.59	0.0007
XM_036162445.1	2945	Suv39h2	suppressor of variegation 3-9 2 (Suv39h2). transcript variant X1. mRNA	0.04	36.87	0.0007
NM_001379315.1	16502	Strbp	spermatid perinuclear RNA binding protein (Strbp). transcript variant 5. mRNA	0.04	-204.45	0.0007
XR_390319.3	3027	Elp1	elongator complex protein 1 (Elp1). transcript variant X1. misc_RNA	0.19	148.82	0.0007
NM_026514.3	2269	Cdc42ep3	CDC42 effector protein (Rho GTPase binding) 3 (Cdc42ep3). mRNA	1.98	-6.57	0.0007
NM_001286662.1	7078	Pdpk1	3-phosphoinositide dependent protein kinase 1 (Pdpk1). transcript variant 3. mRNA	0.15	211.77	0.0007
NM_001363159.1	1638	Afmid	arylformamidase (Afmid). transcript variant 2. mRNA	0.33	46.84	0.00071
XM_006514508.2	2462	Ewsr1	Ewing sarcoma breakpoint region 1 (Ewsr1). transcript variant X1. mRNA	2.12	47.27	0.00071
XM_006532882.2	7391	Chd3	chromodomain helicase DNA binding protein 3 (Chd3). transcript variant X4. mRNA	0.17	69.39	0.00071
XM_006538272.4	5317	Rbm12b1	RNA binding motif protein 12 B1 (Rbm12b1). transcript variant X3. mRNA	0.14	-22.2	0.00071
NM_009829.3	5772	Ccnd2	cyclin D2 (Ccnd2). mRNA	3.31	3.29	0.00072
XM_036165356.1	2596	Rabgef1	RAB guanine nucleotide exchange factor (GEF) 1 (Rabgef1). transcript variant X3. mRNA	0.43	165.28	0.00072
NM_178751.3	3851	Orai2	ORAI calcium release-activated calcium modulator 2 (Orai2). mRNA	2.73	-3.36	0.00072
XR_004940770.1	1511	Rbm17	RNA binding motif protein 17 (Rbm17). transcript variant X1. misc_RNA	0.17	136.93	0.00072
XR_001779856.2	3283	Pik3r6	phosphoinositide-3-kinase regulatory subunit 5 (Pik3r6). transcript variant X4. misc_RNA	0.12	190.4	0.00072
XM_006519722.1	3050	Fbxo34	F-box protein 34 (Fbxo34). transcript variant X15. mRNA	0.06	179.99	0.00072
NM_001190800.1	6634	Ddx19b	DEAD box helicase 19b (Ddx19b). transcript variant 3. mRNA	0.03	230.89	0.00072
NM_001357993.1	3472	Flywch1	FLYWCH-type zinc finger 1 (Flywch1). transcript variant 1. mRNA	0.17	-42.27	0.00072
XM_036163346.1	6673	Fndc3b	fibronectin type III domain containing 3B (Fndc3b). transcript variant X14. mRNA	0.09	-204.2	0.00072
NM_001370771.1	2759	Ifi44	interferon-induced protein 44 (Ifi44). transcript variant 2. mRNA	0.07	157.35	0.00072
XM_030254779.2	1606	Ociad1	OCIA domain containing 1 (Ociad1). transcript variant X7. mRNA	0.11	153.65	0.00073
XM_006517204.5	6210	Tifab	TRAF-interacting protein with forkhead-associated domain. family member B (Tifab). transcript variant X1. mRNA	0.19	-12.3	0.00073
NM_001005423.2	2493	Mreg	melanoregulin (Mreg). transcript variant 1. mRNA	0.26	9.18	0.00073
XM_030254114.2	12925	Cux1	cut-like homeobox 1 (Cux1). transcript variant X13. mRNA	0.01	202.6	0.00073
XM_030250424.1	6006	Pik3c3	phosphatidylinositol 3-kinase catalytic subunit type 3 (Pik3c3). transcript variant X1. mRNA	40.13	2.9	0.00073
XM_006527616.4	6492	Slc9a7	solute carrier family 9 (sodium/hydrogen exchanger). member 7 (Slc9a7). transcript variant X1. mRNA	0.54	-8.54	0.00073
XM_017321571.3	1598	Zc3hc1	zinc finger. C3HC type 1 (Zc3hc1). transcript variant X1. mRNA	0.24	192.27	0.00075
XM_017315943.2	4582	Tsc22d1	TSC22 domain family. member 1 (Tsc22d1). transcript variant X3. mRNA	0.13	-36.13	0.00075
NM_027222.3	928	Mzb1	marginal zone B and B1 cell-specific protein 1 (Mzb1). mRNA	6.32	-4.26	0.00075
NM_001039545.2	6083	Myh2	myosin. heavy polypeptide 2. skeletal muscle. adult (Myh2). mRNA	0.03	302.55	0.00075
XM_017313216.2	4051	Rbm6	RNA binding motif protein 6 (Rbm6). transcript variant X3. mRNA	0.1	179.9	0.00075
XM_017315139.2	5438	Mpp5	membrane protein. palmitoylated 5 (MAGUK p55 subfamily member 5) (Mpp5). transcript variant X4. mRNA	0.12	191.89	0.00075
NM_007987.2	1486	Fas	Fas (TNF receptor superfamily member 6) (Fas). transcript variant 1. mRNA	4.01	4.27	0.00076
NM_027290.3	3510	Mcm10	minichromosome maintenance 10 replication initiation factor (Mcm10). transcript variant 2. mRNA	0.43	7.51	0.00077
XR_004934903.1	6978	N4bp1	NEDD4 binding protein 1 (N4bp1). transcript variant X5. misc_RNA	1.05	7.93	0.00078
NM_010734.2	418	Lst1	leukocyte specific transcript 1 (Lst1). mRNA	21.22	-3.85	0.00078
XM_036162906.1	11861	Kcna2	potassium voltage-gated channel. shaker-related subfamily. member 2 (Kcna2). transcript variant X6. mRNA	0.05	-184.64	0.00078
NM_001361966.1	5262	Herc3	hect domain and RLD 3 (Herc3). transcript variant 1. mRNA	0.1	44.59	0.00079
NM_001177399.1	3345	Zfp971	zinc finger protein 971 (Zfp971). transcript variant 1. mRNA	1	-5.4	0.0008
XM_036156420.1	8088	Per1	period circadian clock 1 (Per1). transcript variant X4. mRNA	0.54	21.44	0.0008
XM_036158762.1	7695	Sfmbt1	Scm-like with four mbt domains 1 (Sfmbt1). transcript variant X7. mRNA	0.09	174.88	0.0008
NM_178901.3	1918	AI467606	expressed sequence AI467606 (AI467606). mRNA	3.61	-5.29	0.0008
XM_011242702.3	2323	Parp16	poly (ADP-ribose) polymerase family. member 16 (Parp16). transcript variant X1. mRNA	0.07	151.51	0.00081
XM_011241841.1	8895	Gvin3	GTPase. very large interferon inducible. family member 3 (Gvin3). transcript variant X2. mRNA	0.02	224.24	0.00081
XM_036152412.1	1801	Gpnmb	glycoprotein (transmembrane) nmb (Gpnmb). transcript variant X1. mRNA	0.09	172.85	0.00081
XM_036158065.1	4507	Fgd3	FYVE. RhoGEF and PH domain containing 3 (Fgd3). transcript variant X4. mRNA	3.25	-2.96	0.00082
XM_036152556.1	3753	Sbk1	SH3-binding kinase 1 (Sbk1). transcript variant X1. mRNA	2.98	-3.7	0.00083
NR_105808.1	104	Mir6386	microRNA 6386 (Mir6386). microRNA	8.3	30.88	0.00083
XM_036158433.1	5537	Dach1	dachshund family transcription factor 1 (Dach1). transcript variant X1. mRNA	0.11	171.51	0.00083
XM_006515026.5	7168	Itsn2	intersectin 2 (Itsn2). transcript variant X8. mRNA	0.02	263.84	0.00083
NM_145996.4	5525	Arid5a	AT rich interactive domain 5A (MRF1-like) (Arid5a). transcript variant 3. mRNA	1.85	7.5	0.00083
NM_013508.2	4234	Elk3	ELK3. member of ETS oncogene family (Elk3). transcript variant 1. mRNA	1.63	-3.47	0.00083
NM_009677.6	6891	Ap1g1	adaptor protein complex AP-1. gamma 1 subunit (Ap1g1). transcript variant 1. mRNA	0.05	239.15	0.00083
NM_001045514.3	5480	Akna	AT-hook transcription factor (Akna). transcript variant 1. mRNA	6.03	-3.64	0.00083
XM_036161515.1	5500	Phf20	PHD finger protein 20 (Phf20). transcript variant X5. mRNA	0.07	178.79	0.00083
NM_001290475.1	3658	Tdrd7	tudor domain containing 7 (Tdrd7). transcript variant 1. mRNA	0.06	284.15	0.00083
XR_001785517.1	2874	Pgghg	protein glucosylgalactosylhydroxylysine glucosidase (Pgghg). transcript variant X5. misc_RNA	0.12	178.71	0.00083
XM_036163390.1	5044	Atp11b	ATPase. class VI. type 11B (Atp11b). transcript variant X1. mRNA	0.04	214.28	0.00083
XR_003950031.2	4150	Dnajc27	DnaJ heat shock protein family (Hsp40) member C27 (Dnajc27). transcript variant X12. misc_RNA	0.05	216.21	0.00083
NM_001347125.1	5039	Vamp4	vesicle-associated membrane protein 4 (Vamp4). transcript variant 2. mRNA	0.25	170.11	0.00083
XM_006535371.1	1487	Sirpb1c	signal-regulatory protein beta 1C (Sirpb1c). transcript variant X1. mRNA	1.08	-13.08	0.00084
XM_036162571.1	5635	Fmnl2	formin-like 2 (Fmnl2). transcript variant X7. mRNA	0.42	14.4	0.00084
NM_001111267.2	2783	Ncoa7	nuclear receptor coactivator 7 (Ncoa7). transcript variant 2. mRNA	0.62	12.25	0.00084
NM_009898.3	1686	Coro1a	coronin. actin binding protein 1A (Coro1a). transcript variant 2. mRNA	80.54	-2.55	0.00084
NM_001122896.2	4654	Hp1bp3	heterochromatin protein 1. binding protein 3 (Hp1bp3). transcript variant 3. mRNA	0.03	184.36	0.00085
NM_213614.2	2155	Septin5	septin 5 (Septin5). mRNA	2.13	5.25	0.00085
XM_006540171.5	2871	Myadm	myeloid-associated differentiation marker (Myadm). transcript variant X1. mRNA	1.54	-14.25	0.00086
XR_001784295.1	213	Gm46854	predicted gene. 46854 (Gm46854). ncRNA	2.2	125.55	0.00087
XM_006516940.5	1305	Susd3	sushi domain containing 3 (Susd3). transcript variant X4. mRNA	0.33	-161.19	0.00087
NM_146184.4	1867	B3gnt8	UDP-GlcNAc:betaGal beta-1.3-N-acetylglucosaminyltransferase 8 (B3gnt8). transcript variant 1. mRNA	1.28	-8.25	0.00087
XM_011241644.3	7070	Arrb1	arrestin. beta 1 (Arrb1). transcript variant X3. mRNA	0.09	213.4	0.00088
XM_006522652.4	2843	Parn	poly(A)-specific ribonuclease (deadenylation nuclease) (Parn). transcript variant X1. mRNA	0.11	173.76	0.00088
XR_003953678.1	2469	Uqcc1	ubiquinol-cytochrome c reductase complex assembly factor 1 (Uqcc1). transcript variant X5. misc_RNA	0.06	183	0.00088
NM_133732.3	2616	4931406C07Rik	RIKEN cDNA 4931406C07 gene (4931406C07Rik). transcript variant 3. mRNA	0.07	187.53	0.00088
XM_017322037.3	2949	Pira1	paired-Ig-like receptor A1 (Pira1). transcript variant X2. mRNA	0.19	42.06	0.00088
NM_026062.4	2724	Dipk1a	divergent protein kinase domain 1A (Dipk1a). mRNA	1.72	-4.02	0.00089
NM_001347654.2	1925	Cd300a	CD300A molecule (Cd300a). transcript variant 2. mRNA	1.36	-10.46	0.0009
XR_004941417.1	3185	Ubqln4	ubiquilin 4 (Ubqln4). transcript variant X3. misc_RNA	0.51	34.12	0.0009
XM_011245023.4	1469	Phf11a	PHD finger protein 11A (Phf11a). transcript variant X1. mRNA	0.89	13.42	0.0009
XM_006499141.4	4642	Rassf2	Ras association (RalGDS/AF-6) domain family member 2 (Rassf2). transcript variant X3. mRNA	3.97	-3.58	0.0009
XM_006498325.3	2079	Kynu	kynureninase (Kynu). transcript variant X1. mRNA	0.21	-166.54	0.0009
XM_006495836.5	7883	Phf3	PHD finger protein 3 (Phf3). transcript variant X1. mRNA	0.1	-203.25	0.0009
XM_006539716.4	6157	Zfp526	zinc finger protein 526 (Zfp526). transcript variant X3. mRNA	0.11	53.68	0.0009
NM_183162.2	10124	Helz2	helicase with zinc finger 2. transcriptional coactivator (Helz2). mRNA	7.82	2.64	0.00091
NM_009376.2	3097	Ift88	intraflagellar transport 88 (Ift88). mRNA	0.13	-37.39	0.00091
NM_008380.2	6403	Inhba	inhibin beta-A (Inhba). mRNA	0.35	7.74	0.00092
NM_001271631.1	5724	Runx2	runt related transcription factor 2 (Runx2). transcript variant 6. mRNA	0.03	69.83	0.00092
NM_001159485.2	5170	Mcf2l	mcf.2 transforming sequence-like (Mcf2l). transcript variant 3. mRNA	0.03	238.54	0.00093
XM_006520445.3	1996	Xrcc6	X-ray repair complementing defective repair in Chinese hamster cells 6 (Xrcc6). transcript variant X5. mRNA	0.09	208.88	0.00093
NM_001355567.1	2614	Cdk11b	cyclin-dependent kinase 11B (Cdk11b). transcript variant 3. mRNA	0.16	-164.2	0.00093
NM_207648.2	2118	H2-Q6	histocompatibility 2. Q region locus 6 (H2-Q6). transcript variant 2. mRNA	21.46	3.03	0.00094
NM_001159965.1	6992	Ralgps2	Ral GEF with PH domain and SH3 binding motif 2 (Ralgps2). transcript variant 1. mRNA	0.25	-24.34	0.00096
NR_045507.1	1123	4933412O06Rik	RIKEN cDNA 4933412O06 gene (4933412O06Rik). long non-coding RNA	0.13	99.79	0.00096
NM_001362845.1	7563	Dgke	diacylglycerol kinase. epsilon (Dgke). transcript variant 2. mRNA	0.08	161.05	0.00099
NM_001036740.2	1475	B3gnt8	UDP-GlcNAc:betaGal beta-1.3-N-acetylglucosaminyltransferase 8 (B3gnt8). transcript variant 2. mRNA	0.54	-12.7	0.001
NM_001284521.1	6527	Larp4	La ribonucleoprotein domain family. member 4 (Larp4). transcript variant 3. mRNA	0.03	235.29	0.001
XM_006514510.4	2659	Ewsr1	Ewing sarcoma breakpoint region 1 (Ewsr1). transcript variant X3. mRNA	0.95	170.4	0.001
NM_001242407.1	3394	Miga2	mitoguardin 2 (Miga2). transcript variant 2. mRNA	0.12	-161.43	0.001
NM_013674.2	4762	Irf4	interferon regulatory factor 4 (Irf4). transcript variant 1. mRNA	2.82	3.43	0.001
XM_006501237.4	2546	Tifa	TRAF-interacting protein with forkhead-associated domain (Tifa). transcript variant X2. mRNA	0.77	8.78	0.001
XM_006497813.5	7979	Sptan1	spectrin alpha. non-erythrocytic 1 (Sptan1). transcript variant X4. mRNA	0.02	206.76	0.001
XM_011250335.4	2133	Ints11	integrator complex subunit 11 (Ints11). transcript variant X2. mRNA	0.13	168.24	0.001
NM_001377091.1	5757	Otud3	OTU domain containing 3 (Otud3). transcript variant 4. mRNA	0.02	160.19	0.001
XM_017319423.3	4289	Zzz3	zinc finger. ZZ domain containing 3 (Zzz3). transcript variant X3. mRNA	0.28	-33.1	0.001
XM_036163659.1	5274	Eya3	EYA transcriptional coactivator and phosphatase 3 (Eya3). transcript variant X3. mRNA	0.12	-179.65	0.0011
XM_006507887.4	2984	Polr3e	polymerase (RNA) III (DNA directed) polypeptide E (Polr3e). transcript variant X4. mRNA	0.11	189.61	0.0011
XM_006522343.1	2803	Tnk2	tyrosine kinase. non-receptor. 2 (Tnk2). transcript variant X21. mRNA	0.06	152.01	0.0011
XM_017318453.3	2999	Tfe3	transcription factor E3 (Tfe3). transcript variant X1. mRNA	0.22	-138.91	0.0011
XM_017312909.2	7303	Mast3	microtubule associated serine/threonine kinase 3 (Mast3). transcript variant X4. mRNA	0.06	-68.86	0.0011
XM_036155029.1	1896	Jaml	junction adhesion molecule like (Jaml). transcript variant X6. mRNA	0.11	197.69	0.0011
NM_001384118.1	6500	Zfyve9	zinc finger. FYVE domain containing 9 (Zfyve9). transcript variant 3. mRNA	0.08	-166.37	0.0011
NM_178658.5	3161	Ripor2	RHO family interacting cell polarization regulator 2 (Ripor2). transcript variant 3. mRNA	5.08	-2.97	0.0011
XM_006539667.2	2356	Shkbp1	Sh3kbp1 binding protein 1 (Shkbp1). transcript variant X1. mRNA	0.33	-20.3	0.0011
NM_001359656.1	1950	Arhgap9	Rho GTPase activating protein 9 (Arhgap9). transcript variant 3. mRNA	4.6	-5.55	0.0011
NM_001290457.1	2194	Relb	avian reticuloendotheliosis viral (v-rel) oncogene related B (Relb). transcript variant 2. mRNA	1.04	29.15	0.0011
NR_152146.1	1576	Ppcdc	phosphopantothenoylcysteine decarboxylase (Ppcdc). transcript variant 10. non-coding RNA	0.14	192.77	0.0011
NM_145832.3	2666	Slc35c1	solute carrier family 35. member C1 (Slc35c1). transcript variant 2. mRNA	1.2	-6.19	0.0011
NM_001164075.1	1720	Tgif1	TGFB-induced factor homeobox 1 (Tgif1). transcript variant 1. mRNA	0.09	148.2	0.0011
NM_001379305.1	3986	Fbxo11	F-box protein 11 (Fbxo11). transcript variant 5. mRNA	0.05	257.33	0.0011
XM_006525673.3	7925	Ndst1	N-deacetylase/N-sulfotransferase (heparan glucosaminyl) 1 (Ndst1). transcript variant X8. mRNA	0.12	-27.13	0.0011
NM_001252656.2	3645	Kcnab2	potassium voltage-gated channel. shaker-related subfamily. beta member 2 (Kcnab2). transcript variant 1. mRNA	0.53	-17.33	0.0011
XM_036164988.1	8020	Hip1	huntingtin interacting protein 1 (Hip1). transcript variant X5. mRNA	0.08	-224.08	0.0011
XM_017314609.2	2346	Cep95	centrosomal protein 95 (Cep95). transcript variant X4. mRNA	0.09	166.7	0.0011
XM_036158525.1	3913	Ptk2b	PTK2 protein tyrosine kinase 2 beta (Ptk2b). transcript variant X6. mRNA	0.26	158.65	0.0011
XM_006504000.5	2486	Pisd	phosphatidylserine decarboxylase (Pisd). transcript variant X3. mRNA	0.57	-13.91	0.0011
XR_880214.3	3789	Gm38483	predicted gene. 38483 (Gm38483). transcript variant X3. ncRNA	0.08	97.86	0.0011
XR_875668.4	2849	Gm35853	predicted gene. 35853 (Gm35853). transcript variant X1. ncRNA	0.29	-30.6	0.0012
NM_013655.4	3173	Cxcl12	chemokine (C-X-C motif) ligand 12 (Cxcl12). transcript variant 2. mRNA	0.1	23.38	0.0012
NM_001285412.1	3046	Calu	calumenin (Calu). transcript variant 3. mRNA	0.07	250.46	0.0012
XM_036159785.1	3936	Hira	histone cell cycle regulator (Hira). transcript variant X6. mRNA	0.17	165.06	0.0012
NM_001359601.1	5893	Bend3	BEN domain containing 3 (Bend3). transcript variant 3. mRNA	0.02	200.77	0.0012
XM_036157106.1	2311	Dhx58	DEXH (Asp-Glu-X-His) box polypeptide 58 (Dhx58). transcript variant X1. mRNA	0.59	34.92	0.0012
NM_028466.2	2666	C9orf72	C9orf72. member of C9orf72-SMCR8 complex (C9orf72). transcript variant 2. mRNA	0.06	32.88	0.0012
XM_006523447.3	5091	Dhx57	DEAH (Asp-Glu-Ala-Asp/His) box polypeptide 57 (Dhx57). transcript variant X1. mRNA	0.12	-35.32	0.0012
NM_009151.3	2604	Selplg	selectin. platelet (p-selectin) ligand (Selplg). mRNA	5.05	-3.25	0.0012
NM_199143.2	2610	Znrf2	zinc and ring finger 2 (Znrf2). mRNA	3.53	-3.05	0.0012
NM_007648.5	1457	Cd3e	CD3 antigen. epsilon polypeptide (Cd3e). mRNA	11.49	-2.9	0.0012
NM_178892.5	4154	Tiparp	TCDD-inducible poly(ADP-ribose) polymerase (Tiparp). mRNA	3.21	2.96	0.0012
XM_036162409.1	4139	B4galt5	UDP-Gal:betaGlcNAc beta 1.4-galactosyltransferase. polypeptide 5 (B4galt5). transcript variant X1. mRNA	0.88	17.13	0.0012
XM_036157921.1	8180	Rasgrf2	RAS protein-specific guanine nucleotide-releasing factor 2 (Rasgrf2). transcript variant X1. mRNA	0.11	-36.16	0.0012
NM_001190310.1	784	Clec4b1	C-type lectin domain family 4. member b1 (Clec4b1). transcript variant 1. mRNA	0.41	-42.64	0.0012
NM_010189.3	1738	Fcgrt	Fc receptor. IgG. alpha chain transporter (Fcgrt). transcript variant 1. mRNA	1.85	-5.5	0.0012
XM_006499430.3	5678	Zfp217	zinc finger protein 217 (Zfp217). transcript variant X4. mRNA	0.04	205.7	0.0013
XR_003952779.1	10032	Helz2	helicase with zinc finger 2. transcriptional coactivator (Helz2). transcript variant X3. misc_RNA	2.52	6.39	0.0013
NM_001101433.2	4587	Zcchc24	zinc finger. CCHC domain containing 24 (Zcchc24). mRNA	0.78	-4.92	0.0013
NM_001291142.1	5320	Rabep1	rabaptin. RAB GTPase binding effector protein 1 (Rabep1). transcript variant 3. mRNA	0.04	180.56	0.0013
XM_011242455.3	6418	Zfp26	zinc finger protein 26 (Zfp26). transcript variant X3. mRNA	0.13	154.85	0.0013
XM_011246980.3	3160	Iigp1	interferon inducible GTPase 1 (Iigp1). transcript variant X6. mRNA	0.18	35.27	0.0013
NM_001358950.1	8813	Cbx5	chromobox 5 (Cbx5). transcript variant 4. mRNA	0.06	151.81	0.0013
XM_036164707.1	14572	Akap9	A kinase (PRKA) anchor protein (yotiao) 9 (Akap9). transcript variant X6. mRNA	0.02	202.57	0.0013
XM_030247398.2	8400	Rreb1	ras responsive element binding protein 1 (Rreb1). transcript variant X16. mRNA	0.05	-38.33	0.0013
XM_006496675.4	2411	Ifi204	interferon activated gene 204 (Ifi204). transcript variant X1. mRNA	0.09	154.6	0.0013
XM_006523863.5	6548	Eif2ak2	eukaryotic translation initiation factor 2-alpha kinase 2 (Eif2ak2). transcript variant X1. mRNA	0.43	14.77	0.0013
XR_004938805.1	2030	Mfng	MFNG O-fucosylpeptide 3-beta-N-acetylglucosaminyltransferase (Mfng). transcript variant X3. misc_RNA	0.8	-15.15	0.0013
NM_009139.3	1436	Ccl6	chemokine (C-C motif) ligand 6 (Ccl6). mRNA	27.38	-2.99	0.0013
XM_006501724.3	2728	Gbp3	guanylate binding protein 3 (Gbp3). transcript variant X2. mRNA	0.05	178.57	0.0013
XM_036158086.1	4086	Zscan26	zinc finger and SCAN domain containing 26 (Zscan26). transcript variant X2. mRNA	0.36	23.74	0.0013
NM_001281816.1	2421	Sec23b	SEC23 homolog B. COPII coat complex component (Sec23b). transcript variant 5. mRNA	0.19	186.63	0.0014
NM_001122596.1	3044	P2ry10b	purinergic receptor P2Y. G-protein coupled 10B (P2ry10b). transcript variant 1. mRNA	0.3	-14.78	0.0014
XM_030250785.1	2938	Rasgrp2	RAS. guanyl releasing protein 2 (Rasgrp2). transcript variant X10. mRNA	0.39	27.31	0.0014
NM_020044.3	1672	Lat2	linker for activation of T cells family. member 2 (Lat2). transcript variant 1. mRNA	3.2	-5.6	0.0014
NM_009860.3	1945	Cdc25c	cell division cycle 25C (Cdc25c). mRNA	0.19	120.77	0.0014
NM_016969.2	2805	Myadm	myeloid-associated differentiation marker (Myadm). transcript variant 4. mRNA	3.36	-6.08	0.0014
XM_006531678.5	4110	Pcx	pyruvate carboxylase (Pcx). transcript variant X1. mRNA	0.05	234.74	0.0014
XR_003952826.2	4793	Ccdc88b	coiled-coil domain containing 88B (Ccdc88b). transcript variant X3. misc_RNA	4.56	23.76	0.0014
NM_001271464.1	3084	Gfm2	G elongation factor. mitochondrial 2 (Gfm2). transcript variant 4. mRNA; nuclear gene for mitochondrial product	0.04	177.47	0.0014
XM_036162455.1	6221	Sppl2a	signal peptide peptidase like 2A (Sppl2a). transcript variant X2. mRNA	0.04	207.08	0.0014
XM_011240452.3	8143	Hivep3	human immunodeficiency virus type I enhancer binding protein 3 (Hivep3). transcript variant X4. mRNA	0.02	154.36	0.0014
NM_134034.3	5039	Ppp4r3b	protein phosphatase 4 regulatory subunit 3B (Ppp4r3b). transcript variant 1. mRNA	1.81	-13.25	0.0014
NM_013654.3	912	Ccl7	chemokine (C-C motif) ligand 7 (Ccl7). mRNA	1.2	9.51	0.0014
NM_001290987.1	4131	Wdr76	WD repeat domain 76 (Wdr76). transcript variant 3. mRNA	0.11	143.15	0.0014
NM_001291162.1	4168	Znfx1	zinc finger. NFX1-type containing 1 (Znfx1). transcript variant 2. mRNA	1.38	4.72	0.0014
XM_030243187.1	1337	Trim30c	tripartite motif-containing 30C (Trim30c). transcript variant X1. mRNA	0.46	17.15	0.0014
NM_001355160.1	3574	Sirpa	signal-regulatory protein alpha (Sirpa). transcript variant 9. mRNA	4.49	-7.59	0.0014
XM_006532535.5	1402	Btnl10	butyrophilin-like 10 (Btnl10). transcript variant X4. mRNA	0.19	28.92	0.0015
XM_011248213.4	4505	Kdm2b	lysine (K)-specific demethylase 2B (Kdm2b). transcript variant X8. mRNA	0.32	28.28	0.0015
XM_030247859.1	8420	Ercc6	excision repair cross-complementing rodent repair deficiency. complementation group 6 (Ercc6). transcript variant X5. mRNA	0.02	133.27	0.0015
XM_030250960.2	3949	Add3	adducin 3 (gamma) (Add3). transcript variant X3. mRNA	5.06	-3.42	0.0015
NM_146189.3	3624	Mybpc2	myosin binding protein C. fast-type (Mybpc2). mRNA	2.59	5.63	0.0015
XR_003948840.2	1587	Gm26740	predicted gene. 26740 (Gm26740). transcript variant X17. ncRNA	1.19	-18.8	0.0015
XM_006537554.2	10348	Abca1	ATP-binding cassette. sub-family A (ABC1). member 1 (Abca1). transcript variant X1. mRNA	0.02	71.69	0.0015
XM_017315921.3	2908	Ppp3cb	protein phosphatase 3. catalytic subunit. beta isoform (Ppp3cb). transcript variant X5. mRNA	0.05	194.48	0.0015
NM_007800.2	1015	Ctsg	cathepsin G (Ctsg). mRNA	0.22	18.75	0.0015
NM_001100452.1	6579	Bicral	BRD4 interacting chromatin remodeling complex associated protein like (Bicral). mRNA	0.09	-45.51	0.0015
NM_001357474.1	4927	Eprs	glutamyl-prolyl-tRNA synthetase (Eprs). transcript variant 2. mRNA	0.04	225.76	0.0015
NM_172825.3	2701	Adgrg7	adhesion G protein-coupled receptor G7 (Adgrg7). mRNA	0.08	17.58	0.0015
XM_030255513.1	2223	Snd1	staphylococcal nuclease and tudor domain containing 1 (Snd1). transcript variant X2. mRNA	0.12	43.36	0.0015
XR_004942516.1	3357	Oas2	2'-5' oligoadenylate synthetase 2 (Oas2). transcript variant X3. misc_RNA	0.84	10.32	0.0015
XM_036154908.1	4043	Mindy2	MINDY lysine 48 deubiquitinase 2 (Mindy2). transcript variant X3. mRNA	0.05	39.97	0.0015
XM_006515048.2	6058	Asap2	ArfGAP with SH3 domain. ankyrin repeat and PH domain 2 (Asap2). transcript variant X2. mRNA	0.03	195.86	0.0015
XM_036165157.1	7613	Mphosph9	M-phase phosphoprotein 9 (Mphosph9). transcript variant X10. mRNA	0.07	-161.89	0.0015
NM_001310452.1	5626	Mapk8	mitogen-activated protein kinase 8 (Mapk8). transcript variant 2. mRNA	0.08	-141.82	0.0015
XR_004942189.1	2218	Gm32908	predicted gene. 32908 (Gm32908). transcript variant X2. ncRNA	0.12	-28.69	0.0015
NM_013488.3	3086	Cd4	CD4 antigen (Cd4). mRNA	4.9	-3.02	0.0015
NR_126506.1	7155	Mdm4	transformed mouse 3T3 cell double minute 4 (Mdm4). transcript variant S. non-coding RNA	0.1	62.61	0.0015
NM_009423.4	3016	Traf4	TNF receptor associated factor 4 (Traf4). mRNA	2.33	3.4	0.0015
NM_011452.3	1959	Serpinb9b	serine (or cysteine) peptidase inhibitor. clade B. member 9b (Serpinb9b). mRNA	1.16	5.95	0.0015
XM_006496952.4	2771	Ncstn	nicastrin (Ncstn). transcript variant X1. mRNA	0.06	223.14	0.0016
NM_028732.4	4846	Vsir	V-set immunoregulatory receptor (Vsir). transcript variant 1. mRNA	5.58	-2.96	0.0016
NM_001357515.1	1837	Mybph	myosin binding protein H (Mybph). transcript variant 2. mRNA	1.34	24.28	0.0016
XM_006512735.5	4769	L3mbtl3	L3MBTL3 histone methyl-lysine binding protein (L3mbtl3). transcript variant X3. mRNA	0.16	-28.01	0.0016
NM_009351.2	8163	Tep1	telomerase associated protein 1 (Tep1). mRNA	0.39	-6	0.0016
NM_009367.4	5116	Tgfb2	transforming growth factor. beta 2 (Tgfb2). transcript variant 1. mRNA	0.06	-37.72	0.0016
NM_174868.4	5355	Miga1	mitoguardin 1 (Miga1). transcript variant 1. mRNA	0.08	-140.63	0.0016
NM_008327.2	1796	Ifi202b	interferon activated gene 202B (Ifi202b). transcript variant 1. mRNA	5.22	4.26	0.0016
XR_380377.4	5737	Pip5k1c	phosphatidylinositol-4-phosphate 5-kinase. type 1 gamma (Pip5k1c). transcript variant X2. misc_RNA	0.15	128.33	0.0016
NM_010190.1	1062	Fcnb	ficolin B (Fcnb). mRNA	0.26	22.52	0.0016
XR_878767.4	8137	Phkb	phosphorylase kinase beta (Phkb). transcript variant X1. misc_RNA	0.1	129.45	0.0016
XM_030244732.2	3349	Rbm5	RNA binding motif protein 5 (Rbm5). transcript variant X2. mRNA	0.17	151.66	0.0016
NM_001114328.2	3033	Ccpg1	cell cycle progression 1 (Ccpg1). transcript variant 1. mRNA	2.85	-3.88	0.0016
NM_001381872.1	3305	Cc2d1a	coiled-coil and C2 domain containing 1A (Cc2d1a). transcript variant 3. mRNA	0.16	152.6	0.0016
NM_001093757.1	5200	Ogfod1	2-oxoglutarate and iron-dependent oxygenase domain containing 1 (Ogfod1). transcript variant 2. mRNA	0.06	136.87	0.0016
NM_001347448.1	3957	Oas2	2'-5' oligoadenylate synthetase 2 (Oas2). transcript variant 1. mRNA	0.19	25.88	0.0016
XM_036155367.1	3027	Taf1d	TATA-box binding protein associated factor. RNA polymerase I. D (Taf1d). transcript variant X2. mRNA	0.37	136.1	0.0016
NM_172988.4	2563	Fbxl4	F-box and leucine-rich repeat protein 4 (Fbxl4). transcript variant 1. mRNA	0.15	-136.83	0.0016
XM_001480210.5	3791	Gm6958	predicted gene 6958 (Gm6958). mRNA	1.84	3.98	0.0016
XM_036155736.1	4809	Sbno2	strawberry notch 2 (Sbno2). transcript variant X6. mRNA	0.15	144.57	0.0016
XM_036156481.1	2720	Slfn4	schlafen 4 (Slfn4). transcript variant X5. mRNA	3.05	5.89	0.0017
NM_001077404.1	6724	Nrp2	neuropilin 2 (Nrp2). transcript variant 2. mRNA	0.03	98.64	0.0017
XM_006521664.4	3827	Zc3h7a	zinc finger CCCH type containing 7 A (Zc3h7a). transcript variant X1. mRNA	0.05	214.53	0.0017
XR_869427.2	1529	Gm24175	predicted gene. 24175 (Gm24175). transcript variant X1. ncRNA	0.23	-19.79	0.0017
NM_177736.3	2932	Lrrc61	leucine rich repeat containing 61 (Lrrc61). transcript variant 1. mRNA	0.16	-145.45	0.0017
XM_006523201.2	5193	Rps6ka2	ribosomal protein S6 kinase. polypeptide 2 (Rps6ka2). transcript variant X4. mRNA	0.02	136.11	0.0017
XM_017319689.1	1538	Sirpb1b	signal-regulatory protein beta 1B (Sirpb1b). transcript variant X2. mRNA	0.26	-141.51	0.0017
XM_006534295.3	2058	Strada	STE20-related kinase adaptor alpha (Strada). transcript variant X5. mRNA	0.13	143.75	0.0017
NM_001357117.1	1750	Fcgrt	Fc receptor. IgG. alpha chain transporter (Fcgrt). transcript variant 2. mRNA	0.4	-19.74	0.0017
XM_011250512.4	8283	Arhgap35	Rho GTPase activating protein 35 (Arhgap35). transcript variant X1. mRNA	0.04	153.22	0.0017
XM_011249275.4	4497	Rps6kb1	ribosomal protein S6 kinase. polypeptide 1 (Rps6kb1). transcript variant X1. mRNA	0.03	161.66	0.0017
NR_045537.1	2685	Spns1	spinster homolog 1 (Spns1). transcript variant 2. non-coding RNA	0.21	134.78	0.0017
NM_001357359.1	3075	Jhy	junctional cadherin complex regulator (Jhy). transcript variant 1. mRNA	0.42	-16.41	0.0017
NM_029005.3	2007	Mlkl	mixed lineage kinase domain-like (Mlkl). transcript variant 2. mRNA	0.14	24	0.0017
NM_007758.3	6210	Cr2	complement receptor 2 (Cr2). transcript variant 2. mRNA	0.57	-16.99	0.0017
XM_006529236.4	2332	Ncf2	neutrophil cytosolic factor 2 (Ncf2). transcript variant X1. mRNA	15.6	-2.9	0.0017
NR_027990.1	1815	Enoph1	enolase-phosphatase 1 (Enoph1). transcript variant 3. non-coding RNA	0.31	36.23	0.0017
XM_017312341.3	4636	Xpo6	exportin 6 (Xpo6). transcript variant X1. mRNA	0.46	144.32	0.0017
XM_030245625.1	2047	Timd2	T cell immunoglobulin and mucin domain containing 2 (Timd2). transcript variant X2. mRNA	0.09	43.35	0.0017
XM_006519309.4	3319	Actr8	ARP8 actin-related protein 8 (Actr8). transcript variant X1. mRNA	0.13	-19.02	0.0017
NM_001360899.1	1329	Hes6	hairy and enhancer of split 6 (Hes6). transcript variant 2. mRNA	0.09	160.89	0.0017
NM_029847.4	3657	Arsk	arylsulfatase K (Arsk). transcript variant 1. mRNA	0.12	-33.05	0.0017
XR_004934795.1	3845	Evi5l	ecotropic viral integration site 5 like (Evi5l). transcript variant X4. misc_RNA	0.05	140.79	0.0017
NM_001378868.1	2338	Pkm	pyruvate kinase. muscle (Pkm). transcript variant 5. mRNA	0.09	141.85	0.0017
XM_011239577.4	2460	Slc28a2	solute carrier family 28 (sodium-coupled nucleoside transporter). member 2 (Slc28a2). transcript variant X4. mRNA	0.54	-11.59	0.0017
XR_876037.1	642	Gm41447	predicted gene. 41447 (Gm41447). ncRNA	0.15	38.34	0.0017
NM_001013365.2	1907	Osm	oncostatin M (Osm). mRNA	2.83	4.42	0.0018
XM_006499305.3	1408	Sdcbp2	syndecan binding protein (syntenin) 2 (Sdcbp2). transcript variant X2. mRNA	0.09	99.72	0.0018
NR_166136.1	4358	Llgl1	LLGL1 scribble cell polarity complex component (Llgl1). transcript variant 7. non-coding RNA	0.08	173.15	0.0018
NM_178650.3	1781	Tbc1d10c	TBC1 domain family. member 10c (Tbc1d10c). mRNA	9.73	-5.49	0.0018
NM_001164717.1	10380	Sh3pxd2a	SH3 and PX domains 2A (Sh3pxd2a). transcript variant 2. mRNA	0.01	136.68	0.0018
NM_007609.3	1443	Casp4	caspase 4. apoptosis-related cysteine peptidase (Casp4). transcript variant 1. mRNA	3.97	6.08	0.0018
XR_004939163.1	7033	Cd47	CD47 antigen (Rh-related antigen. integrin-associated signal transducer) (Cd47). transcript variant X6. misc_RNA	0.26	43.62	0.0018
XR_390546.5	15030	Gm32208	predicted gene. 32208 (Gm32208). transcript variant X2. ncRNA	0.01	209.96	0.0018
NM_028072.5	3790	Sulf2	sulfatase 2 (Sulf2). transcript variant 2. mRNA	0.56	-16.38	0.0018
XM_011238737.3	10857	Abl2	v-abl Abelson murine leukemia viral oncogene 2 (arg. Abelson-related gene) (Abl2). transcript variant X1. mRNA	0.1	-48.89	0.0018
NM_001145929.1	1031	Thap3	THAP domain containing. apoptosis associated protein 3 (Thap3). transcript variant 2. mRNA	0.37	117.69	0.0018
NM_001289520.1	2766	Anapc5	anaphase-promoting complex subunit 5 (Anapc5). transcript variant 6. mRNA	0.16	-141.74	0.0018
NR_149254.1	1662	Bcl2l1	BCL2-like 1 (Bcl2l1). transcript variant 6. non-coding RNA	1.66	53.68	0.0018
XM_006532353.5	3209	Lig3	ligase III. DNA. ATP-dependent (Lig3). transcript variant X3. mRNA	0.06	138.91	0.0018
XM_036166258.1	8360	Kdm7a	lysine (K)-specific demethylase 7A (Kdm7a). transcript variant X1. mRNA	1.93	21.29	0.0018
NM_001359181.1	2847	Oasl2	2'-5' oligoadenylate synthetase-like 2 (Oasl2). transcript variant 2. mRNA	0.43	21.66	0.0018
XM_030252338.1	4043	Sema4c	sema domain. immunoglobulin domain (Ig). transmembrane domain (TM) and short cytoplasmic domain. (semaphorin) 4C (Sema4c). transcript variant X5. mRNA	0.35	70.99	0.0018
NR_033261.1	2245	Prr33	proline rich 33 (Prr33). long non-coding RNA	1.9	-4.46	0.0018
NM_201607.2	3203	Pde4c	phosphodiesterase 4C. cAMP specific (Pde4c). transcript variant 2. mRNA	0.13	131.99	0.0018
XM_036153108.1	1482	Siglecg	sialic acid binding Ig-like lectin G (Siglecg). transcript variant X3. mRNA	0.09	161.07	0.0018
XM_006535225.5	14083	Wdfy3	WD repeat and FYVE domain containing 3 (Wdfy3). transcript variant X7. mRNA	0.02	73.36	0.0018
XM_006495804.3	4416	Sema4c	sema domain. immunoglobulin domain (Ig). transmembrane domain (TM) and short cytoplasmic domain. (semaphorin) 4C (Sema4c). transcript variant X1. mRNA	0.24	129.81	0.0018
NM_019680.2	5847	Elf4	E74-like factor 4 (ets domain transcription factor) (Elf4). transcript variant 2. mRNA	3.3	-2.63	0.0018
XM_006513370.4	2667	Prf1	perforin 1 (pore forming protein) (Prf1). transcript variant X1. mRNA	5.33	3.26	0.0018
XM_006514158.3	4335	R3hdm2	R3H domain containing 2 (R3hdm2). transcript variant X6. mRNA	0.09	-134.16	0.0018
NM_152804.2	2802	Plk2	polo like kinase 2 (Plk2). mRNA	0.96	5.51	0.0018
NM_001379040.1	2888	Vmp1	vacuole membrane protein 1 (Vmp1). transcript variant 3. mRNA	0.05	153.67	0.0018
NM_007514.3	7731	Slc7a2	solute carrier family 7 (cationic amino acid transporter. y+ system). member 2 (Slc7a2). transcript variant 1. mRNA	0.02	86.81	0.0018
NM_001199733.1	2698	Daxx	Fas death domain-associated protein (Daxx). transcript variant 1. mRNA	0.92	9.69	0.0018
NM_001365071.1	2807	Ak3	adenylate kinase 3 (Ak3). transcript variant 2. mRNA; nuclear gene for mitochondrial product	0.05	176	0.0018
NM_175476.4	3366	Arhgap25	Rho GTPase activating protein 25 (Arhgap25). transcript variant 2. mRNA	1.16	-10.72	0.0018
XR_004938863.1	4996	Ddx17	DEAD box helicase 17 (Ddx17). transcript variant X2. misc_RNA	0.11	-162.82	0.0018
NM_001310668.1	6501	Zfp142	zinc finger protein 142 (Zfp142). transcript variant 1. mRNA	0.09	-164.43	0.0018
XM_030244988.2	6985	Cflar	CASP8 and FADD-like apoptosis regulator (Cflar). transcript variant X5. mRNA	0.85	18.01	0.0018
NM_001081196.1	5726	Hnrnpul2	heterogeneous nuclear ribonucleoprotein U-like 2 (Hnrnpul2). mRNA	5.45	-2.36	0.0018
XM_036161288.1	2679	Arhgap26	Rho GTPase activating protein 26 (Arhgap26). transcript variant X9. mRNA	0.05	137.63	0.0018
NM_153410.5	3389	Gpsm1	G-protein signalling modulator 1 (AGS3-like. C. elegans) (Gpsm1). transcript variant 1. mRNA	0.14	-149.8	0.0018
XM_030251379.2	5545	Acsl4	acyl-CoA synthetase long-chain family member 4 (Acsl4). transcript variant X1. mRNA	0.23	138.14	0.0019
XR_004934407.1	5304	LOC118567527	uncharacterized LOC118567527 (LOC118567527). transcript variant X1. ncRNA	1.2	-6.66	0.0019
XM_006532984.5	7407	Synrg	synergin. gamma (Synrg). transcript variant X6. mRNA	0.08	-134.61	0.0019
NM_133221.2	2893	Slc8b1	solute carrier family 8 (sodium/lithium/calcium exchanger). member B1 (Slc8b1). transcript variant 1. mRNA; nuclear gene for mitochondrial product	0.9	-9.18	0.0019
XM_036161157.1	2364	Map3k8	mitogen-activated protein kinase kinase kinase 8 (Map3k8). transcript variant X3. mRNA	0.18	143.45	0.0019
XM_006505631.3	8656	Itpr1	inositol 1.4.5-trisphosphate receptor 1 (Itpr1). transcript variant X10. mRNA	0.03	154.72	0.0019
NM_001290818.1	3379	Grk2	G protein-coupled receptor kinase 2 (Grk2). transcript variant 1. mRNA	17.35	-2.58	0.0019
NM_001302649.1	4883	Ifi203	interferon activated gene 203 (Ifi203). transcript variant 1. mRNA	2.95	2.78	0.0019
XR_880303.3	5951	Gm11690	predicted gene 11690 (Gm11690). ncRNA	0.41	-6.63	0.0019
NM_008351.3	1275	Il12a	interleukin 12a (Il12a). transcript variant 2. mRNA	4.01	6.11	0.0019
NM_008230.6	2415	Hdc	histidine decarboxylase (Hdc). mRNA	33.31	4.05	0.0019
NM_001170853.1	1930	Mndal	myeloid nuclear differentiation antigen like (Mndal). transcript variant 1. mRNA	4.83	5.46	0.0019
XM_036159172.1	7724	Ncoa3	nuclear receptor coactivator 3 (Ncoa3). transcript variant X1. mRNA	0.26	137.9	0.0019
NM_001357698.1	3727	Aplp2	amyloid beta (A4) precursor-like protein 2 (Aplp2). transcript variant 4. mRNA	0.03	165.96	0.0019
NM_019450.3	883	Il1f6	interleukin 1 family. member 6 (Il1f6). mRNA	0.13	31.58	0.0019
NR_149750.1	2635	Daxx	Fas death domain-associated protein (Daxx). transcript variant 4. non-coding RNA	3.39	7.02	0.0019
XM_036157124.1	2284	LOC118567893	MLV-related proviral Env polyprotein (LOC118567893). mRNA	28.86	2.46	0.0019
NM_001005247.2	4828	Hps5	HPS5. biogenesis of lysosomal organelles complex 2 subunit 2 (Hps5). transcript variant 1. mRNA	0.11	-154.73	0.0019
XM_030254851.2	4109	Zbtb18	zinc finger and BTB domain containing 18 (Zbtb18). transcript variant X10. mRNA	0.03	154.51	0.002
XM_030250882.2	2266	Cyb561a3	cytochrome b561 family. member A3 (Cyb561a3). transcript variant X7. mRNA	0.42	-26.14	0.002
NM_001286002.1	4160	Scyl3	SCY1-like 3 (S. cerevisiae) (Scyl3). transcript variant 2. mRNA	0.13	43	0.002
XM_030244052.1	6309	Ube4a	ubiquitination factor E4A (Ube4a). transcript variant X10. mRNA	0.12	146.87	0.002
NM_133792.3	2754	Pla2g15	phospholipase A2. group XV (Pla2g15). transcript variant 1. mRNA	0.98	-9.09	0.002
NM_001310676.1	3374	Il6ra	interleukin 6 receptor. alpha (Il6ra). transcript variant 2. mRNA	2.79	-3.12	0.002
XM_011242676.1	1343	Plscr2	phospholipid scramblase 2 (Plscr2). transcript variant X2. mRNA	1.13	13.71	0.002
NM_145141.2	1658	Fcrla	Fc receptor-like A (Fcrla). transcript variant 2. mRNA	3.92	-4.78	0.002
NM_011347.2	3438	Selp	selectin. platelet (Selp). mRNA	2.17	4.82	0.002
NM_001077403.1	6739	Nrp2	neuropilin 2 (Nrp2). transcript variant 1. mRNA	0.02	170.57	0.002
NM_001252394.1	2291	Slc25a19	solute carrier family 25 (mitochondrial thiamine pyrophosphate carrier). member 19 (Slc25a19). transcript variant 3. mRNA; nuclear gene for mitochondrial product	0.13	23.05	0.002
XM_036158834.1	832	Eef1akmt1	EEF1A alpha lysine methyltransferase 1 (Eef1akmt1). transcript variant X2. mRNA	0.12	126.84	0.002
XM_006497951.5	10765	Prrc2b	proline-rich coiled-coil 2B (Prrc2b). transcript variant X5. mRNA	0.01	196.45	0.002
XM_006505287.1	6713	Chd4	chromodomain helicase DNA binding protein 4 (Chd4). transcript variant X4. mRNA	0.18	36.95	0.002
NM_001033350.3	3268	Bank1	B cell scaffold protein with ankyrin repeats 1 (Bank1). transcript variant 1. mRNA	4.14	-3.12	0.002
NM_198095.3	823	Bst2	bone marrow stromal cell antigen 2 (Bst2). mRNA	6.21	4.17	0.002
XM_036152298.1	5324	Dusp16	dual specificity phosphatase 16 (Dusp16). transcript variant X1. mRNA	1.76	3.91	0.002
NM_001361931.1	4545	Msl1	male specific lethal 1 (Msl1). transcript variant 2. mRNA	0.03	167.33	0.002
NM_013457.4	4007	Add1	adducin 1 (alpha) (Add1). transcript variant 2. mRNA	0.04	171.29	0.002
NM_001272056.1	3432	Numb	NUMB endocytic adaptor protein (Numb). transcript variant 4. mRNA	0.05	151.64	0.002
NR_168683.1	2337	Gm26885	predicted gene. 26885 (Gm26885). transcript variant 1. long non-coding RNA	0.58	14.71	0.0021
NM_009082.3	856	Rpl29	ribosomal protein L29 (Rpl29). transcript variant 2. mRNA	0.17	164.81	0.0021
NM_001374619.1	3189	Safb	scaffold attachment factor B (Safb). transcript variant 1. mRNA	0.21	-65.83	0.0021
NM_001372536.1	4864	Ets1	E26 avian leukemia oncogene 1. 5' domain (Ets1). transcript variant 5. mRNA	5.02	8.8	0.0021
XM_006523856.5	4504	Pknox1	Pbx/knotted 1 homeobox (Pknox1). transcript variant X2. mRNA	0.08	-125.82	0.0021
XM_006512623.5	10878	Rev3l	REV3 like. DNA directed polymerase zeta catalytic subunit (Rev3l). transcript variant X2. mRNA	0.06	-160.75	0.0021
XM_006531508.1	4143	Crispld2	cysteine-rich secretory protein LCCL domain containing 2 (Crispld2). transcript variant X1. mRNA	0.04	152.03	0.0021
NM_001164168.1	4984	Pias2	protein inhibitor of activated STAT 2 (Pias2). transcript variant 3. mRNA	0.08	-133.54	0.0021
NM_175534.3	3777	Mrgpre	MAS-related GPR. member E (Mrgpre). mRNA	0.29	-15.5	0.0021
XR_001782031.3	5514	Cd2ap	CD2-associated protein (Cd2ap). transcript variant X3. misc_RNA	0.05	162.52	0.0021
XM_030246956.2	1547	Atp6v1d	ATPase. H+ transporting. lysosomal V1 subunit D (Atp6v1d). transcript variant X1. mRNA	0.07	127.86	0.0021
NM_001360906.1	2015	Nfkbid	nuclear factor of kappa light polypeptide gene enhancer in B cells inhibitor. delta (Nfkbid). transcript variant 1. mRNA	6.4	3.98	0.0021
NM_001081239.2	2109	Lilra5	leukocyte immunoglobulin-like receptor. subfamily A (with TM domain). member 5 (Lilra5). mRNA	0.63	-8.42	0.0021
XM_036163426.1	8118	Pag1	phosphoprotein associated with glycosphingolipid microdomains 1 (Pag1). transcript variant X4. mRNA	0.02	152.38	0.0022
NM_008551.2	2884	Mapkapk2	MAP kinase-activated protein kinase 2 (Mapkapk2). mRNA	14.61	2.45	0.0022
XM_006539226.3	7997	Hnrnpr	heterogeneous nuclear ribonucleoprotein R (Hnrnpr). transcript variant X8. mRNA	0.23	128.48	0.0022
NM_001163687.1	2418	Naaa	N-acylethanolamine acid amidase (Naaa). transcript variant 2. mRNA	0.05	166.21	0.0022
NM_001111079.1	3559	Uhrf1	ubiquitin-like. containing PHD and RING finger domains. 1 (Uhrf1). transcript variant 3. mRNA	0.43	125.76	0.0022
XM_006528006.3	4728	Stard8	START domain containing 8 (Stard8). transcript variant X9. mRNA	0.02	105.62	0.0022
NM_001310541.1	2670	Tacc3	transforming. acidic coiled-coil containing protein 3 (Tacc3). transcript variant 1. mRNA	0.57	125.24	0.0022
XM_006524890.5	4045	Ppp4r1	protein phosphatase 4. regulatory subunit 1 (Ppp4r1). transcript variant X5. mRNA	0.05	141.89	0.0022
XM_030244037.1	2188	Csk	c-src tyrosine kinase (Csk). transcript variant X3. mRNA	9.21	-2.3	0.0022
NM_011710.3	1842	Wars	tryptophanyl-tRNA synthetase (Wars). transcript variant 1. mRNA	0.16	120.69	0.0022
NM_001110330.1	2545	Fiz1	Flt3 interacting zinc finger protein 1 (Fiz1). transcript variant 4. mRNA	0.05	126.47	0.0022
XM_011250697.4	8288	Cic	capicua transcriptional repressor (Cic). transcript variant X3. mRNA	0.02	185	0.0022
XM_017317111.3	5222	Senp7	SUMO1/sentrin specific peptidase 7 (Senp7). transcript variant X3. mRNA	0.11	-147.79	0.0022
NM_027882.4	6128	Cic	capicua transcriptional repressor (Cic). transcript variant 1. mRNA	0.02	183.67	0.0022
XR_004938826.1	5109	Brd1	bromodomain containing 1 (Brd1). transcript variant X7. misc_RNA	0.15	124.5	0.0022
NM_009793.3	12331	Camk4	calcium/calmodulin-dependent protein kinase IV (Camk4). mRNA	0.02	183.33	0.0023
XM_030250034.1	8946	Tulp4	tubby like protein 4 (Tulp4). transcript variant X14. mRNA	0.33	20.91	0.0023
XM_030250418.2	4958	Wac	WW domain containing adaptor with coiled-coil (Wac). transcript variant X8. mRNA	0.04	142.08	0.0023
NM_026862.3	2733	Cd177	CD177 antigen (Cd177). mRNA	3.51	4.77	0.0023
XM_030243282.2	4064	Ctcf	CCCTC-binding factor (Ctcf). transcript variant X2. mRNA	0.07	54.56	0.0023
XM_006507284.5	1675	Coro1a	coronin. actin binding protein 1A (Coro1a). transcript variant X1. mRNA	5.98	-3.6	0.0023
XM_030244066.2	1274	Il18	interleukin 18 (Il18). transcript variant X5. mRNA	0.13	100.23	0.0023
XM_017318387.3	9606	Hcfc1	host cell factor C1 (Hcfc1). transcript variant X3. mRNA	0.02	143.88	0.0023
XM_006497225.4	5840	Cr2	complement receptor 2 (Cr2). transcript variant X4. mRNA	0.72	-9.35	0.0023
NM_001142701.1	3928	Arhgap45	Rho GTPase activating protein 45 (Arhgap45). transcript variant 1. mRNA	8.53	-2.82	0.0023
NM_001291928.1	4588	Adora1	adenosine A1 receptor (Adora1). transcript variant 4. mRNA	0.26	32.56	0.0023
XM_036160429.1	10724	Zfp871	zinc finger protein 871 (Zfp871). transcript variant X1. mRNA	1	26.86	0.0023
XM_036156826.1	4174	Mpp2	membrane protein. palmitoylated 2 (MAGUK p55 subfamily member 2) (Mpp2). transcript variant X7. mRNA	0.04	160.9	0.0023
XM_006539444.2	3239	Prkd2	protein kinase D2 (Prkd2). transcript variant X2. mRNA	1.07	-9.61	0.0023
XM_006534071.3	1835	Pcyt2	phosphate cytidylyltransferase 2. ethanolamine (Pcyt2). transcript variant X2. mRNA	0.07	139.35	0.0023
XM_036159357.1	3589	Nmt2	N-myristoyltransferase 2 (Nmt2). transcript variant X2. mRNA	0.09	120.07	0.0023
NM_001025779.2	4620	Cdc6	cell division cycle 6 (Cdc6). transcript variant 2. mRNA	0.13	22.17	0.0023
NM_001289580.1	3347	Chfr	checkpoint with forkhead and ring finger domains (Chfr). transcript variant 5. mRNA	0.28	118.91	0.0023
XM_011248794.3	3504	Pld2	phospholipase D2 (Pld2). transcript variant X1. mRNA	0.1	-121.39	0.0023
XM_030247230.2	6470	Ttc37	tetratricopeptide repeat domain 37 (Ttc37). transcript variant X6. mRNA	0.06	139.21	0.0023
XM_017313119.3	3343	Ccr3	chemokine (C-C motif) receptor 3 (Ccr3). transcript variant X1. mRNA	0.46	-15.9	0.0023
NM_028054.3	1941	Zfyve19	zinc finger. FYVE domain containing 19 (Zfyve19). transcript variant 1. mRNA	0.21	-126.64	0.0023
XM_011239033.4	3383	Nr4a2	nuclear receptor subfamily 4. group A. member 2 (Nr4a2). transcript variant X2. mRNA	0.43	122.65	0.0023
NM_001359282.1	2496	Adpgk	ADP-dependent glucokinase (Adpgk). transcript variant 2. mRNA	10.47	3.8	0.0023
NM_177411.4	3180	Rab5b	RAB5B. member RAS oncogene family (Rab5b). mRNA	4.68	-2.64	0.0023
XM_006537949.2	6738	Casp8ap2	caspase 8 associated protein 2 (Casp8ap2). transcript variant X1. mRNA	0.03	183.2	0.0023
NM_172628.2	4562	Sh3tc2	SH3 domain and tetratricopeptide repeats 2 (Sh3tc2). mRNA	0.03	103.33	0.0024
XR_868717.2	2215	Gm15411	predicted gene 15411 (Gm15411). transcript variant X2. ncRNA	0.55	117.52	0.0024
XM_017321911.3	3321	E430018J23Rik	RIKEN cDNA E430018J23 gene (E430018J23Rik). transcript variant X4. mRNA	0.03	106.14	0.0024
XM_030250791.1	3101	Rasgrp2	RAS. guanyl releasing protein 2 (Rasgrp2). transcript variant X19. mRNA	0.04	158.53	0.0024
XM_011245118.4	10440	Wdfy4	WD repeat and FYVE domain containing 4 (Wdfy4). transcript variant X1. mRNA	0.05	-151.29	0.0024
XM_006499918.5	4845	Calcrl	calcitonin receptor-like (Calcrl). transcript variant X2. mRNA	0.25	-16.01	0.0024
NM_177354.4	6189	Vash1	vasohibin 1 (Vash1). mRNA	0.08	16.07	0.0024
XM_006532434.1	4561	Nbr1	NBR1. autophagy cargo receptor (Nbr1). transcript variant X6. mRNA	0.04	127.53	0.0024
NM_011876.3	1594	Twf2	twinfilin actin binding protein 2 (Twf2). mRNA	7.38	-2.67	0.0024
XM_030245851.2	2945	Ggnbp2	gametogenetin binding protein 2 (Ggnbp2). transcript variant X10. mRNA	0.04	161.15	0.0024
NM_001355288.1	9291	Zeb2	zinc finger E-box binding homeobox 2 (Zeb2). transcript variant 4. mRNA	0.09	-25.01	0.0024
XM_006530846.4	3729	Usp10	ubiquitin specific peptidase 10 (Usp10). transcript variant X2. mRNA	0.03	155.44	0.0024
NM_001359262.1	3395	Ivns1abp	influenza virus NS1A binding protein (Ivns1abp). transcript variant 4. mRNA	0.04	157.71	0.0024
NM_001361960.1	2638	Vps37c	vacuolar protein sorting 37C (Vps37c). transcript variant 4. mRNA	0.05	157.38	0.0024
NM_007575.4	5330	Ciita	class II transactivator (Ciita). transcript variant 2. mRNA	1.63	-6.77	0.0024
XM_030245657.2	4784	Per1	period circadian clock 1 (Per1). transcript variant X3. mRNA	1.2	20.94	0.0024
XM_036160849.1	5099	Eml4	echinoderm microtubule associated protein like 4 (Eml4). transcript variant X5. mRNA	0.04	155	0.0024
XM_036156352.1	6778	Kif1c	kinesin family member 1C (Kif1c). transcript variant X2. mRNA	0.07	-170.94	0.0024
XM_006503348.5	2329	Spata6	spermatogenesis associated 6 (Spata6). transcript variant X5. mRNA	0.06	45.02	0.0024
XR_001780777.3	6483	Ttc37	tetratricopeptide repeat domain 37 (Ttc37). transcript variant X12. misc_RNA	0.02	158.92	0.0024
XM_006496137.4	3209	Slc40a1	solute carrier family 40 (iron-regulated transporter). member 1 (Slc40a1). transcript variant X2. mRNA	0.03	122.24	0.0024
NM_001199284.1	6952	Slc43a2	solute carrier family 43. member 2 (Slc43a2). transcript variant 2. mRNA	0.79	-20.07	0.0024
XM_006523065.2	3007	Tmprss2	transmembrane protease. serine 2 (Tmprss2). transcript variant X2. mRNA	0.03	38.91	0.0025
NM_001286508.1	4549	Azi2	5-azacytidine induced gene 2 (Azi2). transcript variant 4. mRNA	0.03	153.19	0.0025
XR_001782679.3	2216	Gm36043	predicted gene. 36043 (Gm36043). transcript variant X3. ncRNA	1.18	8.18	0.0025
XM_030251509.2	4374	Arhgef6	Rac/Cdc42 guanine nucleotide exchange factor (GEF) 6 (Arhgef6). transcript variant X5. mRNA	0.15	-158.06	0.0025
NR_028425.1	2232	D7Ertd143e	DNA segment. Chr 7. ERATO Doi 143. expressed (D7Ertd143e). long non-coding RNA	0.35	-11.4	0.0025
XM_006527412.1	2452	Rab3il1	RAB3A interacting protein (rabin3)-like 1 (Rab3il1). transcript variant X2. mRNA	0.1	106.23	0.0025
NM_018851.4	3756	Samhd1	SAM domain and HD domain. 1 (Samhd1). transcript variant 1. mRNA	11.37	2.43	0.0025
XM_011247418.2	1699	Gm41844	predicted gene. 41844 (Gm41844). mRNA	7.56	3.06	0.0025
XM_006519289.5	7655	Sfmbt1	Scm-like with four mbt domains 1 (Sfmbt1). transcript variant X4. mRNA	0.06	-130.56	0.0025
XM_036164638.1	3113	LOC118568705	MLV-related proviral Env polyprotein-like (LOC118568705). transcript variant X2. mRNA	9.46	2.7	0.0025
NM_001164289.1	1590	Phf11c	PHD finger protein 11C (Phf11c). mRNA	1.47	5.71	0.0025
XM_006509262.4	3792	Acsl1	acyl-CoA synthetase long-chain family member 1 (Acsl1). transcript variant X1. mRNA	0.06	173.53	0.0025
XM_006529268.5	3817	Rgl1	ral guanine nucleotide dissociation stimulator.-like 1 (Rgl1). transcript variant X4. mRNA	0.03	176.34	0.0025
XR_001783036.3	1656	Gm13073	predicted gene 13073 (Gm13073). transcript variant X1. ncRNA	0.18	-21.77	0.0025
XM_036160990.1	5102	Nr3c1	nuclear receptor subfamily 3. group C. member 1 (Nr3c1). transcript variant X11. mRNA	0.03	152.52	0.0025
XM_030249598.2	5437	Qk	quaking (Qk). transcript variant X6. mRNA	0.02	154.39	0.0025
NM_001309637.2	2150	Clec7a	C-type lectin domain family 7. member a (Clec7a). transcript variant 2. mRNA	1.94	-4.64	0.0025
NM_026129.2	1258	Erp29	endoplasmic reticulum protein 29 (Erp29). mRNA	9.76	-2.52	0.0025
XR_003947209.2	4598	Niban3	niban apoptosis regulator 3 (Niban3). transcript variant X10. misc_RNA	0.24	49.09	0.0025
NM_009104.2	2199	Rrm2	ribonucleotide reductase M2 (Rrm2). mRNA	1.24	4.84	0.0025
XM_006507547.5	1274	Trim30d	tripartite motif-containing 30D (Trim30d). transcript variant X1. mRNA	0.25	31.65	0.0025
XM_036155315.1	3044	Ccpg1	cell cycle progression 1 (Ccpg1). transcript variant X2. mRNA	0.13	-122.6	0.0026
NM_001355264.1	2979	Bcar3	breast cancer anti-estrogen resistance 3 (Bcar3). transcript variant 2. mRNA	0.04	121.88	0.0026
XM_036163429.1	3470	Rbbp5	retinoblastoma binding protein 5. histone lysine methyltransferase complex subunit (Rbbp5). transcript variant X5. mRNA	0.03	131.93	0.0026
XR_003946511.2	2978	Gramd1a	GRAM domain containing 1A (Gramd1a). transcript variant X5. misc_RNA	0.04	138.41	0.0026
XM_017321538.1	4491	Frmd4b	FERM domain containing 4B (Frmd4b). transcript variant X3. mRNA	0.39	21.56	0.0026
NM_007643.4	3542	Cd36	CD36 molecule (Cd36). transcript variant 2. mRNA	0.55	-11.27	0.0026
XR_004934041.1	1976	Pira2	paired-Ig-like receptor A2 (Pira2). transcript variant X7. misc_RNA	0.56	123.24	0.0026
XM_006532435.1	4503	Nbr1	NBR1. autophagy cargo receptor (Nbr1). transcript variant X8. mRNA	0.03	150.54	0.0026
XM_036153240.1	3626	Lair1	leukocyte-associated Ig-like receptor 1 (Lair1). transcript variant X4. mRNA	0.1	-62.77	0.0026
NM_001289526.1	4397	Tcerg1	transcription elongation regulator 1 (CA150) (Tcerg1). transcript variant 2. mRNA	0.06	58.33	0.0026
NM_029581.4	4979	Mtif3	mitochondrial translational initiation factor 3 (Mtif3). transcript variant 3. mRNA; nuclear gene for mitochondrial product	0.05	-116.13	0.0026
XM_036159077.1	3577	Angpt1	angiopoietin 1 (Angpt1). transcript variant X2. mRNA	0.03	61.93	0.0026
XM_006527246.5	1623	Rcl1	RNA terminal phosphate cyclase-like 1 (Rcl1). transcript variant X3. mRNA	0.35	39.31	0.0026
XM_017320258.2	7493	Mysm1	myb-like. SWIRM and MPN domains 1 (Mysm1). transcript variant X1. mRNA	0.28	35.94	0.0026
XR_004940658.1	8729	Lrrfip1	leucine rich repeat (in FLII) interacting protein 1 (Lrrfip1). transcript variant X2. misc_RNA	0.21	125.7	0.0026
XM_030249556.1	3485	Uhrf1	ubiquitin-like. containing PHD and RING finger domains. 1 (Uhrf1). transcript variant X2. mRNA	0.1	142.9	0.0026
XM_036164637.1	2119	LOC118568705	MLV-related proviral Env polyprotein-like (LOC118568705). transcript variant X1. mRNA	10.13	2.82	0.0026
XM_006535074.4	3051	Hnrnpdl	heterogeneous nuclear ribonucleoprotein D-like (Hnrnpdl). transcript variant X1. mRNA	0.04	150.75	0.0026
XR_003946385.2	12721	Dyrk1b	dual-specificity tyrosine-(Y)-phosphorylation regulated kinase 1b (Dyrk1b). transcript variant X7. misc_RNA	0.04	-67.87	0.0026
NM_001360709.1	5012	Aen	apoptosis enhancing nuclease (Aen). transcript variant 3. mRNA	0.07	139.7	0.0027
XM_017320186.1	1466	Smyd2	SET and MYND domain containing 2 (Smyd2). transcript variant X3. mRNA	0.08	41.15	0.0027
XM_006501719.3	3035	Gbp3	guanylate binding protein 3 (Gbp3). transcript variant X1. mRNA	0.1	109.01	0.0027
XM_036165238.1	5497	Cep135	centrosomal protein 135 (Cep135). transcript variant X6. mRNA	0.04	116.29	0.0027
XM_030254883.1	9540	Med13l	mediator complex subunit 13-like (Med13l). transcript variant X3. mRNA	0.01	130.05	0.0027
XM_017322335.1	8817	Gvin3	GTPase. very large interferon inducible. family member 3 (Gvin3). transcript variant X6. mRNA	0.03	146.07	0.0027
NM_013495.2	4331	Cpt1a	carnitine palmitoyltransferase 1a. liver (Cpt1a). mRNA	4.37	-4.36	0.0027
NR_153378.1	5440	Gbp9	guanylate-binding protein 9 (Gbp9). transcript variant 2. non-coding RNA	1.74	5.45	0.0027
XM_006540053.4	2517	C5ar2	complement component 5a receptor 2 (C5ar2). transcript variant X6. mRNA	0.2	-30.26	0.0027
XR_003954917.2	5155	Kdm4a	lysine (K)-specific demethylase 4A (Kdm4a). transcript variant X2. misc_RNA	0.26	27.51	0.0027
NM_001001184.2	3835	Primpol	primase and polymerase (DNA-directed) (Primpol). transcript variant 1. mRNA	0.11	-119.27	0.0027
XM_006495838.5	7721	Phf3	PHD finger protein 3 (Phf3). transcript variant X5. mRNA	0.21	-16.35	0.0027
XM_036165628.1	3873	Acox3	acyl-Coenzyme A oxidase 3. pristanoyl (Acox3). transcript variant X10. mRNA	0.03	130.79	0.0027
XR_386008.4	2734	Srfbp1	serum response factor binding protein 1 (Srfbp1). transcript variant X1. misc_RNA	0.08	114.92	0.0027
XR_001784152.3	1648	Miip	migration and invasion inhibitory protein (Miip). transcript variant X6. misc_RNA	0.19	-115.67	0.0028
NM_016687.3	1780	Sfrp4	secreted frizzled-related protein 4 (Sfrp4). mRNA	0.05	95.41	0.0028
XM_030250497.2	1766	Bin1	bridging integrator 1 (Bin1). transcript variant X23. mRNA	2.66	-3.8	0.0028
XM_036162925.1	4326	Pde7a	phosphodiesterase 7A (Pde7a). transcript variant X5. mRNA	0.11	-109.49	0.0028
NM_025823.4	4291	Pcyox1	prenylcysteine oxidase 1 (Pcyox1). transcript variant 1. mRNA	0.74	-6.15	0.0028
XM_006505776.4	11681	Tet3	tet methylcytosine dioxygenase 3 (Tet3). transcript variant X2. mRNA	0.05	54.9	0.0028
NM_173762.4	7813	Cenpe	centromere protein E (Cenpe). mRNA	0.43	4.04	0.0028
XM_006523860.4	2325	Ppm1b	protein phosphatase 1B. magnesium dependent. beta isoform (Ppm1b). transcript variant X1. mRNA	0.14	139.35	0.0028
XM_030250035.1	8817	Tulp4	tubby like protein 4 (Tulp4). transcript variant X15. mRNA	0.86	14.39	0.0028
NM_001276493.1	5539	Dag1	dystroglycan 1 (Dag1). transcript variant 7. mRNA	0.09	-139.81	0.0028
NM_001161623.2	2099	Cdc45	cell division cycle 45 (Cdc45). transcript variant 2. mRNA	0.07	24.53	0.0028
NM_011905.3	2874	Tlr2	toll-like receptor 2 (Tlr2). mRNA	5.92	3.34	0.0028
NM_001110832.1	3728	Nfya	nuclear transcription factor-Y alpha (Nfya). transcript variant 1. mRNA	0.11	-141.96	0.0028
NM_001177349.2	2678	Ifi213	interferon activated gene 213 (Ifi213). transcript variant 1. mRNA	0.09	125.24	0.0028
NM_001372489.1	1865	Sphk1	sphingosine kinase 1 (Sphk1). transcript variant 11. mRNA	0.06	134.36	0.0028
XM_030255017.2	8038	AB010352	cDNA sequence AB010352 (AB010352). transcript variant X2. mRNA	0.06	-20.79	0.0028
XM_006535447.4	16178	4932438A13Rik	RIKEN cDNA 4932438A13 gene (4932438A13Rik). transcript variant X2. mRNA	0.01	146.98	0.0028
NM_001360519.1	2188	Cd180	CD180 antigen (Cd180). transcript variant 2. mRNA	1.58	-9.01	0.0028
XM_011247578.4	6883	Zfx	zinc finger protein X-linked (Zfx). transcript variant X2. mRNA	0.04	61.98	0.0028
NM_028608.3	1081	Glipr1	GLI pathogenesis-related 1 (glioma) (Glipr1). mRNA	6.49	-3.67	0.0028
XM_006529057.5	5149	Mgat5	mannoside acetylglucosaminyltransferase 5 (Mgat5). transcript variant X4. mRNA	0.02	99.19	0.0029
XR_004942190.1	2859	Gm32908	predicted gene. 32908 (Gm32908). transcript variant X3. ncRNA	0.36	-10.66	0.0029
XR_383424.2	347	Gm36641	predicted gene. 36641 (Gm36641). transcript variant X1. ncRNA	0.28	95.32	0.0029
XM_036156588.1	3297	Kat7	K(lysine) acetyltransferase 7 (Kat7). transcript variant X10. mRNA	0.07	143.05	0.0029
NM_001360579.1	1508	Zfand6	zinc finger. AN1-type domain 6 (Zfand6). transcript variant 3. mRNA	0.07	127.38	0.0029
NM_001308167.1	3015	Sh3bp5l	SH3 binding domain protein 5 like (Sh3bp5l). transcript variant 4. mRNA	0.03	142.91	0.0029
XM_011248764.3	2018	Irgm1	immunity-related GTPase family M member 1 (Irgm1). transcript variant X2. mRNA	1.17	10.31	0.0029
XM_017315154.1	918	Serpina3i	serine (or cysteine) peptidase inhibitor. clade A. member 3I (Serpina3i). transcript variant X4. mRNA	0.18	109.88	0.0029
NM_011521.2	2460	Sdc4	syndecan 4 (Sdc4). mRNA	3.52	3.34	0.0029
XM_006519566.4	4323	Rcbtb1	regulator of chromosome condensation (RCC1) and BTB (POZ) domain containing protein 1 (Rcbtb1). transcript variant X1. mRNA	0.61	38.44	0.0029
XM_006534691.3	4135	Gbp6	guanylate binding protein 6 (Gbp6). transcript variant X6. mRNA	0.17	33.98	0.0029
XM_036163679.1	5533	Smc2	structural maintenance of chromosomes 2 (Smc2). transcript variant X1. mRNA	0.04	162.51	0.0029
NM_001043317.2	4097	Cd22	CD22 antigen (Cd22). transcript variant 1. mRNA	1.29	-8.49	0.003
NM_007532.5	7868	Bcat1	branched chain aminotransferase 1. cytosolic (Bcat1). transcript variant 2. mRNA	0.04	24.69	0.003
NM_001286437.1	3560	Scfd2	Sec1 family domain containing 2 (Scfd2). transcript variant c. mRNA	0.03	113.04	0.003
XM_036161227.1	3046	Iigp1	interferon inducible GTPase 1 (Iigp1). transcript variant X1. mRNA	0.39	22.79	0.003
XM_011238921.2	3928	Rps6kc1	ribosomal protein S6 kinase polypeptide 1 (Rps6kc1). transcript variant X7. mRNA	0.03	140.98	0.003
XM_011246258.2	2856	C3	complement component 3 (C3). transcript variant X1. mRNA	2.4	5.98	0.003
NM_001289598.1	2647	Txndc5	thioredoxin domain containing 5 (Txndc5). transcript variant 2. mRNA	0.19	-151.37	0.003
XR_004942497.1	4149	Guf1	GUF1 homolog. GTPase (Guf1). transcript variant X2. misc_RNA	0.04	96.88	0.003
NR_169037.1	2146	Gm44851	predicted gene 44851 (Gm44851). long non-coding RNA	0.21	16.54	0.003
XM_006519714.1	3561	Fbxo34	F-box protein 34 (Fbxo34). transcript variant X7. mRNA	0.05	140.42	0.0031
XM_006534297.5	2140	Strada	STE20-related kinase adaptor alpha (Strada). transcript variant X7. mRNA	0.37	-14.3	0.0031
XM_036154276.1	2252	Cdc16	CDC16 cell division cycle 16 (Cdc16). transcript variant X4. mRNA	0.38	118.82	0.0031
XM_006508681.4	5255	Arhgef18	rho/rac guanine nucleotide exchange factor (GEF) 18 (Arhgef18). transcript variant X6. mRNA	0.02	112.08	0.0031
XM_036160231.1	2320	Tank	TRAF family member-associated Nf-kappa B activator (Tank). transcript variant X3. mRNA	0.16	32.65	0.0031
NM_146061.4	1835	Prr5	proline rich 5 (renal) (Prr5). transcript variant 1. mRNA	1.44	-5.23	0.0031
NM_001379075.1	3797	Actn1	actinin. alpha 1 (Actn1). transcript variant 3. mRNA	0.45	118.52	0.0031
XM_030254451.2	11194	Tnrc18	trinucleotide repeat containing 18 (Tnrc18). transcript variant X7. mRNA	0.06	-39.81	0.0031
XR_003949991.2	3445	Mark3	MAP/microtubule affinity regulating kinase 3 (Mark3). transcript variant X18. misc_RNA	0.07	48.4	0.0031
XM_030242333.2	2836	Inpp5a	inositol polyphosphate-5-phosphatase A (Inpp5a). transcript variant X2. mRNA	0.16	33.75	0.0031
XM_036154356.1	2087	Rab11fip1	RAB11 family interacting protein 1 (class I) (Rab11fip1). transcript variant X3. mRNA	0.27	42.83	0.0031
NM_001291019.1	4043	Sirpa	signal-regulatory protein alpha (Sirpa). transcript variant 4. mRNA	0.03	137.95	0.0031
XM_017316084.3	7340	Kat6b	K(lysine) acetyltransferase 6B (Kat6b). transcript variant X12. mRNA	0.02	158.3	0.0031
XM_006539204.5	4749	Arhgef10l	Rho guanine nucleotide exchange factor (GEF) 10-like (Arhgef10l). transcript variant X10. mRNA	0.08	-122.89	0.0031
XR_004934799.1	6346	Wrn	Werner syndrome RecQ like helicase (Wrn). transcript variant X5. misc_RNA	0.27	118.13	0.0031
XM_036165901.1	31714	Mest	mesoderm specific transcript (Mest). transcript variant X3. mRNA	0.02	-65.64	0.0031
XR_003946573.2	10890	Fam160a2	family with sequence similarity 160. member A2 (Fam160a2). transcript variant X8. misc_RNA	0.03	-126.99	0.0031
NM_023858.4	5434	Mtmr2	myotubularin related protein 2 (Mtmr2). transcript variant 1. mRNA	0.09	-127.26	0.0031
NM_011990.2	9227	Slc7a11	solute carrier family 7 (cationic amino acid transporter. y+ system). member 11 (Slc7a11). mRNA	0.94	11.84	0.0031
XM_006517029.2	2355	Brd9	bromodomain containing 9 (Brd9). transcript variant X4. mRNA	0.04	113.49	0.0031
XM_030245649.2	4599	Ogdh	oxoglutarate (alpha-ketoglutarate) dehydrogenase (lipoamide) (Ogdh). transcript variant X6. mRNA	0.04	137.65	0.0032
XR_004933630.1	6898	Etnk1	ethanolamine kinase 1 (Etnk1). transcript variant X3. misc_RNA	0.02	105.1	0.0032
XM_036156218.1	9140	Acaca	acetyl-Coenzyme A carboxylase alpha (Acaca). transcript variant X13. mRNA	0.06	-163.35	0.0032
NM_029531.2	3863	Zfp60	zinc finger protein 60 (Zfp60). transcript variant 2. mRNA	0.46	-5.99	0.0032
XR_384007.4	5142	Brd1	bromodomain containing 1 (Brd1). transcript variant X6. misc_RNA	0.17	-22.09	0.0032
NM_197959.2	3345	Kif18b	kinesin family member 18B (Kif18b). mRNA	0.35	5.89	0.0032
NM_173744.4	2477	Tdrp	testis development related protein (Tdrp). transcript variant 2. mRNA	0.2	-87.97	0.0032
XM_036161648.1	989	Dnajc4	DnaJ heat shock protein family (Hsp40) member C4 (Dnajc4). transcript variant X1. mRNA	0.12	84.22	0.0032
XR_383935.5	1001	Gm34150	predicted gene. 34150 (Gm34150). transcript variant X2. ncRNA	0.16	42.42	0.0032
NM_018729.2	3758	Cd244a	CD244 molecule A (Cd244a). mRNA	1.74	-4.06	0.0032
XM_006510861.3	3416	Pml	promyelocytic leukemia (Pml). transcript variant X2. mRNA	0.83	8.49	0.0032
NM_013792.2	2504	Naglu	alpha-N-acetylglucosaminidase (Sanfilippo disease IIIB) (Naglu). mRNA	0.64	-10.47	0.0032
NM_001033767.3	2648	Gm4951	predicted gene 4951 (Gm4951). mRNA	0.13	17.17	0.0032
NM_205819.3	3212	Tlr11	toll-like receptor 11 (Tlr11). mRNA	0.08	-107.44	0.0032
NM_178372.2	1216	Prss34	protease. serine 34 (Prss34). mRNA	0.54	13.24	0.0032
NM_025566.3	2365	Tnfaip8l1	tumor necrosis factor. alpha-induced protein 8-like 1 (Tnfaip8l1). mRNA	0.17	-16.74	0.0032
XM_030250078.2	3004	Zfp942	zinc finger protein 942 (Zfp942). transcript variant X9. mRNA	0.12	108.65	0.0032
XM_036164951.1	4592	Dhx37	DEAH (Asp-Glu-Ala-His) box polypeptide 37 (Dhx37). transcript variant X4. mRNA	0.34	19.91	0.0032
NM_183208.4	7534	Zmiz1	zinc finger. MIZ-type containing 1 (Zmiz1). transcript variant 1. mRNA	0.7	-10.17	0.0032
NM_021424.3	5701	Nectin1	nectin cell adhesion molecule 1 (Nectin1). transcript variant 1. mRNA	0.15	-8.43	0.0032
XM_006523286.5	3227	Ccr6	chemokine (C-C motif) receptor 6 (Ccr6). transcript variant X2. mRNA	0.33	-12.81	0.0032
XM_036154703.1	1962	Prkcsh	protein kinase C substrate 80K-H (Prkcsh). transcript variant X3. mRNA	0.06	136.48	0.0032
NM_001302140.1	7133	Myof	myoferlin (Myof). transcript variant 1. mRNA	0.15	-23.51	0.0032
XM_006540743.5	5291	Zfp710	zinc finger protein 710 (Zfp710). transcript variant X2. mRNA	0.15	-15.61	0.0032
XM_006531377.4	2159	Osgin1	oxidative stress induced growth inhibitor 1 (Osgin1). transcript variant X1. mRNA	0.33	-18.02	0.0032
XM_011243077.2	7601	Plekhg1	pleckstrin homology domain containing. family G (with RhoGef domain) member 1 (Plekhg1). transcript variant X3. mRNA	0.03	155.9	0.0032
NM_130904.2	880	Cd209d	CD209d antigen (Cd209d). mRNA	0.33	-21.18	0.0032
XM_030242209.2	4668	Furin	furin (paired basic amino acid cleaving enzyme) (Furin). transcript variant X7. mRNA	0.03	119.44	0.0032
XM_030250257.2	5795	Madd	MAP-kinase activating death domain (Madd). transcript variant X48. mRNA	0.01	98.88	0.0032
XM_036157128.1	3094	Gm46290	predicted gene. 46290 (Gm46290). transcript variant X1. mRNA	17.19	2.85	0.0032
XR_001782384.3	4389	Tcerg1	transcription elongation regulator 1 (CA150) (Tcerg1). transcript variant X9. misc_RNA	0.2	115.83	0.0032
NM_001172472.2	1868	Sphk1	sphingosine kinase 1 (Sphk1). transcript variant 4. mRNA	0.1	107.58	0.0032
XM_036152741.1	769	Mgmt	O-6-methylguanine-DNA methyltransferase (Mgmt). transcript variant X6. mRNA	0.13	107.17	0.0032
XM_006529845.4	2988	Steap3	STEAP family member 3 (Steap3). transcript variant X1. mRNA	0.04	119.3	0.0032
XM_036164065.1	6326	Ahdc1	AT hook. DNA binding motif. containing 1 (Ahdc1). transcript variant X11. mRNA	0.09	-143.52	0.0033
NR_103550.1	1253	5430425K12Rik	RIKEN cDNA 5430425K12 gene (5430425K12Rik). long non-coding RNA	0.55	-12.64	0.0033
NM_001311094.2	3131	Rassf5	Ras association (RalGDS/AF-6) domain family member 5 (Rassf5). transcript variant 2. mRNA	9.51	-2.4	0.0033
XM_006540644.4	10965	Igf1r	insulin-like growth factor I receptor (Igf1r). transcript variant X4. mRNA	0.11	-39.91	0.0033
XR_003952766.2	2493	Sgms1	sphingomyelin synthase 1 (Sgms1). transcript variant X17. misc_RNA	0.27	99.21	0.0033
NR_153832.1	2756	Pgghg	protein glucosylgalactosylhydroxylysine glucosidase (Pgghg). transcript variant 2. non-coding RNA	0.04	117.82	0.0033
XM_011239142.4	7794	Tsc1	TSC complex subunit 1 (Tsc1). transcript variant X4. mRNA	0.03	133.69	0.0033
NM_001253706.1	4737	Septin6	septin 6 (Septin6). transcript variant 4. mRNA	2.98	-2.66	0.0033
XM_006501983.2	927	Dpm3	dolichyl-phosphate mannosyltransferase polypeptide 3 (Dpm3). transcript variant X1. mRNA	0.3	-30.62	0.0033
XM_006503125.4	5284	Clspn	claspin (Clspn). transcript variant X5. mRNA	0.11	111.45	0.0033
XM_036160437.1	6614	Bicral	BRD4 interacting chromatin remodeling complex associated protein like (Bicral). transcript variant X7. mRNA	0.05	-120.93	0.0033
XR_003954297.2	2912	Stat1	signal transducer and activator of transcription 1 (Stat1). transcript variant X5. misc_RNA	2.04	6.4	0.0033
NM_025459.3	2929	Retreg1	reticulophagy regulator 1 (Retreg1). transcript variant 2. mRNA	0.06	135.99	0.0034
NM_001355189.1	3681	Tdrd7	tudor domain containing 7 (Tdrd7). transcript variant 3. mRNA	0.1	127.19	0.0034
NM_001242606.1	2415	Acin1	apoptotic chromatin condensation inducer 1 (Acin1). transcript variant 6. mRNA	0.56	108.87	0.0034
XR_865972.4	885	Gm10851	predicted gene 10851 (Gm10851). ncRNA	0.1	69.88	0.0034
XM_017317291.3	3449	Mmut	methylmalonyl-Coenzyme A mutase (Mmut). transcript variant X1. mRNA	0.05	48.09	0.0034
NR_156178.1	3852	Spag5	sperm associated antigen 5 (Spag5). transcript variant 2. non-coding RNA	0.12	109.95	0.0034
XM_036160158.1	2700	Usp16	ubiquitin specific peptidase 16 (Usp16). transcript variant X6. mRNA	0.89	24.28	0.0034
XM_030255600.2	2583	Snx10	sorting nexin 10 (Snx10). transcript variant X1. mRNA	0.04	133.44	0.0035
NM_026653.2	3058	Rpa1	replication protein A1 (Rpa1). transcript variant 2. mRNA	4.27	-2.72	0.0035
XM_006500040.5	6650	Tanc1	tetratricopeptide repeat. ankyrin repeat and coiled-coil containing 1 (Tanc1). transcript variant X16. mRNA	0.09	117.39	0.0035
XM_006524638.4	1690	Ppt2	palmitoyl-protein thioesterase 2 (Ppt2). transcript variant X2. mRNA	0.23	-109.51	0.0035
XM_006499991.4	4850	Pmepa1	prostate transmembrane protein. androgen induced 1 (Pmepa1). transcript variant X1. mRNA	0.06	111.28	0.0035
XM_017315130.2	15265	Esyt2	extended synaptotagmin-like protein 2 (Esyt2). transcript variant X2. mRNA	0.01	131.25	0.0035
XR_003956329.2	3721	Gm34872	predicted gene. 34872 (Gm34872). transcript variant X1. ncRNA	0.31	29.4	0.0035
NM_026640.2	3199	Fam111a	family with sequence similarity 111. member A (Fam111a). transcript variant 1. mRNA	6.01	-2.63	0.0035
XM_006538223.5	4436	Ubap2	ubiquitin-associated protein 2 (Ubap2). transcript variant X1. mRNA	0.03	113.95	0.0035
XM_006535620.3	2701	Cd36	CD36 molecule (Cd36). transcript variant X2. mRNA	0.04	131.03	0.0035
XM_006533580.3	6219	Slfn5	schlafen 5 (Slfn5). transcript variant X5. mRNA	0.95	5.17	0.0035
XM_036164180.1	10200	Zfp292	zinc finger protein 292 (Zfp292). transcript variant X2. mRNA	0.09	-30.75	0.0035
NM_153049.3	4128	Mrtfa	myocardin related transcription factor A (Mrtfa). transcript variant 1. mRNA	3.62	-3.59	0.0035
XM_006530229.5	1787	Selplg	selectin. platelet (p-selectin) ligand (Selplg). transcript variant X1. mRNA	24.36	-2.65	0.0035
NM_001359199.1	2511	Ubl3	ubiquitin-like 3 (Ubl3). transcript variant 2. mRNA	0.05	129.49	0.0035
XM_036159634.1	6276	Dnajc21	DnaJ heat shock protein family (Hsp40) member C21 (Dnajc21). transcript variant X2. mRNA	0.12	103.73	0.0035
XM_006513540.5	7133	Zfc3h1	zinc finger. C3H1-type containing (Zfc3h1). transcript variant X3. mRNA	0.02	132.15	0.0035
XM_006510836.3	7987	Myo6	myosin VI (Myo6). transcript variant X2. mRNA	0.2	112.49	0.0035
XM_006513865.4	930	Il22	interleukin 22 (Il22). transcript variant X1. mRNA	0.08	82.32	0.0035
NM_001372266.1	3675	Bag6	BCL2-associated athanogene 6 (Bag6). transcript variant 25. mRNA	0.03	49.57	0.0035
NM_001081213.2	5396	Ermp1	endoplasmic reticulum metallopeptidase 1 (Ermp1). transcript variant 1. mRNA	0.85	-3.75	0.0036
NM_010721.2	2871	Lmnb1	lamin B1 (Lmnb1). mRNA	6.88	2.85	0.0036
XM_036165154.1	16221	Hectd4	HECT domain E3 ubiquitin protein ligase 4 (Hectd4). transcript variant X10. mRNA	0.01	132.07	0.0036
XM_036156326.1	7109	Rb1cc1	RB1-inducible coiled-coil 1 (Rb1cc1). transcript variant X10. mRNA	0.02	148.76	0.0036
XM_006515653.4	5418	Syne3	spectrin repeat containing. nuclear envelope family member 3 (Syne3). transcript variant X3. mRNA	0.09	-143.94	0.0036
XM_036163552.1	4528	AU040320	expressed sequence AU040320 (AU040320). transcript variant X6. mRNA	0.08	-117.15	0.0036
NM_001378865.1	3434	Kdm2b	lysine (K)-specific demethylase 2B (Kdm2b). transcript variant 5. mRNA	0.11	109.24	0.0036
XM_011241911.2	3261	Tmem135	transmembrane protein 135 (Tmem135). transcript variant X2. mRNA	0.03	49.52	0.0036
XM_006514206.4	5850	Xpot	exportin. tRNA (nuclear export receptor for tRNAs) (Xpot). transcript variant X1. mRNA	0.04	111.65	0.0036
XM_036163005.1	10021	Larp1b	La ribonucleoprotein domain family. member 1B (Larp1b). transcript variant X2. mRNA	0.01	114.73	0.0036
XM_006513202.5	5315	Arid3a	AT rich interactive domain 3A (BRIGHT-like) (Arid3a). transcript variant X2. mRNA	0.09	-30.68	0.0036
NM_001285894.1	4890	Vps8	VPS8 CORVET complex subunit (Vps8). transcript variant 2. mRNA	0.04	113.47	0.0036
XM_030245223.1	1611	Actr6	ARP6 actin-related protein 6 (Actr6). transcript variant X4. mRNA	0.04	92.65	0.0036
XM_011247882.2	2083	Maged2	MAGE family member D2 (Maged2). transcript variant X2. mRNA	0.14	-104	0.0036
NM_001253696.1	2844	Zfp219	zinc finger protein 219 (Zfp219). transcript variant 4. mRNA	0.04	112.23	0.0036
XR_866572.4	12322	Gm39885	predicted gene. 39885 (Gm39885). transcript variant X1. ncRNA	0.11	105.75	0.0036
NM_001384107.1	2494	Dennd1c	DENN/MADD domain containing 1C (Dennd1c). transcript variant 2. mRNA	0.04	147.11	0.0036
XR_870457.4	3710	4930512H18Rik	RIKEN cDNA 4930512H18 gene (4930512H18Rik). transcript variant X1. ncRNA	0.1	23.59	0.0037
XM_030249029.1	15403	Lpp	LIM domain containing preferred translocation partner in lipoma (Lpp). transcript variant X3. mRNA	0.03	-126.16	0.0037
NM_001362539.1	1931	Clk4	CDC like kinase 4 (Clk4). transcript variant 6. mRNA	0.2	108.61	0.0037
NM_001081061.1	9921	Bdp1	B double prime 1. subunit of RNA polymerase III transcription initiation factor IIIB (Bdp1). mRNA	0.06	41.41	0.0037
NM_001024721.2	1294	Ifi214	interferon activated gene 214 (Ifi214). mRNA	2.91	4.33	0.0037
NM_001113487.1	3796	Septin9	septin 9 (Septin9). transcript variant 2. mRNA	0.37	-17.53	0.0037
XM_030250294.2	11867	Apc	APC. WNT signaling pathway regulator (Apc). transcript variant X34. mRNA	0.01	87.91	0.0037
XM_006510862.5	6330	Pml	promyelocytic leukemia (Pml). transcript variant X3. mRNA	1.66	3.24	0.0037
XM_011246415.3	3680	Ttc7	tetratricopeptide repeat domain 7 (Ttc7). transcript variant X5. mRNA	0.66	-14.04	0.0037
XM_006530845.4	3732	Usp10	ubiquitin specific peptidase 10 (Usp10). transcript variant X1. mRNA	0.03	128.53	0.0038
NM_001330702.1	5657	Rps6ka5	ribosomal protein S6 kinase. polypeptide 5 (Rps6ka5). transcript variant 2. mRNA	0.37	-8.52	0.0038
NM_001347452.1	2782	Zfp384	zinc finger protein 384 (Zfp384). transcript variant 3. mRNA	0.04	110.94	0.0038
NM_001310477.1	7608	Kcnq5	potassium voltage-gated channel. subfamily Q. member 5 (Kcnq5). transcript variant 3. mRNA	0.04	-32.44	0.0038
XM_030248716.1	1672	Ttc33	tetratricopeptide repeat domain 33 (Ttc33). transcript variant X1. mRNA	0.06	129.05	0.0038
NM_013923.2	4276	Rnf19a	ring finger protein 19A (Rnf19a). mRNA	3.94	2.62	0.0038
NM_153570.2	2039	Noc4l	NOC4 like (Noc4l). mRNA	3.39	2.96	0.0038
NM_172397.4	3007	Limd2	LIM domain containing 2 (Limd2). transcript variant 2. mRNA	16	-2.28	0.0038
XM_011242651.4	8323	Dennd4a	DENN/MADD domain containing 4A (Dennd4a). transcript variant X3. mRNA	2.38	22.35	0.0038
NM_013653.3	579	Ccl5	chemokine (C-C motif) ligand 5 (Ccl5). mRNA	50	3.1	0.0038
NM_001177674.2	2958	Gpr68	G protein-coupled receptor 68 (Gpr68). transcript variant 3. mRNA	0.28	-22.11	0.0038
NM_178027.4	6890	Vps26b	VPS26 retromer complex component B (Vps26b). mRNA	1.05	-2.89	0.0038
XR_004941567.1	2882	Gm35039	predicted gene. 35039 (Gm35039). ncRNA	0.2	9.7	0.0039
NM_013693.3	1653	Tnf	tumor necrosis factor (Tnf). transcript variant 1. mRNA	1.79	4.33	0.0039
NM_001277867.1	7850	Mphosph9	M-phase phosphoprotein 9 (Mphosph9). transcript variant 1. mRNA	0.06	-136.21	0.0039
NM_001313711.1	964	Prdx4	peroxiredoxin 4 (Prdx4). transcript variant 1. mRNA	0.14	123.84	0.0039
XM_030254306.2	1975	Camkk2	calcium/calmodulin-dependent protein kinase kinase 2. beta (Camkk2). transcript variant X8. mRNA	0.05	86.16	0.0039
XM_006503140.4	4594	Ermap	erythroblast membrane-associated protein (Ermap). transcript variant X3. mRNA	0.09	-108.9	0.0039
XM_036163347.1	6619	Fndc3b	fibronectin type III domain containing 3B (Fndc3b). transcript variant X15. mRNA	0.02	140.39	0.0039
NM_030203.2	3916	Tspyl4	TSPY-like 4 (Tspyl4). mRNA	0.57	-5.55	0.0039
NM_001277265.1	1809	Tbxa2r	thromboxane A2 receptor (Tbxa2r). transcript variant 2. mRNA	0.71	-7.09	0.0039
NM_001359606.1	3097	Slc16a5	solute carrier family 16 (monocarboxylic acid transporters). member 5 (Slc16a5). transcript variant 2. mRNA	0.09	-100.05	0.0039
XR_001779500.3	3498	Tcf3	transcription factor 3 (Tcf3). transcript variant X1. misc_RNA	0.17	43	0.0039
XM_036156995.1	4582	0610010F05Rik	RIKEN cDNA 0610010F05 gene (0610010F05Rik). transcript variant X9. mRNA	0.02	91.94	0.0039
XM_006518678.4	6254	Myh6	myosin. heavy polypeptide 6. cardiac muscle. alpha (Myh6). transcript variant X2. mRNA	0.02	140.13	0.0039
XM_006499065.3	3899	Src	Rous sarcoma oncogene (Src). transcript variant X3. mRNA	0.03	141.19	0.004
XM_036160865.1	1641	LOC118567343	synaptotagmin-like protein 3 (LOC118567343). transcript variant X4. mRNA	0.52	105.41	0.004
XM_017315153.1	2280	Serpina3i	serine (or cysteine) peptidase inhibitor. clade A. member 3I (Serpina3i). transcript variant X3. mRNA	0.04	28.37	0.004
XM_006534108.4	20896	Cdk12	cyclin-dependent kinase 12 (Cdk12). transcript variant X3. mRNA	0.07	107.62	0.004
XM_017314591.2	9928	Zfp672	zinc finger protein 672 (Zfp672). transcript variant X11. mRNA	0.03	-100.39	0.004
NM_015755.2	5009	Hunk	hormonally upregulated Neu-associated kinase (Hunk). mRNA	0.29	-10.31	0.004
NM_001357467.1	3809	Trim30a	tripartite motif-containing 30A (Trim30a). transcript variant 2. mRNA	4.33	2.99	0.004
NM_001285887.1	3953	Zmym6	zinc finger. MYM-type 6 (Zmym6). transcript variant 3. mRNA	0.02	98.8	0.004
XR_004936995.1	7639	Dgke	diacylglycerol kinase. epsilon (Dgke). transcript variant X4. misc_RNA	0.16	36.63	0.004
XM_017313700.2	6741	Bcl9l	B cell CLL/lymphoma 9-like (Bcl9l). transcript variant X1. mRNA	0.97	-4.3	0.004
NM_001364115.1	2996	Ggnbp2	gametogenetin binding protein 2 (Ggnbp2). transcript variant 5. mRNA	0.12	39.78	0.004
XR_003953734.2	4878	Ttpal	tocopherol (alpha) transfer protein-like (Ttpal). transcript variant X6. misc_RNA	0.28	101.8	0.004
NM_001110100.2	5489	Banp	BTG3 associated nuclear protein (Banp). transcript variant 1. mRNA	0.06	-100.98	0.004
NM_001083322.2	3179	Klrk1	killer cell lectin-like receptor subfamily K. member 1 (Klrk1). transcript variant 2. mRNA	1.16	10.72	0.004
XM_036162509.1	2148	Gpsm1	G-protein signalling modulator 1 (AGS3-like. C. elegans) (Gpsm1). transcript variant X3. mRNA	0.21	24.52	0.004
NM_027206.3	1116	Tnfaip8l2	tumor necrosis factor. alpha-induced protein 8-like 2 (Tnfaip8l2). mRNA	7.43	-2.95	0.004
XM_036157342.1	2842	Dglucy	D-glutamate cyclase (Dglucy). transcript variant X4. mRNA	0.03	86.04	0.004
NM_001134458.1	3086	Il9r	interleukin 9 receptor (Il9r). transcript variant 1. mRNA	0.08	-101.17	0.0041
NM_001170419.1	1324	Prok2	prokineticin 2 (Prok2). transcript variant 3. mRNA	0.09	96.45	0.0041
XM_011249243.1	3582	Kif18b	kinesin family member 18B (Kif18b). transcript variant X1. mRNA	0.09	103.47	0.0041
XM_006512599.2	5616	Enpp1	ectonucleotide pyrophosphatase/phosphodiesterase 1 (Enpp1). transcript variant X2. mRNA	0.02	109.96	0.0041
XM_006519720.1	3278	Fbxo34	F-box protein 34 (Fbxo34). transcript variant X14. mRNA	0.07	109.02	0.0041
NM_013631.2	2787	Pklr	pyruvate kinase liver and red blood cell (Pklr). transcript variant 1. mRNA	0.04	96.04	0.0041
NM_001170479.1	1635	Borcs5	BLOC-1 related complex subunit 5 (Borcs5). transcript variant 1. mRNA	0.12	106.52	0.0041
XM_006521903.4	6117	Yeats2	YEATS domain containing 2 (Yeats2). transcript variant X2. mRNA	0.08	-51.73	0.0041
XM_006500848.5	4383	Zzz3	zinc finger. ZZ domain containing 3 (Zzz3). transcript variant X1. mRNA	0.34	-22.5	0.0041
XM_006532979.5	7728	Synrg	synergin. gamma (Synrg). transcript variant X1. mRNA	0.08	-146.01	0.0041
XM_011250885.3	1899	Pnkp	polynucleotide kinase 3'- phosphatase (Pnkp). transcript variant X8. mRNA	0.07	115.78	0.0041
NM_001373873.1	5320	Mtmr2	myotubularin related protein 2 (Mtmr2). transcript variant 3. mRNA	0.22	100.77	0.0041
XM_036158509.1	3357	Ppp3cb	protein phosphatase 3. catalytic subunit. beta isoform (Ppp3cb). transcript variant X2. mRNA	0.03	97.38	0.0041
NM_013763.3	5588	Tbl2	transducin (beta)-like 2 (Tbl2). transcript variant 1. mRNA	0.33	-9.74	0.0041
NM_031156.4	5105	Ide	insulin degrading enzyme (Ide). mRNA	0.5	-15.75	0.0041
NM_001357828.1	3926	Tmod3	tropomodulin 3 (Tmod3). transcript variant 2. mRNA	0.12	100.17	0.0041
XM_036153621.1	3120	LOC118567481	MLV-related proviral Env polyprotein-like (LOC118567481). transcript variant X4. mRNA	13.04	2.52	0.0042
NM_001362430.1	3264	Cyb561a3	cytochrome b561 family. member A3 (Cyb561a3). transcript variant 5. mRNA	0.7	-13.2	0.0042
XR_003950038.1	5038	Pomt2	protein-O-mannosyltransferase 2 (Pomt2). transcript variant X2. misc_RNA	0.02	85.03	0.0042
NM_001360388.1	2443	Rabggta	Rab geranylgeranyl transferase. a subunit (Rabggta). transcript variant 2. mRNA	0.05	120.67	0.0042
NM_001271357.1	3163	Flcn	folliculin (Flcn). transcript variant 3. mRNA	0.1	115.1	0.0042
NM_016971.2	1088	Il22	interleukin 22 (Il22). mRNA	0.11	78.43	0.0042
NM_008498.3	4154	Lhx1	LIM homeobox protein 1 (Lhx1). mRNA	0.09	-13.19	0.0042
NM_001359081.1	4302	Gbp4	guanylate binding protein 4 (Gbp4). transcript variant 5. mRNA	1.27	8.05	0.0042
XM_006509988.3	5384	Dnmt1	DNA methyltransferase (cytosine-5) 1 (Dnmt1). transcript variant X1. mRNA	0.08	-117.21	0.0042
NM_020561.2	1791	Smpdl3a	sphingomyelin phosphodiesterase. acid-like 3A (Smpdl3a). mRNA	9.29	-2.42	0.0042
NM_001271431.1	1625	Cd82	CD82 antigen (Cd82). transcript variant 7. mRNA	0.99	27.84	0.0042
NM_018868.2	1976	Nop58	NOP58 ribonucleoprotein (Nop58). mRNA	3.38	3.07	0.0042
NM_001368812.1	7303	Pogz	pogo transposable element with ZNF domain (Pogz). transcript variant 4. mRNA	0.03	93.59	0.0042
XM_036156397.1	11680	Usp34	ubiquitin specific peptidase 34 (Usp34). transcript variant X3. mRNA	0.07	104.27	0.0043
XM_006523924.4	4090	Satb1	special AT-rich sequence binding protein 1 (Satb1). transcript variant X1. mRNA	4.68	2.46	0.0043
NM_001012236.1	1060	Trex1	three prime repair exonuclease 1 (Trex1). transcript variant 2. mRNA	6.31	3.39	0.0043
XR_004934005.1	2625	Ctsc	cathepsin C (Ctsc). transcript variant X2. misc_RNA	4.55	-2.77	0.0043
XR_388542.2	3327	Pgs1	phosphatidylglycerophosphate synthase 1 (Pgs1). transcript variant X1. misc_RNA	0.22	12.33	0.0043
XM_011245449.1	6438	Plxnb2	plexin B2 (Plxnb2). transcript variant X5. mRNA	0.01	118.59	0.0043
NR_126154.1	3517	Pik3r6	phosphoinositide-3-kinase regulatory subunit 5 (Pik3r6). transcript variant 4. non-coding RNA	0.11	-35.11	0.0043
NM_001310456.1	3281	Cdk16	cyclin-dependent kinase 16 (Cdk16). transcript variant 2. mRNA	0.08	-57.05	0.0043
XM_036152914.1	4809	Ube3a	ubiquitin protein ligase E3A (Ube3a). transcript variant X6. mRNA	0.02	92.93	0.0043
XM_036165248.1	15485	N4bp2l2	NEDD4 binding protein 2-like 2 (N4bp2l2). transcript variant X1. mRNA	0.1	103.64	0.0043
NM_175335.3	5691	Gtf2a1	general transcription factor II A. 1 (Gtf2a1). transcript variant 2. mRNA	0.1	97.98	0.0043
XM_011243260.4	3615	Slc39a3	solute carrier family 39 (zinc transporter). member 3 (Slc39a3). transcript variant X3. mRNA	0.03	117.13	0.0043
NR_168022.1	1124	Gm19696	predicted gene. 19696 (Gm19696). long non-coding RNA	0.32	-12.51	0.0044
XM_036161586.1	1933	Coro1b	coronin. actin binding protein 1B (Coro1b). transcript variant X4. mRNA	0.62	93.8	0.0044
XR_004937482.1	9387	Zfyve26	zinc finger. FYVE domain containing 26 (Zfyve26). transcript variant X4. misc_RNA	0.06	107.72	0.0044
XM_036164702.1	3967	Tbc1d14	TBC1 domain family. member 14 (Tbc1d14). transcript variant X10. mRNA	0.1	-115.43	0.0044
NM_001363015.1	1886	Slc35c2	solute carrier family 35. member C2 (Slc35c2). transcript variant 5. mRNA	0.05	118.07	0.0044
XM_030242756.1	1527	Gmppa	GDP-mannose pyrophosphorylase A (Gmppa). transcript variant X13. mRNA	0.08	103.3	0.0044
XM_011238729.3	4561	Ifi208	interferon activated gene 208 (Ifi208). transcript variant X1. mRNA	0.44	6.39	0.0044
NM_029935.6	4827	Chst15	carbohydrate sulfotransferase 15 (Chst15). transcript variant 1. mRNA	1.78	-2.79	0.0044
XM_006520376.4	8829	Cbx5	chromobox 5 (Cbx5). transcript variant X6. mRNA	0.01	98.28	0.0044
XM_006501316.4	3668	Zbtb7b	zinc finger and BTB domain containing 7B (Zbtb7b). transcript variant X2. mRNA	1.3	-10.62	0.0044
NM_001302618.1	5438	Ciita	class II transactivator (Ciita). transcript variant 4. mRNA	0.02	133.5	0.0044
NM_001357570.1	2643	Trmt1l	tRNA methyltransferase 1 like (Trmt1l). transcript variant 3. mRNA	0.42	98.32	0.0044
XM_036165447.1	1478	Sumf2	sulfatase modifying factor 2 (Sumf2). transcript variant X3. mRNA	0.19	-44.98	0.0044
NM_207237.3	4715	Man1c1	mannosidase. alpha. class 1C. member 1 (Man1c1). mRNA	0.34	-8.24	0.0044
NM_016674.4	3263	Cldn1	claudin 1 (Cldn1). mRNA	0.59	7.26	0.0044
XM_030250505.1	4242	Fchsd1	FCH and double SH3 domains 1 (Fchsd1). transcript variant X3. mRNA	0.04	102.13	0.0044
XR_001778426.3	2944	Tmco3	transmembrane and coiled-coil domains 3 (Tmco3). transcript variant X1. misc_RNA	0.21	-16.29	0.0044
NR_110962.1	3804	Trub2	TruB pseudouridine (psi) synthase family member 2 (Trub2). transcript variant 4. non-coding RNA	0.07	91.6	0.0045
XM_036156603.1	5357	Abca9	ATP-binding cassette. sub-family A (ABC1). member 9 (Abca9). transcript variant X3. mRNA	0.07	-100.89	0.0045
XM_006513900.3	5457	Rbms2	RNA binding motif. single stranded interacting protein 2 (Rbms2). transcript variant X1. mRNA	0.02	115.7	0.0045
NM_018782.2	4761	Calcrl	calcitonin receptor-like (Calcrl). mRNA	0.58	-8.25	0.0045
NM_001290758.1	3875	Tlr7	toll-like receptor 7 (Tlr7). transcript variant 5. mRNA	0.02	131.76	0.0045
NM_153137.4	2142	Traf3ip3	TRAF3 interacting protein 3 (Traf3ip3). mRNA	10.06	-2.89	0.0045
NM_030559.3	3206	Vps16	VSP16 CORVET/HOPS core subunit (Vps16). transcript variant 1. mRNA	0.04	114.81	0.0045
XM_030245969.2	6949	Usp32	ubiquitin specific peptidase 32 (Usp32). transcript variant X2. mRNA	0.07	108.43	0.0045
NM_011919.5	2433	Ing1	inhibitor of growth family. member 1 (Ing1). transcript variant 1. mRNA	1.62	-4.91	0.0045
XR_004940894.1	3110	LOC118568511	uncharacterized LOC118568511 (LOC118568511). transcript variant X2. ncRNA	0.05	66.28	0.0045
XM_036157993.1	4833	Nup153	nucleoporin 153 (Nup153). transcript variant X2. mRNA	2.88	4.17	0.0045
NM_001355262.1	3806	Ifit2	interferon-induced protein with tetratricopeptide repeats 2 (Ifit2). transcript variant 2. mRNA	0.06	114.2	0.0046
NM_031392.3	4137	Wdr6	WD repeat domain 6 (Wdr6). mRNA	1.3	-3.3	0.0046
NM_030243.5	2106	Rbm43	RNA binding motif protein 43 (Rbm43). transcript variant 1. mRNA	0.09	101.38	0.0046
XM_036158038.1	2258	Cd55	CD55 molecule. decay accelerating factor for complement (Cd55). transcript variant X4. mRNA	0.03	91.12	0.0046
XM_011242352.4	3855	Birc3	baculoviral IAP repeat-containing 3 (Birc3). transcript variant X5. mRNA	4.15	3.23	0.0046
NM_019395.3	1479	Fbp1	fructose bisphosphatase 1 (Fbp1). mRNA	0.36	8.65	0.0046
XM_036165980.1	3948	Il1rl2	interleukin 1 receptor-like 2 (Il1rl2). transcript variant X4. mRNA	0.06	16.36	0.0046
NM_030159.1	2280	Troap	trophinin associated protein (Troap). transcript variant 1. mRNA	0.09	89.91	0.0046
NM_008853.3	2151	Pja1	praja ring finger ubiquitin ligase 1 (Pja1). transcript variant 2. mRNA	0.04	94.2	0.0046
XM_006515471.3	1860	Evl	Ena-vasodilator stimulated phosphoprotein (Evl). transcript variant X2. mRNA	9.43	-2.45	0.0046
XM_036154503.1	8165	Hinfp	histone H4 transcription factor (Hinfp). transcript variant X10. mRNA	0.04	95.46	0.0046
XM_030252267.2	11403	Pikfyve	phosphoinositide kinase. FYVE type zinc finger containing (Pikfyve). transcript variant X4. mRNA	0.04	-116	0.0046
XM_030246519.2	10323	Zbtb25	zinc finger and BTB domain containing 25 (Zbtb25). transcript variant X12. mRNA	0.01	101.48	0.0046
XM_036159979.1	1647	Tango2	transport and golgi organization 2 (Tango2). transcript variant X3. mRNA	0.2	98.36	0.0046
NM_134062.2	5304	Dapk1	death associated protein kinase 1 (Dapk1). transcript variant 2. mRNA	0.09	-43.72	0.0046
NM_177767.4	5329	Ogfod1	2-oxoglutarate and iron-dependent oxygenase domain containing 1 (Ogfod1). transcript variant 1. mRNA	0.4	-9.89	0.0046
NM_001113474.1	3512	Lair1	leukocyte-associated Ig-like receptor 1 (Lair1). transcript variant a. mRNA	0.49	-11.38	0.0047
NM_013820.3	5524	Hk2	hexokinase 2 (Hk2). mRNA	1.02	3.46	0.0047
NM_153511.3	1647	Il1f9	interleukin 1 family. member 9 (Il1f9). mRNA	21.69	3.32	0.0047
XM_006531174.5	1387	Acd	adrenocortical dysplasia (Acd). transcript variant X4. mRNA	0.05	82.91	0.0047
XM_030251056.2	2657	Tctn3	tectonic family member 3 (Tctn3). transcript variant X4. mRNA	0.05	74.33	0.0047
XM_006514948.5	5068	Rnf144a	ring finger protein 144A (Rnf144a). transcript variant X2. mRNA	0.27	-21.61	0.0047
NM_023596.3	5240	Slc29a3	solute carrier family 29 (nucleoside transporters). member 3 (Slc29a3). mRNA	0.56	-7.78	0.0047
NM_001363026.1	5596	Trim37	tripartite motif-containing 37 (Trim37). transcript variant 3. mRNA	0.08	26.67	0.0047
XM_017314214.3	5105	Cnot6	CCR4-NOT transcription complex. subunit 6 (Cnot6). transcript variant X5. mRNA	0.03	87.7	0.0047
XM_017321468.2	3128	Recql	RecQ protein-like (Recql). transcript variant X1. mRNA	0.03	80.29	0.0047
XR_003952527.2	9888	Zfp236	zinc finger protein 236 (Zfp236). transcript variant X8. misc_RNA	0.21	-9.34	0.0047
XM_036163297.1	3924	Sec24d	Sec24 related gene family. member D (S. cerevisiae) (Sec24d). transcript variant X4. mRNA	0.04	111.75	0.0047
XM_036164617.1	4358	LOC118568683	MLV-related proviral Env polyprotein-like (LOC118568683). transcript variant X2. mRNA	97.08	2.38	0.0047
XM_030253138.2	2525	Cdk11b	cyclin-dependent kinase 11B (Cdk11b). transcript variant X10. mRNA	0.08	96.84	0.0047
XM_036162094.1	1300	Il10	interleukin 10 (Il10). transcript variant X1. mRNA	0.19	74.4	0.0047
XM_006531829.4	2757	Frmd8	FERM domain containing 8 (Frmd8). transcript variant X2. mRNA	1.12	-7.61	0.0047
XM_011247341.2	5082	Arhgap19	Rho GTPase activating protein 19 (Arhgap19). transcript variant X1. mRNA	0.08	-104.11	0.0047
XM_036156952.1	20869	Cdk12	cyclin-dependent kinase 12 (Cdk12). transcript variant X5. mRNA	0.03	102.58	0.0047
XR_001784520.3	4736	Gm46878	predicted gene. 46878 (Gm46878). transcript variant X1. ncRNA	0.16	8.93	0.0047
NM_001081652.1	4914	Nacad	NAC alpha domain containing (Nacad). mRNA	0.08	-104.74	0.0047
XM_006522688.3	4540	Senp2	SUMO/sentrin specific peptidase 2 (Senp2). transcript variant X1. mRNA	0.03	117.98	0.0047
NM_001358573.1	4594	Arhgef6	Rac/Cdc42 guanine nucleotide exchange factor (GEF) 6 (Arhgef6). transcript variant 2. mRNA	0.08	-102.42	0.0047
NM_007479.4	1689	Arf4	ADP-ribosylation factor 4 (Arf4). mRNA	7.74	2.38	0.0047
NM_001159401.1	1270	Upp1	uridine phosphorylase 1 (Upp1). transcript variant 3. mRNA	0.25	24.08	0.0047
XM_006510741.4	8279	Dennd4a	DENN/MADD domain containing 4A (Dennd4a). transcript variant X2. mRNA	0.86	4.67	0.0047
XM_006503847.2	2367	Tec	tec protein tyrosine kinase (Tec). transcript variant X5. mRNA	0.14	-106.53	0.0047
NM_001368626.1	1218	Aimp1	aminoacyl tRNA synthetase complex-interacting multifunctional protein 1 (Aimp1). transcript variant 2. mRNA	0.15	88.16	0.0048
XM_036163143.1	1487	Pigk	phosphatidylinositol glycan anchor biosynthesis. class K (Pigk). transcript variant X15. mRNA	0.06	36.63	0.0048
XM_011245874.4	8067	Fgd4	FYVE. RhoGEF and PH domain containing 4 (Fgd4). transcript variant X7. mRNA	0.01	91.6	0.0048
XM_006541069.2	1096	Hsd17b14	hydroxysteroid (17-beta) dehydrogenase 14 (Hsd17b14). transcript variant X1. mRNA	0.42	-122.02	0.0048
XM_011246929.4	3257	Gm4951	predicted gene 4951 (Gm4951). transcript variant X2. mRNA	0.15	20.17	0.0048
XM_006514055.4	1728	Dctn2	dynactin 2 (Dctn2). transcript variant X1. mRNA	0.08	98.58	0.0048
NM_001168511.1	1913	Ffar2	free fatty acid receptor 2 (Ffar2). transcript variant 4. mRNA	0.06	100.2	0.0049
NM_001204278.1	4228	Hdac7	histone deacetylase 7 (Hdac7). transcript variant 5. mRNA	0.1	-110.17	0.0049
XM_036156606.1	3742	Unk	unkempt family zinc finger (Unk). transcript variant X10. mRNA	0.38	99.41	0.0049
NM_030701.3	1947	Hcar2	hydroxycarboxylic acid receptor 2 (Hcar2). mRNA	3.9	3.97	0.0049
NM_001308448.1	3322	Secisbp2	SECIS binding protein 2 (Secisbp2). transcript variant 2. mRNA	0.03	111.42	0.0049
NM_001033468.3	2812	Adgrg5	adhesion G protein-coupled receptor G5 (Adgrg5). transcript variant 2. mRNA	0.03	90.57	0.0049
XM_006523252.4	8995	Tulp4	tubby like protein 4 (Tulp4). transcript variant X13. mRNA	0.01	125	0.0049
NM_007930.4	4752	Enc1	ectodermal-neural cortex 1 (Enc1). mRNA	0.36	-10.41	0.0049
NM_001281976.1	1823	Ctla4	cytotoxic T-lymphocyte-associated protein 4 (Ctla4). transcript variant 2. mRNA	0.28	25.8	0.0049
XM_006534523.2	3024	Sh3bp5l	SH3 binding domain protein 5 like (Sh3bp5l). transcript variant X1. mRNA	0.03	102.28	0.0049
XM_006505617.5	8228	Il12rb2	interleukin 12 receptor. beta 2 (Il12rb2). transcript variant X1. mRNA	0.81	3.54	0.0049
NR_166634.1	1093	Taf11	TATA-box binding protein associated factor 11 (Taf11). transcript variant 3. non-coding RNA	0.15	86.23	0.005
XM_006537518.2	3492	Tdrd7	tudor domain containing 7 (Tdrd7). transcript variant X2. mRNA	0.05	27.1	0.005
XM_036159213.1	2149	Maff	v-maf musculoaponeurotic fibrosarcoma oncogene family. protein F (avian) (Maff). transcript variant X2. mRNA	0.18	92.96	0.005
XM_030248417.2	5033	Pou6f1	POU domain. class 6. transcription factor 1 (Pou6f1). transcript variant X4. mRNA	0.05	96.69	0.005
NM_001291178.1	5723	Nfatc2	nuclear factor of activated T cells. cytoplasmic. calcineurin dependent 2 (Nfatc2). transcript variant 15. mRNA	0.07	-115.22	0.005
NM_010697.2	2299	Ldb1	LIM domain binding 1 (Ldb1). transcript variant 3. mRNA	0.09	34.53	0.005
XM_036156552.1	4907	Tom1l2	target of myb1-like 2 (chicken) (Tom1l2). transcript variant X7. mRNA	0.02	123.96	0.005
XM_006506762.5	8367	Krba1	KRAB-A domain containing 1 (Krba1). transcript variant X6. mRNA	0.06	85.43	0.005
XM_006500965.5	2708	Clca3a1	chloride channel accessory 3A1 (Clca3a1). transcript variant X1. mRNA	0.03	124.33	0.005
NM_001372485.1	1874	Sphk1	sphingosine kinase 1 (Sphk1). transcript variant 7. mRNA	0.17	35.41	0.005
XM_006526678.2	4018	Ganab	alpha glucosidase 2 alpha neutral subunit (Ganab). transcript variant X2. mRNA	0.08	-47.58	0.005
NM_011436.4	10726	Sorl1	sortilin-related receptor. LDLR class A repeats-containing (Sorl1). transcript variant 1. mRNA	9.17	-3.12	0.0051
NM_172465.4	2995	Zdhhc9	zinc finger. DHHC domain containing 9 (Zdhhc9). mRNA	1.54	-6.82	0.0051
NM_001252600.1	1783	Irf7	interferon regulatory factor 7 (Irf7). transcript variant 2. mRNA	1.44	6.61	0.0051
NM_007826.3	5466	Dach1	dachshund family transcription factor 1 (Dach1). transcript variant 1. mRNA	0.15	19.95	0.0051
NM_008698.3	1944	Nipsnap1	nipsnap homolog 1 (Nipsnap1). mRNA	0.5	-9.36	0.0051
NR_110957.1	4273	Inpp5e	inositol polyphosphate-5-phosphatase E (Inpp5e). transcript variant 3. non-coding RNA	0.47	25.24	0.0051
XM_036164998.1	2492	Txk	TXK tyrosine kinase (Txk). transcript variant X1. mRNA	4.15	4.48	0.0051
NM_173027.2	2305	Ip6k3	inositol hexaphosphate kinase 3 (Ip6k3). mRNA	0.18	-13.3	0.0051
XM_011246928.4	3244	Gm4951	predicted gene 4951 (Gm4951). transcript variant X1. mRNA	0.02	79.43	0.0051
NM_013926.1	1413	Cbx8	chromobox 8 (Cbx8). mRNA	0.69	-7.29	0.0051
NM_011924.2	4148	Avpr1b	arginine vasopressin receptor 1B (Avpr1b). mRNA	0.11	17.15	0.0052
NM_145508.2	2072	Dyrk3	dual-specificity tyrosine-(Y)-phosphorylation regulated kinase 3 (Dyrk3). mRNA	0.93	15.23	0.0052
XM_011240423.4	3019	Csf3r	colony stimulating factor 3 receptor (granulocyte) (Csf3r). transcript variant X8. mRNA	0.03	122.13	0.0052
XM_006537712.2	1759	Slc31a2	solute carrier family 31. member 2 (Slc31a2). transcript variant X1. mRNA	0.05	122.13	0.0052
XM_036163806.1	5280	Mast2	microtubule associated serine/threonine kinase 2 (Mast2). transcript variant X15. mRNA	0.02	122.3	0.0052
NM_009952.2	8431	Creb1	cAMP responsive element binding protein 1 (Creb1). transcript variant B. mRNA	0.04	-35.12	0.0052
XM_030245859.2	3261	Kat7	K(lysine) acetyltransferase 7 (Kat7). transcript variant X5. mRNA	0.03	121.85	0.0052
XM_036161877.1	5876	Stag2	stromal antigen 2 (Stag2). transcript variant X13. mRNA	0.02	121.85	0.0052
XM_006516468.5	4540	Chrm3	cholinergic receptor. muscarinic 3. cardiac (Chrm3). transcript variant X1. mRNA	0.2	-15.15	0.0052
XM_036165691.1	7316	Usp37	ubiquitin specific peptidase 37 (Usp37). transcript variant X3. mRNA	0.11	93.89	0.0053
XR_003950046.2	3439	Cmpk2	cytidine monophosphate (UMP-CMP) kinase 2. mitochondrial (Cmpk2). transcript variant X1. misc_RNA	0.59	10.87	0.0053
XM_006527855.5	4526	Kif4	kinesin family member 4 (Kif4). transcript variant X1. mRNA	0.09	28.5	0.0053
NR_028061.1	2065	Gm8615	predicted pseudogene 8615 (Gm8615). non-coding RNA	1.48	-4.77	0.0053
XM_006534269.4	2650	Tom1l1	target of myb1-like 1 (chicken) (Tom1l1). transcript variant X2. mRNA	0.04	28.3	0.0053
XM_036158023.1	7144	Srek1	splicing regulatory glutamine/lysine-rich protein 1 (Srek1). transcript variant X6. mRNA	0.41	18.22	0.0053
XM_036152857.1	4532	Fanci	Fanconi anemia. complementation group I (Fanci). transcript variant X2. mRNA	0.18	93.76	0.0053
NM_011454.2	2141	Serpinb6b	serine (or cysteine) peptidase inhibitor. clade B. member 6b (Serpinb6b). mRNA	1.73	4.22	0.0053
NM_031252.2	1359	Il23a	interleukin 23. alpha subunit p19 (Il23a). mRNA	0.3	29.37	0.0053
XM_030251511.2	4361	Arhgef6	Rac/Cdc42 guanine nucleotide exchange factor (GEF) 6 (Arhgef6). transcript variant X8. mRNA	0.08	-106.03	0.0053
NM_007928.3	4664	Mark2	MAP/microtubule affinity regulating kinase 2 (Mark2). transcript variant 1. mRNA	0.02	105.93	0.0053
XM_036165865.1	2086	Thumpd3	THUMP domain containing 3 (Thumpd3). transcript variant X3. mRNA	0.03	105.65	0.0053
XM_006529448.4	8459	Zbtb41	zinc finger and BTB domain containing 41 (Zbtb41). transcript variant X3. mRNA	0.02	120.95	0.0053
XM_036162940.1	4083	Prkacb	protein kinase. cAMP dependent. catalytic. beta (Prkacb). transcript variant X1. mRNA	0.07	91.11	0.0053
XM_011243447.3	3467	Cdk17	cyclin-dependent kinase 17 (Cdk17). transcript variant X5. mRNA	0.4	96.47	0.0054
XM_006501588.5	8519	Med12l	mediator complex subunit 12-like (Med12l). transcript variant X7. mRNA	0.01	121.18	0.0054
XM_036165140.1	1777	Oas2	2'-5' oligoadenylate synthetase 2 (Oas2). transcript variant X2. mRNA	0.37	15.75	0.0054
XM_006532342.1	3375	Lasp1	LIM and SH3 protein 1 (Lasp1). transcript variant X2. mRNA	0.12	100.87	0.0054
XM_030247889.2	7647	Sfmbt1	Scm-like with four mbt domains 1 (Sfmbt1). transcript variant X5. mRNA	0.06	-37.98	0.0054
XR_004939634.1	1455	LOC118567343	synaptotagmin-like protein 3 (LOC118567343). transcript variant X3. misc_RNA	0.42	25.74	0.0054
XM_030245891.2	2105	Cd300a	CD300A molecule (Cd300a). transcript variant X1. mRNA	0.19	-28.98	0.0054
XM_006498069.4	7596	Cntrl	centriolin (Cntrl). transcript variant X1. mRNA	0.06	-129.42	0.0054
XM_006527721.5	10407	Nhsl2	NHS-like 2 (Nhsl2). transcript variant X6. mRNA	0.01	90.06	0.0054
NM_010229.2	3664	Flt3	FMS-like tyrosine kinase 3 (Flt3). mRNA	0.24	-8.29	0.0054
NM_011811.4	2274	Farsb	phenylalanyl-tRNA synthetase. beta subunit (Farsb). transcript variant 1. mRNA	0.06	76.6	0.0054
NM_013706.2	531	Cd52	CD52 antigen (Cd52). mRNA	78.31	-2.52	0.0054
XM_030250695.1	1778	Stn1	STN1. CST complex subunit (Stn1). transcript variant X1. mRNA	0.09	25.51	0.0054
NM_145976.4	3434	Tifab	TRAF-interacting protein with forkhead-associated domain. family member B (Tifab). transcript variant 2. mRNA	0.42	-10.46	0.0054
XM_036162090.1	1433	Pir	pirin (Pir). transcript variant X2. mRNA	0.04	77.86	0.0054
NM_001042591.1	4102	Arrdc3	arrestin domain containing 3 (Arrdc3). transcript variant 1. mRNA	2.36	-4.07	0.0054
XM_006515926.4	6303	Ppp2r5e	protein phosphatase 2. regulatory subunit B'. epsilon (Ppp2r5e). transcript variant X2. mRNA	0.07	-28.57	0.0054
NM_029128.2	2838	Qtrt2	queuine tRNA-ribosyltransferase accessory subunit 2 (Qtrt2). transcript variant 3. mRNA	0.14	87.77	0.0054
NM_183368.2	1504	Sytl3	synaptotagmin-like 3 (Sytl3). transcript variant 3. mRNA	4.29	8.2	0.0055
NM_001360723.1	2570	Slc25a22	solute carrier family 25 (mitochondrial carrier. glutamate). member 22 (Slc25a22). transcript variant 3. mRNA; nuclear gene for mitochondrial product	1.73	6.93	0.0055
NM_001033922.2	1730	Treml4	triggering receptor expressed on myeloid cells-like 4 (Treml4). transcript variant 1. mRNA	0.93	-12.98	0.0055
NM_009020.4	3429	Rag2	recombination activating gene 2 (Rag2). mRNA	0.04	81.83	0.0055
XR_388423.5	3014	Tmc6	transmembrane channel-like gene family 6 (Tmc6). transcript variant X11. misc_RNA	0.02	86.86	0.0055
NM_001289784.1	885	Cryab	crystallin. alpha B (Cryab). transcript variant 3. mRNA	0.13	119.46	0.0055
NM_026373.4	911	Cdk2ap2	CDK2-associated protein 2 (Cdk2ap2). mRNA	16.9	-2.44	0.0055
XR_873685.3	2480	Gm41005	predicted gene. 41005 (Gm41005). ncRNA	0.52	12.92	0.0055
NM_001113420.1	1535	Schip1	schwannomin interacting protein 1 (Schip1). transcript variant 2. mRNA	0.74	14.78	0.0055
XM_006535521.4	6996	Tnik	TRAF2 and NCK interacting kinase (Tnik). transcript variant X5. mRNA	0.07	-128.26	0.0055
NM_145968.2	3076	Tagap	T cell activation Rho GTPase activating protein (Tagap). mRNA	7.71	2.29	0.0055
XM_006532274.4	2958	Hgs	HGF-regulated tyrosine kinase substrate (Hgs). transcript variant X5. mRNA	0.09	-90.61	0.0055
XM_036161094.1	3683	AW554918	expressed sequence AW554918 (AW554918). transcript variant X2. mRNA	0.15	-27.1	0.0055
XR_004938106.1	2325	Gm33315	predicted gene. 33315 (Gm33315). transcript variant X2. ncRNA	0.08	65.82	0.0056
NM_024201.3	3430	Ccdc127	coiled-coil domain containing 127 (Ccdc127). transcript variant 2. mRNA	0.05	83.42	0.0056
NM_023386.5	1573	Rtp4	receptor transporter protein 4 (Rtp4). mRNA	0.99	9.76	0.0056
XM_006520475.5	1651	Hsf1	heat shock factor 1 (Hsf1). transcript variant X2. mRNA	0.04	93.87	0.0056
XM_011244703.3	3506	Ccdc125	coiled-coil domain containing 125 (Ccdc125). transcript variant X2. mRNA	0.25	-16.44	0.0056
NM_172843.4	5857	Tor1aip2	torsin A interacting protein 2 (Tor1aip2). transcript variant 5. mRNA	0.01	116.89	0.0056
NM_001358005.1	898	Ly6i	lymphocyte antigen 6 complex. locus I (Ly6i). transcript variant 2. mRNA	0.41	-31.82	0.0056
NM_001290710.1	4999	Ebf1	early B cell factor 1 (Ebf1). transcript variant 3. mRNA	0.07	98.53	0.0057
XM_030242351.2	3338	Tial1	Tia1 cytotoxic granule-associated RNA binding protein-like 1 (Tial1). transcript variant X12. mRNA	0.12	87.12	0.0057
NM_001304551.1	5094	Stil	Scl/Tal1 interrupting locus (Stil). transcript variant 3. mRNA	0.04	90.15	0.0057
XM_006504822.2	2501	Zkscan5	zinc finger with KRAB and SCAN domains 5 (Zkscan5). transcript variant X2. mRNA	0.26	93.3	0.0057
NM_026169.4	3166	Frmd8	FERM domain containing 8 (Frmd8). mRNA	2.31	-3.13	0.0057
XM_006516052.5	3532	Zbtb42	zinc finger and BTB domain containing 42 (Zbtb42). transcript variant X1. mRNA	0.11	-112.08	0.0057
XM_036156605.1	3536	Unk	unkempt family zinc finger (Unk). transcript variant X9. mRNA	0.11	87.3	0.0058
XM_006504867.5	2454	Slc46a3	solute carrier family 46. member 3 (Slc46a3). transcript variant X2. mRNA	0.44	-12.31	0.0058
XM_030246256.1	1055	Slc25a39	solute carrier family 25. member 39 (Slc25a39). transcript variant X5. mRNA	2.9	11.58	0.0058
XM_006522470.4	2734	Hspbap1	Hspb associated protein 1 (Hspbap1). transcript variant X2. mRNA	0.03	27.07	0.0058
NM_009639.3	1436	Crisp3	cysteine-rich secretory protein 3 (Crisp3). mRNA	0.48	-11.04	0.0058
NM_001368419.1	4631	Dap3	death associated protein 3 (Dap3). transcript variant 3. mRNA; nuclear gene for mitochondrial product	0.03	79.81	0.0059
XR_865664.2	968	Gm39685	predicted gene. 39685 (Gm39685). ncRNA	0.21	-18.89	0.0059
NM_001271677.1	1801	Ifi47	interferon gamma inducible protein 47 (Ifi47). transcript variant 3. mRNA	5.48	4.85	0.0059
XR_003946424.2	2986	Sh2b1	SH2B adaptor protein 1 (Sh2b1). transcript variant X10. misc_RNA	0.11	79.48	0.0059
NM_029600.4	5016	Abcc3	ATP-binding cassette. sub-family C (CFTR/MRP). member 3 (Abcc3). transcript variant 2. mRNA	0.05	-91.43	0.0059
NM_001167949.2	8292	Atp2b4	ATPase. Ca++ transporting. plasma membrane 4 (Atp2b4). transcript variant a. mRNA	0.05	84.31	0.0059
NM_013781.3	3105	Sh2d3c	SH2 domain containing 3C (Sh2d3c). transcript variant 1. mRNA	4.56	-4.18	0.0059
NM_001167923.1	9297	Col6a5	collagen. type VI. alpha 5 (Col6a5). mRNA	0.01	18.65	0.0059
XM_006527718.5	18155	Nhsl2	NHS-like 2 (Nhsl2). transcript variant X3. mRNA	0	92.98	0.006
XM_006539765.5	2240	Lilra5	leukocyte immunoglobulin-like receptor. subfamily A (with TM domain). member 5 (Lilra5). transcript variant X3. mRNA	0.19	-18.41	0.006
XM_006511719.4	2293	Parp3	poly (ADP-ribose) polymerase family. member 3 (Parp3). transcript variant X2. mRNA	0.03	92.66	0.006
XR_004934844.1	6599	Pkn1	protein kinase N1 (Pkn1). transcript variant X3. misc_RNA	0.01	93.37	0.006
XM_036164458.1	2130	Aamp	angio-associated migratory protein (Aamp). transcript variant X1. mRNA	0.32	27.32	0.006
XR_004942505.1	3359	Gak	cyclin G associated kinase (Gak). transcript variant X7. misc_RNA	0.05	88.04	0.006
NM_011984.2	2436	Homer3	homer scaffolding protein 3 (Homer3). transcript variant 2. mRNA	0.03	100.96	0.006
NM_001289447.1	1308	Rad1	RAD1 checkpoint DNA exonuclease (Rad1). transcript variant 2. mRNA	0.13	22.88	0.006
NM_001252685.1	5559	Smc5	structural maintenance of chromosomes 5 (Smc5). transcript variant 3. mRNA	0.02	101.63	0.006
NR_102690.1	7806	Mphosph9	M-phase phosphoprotein 9 (Mphosph9). transcript variant 3. non-coding RNA	0.05	-39.95	0.006
XM_030254511.2	3639	Oas3	2'-5' oligoadenylate synthetase 3 (Oas3). transcript variant X1. mRNA	0.32	10.58	0.006
NM_009383.2	4292	Tial1	Tia1 cytotoxic granule-associated RNA binding protein-like 1 (Tial1). transcript variant 1. mRNA	0.02	89.76	0.006
XR_377167.2	624	Gm30603	predicted gene. 30603 (Gm30603). ncRNA	1.52	-6.93	0.006
NM_001361630.1	2520	Tdrp	testis development related protein (Tdrp). transcript variant 5. mRNA	0.03	113.8	0.0061
XM_030248313.2	2526	Dab2	disabled 2. mitogen-responsive phosphoprotein (Dab2). transcript variant X4. mRNA	0.04	29	0.0061
XM_036154670.1	9235	Myo5a	myosin VA (Myo5a). transcript variant X8. mRNA	0.01	101.3	0.0061
XM_036152402.1	3590	Csgalnact2	chondroitin sulfate N-acetylgalactosaminyltransferase 2 (Csgalnact2). transcript variant X2. mRNA	0.02	88.94	0.0061
XR_375582.4	3992	Alpk1	alpha-kinase 1 (Alpk1). transcript variant X5. misc_RNA	0.09	25.51	0.0061
XR_383826.5	1818	Otulinl	OTU deubiquitinase with linear linkage specificity like (Otulinl). transcript variant X1. misc_RNA	2.98	-3.26	0.0061
XM_036163646.1	2173	Dffb	DNA fragmentation factor. beta subunit (Dffb). transcript variant X5. mRNA	0.04	88.94	0.0061
NR_160908.1	3334	Ifi213	interferon activated gene 213 (Ifi213). transcript variant 6. non-coding RNA	0.23	9.35	0.0061
NM_145387.5	3171	Pgghg	protein glucosylgalactosylhydroxylysine glucosidase (Pgghg). transcript variant 1. mRNA	0.69	-8.68	0.0061
NM_145610.2	1671	Ppan	peter pan homolog (Ppan). mRNA	3.8	3.11	0.0061
XM_036162056.1	5222	Pcmtd2	protein-L-isoaspartate (D-aspartate) O-methyltransferase domain containing 2 (Pcmtd2). transcript variant X3. mRNA	0.17	26.96	0.0061
NM_134054.2	1363	Sptssa	serine palmitoyltransferase. small subunit A (Sptssa). mRNA	2.99	-3.61	0.0062
XM_006516556.4	2835	Hfe	homeostatic iron regulator (Hfe). transcript variant X1. mRNA	0.63	-6.74	0.0062
NM_001361923.1	3486	Gpbp1	GC-rich promoter binding protein 1 (Gpbp1). transcript variant 3. mRNA	0.13	87.24	0.0062
NM_001039169.1	2260	Eif4e2	eukaryotic translation initiation factor 4E member 2 (Eif4e2). transcript variant 2. mRNA	0.05	46.51	0.0062
XR_382292.3	2685	Gm34020	predicted gene. 34020 (Gm34020). transcript variant X1. ncRNA	0.14	-17.41	0.0062
XM_017314613.3	2577	Xaf1	XIAP associated factor 1 (Xaf1). transcript variant X2. mRNA	0.51	91.47	0.0062
XM_030251078.2	3838	Mms19	MMS19 cytosolic iron-sulfur assembly component (Mms19). transcript variant X9. mRNA	0.02	99.26	0.0062
NM_023733.3	2803	Crot	carnitine O-octanoyltransferase (Crot). mRNA	1.47	-3.5	0.0062
XM_006541042.4	2006	Pnkp	polynucleotide kinase 3'- phosphatase (Pnkp). transcript variant X5. mRNA	0.19	38.85	0.0062
NM_027521.3	3480	Arhgap45	Rho GTPase activating protein 45 (Arhgap45). transcript variant 2. mRNA	13.15	-2.69	0.0062
XR_004934735.1	4486	Niban3	niban apoptosis regulator 3 (Niban3). transcript variant X13. misc_RNA	0.06	45.11	0.0062
NM_001077698.1	3774	Fmnl1	formin-like 1 (Fmnl1). transcript variant 2. mRNA	12.32	-2.56	0.0062
NM_001291111.1	1843	Gss	glutathione synthetase (Gss). transcript variant 2. mRNA	0.11	88.61	0.0062
NM_011762.3	3815	Zfp59	zinc finger protein 59 (Zfp59). mRNA	0.17	-19.1	0.0062
XM_030243728.1	4220	Uck2	uridine-cytidine kinase 2 (Uck2). transcript variant X4. mRNA	0.04	36.97	0.0062
NM_133871.3	2860	Ifi44	interferon-induced protein 44 (Ifi44). transcript variant 1. mRNA	0.03	79.34	0.0062
XM_030253835.2	6931	Zcchc2	zinc finger. CCHC domain containing 2 (Zcchc2). transcript variant X4. mRNA	0.05	-101.45	0.0062
XM_006529112.5	1889	Chil1	chitinase-like 1 (Chil1). transcript variant X1. mRNA	9.27	4.48	0.0062
XM_030244962.1	640	Rps12	ribosomal protein S12 (Rps12). transcript variant X2. mRNA	2.03	91.09	0.0063
XR_004936062.1	26245	Gm28175	predicted gene 28175 (Gm28175). transcript variant X20. ncRNA	0	79.01	0.0063
XM_030253058.2	2698	Osbpl9	oxysterol binding protein-like 9 (Osbpl9). transcript variant X4. mRNA	0.05	87.01	0.0063
XM_030246250.2	2551	Fam114a2	family with sequence similarity 114. member A2 (Fam114a2). transcript variant X7. mRNA	0.04	96.98	0.0063
NM_001163579.1	5675	Lrrcc1	leucine rich repeat and coiled-coil domain containing 1 (Lrrcc1). transcript variant 1. mRNA	0.11	-21.48	0.0063
XM_017321410.1	9840	Itpr1	inositol 1.4.5-trisphosphate receptor 1 (Itpr1). transcript variant X17. mRNA	0.01	110.82	0.0063
NM_011662.3	592	Tyrobp	TYRO protein tyrosine kinase binding protein (Tyrobp). mRNA	72.64	-2.56	0.0063
XM_006510671.5	2800	Ift46	intraflagellar transport 46 (Ift46). transcript variant X1. mRNA	22.27	5.54	0.0064
XM_036160857.1	1941	Sytl3	synaptotagmin-like 3 (Sytl3). transcript variant X7. mRNA	0.46	26.07	0.0064
XM_036154443.1	3107	LOC118567621	MLV-related proviral Env polyprotein-like (LOC118567621). transcript variant X3. mRNA	14.95	2.49	0.0064
NM_001139509.1	3026	Nr4a2	nuclear receptor subfamily 4. group A. member 2 (Nr4a2). transcript variant 2. mRNA	0.02	71.38	0.0064
XM_011239938.3	7782	Gmeb2	glucocorticoid modulatory element binding protein 2 (Gmeb2). transcript variant X7. mRNA	0.06	77.31	0.0064
NM_001081394.1	3607	Tmem248	transmembrane protein 248 (Tmem248). transcript variant 2. mRNA	0.05	96.35	0.0064
NM_001356442.1	2824	Trmt6	tRNA methyltransferase 6 (Trmt6). transcript variant 2. mRNA	0.04	97.67	0.0064
XR_390314.4	4146	Nsmaf	neutral sphingomyelinase (N-SMase) activation associated factor (Nsmaf). transcript variant X8. misc_RNA	0.12	84.67	0.0064
NM_009770.3	1414	Btg3	BTG anti-proliferation factor 3 (Btg3). transcript variant 1. mRNA	0.21	-92.65	0.0065
XM_036160292.1	3580	Dll1	delta like canonical Notch ligand 1 (Dll1). transcript variant X2. mRNA	0.02	86.46	0.0065
NM_001289492.3	2786	Gbp3	guanylate binding protein 3 (Gbp3). transcript variant 1. mRNA	0.04	97.51	0.0065
XM_011239091.3	2671	Gtdc1	glycosyltransferase-like domain containing 1 (Gtdc1). transcript variant X1. mRNA	0.05	85.15	0.0065
XM_036161892.1	3155	Ypel4	yippee like 4 (Ypel4). transcript variant X2. mRNA	0.69	6.93	0.0065
NM_001362111.1	4212	Fam234b	family with sequence similarity 234. member B (Fam234b). transcript variant 3. mRNA	0.11	28.36	0.0065
NM_001331013.1	1658	Zfand1	zinc finger. AN1-type domain 1 (Zfand1). transcript variant 2. mRNA	0.03	70.99	0.0065
NM_001042489.2	2790	Hvcn1	hydrogen voltage-gated channel 1 (Hvcn1). transcript variant 1. mRNA	3.46	-5.59	0.0065
XM_006504674.5	2922	Snx8	sorting nexin 8 (Snx8). transcript variant X5. mRNA	0.03	87.46	0.0066
NM_001358905.1	3256	Rbm10	RNA binding motif protein 10 (Rbm10). transcript variant 6. mRNA	0.03	108.91	0.0066
XR_004938218.1	23965	Gm26803	predicted gene. 26803 (Gm26803). transcript variant X10. ncRNA	0.02	-109.87	0.0066
NM_001166375.1	3942	Marchf1	membrane associated ring-CH-type finger 1 (Marchf1). transcript variant 2. mRNA	1.98	-4.03	0.0066
NM_001377089.1	6148	Otud3	OTU domain containing 3 (Otud3). transcript variant 1. mRNA	0.05	-108.56	0.0066
XM_011240768.4	1907	Mfsd10	major facilitator superfamily domain containing 10 (Mfsd10). transcript variant X6. mRNA	0.04	35.24	0.0066
XM_006534689.5	4300	Gbp6	guanylate binding protein 6 (Gbp6). transcript variant X5. mRNA	0.24	16.96	0.0066
XM_006533679.4	6493	Mink1	misshapen-like kinase 1 (zebrafish) (Mink1). transcript variant X3. mRNA	0.01	95.27	0.0066
XM_017321471.3	3126	Scnn1a	sodium channel. nonvoltage-gated 1 alpha (Scnn1a). transcript variant X1. mRNA	0.07	-83.89	0.0066
XM_030253441.2	3429	Lrrc41	leucine rich repeat containing 41 (Lrrc41). transcript variant X1. mRNA	0.09	77.66	0.0066
NM_001252440.1	5892	D16Ertd472e	DNA segment. Chr 16. ERATO Doi 472. expressed (D16Ertd472e). transcript variant 4. mRNA	0.67	10.67	0.0066
XM_030249144.2	5819	Abcc5	ATP-binding cassette. sub-family C (CFTR/MRP). member 5 (Abcc5). transcript variant X3. mRNA	0.04	88.85	0.0066
NM_173182.3	6915	Fndc3b	fibronectin type III domain containing 3B (Fndc3b). transcript variant 1. mRNA	0.06	-117.49	0.0066
NM_001347163.1	6232	Zfyve9	zinc finger. FYVE domain containing 9 (Zfyve9). transcript variant 1. mRNA	0.05	-92.22	0.0066
NM_028731.5	5556	Esyt2	extended synaptotagmin-like protein 2 (Esyt2). mRNA	2.04	-2.45	0.0066
NM_172692.3	3552	Gba2	glucosidase beta 2 (Gba2). mRNA	1.52	-3.62	0.0066
NM_008381.4	4279	Inhbb	inhibin beta-B (Inhbb). mRNA	0.02	16.61	0.0066
NM_028809.1	1271	Arpc5l	actin related protein 2/3 complex. subunit 5-like (Arpc5l). mRNA	6.16	-2.68	0.0066
XM_006530569.4	11554	Chd9	chromodomain helicase DNA binding protein 9 (Chd9). transcript variant X6. mRNA	0.05	-128.34	0.0066
NM_022995.3	4531	Pmepa1	prostate transmembrane protein. androgen induced 1 (Pmepa1). mRNA	0.33	5.67	0.0066
NR_153655.1	896	Zbtb32	zinc finger and BTB domain containing 32 (Zbtb32). transcript variant 2. non-coding RNA	0.09	96.15	0.0066
NM_001364173.1	1322	Ifi27	interferon. alpha-inducible protein 27 (Ifi27). transcript variant 6. mRNA	0.81	6.76	0.0066
XM_006540399.4	6151	Sipa1l3	signal-induced proliferation-associated 1 like 3 (Sipa1l3). transcript variant X8. mRNA	0.06	-90.97	0.0066
NM_001360654.1	3407	Lsm14a	LSM14A mRNA processing body assembly factor (Lsm14a). transcript variant 2. mRNA	0.02	107.04	0.0067
NM_001289915.1	2134	Cd83	CD83 antigen (Cd83). transcript variant 2. mRNA	2.41	8.34	0.0067
NM_013487.3	1330	Cd3d	CD3 antigen. delta polypeptide (Cd3d). mRNA	9.57	-2.67	0.0067
NM_001081091.1	5768	Cep152	centrosomal protein 152 (Cep152). mRNA	0.08	-38.45	0.0067
NM_011369.3	2187	Shcbp1	Shc SH2-domain binding protein 1 (Shcbp1). mRNA	0.39	7.35	0.0067
XM_030246330.2	2930	Pnpt1	polyribonucleotide nucleotidyltransferase 1 (Pnpt1). transcript variant X2. mRNA	0.17	28.11	0.0067
NM_001313984.1	1209	Ubb	ubiquitin B (Ubb). transcript variant 2. mRNA	242.45	5.06	0.0067
NM_019966.3	2112	Mlycd	malonyl-CoA decarboxylase (Mlycd). transcript variant 1. mRNA; nuclear gene for mitochondrial product	0.16	-107.36	0.0068
NM_011190.3	906	Psme2	proteasome (prosome. macropain) activator subunit 2 (PA28 beta) (Psme2). transcript variant 1. mRNA	15.42	2.55	0.0068
NM_001164705.2	10124	Amer2	APC membrane recruitment 2 (Amer2). transcript variant 2. mRNA	0.07	-9.69	0.0068
XM_006538714.3	1937	Tmem51	transmembrane protein 51 (Tmem51). transcript variant X5. mRNA	0.17	-89.11	0.0068
XR_004942511.1	6343	Katnal1	katanin p60 subunit A-like 1 (Katnal1). transcript variant X4. misc_RNA	0.12	86.48	0.0068
NM_001320332.1	917	Klk1	kallikrein 1 (Klk1). transcript variant 3. mRNA	0.06	68.18	0.0068
XM_030249844.2	2091	Rasal3	RAS protein activator like 3 (Rasal3). transcript variant X4. mRNA	0.43	-21.34	0.0068
XM_036161158.1	1926	Map3k8	mitogen-activated protein kinase kinase kinase 8 (Map3k8). transcript variant X4. mRNA	2.29	10.62	0.0068
XM_036164792.1	5149	Tor1aip2	torsin A interacting protein 2 (Tor1aip2). transcript variant X4. mRNA	0.61	12.71	0.0068
XM_006527393.3	2746	Psd	pleckstrin and Sec7 domain containing (Psd). transcript variant X18. mRNA	4.15	3.63	0.0068
XR_004940731.1	4039	Fmnl2	formin-like 2 (Fmnl2). transcript variant X8. misc_RNA	0.02	33.74	0.0068
NM_011962.3	3278	Plod3	procollagen-lysine. 2-oxoglutarate 5-dioxygenase 3 (Plod3). mRNA	2.26	-2.95	0.0068
NM_175022.3	7338	Prr12	proline rich 12 (Prr12). mRNA	0.79	-3.43	0.0068
XM_006502709.3	3439	Csf3r	colony stimulating factor 3 receptor (granulocyte) (Csf3r). transcript variant X2. mRNA	0.13	-36.73	0.0068
NR_153833.1	1288	Ptma	prothymosin alpha (Ptma). transcript variant 4. non-coding RNA	2.77	4.45	0.0069
XM_036164820.1	5729	Hgf	hepatocyte growth factor (Hgf). transcript variant X1. mRNA	0.18	-7.65	0.0069
NM_025831.3	1872	Pxdc1	PX domain containing 1 (Pxdc1). transcript variant 2. mRNA	1.52	-5.77	0.0069
XM_036157643.1	14135	Asxl2	additional sex combs like 2. transcriptional regulator (Asxl2). transcript variant X9. mRNA	0.1	25.1	0.0069
XM_006511027.4	5209	Tle3	transducin-like enhancer of split 3 (Tle3). transcript variant X5. mRNA	0.05	27.17	0.0069
NM_010552.3	1171	Il17a	interleukin 17A (Il17a). mRNA	0.05	71.25	0.0069
XM_006517232.2	6978	Ttc37	tetratricopeptide repeat domain 37 (Ttc37). transcript variant X1. mRNA	0.04	-86.86	0.0069
XM_017314471.3	3014	Ggnbp2	gametogenetin binding protein 2 (Ggnbp2). transcript variant X4. mRNA	0.03	50.55	0.0069
NM_023370.3	11096	Cdh23	cadherin 23 (otocadherin) (Cdh23). transcript variant 1. mRNA	0.01	84.47	0.0069
NM_001372529.1	3372	Tbkbp1	TBK1 binding protein 1 (Tbkbp1). transcript variant 4. mRNA	0.08	-84.29	0.0069
XM_006534461.5	6446	Cyfip2	cytoplasmic FMR1 interacting protein 2 (Cyfip2). transcript variant X1. mRNA	0.05	-97.13	0.0069
NM_001362744.1	5587	Srr	serine racemase (Srr). transcript variant 5. mRNA	0.13	85.17	0.007
NM_001291509.1	6890	Pbx1	pre B cell leukemia homeobox 1 (Pbx1). transcript variant d. mRNA	0.02	24.8	0.007
NM_009194.3	6520	Slc12a2	solute carrier family 12. member 2 (Slc12a2). mRNA	0.53	-3.78	0.007
NM_001205353.1	4310	Gramd4	GRAM domain containing 4 (Gramd4). transcript variant 2. mRNA	0.1	87.1	0.007
XM_006520250.3	2911	Mtbp	Mdm2. transformed 3T3 cell double minute p53 binding protein (Mtbp). transcript variant X4. mRNA	0.03	78.27	0.0071
XR_003949391.1	1813	Nle1	notchless homolog 1 (Nle1). transcript variant X5. misc_RNA	0.08	71.55	0.0071
XM_036160633.1	6524	Dclre1c	DNA cross-link repair 1C (Dclre1c). transcript variant X18. mRNA	0.04	-85.59	0.0071
NM_010184.2	1026	Fcer1a	Fc receptor. IgE. high affinity I. alpha polypeptide (Fcer1a). mRNA	0.25	-20.36	0.0071
XM_036165165.1	4694	Kdm2b	lysine (K)-specific demethylase 2B (Kdm2b). transcript variant X9. mRNA	0.02	104.87	0.0071
XM_030252098.1	1831	Zfyve19	zinc finger. FYVE domain containing 19 (Zfyve19). transcript variant X5. mRNA	0.05	74.29	0.0071
XM_036163096.1	2876	Phc3	polyhomeotic 3 (Phc3). transcript variant X6. mRNA	0.02	81.77	0.0072
XM_006506824.4	2555	Mtmr14	myotubularin related protein 14 (Mtmr14). transcript variant X1. mRNA	0.32	78.41	0.0072
NM_001252505.1	4177	St6gal1	beta galactoside alpha 2.6 sialyltransferase 1 (St6gal1). transcript variant 2. mRNA	1.8	-7.51	0.0072
NM_019655.3	5850	Adar	adenosine deaminase. RNA-specific (Adar). transcript variant 1. mRNA	2.96	2.4	0.0072
NM_001162938.2	3003	Ifi208	interferon activated gene 208 (Ifi208). transcript variant 1. mRNA	1.48	3.43	0.0072
NM_133898.4	1907	N4bp2l1	NEDD4 binding protein 2-like 1 (N4bp2l1). mRNA	1.9	-3.56	0.0073
XM_011238852.3	2664	Ifi213	interferon activated gene 213 (Ifi213). transcript variant X3. mRNA	0.03	92.98	0.0073
XM_036159801.1	5988	Ubn1	ubinuclein 1 (Ubn1). transcript variant X5. mRNA	0.02	90.63	0.0073
NM_145526.2	4190	P2rx3	purinergic receptor P2X. ligand-gated ion channel. 3 (P2rx3). mRNA	0.09	70.76	0.0073
NM_001355392.1	2769	Ndrg3	N-myc downstream regulated gene 3 (Ndrg3). transcript variant 4. mRNA	0.03	91.91	0.0073
NM_008147.2	1482	Lilr4b	leukocyte immunoglobulin-like receptor. subfamily B. member 4B (Lilr4b). transcript variant 1. mRNA	17.38	4.45	0.0073
XM_006515738.3	2873	Dglucy	D-glutamate cyclase (Dglucy). transcript variant X2. mRNA	0.08	-81.22	0.0073
XM_030242973.2	5884	Arap1	ArfGAP with RhoGAP domain. ankyrin repeat and PH domain 1 (Arap1). transcript variant X5. mRNA	0.31	23.67	0.0073
NM_001081192.3	6581	Hcn4	hyperpolarization-activated. cyclic nucleotide-gated K+ 4 (Hcn4). mRNA	0.01	64.35	0.0073
XM_006535621.3	2768	Cd36	CD36 molecule (Cd36). transcript variant X1. mRNA	1.35	-9.79	0.0073
NM_001159555.1	3539	Cd36	CD36 molecule (Cd36). transcript variant 3. mRNA	0.1	-31.26	0.0073
XR_868665.4	6007	Gm38733	predicted gene. 38733 (Gm38733). ncRNA	1.06	4.29	0.0073
NR_149739.1	4735	Mms22l	MMS22-like. DNA repair protein (Mms22l). transcript variant 2. non-coding RNA	0.06	77.97	0.0073
XM_006541458.5	4263	Zfp280c	zinc finger protein 280C (Zfp280c). transcript variant X3. mRNA	0.06	-85.43	0.0073
NM_008158.2	2712	Gpr27	G protein-coupled receptor 27 (Gpr27). mRNA	0.14	10.48	0.0073
XM_011250976.4	6401	Xiap	X-linked inhibitor of apoptosis (Xiap). transcript variant X1. mRNA	0.04	88.24	0.0074
NM_001204252.1	1501	Clec10a	C-type lectin domain family 10. member A (Clec10a). transcript variant 1. mRNA	0.47	-15.95	0.0074
XM_006519456.5	1094	Slc25a30	solute carrier family 25. member 30 (Slc25a30). transcript variant X2. mRNA	0.28	71.11	0.0074
XM_006533653.4	847	Cd300ld3	CD300 molecule like family member D3 (Cd300ld3). transcript variant X1. mRNA	3.21	-5.6	0.0074
NM_001360801.1	1143	Il1r2	interleukin 1 receptor. type II (Il1r2). transcript variant 3. mRNA	1.28	15.49	0.0074
XM_006515254.5	7178	Kidins220	kinase D-interacting substrate 220 (Kidins220). transcript variant X8. mRNA	0.02	102.6	0.0074
NM_144902.4	5356	Slc35a3	solute carrier family 35 (UDP-N-acetylglucosamine (UDP-GlcNAc) transporter). member 3 (Slc35a3). transcript variant 1. mRNA	0.01	91.21	0.0074
XM_006514090.4	5023	Cpm	carboxypeptidase M (Cpm). transcript variant X2. mRNA	0.04	69.45	0.0074
NM_029415.2	2124	Slc10a6	solute carrier family 10 (sodium/bile acid cotransporter family). member 6 (Slc10a6). mRNA	0.03	26.67	0.0074
XM_006503764.3	1714	Lyar	Ly1 antibody reactive clone (Lyar). transcript variant X5. mRNA	0.21	78.42	0.0074
XM_006505820.5	2122	St3gal5	ST3 beta-galactoside alpha-2.3-sialyltransferase 5 (St3gal5). transcript variant X6. mRNA	0.04	90.3	0.0074
XM_030247753.2	5387	Tmem260	transmembrane protein 260 (Tmem260). transcript variant X3. mRNA	0.06	-94.81	0.0074
XM_036153880.1	6269	Wrn	Werner syndrome RecQ like helicase (Wrn). transcript variant X4. mRNA	0.1	34.13	0.0074
NM_001200002.1	6872	Tmppe	transmembrane protein with metallophosphoesterase domain (Tmppe). mRNA	0.64	-3.24	0.0074
XR_003956184.2	4169	Tia1	cytotoxic granule-associated RNA binding protein 1 (Tia1). transcript variant X13. misc_RNA	0.03	43.84	0.0074
NM_001013817.2	2417	Sp140	Sp140 nuclear body protein (Sp140). mRNA	4.19	2.63	0.0074
XM_030242635.1	2125	Ptdss2	phosphatidylserine synthase 2 (Ptdss2). transcript variant X7. mRNA	0.11	88.56	0.0075
NM_001347361.1	2180	Pex3	peroxisomal biogenesis factor 3 (Pex3). transcript variant 3. mRNA	0.03	72.47	0.0075
XM_011242678.4	5268	Slc25a36	solute carrier family 25. member 36 (Slc25a36). transcript variant X2. mRNA	0.07	-101.44	0.0075
NM_001174170.1	1988	Serpinb2	serine (or cysteine) peptidase inhibitor. clade B. member 2 (Serpinb2). transcript variant 2. mRNA	0.68	21.29	0.0075
NM_008598.3	844	Mgmt	O-6-methylguanine-DNA methyltransferase (Mgmt). transcript variant 1. mRNA	0.36	-13.42	0.0075
XR_003950864.1	10797	Ercc6	excision repair cross-complementing rodent repair deficiency. complementation group 6 (Ercc6). transcript variant X9. misc_RNA	0.03	78.28	0.0076
XM_006531166.1	6870	Nlrc5	NLR family. CARD domain containing 5 (Nlrc5). transcript variant X5. mRNA	0.86	4.46	0.0076
XM_036161448.1	2073	Ifit3	interferon-induced protein with tetratricopeptide repeats 3 (Ifit3). transcript variant X3. mRNA	0.57	12.68	0.0076
NM_026174.3	3084	Entpd4	ectonucleoside triphosphate diphosphohydrolase 4 (Entpd4). transcript variant 1. mRNA	0.1	-101.37	0.0076
NM_001347640.1	4401	Tial1	Tia1 cytotoxic granule-associated RNA binding protein-like 1 (Tial1). transcript variant 2. mRNA	0.09	-22.89	0.0076
XM_006534785.5	2889	Evi5	ecotropic viral integration site 5 (Evi5). transcript variant X9. mRNA	0.02	31.98	0.0076
NM_001359577.1	3427	Kctd3	potassium channel tetramerisation domain containing 3 (Kctd3). transcript variant 3. mRNA	0.06	89.45	0.0076
XM_036158217.1	1440	Stard3nl	STARD3 N-terminal like (Stard3nl). transcript variant X4. mRNA	0.04	79.25	0.0076
XM_006499906.4	6426	Slc23a2	solute carrier family 23 (nucleobase transporters). member 2 (Slc23a2). transcript variant X1. mRNA	0.04	85.99	0.0076
NM_029036.4	4363	S100pbp	S100P binding protein (S100pbp). transcript variant 1. mRNA	0.05	-80.45	0.0076
XM_006501122.3	4357	Nras	neuroblastoma ras oncogene (Nras). transcript variant X5. mRNA	0.02	99.53	0.0077
NM_001033632.1	541	Ifitm6	interferon induced transmembrane protein 6 (Ifitm6). mRNA	15.72	2.92	0.0077
XR_004942937.1	3896	Tulp3	tubby-like protein 3 (Tulp3). transcript variant X4. misc_RNA	0.02	101.05	0.0077
NM_175383.2	2035	B4gat1	beta-1.4-glucuronyltransferase 1 (B4gat1). mRNA	0.41	-6.43	0.0077
XM_036159386.1	3552	Nr4a2	nuclear receptor subfamily 4. group A. member 2 (Nr4a2). transcript variant X3. mRNA	0.25	78.48	0.0077
XM_006507074.5	2641	Sinhcaf	SIN3-HDAC complex associated factor (Sinhcaf). transcript variant X1. mRNA	0.11	-90.94	0.0077
XM_006510582.5	5280	Anln	anillin. actin binding protein (Anln). transcript variant X2. mRNA	0.03	76.4	0.0077
NR_168885.1	3342	Gm41235	predicted gene. 41235 (Gm41235). long non-coding RNA	0.99	5.76	0.0077
NM_145227.3	3873	Oas2	2'-5' oligoadenylate synthetase 2 (Oas2). transcript variant 2. mRNA	0.88	6.26	0.0077
XM_006504904.2	7368	Pds5b	PDS5 cohesin associated factor B (Pds5b). transcript variant X3. mRNA	0.09	81.35	0.0077
NM_027619.4	7692	Ttc14	tetratricopeptide repeat domain 14 (Ttc14). transcript variant 1. mRNA	0.01	88.86	0.0077
NR_151677.1	3712	Slc7a6	solute carrier family 7 (cationic amino acid transporter. y+ system). member 6 (Slc7a6). transcript variant 3. non-coding RNA	0.03	87.33	0.0077
XM_030255470.1	4152	Tnpo3	transportin 3 (Tnpo3). transcript variant X6. mRNA	0.08	-90.8	0.0077
XR_001783643.3	4294	Arnt	aryl hydrocarbon receptor nuclear translocator (Arnt). transcript variant X5. misc_RNA	0.08	85.27	0.0077
XM_036166200.1	11467	Mkln1	muskelin 1. intracellular mediator containing kelch motifs (Mkln1). transcript variant X1. mRNA	0.03	-101.06	0.0077
NM_030253.3	3564	Parp9	poly (ADP-ribose) polymerase family. member 9 (Parp9). mRNA	1.09	3.74	0.0077
XM_036153494.1	3576	Xpo6	exportin 6 (Xpo6). transcript variant X5. mRNA	0.05	36.06	0.0077
NM_148917.3	2977	Pabpc4	poly(A) binding protein. cytoplasmic 4 (Pabpc4). transcript variant 2. mRNA	1.48	3.89	0.0077
NM_001363363.1	1719	Jmjd6	jumonji domain containing 6 (Jmjd6). transcript variant 1. mRNA	0.15	-84.41	0.0077
XM_017313907.3	4752	Zfc3h1	zinc finger. C3H1-type containing (Zfc3h1). transcript variant X7. mRNA	0.26	-12.75	0.0078
NM_001359740.1	7712	Dnajc13	DnaJ heat shock protein family (Hsp40) member C13 (Dnajc13). transcript variant 1. mRNA	0.01	87.63	0.0078
XM_030243475.2	3424	Gatad2a	GATA zinc finger domain containing 2A (Gatad2a). transcript variant X34. mRNA	0.06	71.2	0.0078
XR_004935619.1	4078	Ice2	interactor of little elongation complex ELL subunit 2 (Ice2). transcript variant X7. misc_RNA	0.18	80.38	0.0078
NM_031192.3	1423	Ren1	renin 1 structural (Ren1). mRNA	1.08	11.14	0.0079
XM_017320551.3	5488	Tor1aip2	torsin A interacting protein 2 (Tor1aip2). transcript variant X1. mRNA	0.71	5.25	0.0079
XM_036164918.1	4639	Pxn	paxillin (Pxn). transcript variant X5. mRNA	0.01	87.19	0.0079
NM_009672.3	2105	Anp32a	acidic (leucine-rich) nuclear phosphoprotein 32 family. member A (Anp32a). mRNA	8.77	-2.35	0.0079
NM_001362700.1	6572	Slc12a6	solute carrier family 12. member 6 (Slc12a6). transcript variant 3. mRNA	3.07	-3.16	0.0079
XR_004940953.1	847	LOC118568520	uncharacterized LOC118568520 (LOC118568520). ncRNA	0.52	13.72	0.0079
XM_030244123.2	4642	Pafah1b2	platelet-activating factor acetylhydrolase. isoform 1b. subunit 2 (Pafah1b2). transcript variant X1. mRNA	0.04	87.45	0.0079
XR_003955943.1	3036	Gm46916	predicted gene. 46916 (Gm46916). transcript variant X1. ncRNA	0.1	-89.16	0.0079
XM_036160628.1	5447	Brpf3	bromodomain and PHD finger containing. 3 (Brpf3). transcript variant X6. mRNA	0.01	98.67	0.0079
XM_011250518.4	3674	Atp1a3	ATPase. Na+/K+ transporting. alpha 3 polypeptide (Atp1a3). transcript variant X1. mRNA	0.08	-82.12	0.0079
XM_030254113.2	12931	Cux1	cut-like homeobox 1 (Cux1). transcript variant X12. mRNA	0	78.18	0.0079
NR_125870.1	5788	Xiap	X-linked inhibitor of apoptosis (Xiap). transcript variant 4. non-coding RNA	0.07	85.17	0.0079
NM_001293639.1	5344	Nek1	NIMA (never in mitosis gene a)-related expressed kinase 1 (Nek1). transcript variant 4. mRNA	0.03	68.28	0.0079
NM_173743.4	1509	Apol9b	apolipoprotein L 9b (Apol9b). transcript variant 2. mRNA	0.06	13.77	0.0079
XM_017318039.3	5361	Btaf1	B-TFIID TATA-box binding protein associated factor 1 (Btaf1). transcript variant X4. mRNA	0.22	83.15	0.0079
XR_384529.5	7063	Cd47	CD47 antigen (Rh-related antigen. integrin-associated signal transducer) (Cd47). transcript variant X3. misc_RNA	0.15	25.82	0.0079
XM_006529956.5	4608	Armc9	armadillo repeat containing 9 (Armc9). transcript variant X6. mRNA	0.02	87.42	0.0079
XR_003955669.1	3639	Dnaaf5	dynein. axonemal assembly factor 5 (Dnaaf5). transcript variant X1. misc_RNA	0.07	70.38	0.008
XM_006511577.4	4906	Rnf111	ring finger 111 (Rnf111). transcript variant X3. mRNA	0.02	97.66	0.008
NM_001143848.2	4220	Pde2a	phosphodiesterase 2A. cGMP-stimulated (Pde2a). transcript variant 1. mRNA	0.04	40.64	0.008
NM_001168517.1	2316	Zdhhc24	zinc finger. DHHC domain containing 24 (Zdhhc24). transcript variant 3. mRNA	0.13	-90.14	0.008
XM_036156154.1	2165	LOC118567843	uncharacterized LOC118567843 (LOC118567843). mRNA	9.74	2.56	0.008
NM_031167.5	2464	Il1rn	interleukin 1 receptor antagonist (Il1rn). transcript variant 1. mRNA	0.03	79.25	0.008
NM_172502.4	2350	Dcaf15	DDB1 and CUL4 associated factor 15 (Dcaf15). transcript variant 1. mRNA	0.02	78.4	0.008
NM_023377.4	2500	Stard5	StAR-related lipid transfer (START) domain containing 5 (Stard5). mRNA	1.27	-3.58	0.008
NM_001282108.1	3518	Slc10a7	solute carrier family 10 (sodium/bile acid cotransporter family). member 7 (Slc10a7). transcript variant d. mRNA	0.02	86.55	0.008
NM_145375.4	2234	Tm6sf1	transmembrane 6 superfamily member 1 (Tm6sf1). transcript variant 1. mRNA	0.95	-7.31	0.008
XM_006502101.5	8335	Alpk1	alpha-kinase 1 (Alpk1). transcript variant X1. mRNA	0.02	36.73	0.008
XM_036165663.1	4128	Zbtb18	zinc finger and BTB domain containing 18 (Zbtb18). transcript variant X4. mRNA	0.02	77.36	0.008
NM_001357236.1	2903	Anapc10	anaphase promoting complex subunit 10 (Anapc10). transcript variant 4. mRNA	0.08	-79.03	0.008
XM_036162641.1	3694	Ttll11	tubulin tyrosine ligase-like family. member 11 (Ttll11). transcript variant X1. mRNA	0.02	78.15	0.008
NM_001304992.1	1932	Ppp3cc	protein phosphatase 3. catalytic subunit. gamma isoform (Ppp3cc). transcript variant 3. mRNA	0.1	-77.13	0.008
XR_004936923.1	1746	Nle1	notchless homolog 1 (Nle1). transcript variant X6. misc_RNA	0.04	71.27	0.008
XM_006531516.4	6847	N4bp1	NEDD4 binding protein 1 (N4bp1). transcript variant X1. mRNA	0.18	18.5	0.008
NM_029888.3	6192	Zfp142	zinc finger protein 142 (Zfp142). transcript variant 2. mRNA	0.05	-100.97	0.008
XM_036157014.1	5902	Rps6kb1	ribosomal protein S6 kinase. polypeptide 1 (Rps6kb1). transcript variant X5. mRNA	0.15	-12.17	0.008
XM_036159287.1	5697	St3gal1	ST3 beta-galactoside alpha-2.3-sialyltransferase 1 (St3gal1). transcript variant X5. mRNA	0.02	85.55	0.008
XR_004934787.1	2500	Stxbp2	syntaxin binding protein 2 (Stxbp2). transcript variant X8. misc_RNA	0.47	82.51	0.008
XM_017315258.2	6066	Pum2	pumilio RNA-binding family member 2 (Pum2). transcript variant X18. mRNA	0.15	-14.64	0.008
NM_030188.3	2862	Ttc30a1	tetratricopeptide repeat domain 30A1 (Ttc30a1). mRNA	0.22	-8.52	0.0081
NM_001357032.1	2756	Gtpbp10	GTP-binding protein 10 (putative) (Gtpbp10). transcript variant 3. mRNA	0.02	76.84	0.0081
XM_006532704.3	6704	Tspoap1	TSPO associated protein 1 (Tspoap1). transcript variant X3. mRNA	0.17	82.13	0.0081
XM_006540742.5	5299	Zfp710	zinc finger protein 710 (Zfp710). transcript variant X1. mRNA	0.3	-9.62	0.0081
XM_011242421.3	4045	Abcg4	ATP binding cassette subfamily G member 4 (Abcg4). transcript variant X1. mRNA	0.03	68.51	0.0081
XM_030249346.2	4026	Med15	mediator complex subunit 15 (Med15). transcript variant X1. mRNA	0.03	30.62	0.0081
XM_017317579.3	2696	Btnl2	butyrophilin-like 2 (Btnl2). transcript variant X1. mRNA	0.13	-14.48	0.0081
XM_030255214.2	4992	Mitf	melanogenesis associated transcription factor (Mitf). transcript variant X12. mRNA	0.02	85.76	0.0081
NM_028071.3	1642	Cotl1	coactosin-like 1 (Dictyostelium) (Cotl1). mRNA	23.5	-2.48	0.0081
NM_001271019.1	2427	Siglecf	sialic acid binding Ig-like lectin F (Siglecf). transcript variant 2. mRNA	0.03	69.28	0.0081
NM_153807.2	3069	Acsf2	acyl-CoA synthetase family member 2 (Acsf2). mRNA; nuclear gene for mitochondrial product	1.59	-3.8	0.0081
NM_172508.3	3920	Dse	dermatan sulfate epimerase (Dse). mRNA	0.5	-9.79	0.0081
NM_001355705.1	4225	Rfx5	regulatory factor X. 5 (influences HLA class II expression) (Rfx5). transcript variant 2. mRNA	0.04	86.05	0.0081
NM_001378935.1	3535	Zfp346	zinc finger protein 346 (Zfp346). transcript variant 3. mRNA	0.04	32.68	0.0082
XM_006521020.4	2913	Racgap1	Rac GTPase-activating protein 1 (Racgap1). transcript variant X6. mRNA	0.03	97.23	0.0082
XM_030248623.1	20278	Kmt2d	lysine (K)-specific methyltransferase 2D (Kmt2d). transcript variant X7. mRNA	0	97.23	0.0082
XM_036165483.1	3350	Exoc1	exocyst complex component 1 (Exoc1). transcript variant X6. mRNA	0.17	80.68	0.0082
XM_036162931.1	3000	Phtf1	putative homeodomain transcription factor 1 (Phtf1). transcript variant X4. mRNA	0.05	74.41	0.0082
NR_152560.1	2366	Irf2	interferon regulatory factor 2 (Irf2). transcript variant 2. non-coding RNA	0.21	-14.63	0.0082
XM_006512000.5	5055	Snrk	SNF related kinase (Snrk). transcript variant X2. mRNA	0.06	-87.35	0.0082
NM_007642.4	4317	Cd28	CD28 antigen (Cd28). mRNA	2.06	-2.59	0.0082
XM_030243349.2	6018	Nrp1	neuropilin 1 (Nrp1). transcript variant X2. mRNA	0.05	-96.91	0.0082
XM_017315926.2	4115	Ptk2b	PTK2 protein tyrosine kinase 2 beta (Ptk2b). transcript variant X1. mRNA	0.02	95.4	0.0082
XM_017321113.2	9044	Pan3	PAN3 poly(A) specific ribonuclease subunit (Pan3). transcript variant X6. mRNA	0.01	95.4	0.0082
NR_003507.1	1848	Oas1b	2'-5' oligoadenylate synthetase 1B (Oas1b). transcript variant 1. non-coding. non-coding RNA	2.31	3.43	0.0082
XM_006516840.5	8933	Hivep1	human immunodeficiency virus type I enhancer binding protein 1 (Hivep1). transcript variant X2. mRNA	0.03	84.12	0.0082
XM_036153008.1	7732	Tnrc6a	trinucleotide repeat containing 6a (Tnrc6a). transcript variant X12. mRNA	0.08	-21.67	0.0082
NM_001310711.1	3361	Ptbp2	polypyrimidine tract binding protein 2 (Ptbp2). transcript variant 2. mRNA	0.09	-30.01	0.0082
NM_001173553.2	4364	Cdc14a	CDC14 cell division cycle 14A (Cdc14a). transcript variant 2. mRNA	0.02	85.38	0.0082
XM_006523672.3	2540	Cfb	complement factor B (Cfb). transcript variant X2. mRNA	0.07	74.88	0.0082
NM_027395.2	1855	Basp1	brain abundant. membrane attached signal protein 1 (Basp1). mRNA	1.24	4.54	0.0082
XM_036156621.1	5037	Tex2	testis expressed gene 2 (Tex2). transcript variant X4. mRNA	0.07	82.56	0.0083
XM_030243621.2	6787	Pkn1	protein kinase N1 (Pkn1). transcript variant X1. mRNA	2.46	-3.91	0.0083
XM_030244135.2	1198	Pts	6-pyruvoyl-tetrahydropterin synthase (Pts). transcript variant X8. mRNA	0.06	62.37	0.0083
NM_001159418.1	2343	Irf9	interferon regulatory factor 9 (Irf9). transcript variant 2. mRNA	4.55	3.32	0.0083
XM_006526028.5	5446	Arhgef37	Rho guanine nucleotide exchange factor (GEF) 37 (Arhgef37). transcript variant X2. mRNA	0.14	-15.65	0.0083
NM_001353141.1	5992	Myo10	myosin X (Myo10). transcript variant 2. mRNA	0.01	77.38	0.0083
XM_030253848.2	8000	Hnrnpr	heterogeneous nuclear ribonucleoprotein R (Hnrnpr). transcript variant X7. mRNA	0.13	77.03	0.0083
XM_036158668.1	8488	Ercc6	excision repair cross-complementing rodent repair deficiency. complementation group 6 (Ercc6). transcript variant X7. mRNA	0.04	-99.8	0.0083
XM_036160098.1	3342	Tbc1d23	TBC1 domain family. member 23 (Tbc1d23). transcript variant X6. mRNA	0.02	94.31	0.0083
XM_011239135.3	13134	Rif1	replication timing regulatory factor 1 (Rif1). transcript variant X1. mRNA	0.03	79.61	0.0084
XM_006496607.5	2890	Uap1	UDP-N-acetylglucosamine pyrophosphorylase 1 (Uap1). transcript variant X2. mRNA	0.03	73.94	0.0084
XM_011246907.4	2197	Mppe1	metallophosphoesterase 1 (Mppe1). transcript variant X1. mRNA	0.03	77.61	0.0084
NM_173874.1	5781	Clcn3	chloride channel. voltage-sensitive 3 (Clcn3). transcript variant e. mRNA	0.04	-88.32	0.0084
NM_026402.3	2013	Atg3	autophagy related 3 (Atg3). transcript variant 1. mRNA	3.78	-3.12	0.0084
XM_011248610.3	2498	Pola2	polymerase (DNA directed). alpha 2 (Pola2). transcript variant X5. mRNA	0.03	84.13	0.0084
NM_025370.3	3010	Prxl2c	peroxiredoxin like 2C (Prxl2c). mRNA	1.27	-3.44	0.0085
XR_388552.5	5300	Tbc1d9b	TBC1 domain family. member 9B (Tbc1d9b). transcript variant X4. misc_RNA	0.01	84	0.0085
NM_027307.4	3693	Golm1	golgi membrane protein 1 (Golm1). transcript variant 1. mRNA	0.13	-19.02	0.0085
NM_028065.4	1902	Cnpy3	canopy FGF signaling regulator 3 (Cnpy3). transcript variant 1. mRNA	3.96	-2.66	0.0085
NM_001290784.1	3907	Ldlrad3	low density lipoprotein receptor class A domain containing 3 (Ldlrad3). transcript variant 2. mRNA	0.08	-95.69	0.0085
NM_001362831.1	6604	Phf21a	PHD finger protein 21A (Phf21a). transcript variant 7. mRNA	0.05	-22.35	0.0085
XR_004941393.1	9144	Dclk2	doublecortin-like kinase 2 (Dclk2). transcript variant X33. misc_RNA	0.04	21.77	0.0085
XM_030244051.2	6415	Ube4a	ubiquitination factor E4A (Ube4a). transcript variant X9. mRNA	0.1	77.26	0.0085
NM_001164101.2	4353	Add3	adducin 3 (gamma) (Add3). transcript variant 4. mRNA	2	-7.06	0.0085
XM_017314411.1	1942	Gps1	G protein pathway suppressor 1 (Gps1). transcript variant X4. mRNA	0.25	79.32	0.0085
XM_006518697.4	2609	Prkcd	protein kinase C. delta (Prkcd). transcript variant X3. mRNA	0.03	83.31	0.0086
NM_008690.4	2438	Nfkbie	nuclear factor of kappa light polypeptide gene enhancer in B cells inhibitor. epsilon (Nfkbie). transcript variant 1. mRNA	9.99	2.36	0.0086
NM_001282947.1	6497	Apaf1	apoptotic peptidase activating factor 1 (Apaf1). transcript variant 3. mRNA	0.06	82.05	0.0086
NM_001281965.1	4292	Itk	IL2 inducible T cell kinase (Itk). transcript variant 1. mRNA	0.07	81	0.0086
NM_011314.3	609	Saa2	serum amyloid A 2 (Saa2). transcript variant 1. mRNA	0.1	28.14	0.0086
XM_006528051.4	7214	Taf1	TATA-box binding protein associated factor 1 (Taf1). transcript variant X4. mRNA	0.02	33.98	0.0086
XM_006516185.5	3075	Otub2	OTU domain. ubiquitin aldehyde binding 2 (Otub2). transcript variant X1. mRNA	0.02	83.61	0.0086
XM_011243440.1	5910	Ikzf4	IKAROS family zinc finger 4 (Ikzf4). transcript variant X3. mRNA	0.01	93.15	0.0086
XR_003953684.2	10449	Gm14326	predicted gene 14326 (Gm14326). transcript variant X1. misc_RNA	0.07	-10.24	0.0086
XM_006504058.3	2597	Pgm2	phosphoglucomutase 2 (Pgm2). transcript variant X2. mRNA	0.4	76.88	0.0086
XM_030251429.2	5051	Septin6	septin 6 (Septin6). transcript variant X5. mRNA	0.05	74.2	0.0086
XM_036157319.1	7933	Sipa1l1	signal-induced proliferation-associated 1 like 1 (Sipa1l1). transcript variant X18. mRNA	0.04	80.61	0.0086
XM_036154450.1	4391	Uck2	uridine-cytidine kinase 2 (Uck2). transcript variant X2. mRNA	0.03	94.19	0.0086
NM_145956.4	4335	Brcc3	BRCA1/BRCA2-containing complex. subunit 3 (Brcc3). transcript variant 2. mRNA	0.01	68.36	0.0086
NM_001286424.1	2872	Fut10	fucosyltransferase 10 (Fut10). transcript variant 4. mRNA	0.01	53.1	0.0087
NM_001101656.2	812	Cd300ld4	CD300 molecule like family member D4 (Cd300ld4). mRNA	1.54	-22.19	0.0087
XM_006509708.3	5361	Mast3	microtubule associated serine/threonine kinase 3 (Mast3). transcript variant X2. mRNA	0.09	-27.53	0.0087
NM_008534.3	2499	Ly9	lymphocyte antigen 9 (Ly9). transcript variant 1. mRNA	3.92	-2.41	0.0087
XM_036153523.1	12473	Akap13	A kinase (PRKA) anchor protein 13 (Akap13). transcript variant X4. mRNA	0.01	93.41	0.0087
XM_006502292.5	6159	Bcl9	B cell CLL/lymphoma 9 (Bcl9). transcript variant X6. mRNA	0.01	92.97	0.0087
NM_001311066.1	2170	Crem	cAMP responsive element modulator (Crem). transcript variant 17. mRNA	0.02	56.41	0.0087
XM_036152557.1	2828	Tm6sf1	transmembrane 6 superfamily member 1 (Tm6sf1). transcript variant X1. mRNA	0.08	-22.04	0.0087
XM_017314486.3	6531	Abca9	ATP-binding cassette. sub-family A (ABC1). member 9 (Abca9). transcript variant X2. mRNA	0.05	-84.79	0.0088
XM_017313271.2	5153	Slc24a1	solute carrier family 24 (sodium/potassium/calcium exchanger). member 1 (Slc24a1). transcript variant X1. mRNA	0.11	71.83	0.0088
XM_030252754.2	5777	Fam126b	family with sequence similarity 126. member B (Fam126b). transcript variant X4. mRNA	0.01	75.08	0.0088
NM_001302163.1	3927	Acsl1	acyl-CoA synthetase long-chain family member 1 (Acsl1). transcript variant 1. mRNA	0.04	71.56	0.0088
NM_001363016.1	2006	Slc35c2	solute carrier family 35. member C2 (Slc35c2). transcript variant 6. mRNA	0.56	-11.97	0.0088
NM_001142792.1	1025	Tmem150b	transmembrane protein 150B (Tmem150b). transcript variant 1. mRNA	0.18	-14.1	0.0088
XM_030252963.1	14378	Nav1	neuron navigator 1 (Nav1). transcript variant X15. mRNA	0.01	92.6	0.0088
NM_001291020.1	3845	Sirpa	signal-regulatory protein alpha (Sirpa). transcript variant 5. mRNA	1.08	-6.57	0.0088
XM_006498320.3	3733	Tbc1d13	TBC1 domain family. member 13 (Tbc1d13). transcript variant X3. mRNA	0.37	-13.67	0.0089
XM_006498221.4	7730	Tsc1	TSC complex subunit 1 (Tsc1). transcript variant X2. mRNA	0.14	78.93	0.0089
XM_011240610.3	3047	Btf3l4	basic transcription factor 3-like 4 (Btf3l4). transcript variant X1. mRNA	0.05	65.16	0.0089
XM_030243146.1	2299	Gm51464	predicted gene. 51464 (Gm51464). mRNA	11.56	9.33	0.0089
XM_036157806.1	1344	Gm21188	predicted gene. 21188 (Gm21188). transcript variant X2. mRNA	0.25	14.06	0.0089
NM_001306169.1	4240	Ccdc116	coiled-coil domain containing 116 (Ccdc116). transcript variant 3. mRNA	0.02	63.96	0.0089
XM_030242965.1	3031	Fuom	fucose mutarotase (Fuom). transcript variant X1. mRNA	0.11	63.96	0.009
NM_013632.4	2941	Pnp	purine-nucleoside phosphorylase (Pnp). mRNA	2.22	3.03	0.0091
XM_030252039.1	4360	Trp53inp2	transformation related protein 53 inducible nuclear protein 2 (Trp53inp2). transcript variant X3. mRNA	0.29	24.89	0.0091
[truncated: 128,331 more rows]
