# Supplementary material for: The infection-tolerant white-footed deermouse tempers interferon responses to endotoxin in comparison to the mouse and rat
Source: eLife. 2024 Jan 9;12:RP90135. doi: 10.7554/eLife.90135 (PMC10945503; doi:10.7554/eLife.90135)
Supplement: Figure 4—source data 1. [file elife-90135-fig4-data1.xlsx]

## Sheet: Figure 4-Source Data 1
Figure 4-Source Data 1. Differentially expressed gene analysis of 20 female and 20 male P. leucopus treated with LPS or saline (control)
transcript	length	max_cont	female/male FC_cont	FDR_cont	max_LPS	female/male FC_LPS	FDR_LPS	gene	product
XR_005090035.1	2269	66.17	142.07	7.72e-162	62.01	211.39	1.75e-57	Xist	Xist in other rodents; uncharacterized LOC119086694 (LOC119086694), ncRNA
XM_028878542.2	691	797.42	-1.09	1	573.31	-543.21	9.34e-26	Dnajc15	DnaJ heat shock protein family (Hsp40) member C15 (Dnajc15), transcript variant X2, mRNA
XM_028861626.2	2250	48.51	-1.38	1	39.11	-130.18	8.68e-21	Hspa8	heat shock cognate 71 kDa protein-like (LOC114686934), mRNA
XM_028885840.2	638	60.86	-404.24	5.04e-12	77.88	-1011.53	1.73e-18	Myl6	myosin light polypeptide 6-like (LOC114704518), mRNA
XM_028872718.2	7135	3.04	1.29	1	2.1	116.95	4.73e-13	Foxp1	forkhead box P1 (Foxp1), transcript variant X2, mRNA
XM_028862827.2	2965	28.32	-1.4	0.693	4.13	-2087.25	1.29e-11	Pkn1	protein kinase N1 (Pkn1), transcript variant X1, mRNA
XR_003736827.2	5951	27.15	2914.85	2.5e-95	24.5	28390.4	1.93e-10	Xist	Xist; uncharacterized LOC114708611 (LOC114708611), ncRNA
XM_028860520.2	2246	9.16	1.3	1	15.63	237.44	2.6e-10	St3gal5	ST3 beta-galactoside alpha-2,3-sialyltransferase 5 (St3gal5), transcript variant X2, mRNA
XM_028862665.2	10941	1.1	2	0.963	1.06	176.16	1.03e-07	Akap9	A-kinase anchoring protein 9 (Akap9), transcript variant X7, mRNA
XM_037202187.1	2790	33.73	-2.51	0.447	36.2	51.55	1.2e-06	Lilra6	leukocyte immunoglobulin-like receptor subfamily A member 6 (LOC114688828), transcript variant X5, mRNA
XM_037208902.1	7039	1	-3.95	0.497	1.15	-7801.05	1.72e-06	Psme4	proteasome activator subunit 4 (Psme4), transcript variant X4, mRNA
XM_028855543.2	2387	0.97	-648.98	0.00527	7.84	84.24	1.78e-06	Srpk2	SRSF protein kinase 2 (Srpk2), transcript variant X8, mRNA
XM_037200798.1	376	162.77	2.85	0.255	111.57	19.54	2.89e-06	LOC114709491	60S ribosomal protein L39-like (LOC114709491), mRNA
XM_037202589.1	2639	3.72	-1.01	1	3.06	-6837.27	2.89e-06	Tmod1	tropomodulin 1 (Tmod1), transcript variant X2, mRNA
XM_028881894.2	1065	0.23	-7.31	0.491	155.43	-39.19	3.32e-06	Cxcl1	chemokine (C-X-C motif) ligand 1; growth-regulated alpha protein (LOC114701736), mRNA
XM_028876722.2	3836	3.09	-422.91	4.68e-20	2.32	-3014.65	3.39e-06	Ddx3y	putative ATP-dependent RNA helicase Pl10 (LOC114698204); Ddx3y, mRNA
XM_037203707.1	2370	3.56	-3.69	0.367	3.55	68.98	3.39e-06	LOC114700136	GTPase IMAP family member 3-like (LOC114700136), transcript variant X1, mRNA
XM_037202286.1	507	98.22	-69.43	3.52e-06	35.64	-135.45	3.77e-06	Rps25	40S ribosomal protein S25 (LOC114710221), mRNA
XM_028857925.2	3348	0.82	914.54	0.00734	1.77	-3582.78	3.77e-06	Ganab	glucosidase II alpha subunit (Ganab), transcript variant X3, mRNA
XM_028888287.2	8131	0.47	1.61	1	1.22	160.27	7.29e-06	Btbd7	BTB domain containing 7 (Btbd7), transcript variant X2, mRNA
XM_028869470.2	2936	2.07	1.05	1	2	-183	7.5e-06	Fgf11	fibroblast growth factor 11 (Fgf11), transcript variant X2, mRNA
XM_028873994.2	4688	1.57	-1.61	0.992	1.67	57.63	7.85e-06	Pja2	praja ring finger ubiquitin ligase 2 (Pja2), transcript variant X1, mRNA
XM_028879060.2	2849	1.67	1239.89	0.00268	12.64	8463.3	1.05e-05	LOC114699775	TIR domain containing adaptor protein (LOC114699775), transcript variant X1, mRNA
XM_028888516.2	5240	1.1	-1.68	0.981	1.22	660.67	1.05e-05	L1cam	L1 cell adhesion molecule (L1cam), transcript variant X3, mRNA
XM_037210753.1	1777	10.73	1.83	0.953	9.02	-116.58	1.18e-05	LOC114697695	SNW domain-containing protein 1 (LOC114697695), mRNA
XM_028888736.2	3475	0.03	-2.67	NaN	28.79	-32.43	1.65e-05	Slc13a5	solute carrier family 13 member 5 (Slc13a5), mRNA
XM_028866044.2	3508	0.1	1.64	1	18.7	16.66	3.12e-05	Pxylp1	2-phosphoxylose phosphatase 1 (Pxylp1), transcript variant X7, mRNA
XM_028856225.2	510	66.56	-2.41	0.627	25.84	-40.96	3.73e-05	LOC114682374	60S ribosomal protein L23-like (LOC114682374), mRNA
XM_028868676.2	1514	15.82	2.88	0.517	11.53	24.65	4.08e-05	Eif4a1	eukaryotic initiation factor 4A-I (LOC114692750), mRNA
XM_028873154.2	4886	1.26	1.72	1	1.96	224.61	4.19e-05	Wac	WW domain containing adaptor with coiled-coil (Wac), transcript variant X3, mRNA
XM_028890516.2	9174	1.52	51.96	8.19e-10	1.44	-53.13	4.27e-05	Acaca	acetyl-CoA carboxylase alpha (Acaca), transcript variant X3, mRNA
XM_028863737.1	3808	0.06	-1.26	1	1.71	131.79	5.03e-05	Unc5a	unc-5 netrin receptor A (Unc5a), transcript variant X3, mRNA
XM_028891607.2	1991	5.76	1.04	1	299.2	-29.04	5.45e-05	Serpinb2	serpin family B member 2 (Serpinb2), transcript variant X1, mRNA
XM_037202231.1	1838	8.71	-1.55	0.665	4.29	45.49	6.76e-05	Myadm	myeloid associated differentiation marker (Myadm), transcript variant X2, mRNA
XR_005090809.1	3668	0.3	315.1	0.0355	0.57	-365.67	7.36e-05	Map3k7	mitogen-activated protein kinase kinase kinase 7 (Map3k7), transcript variant X2, misc_RNA
XM_037208021.1	4249	0.14	-1.92	1	0.5	-984.59	7.36e-05	Ctdspl	CTD small phosphatase like (Ctdspl), transcript variant X2, mRNA
XM_037206216.1	4002	2.1	3.65	0.167	1.41	428.17	8.04e-05	Ripor1	RHO family interacting cell polarization regulator 1 (Ripor1), transcript variant X5, mRNA
XR_003735476.2	98	106.54	2.94	0.2	589.09	-12.28	8.04e-05	LOC114699149	uncharacterized LOC114699149 (LOC114699149), transcript variant X1, ncRNA
XM_028887202.2	1658	0.22	1.04	1	9.95	-70.57	8.04e-05	Ccnd3	cyclin D3 (Ccnd3), transcript variant X5, mRNA
XM_028874115.2	3257	1.73	-1.43	1	0.79	-262.45	8.15e-05	Zfp512	zinc finger protein 512 (LOC114696415), transcript variant X3, mRNA
XM_028884283.2	3085	0.7	-1.2	1	21.07	-20.5	8.37e-05	Fads2	fatty acid desaturase 2 (Fads2), mRNA
XM_028869785.2	5065	1.8	-1819.69	0.00157	5.94	7213.79	8.82e-05	Samd9	sterile alpha motif domain containing 9 (Samd9), transcript variant X2, mRNA
XM_037208482.1	7226	2.1	1.64	0.43	0.66	193.56	9.31e-05	Spata13	spermatogenesis associated 13 (Spata13), transcript variant X4, mRNA
XM_028854795.2	5232	0.17	1.45	1	1.65	-4038.12	9.31e-05	Git2	GIT ArfGAP 2 (Git2), transcript variant X3, mRNA
XM_028880013.2	7546	0.65	-1.48	1	0.75	-4442.99	9.31e-05	Rapgef6	Rap guanine nucleotide exchange factor 6 (Rapgef6), transcript variant X16, mRNA
XM_037201743.1	3798	8.34	-2.41	0.0833	161.69	-20.7	0.000104	Cd163	scavenger receptor cysteine-rich type 1 protein M130-like (LOC114688009), mRNA
XM_028861560.2	1856	6.56	-1.04	1	11.71	60.68	0.00011	LOC119086094	tripartite motif-containing protein 30A-like (LOC119086094), transcript variant X2, mRNA
XM_037204574.1	10418	5.77	-1.16	1	2.52	-3358.46	0.00011	Prrc2b	proline rich coiled-coil 2B (Prrc2b), transcript variant X5, mRNA
XM_037211099.1	1755	0.91	568.41	0.00772	1.23	-1814.59	0.000116	Cast	calpastatin (Cast), transcript variant X11, mRNA
XM_028893113.2	4059	0.72	-1.04	1	2.07	506.23	0.000116	Glb1l	galactosidase beta 1 like (Glb1l), transcript variant X3, mRNA
XM_028886392.2	3931	38.29	-1.35	0.736	38.76	7.66	0.000117	Tlr13	toll-like receptor 13 (LOC114704885), mRNA
XM_037202184.1	3379	28.92	-1.84	0.359	13.53	7981.47	0.000127	Lilra6	leukocyte immunoglobulin-like receptor subfamily A member 6 (LOC114688828), transcript variant X1, mRNA
XM_028865398.2	7583	1	-1.51	1	0.33	-1398.46	0.00015	Phf3	PHD finger protein 3 (Phf3), transcript variant X4, mRNA
XM_037207053.1	2764	0.25	-1.2	1	1.48	-42.41	0.00015	LOC114686218	heat shock protein HSP 90-alpha-like (LOC114686218), mRNA
XM_028873448.2	6296	0.75	-1.01	1	26.9	-25.19	0.000155	Ltbp1	latent transforming growth factor beta binding protein 1 (Ltbp1), mRNA
XM_028885679.2	4301	0.19	-4.96	0.779	1.38	-1673.39	0.00016	Sec23ip	SEC23 interacting protein (LOC114704419), transcript variant X1, mRNA
XM_028889385.2	3811	1.65	1.86	1	0.93	-96.87	0.00016	Ccnj	cyclin J (Ccnj), transcript variant X1, mRNA
XM_028891865.2	5419	0.55	-1.35	1	1.21	299.04	0.00016	Adcy6	adenylate cyclase 6 (Adcy6), transcript variant X2, mRNA
XM_037204659.1	3672	2.15	1.11	1	1.44	135.52	0.000182	Cpsf7	cleavage and polyadenylation specific factor 7 (Cpsf7), transcript variant X4, mRNA
XM_037201050.1	1817	31.58	548.2	2.28e-16	11.03	5066.77	0.000188	Btnl10	butyrophilin like 10 (Btnl10), transcript variant X5, mRNA
XM_037201269.1	829	5.17	-1.73	1	2.43	-362.3	0.000188	LOC114683018	regulator of G-protein signaling 18-like (LOC114683018), mRNA
XM_028868586.2	5798	4.33	1.74	0.933	3.7	4060.39	0.000196	LOC114692674	activity dependent neuroprotector homeobox (LOC114692674), transcript variant X3, mRNA
XM_037207456.1	2225	0	NaN	NaN	2.38	-2112.01	0.000199	Pkm	pyruvate kinase M1/2 (Pkm), transcript variant X3, mRNA
XM_028867084.2	4988	0.69	-2.38	0.873	1.1	44.7	0.000199	Ammecr1l	AMMECR1 like (Ammecr1l), transcript variant X1, mRNA
XM_037204621.1	5492	1.11	-1.03	1	1.41	1504.53	0.000207	Setx	senataxin (Setx), transcript variant X5, mRNA
XM_028856275.2	1881	28.12	-1.93	0.152	178.12	-11.02	0.000212	Ecm1	extracellular matrix protein 1 (Ecm1), transcript variant X2, mRNA
XM_028881874.2	1614	0.19	-1.54	1	6.7	-19.45	0.000231	Cxcl5	C-X-C motif chemokine 5 (LOC114701716), mRNA
XM_037198642.1	2678	0	NaN	NaN	0.79	-1275.92	0.000239	Taok3	TAO kinase 3 (Taok3), transcript variant X5, mRNA
XM_028871636.2	5901	0.6	-1.36	1	1.99	-81.5	0.00024	Kmt5b	lysine methyltransferase 5B (Kmt5b), transcript variant X1, mRNA
XM_037210417.1	3264	9.36	2.1	0.323	15.87	5.13	0.000249	Itgal	integrin subunit alpha L (Itgal), transcript variant X3, mRNA
XM_037206084.1	3623	0.07	1.05	1	2.02	-185.31	0.000249	Lpcat2	lysophosphatidylcholine acyltransferase 2 (Lpcat2), transcript variant X1, mRNA
XM_028864183.2	1215	0.31	-3.03	0.893	90.83	-17.1	0.000262	Il6	interleukin 6 (Il6), mRNA
XM_037202185.1	3463	8.45	1.03	1	2.39	315.31	0.000264	Lilra6	leukocyte immunoglobulin-like receptor subfamily A member 6 (LOC114688828), transcript variant X2, mRNA
XM_028872422.2	6119	3.59	-1.01	1	15.46	6.55	0.000265	Col5a3	collagen type V alpha 3 chain (Col5a3), mRNA
XM_037206732.1	1794	4.44	-1.81	1	4.59	-3123.03	0.000265	Fcrl2	Fc receptor-like protein 2 (LOC114685824), transcript variant X4, mRNA
XM_037200138.1	6209	2.77	1281.68	2.07e-10	5.26	4928.21	0.000269	Ogfrl1	opioid growth factor receptor like 1 (Ogfrl1), transcript variant X1, mRNA
XM_028878099.2	3804	1.19	-1.64	1	0.89	153.91	0.000285	N4bp2l2	NEDD4 binding protein 2 like 2 (N4bp2l2), transcript variant X1, mRNA
XM_028856274.2	1883	33.62	-2.03	0.058	254.79	-11.71	0.0003	Ecm1	extracellular matrix protein 1 (Ecm1), transcript variant X1, mRNA
XM_028861694.2	3108	0.05	1.57	1	1.76	20.19	0.000331	Il20ra	interleukin 20 receptor subunit alpha (Il20ra), transcript variant X2, mRNA
XM_037202357.1	2290	0.98	1	1	1.53	146.3	0.000333	Snx16	sorting nexin 16 (Snx16), transcript variant X2, mRNA
XM_028889513.2	4990	0.91	-2.42	0.997	1.33	509.7	0.0004	Fbxl20	F-box and leucine rich repeat protein 20 (Fbxl20), transcript variant X3, mRNA
XM_028881998.2	2884	0.58	1.15	1	0.79	-178.19	0.0004	Ppig	peptidylprolyl isomerase G (Ppig), transcript variant X4, mRNA
XM_037202628.1	8068	0.54	-1.37	1	0.41	-2133.42	0.000444	Ecpas	Ecm29 proteasome adaptor and scaffold (Ecpas), transcript variant X6, mRNA
XM_028892703.2	1647	3.03	-3.01	1	4.64	-55.46	0.000461	Galk2	galactokinase 2 (Galk2), transcript variant X2, mRNA
XM_037202044.1	3216	5.92	1.21	1	3.26	23.19	0.000474	Cd22	CD22 molecule (Cd22), transcript variant X3, mRNA
XM_037206858.1	15304	0.35	9.07	0.13	0.41	70.81	0.000475	Lcor	ligand dependent nuclear receptor corepressor (Lcor), transcript variant X7, mRNA
XM_037203965.1	4184	0.93	2.26	0.904	0.72	98.59	0.000525	Caprin2	caprin family member 2 (Caprin2), transcript variant X3, mRNA
XM_037196873.1	4671	1.48	-1.26	1	1.45	1316.95	0.000525	Slc41a2	solute carrier family 41 member 2 (Slc41a2), transcript variant X4, mRNA
XR_005091408.1	1572	0	NaN	NaN	2.11	-581.66	0.000525	Rassf2	Ras association domain family member 2 (Rassf2), transcript variant X1, misc_RNA
XM_037207865.1	1139	4.47	-122.09	3.23e-05	2.82	-68.6	0.000546	LOC114693581	coxsackievirus and adenovirus receptor homolog (LOC114693581), transcript variant X5, mRNA
XM_037197951.1	2462	0.72	-241.93	0.00797	5.93	22.69	0.000546	Pram1	PML-RARA regulated adaptor molecule 1 (Pram1), transcript variant X1, mRNA
XM_028890027.2	4030	0.38	-125.58	0.0153	2.61	2174.28	0.000546	Ptk2b	protein tyrosine kinase 2 beta (Ptk2b), transcript variant X1, mRNA
XM_028871672.2	1782	13.15	-1.87	0.259	42.92	5.23	0.000546	F2rl2	coagulation factor II thrombin receptor like 2 (F2rl2), mRNA
XM_028881038.2	6344	0.19	-2.63	0.862	5.12	-18.63	0.000546	Palld	palladin, cytoskeletal associated protein (Palld), transcript variant X2, mRNA
XM_028868470.2	1803	3.13	-1.72	0.935	10.27	-13.15	0.000546	LOC114692629	phospholipid transfer protein (LOC114692629), mRNA
XM_028872315.2	3986	1.04	-1.47	1	21.09	-10.44	0.000546	Efnb2	ephrin B2 (Efnb2), mRNA
XM_028879753.2	3262	3.1	1.08	1	33.93	4.99	0.000546	Galnt3	polypeptide N-acetylgalactosaminyltransferase 3 (Galnt3), mRNA
XM_037203675.1	621	228.68	32.92	4.95e-10	51.39	-24.12	0.000552	Rpl17	60S ribosomal protein L17-like (LOC114691061), mRNA
XM_037210678.1	2925	3.68	3093.24	0.00039	3.32	2630.24	0.000578	Eif3c	eukaryotic translation initiation factor 3 subunit C (LOC114686662), transcript variant X1, mRNA
XM_037198316.1	3086	0.22	-3.92	0.878	340.39	-38.1	0.000578	Serpine1	serpin family E member 1 (Serpine1), transcript variant X2, mRNA
XM_028884620.2	1361	54.74	-1.28	1	110.26	5.63	0.000578	Rgs2	regulator of G protein signaling 2 (Rgs2), mRNA
XM_028864351.2	7118	0.22	1.41	1	0.21	-293.91	0.000589	Pbx1	PBX homeobox 1 (Pbx1), transcript variant X1, mRNA
XM_037196930.1	1053	4.18	1.8	1	2.85	71.61	0.000604	LOC114691688	oligosaccharyltransferase complex subunit OSTC-like (LOC114691688), mRNA
XR_005091779.1	854	7.84	-2.69	0.852	8.26	-48.3	0.000612	LOC119088183	CD5 antigen-like (LOC119088183), transcript variant X3, misc_RNA
XM_037207725.1	399	53.97	-5839.31	4.98e-06	10.29	-2078.77	0.000625	Ubl5	ubiquitin like 5 (Ubl5), transcript variant X3, mRNA
XM_028886691.2	6751	0.73	1.72	1	0.76	55.6	0.000663	Creb1	cAMP responsive element binding protein 1 (Creb1), transcript variant X7, mRNA
XM_037207552.1	16629	0.58	-1.26	1	0.39	1236.34	0.000663	Kmt2a	lysine methyltransferase 2A (Kmt2a), transcript variant X2, mRNA
XM_037202517.1	3221	1.08	1.34	1	1.92	24.22	0.000693	Dcaf12	DDB1 and CUL4 associated factor 12 (Dcaf12), transcript variant X2, mRNA
XM_028862537.2	1876	7	-1.49	0.977	6.76	10.24	0.000712	Tnfsf9	TNF superfamily member 9 (Tnfsf9), mRNA
XM_028889642.2	3633	1.07	-1.76	1	1.21	233.39	0.000744	Unk	unk zinc finger (Unk), transcript variant X1, mRNA
XM_028877988.2	4275	0.99	-2.11	1	1.15	301.62	0.000787	Mms22l	MMS22 like, DNA repair protein (Mms22l), transcript variant X1, mRNA
XM_037205689.1	1643	0.03	-2.07	NaN	1.53	-113.31	0.000787	Slc25a48	solute carrier family 25 member 48 (Slc25a48), transcript variant X5, mRNA
XM_037208890.1	4412	5.94	16.49	0.00471	4.49	26.54	0.00079	Evc	EvC ciliary complex subunit 1 (Evc), transcript variant X3, mRNA
XM_028881057.2	6339	0.34	1.13	1	0.32	-112.9	0.00079	Mfap3l	microfibril associated protein 3 like (Mfap3l), transcript variant X2, mRNA
XM_037209458.1	2382	2.84	-1.84	0.758	5.78	21.66	0.000817	Adam8	ADAM metallopeptidase domain 8 (Adam8), transcript variant X3, mRNA
XM_037200761.1	2055	1.51	-2.83	0.684	15.79	-8.52	0.000834	Trim16	tripartite motif containing 16 (Trim16), transcript variant X2, mRNA
XM_028874415.2	5220	0.84	-1071.94	0.00251	3.08	2600.65	0.000888	Cbx5	chromobox 5 (Cbx5), transcript variant X6, mRNA
XM_037209055.1	4763	0.22	1.73	1	0.6	-156.4	0.000888	Rbm47	RNA binding motif protein 47 (Rbm47), transcript variant X6, mRNA
XM_028885179.2	1324	7.78	1.7	0.921	13.86	-7.61	0.000894	Ca1	carbonic anhydrase 1 (LOC114704125), transcript variant X1, mRNA
XM_028859532.2	3162	1.64	479.75	0.000108	0.68	-162.34	0.000908	LOC114684978	adhesion G protein-coupled receptor E4-like (LOC114684978), transcript variant X1, mRNA
XM_037210818.1	4530	1.6	1.12	1	1.65	1416.92	0.000915	Papola	poly(A) polymerase alpha (Papola), transcript variant X1, mRNA
XM_037197511.1	6264	7.58	1.68	0.137	21.39	3.68	0.000929	Phf20l1	PHD finger protein 20 like 1 (Phf20l1), transcript variant X3, mRNA
XM_037208561.1	2760	0.93	-2.31	0.952	0.62	-708.83	0.00102	Znf219	zinc finger protein 219 (Znf219), transcript variant X5, mRNA
XM_028865122.2	1456	0.81	1.26	1	90.48	-13	0.00102	Plet1	placenta-expressed transcript 1 protein-like (LOC114690363), mRNA
XM_037200103.1	3782	0.15	1.04	1	1.06	-2426.71	0.00102	Hk1	hexokinase 1 (Hk1), transcript variant X1, mRNA
XM_037202190.1	2828	18.25	-1.51	1	8.26	20.87	0.00104	Lilra6	leukocyte immunoglobulin-like receptor subfamily A member 6 (LOC119087306), mRNA
XM_028874738.2	2861	11.91	-3.45	0.162	214.33	-27.83	0.00107	Prg4	proteoglycan 4 (Prg4), transcript variant X3, mRNA
XM_028885117.2	2618	4.99	-1.42	1	5.78	2344.21	0.00107	Mia2	MIA SH3 domain ER export factor 2 (Mia2), transcript variant X11, mRNA
XM_037208745.1	3186	0.63	3.19	0.993	1.12	-1589.4	0.00108	Bap1	BRCA1 associated protein 1 (Bap1), transcript variant X2, mRNA
XM_037207551.1	16632	0.35	1.21	1	0.17	-1343.41	0.00108	Kmt2a	lysine methyltransferase 2A (Kmt2a), transcript variant X1, mRNA
XM_028882246.2	4922	0.38	-1.58	1	0.71	-379.05	0.00112	Rbm47	RNA binding motif protein 47 (Rbm47), transcript variant X1, mRNA
XM_028887013.2	1973	2.05	-1.18	1	2.13	878.61	0.00112	Rbm6	RNA binding motif protein 6 (Rbm6), transcript variant X5, mRNA
XR_005091466.1	1049	1.8	2.68	0.959	2.6	36.39	0.00114	LOC119087922	uncharacterized LOC119087922 (LOC119087922), transcript variant X1, ncRNA
XM_037197859.1	2636	3.55	-1.43	1	3.19	2083.25	0.00114	Dennd1c	DENN domain containing 1C (Dennd1c), transcript variant X1, mRNA
XM_037207586.1	5647	9.62	-1.85	0.545	4.5	13.61	0.00117	Sorl1	sortilin related receptor 1 (Sorl1), transcript variant X2, mRNA
XM_028894463.2	1050	10.46	-1.63	0.85	31.73	-6.19	0.00117	Hebp1	heme binding protein 1 (Hebp1), mRNA
XM_028883388.2	5437	0.02	-3.67	NaN	0.39	-192.04	0.00117	Relch	RAB11 binding and LisH domain, coiled-coil and HEAT repeat containing (Relch), transcript variant X1, mRNA
XM_028885415.2	3311	0	4.43	NaN	0.46	-1495.48	0.00123	Ncdn	neurochondrin (Ncdn), transcript variant X3, mRNA
XM_028877507.2	7134	0.82	1.45	1	0.29	-980.02	0.00125	Arrb1	arrestin beta 1 (Arrb1), transcript variant X5, mRNA
XM_037203529.1	10896	0.09	1.04	1	0.17	-287.74	0.00125	Akap9	A-kinase anchoring protein 9 (Akap9), transcript variant X8, mRNA
XM_028868075.2	5452	0.58	-2.91	0.843	1.18	1438.9	0.00133	Paqr8	progestin and adipoQ receptor family member 8 (Paqr8), transcript variant X3, mRNA
XM_037208633.1	6814	0.61	-931.33	0.00573	0.75	131.56	0.00134	Zmiz1	zinc finger MIZ-type containing 1 (Zmiz1), transcript variant X6, mRNA
XM_037201661.1	3799	5.27	1.21	1	4.43	9.27	0.0014	LOC114684193	killer cell immunoglobulin-like receptor 3DL1 (LOC114684193), transcript variant X1, mRNA
XM_037202196.1	1039	8.21	-1.08	1	12.87	2100.82	0.0014	Lilra5	leukocyte immunoglobulin-like receptor subfamily A member 5 (LOC114686725), transcript variant X2, mRNA
XM_028874876.2	10902	0.43	-1.06	1	0.59	1505.22	0.00141	Vps13a	vacuolar protein sorting 13 homolog A (Vps13a), transcript variant X2, mRNA
XM_028871102.2	3767	1.17	1.93	1	0.88	-986.64	0.00147	Osbpl5	oxysterol binding protein like 5 (Osbpl5), transcript variant X4, mRNA
XM_028883336.1	7975	0.98	1.06	1	0.47	795.92	0.00151	Tsc1	TSC complex subunit 1 (Tsc1), transcript variant X8, mRNA
XM_028875917.1	4618	17.79	-3.39	4.84e-06	13.03	-3.38	0.00157	Ddx3x	DEAD-box helicase 3 X-linked (Ddx3x), transcript variant X2, mRNA
XM_028860518.2	2384	1.08	-1.02	1	1.67	65.46	0.00164	Ptcd3	pentatricopeptide repeat domain 3 (Ptcd3), transcript variant X2, mRNA
XM_028868628.2	702	270.66	-1.45	1	174.19	17.75	0.00164	Wfdc2	WAP four-disulfide core domain 2 (Wfdc2), transcript variant X1, mRNA
XM_028890568.2	4531	1.78	1.89	0.683	1.01	979.76	0.00172	Synrg	synergin gamma (Synrg), transcript variant X3, mRNA
XM_037204081.1	1233	4.87	1.85	0.909	1.79	138.83	0.00172	LOC114701394	natural killer cells antigen CD94-like (LOC114701394), transcript variant X2, mRNA
XM_037211662.1	2417	1.91	3.23	0.957	0.74	-83.78	0.00172	Ash2l	ASH2 like, histone lysine methyltransferase complex subunit (Ash2l), transcript variant X5, mRNA
XM_028880331.2	4765	5.89	-1.03	1	11.73	4.27	0.00172	Mctp2	multiple C2 and transmembrane domain containing 2 (Mctp2), transcript variant X1, mRNA
XM_028877477.2	5861	0.61	1.46	1	0.64	56.18	0.00172	Emsy	EMSY transcriptional repressor, BRCA2 interacting (Emsy), transcript variant X5, mRNA
XM_028888369.2	4147	2.35	1.35	1	2.27	1727.76	0.00172	Kctd20	potassium channel tetramerization domain containing 20 (Kctd20), transcript variant X1, mRNA
XM_028867578.2	8519	3.66	-1.37	1	0.85	1583.09	0.00174	Itpr1	inositol 1,4,5-trisphosphate receptor type 1 (Itpr1), transcript variant X12, mRNA
XM_028875764.2	5509	4.38	-1.22	1	11.53	-5.62	0.00174	Fmnl2	formin like 2 (Fmnl2), transcript variant X8, mRNA
XM_028875939.2	6227	0.68	1.42	1	1.02	1262.21	0.00174	Bcor	BCL6 corepressor (Bcor), transcript variant X8, mRNA
XM_028868701.2	2868	0.76	-1.16	1	0.53	-189.73	0.00175	Nsmf	NMDA receptor synaptonuclear signaling and neuronal migration factor (Nsmf), transcript variant X1, mRNA
XM_028884420.2	6791	0.18	2.56	1	0.93	-73.26	0.00177	Npr3	natriuretic peptide receptor 3 (Npr3), transcript variant X1, mRNA
XM_037204140.1	3374	0.99	-2.31	0.851	1.2	224.22	0.00179	Cd4	CD4 molecule (Cd4), transcript variant X2, mRNA
XM_037197267.1	5858	0.44	-590.78	0.0135	0.36	-99.7	0.0018	Emsy	EMSY transcriptional repressor, BRCA2 interacting (Emsy), transcript variant X7, mRNA
XM_037198632.1	8925	0.07	-199.3	0.0413	0.19	-121.28	0.0018	Cit	citron rho-interacting serine/threonine kinase (Cit), transcript variant X5, mRNA
XM_037211430.1	1470	59.68	1.68	0.206	59.43	3.3	0.0018	Ctse	cathepsin E (Ctse), transcript variant X2, mRNA
XM_037210395.1	5290	0.24	2.88	0.983	0.3	-124.14	0.00188	Aox4	aldehyde oxidase 4 (LOC114704588), transcript variant X2, mRNA
XM_028881876.2	636	143	-2.14	0.00659	67.17	-6.4	0.00201	LOC114701718	platelet factor 4-like (LOC114701718), mRNA
XM_028866014.2	8034	0.84	1.62	1	0.48	151.83	0.00201	Xrn1	5'-3' exoribonuclease 1 (Xrn1), transcript variant X3, mRNA
XM_028868535.2	7547	1.44	3033.56	0.00125	0.61	1034.31	0.00204	Ncoa3	nuclear receptor coactivator 3 (Ncoa3), transcript variant X3, mRNA
XM_037200359.1	6172	0.03	16.07	0.236	0.77	-1502.94	0.00204	Mybpc2	myosin binding protein C2 (Mybpc2), transcript variant X4, mRNA
XM_028886619.2	7848	0.31	1.4	1	0.42	-1504	0.00204	Foxn3	forkhead box N3 (Foxn3), transcript variant X8, mRNA
XM_028887708.2	3968	0.33	-1.99	1	0.34	-719.51	0.00204	Mapre2	microtubule associated protein RP/EB family member 2 (Mapre2), transcript variant X3, mRNA
XM_028890549.2	820	2.3	1.66	1	31.31	-9.82	0.00205	Ccl4	C-C motif chemokine 4-like (LOC114707728), mRNA
XM_028872738.2	1686	15.3	-2.79	0.0674	76.99	5.34	0.00206	Prok2	prokineticin 2 (Prok2), mRNA
XM_028881846.2	2284	0.02	-1.78	NaN	0.69	-1058.02	0.00214	Xrn2	5'-3' exoribonuclease 2 (Xrn2), transcript variant X2, mRNA
XM_028894760.2	3241	1.9	-1.27	1	1.9	1127.88	0.00217	Rnf38	ring finger protein 38 (Rnf38), transcript variant X7, mRNA
XM_037211229.1	2653	8.21	1.74	1	4.58	1920.74	0.00219	Slamf6	SLAM family member 6 (Slamf6), transcript variant X2, mRNA
XM_037206673.1	2687	0.11	1.6	1	0.44	-70.5	0.00221	Hsp90aa1	heat shock protein HSP 90-alpha-like (LOC114691694), mRNA
XM_028893797.2	2237	31.82	1.01	1	37.57	4.28	0.00223	LOC114709824	aldehyde dehydrogenase, cytosolic 1-like (LOC114709824), mRNA
XM_037197995.1	5656	1.6	-2.02	1	1.04	143.08	0.00223	Man2a2	mannosidase alpha class 2A member 2 (Man2a2), transcript variant X3, mRNA
XM_037211383.1	6953	1.52	-1.52	1	1.16	1521.99	0.00223	Ptprv	receptor-type tyrosine-protein phosphatase V-like (LOC114698118), transcript variant X1, mRNA
XM_037205912.1	5326	1.2	-23.39	0.00948	1.62	1519.82	0.00225	Zkscan3	zinc finger protein with KRAB and SCAN domains 3 (LOC114699987), transcript variant X2, mRNA
XM_028868229.2	4611	1.52	5.66	0.0624	0.68	229.01	0.00225	Farp1	FERM, ARH/RhoGEF and pleckstrin domain protein 1 (Farp1), transcript variant X1, mRNA
XM_028872349.2	3768	17.56	-1.35	0.57	22.05	4.35	0.00225	Mtus1	microtubule associated scaffold protein 1 (Mtus1), transcript variant X5, mRNA
XM_028893379.2	4270	0.67	1.63	1	15.01	-7.73	0.00242	Mertk	MER proto-oncogene, tyrosine kinase (Mertk), mRNA
XM_028876034.2	5944	1.84	-4.67	0.136	1.33	19.1	0.00245	Asap1	ArfGAP with SH3 domain, ankyrin repeat and PH domain 1 (Asap1), transcript variant X8, mRNA
XM_028863667.2	12662	0.53	1.17	1	0.32	964.17	0.00247	Nsd1	nuclear receptor binding SET domain protein 1 (Nsd1), transcript variant X6, mRNA
XM_028890441.2	4832	0.62	-3.23	0.929	0.37	-64.4	0.00256	Snrk	SNF related kinase (Snrk), transcript variant X4, mRNA
XM_037208903.1	2976	3.46	-1.08	1	2.3	1159.48	0.00266	LOC114708308	ubiquitin carboxyl-terminal hydrolase 1-like (LOC114708308), mRNA
XM_028877111.2	3356	0.47	3.32	0.972	0.29	-707.42	0.00283	Ifnar1	interferon alpha and beta receptor subunit 1 (Ifnar1), transcript variant X3, mRNA
XM_028877476.2	5903	0.32	1.21	1	0.18	-879.92	0.00286	Emsy	EMSY transcriptional repressor, BRCA2 interacting (Emsy), transcript variant X4, mRNA
XM_028873768.2	4864	0.79	1.37	1	1.08	1022.3	0.00288	Crtc3	CREB regulated transcription coactivator 3 (Crtc3), transcript variant X2, mRNA
XM_037198005.1	1896	16.57	-2.09	0.125	100.11	-7.11	0.00291	LOC119086450	pollen-specific leucine-rich repeat extensin-like protein 1 (LOC119086450), partial mRNA
XM_037207217.1	2181	13.68	1.52	0.476	3.32	1232.42	0.00291	Ifi44l	interferon induced protein 44 like (Ifi44l), transcript variant X2, mRNA
XM_037200327.1	2586	3.42	-1.21	1	9	-5.6	0.00291	Zc3h12d	zinc finger CCCH-type containing 12D (Zc3h12d), transcript variant X6, mRNA
XM_028867481.2	6442	2.14	3501.44	0.00071	1.35	308.56	0.00292	Cblb	Cbl proto-oncogene B (Cblb), transcript variant X2, mRNA
XM_037202232.1	1499	11.48	-2.03	0.284	27.51	4.83	0.00295	Nlrp12	NLR family pyrin domain containing 12 (Nlrp12), transcript variant X2, mRNA
XM_028884282.2	3439	2.95	-1.05	1	16.6	-6.21	0.00296	Fads1	fatty acid desaturase 1 (Fads1), mRNA
XM_037207863.1	1500	8.69	-9.87	0.0168	4.06	-18.22	0.00303	LOC114693581	coxsackievirus and adenovirus receptor homolog (LOC114693581), transcript variant X3, mRNA
XM_028870186.2	3225	0	NaN	NaN	0.58	-553.28	0.00308	Sfswap	splicing factor SWAP (LOC114693683), transcript variant X2, mRNA
XM_037197471.1	4456	0.94	1.02	1	0.86	716.74	0.00308	Sytl2	synaptotagmin like 2 (Sytl2), transcript variant X7, mRNA
XM_028883774.2	7325	0.29	-447.8	0.0148	0.47	-938.99	0.0031	Traf3	TNF receptor associated factor 3 (Traf3), transcript variant X6, mRNA
XM_028869076.2	5735	0.25	-1.51	1	0.51	-19.56	0.00316	Arhgap23	Rho GTPase activating protein 23 (Arhgap23), mRNA
XM_028854926.2	3348	3.13	-1.16	1	2.23	1230.75	0.00327	Prkd2	protein kinase D2 (Prkd2), transcript variant X2, mRNA
XM_028855777.2	9254	2.11	1.23	1	0.31	632.89	0.00327	Znf831	zinc finger protein 831 (Znf831), transcript variant X2, mRNA
XM_037202220.1	2362	1.26	2.22	1	2.86	1193.54	0.00327	Lilrb3	leukocyte immunoglobulin-like receptor subfamily B member 3 (LOC114689150), transcript variant X4, mRNA
XM_037202753.1	3172	0.79	-1.67	1	2.76	18.66	0.00329	Mier1	MIER1 transcriptional regulator (Mier1), transcript variant X11, mRNA
XM_037207042.1	2026	18.3	-1.33	1	27.91	9.15	0.00329	LOC119088213	uncharacterized LOC119088213 (LOC119088213), mRNA
XM_028883044.2	4633	0.5	-1.5	1	0.52	92.32	0.00342	Acad8	acyl-CoA dehydrogenase family member 8 (Acad8), transcript variant X1, mRNA
XM_028893595.2	9950	0.18	1.06	1	0.12	-195.15	0.00349	Kif1b	kinesin family member 1B (Kif1b), transcript variant X7, mRNA
XM_028881627.2	5955	2.26	2	0.908	4.5	8.9	0.00352	Stag2	stromal antigen 2 (Stag2), transcript variant X2, mRNA
XM_037208888.1	3233	1.49	1.11	1	1.85	1027.42	0.00352	Jakmip1	janus kinase and microtubule interacting protein 1 (Jakmip1), transcript variant X8, mRNA
XM_028881877.2	1216	0.03	-3.03	NaN	153.8	-24.03	0.00352	Cxcl3	C-X-C motif chemokine 3-like (LOC114701719), mRNA
XM_028869900.2	7737	0.16	-359.51	0.028	0.44	683.97	0.00352	Dnajc13	DnaJ heat shock protein family (Hsp40) member C13 (Dnajc13), transcript variant X1, mRNA
XM_028883315.2	10870	3.38	1.28	1	0.99	17.55	0.00353	Setx	senataxin (Setx), transcript variant X1, mRNA
XM_028867613.1	5658	0.84	-210.22	9.3e-07	0.35	-1072.17	0.00355	Smc6	structural maintenance of chromosomes 6 (Smc6), transcript variant X1, mRNA
XM_028866704.2	6434	0.25	1.02	1	0.59	347.92	0.00355	Rap1gap2	RAP1 GTPase activating protein 2 (Rap1gap2), transcript variant X8, mRNA
XM_037205933.1	13499	0.05	-1.8	1	0.12	-773.27	0.00355	Lyst	lysosomal trafficking regulator (Lyst), transcript variant X1, mRNA
XM_028880650.2	955	18.61	527.36	4.82e-14	3.48	83.37	0.00365	Ctrc	chymotrypsin C (Ctrc), mRNA
XM_037202076.1	1845	2.97	-1265.42	0.00124	3.52	272.11	0.00365	LOC114703946	3-beta-hydroxysteroid sulfotransferase-like (LOC114703946), transcript variant X1, mRNA
XM_037205031.1	1753	0.81	-1.19	1	1.38	-873.43	0.00365	Cd82	CD82 molecule (Cd82), transcript variant X2, mRNA
XM_028861022.2	6317	1.94	-1.12	1	0.8	914.84	0.00365	Col11a2	collagen type XI alpha 2 chain (Col11a2), transcript variant X3, mRNA
XM_028859820.2	7083	0.73	-1.21	1	0.31	248.88	0.00366	Kbtbd11	kelch repeat and BTB domain containing 11 (Kbtbd11), transcript variant X2, mRNA
XM_028881673.2	6871	0.4	-18.86	0.0467	0.69	117.74	0.00367	Zfx	zinc finger protein X-linked (Zfx), transcript variant X4, mRNA
XM_037197002.1	2747	0.41	-231.55	0.0461	0.44	-546	0.00374	Znf397	zinc finger protein 397 (Znf397), transcript variant X3, mRNA
XM_028854957.2	2760	4.4	-1.69	0.677	27	3.72	0.00374	C5ar2	complement component 5a receptor 2 (C5ar2), mRNA
XM_028894211.2	858	30.15	1.94	0.887	204.99	-7.14	0.00374	Prg2	proteoglycan 2, pro eosinophil major basic protein (Prg2), mRNA
XM_028877935.1	6617	0.16	2.26	1	0.47	-856.17	0.00374	Frs2	fibroblast growth factor receptor substrate 2 (Frs2), transcript variant X1, mRNA
XM_037210553.1	1709	0.07	-2.63	1	0.3	-81.48	0.00374	LOC114693407	fructose-bisphosphate aldolase A-like (LOC114693407), mRNA
XM_028857150.2	1813	8.37	44.97	1.63e-05	2.95	1359.01	0.00375	Btnl10	butyrophilin like 10 (Btnl10), transcript variant X6, mRNA
XM_028868280.2	2354	1.39	-2.59	0.972	1.22	-794.52	0.00375	Ggact	gamma-glutamylamine cyclotransferase (Ggact), transcript variant X1, mRNA
XM_037206600.1	6861	0.17	5.09	0.605	0.32	-666.92	0.00379	Myof	myoferlin (Myof), transcript variant X1, mRNA
XM_028866291.2	6955	2.2	-1.06	1	14.71	3.78	0.00379	Gramd1b	GRAM domain containing 1B (Gramd1b), transcript variant X15, mRNA
XM_028891141.2	4751	0.29	-1.17	1	0.57	550.82	0.00379	Sec31b	SEC31 homolog B, COPII coat complex component (Sec31b), transcript variant X2, mRNA
XM_028868522.2	4061	5.75	-1.25	1	15.46	3.88	0.00379	Chst15	carbohydrate sulfotransferase 15 (Chst15), transcript variant X2, mRNA
XM_028868385.2	3404	3.73	-1.03	1	29.32	-5.08	0.00382	Mafb	MAF bZIP transcription factor B (Mafb), mRNA
XM_037209863.1	857	1.85	-13.05	0.0611	2.59	-23.81	0.00383	LOC114688943	nascent polypeptide-associated complex subunit alpha-like (LOC114688943), mRNA
XM_028881893.2	1292	0.3	4.66	0.881	188.29	-6.99	0.00383	Cxcl2	C-X-C motif chemokine 2-like (LOC114701735), mRNA
XM_037198194.1	3630	0.11	-40.01	0.356	0.37	-650.29	0.00384	Uhrf1	ubiquitin like with PHD and ring finger domains 1 (Uhrf1), transcript variant X2, mRNA
XM_028869466.2	6515	0.86	-4.96	0.523	0.61	-1129.92	0.00384	Zbtb4	zinc finger and BTB domain containing 4 (Zbtb4), transcript variant X3, mRNA
XM_028862449.2	4234	0.41	1.24	1	0.67	140.03	0.00385	Fmr1	FMRP translational regulator 1 (Fmr1), transcript variant X4, mRNA
XM_037208079.1	2212	0.99	6.94	0.455	1.8	863.48	0.00388	Xcr1	X-C motif chemokine receptor 1 (Xcr1), transcript variant X2, mRNA
XM_028856063.2	6620	0.09	21.1	0.667	0.12	-1200.89	0.00394	Cracd	capping protein inhibiting regulator of actin dynamics (Cracd), transcript variant X2, mRNA
XM_037202588.1	4027	0.72	206.59	0.000183	0.71	174.39	0.00395	Slc25a51	solute carrier family 25 member 51 (Slc25a51), transcript variant X10, mRNA
XM_028883188.2	3448	0.22	81.14	0.0137	0.22	-978.12	0.00395	Nefl	neurofilament light (Nefl), mRNA
XR_005091834.1	1743	25.86	-1.83	0.667	41.57	6.65	0.00395	LOC119088214	uncharacterized LOC119088214 (LOC119088214), ncRNA
XM_028868336.2	3764	0.73	-1.09	1	0.23	-269.59	0.00395	Ncoa7	nuclear receptor coactivator 7 (Ncoa7), transcript variant X3, mRNA
XM_028882057.2	484	0.67	1.47	1	15.57	-39.5	0.00395	Defa14	neutrophil antibiotic peptide NP-2-like (LOC114701864), mRNA
XM_037207226.1	4726	0.21	-1.4	1	0.22	-440.97	0.00395	Sec31b	SEC31 homolog B, COPII coat complex component (Sec31b), transcript variant X7, mRNA
XR_005090754.1	709	13.88	2.11	1	5.84	1003.08	0.00395	LOC119087346	uncharacterized LOC119087346 (LOC119087346), transcript variant X2, ncRNA
XM_028876579.2	3846	0.5	-2.32	1	0.78	235.09	0.00395	Prpf40a	pre-mRNA processing factor 40 homolog A (Prpf40a), transcript variant X11, mRNA
XM_037202956.1	1986	0.17	-3.58	1	0.42	-748.46	0.00397	LOC114682050	gasdermin-D-like (LOC114682050), transcript variant X3, mRNA
XM_037197780.1	4383	0.9	-1.03	1	0.54	-620.82	0.00402	Oxr1	oxidation resistance 1 (Oxr1), transcript variant X6, mRNA
XM_037208080.1	2197	0.35	-1.3	1	0.83	80.28	0.00402	Xcr1	X-C motif chemokine receptor 1 (Xcr1), transcript variant X3, mRNA
XM_028880894.2	2770	1.95	1.43	1	1.81	847.12	0.00402	Vps9d1	VPS9 domain containing 1 (Vps9d1), transcript variant X2, mRNA
XM_037210445.1	5569	0.1	188.27	0.0536	0.16	-567.84	0.00407	LOC114705310	protein-lysine methyltransferase METTL21E (LOC114705310), transcript variant X5, mRNA
XM_028869680.2	7774	0.21	1.09	1	0.22	-510.13	0.00408	Heatr5a	HEAT repeat containing 5A (Heatr5a), transcript variant X1, mRNA
XM_037211634.1	6643	0.02	-1.13	1	0.13	-140.72	0.00408	Ank1	ankyrin 1 (Ank1), transcript variant X6, mRNA
XM_037211423.1	3573	0.59	1.5	1	0.85	623.81	0.00408	Rbbp5	RB binding protein 5, histone lysine methyltransferase complex subunit (Rbbp5), transcript variant X2, mRNA
XM_028877952.1	2646	0.2	31.54	0.117	0.39	-142.54	0.00413	Cnot2	CCR4-NOT transcription complex subunit 2 (Cnot2), transcript variant X10, mRNA
XM_028870356.2	15813	0.49	1.75	0.861	0.2	674.36	0.00418	Sacs	sacsin molecular chaperone (Sacs), transcript variant X3, mRNA
XM_028868449.2	2365	9.57	1.39	0.777	251.65	-9.98	0.00426	Sdc4	syndecan 4 (Sdc4), mRNA
XM_037199829.1	4184	1.62	1.54	1	0.69	137.07	0.00428	LOC114701133	phenazine biosynthesis-like domain-containing protein 2 (LOC114701133), transcript variant X4, mRNA
XR_005090282.1	1860	4.09	1.78	0.781	18.71	-8.34	0.00428	LOC114686317	UL16-binding protein 1-like (LOC114686317), transcript variant X2, misc_RNA
XM_037198964.1	4915	0.66	3.43	0.863	0.56	546.02	0.00428	Kdm6a	lysine demethylase 6A (Kdm6a), transcript variant X4, mRNA
XM_028878536.2	926	4.89	2.32	0.909	3.42	674.45	0.00435	LOC114699472	ragulator complex protein LAMTOR3 (LOC114699472), mRNA
XM_037208773.1	5428	0.47	2.43	0.952	0.88	24	0.00435	LOC114702135	sarcolemma associated protein (LOC114702135), transcript variant X9, mRNA
XM_028876790.2	2014	3.55	-1.11	1	17.47	-6.96	0.00435	Atf3	activating transcription factor 3 (Atf3), transcript variant X2, mRNA
XM_037203590.1	3822	6.2	-1.09	1	11.04	4.34	0.00439	Srpk2	SRSF protein kinase 2 (Srpk2), transcript variant X14, mRNA
XM_037198910.1	3825	0.06	-1.53	1	0.34	-576.99	0.00444	Fan1	FANCD2 and FANCI associated nuclease 1 (Fan1), transcript variant X2, mRNA
XM_028855069.2	2128	0.29	50.49	0.0514	0.78	-488.02	0.00446	Coq8b	coenzyme Q8B (Coq8b), transcript variant X3, mRNA
XM_028866286.2	3090	1.28	-1.1	1	9.5	7.68	0.00448	Gramd1b	GRAM domain containing 1B (Gramd1b), transcript variant X8, mRNA
XM_028889386.2	3780	0.45	-1.4	1	1.32	24.7	0.00449	Ccnj	cyclin J (Ccnj), transcript variant X3, mRNA
XM_037209730.1	1257	1.61	1.06	1	1.22	-146.87	0.00452	LOC114685169	nuclear receptor-binding factor 2-like (LOC114685169), mRNA
XM_028869550.2	1523	0.3	-110.06	0.0658	1.48	-582.87	0.00459	Aurkb	aurora kinase B (Aurkb), transcript variant X2, mRNA
XM_028892037.2	6742	0.01	5.15	NaN	0.11	-1096.3	0.00459	Taf1	TATA-box binding protein associated factor 1 (Taf1), transcript variant X2, mRNA
XM_028875399.2	1095	18.47	-1.64	0.583	132.74	-9.63	0.00459	C1qb	complement C1q B chain (C1qb), mRNA
XM_028882220.2	3223	8.45	-1.33	0.994	26.69	3.53	0.00459	Tlr6	toll like receptor 6 (Tlr6), transcript variant X1, mRNA
XM_028854155.2	4738	0.9	-1.25	1	0.48	525.81	0.00459	Edil3	EGF like repeats and discoidin domains 3 (Edil3), transcript variant X1, mRNA
XM_028869437.2	6797	11.42	-1.29	0.707	11.62	3.51	0.00467	Kdm6b	lysine demethylase 6B (Kdm6b), transcript variant X2, mRNA
XM_028864240.2	5567	0.58	-2	1	0.53	586.14	0.00467	Cyfip2	cytoplasmic FMR1 interacting protein 2 (Cyfip2), transcript variant X5, mRNA
XM_028874613.2	4369	0.07	-3.75	1	0.46	-608.66	0.00467	Fmnl3	formin like 3 (Fmnl3), transcript variant X2, mRNA
XM_028875319.1	4742	0.17	-1.75	1	0.4	156.41	0.00467	Ncoa1	nuclear receptor coactivator 1 (Ncoa1), transcript variant X3, mRNA
XM_028874410.2	5319	0.32	-431.4	0.00619	0.18	-648.53	0.00472	Cbx5	chromobox 5 (Cbx5), transcript variant X2, mRNA
XM_037199063.1	1567	2.11	1029.57	0.00619	0.95	124.45	0.00472	Arr3	arrestin 3 (Arr3), transcript variant X7, mRNA
XM_028894623.2	7962	0.29	1.1	1	0.4	575.68	0.00472	Kiaa2026	KIAA2026 ortholog (Kiaa2026), transcript variant X3, mRNA
XM_037204576.1	4689	2.43	-1.91	1	1.1	-946.15	0.00472	Prrc2b	proline rich coiled-coil 2B (Prrc2b), transcript variant X10, mRNA
XM_028891744.2	3776	5.55	-1.66	0.517	5.47	-4.65	0.00474	Prkar2b	protein kinase cAMP-dependent type II regulatory subunit beta (Prkar2b), transcript variant X1, mRNA
XM_028869259.2	8314	20.39	-1.18	1	58.17	4.27	0.00474	Lrrk2	leucine rich repeat kinase 2 (Lrrk2), mRNA
XM_028857084.2	1505	3.67	-1.45	1	28.67	-7.08	0.00475	Adora2b	adenosine A2b receptor (Adora2b), mRNA
XM_028869932.2	7874	0.16	-1.62	1	0.72	1059.66	0.00475	Baz2b	bromodomain adjacent to zinc finger domain 2B (Baz2b), transcript variant X14, mRNA
XM_028873431.2	3785	2.91	1.93	0.517	14.06	6.01	0.00475	Picalm	phosphatidylinositol binding clathrin assembly protein (Picalm), transcript variant X10, mRNA
XM_028857749.2	5591	0.52	2.05	1	0.46	-772.85	0.00476	Fktn	fukutin (Fktn), transcript variant X1, mRNA
XM_028855041.2	2910	0.58	587.9	0.0187	1.07	700.42	0.00479	Akt2	AKT serine/threonine kinase 2 (Akt2), transcript variant X4, mRNA
XM_028871528.2	11970	0.24	1.01	1	0.33	-971.79	0.00479	Chd9	chromodomain helicase DNA binding protein 9 (Chd9), transcript variant X9, mRNA
XM_028883187.2	4763	0.06	9.68	0.326	0.18	-119.84	0.00483	Nefm	neurofilament medium (Nefm), mRNA
XM_037205355.1	7502	0.46	3.3	0.921	0.15	-464.42	0.00486	Cep250	centrosomal protein 250 (Cep250), transcript variant X5, mRNA
XM_028878538.2	728	3.72	-1.37	1	2.63	-43.72	0.00486	Dnajc15	DnaJ heat shock protein family (Hsp40) member C15 (Dnajc15), transcript variant X1, mRNA
XM_028873056.2	6635	1.89	1.2	1	7.84	4.23	0.0049	Osbpl8	oxysterol binding protein like 8 (Osbpl8), transcript variant X12, mRNA
XM_028884473.2	1490	0.26	-1.77	1	0.42	-120.52	0.00492	Stk3	serine/threonine kinase 3 (Stk3), transcript variant X3, mRNA
XM_028869353.2	3700	0.38	-454.44	0.0213	0.4	-615.59	0.00495	Map2k4	mitogen-activated protein kinase kinase 4 (Map2k4), transcript variant X1, mRNA
XM_028866373.2	8685	1.25	1.38	1	0.65	977.02	0.00495	Bcl9l	BCL9 like (Bcl9l), transcript variant X1, mRNA
XM_028875672.1	2919	0.21	-1.9	1	2.43	-22.61	0.00495	Rarb	retinoic acid receptor beta (Rarb), transcript variant X1, mRNA
XM_037205195.1	2543	3.85	1.81	0.596	2.8	1261.02	0.00495	Gabpb1	GA binding protein transcription factor subunit beta 1 (Gabpb1), transcript variant X4, mRNA
XM_028873843.2	1603	5.29	2.56	0.433	2.65	785.23	0.00498	Zfand6	zinc finger AN1-type containing 6 (Zfand6), transcript variant X4, mRNA
XM_028886381.2	10274	0.1	4.98	1	0.21	-74.43	0.00498	Atrx	ATRX chromatin remodeler (Atrx), transcript variant X1, mRNA
XM_037211701.1	4434	0.47	-1.24	1	0.63	110.86	0.00505	Tlr3	toll like receptor 3 (Tlr3), transcript variant X2, mRNA
XM_028878245.2	5873	0.44	-1.26	1	0.42	-219.81	0.00506	Mtmr4	myotubularin related protein 4 (Mtmr4), transcript variant X1, mRNA
XM_037200805.1	1086	24.36	-1.13	1	15.56	-12.01	0.00506	LOC114690500	CMRF-35-like molecule 4 (LOC114690500), transcript variant X2, mRNA
XM_028879218.2	7107	0.22	-365.01	0.0262	0.29	-561.81	0.00508	Abhd2	abhydrolase domain containing 2, acylglycerol lipase (Abhd2), transcript variant X2, mRNA
XM_028878078.2	1091	10.66	1.82	1	3.35	934.69	0.00511	Esd	S-formylglutathione hydrolase (LOC114699144), transcript variant X2, mRNA
XM_028856302.2	1386	0.59	-1.11	1	4.07	961.85	0.00511	Dph5	diphthamide biosynthesis 5 (Dph5), transcript variant X3, mRNA
XM_028863506.2	3091	16.49	-1.95	0.232	38.02	4.08	0.0052	Nlrp12	NLR family pyrin domain containing 12 (Nlrp12), transcript variant X1, mRNA
XM_028895112.2	1528	1.03	-2.09	1	0.77	-122.67	0.0052	Hspa14	heat shock protein family A (Hsp70) member 14 (Hspa14), transcript variant X2, mRNA
XM_037204501.1	7036	0.61	2.19	1	0.75	950.31	0.00526	Cntrl	centriolin (Cntrl), transcript variant X12, mRNA
XR_005091238.1	1188	0.87	-2.08	1	1.17	55.25	0.00526	LOC119087761	uncharacterized LOC119087761 (LOC119087761), transcript variant X4, ncRNA
XM_028874933.2	4747	3.04	1.08	1	6.29	4.4	0.00534	Ccnt2	cyclin T2 (Ccnt2), transcript variant X4, mRNA
XR_005089955.1	1926	3.25	1.42	1	1.19	73.97	0.00534	LOC119086628	uncharacterized LOC119086628 (LOC119086628), transcript variant X1, ncRNA
XM_028854688.2	5539	0.68	-1.23	1	0.44	554.83	0.0054	Ift140	intraflagellar transport 140 (Ift140), transcript variant X3, mRNA
XM_037200707.1	7332	1.18	1.45	1	0.66	34.61	0.0054	Ikzf3	IKAROS family zinc finger 3 (Ikzf3), transcript variant X3, mRNA
XM_028868541.2	3886	0.7	-1.41	1	0.28	-148.71	0.00546	Sulf2	sulfatase 2 (Sulf2), transcript variant X3, mRNA
XM_028885548.1	2490	0	NaN	NaN	0.55	-510.73	0.00549	Maz	MYC associated zinc finger protein (Maz), transcript variant X4, mRNA
XM_028856203.2	1814	2.74	-1.5	1	16.98	-5.5	0.0055	Tubb6	tubulin beta 6 class V (Tubb6), mRNA
XM_028873581.2	2851	3.47	-1.15	1	7.46	-5	0.0055	Gch1	GTP cyclohydrolase 1 (Gch1), mRNA
XM_037203853.1	5347	0.73	-1.54	1	0.33	-593.43	0.00554	Exoc6b	exocyst complex component 6B (Exoc6b), transcript variant X3, mRNA
XM_037210781.1	814	1.82	-1.54	1	3.78	196.37	0.00563	LOC114705024	enhancer of rudimentary homolog (LOC114705024), mRNA
XM_037201811.1	1157	3.71	1.05	1	2.73	35.75	0.00565	LOC114689065	RAD52 motif-containing protein 1-like (LOC114689065), mRNA
XM_028856706.2	2354	7.43	-2.05	0.283	14.43	4.15	0.00565	LOC114682729	protein Atg16l2-like (LOC114682729), mRNA
XM_028870676.2	1925	5.6	-1.31	1	16.32	-8.73	0.00565	Tcn2	transcobalamin 2 (Tcn2), mRNA
XM_028875221.2	4522	1.58	2.28	1	0.74	596.09	0.00565	Adcy3	adenylate cyclase 3 (Adcy3), transcript variant X2, mRNA
XM_037204795.1	2997	0.31	-2.02	1	0.48	-449.23	0.00566	Acvr1	activin A receptor type 1 (Acvr1), transcript variant X1, mRNA
XM_037202622.1	2840	1.37	1.06	1	0.31	-555.54	0.00566	Susd1	sushi domain containing 1 (Susd1), transcript variant X1, mRNA
XM_028864966.2	6704	0.36	-627.83	0.0139	0.2	-588.28	0.00568	LOC114690278	protein NPAT (LOC114690278), transcript variant X3, mRNA
XM_037199160.1	3229	1.53	1.69	0.972	0.86	106.4	0.00568	Zfp431	zinc finger protein 431-like (LOC114700701), transcript variant X1, mRNA
XM_028858344.2	6011	0.24	-1.39	1	0.17	-175.62	0.00568	Daam1	dishevelled associated activator of morphogenesis 1 (Daam1), transcript variant X2, mRNA
XM_028860584.2	2310	0.42	1.06	1	1.16	517.36	0.00568	Xcr1	X-C motif chemokine receptor 1 (Xcr1), transcript variant X1, mRNA
XM_028873123.2	2936	0.32	2.34	1	0.29	-569.81	0.00568	Klf4	Kruppel like factor 4 (Klf4), transcript variant X1, mRNA
XM_037205437.1	3872	0.63	-1.73	1	0.54	123.99	0.00568	Stx16	syntaxin 16 (Stx16), transcript variant X11, mRNA
XM_028866841.1	7348	0	NaN	NaN	0.09	-730.69	0.00568	Myo18a	myosin XVIIIA (Myo18a), transcript variant X18, mRNA
XM_037202639.1	4859	0.2	243.37	0.0693	0.24	-1065.38	0.00574	Elp1	elongator acetyltransferase complex subunit 1 (Elp1), transcript variant X5, mRNA
XM_028885133.2	6761	0.53	2.42	0.992	0.52	585.14	0.00579	Lrrcc1	leucine rich repeat and coiled-coil centrosomal protein 1 (Lrrcc1), transcript variant X1, mRNA
XM_028877793.2	5739	0.06	1.05	1	0.18	-868.17	0.00579	Garre1	granule associated Rac and RHOG effector 1 (Garre1), transcript variant X4, mRNA
XM_037211027.1	2023	1.68	-1.82	1	36.72	-22.28	0.00579	Serpinb2	serpin family B member 2 (Serpinb2), transcript variant X2, mRNA
XM_028867429.2	4480	0	4.44	NaN	0.17	-726.1	0.00579	Gak	cyclin G associated kinase (Gak), transcript variant X5, mRNA
XM_028891297.2	8244	0.36	-814.29	0.00143	0.2	-512.22	0.00588	Sfmbt1	Scm like with four mbt domains 1 (Sfmbt1), transcript variant X1, mRNA
XM_037196717.1	4826	0.41	-1.22	1	0.46	159.23	0.00599	Ctdsp2	CTD small phosphatase 2 (Ctdsp2), transcript variant X2, mRNA
XM_028889988.2	5832	0.76	1.18	1	0.48	96.26	0.00603	Extl3	exostosin like glycosyltransferase 3 (Extl3), transcript variant X5, mRNA
XM_028878204.2	4774	0.36	-1.75	1	0.95	-410.04	0.00604	Dgke	diacylglycerol kinase epsilon (Dgke), transcript variant X2, mRNA
XM_028885356.2	2404	0.18	-1.44	1	0.49	-141.36	0.00604	Lsm14b	LSM family member 14B (Lsm14b), transcript variant X2, mRNA
XM_037197140.1	4934	0.27	5.23	0.551	0.21	-506.78	0.00606	Sema6a	semaphorin 6A (Sema6a), transcript variant X2, mRNA
XM_028870030.2	8336	127.42	-1.42	0.83	665.74	-12.65	0.00624	Fn1	fibronectin 1 (Fn1), mRNA
XM_028886063.2	6439	0.05	-1.08	1	0.09	-895.78	0.00625	Gapvd1	GTPase activating protein and VPS9 domains 1 (Gapvd1), transcript variant X1, mRNA
XM_028865731.2	4289	0.37	51.29	0.00739	0.3	-539.85	0.00628	Rev1	REV1 DNA directed polymerase (Rev1), transcript variant X4, mRNA
XM_037206935.1	4441	0.34	-452.16	0.0232	0.2	-802.26	0.00628	Ttf2	transcription termination factor 2 (Ttf2), transcript variant X2, mRNA
XM_028892588.2	6851	0.2	373.07	0.0366	0.15	-630.71	0.00628	Thada	THADA armadillo repeat containing (Thada), transcript variant X2, mRNA
XM_028874543.2	7280	0.5	914.35	0.0109	0.66	854.81	0.00631	Slc4a8	solute carrier family 4 member 8 (Slc4a8), transcript variant X1, mRNA
XM_028888332.2	4522	0.14	-125.32	0.0925	0.3	-569.63	0.00632	Ndc1	NDC1 transmembrane nucleoporin (Ndc1), transcript variant X2, mRNA
XM_028870308.2	5502	0.69	1.01	1	0.86	898.74	0.00634	Mysm1	Myb like, SWIRM and MPN domains 1 (Mysm1), transcript variant X4, mRNA
XM_028886762.2	2225	4.14	1.35	1	1.45	550.1	0.00635	Cxxc5	CXXC finger protein 5 (Cxxc5), transcript variant X2, mRNA
XM_037204858.1	2887	0.42	3.11	0.987	0.83	501.99	0.00646	Ppig	peptidylprolyl isomerase G (Ppig), transcript variant X3, mRNA
XM_037200765.1	4482	1.46	1940.37	0.002	0.76	832.05	0.00655	Specc1	sperm antigen with calponin homology and coiled-coil domains 1 (Specc1), transcript variant X3, mRNA
XM_028884068.2	3515	10.22	-1.08	1	34.94	-5.67	0.00655	Aco1	aconitase 1 (Aco1), mRNA
XM_028863586.2	1309	0.91	1.57	1	0.98	-475.24	0.00656	LOC114689204	alpha-2-macroglobulin receptor-associated protein (LOC114689204), mRNA
XM_028877407.2	2355	0.67	1.7	1	2.59	-8.89	0.00668	Ccn2	cellular communication network factor 2 (Ccn2), mRNA
XM_037206646.1	2303	0.77	-3.54	0.685	0.62	-36.25	0.00674	LOC114691716	zinc finger CCCH domain-containing protein 14-like (LOC114691716), mRNA
XM_028858081.2	2803	0.6	-206.89	0.00547	0.73	-597.78	0.00678	Wars1	tryptophanyl-tRNA synthetase 1 (Wars1), transcript variant X3, mRNA
XR_005089959.1	1774	2.81	1.18	1	0.97	59.29	0.00681	LOC119086628	uncharacterized LOC119086628 (LOC119086628), transcript variant X5, ncRNA
XM_028861180.2	4241	0.71	2.7	0.955	0.36	210.61	0.00683	Fbxo30	F-box protein 30 (Fbxo30), transcript variant X2, mRNA
XM_037210673.1	9558	0	NaN	NaN	0.06	-653.37	0.00691	Zfyve26	zinc finger FYVE-type containing 26 (Zfyve26), transcript variant X1, mRNA
XM_037201378.1	4535	1.85	-1.8	1	0.56	-697.48	0.00692	Myo1c	myosin IC (Myo1c), transcript variant X4, mRNA
XM_028862666.2	10818	0.05	-132.93	0.102	0.27	-833.39	0.00693	Akap9	A-kinase anchoring protein 9 (Akap9), transcript variant X9, mRNA
XM_028885809.2	7032	0	NaN	NaN	0.08	-843.46	0.00693	Pitpnm2	phosphatidylinositol transfer protein membrane associated 2 (Pitpnm2), transcript variant X1, mRNA
XM_037202199.1	1867	17.91	-1.05	1	20.44	6.96	0.00702	Lilra5	leukocyte immunoglobulin-like receptor subfamily A member 5 (LOC119087307), mRNA
XM_028867315.2	1455	0.66	1.25	1	3.6	-21.51	0.00707	Spp1	secreted phosphoprotein 1 (Spp1), transcript variant X1, mRNA
XM_028873333.2	5567	0.69	1.97	1	0.86	786.42	0.00713	Strn	striatin (Strn), transcript variant X1, mRNA
XM_037197637.1	4814	2.59	-1.58	0.924	32.7	3.76	0.00719	Csf2rb	colony stimulating factor 2 receptor subunit beta (Csf2rb), transcript variant X3, mRNA
XM_028885098.2	5665	10.25	1.17	1	5.41	10.57	0.00723	Znf217	zinc finger protein 217 (Znf217), transcript variant X2, mRNA
XM_028856553.2	5166	4.68	-1.48	0.636	8.11	3.9	0.00733	Pxn	paxillin (Pxn), transcript variant X1, mRNA
XM_037203622.1	14526	11.14	-1.53	0.461	50.12	4.77	0.00733	LOC114684453	maltase-glucoamylase (LOC114684453), mRNA
XM_028877897.2	7595	0.22	-1.74	1	0.59	819.12	0.00733	Hipk3	homeodomain interacting protein kinase 3 (Hipk3), transcript variant X6, mRNA
XM_028871930.2	3217	4.91	-1.13	1	10.14	-5.73	0.00736	Ext1	exostosin glycosyltransferase 1 (Ext1), mRNA
XM_028862132.2	3328	0.28	-1.07	1	0.32	-158.75	0.0074	Dmtf1	cyclin D binding myb like transcription factor 1 (Dmtf1), transcript variant X4, mRNA
XM_028869987.1	1933	0.44	-1.14	1	0.32	-143.11	0.00753	Ptdss2	phosphatidylserine synthase 2 (Ptdss2), transcript variant X3, mRNA
XM_037209971.1	5093	0.73	-1.15	1	0.8	799.42	0.00753	Ate1	arginyltransferase 1 (Ate1), transcript variant X3, mRNA
XM_028886654.2	7018	0.55	-864.51	0.00666	0.47	566.16	0.00758	Ccdc88c	coiled-coil domain containing 88C (Ccdc88c), transcript variant X3, mRNA
XM_037196827.1	1902	0	NaN	NaN	1.84	720.31	0.00779	Nr1h4	nuclear receptor subfamily 1 group H member 4 (Nr1h4), transcript variant X2, mRNA
XM_028870570.2	4205	0.08	1.05	1	0.12	-773.69	0.00781	Ogdh	oxoglutarate dehydrogenase (Ogdh), transcript variant X6, mRNA
XM_028872032.2	441	0.88	-1.28	1	3.65	-29.3	0.00781	LOC114694924	40S ribosomal protein S17-like (LOC114694924), mRNA
XM_028887252.2	1544	1.04	1.95	1	3.11	-12.85	0.00781	Rhag	Rh associated glycoprotein (Rhag), mRNA
XM_037209465.1	3098	1.93	1.8	1	9.48	8.37	0.00781	Ccdc125	coiled-coil domain containing 125 (Ccdc125), transcript variant X2, mRNA
XM_037197932.1	3085	0.93	-2.12	1	1.29	716.37	0.00782	Adgre4	adhesion G protein-coupled receptor E4 (LOC114684971), transcript variant X3, mRNA
XM_037205687.1	2525	0.06	1.53	1	0.63	-192.68	0.00782	Slc25a48	solute carrier family 25 member 48 (Slc25a48), transcript variant X3, mRNA
XM_028856809.1	3146	0.69	1.88	1	0.58	404.7	0.00792	Ezh1	enhancer of zeste 1 polycomb repressive complex 2 subunit (Ezh1), transcript variant X6, mRNA
XM_028877612.2	2763	0.15	1.1	1	0.37	-539.31	0.00792	Dmtn	dematin actin binding protein (Dmtn), transcript variant X2, mRNA
XM_037205525.1	1221	1.77	675.79	0.0147	1.8	541.42	0.00805	Pkig	cAMP-dependent protein kinase inhibitor gamma (Pkig), transcript variant X2, mRNA
XM_028878588.2	2792	0.2	2.99	0.964	0.4	-68.72	0.00805	Gfra4	GDNF family receptor alpha 4 (Gfra4), mRNA
XM_028870698.2	3829	0.63	-1.4	1	0.38	97.2	0.00805	Patz1	POZ/BTB and AT hook containing zinc finger 1 (Patz1), transcript variant X1, mRNA
XM_028881301.2	4934	0.23	-1.42	1	0.47	543.04	0.00805	Arhgef7	Rho guanine nucleotide exchange factor 7 (Arhgef7), transcript variant X1, mRNA
XM_028886302.2	10944	0.02	-1.03	1	0.12	-376.45	0.00805	Slc16a7	solute carrier family 16 member 7 (Slc16a7), transcript variant X7, mRNA
XM_037197083.1	3227	0.27	-1.39	1	0.52	110.12	0.00805	Relt	RELT TNF receptor (Relt), transcript variant X1, mRNA
XM_028854685.2	5570	0.17	334.59	0.0509	0.37	-52.34	0.0081	Ift140	intraflagellar transport 140 (Ift140), transcript variant X1, mRNA
XM_028861174.2	2349	0.42	5.27	0.832	0.46	-409.42	0.00817	Csnk1g2	casein kinase 1 gamma 2 (Csnk1g2), transcript variant X1, mRNA
XM_028858144.1	4416	0.69	-1.28	1	0.29	-412.07	0.00817	Zmym2	zinc finger MYM-type containing 2 (Zmym2), transcript variant X9, mRNA
XM_028880919.2	5747	0.09	2.02	1	0.08	-730.08	0.00817	Esyt2	extended synaptotagmin 2 (Esyt2), transcript variant X2, mRNA
XM_037203801.1	1546	7.4	-1.82	1	10.95	12.66	0.00817	LOC114686303	cellular nucleic acid-binding protein-like (LOC114686303), mRNA
XM_037208596.1	4067	0.67	-1.16	1	0.3	-115.34	0.00817	Lrp5	LDL receptor related protein 5 (Lrp5), transcript variant X2, mRNA
XM_028879116.2	2832	1.39	1.67	1	5.69	7.01	0.00824	Macir	macrophage immunometabolism regulator (Macir), transcript variant X4, mRNA
XM_028858810.2	2678	0.08	-1.63	1	1.37	590.57	0.00825	Tfip11	tuftelin interacting protein 11 (Tfip11), transcript variant X2, mRNA
XM_028859226.2	1921	0.74	-412.27	0.00918	0.85	-209.14	0.00826	Hnrnpl	heterogeneous nuclear ribonucleoprotein L (Hnrnpl), transcript variant X4, mRNA
XM_028865502.2	5533	0.13	219.78	0.0796	0.51	161.14	0.00826	Zbtb18	zinc finger and BTB domain containing 18 (Zbtb18), transcript variant X1, mRNA
XM_028886066.1	6538	0.69	4.17	0.482	0.49	-36.24	0.00826	Gapvd1	GTPase activating protein and VPS9 domains 1 (Gapvd1), transcript variant X3, mRNA
XM_028878278.1	6223	0.53	4.19	0.611	0.26	-150.14	0.00826	Cltc	clathrin heavy chain (Cltc), transcript variant X2, mRNA
XM_037199413.1	6316	0.75	4.4	0.634	0.25	-703.95	0.00826	Bcor	BCL6 corepressor (Bcor), transcript variant X4, mRNA
XM_037200123.1	5410	0.53	3.55	0.842	0.57	87.47	0.00826	Paqr8	progestin and adipoQ receptor family member 8 (Paqr8), transcript variant X8, mRNA
XM_028857048.2	7382	0.09	3.16	1	0.34	531.38	0.00826	Clock	clock circadian regulator (Clock), transcript variant X3, mRNA
XM_028892193.2	3884	0.25	-1.53	1	6.95	-10.55	0.00826	Mmp14	matrix metallopeptidase 14 (Mmp14), mRNA
XM_037202592.1	4327	0.31	1.36	1	0.16	-95.84	0.00826	Coro2a	coronin 2A (Coro2a), transcript variant X3, mRNA
XM_037208146.1	2340	0.63	-1.08	1	0.78	125.8	0.00826	Pisd	phosphatidylserine decarboxylase (Pisd), transcript variant X6, mRNA
XM_028889425.2	1345	0.04	-4.41	NaN	90.71	-5.35	0.00826	Csf3	colony stimulating factor 3 (Csf3), mRNA
XM_028863995.2	2421	4.04	-276.12	2.62e-08	2.12	-53.13	0.00827	Raf1	Raf-1 proto-oncogene, serine/threonine kinase (Raf1), transcript variant X6, mRNA
XM_037197568.1	2430	0.19	130.09	0.146	0.21	-472.24	0.00827	Znf623	zinc finger protein 623 (Znf623), transcript variant X2, mRNA
XM_037204139.1	3265	4.22	1.23	1	3.62	13.99	0.0084	Cd4	CD4 molecule (Cd4), transcript variant X1, mRNA
XM_028892781.2	1579	0	NaN	NaN	0.77	-498.27	0.0084	Mlkl	mixed lineage kinase domain-like protein (LOC114709118), transcript variant X2, mRNA
XM_037211339.1	2785	1.46	-3.21	0.844	5.71	-17.55	0.0084	Pla2g4a	phospholipase A2 group IVA (Pla2g4a), transcript variant X3, mRNA
XM_028858979.2	5207	0.52	2.67	1	0.27	-440.39	0.00842	Nfrkb	nuclear factor related to kappaB binding protein (Nfrkb), transcript variant X5, mRNA
XM_037205568.1	3118	0.64	-1.64	1	0.75	127.18	0.00843	Stau1	staufen double-stranded RNA binding protein 1 (Stau1), transcript variant X1, mRNA
XM_028859873.2	4654	0.33	1.67	1	0.26	-120.09	0.00844	Axl	AXL receptor tyrosine kinase (Axl), transcript variant X1, mRNA
XM_028862253.2	4859	0.56	1.08	1	0.26	-371.18	0.00844	Tnpo2	transportin 2 (Tnpo2), transcript variant X7, mRNA
XM_037209244.1	3036	1.13	1.42	1	3.93	8.14	0.00844	Gbp6	guanylate-binding protein 6-like (LOC114691793), transcript variant X3, mRNA
XR_005090337.1	1800	1.38	1.89	1	0.93	129.01	0.00844	LOC114707089	uncharacterized LOC114707089 (LOC114707089), transcript variant X2, ncRNA
XM_028874978.2	7655	0.43	1080.08	0.00614	0.08	-248.86	0.00855	Pfkfb2	6-phosphofructo-2-kinase/fructose-2,6-biphosphatase 2 (Pfkfb2), transcript variant X1, mRNA
XR_005093000.1	3540	0.92	-2.22	0.867	2.22	-12.52	0.00856	Slamf8	SLAM family member 8 (Slamf8), transcript variant X1, misc_RNA
XM_028883404.2	1723	0.01	1.79	NaN	25.36	-4.33	0.00856	Serpinb3a	serpin B4-like (LOC114702823), mRNA
XM_037200709.1	6636	9.66	1.2	1	7.15	3.06	0.00859	Ikzf3	IKAROS family zinc finger 3 (Ikzf3), transcript variant X6, mRNA
XM_028871625.2	2509	0.78	1.5	1	0.51	-422.6	0.00861	Osgin2	oxidative stress induced growth inhibitor family member 2 (Osgin2), transcript variant X1, mRNA
XM_037202180.1	3977	22.15	-1.91	1	5.62	10.09	0.00861	Lilrb3	leukocyte immunoglobulin-like receptor subfamily B member 3 (LOC114689347), transcript variant X1, mRNA
XM_037208732.1	5147	0.31	1.47	1	0.2	-88.55	0.00861	Ppfia1	PTPRF interacting protein alpha 1 (Ppfia1), transcript variant X12, mRNA
XM_037211469.1	2149	0.24	-151.1	0.0498	0.7	-402.93	0.00869	LOC114697589	TNF receptor-associated factor 3-like (LOC114697589), mRNA
XM_028883236.2	4013	1.08	-1.37	1	0.86	635.49	0.00876	Zer1	zyg-11 related cell cycle regulator (Zer1), transcript variant X3, mRNA
XM_028874838.2	2401	1.74	-3.84	0.386	2.01	731.31	0.00884	Fyn	FYN proto-oncogene, Src family tyrosine kinase (Fyn), transcript variant X3, mRNA
XM_028854981.2	1349	0.19	1.01	1	2.09	-34.75	0.00885	Sftpd	surfactant protein D (Sftpd), transcript variant X1, mRNA
XM_037197674.1	1408	0.55	1.83	1	0.55	-526.25	0.00886	LOC114694361	DNA dC-_dU-editing enzyme APOBEC3-like (LOC114694361), transcript variant X3, mRNA
XM_028877469.2	2622	0.13	93.57	0.0974	0.78	-645.44	0.00908	Tsku	tsukushi, small leucine rich proteoglycan (Tsku), transcript variant X2, mRNA
XM_028885173.2	2572	1.23	-2.21	1	3.11	11.77	0.00908	Cpne3	copine 3 (Cpne3), transcript variant X3, mRNA
XM_037206697.1	3242	0.51	-1.16	1	0.54	-132.91	0.00908	Arfip1	ADP ribosylation factor interacting protein 1 (Arfip1), transcript variant X5, mRNA
XM_028859914.2	2639	1.48	1.22	1	0.67	107.32	0.00918	Adamts10	ADAM metallopeptidase with thrombospondin type 1 motif 10 (Adamts10), transcript variant X7, mRNA
XM_037208020.1	7639	0.06	1.11	1	0.08	-432.62	0.00922	Golga4	golgin A4 (Golga4), transcript variant X7, mRNA
XM_028865279.2	2068	0	NaN	NaN	0.27	-122.98	0.00926	Map2k6	mitogen-activated protein kinase kinase 6 (Map2k6), transcript variant X2, mRNA
XM_037202327.1	838	51.48	7.97	0.0266	42.29	9.84	0.0093	Laptm5	lysosomal-associated transmembrane protein 5 (LOC114689194), mRNA
XM_037202778.1	1519	2.31	-4.65	0.609	2.04	552.36	0.00934	Lrrc42	leucine rich repeat containing 42 (Lrrc42), transcript variant X4, mRNA
XM_028889017.2	1590	0.45	-237.25	0.0329	0.97	-390.94	0.00935	Raly	RALY heterogeneous nuclear ribonucleoprotein (Raly), transcript variant X1, mRNA
XR_005090015.1	424	9.53	-1.97	0.889	66.09	-5.82	0.00935	LOC119086670	uncharacterized LOC119086670 (LOC119086670), ncRNA
XM_028869508.2	3254	1.49	1.77	0.91	0.75	75.42	0.00935	Dlg4	discs large MAGUK scaffold protein 4 (Dlg4), transcript variant X5, mRNA
XM_037206252.1	3229	0.34	-1.26	1	0.57	65.17	0.00935	Wwp2	WW domain containing E3 ubiquitin protein ligase 2 (Wwp2), transcript variant X2, mRNA
XM_028864102.2	5206	0.99	-2.89	0.977	0.44	-49.06	0.00938	Mindy4	MINDY lysine 48 deubiquitinase 4 (Mindy4), transcript variant X2, mRNA
XM_037201414.1	1446	2.7	1089.94	0.00155	1.48	444.71	0.00944	LOC114688529	deoxycytidine kinase-like (LOC114688529), mRNA
XM_028893135.2	7560	0.59	8.79	0.133	0.13	-316.57	0.00944	Ptprf	protein tyrosine phosphatase receptor type F (Ptprf), transcript variant X7, mRNA
XM_037199747.1	1187	0.98	-3.77	0.956	1.17	-91.41	0.00944	LOC114686366	H-2 class I histocompatibility antigen, L-D alpha chain-like (LOC114686366), transcript variant X5, mRNA
XM_028894350.2	7891	12.21	1.32	0.871	35.51	4.16	0.00947	Gvin1	interferon-induced very large GTPase 1-like (LOC114710250), mRNA
XM_028894761.2	3213	1.14	-1.16	1	0.74	-563.96	0.00948	Rnf38	ring finger protein 38 (Rnf38), transcript variant X8, mRNA
XM_037203557.1	2594	0	NaN	NaN	0.2	-512.65	0.00948	Cd36	CD36 molecule (Cd36), transcript variant X5, mRNA
XM_028891113.1	2758	0	NaN	NaN	0.34	-395.54	0.00956	Lzts2	leucine zipper tumor suppressor 2 (Lzts2), transcript variant X1, mRNA
XR_005089419.1	982	2.61	-1.4	1	1.78	75.38	0.00962	LOC119086193	uncharacterized LOC119086193 (LOC119086193), transcript variant X1, ncRNA
XM_028887568.2	677	13.73	2.39	0.464	23.07	-5.98	0.00963	Fabp4	fatty acid binding protein 4 (Fabp4), mRNA
XM_028894239.2	1056	3.27	1.66	1	13.16	-7.72	0.00963	Prg3	proteoglycan 3, pro eosinophil major basic protein 2 (Prg3), mRNA
XM_028893042.2	5132	0.39	2.83	0.998	0.45	-573.54	0.00988	Foxn2	forkhead box N2 (Foxn2), transcript variant X3, mRNA
XM_028876079.2	3046	0.42	-1.04	1	0.56	341.52	0.00988	Fut8	fucosyltransferase 8 (Fut8), transcript variant X3, mRNA
XM_028871656.2	7480	0.01	35.84	NaN	0.33	54.76	0.00988	Tanc1	tetratricopeptide repeat, ankyrin repeat and coiled-coil containing 1 (Tanc1), transcript variant X3, mRNA
XM_028853564.2	5523	0.83	-1.38	1	0.6	596.34	0.00989	Rptor	regulatory associated protein of MTOR complex 1 (Rptor), transcript variant X3, mRNA
XM_028879433.2	2768	0.45	-2.03	1	0.43	-426.64	0.00992	Zkscan3	zinc finger protein with KRAB and SCAN domains 3 (LOC114699987), transcript variant X8, mRNA
XM_028880269.2	4825	0.07	1.01	1	0.22	-565.54	0.00992	Slc41a2	solute carrier family 41 member 2 (Slc41a2), transcript variant X3, mRNA
XM_028894169.2	5326	0.17	105.48	0.0342	0.24	-364.27	0.00998	Kank1	KN motif and ankyrin repeat domains 1 (Kank1), transcript variant X1, mRNA
XM_028875263.2	16039	0.22	-1.14	1	0.19	483.09	0.01	Ubr4	ubiquitin protein ligase E3 component n-recognin 4 (Ubr4), transcript variant X3, mRNA
XM_028892312.2	2527	1.23	1.1	1	0.75	143.11	0.01	Iffo1	intermediate filament family orphan 1 (Iffo1), transcript variant X6, mRNA
XM_037203943.1	4832	0.14	-87.56	0.138	0.27	-189.12	0.01	Frmd4b	FERM domain containing 4B (Frmd4b), transcript variant X6, mRNA
XM_037206738.1	1028	2.51	-3.63	0.847	2.16	-42.06	0.01	Cd5	CD5 antigen-like (LOC119088183), transcript variant X2, mRNA
XM_037207864.1	1441	9.52	-5.39	0.114	5.24	-13.2	0.0101	Cxadr	coxsackievirus and adenovirus receptor homolog (LOC114693581), transcript variant X4, mRNA
XM_037202568.1	2377	0.05	14.73	0.708	0.36	-103.62	0.0101	Melk	maternal embryonic leucine zipper kinase (Melk), transcript variant X4, mRNA
XM_028889605.2	3413	1.39	-1.26	1	0.37	-675.83	0.0101	Gpbp1l1	GC-rich promoter binding protein 1 like 1 (Gpbp1l1), transcript variant X4, mRNA
XM_028855907.2	1992	0.66	108.43	0.137	0.73	-80.62	0.0102	Kat5	lysine acetyltransferase 5 (Kat5), transcript variant X2, mRNA
XM_037205065.1	7099	7.62	1.52	0.0974	13.83	2.86	0.0102	Hipk3	homeodomain interacting protein kinase 3 (Hipk3), transcript variant X8, mRNA
XM_037200457.1	2053	0.32	1.13	1	0.8	102.4	0.0104	Rgs17	regulator of G protein signaling 17 (Rgs17), transcript variant X6, mRNA
XM_028877895.2	7561	1.09	1.55	1	0.49	-44.38	0.0104	Hipk3	homeodomain interacting protein kinase 3 (Hipk3), transcript variant X3, mRNA
XM_028890487.2	5565	0.05	2.76	1	0.14	-457.91	0.0104	Lars2	leucyl-tRNA synthetase 2, mitochondrial (Lars2), transcript variant X2, mRNA
XM_028875398.2	1286	8.75	-1.89	0.494	47.01	-6.51	0.0104	C1qc	complement C1q C chain (C1qc), mRNA
XM_028861335.2	2068	0.75	-4.94	0.605	0.69	-75.72	0.0104	Gatad2a	GATA zinc finger domain containing 2A (Gatad2a), transcript variant X1, mRNA
XM_028860459.2	5182	0.99	1.85	1	0.41	522.97	0.0104	Agpat3	1-acylglycerol-3-phosphate O-acyltransferase 3 (Agpat3), transcript variant X4, mRNA
XM_028865375.2	2402	2.52	1	1	1.72	673.68	0.0104	Pigb	phosphatidylinositol glycan anchor biosynthesis class B (Pigb), transcript variant X1, mRNA
XM_037199945.1	5127	0.08	1.09	1	0.14	-456.59	0.0104	Agpat3	1-acylglycerol-3-phosphate O-acyltransferase 3 (Agpat3), transcript variant X6, mRNA
XM_037203092.1	4539	0.2	1.01	1	0.58	-687.63	0.0104	Ece1	endothelin converting enzyme 1 (Ece1), transcript variant X4, mRNA
XM_037205347.1	1895	0.05	3.96	NaN	0.5	-439.04	0.0104	Gss	glutathione synthetase (Gss), transcript variant X5, mRNA
XM_028872978.2	4797	0.44	1.19	1	1.03	785.66	0.0105	Arhgap12	Rho GTPase activating protein 12 (Arhgap12), transcript variant X3, mRNA
XM_028873296.2	8120	0.1	16.94	0.199	0.16	-638.52	0.0105	Zdhhc21	zinc finger DHHC-type palmitoyltransferase 21 (Zdhhc21), transcript variant X4, mRNA
XM_037198499.1	4348	0.12	1.06	1	0.16	-588.03	0.0105	Znf655	zinc finger protein 655 (Znf655), transcript variant X1, mRNA
XM_037198726.1	5648	0.04	3.09	1	0.07	-616.66	0.0105	Clip1	CAP-Gly domain containing linker protein 1 (Clip1), transcript variant X16, mRNA
XM_037210952.1	2357	0.07	-43.34	0.226	0.57	-400.82	0.0105	Pigb	phosphatidylinositol glycan anchor biosynthesis class B (Pigb), transcript variant X3, mRNA
XM_037206323.1	1696	0.45	-1.28	1	1.16	-557.03	0.0105	Klhdc4	kelch domain containing 4 (Klhdc4), transcript variant X4, mRNA
XM_028886473.2	3411	52.61	-61.18	5.82e-05	15.42	-30.57	0.0109	Stk17b	serine/threonine kinase 17b (Stk17b), transcript variant X2, mRNA
XM_037203962.1	8025	1.99	-1.04	1	0.4	480.35	0.0109	Dennd5b	DENN domain containing 5B (Dennd5b), transcript variant X2, mRNA
XM_037200342.1	1231	0	NaN	NaN	1.84	58.47	0.011	Il22ra2	interleukin-22 receptor subunit alpha-2 (LOC114686969), transcript variant X1, mRNA
XM_037203868.1	2304	3.41	1.83	0.879	1.77	17.5	0.011	LOC114688544	probable N-acetyltransferase CML1 (LOC114688544), transcript variant X1, mRNA
XM_028886547.2	2023	2.27	-1.01	1	14.63	3.94	0.011	B4galt6	beta-1,4-galactosyltransferase 6 (B4galt6), transcript variant X2, mRNA
XM_028866486.2	5401	0.02	3.37	1	0.09	-112.18	0.011	Cadm1	cell adhesion molecule 1 (Cadm1), transcript variant X6, mRNA
XM_037209407.1	5158	0.04	-3.63	0.889	0.27	-400	0.0111	Osmr	oncostatin M receptor (Osmr), transcript variant X3, mRNA
XM_037202169.1	1660	2.04	-1.02	1	3.06	41.28	0.0111	Lilrb4	leukocyte immunoglobulin-like receptor subfamily B member 4 (LOC114684190), transcript variant X1, mRNA
XM_037201283.1	4413	0.37	63.48	0.00614	0.65	99	0.0111	Map3k3	mitogen-activated protein kinase kinase kinase 3 (Map3k3), transcript variant X2, mRNA
XM_037200182.1	2682	0.22	3.6	0.923	0.17	-61.25	0.0111	LOC114682643	tripartite motif-containing protein 15 (LOC114682643), transcript variant X3, mRNA
XM_037202182.1	3392	1.22	11.55	0.102	0.55	-374.82	0.0111	Lilrb3	leukocyte immunoglobulin-like receptor subfamily B member 3 (LOC114689347), transcript variant X3, mRNA
XM_028873541.2	8331	3.93	1.42	0.964	3.39	5.5	0.0112	Tep1	telomerase associated protein 1 (Tep1), transcript variant X1, mRNA
XM_028876766.2	1775	3.09	2.14	0.993	0.92	381.5	0.0112	Smyd2	SET and MYND domain containing 2 (Smyd2), transcript variant X3, mRNA
XM_028865218.2	11645	0.12	-1.25	1	0.13	110.49	0.0112	Bptf	bromodomain PHD finger transcription factor (Bptf), transcript variant X7, mRNA
XM_028867841.2	3005	0.58	1.33	1	0.25	-345.26	0.0112	Polr3e	RNA polymerase III subunit E (Polr3e), transcript variant X4, mRNA
XM_028894616.2	7992	0.7	1.3	1	0.46	592.55	0.0112	Kiaa2026	KIAA2026 ortholog (Kiaa2026), transcript variant X2, mRNA
XM_037211703.1	4618	0.19	2.03	1	0.24	-312.81	0.0112	Tlr3	toll like receptor 3 (Tlr3), transcript variant X5, mRNA
XR_005089733.1	1381	0.05	-1.07	NaN	0.46	-38.22	0.0112	LOC114681616	elongation factor 1-gamma-like (LOC114681616), misc_RNA
XM_028879608.2	3000	0.21	-127.17	0.0666	0.23	-373.74	0.0113	Repin1	replication initiator 1 (Repin1), transcript variant X2, mRNA
XM_028856043.2	4223	0.13	-1.36	1	0.16	-561.09	0.0113	Sun1	Sad1 and UNC84 domain containing 1 (Sun1), transcript variant X3, mRNA
XM_028860088.2	1395	1.16	1.86	1	4.7	909.1	0.0113	LOC114685424	intelectin-1a (LOC114685424), mRNA
XM_037201477.1	3276	0.09	-1.09	1	0.67	22.54	0.0113	Ccdc154	coiled-coil domain containing 154 (Ccdc154), transcript variant X4, mRNA
XM_037200086.1	3635	0.24	2.11	1	0.44	317.11	0.0115	Bag6	BAG cochaperone 6 (Bag6), transcript variant X22, mRNA
XM_028857209.2	1782	0.33	-166.27	0.0387	0.84	72.5	0.0115	Clk4	CDC like kinase 4 (Clk4), transcript variant X7, mRNA
XM_037204165.1	4700	0.12	1.43	1	0.25	-312.59	0.0115	Foxj2	forkhead box J2 (Foxj2), transcript variant X1, mRNA
XM_037206618.1	6950	0	NaN	NaN	0.06	-484.47	0.0115	Med12l	mediator complex subunit 12L (Med12l), transcript variant X10, mRNA
XM_037198420.1	4003	1.14	-1.2	1	0.56	418.97	0.0116	Evi5l	ecotropic viral integration site 5 like (Evi5l), transcript variant X1, mRNA
XM_028863905.2	1635	0	NaN	NaN	0.4	-550.31	0.0116	Mtmr14	myotubularin related protein 14 (Mtmr14), transcript variant X5, mRNA
XM_028879612.2	472	0.72	-1.05	1	1.37	-80.6	0.0117	LOC114700106	histone H2A type 1-B (LOC114700106), mRNA
XM_037207862.1	1497	3.48	-15.67	0.00776	1.65	-20.68	0.0118	Cxadr	coxsackievirus and adenovirus receptor homolog (LOC114693581), transcript variant X2, mRNA
XM_028855039.2	2919	0.37	1.01	1	0.84	489.96	0.0118	Akt2	AKT serine/threonine kinase 2 (Akt2), transcript variant X2, mRNA
XM_028855893.2	3071	0.92	1.18	1	0.72	178.1	0.0118	Slc27a1	solute carrier family 27 member 1 (Slc27a1), transcript variant X2, mRNA
XM_028861256.2	12415	0.06	1.09	1	0.03	-581.76	0.0118	Utrn	utrophin (Utrn), transcript variant X7, mRNA
XM_028864662.2	9321	0.66	3.29	0.711	0.2	343.35	0.0119	Ldlrad4	low density lipoprotein receptor class A domain containing 4 (Ldlrad4), transcript variant X1, mRNA
XM_028890885.2	3534	0.42	361.01	0.0168	0.11	-449.96	0.012	Ubap2l	ubiquitin associated protein 2 like (Ubap2l), transcript variant X32, mRNA
XM_037197417.1	6362	0.15	230.18	0.0766	0.06	-459.72	0.012	Gxylt1	glucoside xylosyltransferase 1 (Gxylt1), transcript variant X2, mRNA
XM_028887853.2	3697	0.68	-1.06	1	0.64	460.86	0.012	Slc35d1	solute carrier family 35 member D1 (Slc35d1), transcript variant X3, mRNA
XM_028860707.2	1561	0.01	4.11	NaN	0.33	-76.07	0.012	Cers4	ceramide synthase 4 (Cers4), transcript variant X2, mRNA
XM_037197721.1	1887	0.84	-2.18	1	0.32	-117.51	0.012	Cpq	carboxypeptidase Q (Cpq), transcript variant X2, mRNA
XM_028860734.2	1880	0.58	1.36	1	2.39	-15.71	0.0121	LOC114686101	p53 apoptosis effector related to PMP22 (LOC114686101), mRNA
XM_028880006.2	7912	0.36	-830.11	0.00792	0.28	416.81	0.0121	Rapgef6	Rap guanine nucleotide exchange factor 6 (Rapgef6), transcript variant X9, mRNA
XM_028875586.2	3712	1.82	-1.5	1	7.34	-6	0.0121	Fmnl2	formin like 2 (Fmnl2), transcript variant X6, mRNA
XM_028881047.2	5318	0.06	88.63	0.102	0.23	-89.31	0.0122	Nek1	NIMA related kinase 1 (Nek1), transcript variant X5, mRNA
XM_037210808.1	6053	0.51	1.05	1	0.63	721.88	0.0122	Dicer1	dicer 1, ribonuclease III (Dicer1), transcript variant X4, mRNA
XM_028882593.2	3175	0.24	-2.71	1	0.63	419.52	0.0122	Ubtf	upstream binding transcription factor (Ubtf), transcript variant X7, mRNA
XM_028882590.2	3091	0.69	-720.07	0.0133	0.44	-554.99	0.0123	Ubtf	upstream binding transcription factor (Ubtf), transcript variant X4, mRNA
XM_028860837.2	2743	0.97	-1.97	0.992	0.44	61.08	0.0123	Reps1	RALBP1 associated Eps domain containing 1 (Reps1), transcript variant X2, mRNA
XM_037203793.1	4247	0.12	1.11	1	0.15	-416.51	0.0123	Gng12	G protein subunit gamma 12 (Gng12), transcript variant X2, mRNA
XR_005090796.1	1248	1.84	1.42	1	3.78	28.13	0.0123	LOC119087379	uncharacterized LOC119087379 (LOC119087379), transcript variant X1, ncRNA
XM_028867093.2	3870	0.29	1.71	1	0.49	-490.68	0.0125	Sap130	Sin3A associated protein 130 (Sap130), transcript variant X8, mRNA
XM_028890140.2	6312	0.68	3.57	0.898	0.3	405.91	0.0126	Ndst1	N-deacetylase and N-sulfotransferase 1 (Ndst1), transcript variant X4, mRNA
XM_028883625.2	1381	2.75	1.9	0.982	1.47	406.46	0.0127	Gzmk	granzyme K (Gzmk), transcript variant X1, mRNA
XM_028874044.2	1880	0.78	1.66	1	0.53	-42.79	0.0128	Taf1d	TATA-box binding protein associated factor, RNA polymerase I subunit D (Taf1d), transcript variant X1, mRNA
XM_028861289.2	3749	0.16	-188.15	0.0536	0.14	-338.27	0.0128	Plagl1	PLAG1 like zinc finger 1 (Plagl1), transcript variant X7, mRNA
XM_028892780.2	2212	0.05	1.24	1	0.56	-386.8	0.0129	LOC114709118	mixed lineage kinase domain-like protein (LOC114709118), transcript variant X1, mRNA
XM_037211140.1	4395	0.2	-1.75	1	0.54	58.84	0.013	Angel2	angel homolog 2 (Angel2), transcript variant X5, mRNA
XM_028873728.2	4902	3.94	-1.52	0.861	18.17	4.14	0.013	Anpep	alanyl aminopeptidase, membrane (LOC114696172), mRNA
XM_037204310.1	907	74.06	-1.12	1	58.69	-2.66	0.013	LOC119087722	uncharacterized LOC119087722 (LOC119087722), mRNA
XM_028884260.2	3346	0	NaN	NaN	0.51	-378.42	0.013	Cpsf7	cleavage and polyadenylation specific factor 7 (Cpsf7), transcript variant X5, mRNA
XM_028888903.2	7954	2.07	1.25	1	0.84	11.25	0.013	Cep250	centrosomal protein 250 (Cep250), transcript variant X3, mRNA
XM_028888771.2	4086	2.57	1.57	1	0.64	444.84	0.013	Zfp62	ZFP62 zinc finger protein (Zfp62), transcript variant X1, mRNA
XR_003733485.2	193	0.24	1.01	NaN	13.2	-22.22	0.0131	LOC114685689	uncharacterized LOC114685689 (LOC114685689), ncRNA
XM_028880778.2	1108	0.1	1.44	1	2.16	417.11	0.0131	LOC114700934	bile salt sulfotransferase-like (LOC114700934), transcript variant X2, mRNA
XM_037200084.1	3638	0.43	2.25	1	0.42	307.87	0.0132	Bag6	BAG cochaperone 6 (Bag6), transcript variant X20, mRNA
XM_037208414.1	1601	3.69	1.19	1	1.37	379.99	0.0133	Pdlim2	PDZ and LIM domain 2 (Pdlim2), transcript variant X2, mRNA
XM_028876536.2	3158	3.89	-1.17	1	3.81	-5.55	0.0133	Tmcc2	transmembrane and coiled-coil domain family 2 (Tmcc2), transcript variant X3, mRNA
XM_028864419.2	2564	0.04	3.98	NaN	0.25	-397.59	0.0133	Scyl3	SCY1 like pseudokinase 3 (Scyl3), transcript variant X4, mRNA
XM_028861297.2	3781	0.1	4.97	0.846	0.35	-186.12	0.0134	Plagl1	PLAG1 like zinc finger 1 (Plagl1), transcript variant X6, mRNA
XM_037209820.1	4048	2.75	1.84	0.932	0.97	672.89	0.0135	St6gal1	ST6 beta-galactoside alpha-2,6-sialyltransferase 1 (St6gal1), transcript variant X7, mRNA
XM_028883738.1	2414	0.04	-3.64	NaN	0.16	-411.77	0.0138	Klc1	kinesin light chain 1 (Klc1), transcript variant X12, mRNA
XM_028873435.2	3715	0.04	-3.62	1	0.94	-59.83	0.0138	Picalm	phosphatidylinositol binding clathrin assembly protein (Picalm), transcript variant X13, mRNA
XM_028891066.2	4638	0.55	1.22	1	0.4	328.21	0.0139	Znf23	zinc finger protein 23 (Znf23), transcript variant X2, mRNA
XM_028866921.2	11057	0	NaN	NaN	0.03	-503.19	0.014	Nf1	neurofibromin 1 (Nf1), transcript variant X4, mRNA
XM_037201217.1	5028	0.57	-1.78	1	0.43	-30.04	0.014	Tex2	testis expressed 2 (Tex2), transcript variant X2, mRNA
XM_028871479.2	407	1.7	-1.04	1	528.96	-6.08	0.0141	Mt2	metallothionein-2 (LOC114694511), mRNA
XM_037209902.1	5834	0.21	-1.12	1	0.58	552.54	0.0141	Yeats2	YEATS domain containing 2 (Yeats2), transcript variant X6, mRNA
XM_028880068.2	5121	0.22	303.34	0.05	0.21	-342.74	0.0143	Arhgap29	Rho GTPase activating protein 29 (Arhgap29), transcript variant X1, mRNA
XM_028874489.2	2205	0.88	1.02	1	0.48	-548.15	0.0143	Csad	cysteine sulfinic acid decarboxylase (Csad), transcript variant X4, mRNA
XM_028890777.2	5488	0.8	-1.27	1	0.78	631.08	0.0144	Atp8b2	ATPase phospholipid transporting 8B2 (Atp8b2), transcript variant X1, mRNA
XR_005090428.1	3427	1.85	1.12	1	6.03	4.48	0.0144	LOC119087011	uncharacterized LOC119087011 (LOC119087011), ncRNA
XM_028864642.2	480	0.03	2.29	NaN	1.14	-65.1	0.0144	LOC114690132	60S ribosomal protein L23-like (LOC114690132), mRNA
XM_037198330.1	2222	0.31	213.58	0.0824	0.5	-546.45	0.0145	Lrch4	leucine rich repeats and calponin homology domain containing 4 (Lrch4), transcript variant X3, mRNA
XM_028882006.2	2124	12.85	-1.38	0.896	86.02	3.27	0.0145	Dhrs9	dehydrogenase/reductase 9 (Dhrs9), mRNA
XM_028862250.2	4889	0.36	2.09	1	0.2	-286.31	0.0145	Tnpo2	transportin 2 (Tnpo2), transcript variant X4, mRNA
XM_028860313.2	4522	0.01	5.02	NaN	0.86	37.68	0.0145	Tmem181	transmembrane protein 181 (Tmem181), transcript variant X2, mRNA
XM_037200078.1	3773	0.52	-11.31	0.11	0.36	321.34	0.0146	Bag6	BAG cochaperone 6 (Bag6), transcript variant X12, mRNA
XM_028859838.2	3987	0.09	92.1	0.115	0.45	465.8	0.0147	Dcun1d4	defective in cullin neddylation 1 domain containing 4 (Dcun1d4), transcript variant X4, mRNA
XM_028854723.2	2977	0.43	-1.4	1	0.85	178.25	0.0149	Csrnp1	cysteine and serine rich nuclear protein 1 (Csrnp1), transcript variant X6, mRNA
XM_028882249.2	4920	0.08	-3.42	1	0.24	-157.17	0.0149	Rbm47	RNA binding motif protein 47 (Rbm47), transcript variant X9, mRNA
XM_028879801.2	3362	0.03	4.08	NaN	0.23	-87.84	0.0149	Ptpn4	protein tyrosine phosphatase non-receptor type 4 (Ptpn4), transcript variant X5, mRNA
XM_028863360.2	1815	0.27	1.38	1	8.54	-24.53	0.0149	Slc25a48	solute carrier family 25 member 48 (Slc25a48), transcript variant X2, mRNA
XM_028855894.2	3020	0.12	129.84	0.0838	0.37	-327.54	0.0149	Slc27a1	solute carrier family 27 member 1 (Slc27a1), transcript variant X4, mRNA
XM_028859159.2	2815	3.79	-1.08	1	8.65	-4.8	0.0149	Pak4	p21 (RAC1) activated kinase 4 (Pak4), transcript variant X1, mRNA
XM_037197107.1	2764	0.84	1.03	1	0.6	404.06	0.0149	Relt	RELT TNF receptor (Relt), transcript variant X9, mRNA
XM_037209117.1	1912	0.3	-3.6	1	0.95	-43.86	0.0149	Paics	phosphoribosylaminoimidazole carboxylase and phosphoribosylaminoimidazolesuccinocarboxamide synthase (Paics), transcript variant X3, mRNA
XM_037211639.1	6471	0.06	-2.25	1	0.05	-99.09	0.015	Ank1	ankyrin 1 (Ank1), transcript variant X13, mRNA
XM_028862184.2	3900	0.17	-42.35	0.0355	0.08	-468.27	0.015	LOC114687570	phosphatidylcholine translocator ABCB4 (LOC114687570), transcript variant X3, mRNA
XM_028860138.2	4546	0.18	3.72	0.995	0.6	490.87	0.0151	Mfn2	mitofusin 2 (Mfn2), transcript variant X2, mRNA
XM_028854131.2	5363	0.51	3.56	0.695	0.38	433.12	0.0152	Kdm6a	lysine demethylase 6A (Kdm6a), transcript variant X10, mRNA
XR_005091541.1	2613	0.13	-1.86	1	1.14	11.84	0.0152	LOC119087991	uncharacterized LOC119087991 (LOC119087991), ncRNA
XM_028888978.2	7032	0.36	761.51	0.00407	0.23	-446.06	0.0152	Ncoa6	nuclear receptor coactivator 6 (Ncoa6), transcript variant X4, mRNA
XM_028863800.2	4714	0.26	-3.64	0.771	0.37	65.44	0.0152	Sema4d	semaphorin 4D (Sema4d), transcript variant X3, mRNA
XM_028874737.2	2984	13.9	-2.42	0.787	216.52	-20.28	0.0152	Prg4	proteoglycan 4 (Prg4), transcript variant X1, mRNA
XM_028855163.2	2323	0.73	-3.31	0.838	0.74	132.57	0.0152	Elmod3	ELMO domain containing 3 (Elmod3), transcript variant X2, mRNA
XM_028874478.2	6724	0.55	-2.53	0.898	0.57	585.74	0.0152	Espl1	extra spindle pole bodies like 1, separase (Espl1), transcript variant X1, mRNA
XM_028881295.2	5861	2.88	-1.22	1	14.51	3.08	0.0152	Atp11a	ATPase phospholipid transporting 11A (Atp11a), transcript variant X8, mRNA
XM_028889803.2	1991	1.47	-1.87	1	0.46	-132.43	0.0152	Agt	angiotensinogen (Agt), transcript variant X1, mRNA
XM_037207448.1	12083	0.03	1.01	1	0.03	-383.02	0.0152	Myo9a	myosin IXA (Myo9a), transcript variant X3, mRNA
XM_028889445.2	3012	0.94	-3.61	0.867	1.43	44.88	0.0153	Wipf2	WAS/WASL interacting protein family member 2 (Wipf2), transcript variant X2, mRNA
XM_028890439.2	4919	0.74	1.02	1	0.58	503.54	0.0153	Snrk	SNF related kinase (Snrk), transcript variant X2, mRNA
XM_037205710.1	2828	0.13	-18.2	0.151	0.1	-314.78	0.0153	Tspan17	tetraspanin 17 (Tspan17), transcript variant X2, mRNA
XM_037206959.1	2807	0.35	2.26	1	0.28	-112.65	0.0154	Phtf1	putative homeodomain transcription factor 1 (Phtf1), transcript variant X5, mRNA
XM_028877127.2	7038	0.51	2.69	0.993	0.43	577.11	0.0156	Synj1	synaptojanin 1 (Synj1), transcript variant X7, mRNA
XR_005090261.1	1132	1.63	1.13	1	28.09	4.68	0.0157	LOC119086876	uncharacterized LOC119086876 (LOC119086876), ncRNA
XM_028878190.2	2663	7.08	1.28	1	71.11	-6.78	0.0157	Epx	eosinophil peroxidase (Epx), mRNA
XM_037197787.1	10356	0.14	511.2	0.00876	0.09	-295.19	0.0157	Trps1	transcriptional repressor GATA binding 1 (Trps1), transcript variant X1, mRNA
XM_028875703.2	1918	1.46	1.18	1	0.95	79.41	0.0157	Cenpn	centromere protein N (Cenpn), transcript variant X4, mRNA
XM_028878161.2	3621	5.49	1.05	1	17.56	4.37	0.0157	Lcp1	lymphocyte cytosolic protein 1 (Lcp1), transcript variant X1, mRNA
XM_037200656.1	2563	27.24	1.25	1	29.55	5.55	0.0157	Tcf7	transcription factor 7 (Tcf7), transcript variant X3, mRNA
XM_037197252.1	2034	2.68	-699.48	0.000487	1.09	405.16	0.0159	Dgat2	diacylglycerol O-acyltransferase 2 (Dgat2), transcript variant X3, mRNA
XM_037199301.1	3940	0.84	-1.05	1	1	588.54	0.0159	Wdr44	WD repeat domain 44 (Wdr44), transcript variant X2, mRNA
XM_037200628.1	5475	0.42	-4.41	0.709	0.26	110.68	0.0159	Tsc2	TSC complex subunit 2 (Tsc2), transcript variant X17, mRNA
XM_028874127.2	1979	3.59	1.75	0.917	4.54	-5.15	0.0159	Mff	mitochondrial fission factor (Mff), transcript variant X4, mRNA
XM_037208393.1	5713	3.36	1.07	1	5.21	4.08	0.0159	Clcf1	cardiotrophin like cytokine factor 1 (Clcf1), transcript variant X2, mRNA
XM_028886991.2	5339	0.23	-249.18	0.0359	0.17	-258.66	0.0159	Dag1	dystroglycan 1 (Dag1), transcript variant X6, mRNA
XM_028883671.2	5523	0.54	-2.29	1	0.34	138.52	0.016	Pacs2	phosphofurin acidic cluster sorting protein 2 (Pacs2), transcript variant X7, mRNA
XM_028868544.2	3647	0.38	-141.66	0.0158	0.39	-434.42	0.0161	Sulf2	sulfatase 2 (Sulf2), transcript variant X5, mRNA
XM_037208354.1	10776	0.47	4.68	0.549	0.15	367.55	0.0161	Klf12	Kruppel like factor 12 (Klf12), transcript variant X5, mRNA
XM_028887840.2	6093	0.07	1.26	1	0.12	-72.95	0.0161	Nrp1	neuropilin 1 (Nrp1), transcript variant X4, mRNA
XM_028893930.2	1981	0.48	1.59	1	0.32	-369.48	0.0161	Manea	mannosidase endo-alpha (Manea), transcript variant X2, mRNA
XM_037208988.1	3768	1.78	-1.38	1	0.91	635.96	0.0161	Ikzf1	IKAROS family zinc finger 1 (Ikzf1), transcript variant X19, mRNA
XM_028859345.2	6654	0.16	-267.31	0.0326	0.24	294.52	0.0162	Magi3	membrane associated guanylate kinase, WW and PDZ domain containing 3 (Magi3), transcript variant X2, mRNA
XM_037199448.1	5054	0.18	-85.02	0.0429	0.11	-274.24	0.0162	Pcyt1b	phosphate cytidylyltransferase 1, choline, beta (Pcyt1b), transcript variant X1, mRNA
XM_037207758.1	8853	0	NaN	NaN	0.03	-442.07	0.0162	Amotl1	angiomotin like 1 (Amotl1), transcript variant X2, mRNA
XM_037210243.1	1810	0.02	4.73	NaN	0.16	-442.07	0.0162	Hsd3b7	hydroxy-delta-5-steroid dehydrogenase, 3 beta- and steroid delta-isomerase 7 (Hsd3b7), transcript variant X3, mRNA
XM_028858614.2	915	0.7	-1.91	1	8.8	-18.43	0.0163	Elane	elastase, neutrophil expressed (Elane), mRNA
XM_037206499.1	3728	0.25	1.12	1	0.42	72.08	0.0163	Hltf	helicase like transcription factor (Hltf), transcript variant X4, mRNA
XM_028858142.2	5010	0.68	-1.6	1	0.34	287.28	0.0164	Zmym2	zinc finger MYM-type containing 2 (Zmym2), transcript variant X7, mRNA
XM_028868231.2	4581	0.43	-1.31	1	0.13	-364.35	0.0164	Farp1	FERM, ARH/RhoGEF and pleckstrin domain protein 1 (Farp1), transcript variant X3, mRNA
XM_028880673.2	7309	0.34	1.67	1	0.57	835.15	0.0164	LOC114700863	protein DDI1 homolog 2 (LOC114700863), transcript variant X1, mRNA
XM_028894512.2	1426	8.63	-1.15	1	30.62	-4.62	0.0164	Rcl1	RNA terminal phosphate cyclase like 1 (Rcl1), mRNA
XM_037211285.1	766	66.97	2.57	0.47	12.67	-12.55	0.0164	Ftl1	ferritin light chain 1; ferritin light chain 1-like (LOC114703704), mRNA
XM_028855832.2	5286	0.08	-92.45	0.0734	0.13	-450.69	0.0165	Zscan20	zinc finger and SCAN domain containing 20 (Zscan20), transcript variant X2, mRNA
XM_037209302.1	2250	0.32	205.39	0.0745	0.25	-277.53	0.0165	Idua	alpha-L-iduronidase (Idua), transcript variant X9, mRNA
XM_028884744.2	2896	1.26	-1.1	1	1.35	-424.12	0.0165	Ttc16	tetratricopeptide repeat domain 16 (Ttc16), transcript variant X1, mRNA
XM_028877297.2	4358	5.22	-1.04	1	4.05	4.06	0.0165	Cd101	CD101 molecule (Cd101), mRNA
XM_037199476.1	4975	0.44	-1.34	1	0.26	91.26	0.0167	Abcc10	ATP binding cassette subfamily C member 10 (Abcc10), transcript variant X1, mRNA
XM_037207614.1	3454	0.28	-1.11	1	0.35	88.13	0.0167	Ccdc15	coiled-coil domain containing 15 (Ccdc15), transcript variant X3, mRNA
XM_037207353.1	4249	0.82	1.63	1	0.78	582.66	0.0167	Znf280d	zinc finger protein 280D (Znf280d), transcript variant X2, mRNA
XM_037206150.1	1997	20.6	2.78	0.643	5.14	12.56	0.0168	Stx3	syntaxin-3 (LOC114689148), mRNA
XM_028879647.2	438	0	NaN	NaN	0.63	-424.6	0.0168	LOC114700141	histone H2B type 1-C/E/F/G/I-like (LOC114700141), mRNA
XM_037210225.1	7638	0.01	3.79	NaN	0.04	-424.6	0.0168	Dock10	dedicator of cytokinesis 10 (Dock10), transcript variant X3, mRNA
XM_028854672.2	5167	0.16	-13.08	0.357	0.4	478.43	0.0168	Capn15	calpain 15 (Capn15), transcript variant X1, mRNA
XM_037197216.1	3216	0	NaN	NaN	0.19	-277.15	0.0168	Kcng2	potassium voltage-gated channel modifier subfamily G member 2 (Kcng2), transcript variant X3, mRNA
XM_037205935.1	4214	1.42	1.5	1	1.41	13.89	0.017	Ero1b	endoplasmic reticulum oxidoreductase 1 beta (Ero1b), transcript variant X2, mRNA
XM_028863373.2	1586	0.26	3.52	0.927	3.69	-19.06	0.0171	Cxcl14	C-X-C motif chemokine ligand 14 (Cxcl14), mRNA
XM_028886070.2	4375	0.8	-30.38	0.0252	0.42	62.4	0.0171	Gapvd1	GTPase activating protein and VPS9 domains 1 (Gapvd1), transcript variant X7, mRNA
XM_037199060.1	1477	1.6	3.02	0.794	1.08	340.41	0.0171	Arr3	arrestin 3 (Arr3), transcript variant X4, mRNA
XM_028879085.2	6270	1.58	-1.62	0.893	3.46	4	0.0171	Slco4c1	solute carrier organic anion transporter family member 4C1 (Slco4c1), mRNA
XM_037208881.1	3319	0.3	1.12	1	0.42	-412.86	0.0171	Tbc1d14	TBC1 domain family member 14 (Tbc1d14), transcript variant X2, mRNA
XM_037202728.1	2621	0	NaN	NaN	0.11	-287.41	0.0171	LOC114688539	zinc finger protein 54-like (LOC114688539), transcript variant X3, mRNA
XM_037209503.1	7213	0.2	-435.37	0.0116	0.23	-473.24	0.0172	Zfyve16	zinc finger FYVE-type containing 16 (Zfyve16), transcript variant X5, mRNA
XM_037207112.1	2354	0.41	-36.75	0.0436	0.48	-79.16	0.0172	Papss1	3'-phosphoadenosine 5'-phosphosulfate synthase 1 (Papss1), transcript variant X2, mRNA
XM_028869642.2	6689	0	NaN	NaN	0.04	-415.86	0.0172	Cpsf6	cleavage and polyadenylation specific factor 6 (Cpsf6), transcript variant X3, mRNA
XM_028859161.2	2895	0.16	-2.05	1	0.39	-127.96	0.0172	Pak4	p21 (RAC1) activated kinase 4 (Pak4), transcript variant X2, mRNA
XM_037203869.1	2274	0.09	64.22	0.155	0.16	-43.84	0.0173	LOC114688544	probable N-acetyltransferase CML1 (LOC114688544), transcript variant X2, mRNA
XM_028885092.2	330	1.46	-1.7	1	2.42	-96.96	0.0173	Atp5mpl	ATP synthase subunit ATP5MPL, mitochondrial (LOC114704027), mRNA
XM_037206097.1	6471	0.24	-2.16	1	0.88	8.52	0.0173	Nlrc5	NLR family CARD domain containing 5 (Nlrc5), transcript variant X6, mRNA
XM_037198053.1	4265	0.21	-292.72	0.0248	0.09	-277.18	0.0173	Lclat1	lysocardiolipin acyltransferase 1 (Lclat1), transcript variant X5, mRNA
XM_028892329.2	2633	11.78	1.08	1	12.44	4.03	0.0173	Vamp1	vesicle associated membrane protein 1 (Vamp1), mRNA
XM_037202090.1	3207	1.74	1.35	1	2.98	8.43	0.0173	Znf274	zinc finger protein 274 (Znf274), transcript variant X3, mRNA
XR_005091607.1	1618	0.08	7.2	0.64	0.54	-45.79	0.0173	LOC119088041	uncharacterized LOC119088041 (LOC119088041), transcript variant X1, ncRNA
XM_028878543.2	4064	54.8	-1.52	0.199	73.54	3.54	0.0173	Sirpa	signal regulatory protein alpha (Sirpa), transcript variant X3, mRNA
XM_037210879.1	4877	0.81	1.1	1	0.33	284.43	0.0175	Tdrd9	tudor domain containing 9 (Tdrd9), transcript variant X1, mRNA
XM_028879574.2	1507	10.19	1.02	1	40.81	-5.01	0.0175	Tmem176b	transmembrane protein 176B (Tmem176b), transcript variant X1, mRNA
XM_028863912.2	5338	0.5	1.96	1	0.55	566.72	0.0176	Brpf1	bromodomain and PHD finger containing 1 (Brpf1), transcript variant X7, mRNA
XM_037202367.1	1161	0.15	1.23	1	0.23	-407.12	0.0176	LOC114704125	carbonic anhydrase 1 (LOC114704125), transcript variant X3, mRNA
XM_037203797.1	4137	0.03	3.34	1	0.06	-407.12	0.0176	Gng12	G protein subunit gamma 12 (Gng12), transcript variant X6, mRNA
XM_028890569.2	4336	0	NaN	NaN	0.11	-97.63	0.0176	Synrg	synergin gamma (Synrg), transcript variant X4, mRNA
XM_037204496.1	5845	0.47	-4	0.516	0.4	465.98	0.0177	Znf217	zinc finger protein 217 (Znf217), transcript variant X4, mRNA
XM_037202302.1	476	1.67	1.03	1	3.31	-400.14	0.0177	LOC114683462	elongin-C-like (LOC114683462), mRNA
XM_037204458.1	873	0.16	-1.1	1	0.36	-55.48	0.0177	LOC114703583	60S ribosomal protein L6-like (LOC114703583), mRNA
XM_028875825.2	1413	0.16	1.66	1	4.62	-13.04	0.0178	Adm	adrenomedullin (Adm), mRNA
XM_028886465.2	10488	0.05	1.25	1	0.24	417.9	0.0178	Hivep3	HIVEP zinc finger 3 (Hivep3), transcript variant X4, mRNA
XM_037201566.1	1987	0.56	-105.59	0.0158	0.3	-555.38	0.0179	Smg9	SMG9 nonsense mediated mRNA decay factor (Smg9), transcript variant X1, mRNA
XM_028863339.2	4333	0.63	-778.54	0.00421	0.1	-66.71	0.0179	Smad5	SMAD family member 5 (Smad5), transcript variant X3, mRNA
XM_028869849.2	3349	0.16	43.21	0.104	0.37	-334.86	0.018	Mios	meiosis regulator for oocyte development (Mios), transcript variant X2, mRNA
XM_037207090.1	1212	0.3	-1.98	1	0.21	-398.39	0.0182	Casp6	caspase 6 (Casp6), transcript variant X2, mRNA
XM_028891565.2	6771	0.52	1.26	1	0.26	102.41	0.0183	Znf518b	zinc finger protein 518B (Znf518b), transcript variant X1, mRNA
XM_037203728.1	2788	1.04	1.99	1	0.68	51.56	0.0183	Agap3	ArfGAP with GTPase domain, ankyrin repeat and PH domain 3 (Agap3), transcript variant X2, mRNA
XM_028869145.1	4444	0.38	194.35	0.00855	0.19	-234.81	0.0183	Ebf3	EBF transcription factor 3 (Ebf3), transcript variant X9, mRNA
XM_028879573.2	1097	11.28	-1.29	1	39.87	-4.59	0.0184	Tmem176a	transmembrane protein 176A (Tmem176a), mRNA
XM_028882526.2	3822	0.57	-2.3	1	0.19	-304.67	0.0184	Tbc1d5	TBC1 domain family member 5 (Tbc1d5), transcript variant X19, mRNA
XM_028858143.1	4432	1.01	-80.46	0.00174	0.58	557.56	0.0185	Zmym2	zinc finger MYM-type containing 2 (Zmym2), transcript variant X8, mRNA
XM_037206094.1	7256	0.16	1.95	1	0.32	432.57	0.0185	Nlrc5	NLR family CARD domain containing 5 (Nlrc5), transcript variant X2, mRNA
XM_028859508.2	4005	0.65	-5.07	0.528	0.21	-371.51	0.0185	Zmynd11	zinc finger MYND-type containing 11 (Zmynd11), transcript variant X2, mRNA
XM_028882072.2	3896	0	-4.1	NaN	0.17	-37.71	0.0186	Bdkrb2	bradykinin receptor B2 (Bdkrb2), mRNA
XM_037204226.1	5970	0.84	1.73	1	0.53	18.51	0.0186	Ankrd30a	ankyrin repeat domain 30A (Ankrd30a), transcript variant X2, mRNA
XM_037198865.1	1842	0.17	1.81	1	0.6	150.82	0.0187	Prps1	phosphoribosyl pyrophosphate synthetase 1 (Prps1), transcript variant X2, mRNA
XM_028863421.2	5324	2.77	-1.29	1	0.36	376.71	0.0188	Mast3	microtubule associated serine/threonine kinase 3 (Mast3), transcript variant X5, mRNA
XM_037207369.1	1170	0.66	-64.8	0.0252	0.45	-51.13	0.0188	Tpm1	tropomyosin 1 (Tpm1), transcript variant X4, mRNA
XM_037196850.1	4934	0.16	100.89	0.0509	0.18	-279.49	0.0188	Gnptab	N-acetylglucosamine-1-phosphate transferase subunits alpha and beta (Gnptab), transcript variant X1, mRNA
XM_028869737.2	7791	0.1	-65.09	0.0637	0.03	-389.65	0.0188	Ralgapa1	Ral GTPase activating protein catalytic subunit alpha 1 (Ralgapa1), transcript variant X10, mRNA
XM_028886993.2	5271	0.22	-24.8	0.0662	0.35	406.87	0.0188	Dag1	dystroglycan 1 (Dag1), transcript variant X8, mRNA
XM_037207832.1	3417	1.34	-156.17	0.000108	2.01	25.13	0.0189	Tbc1d2b	TBC1 domain family member 2B (Tbc1d2b), transcript variant X3, mRNA
XM_037209547.1	1722	1.56	-1.87	1	7.04	6.9	0.0189	LOC114689188	baculoviral IAP repeat-containing protein 1a-like (LOC114689188), mRNA
XR_005092509.1	1527	0.49	2.93	0.85	2.2	16.91	0.0189	LOC119088782	uncharacterized LOC119088782 (LOC119088782), ncRNA
XM_028885903.2	1211	0.32	1.61	1	0.5	-205.41	0.019	Fam216a	family with sequence similarity 216 member A (Fam216a), transcript variant X2, mRNA
XM_028876067.1	10481	0.95	1.75	0.811	1.38	-7.5	0.019	Sptb	spectrin beta, erythrocytic (Sptb), transcript variant X1, mRNA
XM_028868536.2	7544	0.52	1026.15	0.00916	0.19	322.45	0.019	Ncoa3	nuclear receptor coactivator 3 (Ncoa3), transcript variant X4, mRNA
XM_037206093.1	7371	0.07	35.76	0.361	0.13	-80.97	0.019	Nlrc5	NLR family CARD domain containing 5 (Nlrc5), transcript variant X1, mRNA
XM_028867360.2	5632	0.52	858.14	0.00619	0.34	362.51	0.019	Znf644	zinc finger protein 644 (Znf644), transcript variant X7, mRNA
XM_028854760.2	3117	0.02	4.96	NaN	0.15	-267.58	0.0191	Mmab	metabolism of cobalamin associated B (Mmab), transcript variant X4, mRNA
XM_037199707.1	7601	0.22	2.64	1	0.09	-220.62	0.0191	Phf3	PHD finger protein 3 (Phf3), transcript variant X5, mRNA
XM_028875440.2	2602	4.27	-1.29	1	10.54	4.83	0.0191	Cnr2	cannabinoid receptor 2 (Cnr2), transcript variant X2, mRNA
XM_037209112.1	4991	0.81	-1.45	1	0.7	634.07	0.0192	Cep135	centrosomal protein 135 (Cep135), transcript variant X3, mRNA
XM_028856004.2	3904	0.65	-29.27	0.0499	0.22	-449.88	0.0192	Gpr146	G protein-coupled receptor 146 (Gpr146), transcript variant X4, mRNA
XM_037211239.1	1152	0.02	-3.85	NaN	3.82	-21.33	0.0193	Itln1	intelectin-1a-like (LOC114690754), transcript variant X2, mRNA
XM_028873560.2	5146	0.17	-73.63	0.0165	0.48	51.91	0.0194	Ktn1	kinectin 1 (Ktn1), transcript variant X1, mRNA
XM_028882982.2	4936	0.49	1.07	1	0.18	-272.63	0.0194	Elp1	elongator acetyltransferase complex subunit 1 (Elp1), transcript variant X2, mRNA
XR_003733443.2	1607	1.89	-1.11	1	0.66	-312.91	0.0194	Mpnd	MPN domain containing (Mpnd), transcript variant X3, misc_RNA
XM_028859509.2	4093	0.4	-353.7	0.0276	0.37	311.23	0.0194	Slc25a51	solute carrier family 25 member 51 (Slc25a51), transcript variant X4, mRNA
XM_037197386.1	2011	3.18	2.44	0.735	2.4	12.84	0.0194	Lmbr1l	limb development membrane protein 1 like (Lmbr1l), transcript variant X2, mRNA
XM_028891089.2	2810	0.05	2.27	1	0.12	-251.09	0.0194	LOC114708083	3-alpha-hydroxysteroid dehydrogenase-like (LOC114708083), transcript variant X1, mRNA
XM_028880487.2	8523	0	NaN	NaN	0.03	-380.91	0.0194	Erc1	ELKS/RAB6-interacting/CAST family member 1 (Erc1), transcript variant X5, mRNA
XM_028876031.2	6115	0.47	-11.33	0.23	2.01	14.64	0.0194	Asap1	ArfGAP with SH3 domain, ankyrin repeat and PH domain 1 (Asap1), transcript variant X4, mRNA
XM_028862479.2	3532	0.04	-1.83	1	12.88	-4.47	0.0194	Steap2	STEAP2 metalloreductase (Steap2), transcript variant X1, mRNA
XM_028885330.2	3099	0.23	-1.05	1	0.69	396.85	0.0194	Slco4a1	solute carrier organic anion transporter family member 4A1 (Slco4a1), transcript variant X1, mRNA
XM_028894753.2	2529	0.57	-1.21	1	1.11	441.63	0.0194	Melk	maternal embryonic leucine zipper kinase (Melk), transcript variant X1, mRNA
XM_037207646.1	4106	0	NaN	NaN	0.59	464.69	0.0194	Kirrel3	kirre like nephrin family adhesion molecule 3 (Kirrel3), transcript variant X1, mRNA
XM_037209615.1	9529	0.18	-1.41	1	0.07	-474.88	0.0194	Brwd1	bromodomain and WD repeat domain containing 1 (Brwd1), transcript variant X4, mRNA
XM_028856091.2	8510	0	NaN	NaN	0.05	-377.79	0.0196	Chd8	chromodomain helicase DNA binding protein 8 (Chd8), transcript variant X1, mRNA
XM_028885245.2	2269	0.24	30.35	0.122	0.45	-429.85	0.0196	Tpd52l2	TPD52 like 2 (Tpd52l2), transcript variant X9, mRNA
XM_037202162.1	1861	16.41	-1.68	1	14.8	11.43	0.0196	Lilra3	leukocyte immunoglobulin-like receptor subfamily A member 3 (LOC114687921), transcript variant X6, mRNA
XM_028879348.2	3724	1.25	-3.67	0.171	0.47	60.46	0.0196	Clcc1	chloride channel CLIC like 1 (Clcc1), transcript variant X2, mRNA
XM_028866919.2	11117	0.28	3.78	0.643	0.17	289.89	0.0196	Nf1	neurofibromin 1 (Nf1), transcript variant X2, mRNA
XM_028877253.2	3099	0.58	1.92	1	8.91	-10.91	0.0196	Slc16a9	solute carrier family 16 member 9 (Slc16a9), mRNA
XR_005092943.1	265	3.85	-1.85	1	1.57	-40.83	0.0196	LOC119089112	uncharacterized LOC119089112 (LOC119089112), ncRNA
XM_037210443.1	5636	0.25	41.58	0.0106	0.4	336.81	0.0197	LOC114705310	protein-lysine methyltransferase METTL21E (LOC114705310), transcript variant X2, mRNA
XM_037211347.1	3797	27.37	-1.28	0.992	128.24	-7.13	0.0197	Cfh	complement factor H-like (LOC114684899), mRNA
XM_037197280.1	5666	1.32	1.17	1	1.16	10.45	0.0197	Emsy	EMSY transcriptional repressor, BRCA2 interacting (Emsy), transcript variant X13, mRNA
XM_028864764.2	4571	0.88	2.67	0.818	0.79	23.84	0.0197	Mbd1	methyl-CpG binding domain protein 1 (Mbd1), transcript variant X19, mRNA
XM_028860779.2	2256	1.79	-1.04	1	2.03	14.15	0.0197	Ilvbl	ilvB acetolactate synthase like (Ilvbl), transcript variant X3, mRNA
XM_037200266.1	4218	0.69	1.09	1	0.71	495.04	0.0197	Rev1	REV1 DNA directed polymerase (Rev1), transcript variant X6, mRNA
XM_037209989.1	1155	2.19	1.73	1	2.24	134.81	0.0197	LOC114701480	prosaposin-like (LOC114701480), mRNA
XM_037205232.1	2084	0.5	2.11	1	0.6	-24.1	0.0197	Smox	spermine oxidase (Smox), transcript variant X3, mRNA
XM_028874524.2	2534	0.4	-213.63	0.0444	0.55	83.48	0.0197	Nr4a1	nuclear receptor subfamily 4 group A member 1 (Nr4a1), transcript variant X3, mRNA
XM_028863813.2	4462	0.44	-1.08	1	0.71	589.33	0.0197	Spin1	spindlin 1 (Spin1), transcript variant X2, mRNA
XM_037209466.1	3011	0.22	-1.58	1	0.83	417.01	0.0198	Ccdc125	coiled-coil domain containing 125 (Ccdc125), transcript variant X3, mRNA
XM_028863957.2	7122	0.31	2.01	1	0.21	425.3	0.0198	Atp2b2	ATPase plasma membrane Ca2+ transporting 2 (Atp2b2), transcript variant X6, mRNA
XM_028870982.2	2702	0.54	-3.55	0.723	0.9	439.38	0.0198	Ppp1r16a	protein phosphatase 1 regulatory subunit 16A (Ppp1r16a), transcript variant X3, mRNA
XM_028868866.2	1291	0.15	-1.68	1	1.05	-32.61	0.0198	LOC114692843	ficolin-1 (LOC114692843), transcript variant X2, mRNA
XM_037211337.1	3122	1.27	1.78	1	16.86	-15.41	0.0198	Prg4	proteoglycan 4 (Prg4), transcript variant X2, mRNA
XM_028883676.1	2862	0	NaN	NaN	0.08	-372.17	0.0198	Mta1	metastasis associated 1 (Mta1), transcript variant X5, mRNA
XR_005092062.1	2042	4.14	1.96	0.63	2.06	14.08	0.0198	Emid1	EMI domain containing 1 (Emid1), transcript variant X8, misc_RNA
XM_028886161.2	5508	0.38	-492.83	0.015	0.18	-71.94	0.02	Unc5b	unc-5 netrin receptor B (Unc5b), transcript variant X1, mRNA
XM_037209895.1	4874	1.28	-1.46	1	1.85	11.43	0.02	Abcc5	ATP binding cassette subfamily C member 5 (Abcc5), transcript variant X6, mRNA
XM_028861134.2	1388	11.82	-1.26	1	49.7	-3.93	0.0201	Rab32	RAB32, member RAS oncogene family (Rab32), mRNA
XM_037207857.1	2191	0.31	26.85	0.627	0.18	-260.89	0.0201	Nmnat3	nicotinamide nucleotide adenylyltransferase 3 (Nmnat3), transcript variant X1, mRNA
XM_037205671.1	4702	0.27	-4.07	0.908	0.58	514.34	0.0201	Tut7	terminal uridylyl transferase 7 (Tut7), transcript variant X11, mRNA
XM_028858346.2	1670	0.12	-2.12	1	4.32	-18.92	0.0203	Klk9	kallikrein related peptidase 9 (Klk9), mRNA
XM_028890995.1	7463	0.98	3.79	0.84	0.32	431.24	0.0204	Tns3	tensin 3 (Tns3), transcript variant X2, mRNA
XM_028859350.2	2918	1.53	-1.58	1	0.59	372.94	0.0204	Phtf1	putative homeodomain transcription factor 1 (Phtf1), transcript variant X1, mRNA
XM_028881999.2	2780	0.82	1.38	1	0.85	423.13	0.0204	Ppig	peptidylprolyl isomerase G (Ppig), transcript variant X7, mRNA
XM_028892048.2	5504	1.31	-1.13	1	0.39	457.54	0.0204	Zmym3	zinc finger MYM-type containing 3 (Zmym3), transcript variant X2, mRNA
XM_037203013.1	4661	1.15	-1.2	1	2.2	7.39	0.0204	Gmeb1	glucocorticoid modulatory element binding protein 1 (Gmeb1), transcript variant X4, mRNA
XM_037206849.1	5722	4.87	-1.08	1	9.99	4.34	0.0204	Dennd4b	DENN domain containing 4B (Dennd4b), transcript variant X3, mRNA
XM_028855746.2	2073	0.76	13.9	0.189	0.92	389.28	0.0204	LOC114681989	cytochrome P450 2J3-like (LOC114681989), transcript variant X2, mRNA
XM_028887221.2	4198	0.88	-1.24	1	0.56	439.74	0.0205	Ptk7	protein tyrosine kinase 7 (inactive) (Ptk7), transcript variant X2, mRNA
XM_028891449.2	7125	0.37	1.23	1	0.22	357.66	0.0205	Agrn	agrin (Agrn), transcript variant X9, mRNA
XM_037205840.1	1278	11.56	-6.25	0.0201	90.07	3.58	0.0206	Serpinb1	serpin family B member 1 (Serpinb1), transcript variant X2, mRNA
XM_037203828.1	2423	0.94	-1.09	1	0.59	262.37	0.0211	Loxl3	lysyl oxidase like 3 (Loxl3), transcript variant X3, mRNA
XM_028861283.2	3769	0.02	-4.34	NaN	0.23	-253.72	0.0213	Plagl1	PLAG1 like zinc finger 1 (Plagl1), transcript variant X4, mRNA
XM_037204166.1	3873	0.36	3.77	0.896	0.3	245.47	0.0213	Foxj2	forkhead box J2 (Foxj2), transcript variant X3, mRNA
XM_028875929.2	2915	0.4	3.11	0.941	0.38	253.99	0.0214	CXHXorf38	chromosome X CXorf38 homolog (CXHXorf38), transcript variant X2, mRNA
XM_028870061.2	4369	1.43	-1.53	1	1.51	14.3	0.0214	Kansl1l	KAT8 regulatory NSL complex subunit 1 like (Kansl1l), transcript variant X5, mRNA
XM_037205708.1	3120	1.3	1.24	1	15.52	5.32	0.0214	Hk3	hexokinase 3 (Hk3), transcript variant X2, mRNA
XM_028891094.2	6886	0.23	1.21	1	0.27	278.09	0.0214	Ap1g1	adaptor related protein complex 1 subunit gamma 1 (Ap1g1), transcript variant X1, mRNA
XM_028882834.2	7943	0.22	-1.19	1	0.19	-387.28	0.0215	Syt14	synaptotagmin 14 (Syt14), transcript variant X9, mRNA
XM_028888510.2	6611	0.94	1.07	1	0.46	486.06	0.0216	Znf275	zinc finger protein 275 (Znf275), transcript variant X2, mRNA
XM_028883061.2	2604	0.29	-2.28	1	16.32	3.97	0.0217	Hes3	hes family bHLH transcription factor 3 (Hes3), transcript variant X1, mRNA
XM_028878563.2	9410	0.21	-1.22	1	0.28	430.7	0.0218	Akap11	A-kinase anchoring protein 11 (Akap11), transcript variant X2, mRNA
XM_028886546.2	2446	6.63	1.01	1	20.49	3.51	0.0218	B4galt6	beta-1,4-galactosyltransferase 6 (B4galt6), transcript variant X1, mRNA
XM_037206773.1	4580	0.62	-1.2	1	0.25	238.74	0.0218	Syt11	synaptotagmin 11 (Syt11), transcript variant X2, mRNA
XM_028855651.1	15459	0	NaN	NaN	0.02	-95.33	0.0218	Hectd4	HECT domain E3 ubiquitin protein ligase 4 (Hectd4), transcript variant X4, mRNA
XM_028857814.2	5635	0	NaN	NaN	0.09	-268.82	0.0218	Rimklb	ribosomal modification protein rimK like family member B (Rimklb), transcript variant X1, mRNA
XM_028854721.2	2989	0.58	559.43	0.00785	0.6	325.17	0.0218	Csrnp1	cysteine and serine rich nuclear protein 1 (Csrnp1), transcript variant X1, mRNA
XR_003734894.2	7181	0.2	1.2	1	0.38	414.65	0.0218	LOC114695647	uncharacterized LOC114695647 (LOC114695647), transcript variant X1, ncRNA
XM_028892917.2	3226	1.07	3.81	0.723	0.48	280.63	0.0219	Msh2	mutS homolog 2 (Msh2), transcript variant X1, mRNA
XM_028878970.2	3956	0.59	5.22	0.499	0.43	421.36	0.022	Phf21a	PHD finger protein 21A (Phf21a), transcript variant X13, mRNA
XM_028856743.2	3833	5.79	-1.11	1	3.72	-3.77	0.022	Parvb	parvin beta (Parvb), transcript variant X1, mRNA
XR_005090546.1	1445	17.22	-1.26	1	6.51	7.24	0.022	LOC114687968	uncharacterized LOC114687968 (LOC114687968), transcript variant X2, ncRNA
XM_028855082.2	3119	0.27	6.44	0.693	0.12	-80.53	0.0221	Zfp60	zinc finger protein 60 (LOC114681543), transcript variant X4, mRNA
XM_028858730.2	2431	0.44	-2.2	1	0.4	-130.34	0.0221	LOC114684223	histo-blood group ABO system transferase 2 (LOC114684223), transcript variant X2, mRNA
XM_028880918.2	5810	0.65	1.5	1	0.52	492.03	0.0221	Esyt2	extended synaptotagmin 2 (Esyt2), transcript variant X1, mRNA
XM_028865403.2	814	0.15	1.17	1	0.39	-33.39	0.0223	LOC114690552	40S ribosomal protein S4, X isoform-like (LOC114690552), mRNA
XM_028886930.2	1602	0.57	1.47	1	0.23	-188.5	0.0224	Osgepl1	O-sialoglycoprotein endopeptidase like 1 (Osgepl1), transcript variant X6, mRNA
XM_028889934.2	1136	10.19	1.02	1	21.23	-3.79	0.0224	Rhoc	ras homolog family member C (Rhoc), transcript variant X1, mRNA
XM_037208456.1	4680	0.14	-1.55	1	0.3	80.52	0.0224	Hmbox1	homeobox containing 1 (Hmbox1), transcript variant X6, mRNA
XM_037203023.1	3341	0.73	2.62	0.842	0.48	97.68	0.0225	Fam76a	family with sequence similarity 76 member A (Fam76a), transcript variant X2, mRNA
XM_037206127.1	4976	1.36	-313.67	7.32e-12	0.39	320.94	0.0225	Tbc1d9	TBC1 domain family member 9 (Tbc1d9), transcript variant X3, mRNA
XM_028873426.2	3826	0.37	1.16	1	0.87	-31.48	0.0225	Picalm	phosphatidylinositol binding clathrin assembly protein (Picalm), transcript variant X5, mRNA
XM_037205215.1	4023	13.84	-1.4	0.534	17.93	3.05	0.0225	Sirpa	signal regulatory protein alpha (Sirpa), transcript variant X2, mRNA
XM_028855042.2	2884	0.58	-372.55	0.0261	0.77	314.41	0.0225	Akt2	AKT serine/threonine kinase 2 (Akt2), transcript variant X5, mRNA
XM_028872222.2	4232	0.58	-2.05	1	0.24	-273.16	0.0225	Plekha5	pleckstrin homology domain containing A5 (Plekha5), transcript variant X34, mRNA
XM_037202748.1	2404	0.08	3.85	1	0.17	-186.89	0.0226	Dnai4	dynein axonemal intermediate chain 4 (Dnai4), transcript variant X2, mRNA
XM_028855334.2	6451	0.2	1.05	1	0.06	-87.07	0.0226	Znf568	zinc finger protein 568 (Znf568), transcript variant X2, mRNA
XM_037208620.1	4843	0.22	-121.43	0.0126	0.23	-108.58	0.0226	Ppp6r3	protein phosphatase 6 regulatory subunit 3 (Ppp6r3), transcript variant X11, mRNA
XM_028886100.2	6035	0.07	95.66	0.194	0.37	451.72	0.0226	Dab2	DAB2 interacting protein (LOC114704709), transcript variant X2, mRNA
XM_037200174.1	3313	0.36	-1.46	1	0.5	323.28	0.0228	Ppard	peroxisome proliferator activated receptor delta (Ppard), transcript variant X2, mRNA
XM_028892985.2	2614	0.59	-1.16	1	0.52	255.96	0.0229	Cnot10	CCR4-NOT transcription complex subunit 10 (Cnot10), transcript variant X7, mRNA
XM_037204184.1	9554	0.07	195.89	0.0462	0.08	-71.62	0.0229	Mical3	microtubule associated monooxygenase, calponin and LIM domain containing 3 (Mical3), transcript variant X10, mRNA
XM_037199256.1	6522	0.87	2.85	0.511	0.36	539.57	0.0229	Dock11	dedicator of cytokinesis 11 (Dock11), transcript variant X3, mRNA
XM_037200076.1	3776	0.61	-4.05	0.514	0.32	256.99	0.023	Bag6	BAG cochaperone 6 (Bag6), transcript variant X9, mRNA
XM_037208919.1	1621	2.58	2.88	0.567	1.34	394.71	0.023	Vrk2	VRK serine/threonine kinase 2 (Vrk2), transcript variant X5, mRNA
XM_037203763.1	3276	2.42	-1.42	1	7.71	5.45	0.0231	Creb5	cAMP responsive element binding protein 5 (Creb5), transcript variant X2, mRNA
XM_028870937.2	5140	0.19	310.67	0.0313	0.41	142.6	0.0234	Wdr97	WD repeat domain 97 (Wdr97), transcript variant X1, mRNA
XM_037205029.1	3165	0.73	1.74	1	0.94	15.51	0.0234	LOC114703448	protein FAM111A-like (LOC114703448), transcript variant X1, mRNA
XM_037207244.1	2313	0	NaN	NaN	0.1	-255.94	0.0234	Cryz	crystallin zeta (Cryz), transcript variant X4, mRNA
XR_003735748.2	6781	0.06	1.14	1	0.09	-132.59	0.0234	Zcchc14	zinc finger CCHC-type containing 14 (Zcchc14), transcript variant X3, misc_RNA
XM_028873480.2	2735	0.18	1.1	1	0.32	-94.06	0.0235	Ttc27	tetratricopeptide repeat domain 27 (Ttc27), transcript variant X4, mRNA
XM_028854584.2	851	0.45	2.35	1	0.63	-44.17	0.0235	Mcrip2	MAPK regulated corepressor interacting protein 2 (Mcrip2), transcript variant X2, mRNA
XM_028890627.2	4801	0.52	-1.06	1	0.35	262.11	0.0236	Pask	PAS domain containing serine/threonine kinase (Pask), transcript variant X2, mRNA
XM_037209729.1	589	119.11	-1.94	0.861	943.37	-11.51	0.0236	LOC114685170	resistin-like alpha (LOC114685170), mRNA
XM_028868923.2	7239	0.25	576.73	0.0235	0.19	78.99	0.0238	Spag9	sperm associated antigen 9 (Spag9), transcript variant X15, mRNA
XM_028856931.2	2292	0.1	-7.43	0.486	1.48	-23.36	0.0238	Homer3	homer scaffold protein 3 (Homer3), transcript variant X3, mRNA
XM_037204788.1	5531	0.03	1.66	1	0.06	-218.6	0.0238	Fmnl2	formin like 2 (Fmnl2), transcript variant X5, mRNA
XM_037196912.1	2428	0.04	1.01	1	0.15	-257.12	0.0238	LOC114706630	interleukin 18 binding protein (LOC114706630), transcript variant X2, mRNA
XM_037201814.1	616	355.67	-2.29	0.00701	3839.02	-5.84	0.0238	Timd2	T-cell immunoglobulin and mucin domain-containing protein 2-like (LOC114689091), partial mRNA
XM_028883949.2	1296	1.18	-5.87	0.455	1.35	-17.24	0.0238	Tpm2	tropomyosin 2 (Tpm2), transcript variant X2, mRNA
XM_028882959.2	4947	0.73	4.46	0.612	0.1	-99.7	0.0238	Grb10	growth factor receptor bound protein 10 (Grb10), transcript variant X4, mRNA
XM_028884718.2	3240	0.26	-1.75	1	0.77	412.52	0.0238	Slc25a25	solute carrier family 25 member 25 (Slc25a25), transcript variant X8, mRNA
XM_037202597.1	2625	1.45	-1.7	1	0.6	323.37	0.0238	Tex10	testis expressed 10 (Tex10), transcript variant X3, mRNA
XM_037210644.1	10229	1.62	1.25	1	2.55	-3.13	0.0238	Sptb	spectrin beta, erythrocytic (Sptb), transcript variant X2, mRNA
XM_028890881.2	3843	0.79	3.36	0.715	0.73	18.84	0.0239	Ubap2l	ubiquitin associated protein 2 like (Ubap2l), transcript variant X20, mRNA
XM_037200859.1	2476	0.61	1.27	1	0.5	311.49	0.0239	LOC114702205	RAD52 motif-containing protein 1-like (LOC114702205), transcript variant X2, mRNA
XM_037208775.1	5408	0.22	-1.67	1	0.14	-62.79	0.0239	LOC114702135	sarcolemma associated protein (LOC114702135), transcript variant X14, mRNA
XM_028863621.2	3486	0	NaN	NaN	0.12	-255.91	0.0239	LOC114689254	UL16-binding protein 1-like (LOC114689254), transcript variant X2, mRNA
XM_028858130.2	2779	1.81	2.04	1	0.86	391.68	0.024	Zmym5	zinc finger MYM-type containing 5 (Zmym5), transcript variant X4, mRNA
XM_037202970.1	1370	0.37	1.08	1	0.83	37.08	0.024	Tmem39b	transmembrane protein 39B (Tmem39b), transcript variant X9, mRNA
XM_037208537.1	2203	1.5	1.34	1	0.67	84.91	0.024	Slc7a7	solute carrier family 7 member 7 (Slc7a7), transcript variant X2, mRNA
XM_037209345.1	2437	0.6	1.51	1	0.63	115.9	0.024	Ric8a	RIC8 guanine nucleotide exchange factor A (Ric8a), transcript variant X1, mRNA
XM_028881924.2	1182	1.22	-1.21	1	137.94	-4.04	0.024	Cxcl10	C-X-C motif chemokine ligand 10 (Cxcl10), mRNA
XM_028885812.2	7097	2.67	1.14	1	1.08	11.73	0.024	Pitpnm2	phosphatidylinositol transfer protein membrane associated 2 (Pitpnm2), transcript variant X3, mRNA
XM_028891655.2	4925	0.01	-10.99	NaN	0.24	-372.73	0.024	Ppfibp1	PPFIA binding protein 1 (Ppfibp1), transcript variant X7, mRNA
XM_037211211.1	850	3.63	-1.21	1	1.61	92.75	0.0241	Aim2	interferon-inducible protein AIM2-like (LOC114690680), transcript variant X5, mRNA
XM_028881294.2	4792	2.62	-1.11	1	12.93	2.95	0.0246	Atp11a	ATPase phospholipid transporting 11A (Atp11a), transcript variant X7, mRNA
XM_037209057.1	4716	0.16	1.17	1	0.2	-105.01	0.0247	Rbm47	RNA binding motif protein 47 (Rbm47), transcript variant X10, mRNA
XM_037197237.1	4006	0.44	-369.61	0.0268	0.05	-240.45	0.0247	Map6	microtubule associated protein 6 (Map6), transcript variant X2, mRNA
XM_028873440.2	3527	0.54	-2.98	0.994	17.87	-5.63	0.0247	Picalm	phosphatidylinositol binding clathrin assembly protein (Picalm), transcript variant X18, mRNA
XM_028853618.1	1985	0.85	-1.6	1	0.29	-191.52	0.0247	Baiap2	BAR/IMD domain containing adaptor protein 2 (Baiap2), transcript variant X4, mRNA
XM_028872188.2	4366	0.06	-2.07	1	0.29	-76.9	0.0247	Eps8	epidermal growth factor receptor pathway substrate 8 (Eps8), transcript variant X5, mRNA
XM_028875932.2	6464	0.11	-203.9	0.0321	0.22	-353.87	0.0247	Bcor	BCL6 corepressor (Bcor), transcript variant X1, mRNA
XM_037203882.1	10182	0.34	2.81	0.899	0.22	383.77	0.0247	Aak1	AP2 associated kinase 1 (Aak1), transcript variant X8, mRNA
XM_028878904.2	2969	0.45	-2.47	1	0.52	55.5	0.0248	Arfgap2	ADP ribosylation factor GTPase activating protein 2 (Arfgap2), transcript variant X2, mRNA
XM_028882843.2	3833	1	1.47	1	0.55	-17.1	0.0248	Rcor3	REST corepressor 3 (Rcor3), transcript variant X1, mRNA
XM_028884791.2	3442	0.17	-147.11	0.0787	0.07	-253.4	0.0248	Rbm10	RNA binding motif protein 10 (Rbm10), transcript variant X9, mRNA
XM_028890464.1	6307	0.16	-56.55	0.0482	0.16	-251.04	0.0248	Znf445	zinc finger protein 445 (Znf445), transcript variant X5, mRNA
XM_037202056.1	1706	0.42	1.42	1	0.64	-52.34	0.0248	Meis3	Meis homeobox 3 (Meis3), transcript variant X4, mRNA
XM_028874680.2	3229	0.03	18.15	NaN	0.07	-244.76	0.0249	Ina	internexin neuronal intermediate filament protein alpha (Ina), mRNA
XM_028888936.1	1392	0.11	-5.03	0.98	0.14	-242.44	0.0249	Ergic3	ERGIC and golgi 3 (Ergic3), transcript variant X1, mRNA
XM_028873887.2	10481	0.12	-4.36	0.892	0.12	298.77	0.025	Znf236	zinc finger protein 236 (Znf236), transcript variant X1, mRNA
XM_028885741.2	2681	0.26	1.96	1	0.5	269.22	0.025	Dync1i2	dynein cytoplasmic 1 intermediate chain 2 (Dync1i2), transcript variant X1, mRNA
XM_028888009.2	3715	0.6	1.16	1	0.76	-9.17	0.025	Bag6	BAG cochaperone 6 (Bag6), transcript variant X19, mRNA
XM_028893952.2	4948	0.47	-1.22	1	0.45	434.23	0.025	Phkb	phosphorylase kinase regulatory subunit beta (Phkb), transcript variant X2, mRNA
XM_028890489.2	4921	0	NaN	NaN	0.17	-297.84	0.025	Lars2	leucyl-tRNA synthetase 2, mitochondrial (Lars2), transcript variant X5, mRNA
XM_028880155.2	11143	0.07	-1.33	1	0.11	102.91	0.0251	Nav2	neuron navigator 2 (Nav2), transcript variant X6, mRNA
XM_028880962.1	5081	0.04	17.9	0.426	0.1	-232.86	0.0253	E2f3	E2F transcription factor 3 (E2f3), transcript variant X1, mRNA
XM_028859726.2	1586	0.25	21.71	0.252	0.29	-199.52	0.0254	Mrm2	mitochondrial rRNA methyltransferase 2 (Mrm2), transcript variant X1, mRNA
XM_028873523.2	701	1.77	-1.49	1	1.25	-31.47	0.0255	LOC114696007	angiogenin (LOC114696007), transcript variant X2, mRNA
XM_037199815.1	4288	14.68	-1.15	1	34.37	3.23	0.0257	Vsir	V-set immunoregulatory receptor (Vsir), transcript variant X2, mRNA
XM_037204910.1	3569	0.37	1.36	1	0.31	-102.38	0.0257	Dnajc10	DnaJ heat shock protein family (Hsp40) member C10 (Dnajc10), transcript variant X2, mRNA
XM_028861409.2	4955	9.05	-1.19	1	7.59	-3.38	0.0257	Atp10d	ATPase phospholipid transporting 10D (putative) (Atp10d), transcript variant X1, mRNA
XM_037209960.1	8014	4.52	-1.16	1	8.09	3.01	0.0257	Fgd4	FYVE, RhoGEF and PH domain containing 4 (Fgd4), transcript variant X5, mRNA
XM_037200197.1	6077	0.3	-1.26	1	0.22	273.49	0.0257	Col11a2	collagen type XI alpha 2 chain (Col11a2), transcript variant X7, mRNA
XM_028860532.2	2513	0.45	2.94	0.963	0.31	-225.34	0.0258	Immt	inner membrane mitochondrial protein (Immt), transcript variant X10, mRNA
XM_028867328.2	2360	21.1	1.08	1	17.92	3.11	0.0258	LOC114691802	ATP-binding cassette sub-family G member 3-like (LOC114691802), transcript variant X1, mRNA
XM_028872409.2	2954	0.37	1.62	1	0.21	-383.92	0.0258	LOC114695188	zinc finger protein 426 (LOC114695188), transcript variant X5, mRNA
XM_037199165.1	7718	0.67	1.84	1	0.37	458.48	0.0258	Zfp431	zinc finger protein 431-like (LOC114700701), transcript variant X6, mRNA
XM_037205670.1	4773	0.18	1.01	1	0.65	478.74	0.0258	Tut7	terminal uridylyl transferase 7 (Tut7), transcript variant X9, mRNA
XM_037209180.1	2836	0.19	1.11	1	0.13	-238.46	0.0258	Septin11	septin 11 (Septin11), transcript variant X5, mRNA
XM_028866629.2	1715	0	NaN	NaN	0.77	-42.5	0.0258	Unc93a	unc-93 homolog A (Unc93a), transcript variant X1, mRNA
XM_028885268.2	1056	2.77	-2.91	0.54	0.84	77.78	0.0259	Hspb3	heat shock protein family B (small) member 3 (Hspb3), mRNA
XM_028889222.2	3392	5.27	-1.61	0.828	59.31	-5.34	0.0259	Tgm2	transglutaminase 2 (Tgm2), mRNA
XM_037206739.1	2722	23.41	-1.53	0.979	270.18	-9.65	0.0259	Cd5l	CD5 molecule like (Cd5l), mRNA
XM_028869743.2	2629	2.06	1.05	1	9.95	-5.48	0.0259	Brms1l	BRMS1 like transcriptional repressor (Brms1l), mRNA
XM_028876089.2	3328	0.16	-1.84	1	0.22	-220.13	0.0259	Gphn	gephyrin (Gphn), transcript variant X6, mRNA
XM_028885321.2	2706	0.26	1.08	1	0.43	241.33	0.0259	Col9a3	collagen type IX alpha 3 chain (Col9a3), transcript variant X1, mRNA
XM_037202572.1	6407	0.13	1.11	1	0.12	-216.43	0.0259	Pax5	paired box 5 (Pax5), transcript variant X4, mRNA
XM_037203730.1	1423	0.44	-1.15	1	0.78	246.58	0.0259	Prkag2	protein kinase AMP-activated non-catalytic subunit gamma 2 (Prkag2), transcript variant X10, mRNA
XM_037205724.1	1304	7.03	-1.4	1	6.44	7.79	0.0259	Auh	AU RNA binding methylglutaconyl-CoA hydratase (Auh), transcript variant X2, mRNA
XM_028890206.2	14105	2.75	-1.68	0.498	4.67	3.38	0.0259	LOC114707476	nesprin-1 (LOC114707476), transcript variant X1, mRNA
XM_028856589.2	3317	0.35	-1.79	1	0.43	261.1	0.026	Mtm1	myotubularin 1 (Mtm1), transcript variant X3, mRNA
XM_037211004.1	3020	0.05	3.39	1	0.46	264.77	0.0262	Polr3e	RNA polymerase III subunit E (Polr3e), transcript variant X1, mRNA
XM_037197842.1	1930	1.27	1.1	1	0.68	59.85	0.0264	LOC114688855	cation channel sperm-associated protein subunit delta (LOC114688855), transcript variant X5, mRNA
XM_028877468.2	2544	0.53	1.02	1	5.81	-7.5	0.0264	Tsku	tsukushi, small leucine rich proteoglycan (Tsku), transcript variant X1, mRNA
XM_028858160.2	2666	0.42	377.5	0.0447	0.15	-234.77	0.0264	Apbb1	amyloid beta precursor protein binding family B member 1 (Apbb1), transcript variant X2, mRNA
XM_028866964.2	2340	0.63	-15.69	0.247	0.15	-228.13	0.0264	Znf207	zinc finger protein 207 (Znf207), transcript variant X1, mRNA
XM_028865701.2	2808	0.3	-1.64	1	0.13	-64.53	0.0265	Tsga10	testis specific 10 (Tsga10), transcript variant X3, mRNA
XM_028877180.2	1103	0	NaN	NaN	0.88	-294.62	0.0265	Rbpms	RNA binding protein, mRNA processing factor (Rbpms), transcript variant X1, mRNA
XM_037201589.1	1520	3.74	-3.05	0.463	37.24	2.98	0.0266	Litaf	lipopolysaccharide induced TNF factor (Litaf), transcript variant X3, mRNA
XM_028873823.2	3454	3.27	-1.25	1	14.77	-3.59	0.0266	Tlnrd1	talin rod domain containing 1 (Tlnrd1), mRNA
XM_037197941.1	3319	1.09	39.2	0.00407	0.5	43.47	0.0266	LOC114684972	protection of telomeres protein 1-like (LOC114684972), transcript variant X3, mRNA
XM_028863845.2	4407	3.69	-4.12	0.0217	66.99	3.46	0.0266	Slc28a3	solute carrier family 28 member 3 (Slc28a3), mRNA
XM_028870367.2	5769	18.52	-1.02	1	38.55	2.94	0.0266	Spata13	spermatogenesis associated 13 (Spata13), transcript variant X5, mRNA
XM_037202513.1	4272	0.22	1.52	1	0.2	-69.96	0.0266	Ubap2	ubiquitin associated protein 2 (Ubap2), transcript variant X6, mRNA
XM_028879364.2	5782	0.03	1.62	1	0.1	-224.54	0.0267	Elapor1	endosome-lysosome associated apoptosis and autophagy regulator 1 (Elapor1), transcript variant X1, mRNA
XM_028879870.2	1309	4.81	6.7	0.102	1.8	-13.45	0.0267	Ldhb	lactate dehydrogenase B (Ldhb), mRNA
XM_037204494.1	7614	0.29	1.26	1	0.47	459.08	0.0267	Cntrl	centriolin (Cntrl), transcript variant X3, mRNA
XM_028858719.2	5215	0.11	188.16	0.0549	0.07	-227.22	0.0267	Vav2	vav guanine nucleotide exchange factor 2 (Vav2), transcript variant X5, mRNA
XM_037209411.1	10072	0.02	62.02	0.175	0.08	-217.72	0.0267	Rictor	RPTOR independent companion of MTOR complex 2 (Rictor), transcript variant X4, mRNA
XM_037209800.1	5989	0.25	79.37	0.0277	0.14	-334.85	0.027	Senp5	SUMO specific peptidase 5 (Senp5), transcript variant X3, mRNA
XM_028866158.2	12889	0.43	-1.05	1	0.8	-5.46	0.027	Plxna4	plexin A4 (Plxna4), mRNA
XM_037207261.1	3258	0.12	7.99	0.557	0.18	-57.21	0.027	Depdc1	DEP domain containing 1 (Depdc1), transcript variant X2, mRNA
XM_037198784.1	3476	1.78	1.15	1	1.14	11.69	0.0273	Lysmd4	LysM domain containing 4 (Lysmd4), transcript variant X1, mRNA
XM_037206113.1	3226	1.3	-9.23	0.048	0.32	30.35	0.0276	Kifc3	kinesin family member C3 (Kifc3), transcript variant X8, mRNA
XM_028854345.2	2153	6.23	-1.28	1	20.42	4.81	0.0276	LOC114681071	acylcarnitine hydrolase-like (LOC114681071), mRNA
XM_028873558.2	1914	0.05	2.59	1	0.21	-195.24	0.0276	Tmem260	transmembrane protein 260 (Tmem260), transcript variant X4, mRNA
XM_037211938.1	4448	0	NaN	NaN	0.28	-47.03	0.0276	Itga7	integrin subunit alpha 7 (Itga7), transcript variant X2, mRNA
XM_028862678.2	10926	0.36	4.23	0.402	0.15	238.9	0.0277	Akap9	A-kinase anchoring protein 9 (Akap9), transcript variant X12, mRNA
XM_028883253.2	7908	1.56	1.23	1	1.62	6.9	0.0277	Sptan1	spectrin alpha, non-erythrocytic 1 (Sptan1), transcript variant X4, mRNA
XM_037201548.1	1250	0.51	1.27	1	0.88	243.2	0.0277	Hagh	hydroxyacylglutathione hydrolase (Hagh), transcript variant X7, mRNA
XM_037205203.1	2319	0.11	2.88	1	0.45	228.14	0.0277	Znf2	zinc finger protein 2 (Znf2), transcript variant X2, mRNA
XM_028880644.2	5164	0.44	1.58	1	0.25	95.76	0.0278	Ripor2	RHO family interacting cell polarization regulator 2 (Ripor2), transcript variant X4, mRNA
XM_028886406.2	2811	1.48	-1.37	1	0.46	223.83	0.0278	LOC114704899	putative P2Y purinoceptor 10 (LOC114704899), transcript variant X3, mRNA
XM_028891923.2	5308	0.17	-116.87	0.0205	0.13	-213.72	0.0278	Senp1	SUMO specific peptidase 1 (Senp1), transcript variant X1, mRNA
XM_037205353.1	7958	0	NaN	NaN	0.03	-233.92	0.0278	Cep250	centrosomal protein 250 (Cep250), transcript variant X2, mRNA
XM_028865278.2	2082	2.39	1.24	1	0.65	66.79	0.0279	Map2k6	mitogen-activated protein kinase kinase 6 (Map2k6), transcript variant X1, mRNA
XM_037205292.1	1965	0.21	-1.23	1	0.64	107.01	0.0279	Fam110a	family with sequence similarity 110 member A (Fam110a), transcript variant X2, mRNA
XM_037208034.1	10403	0.01	-1.6	1	0.09	-276.74	0.0279	Acvr2b	activin A receptor type 2B (Acvr2b), transcript variant X2, mRNA
XM_037197698.1	3031	0.88	1.14	1	0.35	228.44	0.028	Tnfrsf13c	TNF receptor superfamily member 13C (Tnfrsf13c), transcript variant X3, mRNA
XM_037206957.1	2837	0.44	4.15	0.811	0.59	343.2	0.028	Phtf1	putative homeodomain transcription factor 1 (Phtf1), transcript variant X3, mRNA
XM_037203488.1	4889	0.07	3.92	0.924	0.33	-36.4	0.0281	Cadps2	calcium dependent secretion activator 2 (Cadps2), transcript variant X10, mRNA
XM_037210828.1	7161	0.41	2.55	0.965	0.38	413.7	0.0281	Bcl11b	BAF chromatin remodeling complex subunit BCL11B (Bcl11b), transcript variant X5, mRNA
XM_028885804.2	7383	0.2	-1.21	1	0.26	48.37	0.0281	Mphosph9	M-phase phosphoprotein 9 (Mphosph9), transcript variant X5, mRNA
XM_037204277.1	5176	0.48	723.91	0.00466	0.41	19.07	0.0281	Brpf1	bromodomain and PHD finger containing 1 (Brpf1), transcript variant X8, mRNA
XM_028875869.2	2553	0.16	-17.87	0.261	0.08	-214.8	0.0281	Btbd10	BTB domain containing 10 (Btbd10), transcript variant X3, mRNA
XM_028855247.2	4496	0.18	1.35	1	0.29	254.84	0.0281	Arhgap33	Rho GTPase activating protein 33 (Arhgap33), transcript variant X3, mRNA
XM_028865263.2	2802	0.58	-1.11	1	5.97	-7.01	0.0281	Fam20a	FAM20A golgi associated secretory pathway pseudokinase (Fam20a), mRNA
XM_037205318.1	3701	0.23	1.39	1	0.11	-74.95	0.0281	LOC114705546	DNA (cytosine-5)-methyltransferase 3B (LOC114705546), transcript variant X7, mRNA
XM_037202924.1	3359	43.45	-1.06	1	256.47	3.34	0.0282	Csf3r	colony stimulating factor 3 receptor (Csf3r), transcript variant X2, mRNA
XM_028873179.2	1663	0.4	-1.69	1	1.26	342.91	0.0283	Enoph1	enolase-phosphatase 1 (Enoph1), transcript variant X2, mRNA
XM_037197323.1	1476	0.68	-319	0.0198	0.83	260.24	0.0284	Tarbp2	TARBP2 subunit of RISC loading complex (Tarbp2), transcript variant X1, mRNA
XM_028875154.2	3021	1.03	-4.86	0.351	3.08	6.89	0.0284	Vwa2	von Willebrand factor A domain containing 2 (Vwa2), mRNA
XM_028894435.2	3092	0.06	3.52	0.872	206.25	-26.98	0.0288	Serpine1	serpin family E member 1 (Serpine1), transcript variant X1, mRNA
XM_028877156.2	10840	0.46	1.91	1	0.19	54.87	0.0288	Klf12	Kruppel like factor 12 (Klf12), transcript variant X2, mRNA
XM_028882366.1	2757	0.15	-1.32	1	0.58	87.86	0.0288	Zbtb49	zinc finger and BTB domain containing 49 (Zbtb49), transcript variant X2, mRNA
XM_028890548.2	779	1.74	1.78	1	21.92	-4.43	0.0288	Ccl4	C-C motif chemokine 4-like (LOC114707727), mRNA
XM_037211692.1	3425	0.78	-1.58	1	2.12	9.96	0.0288	Mtus1	microtubule associated scaffold protein 1 (Mtus1), transcript variant X4, mRNA
XM_037206358.1	6651	0.21	-1.15	1	0.3	406.71	0.0288	Sipa1l2	signal induced proliferation associated 1 like 2 (Sipa1l2), transcript variant X2, mRNA
XM_028891012.1	1528	2.56	8.7	0.204	0.53	-25.08	0.0289	Ckmt2	creatine kinase, mitochondrial 2 (Ckmt2), mRNA
XM_037204274.1	5461	0.02	3.75	1	0.23	269.45	0.0291	Brpf1	bromodomain and PHD finger containing 1 (Brpf1), transcript variant X1, mRNA
XM_028866654.2	6133	0.3	-133.92	0.00319	0.39	364.91	0.0291	Qki	QKI, KH domain containing RNA binding (Qki), transcript variant X5, mRNA
XR_005090527.1	1327	27.17	3.81	0.0844	7.18	7.79	0.0292	LOC119087082	uncharacterized LOC119087082 (LOC119087082), ncRNA
XM_028890773.2	10275	7.93	1.14	1	8.23	2.4	0.0292	Ash1l	ASH1 like histone lysine methyltransferase (Ash1l), transcript variant X2, mRNA
XM_028868914.2	7445	0	NaN	NaN	0.1	-202.97	0.0292	Spag9	sperm associated antigen 9 (Spag9), transcript variant X6, mRNA
XM_028857606.2	8774	3.14	1.59	0.315	3.61	3.82	0.0292	Klhl24	kelch like family member 24 (Klhl24), transcript variant X2, mRNA
XM_037203018.1	1393	2.75	1098.12	0.00659	0.79	258.25	0.0293	Med18	mediator complex subunit 18 (Med18), transcript variant X2, mRNA
XM_028855410.2	4118	2.81	2.53	0.231	0.74	443.41	0.0293	Smarcc2	SWI/SNF related, matrix associated, actin dependent regulator of chromatin subfamily c member 2 (Smarcc2), transcript variant X6, mRNA
XM_028873437.2	3691	2.01	-1.95	1	11.8	3.34	0.0293	Picalm	phosphatidylinositol binding clathrin assembly protein (Picalm), transcript variant X15, mRNA
XM_037203995.1	2441	0.44	-1.5	1	0.22	-169.04	0.0293	Dnai7	cilia and flagella associated protein 94 (Cfap94), transcript variant X5, mRNA
XM_028870104.2	2143	0	NaN	NaN	0.09	-176.91	0.0293	Limk1	LIM domain kinase 1 (Limk1), transcript variant X3, mRNA
XM_028889910.2	2537	1.38	-1.04	1	0.37	-228.1	0.0295	Arhgef6	Rac/Cdc42 guanine nucleotide exchange factor 6 (Arhgef6), transcript variant X2, mRNA
XM_028884876.2	3450	0.48	-466.84	0.00712	0.35	255.45	0.0295	Znf329	zinc finger protein 329 (Znf329), transcript variant X2, mRNA
XM_037205447.1	9398	0.4	-1.19	1	0.14	240.5	0.0297	Znf831	zinc finger protein 831 (Znf831), transcript variant X3, mRNA
XM_037205868.1	5272	48.41	1.05	1	86.46	3.15	0.0298	Ripor2	RHO family interacting cell polarization regulator 2 (Ripor2), transcript variant X2, mRNA
XM_028883849.2	2948	0.05	-1.82	1	0.19	-164.81	0.0299	Ints10	integrator complex subunit 10 (Ints10), transcript variant X11, mRNA
XM_037206869.1	4233	0.24	-313.03	0.0342	0.29	65.86	0.0299	Rfx5	regulatory factor X5 (Rfx5), transcript variant X1, mRNA
XM_028875936.2	6410	0.22	2.14	1	0.12	-40.84	0.0299	Bcor	BCL6 corepressor (Bcor), transcript variant X5, mRNA
XM_028884824.2	10328	0.05	-3.51	0.923	0.06	-48.2	0.03	Mast4	microtubule associated serine/threonine kinase family member 4 (Mast4), transcript variant X10, mRNA
XM_028868484.2	1285	16.22	-1.25	1	39.74	-3.62	0.03	Cd40	CD40 molecule (Cd40), transcript variant X1, mRNA
XM_037198172.1	3510	0.52	-1.42	1	0.69	391.37	0.03	Tmem18	transmembrane protein 18 (Tmem18), transcript variant X2, mRNA
XM_028865613.2	7965	5.99	1.5	0.742	8.07	-3.17	0.03	Spta1	spectrin alpha, erythrocytic 1 (Spta1), mRNA
XM_037203888.1	744	0.18	-8.75	NaN	0.64	-46	0.03	Nfu1	NFU1 iron-sulfur cluster scaffold (Nfu1), transcript variant X4, mRNA
XM_028878620.2	950	14.18	1.13	1	17.11	-4.44	0.0301	Rgcc	regulator of cell cycle (Rgcc), transcript variant X2, mRNA
XM_028880009.1	7886	0.98	1.18	1	4.31	5.03	0.0301	Rapgef6	Rap guanine nucleotide exchange factor 6 (Rapgef6), transcript variant X12, mRNA
XM_037204225.1	6069	0.35	-1.74	1	0.12	-198.05	0.0301	Ankrd30a	ankyrin repeat domain 30A (Ankrd30a), transcript variant X1, mRNA
XM_037200071.1	1816	0.18	-88.61	0.0937	0.41	-48.56	0.0302	LOC114705831	heterogeneous nuclear ribonucleoprotein L-like (LOC114705831), mRNA
XM_028873188.2	1073	8.89	1.09	1	134.29	-8.65	0.0302	Cxcl13	C-X-C motif chemokine ligand 13 (Cxcl13), mRNA
XM_037197412.1	2445	0.6	-2.04	1	0.2	-73.17	0.0302	Pus7l	pseudouridine synthase 7 like (Pus7l), transcript variant X2, mRNA
XM_037210829.1	1747	0.35	-1.23	1	0.27	-64.18	0.0302	Kdm8	lysine demethylase 8 (Kdm8), transcript variant X1, mRNA
XM_037211174.1	2826	7.9	1.07	1	10.18	3.45	0.0304	Lbr	lamin B receptor (Lbr), transcript variant X3, mRNA
XM_028866139.2	4140	3.11	-1.16	1	1.81	-4.77	0.0305	Cald1	caldesmon 1 (Cald1), transcript variant X9, mRNA
XM_028892250.2	2805	0.19	1.35	1	0.32	-266.17	0.0305	Acin1	apoptotic chromatin condensation inducer 1 (Acin1), transcript variant X2, mRNA
XM_028888879.2	1818	11.56	-1.66	0.783	58.95	-10.77	0.0306	Vsig4	V-set and immunoglobulin domain containing 4 (Vsig4), mRNA
XM_028865764.2	1725	0.03	-3.02	NaN	0.97	41.44	0.0306	Creg2	cellular repressor of E1A stimulated genes 2 (Creg2), mRNA
XM_028894489.2	6847	0.91	3.29	0.928	0.21	261.56	0.0306	Atxn7	ataxin 7 (Atxn7), transcript variant X2, mRNA
XM_028854858.2	5550	0.26	1.24	1	0.19	-261.8	0.0307	LOC114681372	F-box-like/WD repeat-containing protein TBL1X (LOC114681372), transcript variant X10, mRNA
XM_037201132.1	3786	29.52	1.13	1	47.26	2.89	0.0307	Msl1	MSL complex subunit 1 (Msl1), transcript variant X3, mRNA
XR_005089985.1	3467	0.37	-1.2	1	0.33	25.66	0.0307	Elk1	ETS transcription factor ELK1 (Elk1), transcript variant X4, misc_RNA
XM_028854590.2	2929	0.43	1.21	1	7.27	4.03	0.0307	Ccdc154	coiled-coil domain containing 154 (Ccdc154), transcript variant X8, mRNA
XM_028891000.2	7370	4.65	-1.86	0.896	31.47	7.82	0.0308	Tns3	tensin 3 (Tns3), transcript variant X6, mRNA
XM_028883832.2	5211	0.25	-1.13	1	0.87	206.51	0.0308	Lzts1	leucine zipper tumor suppressor 1 (Lzts1), transcript variant X1, mRNA
XM_028853864.2	2615	5.89	-1.74	0.426	11.64	3.2	0.031	Traf7	TNF receptor associated factor 7 (Traf7), transcript variant X6, mRNA
XM_028865264.2	6092	0	NaN	NaN	0.11	-194.76	0.031	Abca9	ATP binding cassette subfamily A member 9 (Abca9), transcript variant X1, mRNA
XM_037210810.1	6624	0.05	-1.1	1	0.09	-80.66	0.0311	Dicer1	dicer 1, ribonuclease III (Dicer1), transcript variant X6, mRNA
XM_028876535.2	2492	1.21	-1.17	1	1.96	-7.75	0.0312	Tmcc2	transmembrane and coiled-coil domain family 2 (Tmcc2), transcript variant X2, mRNA
XM_028864824.2	2995	0.34	-108.68	0.0197	0.31	-271.45	0.0312	Slain1	SLAIN motif family member 1 (Slain1), transcript variant X4, mRNA
XM_037206946.1	2669	7.84	3.56	0.394	19.82	4.33	0.0312	Sike1	suppressor of IKBKE 1 (Sike1), transcript variant X2, mRNA
XM_028875997.2	429	3.98	-1.04	1	3.16	-299.66	0.0312	LOC114697706	SRA stem-loop interacting RNA binding protein (LOC114697706), mRNA
XM_037208883.1	6365	0.1	-1.45	1	0.24	87.37	0.0312	Kiaa0232	KIAA0232 ortholog (Kiaa0232), transcript variant X5, mRNA
XM_028888688.2	5020	0.61	2.41	1	0.51	437.63	0.0313	Zfyve9	zinc finger FYVE-type containing 9 (Zfyve9), transcript variant X1, mRNA
XM_028868724.2	4599	0.33	412.31	0.0307	0.48	45.23	0.0313	Ndor1	NADPH dependent diflavin oxidoreductase 1 (Ndor1), transcript variant X4, mRNA
XM_028856075.2	2098	2.1	-1.33	1	0.65	286.81	0.0313	Ndrg2	NDRG family member 2 (Ndrg2), transcript variant X1, mRNA
XM_028887652.2	879	0.8	-1.46	1	1.07	190.89	0.0316	Tmem234	transmembrane protein 234 (Tmem234), transcript variant X2, mRNA
XM_037199811.1	4941	2.04	1.05	1	9.42	4.64	0.032	Il18rap	interleukin 18 receptor accessory protein (LOC114690863), transcript variant X1, mRNA
XM_037203174.1	2635	0.81	1.21	1	0.46	47.39	0.0321	Mthfr	methylenetetrahydrofolate reductase (Mthfr), transcript variant X3, mRNA
XM_028886988.2	5339	0.14	-174.16	0.0701	0.11	-186.85	0.0321	Dag1	dystroglycan 1 (Dag1), transcript variant X5, mRNA
XM_028857336.2	4682	0.19	1.53	1	0.27	270.53	0.0322	Pnpla6	patatin like phospholipase domain containing 6 (Pnpla6), transcript variant X6, mRNA
XM_037201166.1	1411	1.88	-2.02	0.992	11.4	-10.71	0.0324	LOC114706371	T-cell immunoglobulin and mucin domain-containing protein 4-like (LOC114706371), mRNA
XM_037200482.1	3421	0.81	1.09	1	0.58	378.22	0.0324	L3mbtl3	L3MBTL histone methyl-lysine binding protein 3 (L3mbtl3), transcript variant X7, mRNA
XM_037207836.1	1601	0	NaN	NaN	1.27	317.38	0.0324	Plscr2	phospholipid scramblase 2 (LOC114690952), transcript variant X3, mRNA
XM_028873777.1	1165	1.6	1.27	1	1.17	291.3	0.0325	Sec11a	SEC11 homolog A, signal peptidase complex subunit (Sec11a), transcript variant X1, mRNA
XM_028876305.2	3968	31.14	1.11	1	12.63	2.86	0.0329	Arl4c	ADP ribosylation factor like GTPase 4C (Arl4c), mRNA
XM_028895024.2	1772	0.3	1.83	1	3.25	-11.99	0.033	Rag2	recombination activating 2 (Rag2), mRNA
XM_037209627.1	5527	4.02	-1.14	1	9.85	3.11	0.033	Hlcs	holocarboxylase synthetase (Hlcs), transcript variant X2, mRNA
XM_037211130.1	1913	1.44	1.89	1	3.29	-6.15	0.033	Atf3	activating transcription factor 3 (Atf3), transcript variant X1, mRNA
XM_028861399.2	4337	15.76	-1.3	1	11.83	7.01	0.0331	Leng8	leukocyte receptor cluster member 8 (Leng8), transcript variant X1, mRNA
XM_037199010.1	7577	0.15	-8.75	0.311	1.66	15.01	0.0331	Tmem164	transmembrane protein 164 (Tmem164), transcript variant X6, mRNA
XM_028872161.2	8538	0.16	-1.01	1	0.05	-78.53	0.0331	LOC114695021	activating transcription factor 7 interacting protein (LOC114695021), transcript variant X1, mRNA
XM_028876904.2	7670	0.21	2.73	1	0.15	234.74	0.0332	Amot	angiomotin (Amot), transcript variant X1, mRNA
XM_037198378.1	4454	0.08	1.13	1	0.09	-43.73	0.0333	Mtus2	microtubule associated scaffold protein 2 (Mtus2), transcript variant X2, mRNA
XM_037205759.1	6962	0.09	1.05	1	0.29	-29.92	0.0333	Kif13a	kinesin family member 13A (Kif13a), transcript variant X2, mRNA
XM_028875934.2	6379	1.72	-1.31	1	0.48	435.62	0.0334	Bcor	BCL6 corepressor (Bcor), transcript variant X3, mRNA
XM_037209604.1	3004	1.85	-2.73	0.933	5.94	6.42	0.0334	Itgb2l	integrin beta-2-like protein (LOC114700344), transcript variant X1, mRNA
XM_037198780.1	9499	7.89	-1.18	1	13.11	3.1	0.0334	Nhsl2	NHS like 2 (Nhsl2), mRNA
XM_028879797.2	3470	1.23	1.82	0.985	0.45	36.39	0.0334	Ptpn4	protein tyrosine phosphatase non-receptor type 4 (Ptpn4), transcript variant X2, mRNA
XM_037200005.1	6769	0.23	-1.08	1	0.15	205.45	0.0334	Bicral	BRD4 interacting chromatin remodeling complex associated protein like (Bicral), transcript variant X1, mRNA
XM_028878835.2	1369	12.7	-1.17	1	15.01	-3.78	0.0335	C1qtnf4	C1q and TNF related 4 (C1qtnf4), mRNA
XM_028881568.2	1058	1.01	2.35	1	0.98	185.51	0.0335	LOC114701459	killer cell lectin-like receptor subfamily E member 1 (LOC114701459), transcript variant X2, mRNA
XM_037210628.1	21686	4.16	-1.18	1	4.39	2.73	0.0336	Syne2	spectrin repeat containing nuclear envelope protein 2 (Syne2), transcript variant X8, mRNA
XM_028859154.2	4449	0.4	-2.99	0.842	0.52	43.92	0.0337	Plekhg2	pleckstrin homology and RhoGEF domain containing G2 (Plekhg2), transcript variant X1, mRNA
XM_037208623.1	3121	1.05	3.02	0.647	0.83	358.89	0.0338	Ppp3cb	protein phosphatase 3 catalytic subunit beta (Ppp3cb), transcript variant X6, mRNA
XM_037205354.1	7949	0.08	1.05	1	0.06	-167.05	0.0338	Cep250	centrosomal protein 250 (Cep250), transcript variant X4, mRNA
XM_028878985.2	10623	0.07	1.06	1	0.09	-275.8	0.0338	Zfp862	zinc finger protein 862 (LOC114699722), transcript variant X1, mRNA
XM_028859970.2	2678	0.4	1.96	1	0.17	-56.01	0.0341	Lipe	lipase E, hormone sensitive type (Lipe), transcript variant X3, mRNA
XM_037202042.1	3225	0	NaN	NaN	0.05	-167.84	0.0341	Cd22	CD22 molecule (Cd22), transcript variant X2, mRNA
XM_037204539.1	2893	0.68	-1.59	1	0.33	201.2	0.0342	Ttc16	tetratricopeptide repeat domain 16 (Ttc16), transcript variant X2, mRNA
XM_028880418.2	1385	0.91	-72.67	0.0261	0.45	-178.48	0.0342	Tuba8	tubulin alpha 8 (Tuba8), transcript variant X3, mRNA
XM_037210573.1	3056	0.03	3.43	1	0.21	-179.33	0.0344	Mis18bp1	MIS18 binding protein 1 (Mis18bp1), transcript variant X3, mRNA
XM_028873197.1	1678	3.15	1543.89	0.000662	0.7	266.72	0.0346	Acot9	acyl-CoA thioesterase 9 (Acot9), transcript variant X2, mRNA
XR_005092530.1	1634	1.73	-1.45	1	2.38	10.76	0.0347	LOC119088797	uncharacterized LOC119088797 (LOC119088797), transcript variant X3, ncRNA
XM_028868560.2	1745	3.34	1.05	1	1.11	21.2	0.0349	LOC114692653	phospholysine phosphohistidine inorganic pyrophosphate phosphatase (LOC114692653), transcript variant X2, mRNA
XM_028871940.2	2504	2.35	-1.35	1	108.86	-4.11	0.035	Lipg	lipase G, endothelial type (Lipg), transcript variant X1, mRNA
XM_037206734.1	1682	1.76	-2.72	1	1.34	-37.32	0.0351	Fcrl2	Fc receptor-like protein 2 (LOC114685824), transcript variant X6, mRNA
XM_028886239.2	2286	22.28	1.55	0.53	36.95	-2.83	0.0352	Hspd1	heat shock protein family D (Hsp60) member 1 (Hspd1), transcript variant X1, mRNA
XM_028856988.2	5200	0.16	1.59	1	0.21	94.04	0.0352	Ulk1	unc-51 like autophagy activating kinase 1 (Ulk1), transcript variant X4, mRNA
XM_028871474.2	10631	0.13	-2.76	0.931	0.12	50.36	0.0354	Nup93	nucleoporin 93 (Nup93), transcript variant X3, mRNA
XM_037206345.1	1833	0.83	-1.97	1	0.76	261.82	0.0355	Cdk10	cyclin dependent kinase 10 (Cdk10), transcript variant X4, mRNA
XM_037197092.1	2839	5.74	-1.47	0.854	4.25	5.71	0.0356	Relt	RELT TNF receptor (Relt), transcript variant X5, mRNA
XM_028878448.2	5253	0.26	1.81	1	0.09	-43.79	0.0356	Hdac9	histone deacetylase 9 (Hdac9), transcript variant X17, mRNA
XM_028856126.2	854	2.36	3.59	0.815	13.73	-8.88	0.0357	LOC114682271	eosinophil cationic protein-like (LOC114682271), mRNA
XM_037197073.1	1582	0.45	2.88	1	0.1	-187.56	0.0358	Sil1	SIL1 nucleotide exchange factor (Sil1), transcript variant X2, mRNA
XM_037208914.1	5872	0.19	304.8	0.0445	0.16	225.56	0.0358	Ccdc88a	coiled-coil domain containing 88A (Ccdc88a), transcript variant X2, mRNA
XM_028869176.2	4057	0.56	-1.25	1	0.27	40.56	0.0358	Ppp6r2	protein phosphatase 6 regulatory subunit 2 (Ppp6r2), transcript variant X7, mRNA
XM_037198937.1	1417	0.18	-22.48	0.277	0.23	-180.59	0.0359	LOC114704877	TBC1 domain family member 20-like (LOC114704877), transcript variant X1, mRNA
XM_028879029.1	1298	0.05	5.36	NaN	0.21	-24.76	0.0359	LOC114699758	heterogeneous nuclear ribonucleoprotein A1-like (LOC114699758), mRNA
XM_028859293.1	1006	1.98	-2.64	0.847	0.75	-253.04	0.0359	Eef1d	eukaryotic translation elongation factor 1 delta (Eef1d), transcript variant X11, mRNA
XM_037204544.1	2457	0.07	1.16	1	0.07	-185.86	0.0359	Ttc16	tetratricopeptide repeat domain 16 (Ttc16), transcript variant X7, mRNA
XM_028855922.2	1548	31.49	-1.1	1	40.96	3.22	0.036	Trh	thyrotropin releasing hormone (Trh), mRNA
XM_028879069.2	4016	3.67	-1.14	1	12.46	4.66	0.036	Kirrel3	kirre like nephrin family adhesion molecule 3 (Kirrel3), transcript variant X2, mRNA
XM_037200198.1	6836	0.18	65.68	0.00907	0.1	-244.41	0.036	Col11a2	collagen type XI alpha 2 chain (Col11a2), transcript variant X8, mRNA
XM_028870983.2	1926	0.29	-10.23	0.26	0.21	-158.64	0.036	Cdkn1c	cyclin dependent kinase inhibitor 1C (Cdkn1c), transcript variant X6, mRNA
XM_028877768.2	2623	0.56	-1.53	1	0.29	-294.37	0.036	Cep89	centrosomal protein 89 (Cep89), transcript variant X2, mRNA
XM_037208425.1	3227	0.52	1.4	1	0.97	-9.97	0.036	LOC114702713	syncytin-B (LOC114702713), transcript variant X3, mRNA
XM_028865965.2	3494	13.45	-1.2	0.98	32.42	2.62	0.0362	Tbc1d2b	TBC1 domain family member 2B (Tbc1d2b), transcript variant X1, mRNA
XM_028890821.2	3509	0.58	-1.53	1	0.37	63.41	0.0363	Trim46	tripartite motif containing 46 (Trim46), transcript variant X2, mRNA
XM_037202167.1	1860	8.43	1.72	0.593	5.86	6.51	0.0365	LOC114689433	killer cell immunoglobulin-like receptor 3DL1 (LOC114689433), mRNA
XM_037197546.1	868	0.85	-1.24	1	1.75	27.79	0.0365	Ptp4a3	protein tyrosine phosphatase 4A3 (Ptp4a3), transcript variant X4, mRNA
XM_037201359.1	8588	0.41	1.12	1	0.2	297.78	0.0365	Ncor1	nuclear receptor corepressor 1 (Ncor1), transcript variant X2, mRNA
XM_037205727.1	4436	43.64	1.13	1	94.38	3.58	0.0367	Sema4d	semaphorin 4D (Sema4d), transcript variant X2, mRNA
XM_037206900.1	1506	1.02	145.33	0.0133	2.46	-18.12	0.0368	Ecm1	extracellular matrix protein 1 (Ecm1), transcript variant X3, mRNA
XM_028858933.2	1707	0.44	-1.18	1	0.43	-178.55	0.0368	Akt1s1	AKT1 substrate 1 (Akt1s1), transcript variant X7, mRNA
XM_028882679.2	5229	1.29	3.2	0.709	0.46	398.66	0.0369	Kansl1	KAT8 regulatory NSL complex subunit 1 (Kansl1), transcript variant X2, mRNA
XM_028874866.2	3864	0.89	6.02	0.436	0.38	82.05	0.0369	Tle4	TLE family member 4, transcriptional corepressor (Tle4), transcript variant X14, mRNA
XM_028883734.1	2441	0.59	1.9	1	0.65	46.5	0.0371	Klc1	kinesin light chain 1 (Klc1), transcript variant X8, mRNA
XM_028871133.2	3211	1.28	1.76	1	0.98	14.09	0.0372	Pla2g6	phospholipase A2 group VI (Pla2g6), transcript variant X1, mRNA
XM_028884079.2	1394	24.87	-1.05	1	12.46	4.32	0.0372	Sit1	signaling threshold regulating transmembrane adaptor 1 (Sit1), mRNA
XR_005090253.1	4115	0.53	6.74	0.269	0.26	188.35	0.0373	Scaf8	SR-related CTD associated factor 8 (Scaf8), transcript variant X4, misc_RNA
XM_028864468.2	2220	0.77	1.5	1	0.55	65.21	0.0373	Zbtb37	zinc finger and BTB domain containing 37 (Zbtb37), transcript variant X1, mRNA
XM_037208758.1	9136	0.01	-3.63	1	0.18	108.21	0.0373	Cacna1d	calcium voltage-gated channel subunit alpha1 D (Cacna1d), transcript variant X6, mRNA
XM_028879718.2	2974	0.64	1.37	1	0.8	339.72	0.0374	Znf184	zinc finger protein 184 (Znf184), transcript variant X1, mRNA
XM_028857574.2	7318	2.95	-1.08	1	4.02	3.07	0.0375	Abcc5	ATP binding cassette subfamily C member 5 (Abcc5), transcript variant X5, mRNA
XM_028869022.2	2048	0.04	-3.99	NaN	0.08	-138.19	0.0375	Hoxb5	homeobox B5 (Hoxb5), mRNA
XM_028857353.2	2736	0.25	-2.14	1	0.27	-272.32	0.0376	Xab2	XPA binding protein 2 (Xab2), transcript variant X2, mRNA
XM_028855489.2	5279	1.42	1.01	1	0.81	10.36	0.0379	Eogt	EGF domain specific O-linked N-acetylglucosamine transferase (Eogt), transcript variant X1, mRNA
XM_037197223.1	2646	1.2	1.06	1	0.45	213.31	0.0379	LOC114696273	myelin basic protein (LOC114696273), transcript variant X5, mRNA
XM_037199612.1	3876	0.11	-1.42	1	0.06	-175.14	0.0379	Actn4	actinin alpha 4 (Actn4), transcript variant X7, mRNA
XM_028874984.2	4542	0.21	1.15	1	0.2	188.78	0.038	Pfkfb2	6-phosphofructo-2-kinase/fructose-2,6-biphosphatase 2 (Pfkfb2), transcript variant X11, mRNA
XM_028855049.2	1601	0.7	72.14	0.179	0.31	-59.22	0.0381	C1H19orf54	chromosome 1 C19orf54 homolog (C1H19orf54), transcript variant X2, mRNA
XM_037198453.1	4226	0.17	-16.64	0.198	0.23	-289.82	0.0382	Sun1	Sad1 and UNC84 domain containing 1 (Sun1), transcript variant X2, mRNA
XM_037202236.1	4747	0.13	-2.43	1	0.23	208.34	0.0383	Zfp160	zinc finger protein 160-like (LOC114688235), transcript variant X4, mRNA
XM_037209198.1	2430	0.42	-1.68	1	0.16	-38.88	0.0384	Deaf1	DEAF1 transcription factor (Deaf1), transcript variant X6, mRNA
XM_037201341.1	2011	0.27	-27.86	0.113	0.19	-173.31	0.0384	LOC114700428	fatty acid hydroxylase domain-containing protein 2-like (LOC114700428), transcript variant X3, mRNA
XM_028885869.2	5363	1.04	1.62	1	0.23	47.87	0.0384	Kdm2b	lysine demethylase 2B (Kdm2b), transcript variant X6, mRNA
XM_037198076.1	2862	6.64	3.45	0.161	6.14	12.91	0.0384	Rab10	RAB10, member RAS oncogene family (Rab10), transcript variant X2, mRNA
XM_028870127.2	3943	0.67	1.75	1	0.25	-278.58	0.0384	Gtf2i	general transcription factor IIi (Gtf2i), transcript variant X13, mRNA
XM_028888951.2	2747	0.08	3.33	0.765	0.49	18	0.0387	Rbm39	RNA binding motif protein 39 (Rbm39), transcript variant X6, mRNA
XM_028867418.2	10811	0.17	-2.01	1	0.14	225.7	0.0387	Rora	RAR related orphan receptor A (Rora), transcript variant X2, mRNA
XM_037203873.1	732	0.6	-8.47	0.44	0.65	-141.74	0.0389	Tprkb	TP53RK binding protein (Tprkb), transcript variant X4, mRNA
XM_028859304.2	2437	0.43	2.17	1	0.42	210.03	0.039	Znf623	zinc finger protein 623 (Znf623), transcript variant X3, mRNA
XM_037198047.1	3503	0.33	300.18	0.038	3.33	5.98	0.039	Nlrc4	NLR family CARD domain containing 4 (Nlrc4), transcript variant X2, mRNA
XM_037210334.1	6821	0.07	1.46	1	0.21	234.11	0.0391	Creb1	cAMP responsive element binding protein 1 (Creb1), transcript variant X3, mRNA
XM_037199082.1	3946	0.26	1.92	1	0.26	182.92	0.0393	Znf182	zinc finger protein 182 (Znf182), transcript variant X9, mRNA
XR_005090603.1	3546	0.42	-1.45	1	0.22	162.73	0.0393	LOC114689254	UL16-binding protein 1-like (LOC114689254), transcript variant X3, misc_RNA
XM_028882783.2	4328	0.93	1.03	1	5.16	5.15	0.0396	Coro2a	coronin 2A (Coro2a), transcript variant X4, mRNA
XM_028893774.2	4966	0	NaN	NaN	0.12	-160.94	0.0397	Mtdh	metadherin (Mtdh), transcript variant X1, mRNA
XM_037203624.1	920	2.45	-1.16	1	19.52	3.76	0.0398	Clec5a	C-type lectin domain containing 5A (Clec5a), transcript variant X3, mRNA
XM_037206883.1	2873	35.1	-1.08	1	27.03	2.53	0.0398	Cdc42se1	CDC42 small effector 1 (Cdc42se1), transcript variant X4, mRNA
XM_037198577.1	3877	0.29	1.49	1	0.24	176.85	0.0399	Fbrsl1	fibrosin like 1 (Fbrsl1), transcript variant X3, mRNA
XM_037202444.1	2343	0.64	-1.27	1	0.62	285.04	0.0399	Tgs1	trimethylguanosine synthase 1 (Tgs1), transcript variant X2, mRNA
XM_028878673.2	5473	0.64	-1.44	1	0.32	368.72	0.04	Ttbk2	tau tubulin kinase 2 (Ttbk2), transcript variant X2, mRNA
XM_028879371.2	10589	0.12	1.4	1	0.11	205.33	0.04	Celsr2	cadherin EGF LAG seven-pass G-type receptor 2 (Celsr2), transcript variant X1, mRNA
XM_037204809.1	7991	0.36	3.02	0.551	0.19	105.85	0.0403	Baz2b	bromodomain adjacent to zinc finger domain 2B (Baz2b), transcript variant X7, mRNA
XM_037204109.1	3319	0.25	-3.43	0.964	0.37	83.59	0.0406	Foxm1	forkhead box M1 (Foxm1), transcript variant X3, mRNA
XM_028869629.2	3107	0.25	225.31	0.0419	0.15	-69.1	0.0408	Mdm1	Mdm1 nuclear protein (Mdm1), transcript variant X3, mRNA
XM_037200874.1	5559	0.15	1.59	1	0.21	32.22	0.0408	Cdk12	cyclin dependent kinase 12 (Cdk12), transcript variant X11, mRNA
XM_037210982.1	613	0.71	2.5	1	1.08	-26.46	0.0408	LOC114695095	40S ribosomal protein S14-like (LOC114695095), mRNA
XM_028859303.2	1774	0.02	2.08	NaN	0.14	-139.72	0.041	Rpl10l	ribosomal protein L10 like (Rpl10l), mRNA
XR_003735290.2	3407	0.33	340.54	0.0331	0.46	266.42	0.041	Casp2	caspase 2 (Casp2), transcript variant X2, misc_RNA
XM_028882905.2	2609	0.12	19.92	0.218	0.42	200.54	0.041	Cep55	centrosomal protein 55 (Cep55), transcript variant X3, mRNA
XM_028866302.2	6651	2.7	-1.24	1	3.53	-3.03	0.041	Ubash3b	ubiquitin associated and SH3 domain containing B (Ubash3b), transcript variant X1, mRNA
XM_028895143.2	6700	0	NaN	NaN	0.08	-161.49	0.0412	Mid2	midline 2 (Mid2), transcript variant X1, mRNA
XM_028890494.2	2474	0.45	2.5	1	0.12	-137.61	0.0413	Zkscan7	zinc finger protein with KRAB and SCAN domains 7-like (LOC114707685), transcript variant X2, mRNA
XM_028890460.1	6663	6.92	1.23	0.849	9.21	2.4	0.0414	Znf445	zinc finger protein 445 (Znf445), transcript variant X1, mRNA
XM_028882781.2	4883	4.28	-2.78	0.0101	17.08	2.97	0.0414	Tbc1d2	TBC1 domain family member 2 (Tbc1d2), transcript variant X2, mRNA
XM_028865796.2	4809	0.03	55.59	0.198	0.46	406.9	0.0415	Il1r1	interleukin 1 receptor type 1 (Il1r1), transcript variant X7, mRNA
XM_037208508.1	957	2.42	3.23	0.811	13.46	5.89	0.0415	Gzmb	granzyme B-like (LOC114689300), transcript variant X2, mRNA
XM_028877725.2	1953	0.15	-4.36	0.82	0.14	-142.39	0.0415	Plekhf1	pleckstrin homology and FYVE domain containing 1 (Plekhf1), transcript variant X2, mRNA
XM_028870281.2	1895	0.47	1.64	1	0.6	193.71	0.0415	Slc25a22	solute carrier family 25 member 22 (Slc25a22), transcript variant X5, mRNA
XM_028873088.2	9518	0.19	1.03	1	0.11	194.52	0.0415	Nav3	neuron navigator 3 (Nav3), transcript variant X7, mRNA
XM_028890540.2	735	0.28	1.18	1	12.99	-7.85	0.0415	Ccl4	C-C motif chemokine 4-like (LOC114707719), mRNA
XM_028892622.2	3583	0.6	1.34	1	0.24	-232.16	0.0415	Zfp709	zinc finger protein 709-like (LOC114709005), transcript variant X7, mRNA
XM_037199812.1	2106	0.68	1.45	1	0.4	44.83	0.0415	Pi16	peptidase inhibitor 16 (Pi16), transcript variant X1, mRNA
XM_037209712.1	2537	1.55	-1.41	1	4.77	-5.43	0.0415	Alcam	activated leukocyte cell adhesion molecule (Alcam), transcript variant X2, mRNA
XM_028889507.2	6477	4.5	-1.09	1	3.75	8.94	0.0417	Med1	mediator complex subunit 1 (Med1), transcript variant X1, mRNA
XM_037200122.1	5598	0.14	236.91	0.0415	0.17	240.45	0.0417	Paqr8	progestin and adipoQ receptor family member 8 (Paqr8), transcript variant X5, mRNA
XM_028877644.2	3468	0.13	9.03	0.371	0.33	83.58	0.0417	Rcbtb2	RCC1 and BTB domain containing protein 2 (Rcbtb2), transcript variant X7, mRNA
XM_028883994.2	10979	0.22	-3.59	0.945	0.1	231.81	0.0417	Phf24	PHD finger protein 24 (Phf24), transcript variant X4, mRNA
XM_037201525.1	2841	0.5	-1.04	1	0.76	56	0.0417	LOC114700410	proton-coupled amino acid transporter 1 (LOC114700410), transcript variant X3, mRNA
XM_028855593.2	6193	0	NaN	NaN	0.15	-18.49	0.0417	Epb41l1	erythrocyte membrane protein band 4.1 like 1 (Epb41l1), transcript variant X12, mRNA
XM_028886361.2	5276	12.72	1.42	0.362	9.2	2.64	0.0417	Sf3b1	splicing factor 3b subunit 1 (Sf3b1), transcript variant X2, mRNA
XM_028867636.2	2133	8.04	1.18	1	15.55	3.08	0.0417	LOC114692015	zinc finger protein 431-like (LOC114692015), mRNA
XM_028873050.2	6970	1.17	1.05	1	4.76	3.14	0.0417	Osbpl8	oxysterol binding protein like 8 (Osbpl8), transcript variant X6, mRNA
XM_037204132.1	1622	1.96	1.11	1	0.66	35.12	0.0417	Cd27	CD27 molecule (Cd27), transcript variant X1, mRNA
XM_028868082.2	5391	0.43	-480.15	0.0142	0.17	201.77	0.0418	Paqr8	progestin and adipoQ receptor family member 8 (Paqr8), transcript variant X9, mRNA
XM_037198963.1	5050	0.52	-1.96	1	0.23	42.85	0.042	Kdm6a	lysine demethylase 6A (Kdm6a), transcript variant X3, mRNA
XM_037200434.1	1339	1.01	-3.97	0.707	0.72	-27.14	0.042	Fam120b	family with sequence similarity 120B (Fam120b), transcript variant X6, mRNA
XM_028863660.2	12721	0.22	-1.74	1	0.2	416.59	0.042	Nsd1	nuclear receptor binding SET domain protein 1 (Nsd1), transcript variant X5, mRNA
XM_037197830.1	3639	0.51	-1.62	1	1.01	11.12	0.0421	Midn	midnolin (Midn), transcript variant X4, mRNA
XM_028859043.2	1635	12.28	-1.66	0.57	75.88	2.93	0.0422	Clec5a	C-type lectin domain containing 5A (Clec5a), transcript variant X1, mRNA
XR_005089604.1	1651	0.2	-1.06	1	0.65	209.14	0.0422	LOC119086344	uncharacterized LOC119086344 (LOC119086344), transcript variant X1, ncRNA
XM_028879378.2	6668	2.23	-1.83	0.28	6.99	3	0.0424	Sort1	sortilin 1 (Sort1), transcript variant X1, mRNA
XM_028889440.2	2055	0.35	-1.86	1	0.56	40.42	0.0424	Stard3	StAR related lipid transfer domain containing 3 (Stard3), transcript variant X2, mRNA
XM_037197222.1	2550	0.99	-1.51	1	0.44	195.03	0.0424	LOC114696273	myelin basic protein (LOC114696273), transcript variant X3, mRNA
XM_028866059.2	1106	0.43	-3.46	0.995	0.71	-26.93	0.0425	Tpm1	tropomyosin 1 (Tpm1), transcript variant X9, mRNA
XM_037197145.1	1727	0	NaN	NaN	0.14	-156.62	0.0425	Snx2	sorting nexin 2 (Snx2), transcript variant X1, mRNA
XM_037204873.1	1299	21.15	1.28	1	35.86	2.72	0.0426	LOC114703404	membrane-spanning 4-domains subfamily A member 6B-like (LOC114703404), transcript variant X2, mRNA
XM_028872380.2	1087	0	NaN	NaN	0.46	-161.14	0.0426	Tnnt3	troponin T3, fast skeletal type (Tnnt3), transcript variant X1, mRNA
XM_028889640.2	3758	0.01	-1.37	NaN	0.33	225.14	0.0426	Rufy3	RUN and FYVE domain containing 3 (Rufy3), transcript variant X2, mRNA
XM_028876502.2	6720	0.96	5.43	0.133	0.29	284.56	0.0426	Srgap2	SLIT-ROBO Rho GTPase activating protein 2 (Srgap2), transcript variant X1, mRNA
XM_028868649.2	2913	8.59	-1.79	0.182	6.9	3.89	0.0426	Fut7	fucosyltransferase 7 (Fut7), mRNA
XM_028869514.2	2822	0.2	-8.11	0.613	0.16	-35.22	0.0426	Dlg4	discs large MAGUK scaffold protein 4 (Dlg4), transcript variant X12, mRNA
XR_003733908.2	3202	0.34	-11.09	0.867	0.29	195.78	0.0426	LOC114689437	uncharacterized LOC114689437 (LOC114689437), transcript variant X1, ncRNA
XM_028875171.2	3208	6.21	-1.33	0.969	102.81	3.08	0.0426	Il1rap	interleukin 1 receptor accessory protein (LOC114697095), transcript variant X4, mRNA
XM_037197160.1	6230	1.37	-1.11	1	0.43	303.24	0.0426	Ndst1	N-deacetylase and N-sulfotransferase 1 (Ndst1), transcript variant X1, mRNA
XM_028880878.2	2640	0.04	3.81	NaN	0.17	-143.51	0.0426	Spg7	SPG7 matrix AAA peptidase subunit, paraplegin (Spg7), transcript variant X1, mRNA
XM_028875767.2	4390	0.25	1.39	1	0.28	191.64	0.0426	Znf770	zinc finger protein 770 (Znf770), transcript variant X2, mRNA
XM_028866090.2	1024	0.61	-1.42	1	0.44	-36.25	0.0427	Tpm1	tropomyosin 1 (Tpm1), transcript variant X18, mRNA
XM_028874559.2	3730	0.13	-2.59	1	0.11	-180.24	0.0427	Pou6f1	POU class 6 homeobox 1 (Pou6f1), transcript variant X3, mRNA
XM_028892030.2	5110	0.13	200.69	0.0407	0.09	-142.19	0.0429	Phka1	phosphorylase kinase regulatory subunit alpha 1 (Phka1), transcript variant X5, mRNA
XM_037196908.1	7094	0.26	1.08	1	0.17	226.35	0.0429	Numa1	nuclear mitotic apparatus protein 1 (Numa1), transcript variant X8, mRNA
XM_037205769.1	4429	0.16	-1.41	1	0.11	-156.8	0.0429	Mcur1	mitochondrial calcium uniporter regulator 1 (Mcur1), transcript variant X3, mRNA
XM_037208776.1	5356	0.19	1.6	1	0.12	-155.92	0.0429	LOC114702135	sarcolemma associated protein (LOC114702135), transcript variant X18, mRNA
XM_028880777.2	1123	0.01	-4.47	NaN	1.08	206.88	0.043	LOC114700934	bile salt sulfotransferase-like (LOC114700934), transcript variant X1, mRNA
XM_028890093.2	3465	0.47	-1.33	1	0.31	62.03	0.0431	Afap1l1	actin filament associated protein 1 like 1 (Afap1l1), transcript variant X1, mRNA
XM_037199809.1	1066	0.89	1.66	1	0.83	31.57	0.0431	LOC114686357	HLA class II histocompatibility antigen, DP beta 1 chain (LOC114686357), transcript variant X3, mRNA
XM_037201616.1	3164	8.65	-1	1	43.56	2.66	0.0431	Rara	retinoic acid receptor alpha (Rara), transcript variant X3, mRNA
XM_028878070.2	1108	8.21	1.25	1	3.75	11.23	0.0432	Esd	S-formylglutathione hydrolase (LOC114699144), transcript variant X1, mRNA
XM_037205569.1	3100	0.41	-1.29	1	0.6	342.48	0.0432	Stau1	staufen double-stranded RNA binding protein 1 (Stau1), transcript variant X2, mRNA
XM_028879337.2	3129	3.54	1.67	0.728	1.35	15.6	0.0433	Prpf38b	pre-mRNA processing factor 38B (Prpf38b), transcript variant X7, mRNA
XM_037199012.1	5120	0.37	1.44	1	29.22	3.1	0.0433	Tmem164	transmembrane protein 164 (Tmem164), transcript variant X8, mRNA
XM_028860005.2	2988	0.22	230.69	0.0429	0.35	188.94	0.0436	Znf574	zinc finger protein 574 (Znf574), transcript variant X3, mRNA
XM_037200383.1	5727	0.16	-2.84	0.924	0.7	-10.84	0.0437	Adgb	androglobin (Adgb), mRNA
XM_028857335.2	4679	0.67	4.01	0.761	0.39	307.25	0.0438	Pnpla6	patatin like phospholipase domain containing 6 (Pnpla6), transcript variant X5, mRNA
XM_028865585.2	1157	27.42	1.37	1	28.84	4.11	0.0438	Cd84	CD84 molecule (Cd84), mRNA
XM_037197952.1	2450	4.13	1.2	1	29.97	2.75	0.044	Pram1	PML-RARA regulated adaptor molecule 1 (Pram1), transcript variant X2, mRNA
XM_037210180.1	3567	0.33	2.9	1	0.48	312.66	0.044	Ddx11	DEAD/H-box helicase 11 (Ddx11), transcript variant X2, mRNA
XM_028876566.2	6772	2.4	-1.25	1	3.16	9.84	0.0441	Pik3c2b	phosphatidylinositol-4-phosphate 3-kinase catalytic subunit type 2 beta (Pik3c2b), transcript variant X1, mRNA
XM_037200153.1	11567	0.03	-13.43	0.269	0.02	-140.88	0.0441	Tnxb	tenascin XB (Tnxb), transcript variant X11, mRNA
XM_028858197.2	6556	0.08	-1.08	1	0.22	207.4	0.0441	Pdgfra	platelet derived growth factor receptor alpha (Pdgfra), transcript variant X2, mRNA
XM_028879829.2	4146	0.15	-1.75	1	0.14	-146.79	0.0441	Znf322	zinc finger protein 322 (Znf322), transcript variant X7, mRNA
XM_028894763.2	3123	0.91	1.24	1	0.6	321.18	0.0441	Rnf38	ring finger protein 38 (Rnf38), transcript variant X10, mRNA
XM_037209428.1	6959	0.16	1.77	1	0.13	188.26	0.0441	Parp8	poly(ADP-ribose) polymerase family member 8 (Parp8), transcript variant X3, mRNA
XR_005090753.1	1081	2.17	1.73	1	0.95	251.21	0.0441	LOC119087346	uncharacterized LOC119087346 (LOC119087346), transcript variant X1, ncRNA
XM_037211067.1	1430	0.01	3.73	NaN	0.44	-55.79	0.0441	Il19	interleukin 19 (Il19), transcript variant X3, mRNA
XM_028882357.2	4536	2.65	7.03	0.0172	2.56	17.78	0.0441	Evc	EvC ciliary complex subunit 1 (Evc), transcript variant X2, mRNA
XM_037206104.1	3514	0.22	-216.78	0.0352	0.63	57.46	0.0441	Adgrg1	adhesion G protein-coupled receptor G1 (Adgrg1), transcript variant X3, mRNA
XM_028868501.2	3178	0.06	1.23	1	0.09	-27.72	0.0441	Slc2a10	solute carrier family 2 member 10 (Slc2a10), mRNA
XM_028872275.2	1825	5.77	-1.14	1	19.13	-2.99	0.0441	Ifrd1	interferon related developmental regulator 1 (Ifrd1), transcript variant X1, mRNA
XM_037197069.1	2630	0.15	3.24	1	0.1	-136.92	0.0441	Cdc25c	cell division cycle 25C (Cdc25c), transcript variant X5, mRNA
XM_037209798.1	2976	8.28	-1.2	1	24.17	3.34	0.0441	Nrros	negative regulator of reactive oxygen species (Nrros), transcript variant X4, mRNA
XM_028888610.2	8246	7.04	-1.01	1	17.81	2.69	0.0442	Flna	filamin A (Flna), transcript variant X3, mRNA
XM_037200085.1	3712	0.66	-1.05	1	0.64	-7.4	0.0443	Bag6	BAG cochaperone 6 (Bag6), transcript variant X21, mRNA
XM_037204991.1	2191	0.59	-1.66	1	0.37	165.58	0.0443	LOC114703392	protein FAM111A-like (LOC114703392), transcript variant X3, mRNA
XM_028880552.2	9118	0.01	4.56	NaN	0.12	54.71	0.0444	Ptprg	protein tyrosine phosphatase receptor type G (Ptprg), transcript variant X3, mRNA
XM_028856042.2	3830	0.18	-2.93	1	0.27	183.94	0.0446	Sun1	Sad1 and UNC84 domain containing 1 (Sun1), transcript variant X15, mRNA
XM_028889963.2	2418	6.3	1.09	1	13.91	-4.13	0.0447	Dram2	DNA damage regulated autophagy modulator 2 (Dram2), transcript variant X1, mRNA
XM_028886645.2	5373	0.27	-140.97	0.0161	0.2	184.01	0.0448	Rps6ka5	ribosomal protein S6 kinase A5 (Rps6ka5), transcript variant X2, mRNA
XM_028858076.2	2341	2.31	2.33	0.998	2.38	-9.57	0.0448	Wdr25	WD repeat domain 25 (Wdr25), transcript variant X5, mRNA
XM_028857058.2	1125	0.37	-2.74	1	0.66	-44.08	0.0448	Aimp1	aminoacyl tRNA synthetase complex interacting multifunctional protein 1 (Aimp1), transcript variant X4, mRNA
XM_037210793.1	2637	10.63	-5.01	0.00346	2.64	-5.36	0.0449	LOC119089013	uncharacterized LOC119089013 (LOC119089013), transcript variant X1, mRNA
XM_037197570.1	2029	0.28	151.16	0.0666	0.41	192.7	0.0449	Puf60	poly(U) binding splicing factor 60 (Puf60), transcript variant X5, mRNA
XM_028863904.2	2322	1.69	-6.2	0.437	0.67	279.8	0.0449	Mtmr14	myotubularin related protein 14 (Mtmr14), transcript variant X4, mRNA
XM_037206235.1	1527	1.65	-2.53	1	0.68	167.64	0.045	Dus2	dihydrouridine synthase 2 (Dus2), transcript variant X3, mRNA
XM_028874981.2	7658	1.21	1.1	1	0.86	10.43	0.0452	Pfkfb2	6-phosphofructo-2-kinase/fructose-2,6-biphosphatase 2 (Pfkfb2), transcript variant X7, mRNA
XM_028873597.2	3675	0.27	9.61	0.26	0.3	179.65	0.0453	Ddhd1	DDHD domain containing 1 (Ddhd1), transcript variant X1, mRNA
XM_028864354.2	3348	0.06	-58.66	0.158	0.21	147	0.0453	Pbx1	PBX homeobox 1 (Pbx1), transcript variant X4, mRNA
XM_028858119.2	973	15.51	1.56	1	57.23	3.48	0.0453	Gzmb	granzyme B-like (LOC114683786), mRNA
XM_028856926.1	5941	0.44	1.45	1	1.17	6.95	0.0454	Ncan	neurocan (Ncan), mRNA
XM_028881831.1	784	941.19	-1.43	0.411	1868	-3.39	0.0455	LOC114701688	cystatin-C-like (LOC114701688), mRNA
XM_028863084.2	4365	0.4	-2.58	1	0.16	-184.21	0.0455	Agtpbp1	ATP/GTP binding protein 1 (Agtpbp1), transcript variant X5, mRNA
XM_028856064.2	2839	0.91	-1.3	1	0.64	284.18	0.0456	Znf219	zinc finger protein 219 (Znf219), transcript variant X4, mRNA
XM_028894179.2	4107	0.76	1.36	1	2.23	-8.49	0.0456	Ctnnd1	catenin delta 1 (Ctnnd1), transcript variant X9, mRNA
XR_005090216.1	582	0.06	-10.08	NaN	10	8.77	0.0456	LOC119086850	uncharacterized LOC119086850 (LOC119086850), transcript variant X2, ncRNA
XM_028872765.2	2357	0.61	440.59	0.0403	0.08	-144.69	0.0457	Rngtt	RNA guanylyltransferase and 5'-phosphatase (Rngtt), transcript variant X3, mRNA
XM_028879347.2	3646	0.17	-129.81	0.097	0.09	-147.69	0.0457	Clcc1	chloride channel CLIC like 1 (Clcc1), transcript variant X3, mRNA
XM_028879096.2	6359	0	1.05	NaN	0.03	-127.18	0.0457	Ppip5k2	diphosphoinositol pentakisphosphate kinase 2 (Ppip5k2), transcript variant X2, mRNA
XM_028867818.2	5601	0.3	83.4	0.00421	0.13	-200.78	0.0457	Dcun1d3	defective in cullin neddylation 1 domain containing 3 (Dcun1d3), transcript variant X2, mRNA
XM_037206596.1	2211	0.16	-1.32	1	0.29	152.42	0.0458	Supt20h	SPT20 homolog, SAGA complex component (Supt20h), transcript variant X14, mRNA
XM_037202161.1	2753	36.22	-1.24	0.986	70.71	3.1	0.0458	Lilra3	leukocyte immunoglobulin-like receptor subfamily A member 3 (LOC114687921), transcript variant X4, mRNA
XM_028874727.1	3822	4.47	-1.04	1	54.42	-4.5	0.0459	Ptgs2	prostaglandin-endoperoxide synthase 2 (Ptgs2), mRNA
XM_028862444.2	3997	0.02	-4.64	0.937	0.16	-52.3	0.0461	Cfap69	cilia and flagella associated protein 69 (Cfap69), transcript variant X1, mRNA
XM_028885885.2	2407	6.56	1.13	1	1.8	7.77	0.0461	P2rx7	purinergic receptor P2X 7 (P2rx7), transcript variant X1, mRNA
XM_028875217.2	2396	0.94	-1.15	1	0.26	-213.71	0.0461	Tbccd1	TBCC domain containing 1 (Tbccd1), transcript variant X3, mRNA
XM_028869821.2	2398	0.09	9.27	0.458	0.11	-124.03	0.0461	Pon3	paraoxonase 3 (Pon3), transcript variant X1, mRNA
XM_028874932.2	6622	2.83	1.74	0.212	3.94	3.95	0.0462	Ccnt2	cyclin T2 (Ccnt2), transcript variant X3, mRNA
XM_028865196.2	5048	0.21	-1.02	1	0.16	187.91	0.0462	Tex2	testis expressed 2 (Tex2), transcript variant X3, mRNA
XM_037203642.1	2482	0.32	-1.11	1	0.32	164.68	0.0462	LOC114706825	putative RNA-binding protein Luc7-like 2 (LOC114706825), transcript variant X20, mRNA
XM_028894437.2	2560	0	NaN	NaN	1.12	-18.51	0.0462	Vgf	VGF nerve growth factor inducible (Vgf), transcript variant X1, mRNA
XM_037197709.1	7189	0.32	1.43	1	0.23	258.12	0.0462	Tcf20	transcription factor 20 (Tcf20), transcript variant X3, mRNA
XM_037210992.1	397	0.8	-1.04	1	221.69	-5.89	0.0467	Mt1	metallothionein-1-like (LOC114698905), mRNA
XM_028861392.2	1408	23.44	1.02	1	32.01	2.77	0.0467	Lilra5	leukocyte immunoglobulin-like receptor subfamily A member 5 (LOC114686725), transcript variant X1, mRNA
XM_037196909.1	1420	164.87	-1.19	1	107.91	-2.63	0.0467	LOC119086214	translation initiation factor IF-2-like (LOC119086214), mRNA
XM_037199790.1	1927	0.25	1.07	1	1.11	306.86	0.0467	Klhdc3	kelch domain containing 3 (Klhdc3), transcript variant X2, mRNA
XM_037200501.1	1206	1.36	1.75	1	8.24	-6.56	0.0469	LOC114686319	retinoic acid early-inducible protein 1-alpha-like (LOC114686319), transcript variant X2, mRNA
XM_037210878.1	3763	0.13	1.01	1	0.2	189.32	0.047	Ppp1r13b	protein phosphatase 1 regulatory subunit 13B (Ppp1r13b), transcript variant X2, mRNA
XM_037206306.1	5916	0.2	1.38	1	0.25	280.85	0.047	Kiaa0513	KIAA0513 ortholog (Kiaa0513), transcript variant X1, mRNA
XM_037202499.1	3954	0.26	1.1	1	0.26	241.59	0.047	Zfp271	zinc finger protein 271-like (LOC114688536), transcript variant X2, mRNA
XM_028856246.2	587	1.21	-1.27	1	0.7	-37.34	0.0471	Bola1	bolA family member 1 (Bola1), transcript variant X2, mRNA
XM_037197934.1	2866	0.96	-2.43	0.982	0.24	149.42	0.0472	Adgre4	adhesion G protein-coupled receptor E4 (LOC114684971), transcript variant X5, mRNA
XM_028872682.2	2000	0.39	-1.55	1	0.36	-32.95	0.0472	Fxr1	FMR1 autosomal homolog 1 (Fxr1), transcript variant X3, mRNA
XM_028885171.2	2633	23.41	1.07	1	47.81	2.71	0.0472	Cpne3	copine 3 (Cpne3), transcript variant X1, mRNA
XM_028893726.2	7377	0.22	1.65	1	0.19	197.62	0.0472	Kidins220	kinase D interacting substrate 220 (Kidins220), transcript variant X1, mRNA
XM_037208868.1	6727	0	NaN	NaN	0.06	-149.58	0.0474	Trmt44	tRNA methyltransferase 44 homolog (Trmt44), transcript variant X3, mRNA
XM_028888356.2	5567	1.3	79.06	0.000122	0.22	-31.24	0.0476	Brpf3	bromodomain and PHD finger containing 3 (Brpf3), transcript variant X2, mRNA
XR_005092061.1	2858	0.18	44.23	0.0534	0.24	42.62	0.0478	Ccr3	C-C motif chemokine receptor 3 (Ccr3), transcript variant X2, misc_RNA
XM_028869441.2	6628	1.81	-1.22	1	6.52	2.86	0.0478	Kdm6b	lysine demethylase 6B (Kdm6b), transcript variant X8, mRNA
XM_028876595.2	4485	4.85	1.3	1	7.39	3.42	0.048	Zc3h11a	zinc finger CCCH-type containing 11A (Zc3h11a), transcript variant X4, mRNA
XM_028865157.2	11558	0.27	1.22	1	0.42	214.27	0.048	Tanc2	tetratricopeptide repeat, ankyrin repeat and coiled-coil containing 2 (Tanc2), transcript variant X7, mRNA
XM_028864823.1	3018	0.7	615.98	0.0168	0.37	176.66	0.048	Slain1	SLAIN motif family member 1 (Slain1), transcript variant X3, mRNA
XM_028864867.2	3653	0.41	1.09	1	0.26	180.33	0.0481	Usp28	ubiquitin specific peptidase 28 (Usp28), transcript variant X10, mRNA
XM_037209232.1	7044	0.09	14.77	0.0967	0.08	-181.6	0.0483	Ptpn13	protein tyrosine phosphatase non-receptor type 13 (Ptpn13), transcript variant X6, mRNA
XM_037206962.1	2506	0.29	-1.01	1	0.37	180.56	0.0486	Zfyve27	zinc finger FYVE-type containing 27 (Zfyve27), transcript variant X2, mRNA
XM_037204393.1	690	0.07	1.48	NaN	0.45	-21.95	0.049	Rpl15	60S ribosomal protein L15-like (LOC114710758), mRNA
XM_028893346.2	2800	0.22	1.07	1	0.16	-140.56	0.049	Fam234a	family with sequence similarity 234 member A (Fam234a), transcript variant X4, mRNA
XM_037209021.1	8032	0.11	1.83	1	0.06	-155.84	0.049	Lcorl	ligand dependent nuclear receptor corepressor like (Lcorl), transcript variant X4, mRNA
XM_037203711.1	2796	0.58	-1.1	1	0.18	-138.43	0.0491	LOC114700136	GTPase IMAP family member 3-like (LOC114700136), transcript variant X6, mRNA
XM_028889744.2	2238	0.17	-42.93	0.109	0.06	-142.45	0.0491	Mutyh	mutY DNA glycosylase (Mutyh), transcript variant X2, mRNA
XM_028885151.2	1712	28.06	1.73	0.348	41.75	-3	0.0491	Ca2	carbonic anhydrase 2 (LOC114704100), mRNA
XM_028854896.2	2806	0.4	1.09	1	0.18	-139.63	0.0491	LOC114681405	fukutin related protein (LOC114681405), transcript variant X2, mRNA
XM_028886273.2	1804	0.11	-2.15	1	0.07	-142.45	0.0491	Dtx3	deltex E3 ubiquitin ligase 3 (Dtx3), transcript variant X2, mRNA
XM_037203292.1	3964	0.75	-1.58	1	0.37	85.63	0.0491	Acap3	ArfGAP with coiled-coil, ankyrin repeat and PH domains 3 (Acap3), transcript variant X1, mRNA
XR_005093047.1	2297	0	NaN	NaN	0.14	-138.91	0.0491	LOC119089178	uncharacterized LOC119089178 (LOC119089178), transcript variant X1, ncRNA
XM_037199127.1	571	0.21	6.33	0.69	0.49	-123.72	0.0492	Uxt	ubiquitously expressed prefoldin like chaperone (Uxt), transcript variant X1, mRNA
XM_028887330.2	2264	0.35	2.5	1	0.2	-43.73	0.0492	Zcchc12	zinc finger CCHC-type containing 12 (Zcchc12), transcript variant X2, mRNA
XM_037206372.1	2616	0	NaN	NaN	0.09	-116.79	0.0496	Sufu	SUFU negative regulator of hedgehog signaling (Sufu), transcript variant X2, mRNA
XM_028888466.2	6688	0.13	2.75	1	0.04	-139.54	0.0497	Plxnb3	plexin B3 (Plxnb3), transcript variant X2, mRNA
XM_028875585.2	3951	8.33	-1.31	0.882	20.55	2.59	0.0497	Card6	caspase recruitment domain family member 6 (Card6), mRNA
XM_028859564.1	3127	0.69	-1.66	1	0.3	168.92	0.0497	Catsperg	cation channel sperm associated auxiliary subunit gamma (Catsperg), transcript variant X7, mRNA
XM_028874556.2	4006	0.71	-1.01	1	0.3	178.22	0.0497	Pou6f1	POU class 6 homeobox 1 (Pou6f1), transcript variant X1, mRNA
XM_037199013.1	3137	0.1	1.01	1	0.32	-48.12	0.0497	Gpr174	G protein-coupled receptor 174 (Gpr174), transcript variant X1, mRNA
XM_037211313.1	2989	0.12	-1.67	1	0.1	-115.88	0.0497	C15H1orf112	chromosome 15 C1orf112 homolog (C15H1orf112), transcript variant X3, mRNA
XM_037203577.1	1771	0.43	-1.36	1	1.04	46.13	0.0498	LOC119087584	actin cytoskeleton-regulatory complex protein PAN1-like (LOC119087584), transcript variant X1, mRNA
XM_028881383.2	3974	0.22	1.79	1	0.2	175.6	0.0498	Hdac6	histone deacetylase 6 (Hdac6), transcript variant X5, mRNA
XM_028885379.2	4157	0.16	2.84	1	0.37	261.17	0.0498	Nnt	nicotinamide nucleotide transhydrogenase (Nnt), transcript variant X4, mRNA
XM_037200511.1	3885	1.76	1.01	1	9.21	-5.01	0.0498	Dse	dermatan sulfate epimerase (Dse), transcript variant X2, mRNA
XM_028890504.2	828	0.91	1.05	1	1.32	58.42	0.0499	Kiaa1143	KIAA1143 ortholog (Kiaa1143), transcript variant X3, mRNA
XM_037204695.1	2866	0.21	-4.19	0.807	0.12	-53.57	0.05	Traf2	TNF receptor associated factor 2 (Traf2), transcript variant X3, mRNA
XM_028859324.2	1367	1.34	-3.29	0.812	0.15	-133.73	0.05	Gfus	GDP-L-fucose synthase (Gfus), transcript variant X2, mRNA
XM_037205965.1	7045	0.6	1.28	1	0.61	14.87	0.05	Tasor2	transcription activation suppressor family member 2 (Tasor2), transcript variant X6, mRNA
XM_037210906.1	4580	3.09	1.2	1	4.63	3.43	0.05	Gpr132	G protein-coupled receptor 132 (Gpr132), transcript variant X1, mRNA
XM_028856593.2	2820	99.45	1.26	1	102.57	-3.15	0.0501	Fech	ferrochelatase (Fech), mRNA
XM_028870539.2	3520	4.89	1.57	0.575	9.82	3.07	0.0502	Marchf7	membrane associated ring-CH-type finger 7 (Marchf7), transcript variant X5, mRNA
XM_028856885.2	4525	12.13	-1.1	1	9.57	2.82	0.0503	Nbr1	NBR1 autophagy cargo receptor (Nbr1), transcript variant X1, mRNA
XM_028890558.2	2771	2.19	-1.09	1	0.53	29.59	0.0503	Ggnbp2	gametogenetin binding protein 2 (Ggnbp2), transcript variant X8, mRNA
XM_037206288.1	1916	0.69	5.38	0.632	0.57	192.67	0.0504	Kars1	lysyl-tRNA synthetase 1 (Kars1), transcript variant X4, mRNA
XM_028876700.2	1233	50.61	-1.22	0.92	65.46	-3.42	0.0504	Npc2	NPC intracellular cholesterol transporter 2 (Npc2), mRNA
XM_028865062.2	1275	0.61	-1.61	1	1.48	12.94	0.0504	LOC114690325	RNA polymerase-associated protein LEO1-like (LOC114690325), mRNA
XM_028891416.2	2169	0.06	3.2	1	0.14	-115.64	0.0504	Dvl1	dishevelled segment polarity protein 1 (Dvl1), transcript variant X4, mRNA
XM_028893569.2	7231	4.05	-1.4	1	1.69	8.64	0.0504	Zmiz1	zinc finger MIZ-type containing 1 (Zmiz1), transcript variant X1, mRNA
XM_037199473.1	6368	0.06	-2.55	1	0.17	167.03	0.0506	Garre1	granule associated Rac and RHOG effector 1 (Garre1), transcript variant X5, mRNA
XM_028885284.2	1857	0.47	3.66	0.705	0.4	-19.29	0.0507	Eef1a2	eukaryotic translation elongation factor 1 alpha 2 (Eef1a2), transcript variant X2, mRNA
XM_028884279.2	5691	0.92	-1	1	5.08	4.66	0.0507	Dagla	diacylglycerol lipase alpha (Dagla), mRNA
XM_028853683.2	4848	0.18	-185.84	0.0321	0.38	305.84	0.0507	Rtn3	reticulon 3 (Rtn3), transcript variant X1, mRNA
XM_028865567.2	3502	0.44	9.48	0.124	0.06	-27.19	0.0507	Atp1a2	ATPase Na+/K+ transporting subunit alpha 2 (Atp1a2), mRNA
XM_028887100.2	1609	0.89	-1.07	1	3.63	12.48	0.0507	Ccdc160	coiled-coil domain containing 160 (Ccdc160), transcript variant X1, mRNA
XM_037203654.1	12904	0.05	1.14	1	0.02	-112.15	0.0507	Dgki	diacylglycerol kinase iota (Dgki), transcript variant X10, mRNA
XM_037205167.1	2484	0.81	1.55	1	0.21	-169.01	0.0508	Adal	adenosine deaminase like (Adal), transcript variant X3, mRNA
XM_028854857.2	5670	0.28	1.89	1	0.16	169.79	0.0511	LOC114681372	F-box-like/WD repeat-containing protein TBL1X (LOC114681372), transcript variant X9, mRNA
XM_028876415.1	4025	0	NaN	NaN	0.04	-137.91	0.0511	Prpf40a	pre-mRNA processing factor 40 homolog A (Prpf40a), transcript variant X8, mRNA
XM_028857280.2	5022	22.8	-1.02	1	19.07	2.78	0.0511	Slc12a6	solute carrier family 12 member 6-like (LOC114683104), mRNA
XM_028865374.2	17344	0.01	1.82	NaN	0.01	-117.85	0.0512	Dst	dystonin (Dst), transcript variant X24, mRNA
XM_028873304.2	2230	0.18	-2.17	1	0.16	-64.9	0.0515	Gpatch11	G-patch domain containing 11 (Gpatch11), transcript variant X3, mRNA
XM_037209299.1	4870	0	NaN	NaN	0.05	-131.04	0.0515	Idua	alpha-L-iduronidase (Idua), transcript variant X5, mRNA
XM_028859306.2	4956	0.19	-240.45	0.028	0.1	-131.7	0.0515	LOC114684740	zinc finger protein 41 (LOC114684740), transcript variant X3, mRNA
XM_028860023.2	2552	0.95	-1.78	1	0.52	216.56	0.0516	Mlh1	mutL homolog 1 (Mlh1), transcript variant X3, mRNA
XM_028871719.2	8535	0.35	1028.16	0.00354	0.24	189.2	0.0517	Bdp1	B double prime 1, subunit of RNA polymerase III transcription initiation factor IIIB (Bdp1), transcript variant X3, mRNA
XM_037211009.1	2078	1.84	1	1	1.93	-5.28	0.0517	Eef2k	eukaryotic elongation factor 2 kinase (Eef2k), transcript variant X4, mRNA
XM_028882882.2	5962	0.07	-103.41	0.087	0.04	-131.53	0.0517	Cpeb3	cytoplasmic polyadenylation element binding protein 3 (Cpeb3), transcript variant X2, mRNA
XM_028866324.2	3955	0.93	-1.22	1	0.25	163.75	0.0518	Usp2	ubiquitin specific peptidase 2 (Usp2), transcript variant X1, mRNA
XM_028873422.2	5065	0.91	2.66	0.954	0.21	207.13	0.0519	Rasgrp3	RAS guanyl releasing protein 3 (Rasgrp3), transcript variant X3, mRNA
XM_028870115.2	4466	0.15	224.56	0.0414	0.16	180.04	0.0521	Gtf2i	general transcription factor IIi (Gtf2i), transcript variant X2, mRNA
XM_028890755.2	885	12.24	-2.14	0.553	26.01	3.46	0.0521	LOC114707876	protein S100-A15A (LOC114707876), mRNA
XM_028865966.2	3578	1.04	2.9	0.768	1.46	9.6	0.0521	Tbc1d2b	TBC1 domain family member 2B (Tbc1d2b), transcript variant X2, mRNA
XM_028854686.2	5319	0.81	2.63	0.737	0.16	196.81	0.0524	Ift140	intraflagellar transport 140 (Ift140), transcript variant X2, mRNA
XM_028884648.2	2897	0.05	-1.22	1	0.12	-111.49	0.0526	Fnbp1	formin binding protein 1 (Fnbp1), transcript variant X9, mRNA
XM_037209476.1	6145	1.93	-1.31	1	3.82	3.64	0.0526	LOC114694683	baculoviral IAP repeat-containing protein 1e-like (LOC114694683), mRNA
XM_037199081.1	4080	0.09	-97.29	0.0799	0.23	170.56	0.0527	Znf182	zinc finger protein 182 (Znf182), transcript variant X8, mRNA
XM_028860425.2	5587	28.44	-1.43	0.332	50.7	2.98	0.0527	Trpm2	transient receptor potential cation channel subfamily M member 2 (Trpm2), transcript variant X1, mRNA
XM_037197973.1	4262	0.07	1.05	1	0.38	260.61	0.0527	Furin	furin, paired basic amino acid cleaving enzyme (Furin), transcript variant X1, mRNA
XM_028872103.1	1421	0.13	10.74	0.404	0.08	-136.15	0.0528	Gap43	growth associated protein 43 (Gap43), mRNA
XM_028854707.2	3370	3.63	-1.16	1	8.08	3.22	0.0528	Iqsec1	IQ motif and Sec7 domain ArfGEF 1 (Iqsec1), transcript variant X11, mRNA
XM_028854994.2	8030	0.18	-1.42	1	0.11	195.8	0.0528	Nr2c2	nuclear receptor subfamily 2 group C member 2 (Nr2c2), transcript variant X5, mRNA
XM_037207378.1	2084	1.31	-6.59	0.207	0.34	22.46	0.0528	LOC114691030	protection of telomeres protein 1-like (LOC114691030), transcript variant X1, mRNA
XM_028887777.2	2339	7.33	-1.25	1	17.62	3.66	0.0529	Bmx	BMX non-receptor tyrosine kinase (Bmx), transcript variant X1, mRNA
XM_037196891.1	2892	0.08	2.79	1	0.36	166.57	0.0529	Appl2	adaptor protein, phosphotyrosine interacting with PH domain and leucine zipper 2 (Appl2), transcript variant X4, mRNA
XM_028869871.2	1585	0.05	2.45	1	0.69	-15.47	0.053	Tfpi2	tissue factor pathway inhibitor 2 (Tfpi2), mRNA
XM_028870728.1	5318	0.18	1.07	1	0.16	151.26	0.053	Depdc5	DEP domain containing 5, GATOR1 subcomplex subunit (Depdc5), transcript variant X5, mRNA
XM_028889069.2	2421	0.54	-15.94	0.0877	0.37	39.11	0.0533	Pgap2	post-GPI attachment to proteins 2 (Pgap2), transcript variant X3, mRNA
XM_028878464.2	2912	0	NaN	NaN	0.19	-32.63	0.0533	Atxn7l1	ataxin 7 like 1 (Atxn7l1), transcript variant X10, mRNA
XM_028880779.2	2925	0.3	2.17	1	0.22	-13.36	0.0536	LOC114700935	tubulin beta-3 chain (LOC114700935), mRNA
XR_005089680.1	2029	0.36	-1.93	1	2.95	6.69	0.0536	LOC119086395	uncharacterized LOC119086395 (LOC119086395), ncRNA
XM_037203884.1	9882	0	NaN	NaN	0.03	-130.22	0.0536	Aak1	AP2 associated kinase 1 (Aak1), transcript variant X12, mRNA
XM_028877795.2	2180	0.9	-3.23	0.822	0.83	268.08	0.0536	Gpi	glucose-6-phosphate isomerase (Gpi), transcript variant X2, mRNA
XM_037207664.1	1547	6.4	1.52	1	6.2	8.61	0.0537	LOC114695272	cyclin-G1-like (LOC114695272), mRNA
XM_037206030.1	2235	1.66	-1.59	1	0.89	268.17	0.0538	Prkaca	protein kinase cAMP-activated catalytic subunit alpha (Prkaca), transcript variant X2, mRNA
XM_028870468.2	5096	1.64	3.23	0.425	0.39	326.83	0.0539	Mllt10	MLLT10 histone lysine methyltransferase DOT1L cofactor (Mllt10), transcript variant X1, mRNA
XM_037201010.1	2304	0.05	-32.32	NaN	0.06	-131.94	0.0539	Rab34	RAB34, member RAS oncogene family (Rab34), transcript variant X8, mRNA
XM_028863814.2	4520	0.32	-408.46	0.024	0.09	-129.9	0.0539	Spin1	spindlin 1 (Spin1), transcript variant X3, mRNA
XM_028883675.1	2720	0.31	53.72	0.038	0.25	180	0.0539	Mta1	metastasis associated 1 (Mta1), transcript variant X4, mRNA
XM_028860486.2	3289	0.33	1.59	1	0.32	76.07	0.0539	Armcx3	armadillo repeat containing X-linked 3 (Armcx3), transcript variant X2, mRNA
XM_037209790.1	3227	0.47	1.11	1	0.29	188.45	0.0541	Fyttd1	forty-two-three domain containing 1 (Fyttd1), transcript variant X2, mRNA
XM_037210648.1	3130	0.49	-2.23	1	0.53	34.08	0.0541	Fut8	fucosyltransferase 8 (Fut8), transcript variant X4, mRNA
XM_028875302.2	858	6.85	-1.27	1	36.7	-3.31	0.0543	Pla2g2a	phospholipase A2 group IIA (Pla2g2a), mRNA
XM_028870318.2	2112	0.45	-1.35	1	0.15	-104.33	0.0543	Ift74	intraflagellar transport 74 (Ift74), transcript variant X2, mRNA
XM_028886942.2	1833	1.05	-1.43	1	0.84	240.37	0.0543	Arih2	ariadne RBR E3 ubiquitin protein ligase 2 (Arih2), transcript variant X1, mRNA
XR_005091407.1	1394	0.84	-1.21	1	0.82	40.29	0.0543	LOC119087895	uncharacterized LOC119087895 (LOC119087895), ncRNA
XM_037197447.1	3407	0.17	135.74	0.0749	0.06	-123.82	0.0545	Dennd6b	DENN domain containing 6B (Dennd6b), transcript variant X1, mRNA
XM_028867296.2	7615	0.07	-2.62	1	0.08	-42.34	0.0545	Ptpn13	protein tyrosine phosphatase non-receptor type 13 (Ptpn13), transcript variant X2, mRNA
XR_005092126.1	5506	0.15	5.63	0.621	0.15	40.49	0.0546	Rbm26	RNA binding motif protein 26 (Rbm26), transcript variant X8, misc_RNA
XM_037207736.1	4303	8.27	1.22	0.942	12.82	2.39	0.0546	Zfp317	zinc finger protein 317-like (LOC114687679), mRNA
XM_037203739.1	3101	0.21	-2.44	1	0.06	-130.28	0.0547	Lmbr1	limb development membrane protein 1 (Lmbr1), transcript variant X4, mRNA
XM_037205527.1	1226	0.51	191	0.0431	0.37	-46.24	0.0548	Pkig	cAMP-dependent protein kinase inhibitor gamma (Pkig), transcript variant X7, mRNA
XM_028895293.2	1606	0.44	-2.11	1	0.23	-111.75	0.0548	Acy1	aminoacylase 1 (Acy1), transcript variant X2, mRNA
XM_037205333.1	2682	0.94	-1.05	1	0.45	177.32	0.055	Cbfa2t2	CBFA2/RUNX1 partner transcriptional co-repressor 2 (Cbfa2t2), transcript variant X3, mRNA
XM_037207233.1	3418	0.58	-1.03	1	0.23	192.99	0.055	Miga1	mitoguardin 1 (Miga1), transcript variant X2, mRNA
XM_028870548.2	4897	0.35	2.55	0.922	0.14	142.44	0.0551	Nacad	NAC alpha domain containing (Nacad), transcript variant X1, mRNA
XM_028856080.2	2106	1.91	1.36	1	0.5	56.52	0.0551	Ndrg2	NDRG family member 2 (Ndrg2), transcript variant X5, mRNA
XM_028863535.2	1661	3.11	-1.94	1	0.96	293.53	0.0551	Pdlim7	PDZ and LIM domain 7 (Pdlim7), transcript variant X5, mRNA
XM_028885694.2	267	0.02	-2.46	NaN	9.95	-10.65	0.0551	Mt2	metallothionein-2-like (LOC114704434), mRNA
XM_037204254.1	1735	0.22	-127.18	0.0674	0.25	-131.58	0.0552	Pparg	peroxisome proliferator activated receptor gamma (Pparg), transcript variant X5, mRNA
XM_037206311.1	4989	0.38	2.7	0.975	0.27	49.99	0.0552	Gse1	Gse1 coiled-coil protein (Gse1), transcript variant X9, mRNA
XM_028881591.2	2030	0.24	-2.52	0.952	2.3	-6.95	0.0553	Pla1a	phospholipase A1 member A (Pla1a), mRNA
XM_037203538.1	3850	0.16	-136.45	0.0924	0.24	185.14	0.0555	LOC114687570	phosphatidylcholine translocator ABCB4 (LOC114687570), transcript variant X2, mRNA
XM_028877080.2	14028	0.07	249.49	0.034	0.08	39.33	0.0555	Slc5a3	solute carrier family 5 member 3 (Slc5a3), transcript variant X3, mRNA
XM_028854315.2	1339	0.96	-3.99	0.609	0.26	-32.84	0.0555	Enkd1	enkurin domain containing 1 (Enkd1), transcript variant X6, mRNA
XM_028875619.2	2960	0.32	1.15	1	0.28	59.26	0.0555	Lmbrd2	LMBR1 domain containing 2 (Lmbrd2), transcript variant X3, mRNA
XM_037205331.1	2128	1.23	-1.14	1	0.61	200.82	0.0555	Cdk5rap1	CDK5 regulatory subunit associated protein 1 (Cdk5rap1), transcript variant X2, mRNA
XM_037207851.1	7169	0.02	3.24	1	0.07	-126.19	0.0555	Tfdp2	transcription factor Dp-2 (Tfdp2), transcript variant X5, mRNA
XM_028872615.2	2011	0.02	-4.47	NaN	0.14	-126.47	0.0555	Gpr160	G protein-coupled receptor 160 (Gpr160), transcript variant X8, mRNA
XM_037205212.1	10806	0.06	1.47	1	0.32	-11.83	0.0557	Prune2	prune homolog 2 with BCH domain (Prune2), transcript variant X10, mRNA
XM_028877663.1	1236	0.03	-8.59	NaN	0.54	164.98	0.0557	Mlnr	motilin receptor (Mlnr), mRNA
XM_028865289.2	2589	0.36	1.51	1	0.28	-72.07	0.0557	C8BH17orf80	chromosome 8b C17orf80 homolog (C8BH17orf80), transcript variant X3, mRNA
XM_028860634.2	2227	0.21	-3.16	0.961	0.16	-19.82	0.056	Syt12	synaptotagmin 12 (Syt12), transcript variant X1, mRNA
XM_028884554.2	3351	0.44	-1.68	1	0.38	255.7	0.0562	Arl15	ADP ribosylation factor like GTPase 15 (Arl15), transcript variant X2, mRNA
XM_028887121.2	2213	1.07	-1.44	1	4.03	4.33	0.0562	Vegfa	vascular endothelial growth factor A (Vegfa), transcript variant X8, mRNA
XM_028866464.1	4147	0.08	-2.23	1	0.15	-43.86	0.0562	Sidt2	SID1 transmembrane family member 2 (Sidt2), transcript variant X3, mRNA
XM_028869186.2	3587	0.66	1.85	1	0.36	216.18	0.0562	Ppp6r2	protein phosphatase 6 regulatory subunit 2 (Ppp6r2), transcript variant X17, mRNA
XM_028856128.2	657	1.72	2.14	1	10.63	-8.77	0.0563	LOC114682272	eosinophil cationic protein-like (LOC114682272), mRNA
XM_028857750.2	5609	0.23	-1.78	1	0.2	-189.99	0.0564	Fktn	fukutin (Fktn), transcript variant X2, mRNA
XM_028853979.2	8412	23.49	-1.03	1	21.18	2.53	0.0564	Srrm2	serine/arginine repetitive matrix 2 (Srrm2), transcript variant X6, mRNA
XM_028861185.2	1424	0.11	1.47	1	0.08	-110.96	0.0565	Adat3	adenosine deaminase tRNA specific 3 (Adat3), transcript variant X2, mRNA
XM_028867621.2	3857	0.38	2.41	1	0.28	30.24	0.0566	Gen1	GEN1 Holliday junction 5' flap endonuclease (Gen1), transcript variant X3, mRNA
XM_028867721.2	2171	9.32	1.04	1	26.98	-2.87	0.0566	Cd83	CD83 molecule (Cd83), mRNA
XM_037209094.1	11283	0.23	3.13	0.983	0.1	-152.18	0.0567	Fryl	FRY like transcription coactivator (Fryl), transcript variant X7, mRNA
XM_037211627.1	2232	0	NaN	NaN	0.1	-121.68	0.0567	Ckap2	cytoskeleton associated protein 2 (Ckap2), transcript variant X4, mRNA
XM_037211626.1	2263	0.34	1.19	1	0.19	-122.97	0.057	Ckap2	cytoskeleton associated protein 2 (Ckap2), transcript variant X3, mRNA
XM_028879352.2	2087	1.2	-1.03	1	0.57	203.16	0.057	Clcc1	chloride channel CLIC like 1 (Clcc1), transcript variant X5, mRNA
XR_005091832.1	4991	0.35	-1.27	1	0.43	272.7	0.057	Vav3	vav guanine nucleotide exchange factor 3 (Vav3), transcript variant X3, misc_RNA
XM_037199247.1	4980	0.2	-1.02	1	0.15	157.88	0.0571	Zmym3	zinc finger MYM-type containing 3 (Zmym3), transcript variant X7, mRNA
XM_028872658.2	2675	0.28	-207.58	0.0514	0.35	-193.82	0.0572	Gnb4	G protein subunit beta 4 (Gnb4), transcript variant X2, mRNA
XM_028863438.2	1611	3.35	1.57	1	1.63	11.13	0.0576	Txndc15	thioredoxin domain containing 15 (Txndc15), transcript variant X3, mRNA
XM_028893727.2	7374	0.2	1.78	1	0.17	171.45	0.0576	Kidins220	kinase D interacting substrate 220 (Kidins220), transcript variant X2, mRNA
XM_037201534.1	1764	1.45	-1.34	1	0.51	152.65	0.0576	Skap1	src kinase associated phosphoprotein 1 (Skap1), transcript variant X3, mRNA
XR_005091169.1	935	33.52	1.11	1	124.07	3.02	0.0576	LOC119087660	uncharacterized LOC119087660 (LOC119087660), ncRNA
XM_028870627.2	4091	0.22	17.04	0.171	0.22	153.27	0.0576	Ap1b1	adaptor related protein complex 1 subunit beta 1 (Ap1b1), transcript variant X1, mRNA
XM_028864665.2	8713	0.54	-42.95	0.00217	0.19	58.72	0.0577	Ldlrad4	low density lipoprotein receptor class A domain containing 4 (Ldlrad4), transcript variant X4, mRNA
XR_005090229.1	996	34.91	-2.2	0.0255	10.46	-4.5	0.0577	LOC119086860	uncharacterized LOC119086860 (LOC119086860), transcript variant X1, ncRNA
XM_028864537.2	5064	0.11	-1.3	1	0.22	46.33	0.0577	Mybl1	MYB proto-oncogene like 1 (Mybl1), transcript variant X2, mRNA
XM_028864860.2	4317	0.21	-1.43	1	0.07	-50.83	0.0577	Usp28	ubiquitin specific peptidase 28 (Usp28), transcript variant X3, mRNA
XM_037207109.1	1812	0.22	1.04	1	0.45	179.31	0.0579	Sgms2	sphingomyelin synthase 2 (Sgms2), transcript variant X4, mRNA
XM_028880643.2	3079	0.63	532.59	0.0203	0.57	286.8	0.0579	Scrn3	secernin 3 (Scrn3), transcript variant X3, mRNA
XM_028856673.2	5917	2.39	1.23	1	4.69	3.97	0.0579	Gabbr1	gamma-aminobutyric acid type B receptor subunit 1 (Gabbr1), transcript variant X1, mRNA
XM_028888503.2	4047	0.06	62.45	0.173	0.3	31.5	0.0581	Pdzd4	PDZ domain containing 4 (Pdzd4), transcript variant X1, mRNA
XM_028890042.2	8155	0.29	-1.19	1	0.06	-131.33	0.0581	Mrtfb	myocardin related transcription factor B (Mrtfb), transcript variant X3, mRNA
XM_037207256.1	3715	0.31	-1.38	1	0.23	25.87	0.0585	Slf2	SMC5-SMC6 complex localization factor 2 (Slf2), transcript variant X2, mRNA
XR_005090488.1	1229	0.1	-13.77	NaN	0.27	-109.28	0.0585	Tvp23a	trans-golgi network vesicle protein 23 homolog A (Tvp23a), transcript variant X2, misc_RNA
XM_028856487.2	12794	0.13	203.56	0.0106	0.06	159.26	0.0585	LOC114682562	myosin phosphatase Rho interacting protein (LOC114682562), transcript variant X4, mRNA
XR_003732816.2	1378	0.86	-1.06	1	0.78	30.86	0.0585	Tia1	TIA1 cytotoxic granule associated RNA binding protein (Tia1), transcript variant X3, misc_RNA
XM_037204275.1	5458	0.02	2.34	NaN	0.22	218.14	0.0586	Brpf1	bromodomain and PHD finger containing 1 (Brpf1), transcript variant X2, mRNA
XM_037207019.1	2289	0.18	1.89	1	0.57	234.86	0.0586	Vav3	vav guanine nucleotide exchange factor 3 (Vav3), transcript variant X4, mRNA
XM_028859131.1	3557	0.2	2.01	1	0.4	-122.82	0.0586	Supt5h	SPT5 homolog, DSIF elongation factor subunit (Supt5h), transcript variant X3, mRNA
XM_028879957.2	8607	2.09	-1.03	1	1.62	4.79	0.0586	Ttc3	tetratricopeptide repeat domain 3 (Ttc3), transcript variant X4, mRNA
XM_037200480.1	3635	0.33	-1.19	1	0.12	-37.35	0.0586	L3mbtl3	L3MBTL histone methyl-lysine binding protein 3 (L3mbtl3), transcript variant X4, mRNA
XM_037205114.1	1229	1.27	2.48	1	0.87	79.15	0.0586	LOC114692306	complex I intermediate-associated protein 30, mitochondrial-like (LOC114692306), transcript variant X2, mRNA
XM_028857817.2	3924	53.7	-1.89	0.122	343.12	2.96	0.0588	Slc2a3	solute carrier family 2 member 3 (Slc2a3), transcript variant X3, mRNA
XM_028857130.2	4645	0.04	-2.85	1	0.09	-118.76	0.0589	Npnt	nephronectin (Npnt), transcript variant X1, mRNA
XM_028891145.2	693	64.1	1.04	1	57.78	-2.23	0.0591	Ndufb8	NADH:ubiquinone oxidoreductase subunit B8 (Ndufb8), mRNA
XM_028878386.2	4585	0.26	3	0.978	0.13	-145.33	0.0593	Parg	poly(ADP-ribose) glycohydrolase (Parg), transcript variant X2, mRNA
XM_037211844.1	5210	12.42	-1.13	1	8.1	2.64	0.0594	Mast3	microtubule associated serine/threonine kinase 3 (Mast3), transcript variant X7, mRNA
XM_028894562.2	1791	0.24	-96.77	0.13	0.5	152.73	0.0594	Brox	BRO1 domain and CAAX motif containing (Brox), transcript variant X4, mRNA
XM_028855131.2	4349	0.09	137.41	0.078	0.08	-98.35	0.0594	Phtf2	putative homeodomain transcription factor 2 (Phtf2), transcript variant X3, mRNA
XM_028872172.2	561	68.31	-1.4	0.505	69.14	-2.56	0.0594	LOC114695027	histone H2A.J (LOC114695027), mRNA
XM_028864755.2	2880	0.24	3.81	0.639	0.27	134.84	0.0594	Mbd1	methyl-CpG binding domain protein 1 (Mbd1), transcript variant X11, mRNA
XM_037200486.1	3801	0.13	4.11	0.99	0.17	-186.45	0.0594	Plagl1	PLAG1 like zinc finger 1 (Plagl1), transcript variant X3, mRNA
XM_028876188.2	2362	0.04	1.02	1	2.11	-13.56	0.0594	Slc16a14	solute carrier family 16 member 14 (Slc16a14), mRNA
XM_028868190.2	876	31.49	1.5	0.776	53.61	3.66	0.0594	Gzma	granzyme-like protein 2 (LOC114692456), mRNA
XM_037206087.1	1885	1.01	-1.39	1	1.54	-13.52	0.0595	LOC114694524	liver carboxylesterase 1F-like (LOC114694524), transcript variant X2, mRNA
XM_028891517.2	2002	0.18	-11.35	0.364	0.16	-27.02	0.0598	Efemp1	EGF containing fibulin extracellular matrix protein 1 (Efemp1), transcript variant X2, mRNA
XM_028893480.2	3506	0.74	-1.32	1	0.44	231.92	0.0598	Zfp120	zinc finger protein 120-like (LOC114709563), transcript variant X1, mRNA
XM_028893879.2	1862	2.34	-1.12	1	7.19	-3.65	0.0599	Pvr	poliovirus receptor homolog (LOC114709884), mRNA
XM_028882696.1	2130	0.74	-427.16	0.00844	0.34	-162.37	0.0599	Cdc27	cell division cycle 27 (Cdc27), transcript variant X12, mRNA
XR_005090365.1	372	1.8	-2.62	0.931	0.77	-36.48	0.0599	LOC119086952	uncharacterized LOC119086952 (LOC119086952), transcript variant X1, ncRNA
XM_037198401.1	9072	0.32	-1.21	1	0.15	271.96	0.06	Insr	insulin receptor (Insr), transcript variant X2, mRNA
XM_037205012.1	3848	0.21	1.1	1	0.19	154.14	0.06	Phf21a	PHD finger protein 21A (Phf21a), transcript variant X17, mRNA
XM_037205768.1	4447	0.22	1.5	1	0.09	-116.09	0.0604	Mcur1	mitochondrial calcium uniporter regulator 1 (Mcur1), transcript variant X2, mRNA
XM_028888795.2	6110	3.25	1.42	0.773	3.52	2.93	0.0608	LOC114706420	dynamin binding protein (LOC114706420), transcript variant X1, mRNA
XM_037210274.1	2740	2.56	-1.82	0.931	12.6	3.23	0.0608	Cxcr2	C-X-C chemokine receptor type 2 (LOC114709324), transcript variant X2, mRNA
XM_028860942.2	6615	0.21	1.37	1	0.42	-10.99	0.0608	Atp7b	ATPase copper transporting beta (Atp7b), mRNA
XM_028875055.2	2901	18.92	1.11	1	4.47	3.78	0.0608	Add3	adducin 3 (Add3), transcript variant X2, mRNA
XM_037199837.1	2415	1.27	-1.18	1	0.53	206.58	0.0608	Sphk2	sphingosine kinase 2 (Sphk2), transcript variant X4, mRNA
XM_028856328.2	7402	1.38	2.48	0.55	0.24	240.28	0.0611	Slc4a7	solute carrier family 4 member 7 (Slc4a7), transcript variant X4, mRNA
XM_028869376.2	6065	0.03	-7.35	0.458	0.33	-20.02	0.0611	LOC114693130	myosin-1-like (LOC114693130), mRNA
XM_028866938.2	3961	10.1	-1.2	1	9.98	2.76	0.0611	Rab11fip4	RAB11 family interacting protein 4 (Rab11fip4), transcript variant X1, mRNA
XM_028869793.2	3637	0.32	1.22	1	9.32	-11.19	0.0613	Calcr	calcitonin receptor (Calcr), transcript variant X2, mRNA
XM_028885162.2	1491	51.54	-1.72	0.112	60.42	2.54	0.0614	Sirpb1b	signal-regulatory protein beta-1-like (LOC114704110), transcript variant X1, mRNA
XM_028865112.2	3195	4.5	-1.15	1	8.1	4.69	0.0615	Sema7a	semaphorin 7A (John Milton Hagen blood group) (Sema7a), transcript variant X2, mRNA
XM_037198610.1	1003	0.72	1.07	1	0.87	30.45	0.0616	Alkbh2	alkB homolog 2, alpha-ketoglutarate dependent dioxygenase (Alkbh2), transcript variant X1, mRNA
XM_037198343.1	1860	0.33	1.12	1	0.45	28.91	0.0618	Zcwpw1	zinc finger CW-type and PWWP domain containing 1 (Zcwpw1), transcript variant X5, mRNA
XM_028888232.2	457	659.5	-1.71	0.239	980.26	2.98	0.062	Ifi27l2a	interferon alpha-inducible protein 27-like protein 2A (LOC114706032), transcript variant X2, mRNA
XM_028880798.2	5947	0.18	-1.34	1	0.13	146.68	0.0621	Gse1	Gse1 coiled-coil protein (Gse1), transcript variant X7, mRNA
XM_028890316.2	5957	0.13	-1.79	1	0.11	129.06	0.0621	Usp42	ubiquitin specific peptidase 42 (Usp42), transcript variant X2, mRNA
XM_037205168.1	2517	0.23	-3.08	1	0.11	-94.99	0.0621	Cep78	centrosomal protein 78 (Cep78), transcript variant X3, mRNA
XM_028872848.2	4944	0.36	-487.73	0.0112	0.04	-98.26	0.0621	Otud7a	OTU deubiquitinase 7A (Otud7a), transcript variant X1, mRNA
XM_037203960.1	2218	2.83	1.26	1	6.14	3.9	0.0621	Amn1	antagonist of mitotic exit network 1 homolog (Amn1), transcript variant X4, mRNA
XM_037210222.1	2640	0.54	1.54	1	0.4	201.64	0.0621	Rhbdd1	rhomboid domain containing 1 (Rhbdd1), transcript variant X3, mRNA
XM_028854275.2	1730	0.21	45.02	0.145	0.21	-110.68	0.0627	Zdhhc1	zinc finger DHHC-type containing 1 (Zdhhc1), transcript variant X1, mRNA
XM_028874999.2	9205	0	NaN	NaN	0.06	126.62	0.0629	Pcdh19	protocadherin 19 (Pcdh19), transcript variant X1, mRNA
XM_028869144.2	5225	0.37	2.24	0.99	0.18	39.25	0.0629	Tubgcp6	tubulin gamma complex associated protein 6 (Tubgcp6), transcript variant X3, mRNA
XM_028871006.2	1519	0.01	-4.41	NaN	0.22	-110.71	0.063	Slc22a18	solute carrier family 22 member 18 (Slc22a18), transcript variant X1, mRNA
XM_037210914.1	5852	0.07	-78.93	0.175	0.23	239.47	0.063	Ncapg2	non-SMC condensin II complex subunit G2 (Ncapg2), transcript variant X3, mRNA
XM_028860102.2	2337	1.7	1.14	1	4.5	7.84	0.063	B4galt3	beta-1,4-galactosyltransferase 3 (B4galt3), transcript variant X3, mRNA
XM_037201160.1	774	1.03	1.97	1	2.44	18.45	0.0632	Tm4sf5	transmembrane 4 L six family member 5 (Tm4sf5), mRNA
XM_037203907.1	3779	6.39	-1.47	0.701	4.49	-3.05	0.0633	Mgll	monoglyceride lipase (Mgll), transcript variant X2, mRNA
XM_028877967.2	6703	7.06	1.29	0.582	7.96	2.41	0.0634	Zfc3h1	zinc finger C3H1-type containing (Zfc3h1), transcript variant X2, mRNA
XM_028878766.2	3670	16.22	-1.82	0.352	41.57	3.17	0.0638	Oas3	2'-5'-oligoadenylate synthetase 3 (Oas3), transcript variant X1, mRNA
XM_028890681.2	1489	0.08	5.22	0.893	0.08	-113.09	0.0642	Supt3h	SPT3 homolog, SAGA and STAGA complex component (Supt3h), transcript variant X3, mRNA
XM_028889321.2	3652	0.83	-1.25	1	0.59	16.01	0.0642	LOC114706825	putative RNA-binding protein Luc7-like 2 (LOC114706825), transcript variant X8, mRNA
XM_037210341.1	1204	0.25	-1.5	1	0.87	38.77	0.0643	Klf7	Kruppel like factor 7 (Klf7), transcript variant X2, mRNA
XM_028893874.2	1491	2.62	3.93	0.63	1.15	-10.78	0.0643	Ckm	creatine kinase, M-type (Ckm), mRNA
XM_028864891.2	7887	0.63	-1.23	1	2.1	4.59	0.0644	Ncam1	neural cell adhesion molecule 1 (Ncam1), transcript variant X18, mRNA
XM_028875397.2	867	11.6	-1.56	0.979	45.66	-4.41	0.0644	C1qa	complement C1q A chain (C1qa), mRNA
XM_028857414.2	1976	0.42	-2.33	1	0.43	32.72	0.0644	Tmod4	tropomodulin 4 (Tmod4), transcript variant X4, mRNA
XM_037203283.1	3316	0.09	1.05	1	0.31	160.82	0.0645	Mib2	MIB E3 ubiquitin protein ligase 2 (Mib2), transcript variant X10, mRNA
XM_028888438.1	6612	1.3	1.1	1	0.9	11.64	0.0646	Anks1a	ankyrin repeat and sterile alpha motif domain containing 1A (Anks1a), transcript variant X7, mRNA
XM_037204538.1	2217	2.05	-35.96	0.00071	0.67	254.66	0.0648	Niban2	niban apoptosis regulator 2 (Niban2), transcript variant X2, mRNA
XM_037198954.1	4941	0.4	-533.55	0.00953	0.04	-92.14	0.0648	Otud7a	OTU deubiquitinase 7A (Otud7a), transcript variant X3, mRNA
XM_028889367.2	1419	0.39	178.6	0.105	0.85	214.7	0.0648	Zdhhc16	zinc finger DHHC-type palmitoyltransferase 16 (Zdhhc16), transcript variant X4, mRNA
XM_028872731.2	2673	2.95	-1.8	0.883	10.47	3.01	0.0648	Gpr27	G protein-coupled receptor 27 (Gpr27), mRNA
XM_028856232.2	2092	0.34	3.83	1	0.19	-111.02	0.0648	Vps45	vacuolar protein sorting 45 homolog (Vps45), transcript variant X1, mRNA
XM_037197175.1	8244	0.22	1.2	1	6.93	-4.28	0.0648	Alpk2	alpha kinase 2 (Alpk2), mRNA
XM_028876869.2	1470	0.05	2.2	NaN	0.18	-21.28	0.0648	Uox	uricase (LOC114698269), mRNA
XM_028867052.2	2305	16.67	1.31	0.709	13.72	-2.44	0.0648	Gypc	glycophorin C (Gerbich blood group) (Gypc), mRNA
XM_028860965.2	4774	0.06	2.83	1	0.04	-42.77	0.065	Camta2	calmodulin binding transcription activator 2 (Camta2), transcript variant X1, mRNA
XM_037197087.1	1651	1.84	-1.26	1	14.73	3.54	0.065	LOC114705143	uncharacterized LOC114705143 (LOC114705143), mRNA
XM_028860587.2	3073	3.63	1.92	0.45	3.35	10.07	0.0652	Ccr9	C-C motif chemokine receptor 9 (Ccr9), transcript variant X1, mRNA
XM_028858472.2	5688	0.26	-2.29	1	0.44	8.34	0.0652	LOC114684040	uncharacterized LOC114684040 (LOC114684040), mRNA
XM_037198221.1	5296	0.39	-5.09	0.469	0.16	162.87	0.0652	Atp10a	ATPase phospholipid transporting 10A (putative) (Atp10a), transcript variant X2, mRNA
XM_028889889.2	4538	0.26	2.42	1	0.19	138.55	0.0652	Rbmx	RNA binding motif protein X-linked (Rbmx), transcript variant X4, mRNA
XM_037204790.1	5309	5.02	-1.44	0.828	2.4	-8.41	0.0654	Fmnl2	formin like 2 (Fmnl2), transcript variant X10, mRNA
XM_037198606.1	2882	0.37	2.85	1	0.35	214.21	0.0656	Cmklr1	chemerin chemokine-like receptor 1 (Cmklr1), transcript variant X2, mRNA
XM_028868565.2	2087	3.07	-1.35	1	11.63	-6.91	0.0656	Ptgis	prostaglandin I2 synthase (Ptgis), mRNA
XM_037203688.1	4008	0.6	-162.5	0.000254	0.16	172.34	0.0656	Tnpo3	transportin 3 (Tnpo3), transcript variant X4, mRNA
XM_028858729.2	2315	0.53	-1.49	1	0.23	110.5	0.0656	LOC114684223	histo-blood group ABO system transferase 2 (LOC114684223), transcript variant X1, mRNA
XM_037200890.1	3636	0.34	-2.04	1	0.16	-33.92	0.0656	LOC114706394	uncharacterized LOC114706394 (LOC114706394), transcript variant X2, mRNA
XM_037207147.1	1674	0.07	3.18	1	0.16	-90	0.0656	Kyat3	kynurenine aminotransferase 3 (Kyat3), transcript variant X1, mRNA
XM_028861227.2	12431	0.14	504.6	0.0227	0.05	-32.17	0.0658	Utrn	utrophin (Utrn), transcript variant X1, mRNA
XM_037208731.1	1917	0.16	-1.77	1	0.17	-48.2	0.0658	Oxnad1	oxidoreductase NAD binding domain containing 1 (Oxnad1), transcript variant X4, mRNA
XM_028881380.2	4019	0.15	1.6	1	0.25	57.71	0.066	Hdac6	histone deacetylase 6 (Hdac6), transcript variant X2, mRNA
XM_028891315.2	3011	0.05	1.41	1	0.69	-11.81	0.066	Nrp2	neuropilin 2 (Nrp2), transcript variant X5, mRNA
XM_037207874.1	1991	0.42	-72.78	0.0352	0.54	33.45	0.066	Dbr1	debranching RNA lariats 1 (Dbr1), transcript variant X2, mRNA
XM_028863656.2	12846	0.38	1	1	0.06	160.39	0.066	Nsd1	nuclear receptor binding SET domain protein 1 (Nsd1), transcript variant X4, mRNA
XM_037203914.1	3398	11.68	-1.3	0.841	31.66	2.7	0.0665	Iqsec1	IQ motif and Sec7 domain ArfGEF 1 (Iqsec1), transcript variant X10, mRNA
XM_028875922.2	4012	0.11	2.83	1	0.17	163.4	0.0665	Prpf40a	pre-mRNA processing factor 40 homolog A (Prpf40a), transcript variant X1, mRNA
XM_028864850.2	7702	2.5	-1.97	0.535	3.41	5.19	0.0668	Zbtb16	zinc finger and BTB domain containing 16 (Zbtb16), transcript variant X1, mRNA
XM_037210596.1	3694	0.22	-1.2	1	0.3	200.13	0.0668	Trim9	tripartite motif containing 9 (Trim9), transcript variant X9, mRNA
XM_037202374.1	1213	26.67	-1.53	0.526	176.78	2.73	0.0668	Sirpb1	signal-regulatory protein beta-1-like (LOC114704110), transcript variant X2, mRNA
XM_037211632.1	6936	0.17	1.13	1	0.77	-6.86	0.0668	Ank1	ankyrin 1 (Ank1), transcript variant X4, mRNA
XM_028870305.2	5236	3.76	1.26	1	4.94	4.91	0.0669	Mysm1	Myb like, SWIRM and MPN domains 1 (Mysm1), transcript variant X1, mRNA
XM_037206365.1	2619	0	NaN	NaN	0.07	-106.82	0.0669	Sufu	SUFU negative regulator of hedgehog signaling (Sufu), transcript variant X1, mRNA
XM_037210037.1	3079	0.18	-63.49	0.0532	0.47	215.35	0.0669	LOC114697861	nuclear autoantigen Sp-100-like (LOC114697861), transcript variant X7, mRNA
XM_028892032.2	4981	0.08	122.69	0.0739	0.07	-106.58	0.0669	Phka1	phosphorylase kinase regulatory subunit alpha 1 (Phka1), transcript variant X7, mRNA
XM_028879643.2	2664	1.24	-1.88	1	0.25	140.58	0.0669	LOC114700136	GTPase IMAP family member 3-like (LOC114700136), transcript variant X3, mRNA
XM_028861354.1	4531	0.17	240.84	0.0603	0.17	155.46	0.0672	Mtmr1	myotubularin related protein 1 (Mtmr1), transcript variant X3, mRNA
XM_037201301.1	2467	3.09	1.37	1	11.6	-3.88	0.0672	Havcr1	hepatitis A virus cellular receptor 1 homolog (LOC114706385), transcript variant X2, mRNA
XM_037204114.1	1246	0.28	31.47	0.163	0.27	-107.33	0.0672	Rhno1	RAD9-HUS1-RAD1 interacting nuclear orphan 1 (Rhno1), transcript variant X5, mRNA
XM_028874528.2	3715	1.92	-1.8	0.864	0.48	27.67	0.0674	Acvrl1	activin A receptor like type 1 (Acvrl1), transcript variant X3, mRNA
XM_037204230.1	3210	0.18	6.89	0.655	2.98	-17.61	0.0674	Rasgef1a	RasGEF domain family member 1A (Rasgef1a), transcript variant X1, mRNA
XM_028890998.2	7669	0	NaN	NaN	0.08	161.58	0.0675	Tns3	tensin 3 (Tns3), transcript variant X5, mRNA
XM_028893219.2	2586	0.24	-2.88	1	0.14	-103.94	0.068	St3gal3	ST3 beta-galactoside alpha-2,3-sialyltransferase 3 (St3gal3), transcript variant X6, mRNA
XM_037210338.1	6903	0.38	2.24	1	0.17	209.85	0.0681	Creb1	cAMP responsive element binding protein 1 (Creb1), transcript variant X12, mRNA
XM_028891867.2	5568	0.22	396.82	0.0171	0.26	56.5	0.0683	Adcy6	adenylate cyclase 6 (Adcy6), transcript variant X5, mRNA
XM_037204789.1	5330	0.03	1.28	1	0.02	-106.13	0.0684	Fmnl2	formin like 2 (Fmnl2), transcript variant X9, mRNA
XM_037211318.1	3867	0	NaN	NaN	0.03	-106.13	0.0684	Kifap3	kinesin associated protein 3 (Kifap3), transcript variant X1, mRNA
XM_028878737.2	2908	20.82	-1.49	0.154	225.92	-4.05	0.0684	Slc28a2	solute carrier family 28 member 2 (Slc28a2), mRNA
XM_028893748.2	4822	0.12	-1.89	1	0.07	-106.09	0.0689	Lmo4	LIM domain only 4 (Lmo4), transcript variant X1, mRNA
XM_028882989.2	7436	0.2	-459.21	0.0222	0.18	-137.55	0.0689	Tmem245	transmembrane protein 245 (Tmem245), transcript variant X3, mRNA
XM_037200469.1	4244	0.1	1.1	1	0.08	-102.3	0.069	Phactr2	phosphatase and actin regulator 2 (Phactr2), transcript variant X6, mRNA
XM_037202226.1	1398	11.11	-1.25	1	67.47	2.43	0.0692	Tarm1	T-cell-interacting, activating receptor on myeloid cells protein 1-like (LOC114687526), mRNA
XM_028890117.2	1378	0.28	1.01	1	0.5	-184.34	0.0692	Csnk1a1	casein kinase 1 alpha 1 (Csnk1a1), transcript variant X7, mRNA
XM_037202966.1	1510	0	NaN	NaN	0.12	-104.53	0.0692	Tmem39b	transmembrane protein 39B (Tmem39b), transcript variant X3, mRNA
XM_037202200.1	2652	33.14	-1.2	1	23.61	2.32	0.0692	Lilra6	leukocyte immunoglobulin-like receptor subfamily A member 6 (LOC114688522), mRNA
XM_028873049.2	6985	1.38	34.44	6.29e-08	7.59	4.28	0.0693	Osbpl8	oxysterol binding protein like 8 (Osbpl8), transcript variant X5, mRNA
XM_028866553.2	879	100.84	1.17	1	53.57	3.23	0.0693	Cd3g	CD3g molecule (Cd3g), transcript variant X1, mRNA
XM_028875624.1	2099	0.06	8.42	0.431	0.06	-28.82	0.0694	Nr2f1	nuclear receptor subfamily 2 group F member 1 (Nr2f1), mRNA
XM_028857222.2	771	13.24	-1.12	1	22.55	-3.13	0.0694	Nhp2	NHP2 ribonucleoprotein (Nhp2), mRNA
XR_005092654.1	2728	0.32	-2.34	1	0.4	51.01	0.07	Ap1s3	adaptor related protein complex 1 subunit sigma 3 (Ap1s3), transcript variant X4, misc_RNA
XM_028873964.2	3805	0.37	486.17	0.024	0.37	37.91	0.07	Kdm4c	lysine demethylase 4C (Kdm4c), transcript variant X3, mRNA
XM_028853632.2	650	16.47	-1.08	1	15.06	-3.48	0.07	Anapc11	anaphase promoting complex subunit 11 (Anapc11), transcript variant X1, mRNA
XM_028863249.2	1924	0.17	1.07	1	0.41	-21.25	0.07	LOC114688722	retinol dehydrogenase 13 (LOC114688722), transcript variant X2, mRNA
XM_028893592.2	10028	0	NaN	NaN	0.1	148.28	0.07	Kif1b	kinesin family member 1B (Kif1b), transcript variant X4, mRNA
XM_037207371.1	1739	0.56	-42.3	0.0231	0.36	-39.99	0.0702	Tpm1	tropomyosin 1 (Tpm1), transcript variant X6, mRNA
XM_028868148.2	9558	0.12	355.19	0.0158	0.07	133.52	0.0702	Pcdh7	protocadherin 7 (Pcdh7), transcript variant X2, mRNA
XM_028883233.2	1222	0.98	1.35	1	0.67	27.14	0.0704	Spout1	SPOUT domain containing methyltransferase 1 (Spout1), transcript variant X2, mRNA
XM_028869791.2	3739	0.05	-61.62	0.151	0.7	-16.25	0.0704	Calcr	calcitonin receptor (Calcr), transcript variant X1, mRNA
XM_037207189.1	2332	0.02	-2.58	NaN	0.25	134.46	0.0704	Dnase2b	deoxyribonuclease 2 beta (Dnase2b), transcript variant X2, mRNA
XM_028888319.2	399	0.35	-1.82	1	1.02	-22.3	0.0704	LOC114706094	60S ribosomal protein L36a-like (LOC114706094), mRNA
XM_028891931.2	4316	0.42	-1.47	1	7.72	-4.29	0.0708	Vdr	vitamin D receptor (Vdr), mRNA
XM_037202059.1	1608	0.03	4.91	NaN	0.08	-102.99	0.0712	Meis3	Meis homeobox 3 (Meis3), transcript variant X8, mRNA
XM_037207573.1	3003	9.64	1.37	0.907	15.76	3.05	0.0713	Cbl	Cbl proto-oncogene (Cbl), transcript variant X2, mRNA
XM_037208719.1	2108	0.04	-3.44	1	0.09	-42.8	0.0714	Arhgap22	Rho GTPase activating protein 22 (Arhgap22), transcript variant X7, mRNA
XM_028883185.2	4124	5.86	1.61	0.647	4	-3.22	0.0716	Slc25a37	solute carrier family 25 member 37 (Slc25a37), transcript variant X2, mRNA
XM_028875388.2	3946	0.05	3.38	1	0.19	133.28	0.0716	Zbtb40	zinc finger and BTB domain containing 40 (Zbtb40), transcript variant X4, mRNA
XM_028864027.2	4249	0.11	155.72	0.0655	0.05	-53.86	0.0716	Washc2c	WASH complex subunit 2C (Washc2c), transcript variant X8, mRNA
XM_037199944.1	5252	0.54	1.26	1	0.31	237.42	0.0717	Agpat3	1-acylglycerol-3-phosphate O-acyltransferase 3 (Agpat3), transcript variant X5, mRNA
XM_028864699.2	4252	0.1	-5.5	0.559	0.08	-23.95	0.0719	Tcf4	transcription factor 4 (Tcf4), transcript variant X28, mRNA
XM_028859693.2	453	149.42	-1.08	1	85.29	-2.3	0.0723	Rpl36	ribosomal protein L36 (Rpl36), transcript variant X2, mRNA
XM_028876054.2	3327	7.73	1.15	1	16.3	-3.1	0.0727	Mthfd1	methylenetetrahydrofolate dehydrogenase, cyclohydrolase and formyltetrahydrofolate synthetase 1 (Mthfd1), transcript variant X1, mRNA
XM_028868528.2	4990	0.03	2.21	1	0.05	-86.15	0.0727	Zmynd8	zinc finger MYND-type containing 8 (Zmynd8), transcript variant X17, mRNA
XM_028861975.2	6304	0.01	1.47	NaN	0.13	-22.28	0.0731	Pwwp3b	PWWP domain containing 3B (Pwwp3b), transcript variant X1, mRNA
XM_037205009.1	3329	0.4	1.03	1	0.24	127.1	0.0732	LOC114703391	protein FAM111A-like (LOC114703391), transcript variant X5, mRNA
XM_028875081.2	2556	0.26	220.03	0.0448	4.15	5.97	0.0733	Acsl5	acyl-CoA synthetase long chain family member 5 (Acsl5), transcript variant X1, mRNA
XM_028857643.2	785	0.46	2.94	0.937	0.61	-23.6	0.0733	LOC114683349	60S ribosomal protein L6 (LOC114683349), mRNA
XM_028892893.2	3551	0.11	-80.92	0.111	0.24	146.37	0.0734	Slc10a7	solute carrier family 10 member 7 (Slc10a7), transcript variant X2, mRNA
XM_037209039.1	5393	0.24	-2.47	1	0.22	41.41	0.0735	Klf3	Kruppel like factor 3 (Klf3), transcript variant X3, mRNA
XM_028894357.2	7709	1.21	1.3	1	5.44	2.61	0.0736	Gvin1	interferon-induced very large GTPase 1-like (LOC114710254), mRNA
XM_028856801.2	4661	5.17	-1.1	1	18.33	2.16	0.0737	Stat3	signal transducer and activator of transcription 3 (Stat3), transcript variant X3, mRNA
XM_028858184.2	1528	0.2	1.13	1	7.47	-6.25	0.0737	Hpx	hemopexin (Hpx), mRNA
XM_037197985.1	432	0.21	-2.06	1	1.94	-17.89	0.0738	LOC114688001	interleukin-27 subunit beta-like (LOC114688001), mRNA
XM_037200303.1	6550	0.07	-2.1	1	0.14	145.31	0.0738	Adgrg6	adhesion G protein-coupled receptor G6 (Adgrg6), transcript variant X3, mRNA
XM_028855731.2	1827	0.37	232.24	0.0563	0.14	-41.33	0.0739	Morf4l2	mortality factor 4 like 2 (Morf4l2), transcript variant X3, mRNA
XM_028873278.2	5912	0.31	1.1	1	0.1	128.46	0.0739	Ccdc171	coiled-coil domain containing 171 (Ccdc171), transcript variant X1, mRNA
XM_028856358.2	1493	1.15	-1.39	1	1.85	-6.38	0.074	Acta1	actin alpha 1, skeletal muscle (Acta1), mRNA
XM_037210354.1	2293	0.16	2.65	1	0.11	-31.52	0.074	Raph1	Ras association (RalGDS/AF-6) and pleckstrin homology domains 1 (Raph1), transcript variant X8, mRNA
XR_003733610.2	894	1.43	1.08	1	3.31	10.87	0.074	LOC114686725	leukocyte immunoglobulin-like receptor subfamily A member 5 (LOC114686725), transcript variant X5, misc_RNA
XM_028890078.2	3110	0.15	-1.83	1	0.39	-10.1	0.074	Mb21d2	Mab-21 domain containing 2 (Mb21d2), mRNA
XM_028870482.2	9112	0.14	5.54	0.513	0.03	-26.6	0.0747	Nebl	nebulette (Nebl), transcript variant X1, mRNA
XM_028866040.2	2975	0.47	-1.14	1	63.89	3.45	0.0747	Pxylp1	2-phosphoxylose phosphatase 1 (Pxylp1), transcript variant X1, mRNA
XM_037197399.1	4718	0.3	2.67	1	0.2	-29.4	0.0747	Senp1	SUMO specific peptidase 1 (Senp1), transcript variant X6, mRNA
XM_028853621.2	1214	0.05	3.18	NaN	0.11	-84.43	0.0747	Pycr1	pyrroline-5-carboxylate reductase 1 (Pycr1), transcript variant X3, mRNA
XM_037205387.1	3393	0.11	-28.84	0.143	0.21	115.01	0.0748	Mroh8	maestro heat like repeat family member 8 (Mroh8), transcript variant X6, mRNA
XM_028889220.2	1600	6.48	-1.75	0.858	4.55	-4.39	0.0748	Nqo1	NAD(P)H quinone dehydrogenase 1 (Nqo1), mRNA
XM_028879990.1	1183	2.85	-1.48	1	10.22	-5.61	0.0748	Pdlim4	PDZ and LIM domain 4 (Pdlim4), transcript variant X1, mRNA
XM_037200366.1	3533	0.11	2.36	1	0.08	-96.84	0.0748	Pold1	DNA polymerase delta 1, catalytic subunit (Pold1), transcript variant X3, mRNA
XM_037201098.1	6556	0.28	1.15	1	0.15	141.02	0.0748	Zbtb4	zinc finger and BTB domain containing 4 (Zbtb4), transcript variant X4, mRNA
XM_037211702.1	4746	0.07	-88.97	0.102	0.13	127.87	0.0751	Tlr3	toll like receptor 3 (Tlr3), transcript variant X3, mRNA
XM_028873526.2	1217	13.68	-2.71	0.0352	4.12	-7.73	0.0753	Rnase4	ribonuclease A family member 4 (Rnase4), transcript variant X4, mRNA
XM_028873430.2	3677	1.59	1.58	1	11.49	-4.14	0.0756	Picalm	phosphatidylinositol binding clathrin assembly protein (Picalm), transcript variant X9, mRNA
XM_028854279.2	1047	11.13	-1.26	1	45.57	-4.54	0.076	Tppp3	tubulin polymerization promoting protein family member 3 (Tppp3), transcript variant X1, mRNA
XM_028862395.1	957	0.47	2.05	1	1.48	36.99	0.0761	LOC114687761	intelectin-1a-like (LOC114687761), mRNA
XM_028857609.2	5953	0.5	-2.11	1	0.05	-98.32	0.0761	Yeats2	YEATS domain containing 2 (Yeats2), transcript variant X1, mRNA
XM_028886482.2	3415	77.59	2.87	0.741	87	3.05	0.0763	Stk17b	serine/threonine kinase 17b (Stk17b), transcript variant X1, mRNA
XM_028894433.2	1297	13.55	-1.26	1	13.97	-3.22	0.0763	Ap1s1	adaptor related protein complex 1 subunit sigma 1 (Ap1s1), mRNA
XM_037199187.1	348	0.15	4.15	NaN	2.2	-24.29	0.0763	LOC114710008	60S ribosomal protein L37-like (LOC114710008), mRNA
XM_028871144.2	1476	17.7	-1.62	0.551	19.41	3.07	0.0768	LOC114694261	casein kinase I (LOC114694261), transcript variant X4, mRNA
XM_028887878.2	3162	0.58	2.55	0.929	0.17	110.26	0.0768	LOC114705793	spermatid perinuclear RNA binding protein (LOC114705793), transcript variant X2, mRNA
XM_028873084.2	9986	0.32	-1.44	1	0.1	190.74	0.0768	Nav3	neuron navigator 3 (Nav3), transcript variant X2, mRNA
XM_028880638.2	4532	1.52	1.26	1	1.84	-4.07	0.0768	Wipf1	WAS/WASL interacting protein family member 1 (Wipf1), transcript variant X5, mRNA
XM_028854380.2	1988	0.06	-5.94	0.715	0.47	-111.6	0.0768	LOC114681092	acylcarnitine hydrolase-like (LOC114681092), transcript variant X1, mRNA
XM_028859285.1	2145	0.5	-1.29	1	0.22	-146.64	0.0768	Eef1d	eukaryotic translation elongation factor 1 delta (Eef1d), transcript variant X3, mRNA
XM_037203539.1	3634	0.11	1.23	1	0.16	-28.95	0.0768	LOC114687570	phosphatidylcholine translocator ABCB4 (LOC114687570), transcript variant X4, mRNA
XM_037210913.1	2710	0.59	1.05	1	0.37	165	0.0769	Mta1	metastasis associated 1 (Mta1), transcript variant X9, mRNA
XM_037207545.1	1456	48.46	-1.59	0.39	65.46	2.72	0.077	Jaml	junction adhesion molecule like (Jaml), transcript variant X3, mRNA
XM_028856983.2	4133	1.33	1.31	1	1.38	5.46	0.0771	LOC114682895	zinc finger protein 26-like (LOC114682895), mRNA
XM_028869924.2	5103	1.38	-2.71	0.494	0.74	-6.55	0.0772	Rab6b	RAB6B, member RAS oncogene family (Rab6b), mRNA
XM_037200787.1	2437	0.34	1.1	1	0.14	-31.39	0.0772	Anks3	ankyrin repeat and sterile alpha motif domain containing 3 (Anks3), transcript variant X1, mRNA
XM_037209237.1	1374	0.05	-4.53	NaN	0.22	-96.04	0.0775	Spp1	secreted phosphoprotein 1 (Spp1), transcript variant X2, mRNA
XM_037202569.1	6629	0.06	1.11	1	0.05	-94.57	0.0776	Pax5	paired box 5 (Pax5), transcript variant X1, mRNA
XR_005090292.1	1589	0	NaN	NaN	0.21	-94.05	0.0776	Gdpd1	glycerophosphodiester phosphodiesterase domain containing 1 (Gdpd1), transcript variant X2, misc_RNA
XM_037198941.1	309	0.16	-1.43	NaN	0.34	-97.81	0.0776	LOC114681370	10 kDa heat shock protein, mitochondrial-like (LOC114681370), mRNA
XM_028856355.2	2949	17.26	-1.3	0.969	46.22	2.85	0.0777	LOC114682475	granulocyte-macrophage colony-stimulating factor receptor subunit alpha-like (LOC114682475), transcript variant X1, mRNA
XM_028888461.2	4642	7.6	-1.01	1	16.75	2.38	0.0779	Ikbkg	inhibitor of nuclear factor kappa B kinase regulatory subunit gamma (Ikbkg), transcript variant X2, mRNA
XM_028873216.2	583	2.71	14.1	0.0852	0.54	-23.51	0.0779	Smpx	small muscle protein X-linked (Smpx), mRNA
XM_028887521.2	6183	0.69	-1.27	1	0.09	122.01	0.0779	Nol4l	nucleolar protein 4 like (Nol4l), transcript variant X1, mRNA
XM_028860100.2	2994	4.52	-1.17	1	7.52	3.25	0.0779	B4galt3	beta-1,4-galactosyltransferase 3 (B4galt3), transcript variant X2, mRNA
XM_028869836.2	1446	0.44	1.03	1	0.41	107.68	0.0781	Sirt3	sirtuin 3 (Sirt3), transcript variant X3, mRNA
XM_037203218.1	5648	0.79	-1.01	1	0.1	139.98	0.0786	Camta1	calmodulin binding transcription activator 1 (Camta1), transcript variant X13, mRNA
XM_037209634.1	1194	0.08	1.08	1	0.21	-29.65	0.0786	Setd4	SET domain containing 4 (Setd4), transcript variant X4, mRNA
XM_028854247.2	2363	0.23	-1.2	1	0.39	33.12	0.0786	Lrrc29	leucine rich repeat containing 29 (Lrrc29), transcript variant X3, mRNA
XM_037205310.1	6140	0.15	-1.25	1	0.18	43.63	0.0791	Kif3b	kinesin family member 3B (Kif3b), transcript variant X2, mRNA
XM_028882212.2	387	0.85	2.2	1	0.88	-15.17	0.0791	LOC114701995	60S ribosomal protein L36a-like (LOC114701995), mRNA
XM_037207208.1	4921	0.04	2.45	1	0.14	121.54	0.0794	Sec31b	SEC31 homolog B, COPII coat complex component (Sec31b), transcript variant X4, mRNA
XM_028860987.2	4240	7.39	1.13	1	6.68	-2.55	0.0798	Kif1c	kinesin family member 1C (Kif1c), mRNA
XM_028884458.2	2467	0.07	1.92	1	0.15	34.21	0.0798	Zswim2	zinc finger SWIM-type containing 2 (Zswim2), mRNA
XM_037197558.1	1130	0.43	-1.13	1	1.5	-11.02	0.0798	LOC114684749	glycosylphosphatidylinositol-anchored high density lipoprotein-binding protein 1 (LOC114684749), transcript variant X2, mRNA
XM_037208444.1	1484	3.05	1.59	1	3.19	203.04	0.0799	Clu	clusterin (Clu), transcript variant X3, mRNA
XM_028888468.2	6629	0.74	-2.08	0.962	0.19	163.33	0.0803	Plxnb3	plexin B3 (Plxnb3), transcript variant X3, mRNA
XR_005090774.1	1305	0.25	1.41	1	2.84	6.86	0.0804	LOC119087363	uncharacterized LOC119087363 (LOC119087363), transcript variant X2, ncRNA
XM_037205819.1	4405	0.28	-1.23	1	0.14	118.56	0.0805	Prpf4b	pre-mRNA processing factor 4B (Prpf4b), transcript variant X10, mRNA
XM_028883353.2	3713	0.27	-3.34	0.977	0.26	134.41	0.0806	Ralgds	ral guanine nucleotide dissociation stimulator (Ralgds), transcript variant X9, mRNA
XM_037205433.1	1885	1.21	-1.23	1	1.22	10.84	0.0806	Stx16	syntaxin 16 (Stx16), transcript variant X4, mRNA
XR_005090313.1	6102	0.38	-2.14	1	0.04	-92.36	0.0806	Faap100	FA core complex associated protein 100 (Faap100), transcript variant X2, misc_RNA
XM_028885360.2	1945	0.48	-274.88	0.015	0.15	-31.23	0.0807	LOC114704215	uncharacterized LOC114704215 (LOC114704215), transcript variant X2, mRNA
XM_037209165.1	1230	11.87	-1	1	25.67	2.68	0.0807	Taldo1	transaldolase 1 (Taldo1), transcript variant X2, mRNA
XM_028870272.2	1881	0.08	1.86	1	0.32	119.3	0.0808	Slc25a22	solute carrier family 25 member 22 (Slc25a22), transcript variant X2, mRNA
XM_037210638.1	4849	0.5	-6.27	0.37	0.12	116.9	0.0809	Plekhg3	pleckstrin homology and RhoGEF domain containing G3 (Plekhg3), transcript variant X3, mRNA
XM_037198152.1	4830	8.59	-1.12	1	18.19	2.3	0.0809	Cyria	CYFIP related Rac1 interactor A (Cyria), transcript variant X2, mRNA
XM_037200025.1	875	0.05	-11.81	NaN	0.11	-96.96	0.0809	Aif1	allograft inflammatory factor 1 (Aif1), transcript variant X5, mRNA
XM_028878371.2	5680	0.32	15.68	0.0469	0.2	31.68	0.0809	Tsc22d1	TSC22 domain family member 1 (Tsc22d1), transcript variant X2, mRNA
XM_028891816.2	7213	1.35	-1.57	0.985	0.76	8.84	0.0809	Camk1d	calcium/calmodulin dependent protein kinase ID (Camk1d), transcript variant X3, mRNA
XM_028871978.2	4305	1.09	-1.16	1	2.06	6.55	0.0811	C19H18orf25	chromosome 19 C18orf25 homolog (C19H18orf25), transcript variant X3, mRNA
XM_037197305.1	566	2.99	1.11	1	3.62	19.71	0.0812	LOC114709792	cystatin-B-like (LOC114709792), mRNA
XM_028872465.2	3528	0.04	-2.45	1	0.19	134.4	0.0813	Dnm2	dynamin 2 (Dnm2), transcript variant X4, mRNA
XM_037206440.1	9098	0.38	1.14	1	0.04	-43.54	0.0813	Celf2	CUGBP Elav-like family member 2 (Celf2), transcript variant X13, mRNA
XM_037208430.1	2940	142.6	-1.08	1	31.87	3.04	0.0813	Adamdec1	disintegrin and metalloproteinase domain-containing protein 28 (LOC114702671), transcript variant X6, mRNA
XM_028887272.2	4542	0.04	-50.35	0.161	0.03	-92.46	0.0814	Adgrf5	adhesion G protein-coupled receptor F5 (Adgrf5), transcript variant X3, mRNA
XM_028859708.2	2113	0.17	-25.33	0.182	3.39	6.84	0.0814	Plin5	perilipin 5 (Plin5), transcript variant X1, mRNA
XR_005092526.1	889	6.77	-1.62	0.992	6.42	7.6	0.0814	LOC119088797	uncharacterized LOC119088797 (LOC119088797), transcript variant X2, ncRNA
XM_028888550.2	3753	0.65	1.43	1	1	18.42	0.0816	Arhgap4	Rho GTPase activating protein 4 (Arhgap4), transcript variant X3, mRNA
XM_028890871.2	3930	0.1	1.55	1	0.16	118.14	0.0816	Ubap2l	ubiquitin associated protein 2 like (Ubap2l), transcript variant X3, mRNA
XM_037204640.1	3110	0.64	1.89	1	0.37	179.75	0.0816	Wdr5	WD repeat domain 5 (Wdr5), transcript variant X2, mRNA
XM_037211592.1	4999	0.6	-705.34	0.00735	0.13	41.43	0.0817	Mcf2l	MCF.2 cell line derived transforming sequence like (Mcf2l), transcript variant X8, mRNA
XM_037209976.1	12636	0.14	1.31	1	0.08	24.77	0.0817	Prkdc	protein kinase, DNA-activated, catalytic subunit (Prkdc), transcript variant X2, mRNA
XM_028878179.2	1754	0.19	1.39	1	0.73	192.61	0.0818	Gtse1	G2 and S-phase expressed 1 (Gtse1), transcript variant X1, mRNA
XM_028858590.2	1885	0.06	-2.94	1	0.1	-91.01	0.0819	Fstl3	follistatin like 3 (Fstl3), transcript variant X1, mRNA
XM_037197640.1	4869	2.09	1.52	1	30.42	4.58	0.082	Csf2rb	colony stimulating factor 2 receptor subunit beta (Csf2rb), transcript variant X6, mRNA
XM_037198741.1	5696	0.39	-537.33	0.00832	0.25	210.3	0.0821	Sbno1	strawberry notch homolog 1 (Sbno1), transcript variant X4, mRNA
XM_028862865.2	2331	0.19	-1.19	1	0.38	131.53	0.0821	LOC114688238	EF-hand calcium-binding domain-containing protein 1-like (LOC114688238), transcript variant X2, mRNA
XM_028888739.2	1054	14.23	1.26	1	17.96	2.82	0.0822	LOC114706356	olfactory receptor 1468-like (LOC114706356), mRNA
XM_037202849.1	2480	0.18	-1.11	1	0.27	36.09	0.0822	Hectd3	HECT domain E3 ubiquitin protein ligase 3 (Hectd3), transcript variant X3, mRNA
XM_028886908.2	3554	0.71	1.56	1	0.88	-10.33	0.0822	Dhx30	DExH-box helicase 30 (Dhx30), transcript variant X8, mRNA
XM_037196774.1	6827	0.28	1.2	1	0.81	8.07	0.0824	Osbpl8	oxysterol binding protein like 8 (Osbpl8), transcript variant X2, mRNA
XM_028877760.2	2664	0.25	2.4	1	0.19	31.35	0.0824	Dpy19l3	dpy-19 like C-mannosyltransferase 3 (Dpy19l3), transcript variant X2, mRNA
XM_037204829.1	2823	0.05	1.38	1	0.23	116.13	0.0824	Fap	fibroblast activation protein alpha (LOC114690471), transcript variant X3, mRNA
XM_037210177.1	10690	4.93	1.34	0.754	3.91	2.36	0.0827	Ankrd12	ankyrin repeat domain 12 (Ankrd12), transcript variant X3, mRNA
XM_028892362.2	3104	1.13	7.58	0.108	0.35	184.68	0.0829	Cenpc	centromere protein C (Cenpc), transcript variant X2, mRNA
XM_028872412.2	1203	0.09	1.29	1	0.18	-25.54	0.083	LOC114695191	protein SET-like (LOC114695191), mRNA
XM_028876471.2	3756	5.44	1.21	1	3.23	4.61	0.0832	Ephb6	EPH receptor B6 (Ephb6), mRNA
XM_037202955.1	2015	0.05	-4.57	1	0.09	-90.85	0.0833	LOC114682050	gasdermin-D-like (LOC114682050), transcript variant X1, mRNA
XM_028864812.2	15067	4.51	1.2	1	3.21	2.45	0.0834	Mycbp2	MYC binding protein 2 (Mycbp2), transcript variant X9, mRNA
XM_028884093.2	2867	0.25	-191.41	0.0398	0.32	-25.54	0.0835	Acsl3	acyl-CoA synthetase long chain family member 3 (Acsl3), transcript variant X2, mRNA
XM_028870615.2	1950	3.99	1.18	1	1.41	13.42	0.0835	Emid1	EMI domain containing 1 (Emid1), transcript variant X5, mRNA
XR_005091404.1	3487	2.44	-1.25	1	3.8	3.46	0.0835	LOC119087893	uncharacterized LOC119087893 (LOC119087893), transcript variant X1, ncRNA
XM_028866422.2	2041	35.27	-1.19	1	56.32	2.62	0.0838	Jaml	junction adhesion molecule like (Jaml), transcript variant X1, mRNA
XM_037204271.1	3572	0.03	4.12	0.993	0.32	178.22	0.0839	LOC114689602	tubulin monoglycylase TTLL3 (LOC114689602), transcript variant X1, mRNA
XM_037205650.1	2877	0.19	-1.75	1	0.05	-89.94	0.0841	Fancc	FA complementation group C (Fancc), transcript variant X2, mRNA
XM_028877315.2	4185	0.2	1.07	1	0.19	128.89	0.0844	Csde1	cold shock domain containing E1 (Csde1), transcript variant X2, mRNA
XM_037203880.1	10308	0.19	7.01	0.313	0.12	21.91	0.0844	Aak1	AP2 associated kinase 1 (Aak1), transcript variant X6, mRNA
XR_005089640.1	815	6.72	-1.11	1	6.59	5.6	0.0846	LOC119086367	uncharacterized LOC119086367 (LOC119086367), ncRNA
XM_028870992.2	1923	0.31	7.44	0.375	0.2	-31.03	0.0847	Cdkn1c	cyclin dependent kinase inhibitor 1C (Cdkn1c), transcript variant X7, mRNA
XM_028891774.2	2648	0.04	1.55	1	0.14	-28.67	0.0847	Sox5	SRY-box transcription factor 5 (Sox5), transcript variant X4, mRNA
XM_028881334.2	8506	0.22	-1.99	1	0.09	-18.71	0.0848	Clcn5	chloride voltage-gated channel 5 (Clcn5), transcript variant X3, mRNA
XM_028891750.2	4725	8.43	-1.15	1	29.58	2.78	0.0848	Pik3cg	phosphatidylinositol-4,5-bisphosphate 3-kinase catalytic subunit gamma (Pik3cg), transcript variant X1, mRNA
XM_037202752.1	2955	0.11	-1.51	1	0.38	52.69	0.085	Mier1	MIER1 transcriptional regulator (Mier1), transcript variant X10, mRNA
XM_028860656.2	4471	7.98	-1.48	0.469	30.63	2.64	0.0851	Hip1	huntingtin interacting protein 1 (Hip1), mRNA
XM_037205165.1	2566	0.16	-1.29	1	0.1	-88.13	0.0851	Cep78	centrosomal protein 78 (Cep78), transcript variant X1, mRNA
XM_037198404.1	4234	0.95	-234.3	0.024	0.67	-14.7	0.0851	Pnpla6	patatin like phospholipase domain containing 6 (Pnpla6), transcript variant X9, mRNA
XM_028858866.2	1696	0.12	-48.39	0.193	0.34	100.92	0.0852	Pole2	DNA polymerase epsilon 2, accessory subunit (Pole2), transcript variant X2, mRNA
XM_037207825.1	4781	0.1	-2.04	1	0.11	102.63	0.0852	Cep162	centrosomal protein 162 (Cep162), transcript variant X2, mRNA
XM_037208800.1	3836	0	NaN	NaN	0.2	128.58	0.0852	Osbpl5	oxysterol binding protein like 5 (Osbpl5), transcript variant X3, mRNA
XM_028867281.2	1916	2.18	-1.64	1	4.46	-5.1	0.0854	Cds1	CDP-diacylglycerol synthase 1 (Cds1), mRNA
XM_037209419.1	2749	0.47	1.8	1	0.25	130.18	0.0854	Znf131	zinc finger protein 131 (Znf131), transcript variant X2, mRNA
XM_037210240.1	2850	2.01	1.21	1	0.47	228.5	0.0854	Acsl3	acyl-CoA synthetase long chain family member 3 (Acsl3), transcript variant X3, mRNA
XM_028884891.2	3367	0.22	-6.44	0.692	0.06	-86.72	0.0855	Zscan22	zinc finger and SCAN domain containing 22 (Zscan22), transcript variant X2, mRNA
XM_028882774.2	5756	8.7	-1.04	1	25.67	2.4	0.0855	Tgfbr1	transforming growth factor beta receptor 1 (Tgfbr1), transcript variant X2, mRNA
XR_005090632.1	3722	0.07	1.27	1	0.18	32.4	0.0855	LOC114689445	uncharacterized LOC114689445 (LOC114689445), transcript variant X2, ncRNA
XM_028860043.2	3130	0.21	2.39	1	0.23	130.67	0.0857	Lrrfip2	LRR binding FLII interacting protein 2 (Lrrfip2), transcript variant X16, mRNA
XM_037202611.1	2148	0.94	-2.17	1	1.96	7.6	0.0857	Slc31a2	solute carrier family 31 member 2 (Slc31a2), transcript variant X2, mRNA
XM_028889388.2	2171	18.03	-1.18	1	37.74	2.24	0.0858	Entpd1	ectonucleoside triphosphate diphosphohydrolase 1 (Entpd1), mRNA
XM_028871510.2	6624	0.13	-1.37	1	0.18	190.7	0.0858	Rpgrip1l	RPGRIP1 like (Rpgrip1l), transcript variant X5, mRNA
XM_028880093.2	5737	0.05	-5.46	1	0.05	-91.97	0.0858	Acvr2a	activin A receptor type 2A (Acvr2a), transcript variant X1, mRNA
XM_037206859.1	2750	1.03	-1.36	1	6.76	3.08	0.0858	Pglyrp4	peptidoglycan recognition protein 4-like (LOC114707960), mRNA
XM_037211446.1	7334	0.59	-1.86	1	0.1	130.64	0.0858	Pfkfb2	6-phosphofructo-2-kinase/fructose-2,6-biphosphatase 2 (Pfkfb2), transcript variant X5, mRNA
XM_037205771.1	1377	0.44	-2.03	1	0.57	28.57	0.0861	Sirt5	sirtuin 5 (Sirt5), transcript variant X5, mRNA
XM_037209398.1	10299	0.06	-3.09	1	0.03	-87.36	0.0861	Cplane1	ciliogenesis and planar polarity effector 1 (Cplane1), transcript variant X2, mRNA
XM_028888784.2	3639	21.47	-1.21	1	13.94	-2.95	0.0864	LOC114706394	interferon-inducible GTPase family member Mus musculus; SDA08595.1; uncharacterized LOC114706394 (LOC114706394), transcript variant X1, mRNA
XM_028884568.2	10025	0	-1.71	NaN	0.01	-92.75	0.0864	Sox6	SRY-box transcription factor 6 (Sox6), transcript variant X13, mRNA
XM_028892886.2	924	0.51	-1.72	1	0.49	91.67	0.0867	Mmaa	metabolism of cobalamin associated A (Mmaa), transcript variant X5, mRNA
XM_037204577.1	4935	0.28	-1.11	1	0.31	182.64	0.0868	LOC114685690	inner centromere protein (LOC114685690), transcript variant X2, mRNA
XR_005090696.1	4943	0.43	532.97	0.0177	0.18	168.93	0.0869	LOC119087273	uncharacterized LOC119087273 (LOC119087273), transcript variant X1, ncRNA
XM_028882348.2	12161	0.69	1.55	1	0.38	5.6	0.0871	C10H4orf50	chromosome 10 C4orf50 homolog (C10H4orf50), mRNA
XM_028858166.1	1998	0.19	122.08	0.0882	0.08	-79.66	0.0872	Apbb1	amyloid beta precursor protein binding family B member 1 (Apbb1), transcript variant X7, mRNA
XM_028856991.2	8369	0.04	1.07	1	0.1	125.46	0.0872	Golga3	golgin A3 (Golga3), transcript variant X4, mRNA
XM_028870046.2	9010	0.24	1.67	1	0.11	-116.65	0.0872	Ikzf2	IKAROS family zinc finger 2 (Ikzf2), transcript variant X9, mRNA
XM_037200249.1	2124	0.12	-1.11	1	0.26	115.13	0.0872	C1H19orf48	chromosome 1 C19orf48 homolog (C1H19orf48), transcript variant X3, mRNA
XM_037210564.1	2714	9.99	-1.31	1	8.36	-2.99	0.0872	Mia2	MIA SH3 domain ER export factor 2 (Mia2), transcript variant X8, mRNA
XM_037208191.1	3112	0.17	-134.88	0.0666	0.08	-18.36	0.0873	Rgs12	regulator of G protein signaling 12 (Rgs12), transcript variant X4, mRNA
XR_003733609.2	925	5.11	-1.14	1	10.24	4.71	0.0873	LOC114686725	leukocyte immunoglobulin-like receptor subfamily A member 5 (LOC114686725), transcript variant X4, misc_RNA
XM_028869007.2	1788	82.4	-1.13	1	72.11	-2.98	0.0876	Phospho1	phosphoethanolamine/phosphocholine phosphatase 1 (Phospho1), transcript variant X1, mRNA
XM_037205309.1	5130	1.28	2.35	1	2.37	-6.92	0.0876	Plagl2	PLAG1 like zinc finger 2 (Plagl2), transcript variant X3, mRNA
XM_028863030.2	2759	0.39	-1.4	1	0.35	165.91	0.0877	Cnot3	CCR4-NOT transcription complex subunit 3 (Cnot3), transcript variant X4, mRNA
XM_028881895.2	2462	0.06	1.54	1	0.12	-20.8	0.088	Mthfd2l	methylenetetrahydrofolate dehydrogenase (NADP+ dependent) 2 like (Mthfd2l), transcript variant X1, mRNA
XM_037196955.1	1154	1.56	-12.88	0.0934	0.57	32.77	0.0882	LOC114706605	folate receptor beta-like (LOC114706605), mRNA
XM_028859818.2	5050	0.72	5.88	0.342	0.12	-18.04	0.0882	Myom2	myomesin 2 (Myom2), mRNA
XM_037210629.1	21687	0.83	1.07	1	1.08	4.43	0.0882	Syne2	spectrin repeat containing nuclear envelope protein 2 (Syne2), transcript variant X9, mRNA
XM_028869171.2	3873	0.13	60.61	0.288	0.14	113.66	0.0885	Ppp6r2	protein phosphatase 6 regulatory subunit 2 (Ppp6r2), transcript variant X2, mRNA
XM_028855792.2	1731	32.51	1.07	1	30.82	-2.29	0.0885	Gnas	guanine nucleotide-binding protein G(s) subunit alpha (LOC114682029), transcript variant X1, mRNA
XM_028886989.2	5340	0.13	-169.49	0.071	0.1	-152.63	0.0886	Dag1	dystroglycan 1 (Dag1), transcript variant X4, mRNA
XM_028878233.2	2335	0.85	2.11	1	8.47	-5.9	0.0888	Mpo	myeloperoxidase (LOC114699257), mRNA
XM_028891382.2	8538	0.13	-321.05	0.0262	0.1	171.7	0.089	LOC114708237	solute carrier family 35 member E2A (LOC114708237), transcript variant X3, mRNA
XR_005092536.1	1485	0.05	1.48	1	0.14	-70.04	0.089	LOC119088800	uncharacterized LOC119088800 (LOC119088800), transcript variant X2, ncRNA
XM_037201958.1	4011	0.26	22.37	0.101	0.05	-22.59	0.0892	LOC114701262	myomesin-2 (LOC114701262), mRNA
XM_028882596.2	2012	0.43	1.29	1	0.16	-28.47	0.0892	Rundc3a	RUN domain containing 3A (Rundc3a), transcript variant X1, mRNA
XM_037211232.1	2510	0.95	1.83	1	0.42	49.63	0.0893	Slamf6	SLAM family member 6 (Slamf6), transcript variant X5, mRNA
XM_028887150.2	5554	0.32	-112.54	0.00785	0.1	-26.67	0.0893	Cul7	cullin 7 (Cul7), transcript variant X1, mRNA
XM_037203736.1	2609	0.54	3.36	0.812	0.1	-83.55	0.0893	Galnt11	polypeptide N-acetylgalactosaminyltransferase 11 (Galnt11), transcript variant X3, mRNA
XM_028887749.2	2185	0.72	1.35	1	0.44	163.76	0.0893	Ap1s2	adaptor related protein complex 1 subunit sigma 2 (Ap1s2), transcript variant X2, mRNA
XR_005089713.1	3053	2.11	-1.35	1	15.18	2.71	0.0893	LOC119086426	uncharacterized LOC119086426 (LOC119086426), transcript variant X1, ncRNA
XM_028870606.2	2434	0.23	6.05	0.513	0.22	-29.66	0.0893	Ewsr1	EWS RNA binding protein 1 (Ewsr1), transcript variant X1, mRNA
XM_028888514.2	5255	0.03	4.25	0.908	0.09	113.24	0.0894	L1cam	L1 cell adhesion molecule (L1cam), transcript variant X1, mRNA
XM_037203990.1	4352	0.18	-96.61	0.0353	0.13	108.26	0.0894	Stk38l	serine/threonine kinase 38 like (Stk38l), transcript variant X4, mRNA
XM_037203917.1	2179	0.32	-1.14	1	0.29	-152.58	0.0895	Slc6a6	solute carrier family 6 member 6 (Slc6a6), transcript variant X5, mRNA
XM_028880232.2	6755	0.21	-384.85	0.00731	0.04	-84.43	0.0896	Nedd1	NEDD1 gamma-tubulin ring complex targeting factor (Nedd1), transcript variant X2, mRNA
XM_028867611.2	4978	6.95	-1.59	0.201	13.36	2.33	0.0896	Cyria	CYFIP related Rac1 interactor A (Cyria), transcript variant X1, mRNA
XM_028886761.2	2572	0.3	-1.2	1	0.21	109.67	0.0898	Cxxc5	CXXC finger protein 5 (Cxxc5), transcript variant X1, mRNA
XM_028890541.2	6863	15.73	-1.08	1	31.16	2.55	0.0901	Usp32	ubiquitin specific peptidase 32 (Usp32), transcript variant X2, mRNA
XM_028882695.1	4959	0.12	-1.65	1	0.17	120.67	0.0902	Cdc27	cell division cycle 27 (Cdc27), transcript variant X11, mRNA
XM_037200262.1	2087	0	NaN	NaN	0.12	-83.55	0.0902	C1H19orf48	chromosome 1 C19orf48 homolog (C1H19orf48), transcript variant X8, mRNA
XM_028866144.2	1659	0.06	-2.69	NaN	0.1	-19.56	0.0902	LOC114691033	aldose reductase-related protein 2-like (LOC114691033), mRNA
XM_037202503.1	1946	0.01	4.14	NaN	0.13	-82.25	0.0903	Aptx	aprataxin (Aptx), transcript variant X6, mRNA
XM_037201437.1	3495	0.06	-60.84	0.151	0.07	-81.02	0.0905	Mapt	microtubule associated protein tau (Mapt), transcript variant X9, mRNA
XM_037197953.1	2399	0.12	-1.18	1	0.2	131.35	0.091	Pram1	PML-RARA regulated adaptor molecule 1 (Pram1), transcript variant X3, mRNA
XM_028853661.2	947	0	NaN	NaN	0.11	-85.42	0.0911	Rac3	Rac family small GTPase 3 (Rac3), transcript variant X3, mRNA
XM_037196759.1	1339	0.17	2.92	1	0.3	-24.5	0.0912	Thap2	THAP domain containing 2 (Thap2), transcript variant X5, mRNA
XM_028864581.2	8761	1.61	1.36	1	1.09	5.19	0.0913	Slco5a1	solute carrier organic anion transporter family member 5A1 (Slco5a1), transcript variant X1, mRNA
XM_037196829.1	1875	5.54	-2.64	0.397	2.29	-9.54	0.0915	Nr1h4	nuclear receptor subfamily 1 group H member 4 (Nr1h4), transcript variant X4, mRNA
XM_028887977.2	3214	2.22	1.48	1	4.75	-4.4	0.0915	Plpp3	phospholipid phosphatase 3 (Plpp3), mRNA
XM_037209734.1	5410	0.07	-1.6	1	0.12	115.05	0.0917	Phldb2	pleckstrin homology like domain family B member 2 (Phldb2), transcript variant X5, mRNA
XR_003734525.2	1215	0.65	2.25	1	0.49	46.66	0.0918	Usp15	ubiquitin specific peptidase 15 (Usp15), transcript variant X7, misc_RNA
XM_028877493.1	2019	6.17	-1.76	0.944	82.95	2.97	0.0919	Dgat2	diacylglycerol O-acyltransferase 2 (Dgat2), transcript variant X4, mRNA
XM_028863348.2	567	55.59	1.06	1	46.09	-2.53	0.0922	Ndufa11	NADH:ubiquinone oxidoreductase subunit A11 (Ndufa11), mRNA
XM_028854474.2	2917	0.7	-9.5	0.14	0.4	29.9	0.0922	Tmem87a	transmembrane protein 87A (Tmem87a), transcript variant X1, mRNA
XM_028857068.2	12552	0.03	2.47	1	0.06	28.07	0.0922	Dchs2	dachsous cadherin-related 2 (Dchs2), mRNA
XM_028856148.2	2770	0.08	16.1	0.272	0.06	-83.06	0.0923	Dmpk	DM1 protein kinase (Dmpk), transcript variant X5, mRNA
XM_028881097.2	3577	1.34	1.35	1	2.07	4.6	0.0923	Hnrnph3	heterogeneous nuclear ribonucleoprotein H3 (Hnrnph3), transcript variant X1, mRNA
XM_028874585.2	8964	0.25	-1.16	1	0.11	175.76	0.0924	Dip2b	disco interacting protein 2 homolog B (Dip2b), transcript variant X1, mRNA
XM_037210916.1	2710	0.56	1.39	1	0.18	97.65	0.0925	Cdca7l	cell division cycle associated 7 like (Cdca7l), transcript variant X1, mRNA
XM_028877124.2	7132	0.07	4.06	0.992	0.13	174.01	0.0926	Synj1	synaptojanin 1 (Synj1), transcript variant X4, mRNA
XM_028859691.2	455	156.79	-1.12	1	90.2	-2.17	0.0926	Rpl36	ribosomal protein L36 (Rpl36), transcript variant X1, mRNA
XM_028884964.2	5041	0.24	1.22	1	0.84	-15.13	0.0927	Foxk2	forkhead box K2 (Foxk2), transcript variant X1, mRNA
XM_028860386.2	3279	0.12	1.07	1	2.39	-6.96	0.0929	Fzd7	frizzled class receptor 7 (Fzd7), mRNA
XM_028871434.2	3268	3.5	-1.52	1	0.96	10.75	0.0929	Kifc3	kinesin family member C3 (Kifc3), transcript variant X10, mRNA
XM_028869983.2	2801	0.71	-2.66	1	0.31	150.92	0.0929	Cep70	centrosomal protein 70 (Cep70), transcript variant X2, mRNA
XM_028893841.2	5536	12.28	-1.57	0.696	12.5	-2.76	0.0932	Gda	guanine deaminase (Gda), transcript variant X1, mRNA
XM_037200856.1	2469	0.29	214.04	0.0359	0.41	180.75	0.0933	Mks1	MKS transition zone complex subunit 1 (Mks1), transcript variant X4, mRNA
XM_028877429.2	3290	0.21	-3.54	0.826	0.22	41.81	0.0933	Tpbgl	trophoblast glycoprotein like (Tpbgl), mRNA
XM_037199801.1	1101	0.31	3.12	0.956	0.43	88.43	0.0933	Stk19	serine/threonine kinase 19 (Stk19), transcript variant X2, mRNA
XM_037203716.1	2595	0.82	-2.4	1	0.53	18.21	0.0933	LOC114700096	GTPase IMAP family member 5-like (LOC114700096), transcript variant X7, mRNA
XM_028893102.2	2723	56.48	-1.33	0.881	299.48	2.79	0.0938	Cxcr2	C-X-C chemokine receptor type 2 (LOC114709324), transcript variant X1, mRNA
XM_037208038.1	2757	0.52	3.21	0.766	0.22	104.39	0.0938	Gorasp1	golgi reassembly stacking protein 1 (Gorasp1), transcript variant X4, mRNA
XM_037201403.1	3840	0	NaN	NaN	0.13	124.7	0.0938	Dlg4	discs large MAGUK scaffold protein 4 (Dlg4), transcript variant X9, mRNA
XM_028875461.2	4214	19.94	1.06	1	27.99	-2.32	0.0938	Clic4	chloride intracellular channel 4 (Clic4), mRNA
XM_037210287.1	3190	0.09	-75.63	0.0882	0.2	31.69	0.0941	Rufy4	RUN and FYVE domain containing 4 (Rufy4), transcript variant X6, mRNA
XR_005090843.1	1397	0.99	1.08	1	0.36	90.16	0.0941	LOC119087409	uncharacterized LOC119087409 (LOC119087409), ncRNA
XM_028877090.2	10015	8.65	1.34	0.603	11.29	2.33	0.0944	Son	SON DNA and RNA binding protein (Son), transcript variant X5, mRNA
XM_037206602.1	6822	0.09	4.6	0.866	0.03	-78.52	0.0944	Myof	myoferlin (Myof), transcript variant X2, mRNA
XM_037197744.1	2721	0.39	-4.52	0.911	0.54	214.19	0.0946	Fzd6	frizzled class receptor 6 (Fzd6), transcript variant X2, mRNA
XM_028872948.2	1209	1.62	-1.29	1	41.36	-2.66	0.0946	Socs1	suppressor of cytokine signaling 1 (Socs1), mRNA
XM_037200512.1	2668	0.1	1.66	1	0.14	-28.36	0.0949	Dse	dermatan sulfate epimerase (Dse), transcript variant X5, mRNA
XM_028888859.2	1957	0.06	1.24	1	0.65	12.95	0.095	LOC114706456	cytochrome P450 2C44 (LOC114706456), transcript variant X1, mRNA
XM_028890530.2	1461	0.13	1.37	1	0.13	-71.72	0.095	Dusp14	dual specificity phosphatase 14 (Dusp14), transcript variant X3, mRNA
XM_028886318.2	3250	0.02	-1.87	1	0.06	-66.69	0.0952	Sec22a	SEC22 homolog A, vesicle trafficking protein (Sec22a), transcript variant X1, mRNA
XM_028891122.2	1186	1.39	-1.04	1	0.4	97.32	0.0952	Sfxn3	sideroflexin 3 (Sfxn3), transcript variant X4, mRNA
XM_037206483.1	1099	0.57	1.13	1	0.68	-12.93	0.0952	LOC114695699	elongation factor 1-alpha 1-like (LOC114695699), mRNA
XM_028879459.2	4608	0.01	1.69	NaN	0.09	-19.8	0.0952	Nkapl	NFKB activating protein like (Nkapl), mRNA
XM_037202591.1	4661	0	NaN	NaN	0.25	40.25	0.0952	Coro2a	coronin 2A (Coro2a), transcript variant X2, mRNA
XM_037207420.1	2341	0.52	3.12	0.815	0.36	153.24	0.0952	Map2k5	mitogen-activated protein kinase kinase 5 (Map2k5), transcript variant X2, mRNA
XM_028873103.2	8363	0.45	1.31	1	2.5	-4.77	0.0952	Arhgap42	Rho GTPase activating protein 42 (Arhgap42), mRNA
XM_028891443.2	7515	0.06	-1.25	1	0.24	215.26	0.0952	Agrn	agrin (Agrn), transcript variant X3, mRNA
XM_028889766.2	1901	6.92	1.04	1	18.5	-2.62	0.0952	Srsf2	serine and arginine rich splicing factor 2 (Srsf2), transcript variant X1, mRNA
XR_003736489.2	4103	0.25	2.09	1	0.14	118.6	0.0952	Syngap1	synaptic Ras GTPase activating protein 1 (Syngap1), transcript variant X6, misc_RNA
XM_028866428.2	3564	3.03	-1953.04	0.00138	0.5	-81.96	0.0953	Il10ra	interleukin 10 receptor subunit alpha (Il10ra), transcript variant X2, mRNA
XM_028856480.2	1300	0.75	1.6	1	0.43	-26.57	0.0953	Atpaf2	ATP synthase mitochondrial F1 complex assembly factor 2 (Atpaf2), transcript variant X2, mRNA
XM_028877307.2	4594	0.1	-1.93	1	0.03	-71.02	0.0955	Vangl1	VANGL planar cell polarity protein 1 (Vangl1), transcript variant X1, mRNA
XM_028892846.2	1306	18.8	-1.05	1	8.08	4.32	0.0955	Ctsw	cathepsin W (Ctsw), mRNA
XM_028857391.2	3587	0.47	-1.14	1	0.42	205.96	0.0956	Pip5k1a	phosphatidylinositol-4-phosphate 5-kinase type 1 alpha (Pip5k1a), transcript variant X1, mRNA
XM_028893838.2	2147	0.61	1.2	1	3.87	-9.84	0.0956	Cadm4	cell adhesion molecule 4 (Cadm4), mRNA
XM_028875736.1	3200	0.24	1.07	1	0.16	122.88	0.0958	Hsdl1	hydroxysteroid dehydrogenase like 1 (Hsdl1), transcript variant X2, mRNA
XM_028881190.2	2847	22.37	1.09	1	15.98	2.36	0.0958	Dusp6	dual specificity phosphatase 6 (Dusp6), transcript variant X1, mRNA
XM_028880440.2	9325	0.01	-4.59	NaN	0.08	50.62	0.0958	LOC114700741	cat eye syndrome critical region protein 2 homolog (LOC114700741), transcript variant X1, mRNA
XM_037201163.1	522	14.22	-2.24	0.381	159.3	-4.16	0.0958	Havcr1	hepatitis A virus cellular receptor 1 homolog (LOC114689864), mRNA
XM_028877924.2	4327	0.35	-1.6	1	0.06	-78.98	0.0959	Ttc21b	tetratricopeptide repeat domain 21B (Ttc21b), transcript variant X2, mRNA
XM_037206241.1	1100	1.3	-5.06	0.23	1.69	10.6	0.096	Dnajb13	DnaJ heat shock protein family (Hsp40) member B13 (Dnajb13), mRNA
XM_028879071.2	4098	4.55	1.42	0.837	8.01	2.58	0.096	Ets1	ETS proto-oncogene 1, transcription factor (Ets1), transcript variant X1, mRNA
XM_037197382.1	2232	0.08	-3.99	0.852	0.26	109.04	0.0961	LOC114708569	trophinin associated protein (LOC114708569), transcript variant X4, mRNA
XM_028857059.2	2837	0.04	-1.57	NaN	0.75	-24.29	0.0961	Pid1	phosphotyrosine interaction domain containing 1 (Pid1), transcript variant X3, mRNA
XM_037206994.1	1426	0.1	-39.94	0.233	0.12	-18.94	0.0962	LOC114699990	glutathione S-transferase Mu 7 (LOC114699990), transcript variant X3, mRNA
XM_037210970.1	4437	0.24	-2.28	1	0.13	108.59	0.0963	Hdac9	histone deacetylase 9 (Hdac9), transcript variant X20, mRNA
XM_028869094.2	2339	1.49	-1.12	1	3.64	-3.85	0.0965	LOC114692961	elongin BC and polycomb repressive complex 2 associated protein (LOC114692961), mRNA
XM_037211315.1	3966	0.28	-1.17	1	0.31	14.95	0.0966	C15H1orf112	chromosome 15 C1orf112 homolog (C15H1orf112), transcript variant X5, mRNA
XM_037211161.1	2401	0.11	-62.63	0.144	0.04	-79.38	0.0969	Taf1a	TATA-box binding protein associated factor, RNA polymerase I subunit A (Taf1a), transcript variant X9, mRNA
XM_028877770.2	2167	0.32	1.98	1	0.36	-19.63	0.0969	Cep89	centrosomal protein 89 (Cep89), transcript variant X4, mRNA
XM_028887841.2	6062	0	NaN	NaN	0.04	-75.87	0.0971	Nrp1	neuropilin 1 (Nrp1), transcript variant X5, mRNA
XM_028895310.2	2931	0.1	-77.19	0.118	0.07	-79.61	0.0973	Sema3b	semaphorin 3B (Sema3b), transcript variant X4, mRNA
XM_028857232.2	1544	34.19	-1.09	1	21.2	3.3	0.0974	Tcf7	transcription factor 7 (Tcf7), transcript variant X2, mRNA
XM_028870523.2	1590	0.19	-1.83	1	0.26	93.8	0.0975	Pter	phosphotriesterase related (Pter), transcript variant X3, mRNA
XM_028866535.2	1016	0.28	1.61	1	0.27	-78.24	0.0976	Rbpms2	RNA binding protein, mRNA processing factor 2 (Rbpms2), transcript variant X2, mRNA
XM_028865116.2	5611	0.34	2.13	1	0.15	114.63	0.0977	Myo5a	myosin VA (Myo5a), transcript variant X6, mRNA
XM_028868622.2	1330	2.31	-1.06	1	0.32	21.9	0.0977	Semg1	semenogelin 1 (Semg1), mRNA
XM_028869477.2	1777	0.9	1.1	1	1.5	-6.64	0.0977	Plscr3	phospholipid scramblase 3 (Plscr3), transcript variant X3, mRNA
XM_028871478.2	495	5.03	-1.26	1	581.07	-4	0.0977	Mt1	metallothionein-1 (LOC114694510), mRNA
XM_028876600.2	3657	0.29	2.99	1	0.12	-21.06	0.0977	Prelp	proline and arginine rich end leucine rich repeat protein (LOC114698098), transcript variant X1, mRNA
XM_037196733.1	587	322270	1.13	1	325140	-3.02	0.0977	LOC114706607	hemoglobin subunit beta (LOC114706607), mRNA
XM_037203578.1	1058	0.35	-1.35	1	0.34	-23.29	0.0977	LOC119087584	actin cytoskeleton-regulatory complex protein PAN1-like (LOC119087584), transcript variant X3, mRNA
XM_037204808.1	8003	0.05	1.1	1	0.03	-75.3	0.0977	Baz2b	bromodomain adjacent to zinc finger domain 2B (Baz2b), transcript variant X6, mRNA
XM_037210299.1	789	0.28	-1.81	1	0.17	-77.42	0.0978	Mreg	melanoregulin (Mreg), transcript variant X2, mRNA
XM_028892142.2	3143	0.84	1.58	1	0.96	9.17	0.0981	Khnyn	KH and NYN domain containing (Khnyn), transcript variant X3, mRNA
XM_028869211.2	1315	0.2	1.05	1	0.48	113.08	0.0985	Chkb	choline kinase beta (Chkb), transcript variant X8, mRNA
XM_028877769.2	2407	0.23	-165.59	0.0398	0.17	-27.12	0.0987	Cep89	centrosomal protein 89 (Cep89), transcript variant X3, mRNA
XM_028860222.2	2105	49.69	1.27	0.924	50.23	3.23	0.099	Cd8a	CD8a molecule (Cd8a), mRNA
XM_037196961.1	2622	0.56	1.19	1	0.41	23.95	0.099	Osbpl1a	oxysterol binding protein like 1A (Osbpl1a), transcript variant X7, mRNA
XM_028885159.2	4311	0.23	1.12	1	0.15	112.48	0.0994	Zfp431	zinc finger protein 431-like (LOC114704108), transcript variant X2, mRNA
XM_028864998.2	7499	1.4	1.47	1	0.1	113.32	0.0995	Tmod2	tropomodulin 2 (Tmod2), transcript variant X1, mRNA
XM_037202047.1	3876	0.19	-2.41	1	0.38	145.71	0.0995	Zc3h4	zinc finger CCCH-type containing 4 (Zc3h4), transcript variant X4, mRNA
XM_028895263.2	10845	10.9	1.59	0.112	3.03	2.67	0.0997	Gprin3	GPRIN family member 3 (Gprin3), mRNA
XM_037203924.1	6225	0.08	8.43	0.604	0.08	116.74	0.0997	C3H3orf20	chromosome 3 C3orf20 homolog (C3H3orf20), transcript variant X5, mRNA
XM_028875834.2	2679	1.55	-2.05	1	4.09	-6.29	0.0997	Lyve1	lymphatic vessel endothelial hyaluronan receptor 1 (Lyve1), mRNA
XM_037211437.1	2068	0.5	-66.18	0.0262	0.43	160.61	0.0998	Eif2d	eukaryotic translation initiation factor 2D (Eif2d), transcript variant X1, mRNA
XM_037203733.1	1249	0.97	-338.48	0.0306	0.21	-30.17	0.0998	Prkag2	protein kinase AMP-activated non-catalytic subunit gamma 2 (Prkag2), transcript variant X14, mRNA
XM_028861479.2	7946	1.4	-1.43	1	2.69	7.61	0.1	Hivep2	HIVEP zinc finger 2 (Hivep2), transcript variant X8, mRNA
XM_028879198.2	2744	3.54	-1.21	1	242.52	3.42	0.1	Olfm4	olfactomedin 4 (Olfm4), mRNA
XM_028881666.2	3277	0.44	-2.91	1	0.19	98.53	0.1	Klhl15	kelch like family member 15 (Klhl15), transcript variant X3, mRNA
XM_037200194.1	6251	0.15	1.11	1	0.11	104.94	0.1	Col11a2	collagen type XI alpha 2 chain (Col11a2), transcript variant X4, mRNA
XM_028883600.2	694	0.13	1.07	1	0.1	-27.99	0.1	LOC114702977	SLX4 interacting protein (LOC114702977), transcript variant X3, mRNA
XM_037210087.1	1948	0.03	20.53	NaN	0.18	-18.98	0.1	Ugt1a6a	UDP-glucuronosyltransferase 1-6 (LOC114697897), transcript variant X8, mRNA
XM_028853893.1	3332	4.31	1.66	0.732	2.63	5.33	0.1	Znf598	zinc finger protein 598, E3 ubiquitin ligase (Znf598), transcript variant X1, mRNA
XM_037199902.1	4362	0.38	1.12	1	0.12	115.75	0.1	Kat2b	lysine acetyltransferase 2B (Kat2b), transcript variant X3, mRNA
XM_037208385.1	3604	281.83	-1.17	1	759.83	2.59	0.1	Lcp1	lymphocyte cytosolic protein 1 (Lcp1), transcript variant X2, mRNA
XM_037210569.1	3450	0.16	167.43	0.0481	0.2	23.69	0.1	Klhl28	kelch like family member 28 (Klhl28), transcript variant X3, mRNA
XM_028879381.2	6568	8.53	-1.6	0.139	16.04	2.65	0.1	Sort1	sortilin 1 (Sort1), transcript variant X3, mRNA
XR_005092691.1	830	0.24	-6.76	0.625	0.33	-76.63	0.1	LOC119088928	uncharacterized LOC119088928 (LOC119088928), transcript variant X2, ncRNA
XM_028855571.2	2834	0.52	1.61	1	0.52	38.49	0.1	Tgif2	TGFB induced factor homeobox 2 (Tgif2), transcript variant X1, mRNA
XM_028888427.2	1885	2.33	-1.21	1	8.07	-2.66	0.1	Cdkn1a	cyclin dependent kinase inhibitor 1A (Cdkn1a), mRNA
XM_028869102.2	2458	0.01	4.54	NaN	0.18	-28.52	0.1	Pcgf2	polycomb group ring finger 2 (Pcgf2), transcript variant X4, mRNA
XM_028869438.2	6749	0.87	1.59	1	6.26	3.42	0.101	Kdm6b	lysine demethylase 6B (Kdm6b), transcript variant X3, mRNA
XM_037205591.1	431	210.28	-1.06	1	115.33	-2.47	0.101	LOC114681874	60S acidic ribosomal protein P2-like (LOC114681874), mRNA
XM_028873525.1	1497	48.61	-1.7	0.0611	19.22	-3.38	0.101	Rnase4	ribonuclease A family member 4 (Rnase4), transcript variant X1, mRNA
XM_028883398.2	1481	0.4	3.31	0.892	0.31	84.9	0.101	LOC114702818	lactosylceramide 4-alpha-galactosyltransferase-like (LOC114702818), mRNA
XM_028882874.2	4603	0.06	-27.95	0.181	0.05	-73.01	0.101	Hectd2	HECT domain E3 ubiquitin protein ligase 2 (Hectd2), transcript variant X3, mRNA
XM_037200154.1	11300	0.05	-4.93	0.917	0.05	116.48	0.101	Tnxb	tenascin XB (Tnxb), transcript variant X13, mRNA
XM_037201383.1	3254	0.38	-262.68	0.0345	0.32	38.72	0.101	Sgcd	sarcoglycan delta (Sgcd), transcript variant X5, mRNA
XM_037206429.1	2374	0.4	293.62	0.0262	0.35	151.35	0.101	Ube2w	ubiquitin conjugating enzyme E2 W (Ube2w), transcript variant X2, mRNA
XM_037199227.1	1707	0.48	6.29	0.741	0.33	104.08	0.101	LOC114710482	T-complex protein 1 subunit zeta-like (LOC114710482), mRNA
XM_028862832.2	3254	5.17	1.42	0.95	16.56	3.07	0.101	Adgre5	adhesion G protein-coupled receptor E5 (Adgre5), transcript variant X1, mRNA
XM_037198880.1	2309	0.54	-1.04	1	0.15	-37.43	0.101	Septin6	septin 6 (Septin6), transcript variant X3, mRNA
XM_037209475.1	5115	8.72	-1.29	0.814	14.46	2.53	0.101	Naip2	baculoviral IAP repeat-containing protein 1b-like (LOC114694682), transcript variant X3, mRNA
XM_037200865.1	2044	0.2	1.19	1	0.11	-74.24	0.101	P2rx5	purinergic receptor P2X 5 (P2rx5), transcript variant X1, mRNA
XM_028857669.2	1860	15.52	-1.04	1	7.94	3.85	0.101	Sh2d2a	SH2 domain containing 2A (Sh2d2a), mRNA
XM_028882407.2	3342	0.21	168.01	0.0599	0.21	110.84	0.102	Ccdc66	coiled-coil domain containing 66 (Ccdc66), transcript variant X3, mRNA
XM_028874397.2	3175	1.27	1.93	1	0.33	21.27	0.102	Pde1b	phosphodiesterase 1B (Pde1b), transcript variant X2, mRNA
XM_028891446.2	7470	12.57	1.18	1	9.72	2.16	0.102	Agrn	agrin (Agrn), transcript variant X6, mRNA
XM_037202567.1	2264	0.13	-15.48	0.266	0.19	-20.61	0.102	Melk	maternal embryonic leucine zipper kinase (Melk), transcript variant X3, mRNA
XM_028855056.2	2987	0.93	2.4	0.96	0.45	28.45	0.102	Thegl	theg spermatid protein like (Thegl), transcript variant X1, mRNA
XM_037209126.1	3368	0.28	-5.63	0.668	0.17	111.21	0.102	Pidd1	p53-induced death domain protein 1 (Pidd1), transcript variant X4, mRNA
XM_028890571.2	4297	1.56	-1.06	1	0.68	17.81	0.102	Synrg	synergin gamma (Synrg), transcript variant X6, mRNA
XM_028880960.2	7117	0.64	-1.8	1	0.07	114.38	0.102	Ablim1	actin binding LIM protein 1 (Ablim1), transcript variant X8, mRNA
XM_028855235.2	3365	0.37	-1.44	1	0.21	109.29	0.103	Clip3	CAP-Gly domain containing linker protein 3 (Clip3), transcript variant X1, mRNA
XM_037205905.1	3045	0.39	-298.26	0.0277	0.34	157.24	0.103	Znf184	zinc finger protein 184 (Znf184), transcript variant X2, mRNA
XM_037209332.1	2442	1.3	-1.58	1	0.26	115.99	0.103	Sigirr	single Ig and TIR domain containing (Sigirr), transcript variant X4, mRNA
XM_037207593.1	2835	0.71	-3.34	0.924	12.26	4.01	0.103	Gramd1b	GRAM domain containing 1B (Gramd1b), transcript variant X11, mRNA
XR_005091879.1	5733	0.05	1.08	1	0.09	100.22	0.103	LOC119088248	uncharacterized LOC119088248 (LOC119088248), transcript variant X2, ncRNA
XM_028879303.2	561	0.18	-1.9	1	1.1	-12.59	0.103	LOC114699929	40S ribosomal protein S11-like (LOC114699929), mRNA
XM_028861509.2	6635	0.22	-466.71	0.0111	0.06	-26.21	0.104	Adgrg6	adhesion G protein-coupled receptor G6 (Adgrg6), transcript variant X1, mRNA
XM_028856846.2	2670	3.64	-1.14	1	17.51	-2.93	0.104	Vat1	vesicle amine transport 1 (Vat1), mRNA
XM_028861453.2	2314	0.27	2.49	1	0.2	116.17	0.104	Mto1	mitochondrial tRNA translation optimization 1 (Mto1), transcript variant X2, mRNA
XM_037210182.1	5608	0.51	1.47	1	0.52	-6	0.104	Ptprm	protein tyrosine phosphatase receptor type M (Ptprm), mRNA
XM_028883087.2	1511	29.25	-1.52	0.413	19.98	-2.25	0.104	Acot7	acyl-CoA thioesterase 7 (Acot7), transcript variant X1, mRNA
XM_028890528.2	1482	0.33	1.06	1	0.57	143.5	0.104	Dusp14	dual specificity phosphatase 14 (Dusp14), transcript variant X1, mRNA
XM_028874557.2	3794	0.04	18.58	0.612	0.15	108.04	0.105	Pou6f1	POU class 6 homeobox 1 (Pou6f1), transcript variant X2, mRNA
XM_028870293.2	1807	0.57	-1.38	1	0.45	164.63	0.105	Slc25a22	solute carrier family 25 member 22 (Slc25a22), transcript variant X6, mRNA
XM_037211637.1	6740	0.95	2	0.725	1.3	-3.9	0.105	Ank1	ankyrin 1 (Ank1), transcript variant X10, mRNA
XM_028879848.2	8655	0.4	1.58	1	0.15	39.25	0.105	Senp6	SUMO specific peptidase 6 (Senp6), transcript variant X4, mRNA
XM_037210710.1	2754	0.16	27.38	0.154	0.25	141.91	0.105	Znf410	zinc finger protein 410 (Znf410), transcript variant X4, mRNA
XM_037204686.1	4570	0.15	1.53	1	0.04	-74.9	0.105	Mamdc4	MAM domain containing 4 (Mamdc4), transcript variant X3, mRNA
XM_037201339.1	2060	2.03	-1.59	1	1.4	-7.77	0.105	LOC114700428	fatty acid hydroxylase domain-containing protein 2-like (LOC114700428), transcript variant X1, mRNA
XM_037211671.1	4139	0.46	-1.45	1	0.1	-112.92	0.105	Erlin2	ER lipid raft associated 2 (Erlin2), transcript variant X4, mRNA
XM_028861651.2	1868	49.31	-1.44	0.321	73	2.24	0.106	LOC114686954	CMRF35-like molecule 8 (LOC114686954), transcript variant X1, mRNA
XR_005091992.1	899	13.71	-1.24	1	56.63	2.44	0.106	C7H19orf38	chromosome 7 C19orf38 homolog (C7H19orf38), transcript variant X4, misc_RNA
XM_037208447.1	1355	0.05	-3.24	NaN	0.08	-74.35	0.106	Pbk	PDZ binding kinase (Pbk), transcript variant X3, mRNA
XM_028881678.2	4939	4.38	-1.05	1	4.15	-2.91	0.106	Pcyt1b	phosphate cytidylyltransferase 1, choline, beta (Pcyt1b), transcript variant X2, mRNA
XM_028882397.2	5104	0	4.25	NaN	0.08	85.6	0.106	Wnt5a	Wnt family member 5A (Wnt5a), transcript variant X1, mRNA
XR_005090548.1	2394	20.41	-1.35	0.732	14.47	2.9	0.106	LOC119087106	uncharacterized LOC119087106 (LOC119087106), ncRNA
XM_037203878.1	10343	0.14	-1.55	1	0.04	-47.1	0.106	Aak1	AP2 associated kinase 1 (Aak1), transcript variant X2, mRNA
XM_037206488.1	4430	0	-1.16	NaN	0.04	-59.96	0.106	Slc16a12	solute carrier family 16 member 12 (Slc16a12), transcript variant X2, mRNA
XM_037202923.1	3229	37.26	1.02	1	217.18	3	0.106	Csf3r	colony stimulating factor 3 receptor (Csf3r), transcript variant X1, mRNA
XM_037207016.1	2888	0.17	1.46	1	0.27	109.77	0.106	Hps1	HPS1 biogenesis of lysosomal organelles complex 3 subunit 1 (Hps1), transcript variant X1, mRNA
XM_028854545.2	4744	7.45	-1.01	1	10.71	2.24	0.106	Unkl	unk like zinc finger (Unkl), mRNA
XM_028881438.2	5027	0.68	1.25	1	1.82	-3.58	0.106	Slc22a23	solute carrier family 22 member 23 (Slc22a23), mRNA
XR_005092157.1	3404	2.09	1.05	1	2.63	-4.47	0.106	LOC114702713	syncytin-B (LOC114702713), transcript variant X4, misc_RNA
XM_028858393.2	6317	6.58	-1.22	0.964	9.51	2.2	0.107	Abcc1	ATP binding cassette subfamily C member 1 (Abcc1), transcript variant X1, mRNA
XM_028889924.2	3106	8.71	1.28	0.93	21.4	-2.48	0.107	Slc16a1	solute carrier family 16 member 1 (Slc16a1), mRNA
XM_028885448.2	3226	77.49	-1.13	1	406.26	2.79	0.107	Csf3r	colony stimulating factor 3 receptor (Csf3r), transcript variant X4, mRNA
XM_028862547.2	1561	25.25	1.45	0.914	16.48	3.47	0.108	LOC114687927	natural cytotoxicity triggering receptor 1 (LOC114687927), mRNA
XM_037197329.1	2703	0.21	-1.04	1	0.2	105.06	0.108	Rarg	retinoic acid receptor gamma (Rarg), transcript variant X3, mRNA
XM_028864047.1	5689	0.13	26.45	0.0596	0.09	-23.49	0.108	Cxcl12	C-X-C motif chemokine ligand 12 (Cxcl12), transcript variant X1, mRNA
XM_028854986.2	8232	0.07	-1.09	1	0.11	23.7	0.108	Nr2c2	nuclear receptor subfamily 2 group C member 2 (Nr2c2), transcript variant X4, mRNA
XM_028873054.2	6646	3.68	1.16	1	14.66	2.58	0.108	Osbpl8	oxysterol binding protein like 8 (Osbpl8), transcript variant X10, mRNA
XM_028885906.2	1821	0.15	-2.65	1	0.35	103.96	0.108	Rad9b	RAD9 checkpoint clamp component B (Rad9b), transcript variant X1, mRNA
XM_037196722.1	10872	0.11	1.29	1	0.14	10.5	0.108	Slc16a7	solute carrier family 16 member 7 (Slc16a7), transcript variant X9, mRNA
XM_028854218.2	751	18	-1.29	1	25.43	-2.65	0.109	Ranbp1	RAN binding protein 1 (Ranbp1), transcript variant X2, mRNA
XM_028893479.2	1042	23.23	1	1	24.42	-2.45	0.109	Sin3b	SIN3 transcription regulator family member B (Sin3b), transcript variant X2, mRNA
XM_037210149.1	1907	0.23	2.88	1	0.53	27.35	0.109	Thap4	THAP domain containing 4 (Thap4), transcript variant X2, mRNA
XM_037206686.1	5013	7.78	-1.57	1	25.17	2.5	0.109	Tlr2	toll like receptor 2 (Tlr2), transcript variant X2, mRNA
XR_005089742.1	14048	0.41	3.58	0.238	0.41	4.98	0.109	Birc6	baculoviral IAP repeat containing 6 (Birc6), transcript variant X12, misc_RNA
XM_028860501.2	1652	69.98	1.58	0.155	75.23	-2.37	0.109	Ybx3	Y-box binding protein 3 (Ybx3), transcript variant X2, mRNA
XM_028873225.2	3500	2.81	1.51	0.951	5.88	-5.93	0.109	Rps6ka3	ribosomal protein S6 kinase A3 (Rps6ka3), transcript variant X3, mRNA
XM_028865505.2	5396	1.47	1.38	1	1.15	4.98	0.109	Zbtb18	zinc finger and BTB domain containing 18 (Zbtb18), transcript variant X4, mRNA
XM_037206046.1	1981	0.68	6.18	0.511	0.34	-14.49	0.109	Zdhhc6	zinc finger DHHC-type palmitoyltransferase 6 (Zdhhc6), transcript variant X3, mRNA
XM_028890418.2	2272	0.11	10.88	0.218	0.07	-15.49	0.11	Hey1	hes related family bHLH transcription factor with YRPW motif 1 (Hey1), mRNA
XM_028879111.2	5507	4.08	1.14	1	8.85	2.62	0.11	Ppip5k2	diphosphoinositol pentakisphosphate kinase 2 (Ppip5k2), transcript variant X18, mRNA
XM_028865656.2	2325	0.38	1.83	1	0.41	154.73	0.11	Lman2l	lectin, mannose binding 2 like (Lman2l), transcript variant X1, mRNA
XM_028892453.2	9966	0.06	1.87	1	0.09	26.94	0.11	LOC114708897	E3 SUMO-protein ligase RanBP2 (LOC114708897), transcript variant X1, mRNA
XM_037200503.1	1226	0.83	1.08	1	3.78	-5.59	0.11	LOC119086891	retinoic acid early-inducible protein 1-epsilon-like (LOC119086891), mRNA
XM_028888786.2	3318	23	1.12	1	27.87	2.3	0.11	LOC114706397	uncharacterized LOC114706397 (LOC114706397), transcript variant X2, mRNA
XM_037203304.1	3161	0.22	-64.15	0.0327	0.31	168.3	0.11	Ttll10	tubulin tyrosine ligase like 10 (Ttll10), transcript variant X1, mRNA
XM_028861570.2	2492	34.08	-1.62	0.197	62.96	2.23	0.11	Trim34a	tripartite motif-containing protein 34A-like (LOC114686901), mRNA
XM_028860629.2	1991	0.13	-3.79	0.969	0.25	26.91	0.11	Clcf1	cardiotrophin like cytokine factor 1 (Clcf1), transcript variant X1, mRNA
XM_028878333.2	868	0.37	6.14	0.393	0.19	-19.19	0.11	Sncg	synuclein gamma (Sncg), mRNA
XM_028891564.2	2905	0.96	1.55	1	0.89	8.99	0.11	Gata3	GATA binding protein 3 (Gata3), transcript variant X2, mRNA
XM_028892340.2	1598	25.93	1.11	1	17.14	3.16	0.11	Cd27	CD27 molecule (Cd27), transcript variant X2, mRNA
XM_037206231.1	4944	3.73	1.04	1	2.71	-3.52	0.111	Ranbp10	RAN binding protein 10 (Ranbp10), transcript variant X4, mRNA
XM_037199031.1	2131	0.25	180.17	0.0372	0.5	14.78	0.111	LOC114685845	nuclear RNA export factor 2-like (LOC114685845), transcript variant X2, mRNA
XM_037197684.1	5938	0.13	-139.29	0.0981	0.09	95.79	0.111	Tnrc6b	trinucleotide repeat containing adaptor 6B (Tnrc6b), transcript variant X2, mRNA
XM_037205414.1	3489	0.43	2.23	0.935	0.14	92.86	0.111	Lpin3	lipin 3 (Lpin3), transcript variant X2, mRNA
XM_037208639.1	8901	0.26	2.31	1	0.09	149.11	0.111	Flnb	filamin B (Flnb), transcript variant X4, mRNA
XM_037210542.1	3773	0.2	-1.98	1	0.1	-93.01	0.111	G2e3	G2/M-phase specific E3 ubiquitin protein ligase (G2e3), transcript variant X4, mRNA
XM_028874507.1	1781	1.77	-1.84	1	4.51	-6.16	0.111	Krt8	keratin 8 (Krt8), mRNA
XM_028893358.2	2177	0.99	-1.35	1	2.41	7.82	0.111	Pgap6	post-glycosylphosphatidylinositol attachment to proteins 6 (Pgap6), transcript variant X2, mRNA
XM_028864043.2	2020	0.3	-1	1	5.08	-5.15	0.112	Rassf4	Ras association domain family member 4 (Rassf4), transcript variant X1, mRNA
XM_028864019.2	3800	0.35	389.68	0.0284	0.21	149.82	0.112	Tmcc1	transmembrane and coiled-coil domain family 1 (Tmcc1), transcript variant X5, mRNA
XM_037211098.1	2597	1.57	1.56	1	0.37	178.3	0.112	Cast	calpastatin (Cast), transcript variant X8, mRNA
XM_037201038.1	2843	0.04	-3.64	NaN	0.08	-66.38	0.112	Ccdc57	coiled-coil domain containing 57 (Ccdc57), transcript variant X2, mRNA
XR_005090803.1	6030	0.09	5.48	0.863	0.11	31.52	0.113	LOC114684038	RB1-inducible coiled-coil protein 1 (LOC114684038), transcript variant X4, misc_RNA
XM_028871639.2	5568	8.82	1.09	1	9.56	2.1	0.113	Kmt5b	lysine methyltransferase 5B (Kmt5b), transcript variant X2, mRNA
XM_028871752.2	4330	0.01	-13.46	NaN	0.01	-63.66	0.113	Cttnbp2	cortactin binding protein 2 (Cttnbp2), transcript variant X6, mRNA
XM_028884421.2	6788	0.23	-1.2	1	1.5	-7.08	0.113	Npr3	natriuretic peptide receptor 3 (Npr3), transcript variant X2, mRNA
XM_028868207.2	1688	0.22	2.54	0.989	0.24	85.28	0.113	Gpr180	G protein-coupled receptor 180 (Gpr180), transcript variant X2, mRNA
XM_037205544.1	2517	1.95	-1.4	1	0.99	8.77	0.113	Elmo2	engulfment and cell motility 2 (Elmo2), transcript variant X2, mRNA
XM_028888084.1	5733	1.25	1.54	1	4.03	-3.24	0.113	Spred1	sprouty related EVH1 domain containing 1 (Spred1), mRNA
XR_005091599.1	2483	0.44	293.78	0.0382	0.46	11.96	0.113	Znf322	zinc finger protein 322 (Znf322), transcript variant X10, misc_RNA
XM_037208043.1	2275	1.47	-1.84	1	0.35	17.45	0.113	Cx3cr1	C-X3-C motif chemokine receptor 1 (Cx3cr1), transcript variant X2, mRNA
XM_037201873.1	1509	0.17	-2.07	1	0.06	-61.98	0.113	LOC119087189	disks large homolog 5-like (LOC119087189), transcript variant X2, mRNA
XM_028888888.2	2300	10.36	1.27	1	17.99	2.41	0.113	Clec4a4	C-type lectin domain family 4 member A-like (LOC114706495), transcript variant X1, mRNA
XM_037203190.1	9797	0.05	-105.41	0.123	0.08	177.07	0.114	Kif1b	kinesin family member 1B (Kif1b), transcript variant X11, mRNA
XM_028864624.2	2737	0.05	50.39	0.193	0.07	-22.59	0.114	Stau2	staufen double-stranded RNA binding protein 2 (Stau2), transcript variant X3, mRNA
XM_028867780.2	4113	0.05	-1.69	1	0.03	-16.51	0.114	LOC114692131	N-acetyllactosaminide beta-1,6-N-acetylglucosaminyl-transferase-like (LOC114692131), mRNA
XM_028873722.2	2043	0.22	-40.75	0.104	0.17	88.63	0.114	Rhcg	Rh family C glycoprotein (Rhcg), transcript variant X1, mRNA
XM_037201372.1	2897	0.29	-7.28	0.413	0.19	100.32	0.114	Ggnbp2	gametogenetin binding protein 2 (Ggnbp2), transcript variant X4, mRNA
XM_037209093.1	1236	0.72	3.17	0.985	0.58	15.8	0.114	Tspan4	tetraspanin 4 (Tspan4), transcript variant X5, mRNA
XM_028859450.2	2574	0.31	2.08	1	0.14	81.03	0.114	LOC114684907	zinc finger protein 431-like (LOC114684907), transcript variant X1, mRNA
XM_037211448.1	7198	0.48	-1.07	1	0.13	-24.08	0.114	Pfkfb2	6-phosphofructo-2-kinase/fructose-2,6-biphosphatase 2 (Pfkfb2), transcript variant X10, mRNA
XM_037203820.1	2504	0.07	6.79	0.347	0.04	-24.99	0.114	Sh2d6	SH2 domain containing 6 (Sh2d6), transcript variant X2, mRNA
XR_005092344.1	3423	2.48	-1.89	0.706	0.93	-5.55	0.114	LOC119088654	uncharacterized LOC119088654 (LOC119088654), ncRNA
XM_037205987.1	4220	0.23	-2.09	1	0.2	149.68	0.115	Mllt10	MLLT10 histone lysine methyltransferase DOT1L cofactor (Mllt10), transcript variant X9, mRNA
XM_028854188.2	1097	0.48	1.04	1	0.34	91.53	0.115	LOC114681003	catechol O-methyltransferase-like (LOC114681003), transcript variant X2, mRNA
XM_037201145.1	5167	0.27	-1.43	1	0.08	89.55	0.115	Mbtd1	mbt domain containing 1 (Mbtd1), transcript variant X3, mRNA
XM_028855978.2	7192	0.06	1.13	1	0.09	97.74	0.115	Zfyve16	zinc finger FYVE-type containing 16 (Zfyve16), transcript variant X3, mRNA
XM_028880488.2	8427	0.08	1.11	1	0.03	-66.29	0.115	Erc1	ELKS/RAB6-interacting/CAST family member 1 (Erc1), transcript variant X6, mRNA
XM_028853586.2	1887	0.05	33.94	NaN	0.11	-14.67	0.115	Pcyt2	phosphate cytidylyltransferase 2, ethanolamine (Pcyt2), transcript variant X4, mRNA
XM_028874940.2	4414	0.08	21.75	0.196	0.09	88.57	0.115	Zranb3	zinc finger RANBP2-type containing 3 (Zranb3), transcript variant X2, mRNA
[truncated: 52,468 more rows]
