# Supplementary material for: The infection-tolerant white-footed deermouse tempers interferon responses to endotoxin in comparison to the mouse and rat
Source: eLife. 2024 Jan 9;12:RP90135. doi: 10.7554/eLife.90135 (PMC10945503; doi:10.7554/eLife.90135)
Supplement: Figure 4—source data 2. [file elife-90135-fig4-data2.xlsx]

## Sheet: Figure 4-Source Data 3
Figure 4-Source Data 2. Comparison of female (fem) and male P. leucopus for mean fold-changes of LPS-treated to control animals for each of 5012 reference transcripts with a maximum TPM ≥10
transcript	length	gene	fem_max	fem_log2 FC	fem_FDR	male_max	male_log2 FC	male_FDR
XM_037199286.1	504	Saa3	3372.37	13.94	1.51e-154	1080.35	12.51	2.85e-90
XM_028868627.2	910	Slpi	1888	10.34	5.58e-139	590.01	7.91	3.74e-33
XM_028860282.2	588	Saa3	3616.88	15.02	4.43e-121	1478.48	14.08	2.31e-92
XM_028889615.2	1825	Sphk1	67.44	6.82	1.87e-107	34.74	4.9	1.13e-17
XM_028867455.2	1924	Ibsp	274.14	12.56	8.06e-101	200.01	10.64	5.92e-34
XM_028865841.2	1517	Il1r2	476.48	6.98	2.83e-83	183.54	4.26	8.24e-10
XM_028863845.2	4407	Slc28a3	66.99	7.46	6.85e-80	28.05	3.41	1.09e-06
XM_028860285.2	675	Saa5	384.04	12.17	3.9e-79	160.24	12.95	5.19e-47
XM_037204891.1	1529	Cblif	1025.42	7.96	2.96e-78	533.57	5.02	5.02e-14
XM_028859810.2	1692	Fpr1	173.17	5.86	7.52e-78	166.47	5.65	1.62e-22
XM_028890975.2	2429	Mmp8	1376.59	8.53	5.23e-75	795	7.23	1.06e-23
XM_028859812.2	1765	Fpr2	271.56	6.27	2.55e-73	215.83	5.91	4.2e-31
XM_037208345.1	2864	Acod1	144.71	6.85	7.27e-73	102.77	7.15	6.09e-39
XM_028884807.2	1132	Lcn2	3004.11	8.56	4.14e-69	1915.64	7.61	1.41e-29
XM_028859809.2	1556	Fpr1	91.19	6.12	2.42e-66	80.61	5.9	2.76e-31
XM_028884808.2	1164	Lcn2	2262.65	8.44	2.9e-66	1053.87	7.34	3.74e-33
XM_037201407.1	2659	Tnip1	33.71	5.94	4.39e-65	15.12	3.84	5.48e-11
XM_037199012.1	5120	Tmem164	29.22	6.4	6.79e-62	12.59	5.39	1.73e-09
XM_028868677.2	1838	Il1rn	655.48	6.26	1.23e-61	381.15	5.36	6.61e-26
XM_028881893.2	1292	Cxcl2	34.15	8.35	2.8e-59	188.29	14.33	4.41e-30
XM_037204566.1	1158	Lcn2	218.87	7.5	1.91e-58	101.16	6.63	9.02e-33
XM_037200580.1	1622	Gas7	144.8	6.06	5.65e-57	113.45	5.08	2.15e-22
XM_028866972.2	5216	Myo1d	42.02	5.53	1.75e-56	26.32	4.69	7.74e-30
XM_028892197.2	2933	Tgm1	45.37	5.32	3.61e-56	17.37	3.74	9.47e-14
XM_028880026.2	2832	Tnip1	91.9	6.36	8.52e-56	37.64	4.77	1.69e-17
XM_028884226.2	1585	Cblif	407.65	7.5	8.27e-55	225.65	4.94	1.76e-13
XM_028879198.2	2744	Olfm4	242.52	6.88	5.97e-53	45	4.91	1.19e-12
XM_028856166.2	1008	Pglyrp1	1567.88	5.83	1.87e-51	832.14	3.75	3.93e-10
XM_028860034.2	2335	Ltf	1515.57	7.58	8.5e-51	1124.26	7.31	1.69e-26
XM_028875171.2	3208	Il1rap	102.81	4.69	1.02e-50	41.73	2.53	1.47e-06
XM_037203030.1	2483	Fgr	126.12	4.91	1.63e-50	60.66	2.7	1.52e-06
XM_037199231.1	600	Saa1	845.07	15.06	1.03e-49	145.84	11.5	1.49e-62
XM_028856571.2	4740	Alpk1	27.79	4.02	1.6e-48	19.89	3.41	1.65e-13
XM_028862085.2	2703	Cd177	68.13	6.24	2.09e-48	43.62	4.92	5.06e-13
XM_028888721.2	2452	Smtnl2	68.31	5.43	5.17e-48	37.2	2.22	0.00136
XM_028876612.2	1743	Chi3l1	162.74	4.89	1.43e-47	129.89	3.22	5.43e-07
XM_028892581.2	2790	Socs3	345.57	4.73	3.14e-47	273.12	4.12	7.4e-15
XM_028864324.2	3163	Fcgr2b	91.65	5.18	1.54e-46	38.35	3.71	2.74e-21
XM_028884227.2	1121	Cblif	43.12	7.22	1.36e-45	12.93	4.33	4.18e-06
XM_037203027.1	2545	Fgr	185.45	4.88	4.54e-45	89.86	3.13	9.89e-09
XM_028864328.2	3307	Fcgr2b	56.64	4.33	7.23e-45	22.6	3.64	1.04e-15
XM_028892349.2	2621	C1rl	16.61	6.97	8.83e-45	14.28	4.29	2.55e-09
XM_028890551.2	837	Ccl3	72.95	7.15	2.06e-44	92.33	8.11	2.21e-56
XM_028859718.2	1310	Lrg1	409.2	6.8	5.96e-44	158.93	3.66	5.62e-07
XM_028892931.2	1655	Bst1	452.72	5.33	1.05e-43	191.28	2.75	1.2e-05
XM_028859123.2	2032	Paf1	310.65	4.36	1.09e-43	174.65	3.17	7.48e-10
XM_037197825.1	4637	Sbno2	43.18	7.52	9.59e-43	24.56	2.62	7.73e-05
XM_028866678.2	1287	Sod2	1759.3	4.76	9.59e-43	1168.18	3.37	1.44e-08
XM_028882108.2	1411	Serpinb1	714.57	5.06	1.14e-41	248.92	2.6	0.00075
XM_028884304.2	1133	Ms4a3	116.39	5.55	8.12e-41	53.59	3.89	2.27e-15
XM_028853955.2	3670	Mmp25	127.84	4.43	8.75e-41	50.29	2.01	0.000549
XM_037201212.1	1171	RIKEN cDNA 1810065E05, isoform CRA_a	186.36	5.59	9.29e-41	122.21	4.77	1.88e-13
XM_037207644.1	2125	St3gal4	64.86	3.69	2.01e-39	34.71	2.74	1.61e-07
XM_028874824.2	1235	Marcks	54.87	4.4	2.14e-39	50.03	3.6	6.09e-12
XM_028874350.2	1694	Gpr84	33.13	7.91	7.19e-39	20.83	6.14	1.28e-26
XM_028894546.2	1928	Cd274	63.13	4.01	7.92e-39	44.09	3.62	7.84e-16
XM_028890521.2	424	Wfdc21	259.85	5.87	1.64e-38	110.79	4.54	1.79e-16
XM_028891075.2	1298	Hp	1795.37	4.97	4.47e-38	682.38	2.52	0.000156
XM_028859947.2	1520	Treml4	73.86	4.28	2.73e-37	49.77	4	1.47e-10
XM_037211276.1	2075	Fcgr2a	93.92	4.2	1e-36	48.81	3.2	1.03e-12
XM_028885765.2	2046	Hcar2	70.27	4.76	1.48e-36	20.52	3.35	6.69e-12
XM_037211398.1	1695	Chi3l1	236.08	4.73	5.54e-36	179.25	3.77	1.13e-09
XM_028893634.2	1361	Agtrap	104.96	3.74	2.12e-35	83.73	2.55	7.09e-07
XM_028882006.2	2124	Dhrs9	86.02	3.68	2.2e-35	24.7	1.26	0.08
XM_028873144.2	1524	Anxa3	175.73	4.56	2.33e-35	76.42	2.66	2.97e-05
XM_028868478.2	2395	Mmp9	695.3	4.21	6.44e-35	486.8	2.13	0.01
XM_028864329.2	1187	Fcgr3	518.64	3.95	7.37e-35	261.44	2.87	1.86e-07
XM_028864327.2	2076	Fcgr2a	488.6	4.04	3.57e-34	337.06	3.26	1.51e-10
XM_028880027.2	2697	Tnip1	36.11	3.96	3.58e-34	58.97	5.05	2.6e-23
XM_037200321.1	4404	Tnfaip3	67.99	3.92	4.4e-34	71.05	4.67	1.65e-16
XM_028877852.2	979	Batf	113.48	3.78	5.08e-34	91.7	3.64	8.3e-18
XM_037197639.1	4752	Csf2rb	122.51	4	6.53e-34	68.27	2.52	1.31e-05
XM_028886872.2	758	Ngp	2187.69	4.36	6.93e-34	993.87	2.59	0.000329
XM_028866040.2	2975	Pxylp1	63.89	7.49	1.95e-33	15.78	5.46	1.69e-17
XM_028893881.2	1837	Bcl3	101.94	3.58	2.19e-33	91.12	3.08	2.24e-11
XM_037199644.1	1048	Srgn	2220.79	3.86	3.87e-33	1023.53	2.65	2.27e-06
XM_037197636.1	4811	Csf2rb	53.59	4.11	7.49e-33	40.53	1.99	0.00257
XM_037209236.1	1960	Ibsp	196.63	15.5	8.88e-33	184.98	12.37	1.22e-39
XM_028863283.2	1048	Trem1	137.02	4.41	1.12e-32	84.21	3.03	9.39e-11
XM_028857817.2	3924	Slc2a3	343.12	3.97	1.23e-32	110.2	1.21	0.17
XM_037201213.1	962	LOC114686457	41.24	6.78	3.98e-32	13.35	3.54	0.000148
XM_028853958.2	890	Msrb1	616.7	3.87	8.74e-32	231.45	1.95	0.00259
XM_028888017.2	2725	Cfb	82.72	5.74	1.6e-31	85.87	4.32	5.72e-11
XM_028862827.2	2965	Pkn1	21.47	-11.71	1.6e-31	28.32	-1.81	0.22
XM_028863733.2	3356	Hk3	249.08	3.95	2.02e-31	102.34	2.47	5.14e-05
XM_028882204.2	3015	Trib1	33.17	3.17	3.1e-31	13.25	1.89	0.000122
XM_037210129.1	3089	Gpr35	15.75	4.28	4.98e-31	11.06	3.35	1.53e-09
XM_028887051.2	722	Camp	840.89	6.78	1.06e-30	627.75	7.17	1.78e-28
XM_037197644.1	4559	Csf2rb	23.02	3.7	2.23e-30	20.78	1.77	0.0017
XM_037204888.1	1456	Cblif	126.78	6.9	5.11e-30	64.2	4.31	1.36e-15
XM_028879941.2	3522	Ets2	144.57	3.48	1.12e-29	88.47	2.64	3.2e-07
XM_028858544.2	5948	Sbno2	11.5	3.68	1.14e-29	10.51	2.32	9.36e-05
XM_028894000.2	1221	Glrx	98.96	3.11	3.15e-29	67.45	3.04	1.03e-12
XM_028863798.2	1103	Gadd45g	52.95	4.32	3.69e-29	24.44	3.11	4.27e-08
XM_028871067.2	1832	Ncf4	212.78	3.53	7.18e-29	128.33	2.4	1.27e-05
XM_037197641.1	4748	Csf2rb	38.46	3.78	1.03e-28	20.92	2.35	1.43e-05
XM_028869724.2	1587	Nfkbia	307.41	3.43	1.14e-28	274.44	3.41	3.98e-12
XM_028865255.2	1937	Wipi1	54.79	3.52	1.18e-28	31.58	1.68	0.00445
XM_028885750.2	1133	Cybrd1	57.81	3.66	2.55e-28	65.14	3.53	4.78e-13
XM_028877491.2	2329	Dgat2	81.74	4.32	2.89e-28	49.57	1.97	0.00506
XM_028864452.2	1523	Prdx6	182.73	3.47	3.44e-28	76.97	2.7	7.06e-09
XM_028882781.2	4883	Tbc1d2	17.08	3.7	3.96e-28	10.78	0.59	0.6
XM_028865982.2	1746	Plscr1	137.93	3.82	4.04e-28	113.99	3.71	3.68e-10
XM_028893766.2	1495	Anxa1	1919.95	4.03	7.92e-28	971	1.83	0.01
XM_028893309.2	3223	Cebpd	23.35	4.13	1.21e-27	32.35	3.4	2.05e-10
XM_037211285.1	766	Ftl1	66.97	-6.31	1.73e-27	30.21	-2.56	0.08
XM_028871982.2	1166	Pstpip2	72.74	3.4	3.6e-27	45.36	1.99	0.000617
XM_028889626.2	1791	Cd300lf	147.45	3.31	5.09e-27	56.85	1.34	0.04
XM_028861705.2	1161	Ier3	73.99	3.55	6.89e-27	86.52	4.04	2.07e-23
XM_037201568.1	2476	Flot2	34.36	3.95	7.28e-27	13.38	1.84	0.00077
XM_028871478.2	495	Mt1	125.74	5.18	7.56e-27	581.07	6.75	5.69e-24
XM_028872432.2	3320	Icam1	33.7	3.06	9.08e-27	74.41	3.86	2.12e-10
XM_028865651.2	4521	Arid5a	30.67	3.01	1.9e-26	16.94	2.39	9.26e-07
XM_028891815.2	6613	N4bp1	107.78	3.34	3.21e-26	54.21	2.33	6.17e-06
XM_028890852.2	461	S100a8	33409.9	3.88	8.65e-26	9765.38	1.57	0.05
XM_028854938.2	1405	C5ar1	226.4	3.41	8.86e-26	109.1	1.54	0.01
XM_028867490.2	3644	Nfkbiz	46.84	3.44	1.11e-25	41.32	3.62	1.62e-16
XM_037200800.1	1774	Cd300lf	35.97	3.39	1.38e-25	13.95	2.12	0.00574
XM_028859174.2	735	Gmfg	193.59	3.42	2.4e-25	61.59	1.96	0.000498
XM_028867272.1	747	Plac8	1444.17	3.62	2.44e-25	921.55	2.35	8.23e-05
XM_028858293.2	1546	Siglece	50.97	3.58	6.12e-25	23.6	2.23	3.69e-05
XM_028871551.2	2004	Adgrg3	45.14	3.25	7.01e-25	24.08	1.42	0.05
XM_028884235.2	2828	Slc15a3	51.49	3.04	1.23e-24	37.33	2.51	9.88e-08
XM_028885451.2	2623	Zc3h12a	33.71	3.06	2.25e-24	35.04	3.05	1.7e-11
XM_028888907.2	4092	Tp53inp2	46.19	3.67	3.25e-24	40.16	2.99	5.03e-05
XM_037201214.1	944	LOC114686457	27.2	6.64	3.47e-24	22.93	3.42	0.00152
XM_037200423.1	1514	Arg1	1797.56	4.21	3.89e-24	605.39	2.14	0.00206
XR_005089974.1	1123	LOC114706499	345.87	3.16	4.67e-24	232.35	1.9	0.00832
XM_028893401.2	1314	Il1b	2512.74	3.93	4.68e-24	2205.27	3.94	1.37e-10
XM_028864044.2	2516	Rassf4	81.55	3.4	6.05e-24	111.27	3.66	9.44e-11
XM_028865983.2	1720	Plscr1	39.35	4.66	9.39e-24	22.77	3.64	9.55e-11
XM_028870697.2	3742	Limk2	16.96	5.31	1.54e-23	18.17	4.48	1.42e-15
XM_037199833.1	2966	Ncr2	106.26	3.47	1.64e-23	72.18	2.52	1.27e-05
XM_028891396.2	4570	Pfkfb3	33.22	4.3	3.86e-23	34.6	4.54	2.43e-16
XM_028871772.2	1813	Tfec	45.94	3.68	4.1e-23	31.45	2.84	4.12e-08
XM_028890855.2	585	S100a9	29388.1	3.79	5.06e-23	12203.8	1.71	0.04
XM_037198316.1	3086	Serpine1	11.27	8.41	5.37e-23	340.39	12.3	9.06e-23
XM_028880787.2	4080	Crispld2	38.75	3.28	5.5e-23	12.68	1.15	0.04
XM_028878785.2	1252	Sds	265.46	4.21	5.81e-23	97.82	1.91	0.00263
XM_028869610.2	2918	Irak3	64.01	2.84	7.52e-23	50.16	2.66	6.42e-09
XM_028871479.2	407	Mt2	108.07	6.3	8.69e-23	528.96	9.58	7.67e-33
XM_028857368.2	756	Retn	59.07	4.56	1.09e-22	38.99	2.02	0.02
XM_028894001.2	1218	Glrx	45.6	3.52	1.43e-22	27.35	3.04	1.9e-07
XM_028864728.2	5145	Gca	14.83	3.32	1.49e-22	10.71	1.92	0.00292
XM_028888075.2	5830	Thbs1	149.33	4.03	1.59e-22	453.26	4.58	2.74e-10
XM_037205840.1	1278	Serpinb1	90.07	5.78	2.89e-22	19.55	1.71	0.07
XM_028891008.2	1480	Upp1	167.89	3.49	5.27e-22	101.21	1.13	0.24
XM_028878655.2	692	C4H15orf48	147.37	3.44	6.47e-22	67.07	2.31	5.03e-05
XM_028880029.2	2781	Tnip1	79.79	2.98	7.48e-22	61.06	2.68	1.55e-09
XM_037211311.1	3221	Selp	62.98	3.88	8.17e-22	307.3	4.56	4.65e-08
XM_028859919.2	2285	Pram1	77.91	3.98	8.86e-22	41.32	1.6	0.03
XM_037202374.1	1213	Sirpb1	176.78	3.61	1.07e-21	43.89	1.5	0.00918
XM_037199931.1	1218	Trem4	35.37	4.9	1.72e-21	10.34	2.31	0.07
XM_028889612.2	1527	Sphk1	35.12	5.39	1.83e-21	21.2	3.98	1.1e-11
XM_028860761.2	4620	Tnfaip3	28.61	3.54	4.27e-21	58.17	4.22	8.55e-13
XM_028862915.2	807	Gadd45b	62.52	3.27	4.95e-21	33.35	2.15	0.000155
XM_028873584.2	3979	Nlrc4	37.84	2.88	5.43e-21	22.19	2.2	4.42e-07
XM_028893901.2	6466	Cemip2	13.46	3.47	9.12e-21	18.78	3.78	2.05e-10
XM_028876726.2	750	Batf3	24.36	4.85	1.11e-20	19	4.65	2.25e-11
XM_028871497.2	1929	Ces1d	26.9	3.26	1.51e-20	16.93	1.75	0.02
XM_028856865.2	1460	Tmem106a	42.44	3.58	1.7e-20	24.93	1.9	0.00522
XM_028881290.2	7460	Atp11a	62.18	2.9	3.77e-20	28.92	1.97	0.000203
XM_028856420.2	2845	Ugcg	157.71	2.83	4.43e-20	79.67	2.07	0.000158
XM_028878069.2	927	Alox5ap	374.4	2.98	6.23e-20	177.32	1.44	0.02
XM_037197113.1	8066	Arhgap26	21.72	2.53	6.8e-20	11.91	2.15	3.04e-06
XM_028893102.2	2723	Cxcr2	299.48	3.05	7.24e-20	110.42	1.1	0.22
XM_028873528.2	1548	Pnp	169.37	2.55	7.39e-20	313.99	3.11	4.04e-07
XM_028857288.2	3318	Ppp1r3d	26.75	2.86	1.12e-19	14.12	1.07	0.22
XR_005092490.1	1130	LOC119088771	449.81	2.92	1.43e-19	192.47	1.95	0.00111
XM_037205723.1	2733	Nfil3	31.88	3.71	1.62e-19	18.1	2.31	7.59e-06
XM_028876189.2	1659	Csprs	34.67	3.5	1.84e-19	54.16	4.13	3.96e-16
XM_028892179.2	2341	Ltb4r	49.04	2.76	2.1e-19	34.03	1.42	0.02
XM_037211275.1	3309	Fcgr2b	55.85	3.78	2.22e-19	23.7	2.8	5.93e-13
XM_037199929.1	1311	Trem4	68.49	4.59	2.69e-19	28.72	2.4	0.000349
XM_028887864.2	4344	Tlr4	36.92	2.68	2.69e-19	17.31	1.16	0.09
XM_028856765.2	992	Tspo	80.88	3.01	2.98e-19	33.66	0.7	0.55
XM_037197643.1	4506	Csf2rb	30.96	3.15	3.25e-19	13.67	2.29	1.93e-05
XM_028868678.2	1818	Il1rn	51.31	2.77	4.34e-19	41.02	2.29	6.01e-06
XM_037205487.1	8092	Helz2	28.44	2.87	4.92e-19	12.2	1.7	0.00303
XM_028865650.2	4524	Arid5a	19.54	2.9	5.36e-19	11.5	1.88	0.000196
XM_028880275.2	3434	Txnrd1	17.53	3.66	5.61e-19	12.58	1.78	0.000858
XM_028884941.2	1382	Timp1	16.38	4.82	6.66e-19	17.43	4.82	2.26e-12
XM_037203031.1	2412	Fgr	32.17	3.03	8.24e-19	19.77	1.68	0.00165
XM_028895314.1	2242	Alas1	38.71	2.54	9.85e-19	64.19	3.44	1.43e-12
XM_028872738.2	1686	Prok2	76.99	3.93	9.86e-19	18.12	-0.00533	1
XM_028873432.2	3653	Picalm	98.94	2.76	9.93e-19	62.82	1.69	0.00785
XM_028884234.2	3506	Tmem132a	17.36	2.95	1.16e-18	15.63	2.43	2.29e-06
XM_028885676.2	3103	Inpp5f	28.88	2.54	1.41e-18	12.51	1.92	0.000194
XM_028860656.2	4471	Hip1	30.63	2.91	1.56e-18	15.31	0.84	0.28
XM_028868578.2	1547	Cebpb	33.21	3.19	2.06e-18	54.63	3.49	3.37e-12
XM_028887322.2	3958	Il13ra1	118.86	3.09	2.34e-18	50.71	1.93	0.000761
XM_028859043.2	1635	Clec5a	75.88	3.49	2.35e-18	18.33	1.17	0.12
XM_028860502.2	2281	Aoah	94.86	2.86	2.68e-18	61.92	2.17	2.89e-06
XM_028885699.2	6239	Megf9	38.1	3	2.79e-18	23.48	1.62	0.05
XM_028877403.2	1515	Arg1	446.66	4.55	3.28e-18	288.49	2.54	0.04
XM_028884147.2	1665	Msra	40.22	3.3	3.8e-18	25.81	1.89	0.0043
XM_028877802.2	2955	Gramd1a	47.26	2.96	4.21e-18	33.06	2.46	5.53e-09
XM_028871069.2	4502	Csf2rb	16.94	3.33	7.49e-18	10.03	2.04	1.57e-05
XM_028862630.2	2302	Clec4e	35.34	3.08	9.02e-18	36.44	2.57	8.99e-06
XM_028887499.2	960	Id1	29.46	3.92	1.39e-17	14.26	2.9	0.000144
XM_028861698.2	1779	Flot1	206.1	2.78	2.47e-17	125.59	1.76	0.00218
XM_028893898.2	1297	Plaur	47.89	3.17	2.74e-17	42.23	2.84	2.68e-09
XM_028886840.2	1641	Cd14	524.49	3.18	2.87e-17	502.95	2.47	0.000378
XM_037202924.1	3359	Csf3r	256.47	2.97	2.9e-17	70.32	0.9	0.35
XM_028876897.2	897	Ppp1r3b	28.11	3.98	3.01e-17	10.25	2.14	0.03
XM_028885034.2	2618	Pim1	227.12	2.69	3.09e-17	122.38	1.88	0.000717
XM_028870696.2	3537	Limk2	31.72	2.67	3.28e-17	23.38	2.2	3.25e-06
XM_028858079.2	4699	Hif1a	26.46	2.52	3.59e-17	24.64	2.11	0.000178
XM_037202226.1	1398	Tarm1	67.47	3.16	3.95e-17	20.44	1.52	0.01
XM_037209579.1	1288	Pgd	94.33	2.71	4.13e-17	56.16	0.74	0.43
XM_028890405.2	2390	Tpd52	30.65	2.96	4.4e-17	23.97	2.66	7.1e-08
XM_028878524.2	2094	Sdcbp	297.07	2.51	4.63e-17	162.03	1.83	0.000986
XM_037205570.1	1964	B4galt5	91.8	2.82	5.32e-17	35.75	1.48	0.00698
XM_028855869.2	3165	Ehd1	117.79	2.79	6.72e-17	100.21	2.38	3.81e-05
XM_028862233.2	3121	Junb	59.98	2.68	6.79e-17	54.32	2.12	3.81e-05
XM_037206840.1	4222	Pik3ap1	33.94	2.54	6.79e-17	14.56	1.85	0.000108
XM_028889392.2	4625	Pik3ap1	80.79	2.76	6.99e-17	51.5	2.01	0.00136
XM_028892550.2	2197	Pgs1	43.32	2.38	7.82e-17	32.66	1.97	1.73e-05
XM_037203890.1	2899	Mxd1	124.38	2.93	8.53e-17	56.62	1.36	0.04
XR_005092491.1	1323	LOC119088771	176.84	2.67	1.38e-16	44.69	1.61	0.00323
XM_028881407.2	4426	Cybb	417.98	2.71	1.82e-16	342.4	2.43	5.03e-05
XM_037201405.1	2521	Tnip1	21.44	3.65	1.87e-16	29.25	4.53	2.09e-20
XM_028873150.2	5350	Antxr2	53.85	2.7	1.97e-16	30.86	1.75	0.0019
XM_028887461.2	2105	Hck	248.32	2.62	2.34e-16	191.69	1.99	0.000493
XM_028855596.2	2072	Samhd1	509.47	2.6	2.34e-16	225.39	1.2	0.09
XM_028894751.2	1846	Glipr2	216.31	2.63	2.86e-16	112.53	1.71	0.00375
XM_028885448.2	3226	Csf3r	406.26	2.92	3.5e-16	139.33	1.01	0.29
XM_037203622.1	14526	LOC114684453	50.12	3.27	3.66e-16	18.46	0.09	0.96
XM_028893099.2	2185	Slc11a1	216.98	2.66	3.66e-16	171.87	2.07	0.000957
XM_037203028.1	2472	Fgr	26.44	2.89	3.78e-16	15.64	1.52	0.00698
XM_037197150.1	1638	Lmnb1	142.95	2.41	3.85e-16	53.88	1.1	0.05
XM_028892659.2	778	Orm1	249.78	7.19	4.63e-16	221.72	3.54	0.00136
XM_028883747.2	1481	Ckb	63.1	2.61	4.66e-16	33.04	1.54	0.00214
XM_028893824.2	3003	Eml2	22.44	2.57	5.23e-16	10.73	1.08	0.12
XM_028860284.2	683	Saa5	456.3	16.42	5.61e-16	189.75	12.49	1.28e-48
XM_028888153.2	3335	Ptafr	76.91	2.79	6.3e-16	40.61	1.66	0.00206
XM_028871771.2	2031	Tes	119.23	2.58	6.3e-16	83.49	2.16	1.04e-05
XM_028865640.2	2344	Slamf1	47.79	2.55	6.66e-16	42.8	2.7	7.18e-09
XM_028859188.2	1666	Zfp36	335.83	2.64	7.27e-16	213.74	1.81	0.00191
XM_028888360.2	2915	Fkbp5	57.06	2.66	7.42e-16	25.06	2.03	4.9e-06
XM_028854779.2	2549	Oas2	131.31	3.97	8.37e-16	61.99	1.49	0.13
XM_028853710.2	881	Prdx5	212.04	2.55	8.75e-16	128.35	1.94	0.000128
XM_037202923.1	3229	Csf3r	217.18	2.96	9.63e-16	90.23	1.11	0.3
XM_028887933.2	1622	Tnf	42.74	3.2	1.06e-15	12.41	1.81	0.01
XM_028872367.2	3967	Msr1	10.87	3.62	1.36e-15	34.04	4.53	3.26e-09
XM_028878137.2	2016	Rubcnl	78.64	2.55	1.77e-15	28.79	1.77	4.17e-05
XM_037206298.1	2264	Osgin1	20.5	3.14	1.86e-15	12.43	2.46	0.00091
XM_037203889.1	2704	Mxd1	82.97	2.77	3.79e-15	49.6	1.55	0.01
XM_028864149.2	2556	Snx10	20.65	2.59	4.5e-15	23.76	2.8	2.56e-06
XM_028880607.2	2425	Nfe2l2	56.39	2.28	4.63e-15	74.98	2.4	8.2e-05
XM_028893909.2	6113	Cemip2	27.39	2.35	5.06e-15	22.15	2.35	2.27e-06
XM_037202431.1	2017	Sdcbp	211.46	2.57	5.27e-15	118.23	1.69	0.00221
XM_028868566.2	2148	B4galt5	35.93	2.68	5.4e-15	33.04	1.15	0.11
XM_037209721.1	3155	Hhla2	32.77	2.2	5.84e-15	15.39	0.46	0.68
XM_028890776.2	1515	Dap3	16.08	3.39	7.39e-15	19.58	3.05	3.69e-07
XM_028858088.2	4696	Hif1a	26.87	2.27	8.43e-15	26.32	2.31	3.15e-05
XM_028884543.2	4485	Snx18	37.05	2.35	1.01e-14	20.36	1.23	0.06
XM_028872948.2	1209	Socs1	23.05	4.27	1.19e-14	41.36	5.3	6.24e-31
XM_028881371.2	2266	Pim2	87.55	3	1.31e-14	37.83	2.62	5.2e-11
XM_037200605.1	3805	Mefv	19.37	2.78	1.32e-14	13.16	1.56	0.02
XM_028873674.2	4867	Xdh	134.35	2.56	1.34e-14	78.38	1.33	0.08
XM_028876501.2	3255	Ikbke	87.31	2.43	1.43e-14	58.79	1.51	0.00946
XM_028878542.2	691	Dnajc15	797.42	-7.78	1.49e-14	669.42	0.59	0.84
XM_028861083.2	2928	Nfam1	75.49	2.75	1.56e-14	31.8	0.61	0.56
XM_028874705.2	3029	Nfkb2	24.19	2.3	1.96e-14	18.4	2.11	3.77e-05
XM_028887969.2	489	Lst1	454.56	2.62	2.09e-14	167.29	1.24	0.04
XM_028857921.2	4052	Gk	29.21	2.41	2.55e-14	19.31	1.75	0.0013
XM_028858621.2	2385	Sav1	54.94	2.28	2.67e-14	32.53	2.09	8.01e-07
XM_028872450.2	1289	Cdkn2d	76.7	2.16	3.06e-14	42.72	0.95	0.11
XM_037202347.1	2174	Tpd52	47.72	2.51	3.35e-14	27.78	2.37	4.17e-07
XM_028870303.2	3199	Jun	12.15	2.55	4.29e-14	13.75	2.92	1.84e-12
XM_037199930.1	1309	Trem4	49.53	3.08	5.03e-14	20.81	2.33	0.00351
XM_028884064.2	3840	Ddx58	39.2	2.68	5.46e-14	23.11	1.85	0.000708
XM_028890959.2	2548	Birc3	83.68	2.16	5.64e-14	87.13	2.6	4.33e-07
XM_028887447.2	3919	Pofut1	93.72	2.34	5.74e-14	52.92	1	0.18
XM_028871463.2	2289	Cpne2	54.68	2.45	7.17e-14	26.3	1	0.14
XM_028871495.2	1856	Ces1g	12.87	3.37	7.69e-14	12.59	1.68	0.06
XM_028862398.2	3401	Steap4	57.2	3.27	8.9e-14	40.23	2.15	0.00243
XM_028865281.2	5488	Kcnj2	18.52	2.21	8.9e-14	11.95	1.36	0.05
XM_028857366.2	1284	Mcemp1	214.74	3.99	9.38e-14	144.18	2.09	0.00193
XM_037199666.1	2777	Kir3dp1	55.01	2.37	9.79e-14	21.17	0.73	0.41
XM_028874408.2	1727	Nfe2	122.09	2.63	1.2e-13	62.73	1.03	0.15
XM_028888908.2	3973	Tp53inp2	16.36	3.07	1.33e-13	16.44	1.95	0.00603
XM_028876006.2	2927	Sla	80.57	2.62	1.36e-13	47.42	2.39	4.28e-07
XM_028891860.2	3843	Optn	37.15	2.16	1.91e-13	21.36	1.82	3.23e-05
XM_028878860.2	1455	Spi1	230.55	2.42	2.49e-13	174.33	1.53	0.02
XM_037203675.1	621	Rpl17	228.68	-5.7	2.53e-13	158.88	4.33	0.000156
XM_028864037.2	2574	Alox5	59.51	2.25	2.56e-13	46.78	0.31	0.83
XM_028894284.2	5023	Tlr2	23.22	2.19	3.2e-13	41.09	2.69	3.46e-05
XM_028865763.2	4672	Rnf149	35.96	2.08	3.56e-13	13.43	1.4	0.00301
XM_028870950.2	1920	Dgat1	41.2	2.15	4.09e-13	22.16	1.05	0.12
XM_028894620.2	4964	Dennd5a	124.63	2.24	4.36e-13	86.24	1.77	0.00189
XM_037201697.1	5100	C3	17.19	4.84	4.43e-13	10.33	3.25	0.000739
XM_028855812.2	2605	Rnf19b	56.48	2.15	4.49e-13	41.95	1.75	0.000124
XM_028895342.2	2099	Cish	61.27	2.83	4.78e-13	37.28	3.12	4.62e-14
XM_037203026.1	2475	Fgr	345.51	2.41	5.68e-13	225.53	1.37	0.04
XM_037206473.1	1859	Ces1h	19.05	2.95	6.13e-13	13.45	1.92	0.02
XM_028854586.2	4170	Clcn7	38.67	2.23	6.32e-13	18.51	1.38	0.00645
XM_028874703.2	3032	Nfkb2	23.59	2.16	7.62e-13	23.03	2.51	5.79e-10
XM_028876483.2	2138	Fos	13.01	-3.15	8.93e-13	13.14	-2.47	3.77e-05
XM_028856800.2	4708	Stat3	29.14	2.18	9.72e-13	18.45	1.79	0.000156
XM_028861318.2	3723	Apobr	77.32	2.33	1.35e-12	38.86	0.54	0.63
XM_028860726.2	1994	Ifngr1	142.7	2.24	1.76e-12	70.46	0.89	0.29
XM_028858559.2	3771	Midn	25.72	2.17	1.89e-12	19.64	0.98	0.17
XM_028862987.2	2088	Serpina3f	16.22	3.87	1.96e-12	13.62	1.48	0.08
XM_028866853.1	2649	Flot2	68.51	2.13	1.96e-12	55.41	0.99	0.18
XM_028879113.1	2765	Macir	19	2.63	2.02e-12	13.4	1.93	0.000881
XM_028861099.2	6880	Stxbp5	43.13	2.4	2.14e-12	17.26	1.09	0.1
XR_005091992.1	899	C7H19orf38	56.63	2.56	2.64e-12	20.41	1.15	0.2
XM_028873276.2	3292	Eif2ak2	27.59	2.31	2.67e-12	18.89	1.82	0.000736
XM_028858457.2	3289	H6pd	26.57	2.54	3.23e-12	23.07	2.09	0.000804
XM_028864148.2	3355	Skap2	143.69	2.25	3.74e-12	75	0.8	0.4
XM_028859044.2	1557	Clec5a	116.99	3.07	3.76e-12	28.57	1.5	0.02
XM_028891388.2	2952	Nadk	159.81	2.22	3.76e-12	91.78	1.48	0.01
XM_028862647.2	3070	Parp9	41.39	2.09	3.88e-12	22	1.18	0.03
XM_037211435.1	2545	Ikbke	23.96	2.64	3.94e-12	15.84	2.58	7.65e-07
XM_028893723.2	2821	Lamp2	61.48	2.18	4.26e-12	30.85	1.03	0.11
XM_028886095.2	2748	Stom	189.42	2.35	4.42e-12	114.91	1.65	0.01
XM_037208848.1	6368	LOC114689465	113.11	2.28	4.56e-12	31.47	1.36	0.04
XM_028883763.2	3458	Tnfaip2	19.36	2.75	4.7e-12	30.92	3.58	4.25e-09
XM_028873441.2	3503	Picalm	87.93	2.41	4.75e-12	42.91	1.24	0.06
XM_028863790.2	2770	Nfil3	19.22	3.08	4.97e-12	17.6	2.56	5.37e-06
XM_028880416.2	1629	Usp18	43.91	2.78	5.32e-12	35.56	2.25	0.000323
XM_028888863.2	2245	Osbpl9	63.93	2.29	5.48e-12	31.7	0.88	0.17
XM_028856799.2	4711	Stat3	105.01	2.12	5.84e-12	63.81	1.65	0.00293
XM_028869475.2	2832	Inpp5a	26.16	2.16	7.23e-12	12.81	0.82	0.27
XM_037202022.1	1872	Gbp2	62.04	2.2	7.39e-12	117.63	2.67	8.69e-05
XM_028854887.2	1562	Hmox1	69.72	2.33	7.41e-12	71.25	2.61	7.5e-08
XM_028880298.2	3025	Dram1	26.69	3.09	7.47e-12	34.16	4.27	1.54e-14
XM_028889246.2	1843	Lbp	97.87	2.59	8.52e-12	48.59	-0.06	0.97
XM_028858307.2	2610	Siglecg	27.52	2.15	8.52e-12	11.18	0.94	0.12
XM_028872074.2	3018	Cd200r1	14.53	2.41	9.6e-12	10.21	1.91	0.000808
XM_037201058.1	1523	Nlrp1a	39.88	2.21	9.88e-12	19.87	1.54	0.0031
XM_028871940.2	2504	Lipg	38.21	4.49	1.95e-11	108.86	6.06	1.88e-19
XM_037197954.1	2387	Pram1	45.82	4.18	2e-11	19.39	1.47	0.1
XM_037210275.1	2422	Cxcr2	80.36	3.49	2.21e-11	53.88	2.18	0.00383
XM_028871685.2	5345	Cert1	31.7	2.12	2.24e-11	18.37	1.31	0.02
XM_028861203.2	5128	C3	381.63	2.61	2.36e-11	682.25	2.93	6.96e-06
XM_028876009.2	3241	Sla	206.38	2.4	2.36e-11	193.38	2.44	5.12e-06
XM_028856677.2	3839	Lztr1	51.63	2	2.4e-11	27.36	0.57	0.55
XM_028865632.2	1051	Crp	14.81	5.87	2.44e-11	13.48	3.88	9.32e-07
XM_028881924.2	1182	Cxcl10	14.04	4.22	2.51e-11	137.94	5.8	3.09e-24
XM_028883166.2	3546	Cmpk2	17.68	2.79	2.84e-11	15.83	2	0.000262
XM_037203914.1	3398	Iqsec1	31.66	2.17	2.99e-11	16.12	0.27	0.84
XM_028872897.2	1542	Litaf	117.7	2.1	3.07e-11	86.92	1.49	0.02
XM_028887457.2	5499	Plagl2	42.71	2.48	3.42e-11	29.38	2	0.000106
XM_028878191.2	6547	Zc3h13	11.11	2.44	3.45e-11	11.37	2.6	0.000231
XM_037206979.1	701	Cd53	254.33	1.99	3.67e-11	141.5	1.52	0.00156
XM_028892728.2	6011	Atp8b4	35.71	2.18	3.86e-11	16.97	0.44	0.75
XM_028872298.2	1365	Rab20	14.49	3.26	4.04e-11	18.28	2.85	0.0002
XM_028886267.2	2321	B4galnt1	83.19	2.13	4.05e-11	50.34	1.51	0.01
XM_037202573.1	6350	Pax5	20.93	-1.9	5.97e-11	19.94	-1.38	0.05
XM_028858560.2	3641	Midn	35.64	2.01	6.41e-11	32.11	1.38	0.02
XM_028871672.2	1782	F2rl2	42.92	2.51	6.67e-11	15.93	-0.63	0.62
XM_028875068.2	2278	Pdcd4	48.25	-2.24	6.69e-11	41.48	-1.9	0.000244
XM_028888871.2	546	Clec4a2	123.8	3.02	7.4e-11	84.38	1.88	0.00462
XM_037198385.1	831	Alox5ap	32.34	2.79	7.41e-11	19.82	1.04	0.4
XM_028858543.2	4621	Sbno2	45.34	1.92	7.87e-11	32.77	0.9	0.4
XM_028874469.2	1016	Prr13	91.47	2	8.53e-11	48.49	0.91	0.2
XM_028864332.2	3122	Atf6	56.32	2.28	9.13e-11	35.16	1.83	0.00364
XM_028855239.2	803	Tyrobp	580.3	2.22	9.72e-11	325.82	1.18	0.08
XM_028866979.2	825	Ccl2	14.5	6.24	9.93e-11	11.53	4.24	0.000156
XM_028893599.2	2224	Pgd	327.29	2.12	1.36e-10	183.28	0.64	0.57
XM_028895348.2	844	Manf	77.02	1.93	1.5e-10	60.27	1.62	0.000773
XM_028877115.2	2216	Olig1	41.4	2.62	1.54e-10	27.59	1.61	0.0041
XM_028887200.2	2723	Ccnd3	34.21	1.9	1.54e-10	20.51	0.74	0.4
XM_028878198.2	6574	Zc3h13	12.36	2.34	1.61e-10	11.92	2.52	0.00083
XM_028881865.2	4481	Rin2	21.21	2.16	1.63e-10	11.54	1.42	0.02
XM_028876496.1	2880	Mapkapk2	133.85	2.13	1.91e-10	68.97	1.47	0.00826
XM_028861947.2	548	S100a11	916.85	2.27	2.16e-10	564.54	1.35	0.04
XM_028878206.2	6544	Zc3h13	12.32	2.13	2.17e-10	11.18	2.17	3.39e-06
XM_028870218.2	1337	Ncf1	235.26	2.16	2.25e-10	203.23	1.68	0.00713
XM_028854997.2	4438	Tbc1d9b	18	1.88	2.36e-10	15.48	1.74	0.00309
XM_028859890.2	2193	Tgfb1	152.97	1.98	2.5e-10	105.42	1.42	0.01
XM_028853878.2	1186	Atp6v0c	234.77	2	2.62e-10	213.55	1.78	0.00156
XM_037201934.1	464	Cd53	216.86	1.85	2.64e-10	102.79	1.25	0.01
XM_028856355.2	2949	LOC114682475	46.22	2.18	2.7e-10	18.49	0.08	0.96
XM_028894306.2	3223	Aacs	54.32	2.16	2.82e-10	25.14	0.5	0.62
XM_028877107.2	1588	Ifngr2	70.38	2.06	3.21e-10	43.41	1.34	0.00964
XM_037197827.1	4544	Sbno2	29.25	15.43	3.25e-10	10.38	9.22	1.04e-15
XM_028861006.2	2388	Scimp	68.34	2.4	3.4e-10	24.82	0.74	0.33
XM_028877084.2	3483	Numb	36.18	2.05	3.62e-10	19.12	0.56	0.56
XM_028873346.2	5206	Foxo1	30.54	-1.82	3.68e-10	21.81	-1.73	0.000304
XM_028881009.2	2870	Mboat1	22.3	2.05	3.86e-10	12.43	0.11	0.95
XM_028877563.2	3231	Arap1	38.41	2.2	4.45e-10	19.47	1.24	0.03
XM_028892331.2	2318	Tnfrsf1a	67.56	2.02	4.7e-10	42.41	0.85	0.25
XM_028885276.2	9185	Helz2	46.7	2.39	5.69e-10	20.94	1.38	0.08
XM_028886779.2	3695	Ctnna1	19.92	1.84	6.45e-10	17.08	1.87	0.000136
XM_028877106.2	1590	Ifngr2	178.98	2.09	6.73e-10	101.67	1.13	0.07
XM_028861626.2	2250	Hspa8	21.34	-5.6	7.22e-10	48.51	0.9	0.75
XM_028893864.2	2314	Vasp	120.93	2.09	7.84e-10	78.3	0.93	0.25
XM_037201988.1	2249	LOC114706337	104.69	1.93	7.97e-10	48.54	1.25	0.02
XM_028882412.2	3644	Arhgef3	59.89	1.86	8.46e-10	34.54	1.42	0.00384
XM_028857838.2	1393	Clec4a	26.3	2.68	8.78e-10	14.37	1.93	0.0045
XM_028875192.2	1551	Rtp4	92.24	2.18	1.15e-09	43.52	1.26	0.04
XM_028891273.2	2114	Tkt	287.19	1.92	1.47e-09	192.15	0.67	0.53
XM_028871371.2	4770	Hk2	17	2.28	1.52e-09	10.07	1.23	0.04
XM_037201814.1	616	Timd2	875.61	2.48	1.56e-09	3839.02	3.79	1.11e-05
XM_037198413.1	1921	Fcer2	38.78	-2.17	1.71e-09	40.01	-2.52	4.22e-06
XM_037208443.1	4007	Ptk2b	50.43	1.95	1.83e-09	25.78	0.29	0.83
XM_037201745.1	1341	LOC114688014	125.65	1.76	2.13e-09	61.79	1.06	0.04
XM_028877562.1	5176	Arap1	29.2	2.28	2.21e-09	22.35	2.08	0.000103
XM_028868580.2	1782	Ptpn1	108.61	1.91	2.25e-09	96.38	1.76	0.000891
XM_028871493.2	2002	Ces1d	16.8	2.51	2.47e-09	11.93	1.92	0.02
XM_028856427.2	1076	Gng10	662.02	2.06	2.61e-09	369.34	0.94	0.32
XM_028889425.2	1345	Csf3	14.09	12.67	2.88e-09	90.71	12.87	2.79e-31
XM_028867469.2	1360	Cd47	100.12	1.7	2.88e-09	67.39	1.19	0.03
XM_028874775.2	2385	Samsn1	96.43	1.91	3.3e-09	67.47	1.59	0.00501
XM_028890480.2	3116	Ano10	18.01	2.09	3.38e-09	10.56	1.35	0.01
XM_028880842.2	785	Cyba	449.47	1.9	3.46e-09	464.41	1.67	0.00651
XR_003735908.2	616	LOC114701976	109.7	-1.74	3.56e-09	66.48	-2.17	0.000796
XM_037204151.1	1113	Clec4a	27.89	2.58	3.71e-09	15.09	0.86	0.46
XM_028862433.2	1208	Steap1	15.04	12.49	4.05e-09	28.29	8	1.29e-24
XM_028873954.2	6770	Fosl2	24.05	2.08	4.18e-09	17.75	1.18	0.12
XM_028870802.2	3017	Sh3bp2	22.46	2.44	4.36e-09	10.95	1.43	0.04
XM_028885715.2	2042	Cflar	13.7	2.48	4.52e-09	15.51	2.48	0.000887
XM_028869259.2	8314	Lrrk2	58.17	2.1	4.61e-09	20.39	-0.45	0.74
XM_028867318.2	2945	Gbp6	49.23	1.93	4.63e-09	14.74	1.39	0.07
XM_028860900.2	1748	Gyg1	56.71	1.82	4.7e-09	29.14	1.18	0.04
XM_028873391.1	1971	Fez2	32.55	1.84	4.87e-09	23.27	1.16	0.04
XM_028867308.2	2077	Tank	36.74	1.95	4.9e-09	24.02	2.09	9.13e-06
XM_028873048.2	6994	Osbpl8	40.92	1.98	5.31e-09	18.73	1.38	0.02
XM_028878861.2	1431	Spi1	37.54	2.12	5.49e-09	31.47	1.33	0.03
XM_028887201.2	1899	Ccnd3	28.36	2	5.58e-09	10.79	0.84	0.28
XM_028859831.2	3801	B3galnt2	26.59	1.8	6.35e-09	13.31	0.96	0.12
XM_028861280.2	615	Cstb	164.34	1.73	6.56e-09	237.03	1.98	0.0017
XM_028855928.2	1555	Cdc42ep2	17.55	2.58	6.65e-09	17.53	2.85	8.31e-06
XM_028891327.2	2817	Cd36	16.65	-2.41	6.65e-09	14.82	-2.12	0.000287
XM_028877410.2	2147	Stx7	45.38	1.88	7.04e-09	44.32	1.77	0.00039
XM_037210272.1	2045	Slc11a1	12.5	3.36	7.19e-09	10.7	3.37	0.000753
XR_005091169.1	935	LOC119087660	124.07	2.13	7.66e-09	33.52	0.65	0.65
XM_028871494.2	1927	Ces1f	12.76	3.25	9.18e-09	11.63	1.82	0.42
XM_028859848.2	1128	Cd53	191.22	1.8	9.27e-09	91.33	1.26	0.02
XM_028856401.2	2602	Myd88	105.95	1.81	9.58e-09	56.84	0.89	0.2
XM_028889719.2	1380	Ubald2	70.36	1.55	1.06e-08	46.76	1.66	0.000505
XM_028871500.2	3578	Lpcat2	42.82	1.78	1.07e-08	30.38	0.42	0.72
XM_028861279.2	6609	Pdxk	20.35	1.73	1.1e-08	13.96	1.41	0.00989
XM_028859792.2	13343	Lyst	40.32	1.9	1.13e-08	20.34	0.34	0.83
XM_028855518.1	3137	Rnf41	14.58	2.11	1.2e-08	12.01	2	0.000319
XM_037197012.1	4009	Pde2a	114.08	2.23	1.28e-08	49.15	0.04	0.98
XM_028874470.2	995	Prr13	81.75	1.84	1.3e-08	42.62	0.63	0.42
XM_028892501.2	2984	Pml	23.27	1.94	1.32e-08	23.43	2.14	1.13e-05
XM_028886974.2	3344	Pfkfb4	40.45	1.92	1.32e-08	25.65	0.83	0.38
XM_028892933.2	2162	Cd38	72.44	1.76	1.34e-08	47.85	1.4	0.00594
XM_028894103.2	2544	Nrros	64.05	1.94	1.36e-08	29.39	0.72	0.32
XM_028868425.2	1471	Ada	42.13	2.18	1.39e-08	27.42	1.21	0.03
XM_028886546.2	2446	B4galt6	20.49	2.22	1.4e-08	11.69	0.17	0.93
XM_037209373.1	1001	Basp1	14.64	3.28	1.47e-08	15	2.3	0.01
XM_028876076.2	2009	Max	144.52	1.83	1.53e-08	88.8	0.59	0.59
XM_037208385.1	3604	Lcp1	759.83	1.92	1.61e-08	281.83	0.24	0.87
XM_028861564.2	1987	Trim30a	30.58	1.74	1.67e-08	13.19	1.02	0.13
XM_028870926.2	1759	Grina	165.7	1.93	1.75e-08	120.9	1.88	0.0002
XM_028891603.2	1645	Serpinb10	184.57	2.14	1.77e-08	142.85	1.43	0.01
XM_028895327.2	2426	Parp3	22.94	2.13	1.77e-08	21.72	2.22	0.000633
XM_028893737.2	3792	Rsad2	74.61	2.37	1.86e-08	46.21	0.97	0.36
XM_028888440.2	1372	Mapk13	27.44	2.23	1.86e-08	15.4	0.82	0.52
XM_028860839.2	1438	Selplg	381.32	1.91	1.99e-08	201.4	0.41	0.77
XM_028860921.2	2671	Tec	25.34	1.85	2.21e-08	12.35	1.1	0.04
XM_028860089.2	651	Fcer1g	988.85	1.9	2.26e-08	483.6	0.93	0.23
XM_037196870.1	3238	Txnrd1	30.85	1.77	2.63e-08	22.85	1.66	0.000433
XM_028874782.2	4763	Usp25	49.1	1.79	2.86e-08	26.31	1.28	0.02
XM_028883622.2	3002	Ckap4	63.09	1.9	2.9e-08	39.68	0.42	0.76
XM_028876296.2	2198	Ugt1a7c	30.52	2.08	2.97e-08	25.65	1.27	0.09
XM_037207142.1	2703	Gbp1	15.34	2.03	3.05e-08	26.98	2.4	0.000201
XM_037201333.1	2564	Dhx58	27.52	2.34	3.21e-08	14.82	1.6	0.01
XM_028892918.2	915	LOC114709218	31.5	2.2	3.22e-08	11.04	0.51	0.79
XM_028856793.2	2860	Nek6	20.72	2.37	3.23e-08	21.66	1.95	3.61e-05
XM_028856766.2	852	Tspo	62.81	2.15	3.36e-08	44.23	0.06	0.97
XM_028891750.2	4725	Pik3cg	29.58	2.18	3.65e-08	15.45	0.6	0.54
XM_028884223.2	1034	Mrpl16	43.57	1.85	3.65e-08	32.37	1.38	0.03
XM_028876606.2	1823	Chit1	98.95	1.93	3.99e-08	58.17	1.46	0.0088
XM_028878737.2	2908	Slc28a2	62.78	2.32	4.17e-08	225.92	3.74	2.1e-07
XM_037210992.1	397	Mt1	25.5	5.27	4.32e-08	221.69	7.59	1.82e-24
XR_005091630.1	2598	Adgre5	21.66	1.98	4.34e-08	12.9	0.83	0.29
XM_028862143.2	4900	Cr2	13.3	-1.68	4.54e-08	10.75	-1.5	0.02
XR_005090092.1	526	LOC119086747	27.92	3.04	4.75e-08	17.3	2.07	0.04
XM_028891125.2	3300	Net1	79.28	2.66	4.95e-08	37.39	2.39	1.45e-06
XM_028894336.2	3189	Lyn	77.98	1.78	4.96e-08	47.02	0.84	0.25
XM_037209842.1	4417	LOC114684244	78.59	1.9	5.02e-08	22.05	1.08	0.13
XM_028877112.2	1784	Il10rb	69.06	1.75	5.16e-08	30.72	0.81	0.17
XM_028863405.1	1921	Macroh2a1	64.81	1.63	6.28e-08	28.55	0.7	0.32
XM_028881868.2	4390	Rin2	11.38	2.06	6.55e-08	10.56	1.89	0.000875
XM_037210470.1	632	LOC114682487	190.76	-1.78	6.91e-08	88.6	-0.21	0.87
XM_028876199.2	3222	Sp100	74.47	1.8	7.87e-08	39.37	0.09	0.95
XM_028890578.2	916	LOC114707745	290.93	-2.21	8.12e-08	357.7	-0.49	0.83
XM_037203913.1	4516	Iqsec1	30.75	1.74	9.44e-08	13.69	0.81	0.23
XM_028854790.2	2219	Oas1	40.89	2.34	9.63e-08	63.54	2.99	3.69e-07
XM_028862633.2	802	Clec4a4	40.62	3.01	1.02e-07	24.35	2.02	0.00705
XR_005089822.1	1814	Pilrb2	47.07	1.91	1.04e-07	35.41	0.91	0.3
XM_028867580.2	2950	Bhlhe40	34.38	1.87	1.16e-07	23.74	1.42	0.00259
XM_028889718.2	3571	Rhbdf2	29.84	1.79	1.18e-07	16.6	0.75	0.29
XM_028881360.2	3299	Tfe3	18.53	1.79	1.18e-07	15.53	1.39	0.01
XM_028876971.2	1929	Acsl4	33.47	2.09	1.44e-07	21.26	1.48	0.01
XM_028885566.2	2210	Sephs2	41.47	1.64	1.44e-07	35.55	1.86	0.000381
XM_037207645.1	2011	St3gal4	52.47	1.57	1.44e-07	22.06	0.98	0.12
XM_028867903.2	3465	Il4r	71.67	1.78	1.5e-07	47.51	1.62	0.00221
XM_028856428.2	1073	Gng10	37.58	2.14	1.57e-07	19.77	0.75	0.51
XM_028869109.2	3455	Lasp1	144.99	1.74	1.57e-07	100	1.13	0.1
XM_028865965.2	3494	Tbc1d2b	32.42	1.81	1.6e-07	13.45	0.13	0.92
XM_028882800.2	3641	Tdrd7	18.42	1.69	1.83e-07	11.24	0.79	0.21
XM_028864259.2	1733	Nipal1	18.75	-1.98	2.19e-07	16.91	-2.59	3.5e-05
XM_028874225.2	691	Snrpd3	13.46	5.2	2.25e-07	15.13	0.98	0.71
XM_037211364.1	4157	Ptprc	25.53	-1.73	2.34e-07	23.23	-0.66	0.64
XM_028856266.2	1470	Ctss	444.82	1.75	2.38e-07	249.06	1.03	0.15
XM_028861273.2	2614	Stx11	42.95	1.78	2.43e-07	57.8	1.9	0.00012
XM_028867672.2	4622	Rnf144b	32.84	2.07	2.5e-07	17.66	1.35	0.03
XM_028858147.2	997	Gzmb	82.81	2.6	2.67e-07	20.07	1.79	0.05
XM_028853756.2	4952	Ccdc88b	29.45	1.69	2.96e-07	18.65	0.78	0.31
XM_028878709.1	1960	Pdia3	239.08	1.77	3.13e-07	174.05	1.32	0.03
XM_037201835.1	3770	Lilrb3a	509.33	1.9	3.37e-07	223.7	0.82	0.36
XM_037198349.1	1795	Pilrb2	62.53	1.64	3.38e-07	63.48	0.72	0.52
XM_028888361.2	2867	Fkbp5	23.28	2.14	3.47e-07	16.87	2.35	7.73e-06
XM_037202232.1	1499	Nlrp12	27.51	2.42	3.49e-07	11.48	-0.88	0.5
XM_028858994.2	3338	Capn2	35.66	-1.58	3.54e-07	42.96	-1.24	0.03
XM_028862653.2	2679	Dtx3l	59.01	1.66	3.7e-07	31.55	1.04	0.09
XM_028879067.1	2080	St3gal4	23.71	2.13	3.87e-07	23.38	1.23	0.06
XM_028861561.2	1879	Trim30a	26.75	1.71	3.89e-07	14.25	1.27	0.03
XM_028892100.2	1648	Irf9	31.53	2.06	4.2e-07	21.7	1.23	0.07
XM_037201163.1	522	Havcr1	40.8	2.71	4.28e-07	159.3	3.53	4.97e-05
XM_028892101.2	1941	Irf9	46.18	1.55	4.34e-07	35.57	1.34	0.00615
XM_028868262.2	2150	Gpr183	32.39	-1.54	4.67e-07	36.55	-1.2	0.02
XM_028892930.2	2884	LOC114709222	59.13	1.66	4.75e-07	29.12	0.57	0.56
XM_028875191.2	3314	Bcl6	35.48	1.6	5.48e-07	16.25	0.4	0.68
XM_037199474.1	1896	B3galt4	17.64	2.01	5.57e-07	11.02	0.73	0.49
XM_028873525.1	1497	Rnase4	26.11	-2.08	5.57e-07	48.61	-1.17	0.19
XM_028874400.2	4346	Itga5	49.2	1.78	5.72e-07	25.56	0.79	0.3
XM_037209780.1	7097	Parp14	80.52	1.65	5.85e-07	44.91	1.01	0.15
XM_028872537.2	1493	Acp5	63.09	-1.58	6.32e-07	75.1	-0.96	0.14
XM_037202154.1	2685	Lilra5	72.45	1.85	6.36e-07	33.63	0.14	0.93
XM_028860425.2	5587	Trpm2	50.7	1.68	6.39e-07	28.44	-0.5	0.69
XM_028894899.2	4204	Lcp2	60.6	1.6	6.54e-07	28.85	0.7	0.38
XM_028874633.2	3188	Slc5a6	10.14	2.29	6.86e-07	21.44	2.62	3.31e-05
XM_028855439.2	4696	Stat2	70.27	1.61	7.07e-07	43.6	0.93	0.2
XM_037207696.1	4735	Ldlr	36.63	1.93	8.1e-07	27.43	1.23	0.04
XM_028863506.2	3091	Nlrp12	38.02	2.32	8.25e-07	16.49	-0.73	0.51
XM_028868848.2	1744	Agpat2	18.66	2.05	8.34e-07	12.15	1.18	0.15
XM_028865956.2	1417	Ctsh	225.84	1.76	8.52e-07	129.91	0.65	0.5
XM_028868842.2	1275	Cd302	37.99	1.81	9.66e-07	40.31	1.55	0.03
XM_028886072.2	2523	Hspa5	298.85	1.62	9.75e-07	153.4	0.99	0.14
XM_028890701.2	1877	Pla2g7	173.94	1.81	9.9e-07	100.46	0.9	0.26
XM_028874065.2	3558	Emilin2	46.32	1.79	1.01e-06	72.46	1.92	0.00704
XM_028854666.2	1092	Tpsb2	19.4	3.46	1.05e-06	27.15	3.23	4.51e-05
XM_028862627.2	884	Clec4d	97.45	1.66	1.06e-06	43.95	0.69	0.44
XM_028890900.2	5876	Adar	28.36	1.53	1.08e-06	15.68	0.74	0.29
XM_028877411.2	2147	Stx7	53.51	1.91	1.13e-06	25.76	1.64	0.03
XM_028892598.2	4761	Cyfip1	47.98	1.79	1.16e-06	26.5	0.91	0.17
XM_028858602.1	2818	Pygl	157.43	1.74	1.22e-06	118.07	0.87	0.27
XM_028874657.2	5604	Slk	23.89	1.59	1.31e-06	16.27	1.14	0.07
XM_028881317.2	3077	Ripk1	21.7	1.47	1.4e-06	11.96	0.9	0.13
XM_028887956.2	1186	LOC114705843	447.48	-1.76	1.4e-06	572.4	-1.04	0.18
XM_028883695.2	1942	Pld4	18.18	-2.44	1.4e-06	30.07	-1.5	0.00503
XM_037197025.1	5333	Arap1	33.88	1.67	1.42e-06	17.69	0.44	0.71
XM_028875541.2	4178	Nt5e	13.53	1.92	1.47e-06	35.41	4.13	9.47e-11
XM_028868424.2	1474	Ada	35.78	1.94	1.53e-06	25.65	1.37	0.01
XM_028888056.2	1202	H2-Ea	506.36	-1.79	1.54e-06	571.2	-1.17	0.09
XM_028882123.2	1807	Lilrb3	996.85	1.77	1.57e-06	437.17	0.54	0.64
XM_028874471.2	994	Prr13	43.88	1.76	1.73e-06	29.36	0.7	0.45
XM_037210252.1	1491	Tuba4a	86.8	1.54	1.75e-06	72.71	1.49	0.00279
XM_028889473.2	3173	Rara	15.99	1.86	1.81e-06	11.12	0.79	0.31
XM_028874893.2	1139	Ostf1	222.83	1.61	1.93e-06	198.85	1.12	0.1
XM_028874472.2	1254	Prr13	38.08	1.74	1.94e-06	18.37	0.03	0.98
XM_028888176.2	3106	Rps6ka1	65.95	1.62	1.94e-06	29.87	0.6	0.45
XM_028863284.2	2197	Treml2	62.61	1.55	2.01e-06	29.05	0.37	0.75
XM_028861028.2	1434	H2-Ma	74.27	-1.88	2.01e-06	88.38	-1.81	0.000218
XM_028866914.2	2504	Wsb1	35.04	1.54	2.06e-06	18.84	0.83	0.23
XM_028877801.2	3226	Gramd1a	13.92	2.17	2.17e-06	13.53	2.32	5.4e-05
XM_037199255.1	6878	Dock11	11.2	-1.46	2.25e-06	11.65	-2.01	5.12e-06
XM_028886842.2	1810	Sting1	250.26	1.53	2.28e-06	126.9	0.55	0.56
XM_028855388.2	2729	Gbp4	15.74	1.8	2.51e-06	17.41	1.4	0.03
XM_028863530.2	1220	H2-Ab1	167.99	-1.72	2.57e-06	213.13	-1.24	0.05
XM_028862990.2	1552	Serpina3n	15.68	1.99	2.6e-06	11.96	1.93	0.0084
XM_028867976.2	2870	Chp1	98.11	1.51	2.61e-06	67.68	1.04	0.14
XM_028858198.2	1325	LOC114683839	54.08	1.6	2.94e-06	30.53	0.19	0.89
XM_028867471.2	2687	Cd47	49.8	1.37	2.94e-06	30.09	0.46	0.64
XM_037206061.1	3284	Man2b1	65.6	1.65	2.98e-06	39.44	1.05	0.09
XM_028887939.2	1141	LOC114705822	569.22	-1.71	3.07e-06	670.2	-0.98	0.24
XM_028875567.2	1744	Ccdc152	16.69	-2.04	3.18e-06	14.48	-2.03	0.00183
XM_028889388.2	2171	Entpd1	37.74	1.68	3.21e-06	18.03	0.24	0.84
XM_037201655.1	5468	Ciita	15.96	-1.85	3.23e-06	17.35	-2.81	3.68e-08
XM_028873986.2	3344	Rab31	44.59	1.64	3.31e-06	26.62	0.31	0.83
XM_028861094.2	4343	Wdr26	86.58	1.68	3.54e-06	60.09	1.21	0.08
XM_028858613.2	9956	Nin	20.73	1.59	3.65e-06	13.41	0.5	0.66
XM_028858071.2	4702	Hif1a	15.9	1.65	3.93e-06	16.72	2.63	1.61e-06
XM_028861570.2	2492	Trim34a	62.96	1.76	4.06e-06	34.08	-0.1	0.94
XM_037202216.1	2389	Lilrb3	60.64	1.76	4.07e-06	26.89	0.35	0.74
XM_028873470.2	2420	Prcp	39.3	-1.36	4.1e-06	42.48	-1.03	0.09
XM_028865223.2	4072	Ifih1	33.16	1.58	4.15e-06	15.95	1.06	0.07
XM_028867399.2	4015	Tmed5	45.15	1.45	4.16e-06	26	1.04	0.09
XM_028883764.2	3292	Tnfaip2	14.3	2.27	4.21e-06	26.13	2.3	0.000316
XM_037199606.1	1875	Ccnd3	38.65	1.33	4.21e-06	23	0.57	0.48
XM_028857369.2	2265	Ube2d3	40.79	1.37	4.29e-06	34.94	1.24	0.03
XM_028890427.2	3175	Abhd5	17.63	1.67	4.32e-06	13.25	1.29	0.03
XM_028872539.2	1360	Acp5	50.45	-1.88	4.35e-06	45.59	-1.88	0.00405
XM_028878765.2	1335	Oas1a	260.61	2.25	4.37e-06	89.25	0.91	0.35
XM_028865312.2	1267	Cd79b	230.45	-1.71	4.86e-06	267.69	-1.18	0.18
XM_028857840.2	1777	Apobec1	25.5	2	4.99e-06	14.33	0.06	0.97
XM_028862659.2	1684	LOC114688035	1783.98	1.7	5.02e-06	816.07	0.52	0.66
XM_028856533.2	878	Ly86	51.2	-1.83	5.03e-06	51.07	-1.11	0.11
XM_037206740.1	1889	Fcrl1	37.32	-1.48	5.06e-06	37.42	-1.31	0.05
XM_028876195.2	972	Sp100	37.88	1.71	5.13e-06	20.4	0.42	0.8
XM_028887537.1	2557	Bcl2l1	19.78	2.26	5.29e-06	15.74	1.85	0.000216
XM_028892854.2	4620	Ttc7a	17.05	-1.39	5.33e-06	20.8	-1.71	0.000162
XM_028875055.2	2901	Add3	18.92	-1.84	5.42e-06	18.8	-3.66	3.82e-14
XM_037200972.1	17143	Rnf213	39.27	2	5.51e-06	19.44	1.33	0.08
XM_028876487.2	2395	Lax1	27.92	-1.46	5.59e-06	23.61	-2	0.00149
XM_028868319.2	2139	Rnf146	33.28	1.36	5.95e-06	16.9	0.78	0.25
XM_028866776.2	1236	Rflnb	76.28	1.41	5.96e-06	47.67	-0.41	0.7
XR_005090728.1	3216	Pilra	51.04	1.51	6.13e-06	29.81	0.32	0.83
XM_028893871.2	2199	Relb	15.83	1.91	6.42e-06	23.63	2.82	1.12e-08
XM_028878664.2	1226	LOC114699570	35.38	2.56	6.59e-06	24.32	1.13	0.19
XM_028857172.2	3900	Nlrp3	37.86	1.84	6.81e-06	37.17	1.6	0.04
XM_028867461.2	2164	Dipk1a	26.07	-1.61	6.89e-06	26.55	-2.02	1.7e-05
XM_028876569.2	2716	Ppp1r15b	32.74	1.64	7.21e-06	29.66	1.86	0.000292
XM_037205690.1	1713	LOC114688930	73.46	1.51	7.29e-06	36.6	0.25	0.83
XM_037202608.1	4426	Fkbp15	14.72	1.43	7.31e-06	10.68	0.76	0.29
XM_028890108.2	1831	Smim3	16.83	2.35	7.59e-06	23.36	2.93	1.52e-06
XM_037197975.1	4231	Furin	49.15	1.57	7.89e-06	33.58	1.17	0.05
XM_028875566.2	1236	Selenop	69.73	-1.55	8.13e-06	124.65	-2.36	1.52e-06
XM_028888274.2	3525	Rin3	91.17	1.54	8.51e-06	59.72	0.54	0.6
XM_028863796.2	3558	Syk	38.62	2	9.57e-06	17.59	0.89	0.32
XM_028861207.2	3248	Adgre1	99.32	1.75	1.01e-05	67.14	0.53	0.62
XM_028854151.2	10191	Vcan	27	1.89	1.14e-05	28.71	2	0.00832
XM_028862833.2	3078	Adgre5	338.7	1.67	1.26e-05	217.11	1.08	0.14
XM_028875596.2	4788	Fyb1	147.8	1.49	1.37e-05	63.8	0.58	0.56
XM_028854964.2	2460	Tspan14	61.98	1.75	1.41e-05	36.12	0.59	0.56
XM_028868311.2	1118	Ptma	28.83	3.56	1.42e-05	37.24	-1.08	0.59
XM_028862834.2	2931	Adgre5	30.68	1.6	1.43e-05	23.03	0.81	0.33
XM_028887934.2	1195	LOC114705818	212.96	-1.65	1.45e-05	264.27	-0.95	0.21
XM_028881361.2	3233	Tfe3	17.47	1.57	1.48e-05	16.41	1.23	0.05
XM_028856360.2	2358	Crlf2	27.83	1.51	1.48e-05	24.21	0.94	0.15
XM_028884166.2	1954	Ctsb	321.98	1.51	1.49e-05	257.26	1.29	0.07
XM_028868977.2	3476	Xylt2	15.93	-1.71	1.53e-05	16.48	-2.78	2.59e-10
XM_037201406.1	2522	Tnip1	20.41	1.73	1.56e-05	14.89	0.98	0.23
XM_028857418.1	3627	Nfkb1	75.06	1.47	1.58e-05	83.83	1.87	0.000791
XM_037199815.1	4288	Vsir	34.37	1.93	1.6e-05	14.68	-0.03	0.99
XM_028876516.1	4656	Slc41a1	24.46	1.34	1.6e-05	14.9	0.86	0.13
XM_028875051.2	4280	Add3	72.04	-1.4	1.63e-05	62.48	-1.68	0.00215
XM_028880114.2	1357	C6H4orf46	24.82	-1.6	1.67e-05	21.48	-1.01	0.19
XM_028860481.2	1975	Cd1d	10.02	-2.34	1.68e-05	11.26	-2.43	0.03
XM_028865941.2	1403	Anxa2	642.41	1.59	1.74e-05	414.95	0.67	0.48
XM_028880653.2	2310	Padi4	61.35	1.47	1.74e-05	48.95	0.44	0.7
XM_037198649.1	831	Tesc	12.44	4.42	1.79e-05	27.48	0.5	0.78
XM_037210462.1	2868	Mvp	81.43	1.53	1.86e-05	62.56	1.04	0.12
XM_028893862.2	2315	Vasp	28.49	-4.49	1.86e-05	14.7	0.68	0.84
XM_028872814.2	3837	Chsy1	19.57	1.22	2.05e-05	14.37	1.09	0.03
XM_028876450.2	2441	Zyx	121.67	1.61	2.06e-05	96.08	0.49	0.68
XM_028891009.2	1445	Upp1	20.19	3.89	2.13e-05	21.63	2.53	0.000632
XM_037211246.1	4171	Arhgap30	22.28	1.4	2.22e-05	18.17	-0.26	0.83
XM_037201870.1	1913	LOC114689440	19.38	-1.56	2.22e-05	22.34	-2.24	1.03e-05
XM_028880668.2	2576	Efhd2	120.68	1.5	2.28e-05	74.49	0.65	0.51
XM_028853687.2	2852	Rtn3	42.86	1.39	2.37e-05	32.29	0.97	0.1
XM_028862383.2	854	Sri	172.36	1.37	2.43e-05	103.09	0.61	0.48
XM_037205919.1	1654	LOC114685833	25.88	-1.52	2.51e-05	18.76	-1.25	0.14
XM_028870335.2	953	Ctsb	204.17	1.46	2.6e-05	143.57	1.18	0.08
XM_028879921.2	2443	Mx2	203.16	1.88	2.69e-05	119.07	1.36	0.11
XM_028857674.2	1563	Irf2	87.29	1.31	3.04e-05	44.93	0.73	0.24
XM_037209479.1	4939	Fcho2	20.51	1.37	3.06e-05	11.68	0.4	0.72
XM_028872166.2	2297	Plbd1	84.47	1.45	3.22e-05	53	0.23	0.88
XM_028875063.2	2474	Dusp5	16.11	1.58	3.28e-05	10.95	0.3	0.82
XM_028853858.2	2687	Traf7	26.96	1.28	3.3e-05	16.81	1.07	0.08
XM_028861210.2	2897	Vav1	125.59	1.36	3.4e-05	71.81	0.43	0.7
XM_037203327.1	6059	Abca1	14.83	1.48	3.41e-05	11.3	1.77	0.009
XM_037205106.1	2789	LOC114697520	20.31	-1.65	3.41e-05	14.61	-1.47	0.05
XM_028886817.2	2926	Lilrb3	18.43	1.72	3.43e-05	10.15	0.16	0.91
XM_028864498.2	1779	Sell	779.05	1.53	3.43e-05	388.53	-0.06	0.97
XM_028859122.2	3629	Samd4b	16.38	1.31	3.43e-05	13.74	1.3	0.02
XM_028861714.2	3396	Ppp1r18	64.64	1.42	3.68e-05	40.29	0.88	0.22
XM_028879084.2	5611	St8sia4	20.67	-1.22	3.7e-05	17.81	-0.9	0.1
XM_037201984.1	3219	Rasgrp1	16.7	-1.47	3.7e-05	18.08	-1.86	0.00091
XM_028860703.2	3882	Evi5l	20.13	-1.52	3.74e-05	20.21	-1.91	8.2e-06
XM_028892796.2	2779	Rhoq	25.92	1.36	3.85e-05	26.14	1.86	0.000983
XM_028887297.2	6832	Dock11	15.24	-1.24	3.92e-05	14.14	-1.17	0.04
XM_028892346.2	2347	Ptpn6	275.36	1.44	4e-05	174.74	1	0.16
XM_028856577.2	1169	Tifa	46.5	1.56	4.06e-05	35.17	2.03	5.86e-05
XM_028861651.2	1868	LOC114686954	73	1.4	4.11e-05	49.31	-0.33	0.77
XM_028888459.2	2451	G6pd	127.29	1.4	4.17e-05	103.51	-0.07	0.97
XM_028887941.2	1129	LOC114705823	450.97	-1.52	4.2e-05	506.39	-0.73	0.47
XM_028885647.2	3765	LOC114704404	95.62	1.6	4.29e-05	110.87	1.23	0.12
XM_028892317.2	1199	Cd9	253.96	1.59	4.37e-05	154.67	1.29	0.03
XM_028870782.2	3862	Mxd4	22.87	-1.2	4.49e-05	24.39	-1.63	0.000124
XM_028890086.2	1440	Cd74	523.81	-1.35	4.52e-05	623.05	-0.96	0.2
XM_028861014.2	3077	Tap1	59.02	1.38	4.57e-05	38.39	1.04	0.09
XM_037200864.1	1044	Prss29	11.67	3.83	4.58e-05	17.56	3.99	9.48e-07
XM_028885211.2	1874	Rgs19	20.47	1.56	4.84e-05	13.41	0.39	0.78
XM_028880022.2	2709	Tnip1	44.42	1.5	4.84e-05	40.53	0.28	0.93
XM_028876855.2	4318	Prkacb	39.66	-1.25	5.02e-05	37.47	-1.51	0.00372
XM_037211440.1	2453	Fcmr	134.3	-1.44	5.06e-05	144.97	-1.93	0.00149
XM_028887957.2	1548	LOC114705846	613.06	1.49	5.26e-05	411.77	1.05	0.13
XM_028861559.2	1933	Trim30a	54.42	1.46	5.52e-05	46.65	1.27	0.03
XM_028874578.2	2293	Atf1	29.91	1.24	5.59e-05	20.4	0.88	0.2
XM_028885171.2	2633	Cpne3	47.81	1.36	5.6e-05	23.41	-0.22	0.88
XM_028875576.2	3451	Oxct1	13.75	-1.49	5.63e-05	12.8	-0.94	0.14
XM_028858167.1	2391	Smpd1	37.7	1.33	5.97e-05	27.61	0.6	0.51
XM_028875467.2	2565	Ldlrap1	15.15	-1.52	5.97e-05	22.72	-2.09	9.77e-06
XM_028884212.2	5043	Dtx4	14.09	-1.35	6.06e-05	14.54	-1.54	0.00472
XM_028859789.2	4859	Slc38a2	37.17	1.29	6.21e-05	21.48	0.85	0.2
XM_028857764.2	4307	Abca1	16.42	1.3	6.26e-05	13.9	1.98	0.00109
XM_028893335.2	2373	Nsg2	68.83	-1.29	6.31e-05	55.5	-1.58	0.00428
XM_037197585.1	1298	Eed	11.41	2.1	6.57e-05	10.09	1.69	0.05
XM_028888858.2	2646	Osbpl9	53.57	1.28	6.74e-05	26.87	0.67	0.37
XM_028870923.2	3421	Parp10	30	1.31	6.82e-05	18.88	0.97	0.08
XM_028871097.2	1811	Mfng	12.91	-2.1	7.12e-05	11.44	-2.5	0.000637
XM_037199455.1	1269	Sat1	40.26	1.36	7.46e-05	22.39	0.55	0.53
XM_028873993.2	6481	Man2a1	18.51	-1.21	7.68e-05	19.31	-0.93	0.13
XM_028888040.2	1153	Clic1	495.84	1.38	8.07e-05	307.95	0.5	0.63
XM_037207457.1	2325	Pkm	18.96	1.62	8.18e-05	11.98	0.75	0.5
XM_028856869.2	1092	Ifi35	140.2	1.46	8.36e-05	90.15	1.08	0.07
XM_028890257.2	2255	Sesn1	24.37	-1.4	8.4e-05	22.85	-1.86	0.000102
XM_028892424.2	3585	Ergic2	15.51	1.31	8.68e-05	10.55	1.3	0.00855
XM_028877669.2	4215	Trib2	17.6	-1.23	8.76e-05	20.82	-1.99	9.8e-06
XM_028856555.2	3741	Pxn	49.25	1.31	8.77e-05	37.35	0.17	0.91
XM_028856909.1	1713	Hadh	17.72	-1.7	9.62e-05	17.44	-2.05	0.000592
XM_028876029.2	2070	Sptlc2	34.83	1.36	9.9e-05	18.48	0.85	0.19
XM_028856303.2	3243	S1pr1	76.12	-1.36	9.9e-05	68.39	-1.44	0.01
XM_037202161.1	2753	Lilra3	70.71	1.53	0.000101	36.22	-0.53	0.64
XM_037210782.1	4142	Xpo6	16.75	1.35	0.000102	12.53	0.02	0.99
XM_037209849.1	867	LOC114687105	79.86	-1.39	0.000102	85.09	-1.33	0.01
XM_028859249.2	1367	Nfkbib	24.37	1.54	0.000105	25.89	1.62	0.000729
XM_028878521.2	1155	Epsti1	52.97	1.63	0.000107	28.3	0.8	0.34
XM_028871737.2	2240	Unc93b1	95.27	1.48	0.000107	66.21	0.59	0.55
XM_037199756.1	1398	LOC114686366	69.12	1.34	0.000108	44.1	0.81	0.23
XM_028860583.2	2985	Ccr1	30.74	1.5	0.00011	13.2	0.61	0.44
XM_028873576.2	1033	Lgals3	169.12	1.39	0.00011	126.95	0.22	0.88
XM_028877703.2	4017	Adam17	51.66	1.27	0.000115	36.03	0.95	0.2
XM_028883418.2	2337	Kctd12	13.47	1.75	0.000117	18.27	2.39	0.000777
XM_028857340.2	5930	Arhgef18	50.86	-1.38	0.000121	57.45	-2.29	4.11e-05
XM_037200175.1	1240	H2-Ob	48.59	-1.72	0.000122	55.16	-2.16	0.000447
XM_028866905.2	1490	Lgals9	39.07	1.9	0.000124	25.35	1.36	0.06
XM_028855940.2	2392	Pola2	13.15	1.46	0.000126	17.38	2.11	0.000164
XM_037206074.1	2718	Snx20	15.35	1.75	0.000129	13.88	1.38	0.07
XM_028870367.2	5769	Spata13	38.55	1.37	0.000132	18.52	-0.25	0.84
XM_028855872.2	5887	Ehbp1l1	44.63	1.3	0.000132	26.84	0.04	0.98
XM_028856225.2	510	LOC114682374	30.19	-4.68	0.000135	66.56	-0.67	0.64
XM_028864120.2	5100	Znrf2	22.09	-1.16	0.000149	17.86	-0.83	0.12
XM_028892472.2	2223	Pkm	350.67	1.39	0.000151	284.99	0.9	0.28
XM_028876207.2	1990	Itm2c	27.1	-1.42	0.000151	34.46	-1.55	0.00376
XM_028873420.2	2205	Eed	20.3	1.41	0.000153	12.44	1.41	0.01
XM_028855662.2	1723	Oas1a	47.21	1.73	0.000155	30.46	0.69	0.47
XM_028889303.2	2001	Tbxas1	33.81	1.44	0.000156	25.01	1.17	0.02
XM_037208010.1	3323	Cmtm6	156.68	1.31	0.000156	89.22	0.53	0.57
XR_005091834.1	1743	LOC119088214	41.57	2.53	0.000157	25.86	-1.36	0.19
XM_028870604.2	1812	Xbp1	61.75	1.21	0.000168	58.54	1.52	0.00204
XM_028884486.2	4174	Rnf19a	21.07	1.14	0.000169	12.28	0.77	0.17
XM_028886358.2	2769	Umps	16.05	1.47	0.00017	10.61	1.33	0.02
XM_028881176.1	1358	Slc25a4	43.44	-1.4	0.000179	40.72	-0.39	0.72
XM_028894335.2	3252	Lyn	90.74	1.34	0.000187	67.14	1	0.14
XM_028860275.1	1629	Ldha	409.72	1.38	0.000189	251.36	0.86	0.27
XM_028884620.2	1361	Rgs2	110.26	1.71	0.000194	54.74	-1.45	0.04
XM_028886497.1	2555	Slc2a1	14.33	1.51	0.0002	25.69	2.54	4.54e-07
XM_028879641.2	2497	Pdia4	43.52	1.17	0.0002	33.17	1.05	0.07
XM_028894868.2	4944	Nlrc3	15.38	-1.15	0.0002	14.63	-2.45	2.99e-06
XM_028859175.2	630	Gmfg	429.82	1.26	0.000205	262.9	0.59	0.52
XM_028861027.2	1602	H2-Mb1	60.92	-1.66	0.000205	84.14	-1.9	2.02e-05
XM_028877558.2	2024	LOC114698739	70.96	1.49	0.000206	36.36	-0.01	0.99
XM_028860315.2	793	Dynlt1	79.72	1.31	0.000221	51.33	0.19	0.88
XM_028884827.2	2692	Cd180	11.18	-1.5	0.00023	11.27	-0.93	0.31
XM_028892835.1	4383	Pacs1	30.53	-1.17	0.000233	33.75	-1.71	0.000283
XM_028888608.2	8465	Flna	32.01	1.29	0.000242	22.6	-0.04	0.98
XM_028883834.1	2743	Atp6v1b2	51.84	1.19	0.000243	42.79	1.09	0.09
XM_037209628.1	5275	Hlcs	16.84	1.4	0.000245	10.35	0.51	0.6
XM_028880649.2	5188	Ripor2	68.62	1.38	0.000246	43.23	-0.1	0.95
XM_028890747.2	3829	Zbtb7b	49.44	1.3	0.000248	32.36	0.29	0.83
XM_028869155.2	6374	Plxnb2	10.38	-1.98	0.000248	14.35	-2.61	2.89e-10
XM_037205213.1	2171	Slc20a1	26.53	1.35	0.000249	12.89	1.02	0.1
XM_028876192.2	2285	Sp110	74.69	1.25	0.00026	45.2	0.65	0.37
XM_028882239.2	3696	Smim14	18.06	-1.19	0.00026	19	-0.92	0.11
XM_028891129.2	2262	Scd2	30.08	-1.58	0.000261	29.2	-2.62	1.32e-06
XM_028893861.2	2318	LOC114709870	92.29	4.27	0.00027	68.66	1.34	0.31
XM_028893357.2	3311	Pgap6	20.11	1.41	0.000271	15.67	-0.68	0.53
XM_028864131.2	1419	LOC114689723	43.9	-1.19	0.000276	39.93	-0.07	0.95
XM_037197465.1	3945	Cerk	29.18	-1.31	0.000277	32.59	-2.21	1.45e-06
XM_037202215.1	2020	LOC114688507	59.01	1.41	0.000278	32.7	0.49	0.63
XM_028890541.2	6863	Usp32	31.16	1.36	0.000284	15.73	-0.14	0.93
XM_028862784.2	1509	Tle5	75.19	-1.18	0.000284	83.6	-1.01	0.08
XM_028873201.2	1159	Sat1	228.64	1.35	0.000288	192.17	0.98	0.24
XM_028878205.2	2430	Trim25	30.24	1.15	0.000292	23.72	0.74	0.28
XM_028878766.2	3670	Oas3	41.57	2.11	0.000298	16.22	-0.19	0.91
XM_028874112.2	3878	Agfg1	24.77	1.14	0.0003	16.71	0.73	0.32
XM_028878155.2	2145	Gramd4	15.76	-1.4	0.0003	17.95	-2.82	0.000116
XM_028878732.2	939	B2m	1008.79	1.28	0.000307	672.72	1.17	0.08
XM_028892344.2	2116	Ltbr	18.6	1.43	0.000309	15.4	0.69	0.37
XM_028874401.2	2010	Slc35f6	21.9	1.29	0.000309	16.63	0.48	0.62
XM_028879810.2	1293	Ralb	28.65	1.53	0.000317	26.51	1.11	0.09
XM_037199889.1	1159	Ltb	28.38	1.5	0.000323	16.89	-0.03	0.99
XM_028876473.2	3189	Jdp2	12.3	1.48	0.000333	15.77	2.08	0.0002
XM_037209797.1	2674	Nrros	20.01	1.65	0.000339	12.53	-0.01	1
XM_028895088.2	3230	Fam107b	64.2	1.33	0.000343	37.79	0.85	0.22
XM_028856734.2	1670	Pacsin2	17.11	1.58	0.000344	12.69	0.77	0.38
XM_028876077.2	951	Max	33.85	1.46	0.000347	18.49	-0.21	0.91
XM_028869062.2	4929	Ptpre	14.83	1.1	0.000354	11.99	0.86	0.27
XM_028860147.1	1353	Stard3nl	25.61	1.31	0.000356	16.07	0.97	0.2
XM_028894410.2	2502	LOC114710307	51.58	1.29	0.000377	34.74	0.34	0.81
XM_028888373.2	3358	Ppard	16.52	1.23	0.000378	10.18	0.16	0.91
XM_028893355.2	1937	Dusp1	87.18	1.59	0.000387	165.84	2.66	3.28e-06
XM_028873761.2	2907	Fes	84.4	1.33	0.000387	66.6	-0.06	0.97
XM_028890476.2	2488	Zdhhc3	48.5	1.16	0.000387	32.44	0.63	0.39
XM_028880970.1	6215	Ablim1	39.12	-1.27	0.000389	38.99	-1.43	0.02
XM_028888232.2	457	Ifi27l2a	980.26	1.54	0.00039	659.5	-0.88	0.38
XM_028870213.2	1250	Taldo1	633.82	1.26	0.000402	398.66	0.82	0.31
XM_028884342.2	2556	Ms4a1	83.46	-1.26	0.000402	70.13	-0.09	0.96
XM_028890755.2	885	LOC114707876	26.01	2.35	0.000405	12.24	-0.62	0.72
XM_028861026.2	1064	H2-Oa	28.3	-1.66	0.000406	32.98	-1.74	0.01
XM_037196661.1	2617	Dgka	57.14	-1.36	0.000419	54.79	-2.27	3.71e-05
XM_028855193.2	1293	Capg	304.52	1.4	0.000428	180.76	0.59	0.53
XM_028885659.2	1121	Rgs10	24.17	-1.57	0.00043	24.38	-2.02	0.00497
XM_028871084.2	1406	Rac2	846.72	1.27	0.000436	534.96	0.68	0.47
XM_028864179.2	5884	Fam126a	13.96	-1.08	0.000443	13.56	-1.25	0.00711
XM_028860338.2	918	Fth1	14783	1.42	0.000446	13501.6	1.71	0.00484
XM_028859179.2	507	Gmfg	40.69	1.59	0.00045	21.54	0.84	0.45
XM_028878742.2	1724	Sqor	55.26	1.58	0.00045	48.04	0.83	0.33
XM_028870393.2	1649	Phf11	94.58	1.18	0.000453	56.58	0.85	0.18
XM_028887334.2	413	Rpl39	597.24	-1.19	0.00046	660.13	-0.3	0.83
XM_037208386.1	3413	Lcp1	94.61	1.82	0.000464	157.56	1.23	0.19
XM_037208721.1	10100	Wdfy4	25.43	1.24	0.000467	20.65	0.87	0.27
XM_028876305.2	3968	Arl4c	30.98	-1.17	0.000475	31.14	-2.54	2.57e-07
XM_037209819.1	4070	St6gal1	13.3	-1.21	0.000483	13.92	-2.08	0.02
XM_028876143.2	3916	Susd6	46.51	1.22	0.000503	36.52	1.03	0.16
XM_028894350.2	7891	Gvin1	35.51	1.47	0.000509	12.21	-0.11	0.95
XM_028890087.2	1241	Cd74	1481.9	-1.36	0.000528	2041.05	-0.78	0.39
XM_037200745.1	1796	Pdia3	64.4	1.47	0.000535	23.23	1.05	0.16
XM_028855702.2	7083	Plxnc1	17.67	1.38	0.000537	14.86	0.16	0.91
XM_028857446.2	5223	Snx27	13.57	1.15	0.000545	11.22	0.79	0.17
XM_028891489.2	2905	Gnb1	11.7	1.37	0.000559	10.11	1.04	0.28
XM_037210754.1	2087	Cd19	23.76	-1.29	0.000565	24.96	-1.13	0.13
XM_028872065.2	1881	Btla	24.06	-1.33	0.000571	22.62	-1.73	0.0071
XM_028874723.2	2881	Pla2g4a	14.13	1.36	0.000583	30.64	1.55	0.08
XM_037202925.1	3206	Csf3r	15.53	1.79	0.000589	10.96	-0.72	0.68
XM_028878768.2	3468	Oas2	23.08	2.58	0.000599	10.28	-0.17	0.94
XM_028891743.2	2650	Nampt	44.71	1.13	0.000612	35.54	1.39	0.00561
XM_028855494.2	910	Cd63	100.83	1.07	0.000623	102.49	0.95	0.17
XM_028880639.2	4570	Wipf1	28.76	1.16	0.00063	17.52	-0.36	0.77
XM_028872901.2	3012	Snn	40.45	-1.15	0.000644	36.65	-1.12	0.06
XM_028862782.1	3348	Gna11	14.57	1.25	0.000648	10.85	0.97	0.12
XM_028892648.2	3068	Tmem268	23.25	2.68	0.000664	14.56	1.8	0.00522
XM_028854719.2	2145	Cx3cr1	14.7	-1.85	0.000671	26.8	-3.94	2.19e-12
XM_028874665.2	2089	Calhm2	10.88	-1.65	0.000679	12.59	-2.36	0.000687
XM_028861005.2	1649	LOC114686342	29.92	-1.65	0.000727	34.84	-2.34	9.63e-05
XM_037201486.1	4273	Adam19	63.41	1.35	0.000728	40.7	0.01	0.99
XM_037208430.1	2940	Adamdec1	119.56	-1.75	0.000733	142.6	-3.52	3.43e-09
XM_028875816.2	519	Rpl22l1	107.16	-1.22	0.00074	78.7	-0.36	0.75
XM_037198153.1	2777	Trib2	13.6	-1.39	0.000741	11.87	-1.17	0.35
XM_037211796.1	1849	Rab8a	34.32	1.22	0.000759	23.54	-0.05	0.97
XM_028868168.2	3662	Ankh	19.96	-1.1	0.000759	18.14	-0.06	0.96
XM_028869569.2	2747	Adam8	13.71	1.59	0.000775	12.37	-0.73	0.46
XM_028877974.2	2668	Rab21	36.91	1.04	0.000786	22.67	1.01	0.05
XM_037209182.1	1199	Ccni	26.19	2.16	0.000801	33.17	-0.16	0.92
XM_028857121.2	421	Grap	90.25	-1.36	0.000823	87.69	-2.1	0.000281
XM_037199777.1	1444	Hsd17b14	35.45	1.14	0.000841	22.35	0.36	0.73
XM_037196761.1	2030	Trim21	21.97	1.23	0.000842	13.36	0.61	0.48
XM_028857363.2	2900	Stxbp2	49.89	1.18	0.000849	40.65	0.15	0.91
XM_028866150.2	4228	Rab8b	43.29	1.18	0.000859	32.81	1.38	0.01
XM_028884463.2	487	Rpl30	857.53	-1.19	0.000865	762.6	-0.34	0.79
XM_028873283.2	3293	Psip1	16.99	-1.32	0.000877	12.85	-0.69	0.33
XM_028863524.2	1547	Dok3	63.23	1.03	0.000883	60.3	-0.42	0.7
XM_028887079.2	3463	Stk26	15.11	-1.22	0.00089	10.74	-1.26	0.08
XM_028879887.2	4230	Sbk1	12.76	-1.32	0.000923	15.49	-1.34	0.03
XM_028877501.2	891	Rps3	1272.09	-1.16	0.000931	1139.98	-0.44	0.7
XM_028864777.2	927	Uchl3	33.7	1.43	0.000969	15.13	1.04	0.2
XM_028858865.2	1518	Napsa	38.25	1.2	0.000981	26.5	0.52	0.56
XM_028856101.2	1017	Rnase6	46.01	-1.61	0.000982	63.65	-1.58	0.000993
XM_028861345.2	3771	LOC114686693	53.01	1.17	0.000983	37.78	-0.18	0.9
XM_028891068.2	4417	Dhx38	24.8	1.05	0.001	16.51	0.54	0.5
XM_028890028.2	3903	Ptk2b	92.65	1.22	0.00101	59.84	0.15	0.91
XM_028879128.2	2137	Ifi44l	81.59	-1.12	0.00103	63.28	-0.89	0.26
XM_037210069.1	3264	Rasgrp4	66.56	1.25	0.00104	59.65	-0.79	0.4
XM_028877554.2	2365	P2ry2	16.2	1.91	0.00105	12.97	1.65	0.03
XM_028887958.2	1500	LOC114705846	101.75	1.2	0.00107	62.26	0.76	0.35
XM_028893385.1	3311	Slc20a1	10.41	1.63	0.00108	15.89	1.95	0.000983
XM_028871686.2	4486	Hmgcr	33.74	1.12	0.00108	34.99	1.19	0.06
XM_028885162.2	1491	Sirpb1b	60.42	1.23	0.00109	51.54	-0.9	0.23
XM_028855174.2	5043	Tgoln2	61.86	1.12	0.00109	37.28	0.73	0.42
XM_028854478.2	2620	Cap1	37.23	1.15	0.0011	27.85	0.43	0.62
XM_028887382.2	4632	Ttyh3	23.15	-1.07	0.0011	29.58	-1.09	0.06
XM_037210761.1	1101	LOC114697622	23.2	1.8	0.00112	22.16	1.39	0.07
XM_028892294.2	1280	Gapdh	822.73	1.15	0.00113	671.82	1.23	0.06
XM_028858455.1	4433	Clstn1	11.42	-1.14	0.00113	10.45	-1.28	0.02
XM_028888362.2	8978	Itpr3	16.01	-1.19	0.00113	17.33	-2.21	2.43e-05
XM_028868924.2	2248	Tob1	21.92	1.18	0.00115	14.23	0.46	0.67
XM_028875196.2	4197	St6gal1	17.91	-1	0.00115	18.6	-0.71	0.28
XM_037200369.1	11111	LOC119086849	24.78	1.21	0.00116	19.63	-0.28	0.83
XM_028860217.2	1611	Krcc1	45.75	1.02	0.00118	30.7	0.64	0.33
XM_028857707.2	1293	Mcub	24.81	-1.31	0.00118	22.97	-1.3	0.06
XM_028858564.2	6926	Abca7	20.83	1.15	0.0012	17.75	-0.44	0.67
XM_028886159.2	4633	Vsir	105.66	1.24	0.00121	66.23	-0.24	0.88
XM_028860146.2	2920	Tnfrsf1b	148.91	1.22	0.00121	107.9	0.35	0.79
XM_028861322.2	1659	Cln3	17.03	1.32	0.00123	10.41	0.48	0.71
XM_028895257.2	4886	Herc3	10.83	-1.11	0.00123	10.06	-0.96	0.1
XM_028871110.2	2604	LOC114694245	50.88	1.21	0.00125	39.02	-0.02	0.99
XM_028886742.2	4454	Mfsd6	11.39	-1.3	0.00126	10.91	-2.79	0.00317
XM_037207545.1	1456	Jaml	65.46	1.42	0.00129	48.46	-0.94	0.25
XM_028869784.2	5310	Samd9	57.64	1.09	0.00129	32.33	0.77	0.41
XM_028873735.2	1689	Idh2	13.91	-1.39	0.00132	15.1	-0.37	0.77
XM_028878370.2	1299	Nmi	71.66	1.18	0.00133	38.64	0.6	0.42
XM_028882848.2	2224	Traf5	37.17	1.03	0.00133	27.76	0.1	0.94
XM_028866338.2	3206	Cbl	20.15	1.38	0.00135	14.87	0.19	0.92
XM_028874204.2	3516	Rab10	57.35	1.09	0.00135	62.67	1.69	0.0022
XM_028854941.2	688	Selenow	123.08	-1.08	0.00136	145.35	-1.36	0.02
XM_028889957.2	1880	Dennd2d	26.48	1.2	0.00139	18.49	1.15	0.03
XM_028879049.2	2980	Srpra	38.73	1.03	0.00144	31.64	0.93	0.13
XM_028871240.2	5020	Srebf2	68.43	1.1	0.00145	52.54	0.77	0.37
XM_028883554.2	3695	Prps2	18.28	-1.09	0.00145	15.88	-0.17	0.89
XM_028892567.2	2915	Zfp36l2	28.74	-1.11	0.00145	28.14	-0.71	0.23
XM_028895322.2	2629	Mapkapk3	21.36	1.24	0.00148	15.96	0.87	0.12
XM_037211007.1	2693	Eef2k	17.36	1.4	0.00149	14.55	-1.06	0.43
XR_005091170.1	618	LOC119087661	82.66	-1.42	0.00151	56.14	-0.95	0.42
XM_037201792.1	1081	LOC114688817	67.75	1.05	0.00152	46.23	-0.31	0.83
XM_028889308.2	3231	Parp12	23.95	1.05	0.00153	16.1	0.77	0.24
XM_037203246.1	3785	Kcnab2	64.47	1.22	0.00156	42.24	-0.11	0.94
XM_028875214.2	1895	Dnajb11	37.5	0.97	0.00156	28.68	0.85	0.12
XM_037198213.1	1626	Plin3	20.4	1.35	0.00157	14.41	0.82	0.33
XM_028860796.2	3568	Akap8	15.78	-1.08	0.00157	11.61	-0.76	0.31
XM_037207042.1	2026	LOC119088213	27.91	2.31	0.00158	18.3	-1.52	0.21
XM_037200564.1	4331	Pik3r5	50.74	1.12	0.00158	41.38	0.89	0.22
XM_028860224.2	5924	Rmnd5a	33.99	-1.03	0.0016	32.42	-0.77	0.3
XM_028868749.2	1945	Entpd2	13.67	-1.38	0.00162	15.62	-0.98	0.23
XM_028888887.2	1464	Clec4a4	21.9	1.53	0.00163	13.08	1.11	0.22
XM_028868557.2	7021	Znfx1	35.39	1.11	0.00165	24.84	0.5	0.62
XM_028864449.1	5576	Suco	11.39	1.02	0.00167	13.11	1.81	0.00103
XM_028858102.2	3773	Prkch	23.95	-1.03	0.00173	23.4	-1.12	0.02
XM_028867782.2	541	Rps15a	617.46	-1.12	0.0018	645.12	-0.46	0.68
XM_028861178.2	2701	Tcf3	21.98	-1.12	0.0018	32.07	-1.28	0.00749
XM_028882969.2	4542	Ikzf1	12.97	1.08	0.00184	11.57	0.82	0.32
XM_028871183.1	1722	Atf4	84.54	1.02	0.00199	109.42	1.57	0.00406
XM_028864744.2	2617	Cxxc1	26.58	1	0.00201	19.94	0.34	0.72
XM_028893563.2	2378	Anxa11	88.55	1.23	0.00202	70.09	0.45	0.7
XM_028856053.2	1735	Hnrnpc	44.6	1.02	0.00205	26.85	0.76	0.29
XM_028858279.2	6862	Secisbp2l	18.57	1.03	0.0021	11.21	0.19	0.88
XM_028887428.2	3860	Tm9sf4	17.16	1.01	0.0021	11.95	0.8	0.16
XM_028862243.2	1237	Wdr83	18.94	1.29	0.00212	10.19	0.81	0.42
XM_028880606.1	5652	Agps	20.04	1.04	0.00212	14.07	0.8	0.25
XM_037204706.1	1558	LOC114703422	23.21	-1.17	0.00216	25.22	-0.17	0.9
XM_037204754.1	3059	Cd6	29.92	-1.13	0.00217	29.83	-1.75	0.00594
XM_028858704.2	937	Rps3a	1187.57	-1.08	0.00223	1084.44	-0.3	0.83
XM_028861565.2	2181	Trim30a	46.97	0.99	0.00224	29.76	0.43	0.63
XM_028856730.2	1269	Casp6	18.77	-1.39	0.00226	22.02	-2.17	0.00568
XM_037201791.1	1215	LOC114688817	125.2	1.03	0.00228	91.99	0.57	0.48
XM_028878281.2	2966	Vmp1	24.33	1.01	0.00235	14.51	0.61	0.41
XM_028864272.2	2254	Ccnjl	23.19	1.03	0.00236	15.66	0.12	0.93
XM_028877486.2	3578	Thap12	17.55	-1	0.00236	15.43	-0.21	0.85
XM_028856366.2	4144	Cd28	28.38	-1.21	0.00238	21.71	-1.5	0.00467
XR_003733076.2	1917	LOC114682685	18.94	1.24	0.00239	10.08	0.8	0.29
XM_037203243.1	3828	Kcnab2	16.32	0.97	0.00241	11	0.5	0.63
XM_037202550.1	1507	Cd72	17.57	-1.39	0.00248	19.01	-0.98	0.36
XM_028884671.2	1308	Fam78a	26.97	-1.24	0.00252	27.37	-1.94	0.00026
XM_028893564.2	2460	Anxa11	19.76	1.24	0.00257	13.07	0.93	0.16
XM_037207796.1	1773	Fbxo9	68.42	1.13	0.00257	39.67	0.32	0.77
XM_028857756.2	4344	Slc44a1	12.78	-1	0.00258	10.29	-0.62	0.49
XM_028888388.2	588	Rps18	816.03	-1.06	0.00261	753.26	-0.49	0.69
XM_028871814.1	2681	Hsd17b4	12.96	-1.15	0.00261	13.95	-0.84	0.29
XM_028878543.2	4064	Sirpa	73.54	1.25	0.00269	54.8	-1.25	0.08
XM_028886871.2	4658	Klhl18	16.31	1	0.00269	11.28	-0.02	0.99
XM_028857949.2	17953	Ahnak	49.83	-1.05	0.00276	55.52	-0.93	0.3
XM_037201542.1	526	LOC114699272	1133.73	-1.04	0.00278	1047.97	-0.34	0.81
XM_037210901.1	4603	Inf2	12.05	-1	0.00282	17.63	-0.33	0.82
XM_028868164.2	1564	Otulinl	31.26	-1.08	0.00282	30.27	-1	0.17
XM_028855610.2	2627	LOC114681853	13.15	-1.13	0.00284	13.95	-1	0.11
XM_037199877.1	4305	Ppp1r10	19.39	1.03	0.00286	12.34	0.53	0.47
XM_028855061.1	1945	Pld3	16.98	1.21	0.00287	28.5	1.77	0.00192
XM_028859132.2	600	Rps16	1184.82	-1.08	0.00287	1173.62	-0.45	0.7
XM_028893272.2	5150	Rrbp1	31.48	1.02	0.00288	48.01	1.74	0.01
XM_028891417.2	5441	Ski	14.78	-0.92	0.00294	14.57	-1.17	0.01
XM_028890898.2	5954	Adar	17.46	1.03	0.003	13.61	0.37	0.7
XM_028869786.2	5375	Samd9l	33.14	1.14	0.00305	22.14	-0.39	0.76
XM_037199764.1	1541	H2-Q10	73.46	1.12	0.00306	46.02	0.77	0.27
XM_028860387.2	5466	Fam117b	15.14	-1.06	0.00306	14.12	-1.11	0.03
XM_028887383.2	1882	Actb	3803.12	1.09	0.00312	2580.22	0.56	0.59
XM_028873742.1	754	Lbh	64.4	-1.22	0.00313	44.74	-1.25	0.06
XR_005092566.1	973	LOC119088825	26.74	1.27	0.00315	14.35	0.39	0.81
XM_037207809.1	1629	LOC114697278	21.01	1.2	0.00315	12.14	0.75	0.38
XM_028859977.2	2241	Gsk3a	45.35	0.96	0.00317	33.55	0.66	0.34
XM_037209856.1	901	LOC114687105	15.63	-1.68	0.00323	14.29	0.04	0.98
XM_028868174.1	3135	Retreg1	13.05	-1.09	0.00324	10.86	-1.27	0.02
XM_037204421.1	3760	Dpp4	14.53	-0.98	0.00327	14.03	-0.28	0.83
XM_028895082.2	3479	Il7r	40.64	-1.08	0.00327	31.52	-1.2	0.03
XM_028859835.2	2790	Elovl5	49.17	-0.92	0.00329	48.06	-0.72	0.27
XM_028865648.2	2573	Neurl3	18.97	1.2	0.0033	14.82	0.73	0.37
XM_028861557.2	1976	Trim30a	28.47	1	0.00332	19.29	0.81	0.31
XM_028894706.2	804	LOC114710540	41.19	-1.13	0.00332	45.78	-0.6	0.48
XM_028889309.2	6431	Zc3hav1	17.23	0.97	0.00338	13.77	0.62	0.43
XM_028880766.2	1236	Gadd45a	34.92	1.16	0.0034	21.97	0.99	0.23
XM_028881197.2	7006	Atp2b1	12.04	-0.96	0.00347	10.97	-0.68	0.29
XM_028855038.2	2948	Akt2	43.13	0.96	0.00349	30.36	0.76	0.23
XM_037205868.1	5272	Ripor2	86.46	1.09	0.00351	48.41	-0.51	0.67
XM_028891261.1	3575	Fbh1	30.07	0.99	0.00355	22	0.97	0.1
XM_037201980.1	845	LOC119087259	31.47	1.42	0.00357	19.71	-0.22	0.9
XM_028873243.2	3153	Sh3kbp1	12.08	-1.43	0.00358	12.69	-2.78	1.35e-07
XM_028859915.2	3848	Myo1f	117.62	1.12	0.00363	98.95	-0.7	0.53
XM_028894425.2	2461	Plod3	12.75	1.19	0.00364	15.97	1.27	0.03
XM_028888406.2	2082	Bak1	41.43	0.95	0.00366	33.23	0.33	0.75
XM_028866931.2	1881	Evi2b	164.18	1.15	0.00368	95.15	-0.09	0.95
XM_028856925.2	3078	Ell	16.08	1.11	0.00368	11.74	0.08	0.95
XM_028861878.2	702	Rpl13a	1269.08	-1.08	0.00368	1293.71	-0.6	0.56
XR_005092751.1	345	LOC119088989	36.69	-1.98	0.00376	26.27	-3.17	0.000826
XM_028876075.2	2052	Max	31.57	1.24	0.00379	19.89	1.95	0.000791
XM_028865102.2	962	Ssr2	61.9	0.94	0.0038	61.2	0.93	0.09
XM_028880591.2	2175	Plekha3	27.17	1.06	0.00382	14.06	0.31	0.81
XM_028884902.2	772	Rps5	558.29	-1.01	0.00385	565.48	-0.37	0.78
XM_028866422.2	2041	Jaml	56.32	1.1	0.00389	35.27	-0.6	0.57
XM_028855106.2	1157	Sertad1	22.78	1.26	0.00391	12.62	1.11	0.18
XM_028893197.2	778	Rps8	1000.41	-1.05	0.00392	1004.8	-0.42	0.73
XM_028883566.2	6912	Map3k1	33.47	-0.99	0.00394	31.03	-1.06	0.08
XM_028878028.2	581	Rpl21	1229.12	-1.03	0.00399	1178.02	-0.38	0.78
XM_028854772.2	1161	Srsf9	47.36	1.01	0.00401	30.25	0.4	0.68
XM_028861900.2	621	Rps11	3559.71	-1.03	0.00402	3191.15	-0.46	0.72
XM_028855288.2	3210	Cd22	25.55	-1.12	0.00404	29.32	-1.35	0.03
XM_028875432.2	4723	Eloa	16.41	0.94	0.00406	11.98	0.49	0.52
XM_037197992.1	5487	Man2a2	12.28	-1.31	0.00408	11.63	-2.94	1.2e-07
XM_028870694.2	791	Rnf185	17.42	1.57	0.00411	11.26	1.17	0.29
XM_028886926.2	1633	Shisa5	26.17	-1.17	0.00414	20.33	-1.93	0.02
XM_028863215.2	475	LOC114688674	730.97	-1.03	0.0042	683.36	-0.26	0.85
XM_028856637.2	1730	LOC114682666	30.99	1.18	0.00421	17.78	0.33	0.83
XR_005091113.1	1614	LOC119087630	25.78	-1.59	0.00427	22.99	-2.51	3.33e-05
XM_028863929.2	1506	Arpc4	143.8	1	0.00433	98.71	0.73	0.35
XM_028866903.2	1454	Rpl4	954.85	-1.02	0.00435	962.83	-0.34	0.81
XM_028876500.2	2889	Rassf5	104.01	1.06	0.00439	72.8	0.04	0.98
XM_028867327.2	3360	LOC114691801	19.58	-1.03	0.00441	15.16	-1.96	0.000717
XM_028890716.2	2460	Nfkbie	30.01	0.98	0.00443	22.92	0.91	0.11
XM_037202160.1	2765	Lilra3	61.61	1.07	0.00448	40.11	-0.31	0.83
XM_028854936.2	1567	Nop53	172.3	-1	0.00448	200.09	-0.68	0.42
XM_028878056.2	2337	Ubl3	55.67	0.98	0.00449	42.64	0.28	0.83
XM_028890024.2	2050	Dpysl2	12.99	-1.32	0.00452	12.9	-1.16	0.14
XM_028891202.2	4250	Eaf1	18.46	0.88	0.00455	11.35	0.38	0.7
XM_028891146.2	2225	Ldb1	21.97	-1.12	0.00464	23.81	-1.09	0.06
XM_037210955.1	4920	Nedd4	16.01	-1.16	0.00471	14.86	-1.16	0.34
XM_028865588.2	1136	Cd48	173.73	1.06	0.00472	113.04	0.72	0.39
XM_028861017.2	923	Psmb9	87.07	0.97	0.00472	59.93	0.67	0.33
XM_028895017.2	6662	Lrrc58	16.03	1.19	0.00475	10.25	1.41	0.00512
XM_028879707.2	1819	Anxa7	23.87	1.17	0.00479	23.15	0.77	0.4
XM_037211763.1	3097	Klhl2	30.49	1.01	0.00479	22.96	0.42	0.69
XM_028884247.2	1293	LOC114703422	30.88	-1.07	0.00479	31.68	-0.73	0.35
XM_028877336.2	4015	Themis	12.93	-1.3	0.00483	10.44	-2.37	0.000208
XM_037206307.1	5886	Kiaa0513	61.43	1.11	0.00486	50.63	-0.72	0.52
XM_028894319.2	522	Rps20	1247.25	-0.99	0.005	1226.99	0.07	0.96
XM_028866355.2	2070	Snx1	42.85	-0.91	0.00505	43.7	-0.84	0.11
XM_028861500.2	1118	Cd79a	286.88	-1.08	0.00509	357.18	-0.63	0.57
XM_028890844.2	398	Rps27	1104.95	-0.99	0.00511	1131.69	-0.44	0.73
XM_028862159.2	1610	Cxcl16	14.6	1.18	0.00517	26.73	2.29	0.00095
XM_028885863.2	1318	Orai1	13.65	1.52	0.00518	15.22	1.11	0.25
XM_028867397.2	1057	Rpl5	971.55	-1.04	0.0052	965.81	-0.46	0.69
XM_028857892.2	5835	LOC114683572	18.76	-0.9	0.00523	19.44	-1.03	0.04
XM_028871173.2	1360	Rpl3	654.87	-1.01	0.0053	675.55	-0.3	0.83
XM_028883079.2	2176	Rpl22	91.14	-1.01	0.00534	89.42	-0.37	0.76
XM_028869985.2	4904	Pik3cb	29.34	1.03	0.0054	21.54	-0.08	0.95
XM_028884367.2	666	LOC114703539	31.25	1.34	0.00546	16.48	0.71	0.56
XM_028884739.2	2021	Cdk9	48.95	0.93	0.00547	37.13	0.4	0.66
XM_028855400.2	1553	Suclg2	25.73	-1.05	0.00547	26.17	-0.91	0.15
XM_028869409.2	577	Rpl26	920.46	-0.99	0.0055	865.56	-0.23	0.87
XM_028864375.2	1666	Cd247	55.73	-1.11	0.0055	54.44	-1.75	0.00411
XM_028871188.2	2342	Grap2	27.12	-1.03	0.00552	25.26	-1.36	0.07
XM_028893795.2	1808	Zbp1	17.5	1.48	0.00558	10.91	0.1	0.95
XM_028891549.2	565	Rps27a	1054.15	-0.99	0.00558	985.61	-0.23	0.87
XM_028880035.2	2011	Gm2a	56.06	-1.03	0.00562	81.71	-0.7	0.4
XM_028864797.2	6051	Kctd12	29.68	-1.03	0.00562	28.98	0.62	0.63
XM_037210024.1	3348	Ifnar2	66.96	1.05	0.00583	44.57	0.28	0.83
XM_028890107.2	613	Rps14	1180.52	-0.98	0.00583	1091.4	-0.31	0.83
XM_028854705.2	3189	Ctnnb1	12.88	1.09	0.0059	11.52	1.17	0.03
XM_028860223.2	1392	Cd8b	26.49	-1.26	0.00592	18.04	-1.49	0.18
XM_028872782.2	3908	Arrdc4	15.94	1	0.00602	16	1.62	0.000917
XR_005090628.1	248	LOC119087186	119.91	-1.72	0.00611	142.05	-2.46	0.000209
XM_028873788.2	554	Rps17	1110.55	-0.99	0.00615	1073.09	-0.23	0.87
XM_028864549.2	6968	Arfgef1	58.57	1.05	0.00621	35.99	0.6	0.56
XM_028872176.2	1223	Arhgdib	845.32	1.04	0.00624	617.46	0.16	0.92
XM_028875039.2	545	LOC114697018	452.42	-1.02	0.00625	441.11	-0.37	0.77
XM_028875080.2	2813	Acsl5	29.24	1.01	0.00629	30.22	1.34	0.03
XM_028875438.2	2082	Fuca1	41.45	1.02	0.00639	30.97	0.15	0.9
XM_028892082.2	968	Rps4x	800.73	-0.97	0.00646	812.91	-0.28	0.83
XM_028869901.2	7722	Dnajc13	15.57	0.94	0.00647	11.55	0.79	0.24
XM_028882411.2	3590	Arhgef3	11.24	-1.56	0.00647	10.19	-2.36	0.000103
XM_028854789.2	3646	Xpc	18.2	-0.95	0.00651	19.05	-1.45	0.00168
XM_028857939.1	1563	Eef1g	322.21	-0.97	0.00655	328.96	-0.44	0.7
XM_028876193.2	2201	Sp110	18.05	1.06	0.00663	12.58	0.3	0.83
XM_028885161.2	1668	Sirpb1b	34.47	1.18	0.00665	25.29	-0.24	0.85
XM_028877132.1	2655	Psen1	26.66	0.92	0.00673	30.57	1.07	0.16
XR_005092690.1	637	LOC119088928	14.85	1.99	0.00676	15.33	1	0.55
XM_028856798.2	4930	LOC114682785	42.82	0.99	0.00677	31.42	-0.06	0.96
XM_028854714.2	770	Rpl14	1173.23	-1	0.00682	1121.61	-0.36	0.78
XM_028885714.2	3769	Sp3	41.54	0.91	0.00683	21.9	0.44	0.59
XM_028892261.2	933	LOC114708759	12.43	1.68	0.00688	23.37	-0.13	0.94
XM_028867529.1	3675	Tbc1d23	15.12	0.92	0.00689	10.41	0.62	0.46
XM_028873059.2	3368	Nap1l1	19.85	-1.01	0.00693	15.12	-0.24	0.84
XM_037201053.1	9011	Nlrp1a	21.19	0.93	0.00695	15.25	0.12	0.93
XM_028859214.2	709	Rpl18	512.43	-0.96	0.00695	492.74	-0.44	0.71
XM_028860050.2	1343	Ccrl2	22.76	1.3	0.00696	15.13	1.41	0.03
XM_037205727.1	4436	Sema4d	94.38	1.28	0.00696	39.78	-0.43	0.79
XM_028888864.2	3844	Msn	377.18	1.01	0.00697	249.63	0.46	0.68
XM_028857494.2	2115	Map2k3	39.88	0.93	0.00697	35.91	0.65	0.38
XM_028874506.2	3692	Eif4b	132.69	-0.93	0.00703	141.82	-0.84	0.25
XM_028866556.2	687	Cd3d	106.96	-1.3	0.00705	101.99	-2.44	5.68e-05
XM_028867674.2	2625	Dek	20.69	-1.1	0.00711	17.7	-0.34	0.74
XM_037207649.1	3906	Ets1	16.21	-0.93	0.00718	15.41	-1.19	0.08
XM_028887997.2	3871	Ehmt2	20.46	-0.94	0.00725	24.76	-0.92	0.1
XM_028861331.2	2091	Cd19	15.33	-1.51	0.00726	20.99	-1.57	0.03
XM_028854475.2	2639	Cap1	159.15	1	0.00736	121.51	0.35	0.78
XM_028863588.2	946	Arhgap10	36.47	-2.94	0.00741	35.08	-2.92	0.00248
XM_028887831.2	4860	Tomm20	23.39	-0.87	0.00743	22.79	-0.22	0.85
XM_028869881.2	730	Ifitm3	46.97	1.45	0.00746	31.32	0.89	0.42
XM_028885333.2	387	Rps21	571.65	-1	0.0076	567.61	-0.21	0.88
XM_028878424.2	1796	Tspan13	54.11	-0.96	0.00761	58.82	-1.36	0.02
XM_028888273.2	490	Ifi27l2a	432.3	1.17	0.00763	398.85	-0.94	0.3
XM_028882505.2	3020	Rftn1	16.81	-1.1	0.00763	14.85	0.04	0.98
XM_037202171.1	1582	Lilrb4	28.63	-1.63	0.00763	31.17	-2.58	6.97e-06
XM_037204561.1	1717	St6galnac4	22.55	1.08	0.00772	17.29	-0.08	0.95
XM_028891024.2	579	Rps23	1111.61	-0.95	0.00775	1027.32	-0.05	0.97
XM_028861063.2	4066	Tab2	33.52	0.9	0.00777	25.22	0.43	0.65
XM_028894395.2	3587	Ywhag	27.2	0.89	0.00777	30.59	1.43	0.00867
XM_028883681.2	447	Crip1	490.49	-1.12	0.00784	681.9	-0.29	0.87
XM_028870164.2	2317	Gusb	10.73	-1.26	0.00789	16.94	-1.3	0.02
XM_028888806.2	3600	Chuk	25.47	0.9	0.00798	15.37	0.49	0.54
XM_028868449.2	2365	Sdc4	32.18	1.33	0.00805	251.65	5.54	1.89e-11
XM_028893120.2	2322	Tmbim1	45.16	0.92	0.00805	44.84	1.15	0.03
XM_037198881.1	3456	Septin6	35.68	-0.99	0.00815	35.02	-1.81	3.31e-05
XM_028869108.2	567	Rpl23	749.25	-1	0.00816	725.56	-0.29	0.83
XM_028861258.2	735	Gng2	22.34	-1.4	0.00831	18.55	-1.13	0.29
XM_037204728.1	1998	Cd5	30.77	-1.17	0.00833	31.83	-2.41	1.6e-05
XM_037209862.1	881	LOC114687105	15.72	-1.59	0.00836	19.31	-0.84	0.41
XM_028880448.2	2849	Il17ra	193.64	1.03	0.00849	143.88	-0.26	0.85
XM_028855883.2	2924	Ehbp1l1	15.38	1.1	0.00852	12.63	1.08	0.05
XM_028888381.2	789	Rpl10a	843.42	-0.97	0.00871	936.48	-0.5	0.64
XM_028873668.2	3615	Lpcat1	24.86	0.97	0.00874	16.73	0.49	0.57
XM_028863998.2	572	Rpl32	701.85	-0.97	0.00884	737.73	-0.43	0.72
XM_037209165.1	1230	Taldo1	25.67	1.44	0.00885	11.72	-0.03	0.99
XM_028861659.2	362	Rpl38	633.55	-0.92	0.00896	609.56	0.3	0.84
XM_028862304.2	1374	Nt5c3b	28.87	-1.02	0.00904	33.44	-1.03	0.1
XM_028889523.2	2134	Ccr7	117.39	-1.06	0.00908	107.38	-1.09	0.19
XM_028875810.2	1361	Tnfsf10	13.95	1.35	0.00911	10.23	0.46	0.81
XM_028887564.1	947	Fabp5	25.06	1.32	0.00911	43.96	1.72	0.01
XM_028866633.2	1149	Rnaset2	51.31	0.94	0.00911	46.18	0.29	0.8
XM_028854724.2	1088	Rpsa	738.28	-0.95	0.00911	822.11	-0.27	0.83
XM_028883249.2	2813	Set	30.32	-0.91	0.00927	26.18	0.16	0.9
XM_028877650.2	5322	Arl5a	13.28	-0.86	0.00937	11.91	-0.48	0.56
XM_037209858.1	898	LOC114687105	15.38	-1.61	0.00955	16.76	-1.25	0.19
XM_028889264.2	818	Hmgb2	286.58	0.92	0.00957	227.91	0.12	0.94
XM_028866222.2	3256	Calu	13.98	0.98	0.00958	15.13	1.27	0.03
XM_028864618.2	905	Rpl7	940.4	-0.93	0.00958	879.09	-0.15	0.92
XR_005091645.1	3720	Pdcd4	17.4	-0.88	0.00959	16.91	-1.18	0.05
XR_003736138.2	716	LOC114703406	57.12	0.97	0.00966	32.29	1.18	0.09
XM_028854921.2	2188	Ptgir	12.12	1.19	0.00978	19.76	1.53	0.02
XM_028871046.2	2645	Cars1	10.37	1.12	0.0098	10.29	1.24	0.03
XM_028881936.2	5083	Septin11	15.13	-0.89	0.00981	15.49	-0.67	0.33
XM_028884053.2	3808	B4galt1	30.43	0.93	0.00987	23.11	0.72	0.32
XM_028865035.2	1878	Pstpip1	62.51	0.96	0.00999	52.28	-0.36	0.76
XM_028877876.2	2152	Rcn1	13.9	1.45	0.01	11.9	1.13	0.07
XM_028870110.2	1828	Irf7	116.08	1.41	0.01	44.04	0.92	0.35
XM_028863795.2	3855	Syk	13.01	1.37	0.01	10.16	0.46	0.63
XM_037204153.1	653	Clec4a	45.57	1.28	0.01	22.5	0.26	0.89
XM_028884165.2	1749	Fdft1	21.82	1.18	0.01	18.02	0.88	0.22
XM_028867775.2	1224	LOC114692119	17.39	1.18	0.01	15.92	-0.37	0.83
XM_028886312.2	2253	Slc49a4	10.83	1.18	0.01	10.51	0.95	0.21
XM_028871472.2	2807	Tpcn2	14.55	1.14	0.01	10.68	-0.49	0.66
XM_028890794.2	493	S100a6	113.13	1.12	0.01	91.51	-0.49	0.66
XM_028880841.2	1959	Mvd	15.38	1.09	0.01	17.67	1.29	0.03
XM_028887418.2	1581	Plek	230.35	1.07	0.01	198.31	0.94	0.21
XM_037199748.1	1659	LOC114686366	39.65	1.07	0.01	22.23	0.31	0.88
XM_037203490.1	652	LOC114695604	46.26	1.05	0.01	28.74	-0.09	0.95
XM_028886393.2	1806	Pgk1	156.59	1.04	0.01	141.03	1.06	0.13
XM_028889346.2	9193	Kdm7a	24.99	1.03	0.01	12.97	-0.09	0.95
XM_028867518.2	1940	Tfg	15.91	1.03	0.01	14.08	1.19	0.05
XM_037201695.1	4151	Irgm1	85.43	1.02	0.01	47.17	0.86	0.35
XM_028874319.2	3126	Itgb2	227.52	1	0.01	202.5	-0.22	0.88
XM_028874911.1	2746	Actr3	88.14	1	0.01	86.02	0.82	0.38
XM_028859877.2	1698	Bckdha	29.58	1	0.01	22.17	0.77	0.24
XM_037211368.1	3737	Ptprc	221.96	0.97	0.01	135.36	0.07	0.96
XM_028885899.2	881	Arpc3	279.89	0.96	0.01	217.15	0.62	0.49
XM_028895090.2	3117	Fam107b	137.68	0.96	0.01	78.91	0.7	0.43
XR_005090711.1	297	LOC119087290	118.44	0.96	0.01	76.22	0.31	0.82
XM_028885556.1	3203	Tbc1d10b	32.63	0.94	0.01	23.79	0.55	0.47
XM_037205741.1	5108	Fgd3	13.79	0.94	0.01	10.06	-0.26	0.83
XM_028891402.2	1092	Ssu72	42.3	0.93	0.01	31.35	0.49	0.56
XM_028882237.2	2417	Ugdh	36.81	0.93	0.01	26.83	0.09	0.94
XM_028884740.2	3090	Sh2d3c	30.56	0.92	0.01	24.41	-0.46	0.68
XM_037201712.1	1999	LOC114687019	235.05	0.9	0.01	161.06	0.51	0.63
XM_028886666.2	3948	Stat1	122.39	0.9	0.01	82.33	0.61	0.52
XM_028888178.2	2968	Zdhhc18	68.45	0.89	0.01	46.19	0.16	0.92
XM_028888690.2	7192	Ankfy1	15.83	0.88	0.01	11.77	0.36	0.73
XM_028884528.2	5064	Tmx4	15.73	0.88	0.01	13.11	-0.65	0.44
XM_028888444.2	3538	Mapk14	45.44	0.86	0.01	37.65	0.01	0.99
XM_028868574.2	2222	Rnf114	62.91	0.85	0.01	50.23	0.6	0.43
XM_028882034.2	6368	Marchf6	17.33	0.85	0.01	11.33	0.4	0.67
XM_028882240.2	3712	Ube2k	15.14	0.85	0.01	10	0.85	0.15
XR_005091038.1	1223	LOC119087578	107.6	0.84	0.01	71.77	0.5	0.53
XM_037201789.1	1415	LOC114688817	46.38	0.83	0.01	33.22	0.42	0.64
XM_028872447.2	2192	Kri1	34.79	0.82	0.01	28.56	0.48	0.54
XM_028856279.2	4376	Arnt	20.72	0.81	0.01	16.62	0.2	0.85
XM_028859420.2	4517	Eif2ak3	17.92	-0.83	0.01	22.54	-1.29	0.0052
XM_028868419.2	4681	Ttpal	19.1	-0.84	0.01	18.5	-1.13	0.02
XM_028875729.2	4281	Mbtps1	13.61	-0.84	0.01	14.81	-0.68	0.3
XM_028876589.2	524	Snrpe	180.14	-0.86	0.01	162.83	-0.56	0.48
XM_028879589.2	1219	LOC114700097	97.37	-0.87	0.01	92.22	-1.38	0.01
XM_028867956.2	1535	Eif3e	71.78	-0.87	0.01	65.88	-0.69	0.35
XM_028888341.2	648	Rps10	1037.62	-0.88	0.01	1021.25	0.12	0.94
XM_028864239.2	5335	Cyfip2	46.87	-0.88	0.01	49.79	-1.34	0.01
XM_028883379.2	7302	Bcl2	12.92	-0.88	0.01	10.41	-1.21	0.03
XM_028867766.2	917	LOC114692108	57.78	-0.89	0.01	67.47	0.18	0.88
XM_028868490.2	3467	Elmo2	15.46	-0.9	0.01	20.88	-1.62	0.000382
XM_028870020.2	438	Rpl37a	1147.57	-0.91	0.01	1042.85	-0.11	0.95
XM_028886770.2	3968	Matr3	14.73	-0.91	0.01	15.82	-0.63	0.45
XM_028858907.2	332	Rps29	805.95	-0.92	0.01	818.75	-0.01	0.99
XM_028862728.2	3003	Eef2	489.92	-0.92	0.01	578.51	-0.54	0.58
XM_028855663.2	953	Rpl6	644.36	-0.93	0.01	658.69	-0.35	0.79
XM_028893580.2	608	Rps24	136.61	-0.94	0.01	112.4	0.43	0.68
XM_028889552.2	780	Rpl19	779.55	-0.95	0.01	859.01	-0.29	0.83
XM_028883565.2	3601	Tlr8	11.49	-0.95	0.01	14.49	-2	1.94e-05
XM_028858622.2	5819	Rfx1	10.59	-0.95	0.01	12.13	-1.62	0.00359
XM_028874009.2	854	LOC114696334	1028.97	-0.96	0.01	1085.41	-0.39	0.76
XM_028866372.2	537	Rps25	964.7	-0.97	0.01	911.89	-0.33	0.83
XM_028869029.2	1791	Skap1	41	-0.99	0.01	39.55	-1.43	0.05
XM_028865575.2	2503	Pea15	15.06	-1	0.01	16.12	-0.37	0.71
XM_028864151.2	1861	Cbx3	24.28	-1.08	0.01	18.29	-0.55	0.53
XM_028854883.2	1087	Hopx	68	-1.13	0.01	92.34	-1.98	5.84e-06
XM_028856852.2	2350	Lef1	24.79	-1.17	0.01	23.49	-1.87	0.0018
XM_037209852.1	887	LOC114687105	33.74	-1.22	0.01	37.35	-1.04	0.14
XM_028868261.2	1633	Gpr18	12.31	-1.24	0.01	11.07	-0.85	0.45
XM_028888584.2	1012	Fundc2	14.49	-1.36	0.01	12.14	-0.45	0.8
XM_028890100.2	3566	Csf1r	73.77	-1.37	0.01	124.68	-1.62	0.03
XM_028861090.2	1734	Ephx1	11.96	-1.44	0.01	15.82	-1.81	0.00618
XM_028887219.2	570	Dnph1	18.1	-1.81	0.01	12.87	-1.67	0.16
XR_005090729.1	799	LOC114686727	13.98	-1.96	0.01	16.74	-2.24	0.03
XM_028860519.2	2249	St3gal5	81.58	3.55	0.02	70.13	2.3	0.000311
XM_037202221.1	1798	Lilrb3	37.53	1.66	0.02	19.48	0.00457	1
XM_037198513.1	1089	Oas1a	20.17	1.61	0.02	16.13	0.23	0.91
XM_037209566.1	2014	Gapt	13.03	1.59	0.02	10.85	-0.53	0.76
XM_037210791.1	452	Ifi27l2a	44.29	1.44	0.02	34	-0.37	0.84
XM_028859787.2	617	LOC114685171	2407.12	1.34	0.02	2372.31	-0.69	0.54
XR_005089991.1	310	LOC119086649	58.68	1.23	0.02	32.1	0.11	0.95
XM_028858722.2	2723	Slc2a6	21.83	1.23	0.02	45.06	1.93	0.01
XM_028884725.2	1176	St6galnac4	20.86	1.17	0.02	15.99	-0.14	0.94
XR_005090957.1	3211	LOC119087481	128.06	1.13	0.02	104.14	1.39	0.02
XM_028860227.2	945	Chmp3	26.93	1.11	0.02	19.85	0.68	0.49
XM_028865713.2	1193	Mitd1	25.61	1.1	0.02	13.63	0.89	0.33
XM_028894144.2	6653	Dock8	17.01	1.1	0.02	19.66	-0.33	0.84
XM_028866353.2	3396	C2cd2l	16.69	1.1	0.02	11.93	0.41	0.75
XM_028865589.2	3405	Slamf7	33.29	1.07	0.02	36.37	1.99	0.00214
XM_028863018.2	1683	Mboat7	26.22	1.06	0.02	27.39	-0.02	0.99
XM_028886247.2	921	Ddit3	25.18	1.05	0.02	15.55	0.58	0.6
XM_037205215.1	4023	Sirpa	17.93	1.04	0.02	13.84	-1.14	0.07
XM_028878784.2	2202	Plbd2	15.74	1.03	0.02	13.48	0.84	0.28
XM_028887937.2	659	Ltb	61.93	1.02	0.02	54.11	-0.27	0.83
XM_028890353.2	2085	Daglb	28.53	1.01	0.02	22.6	-0.68	0.46
XM_028875082.2	2367	Acsl5	24.43	1	0.02	26.79	1.31	0.00918
XM_028871467.2	1960	Herpud1	20.55	0.99	0.02	14.08	0.72	0.33
XM_028888609.2	8441	Flna	187.57	0.98	0.02	157.75	-0.24	0.87
XM_037198483.1	7001	Abhd2	17.98	0.96	0.02	14.91	-0.00999	0.99
XM_028876620.2	2221	Adipor1	167.15	0.95	0.02	140.83	0.41	0.76
XM_028894084.2	3129	Pak2	73.2	0.91	0.02	45.98	0.58	0.54
XM_037199755.1	1524	LOC114686366	97.44	0.9	0.02	73.89	0.68	0.38
XR_005090776.1	503	LOC119087365	72.97	0.9	0.02	54.51	0.02	0.99
XM_028877179.2	1011	Dctn6	58.55	0.9	0.02	50.39	0.39	0.67
XM_028890637.2	2996	Rnpepl1	53.38	0.9	0.02	47.71	0.21	0.87
XM_028884228.2	1398	LOC114703404	137.01	0.88	0.02	88.74	0.32	0.78
XM_037198190.1	3041	Dpp9	14.93	0.88	0.02	11.68	0.21	0.85
XM_028889955.2	3177	Capza1	116.13	0.86	0.02	77.36	0.58	0.55
XM_028892332.1	1347	Tpi1	69.51	0.86	0.02	85.22	1.13	0.06
XM_028882157.2	2553	Rnf13	27.13	0.86	0.02	16.63	0.82	0.17
XM_028854477.2	2623	Cap1	41.24	0.85	0.02	32.06	0.61	0.42
XM_028885579.2	5219	Fbrs	28.77	0.85	0.02	22.64	0.19	0.87
XM_028866427.2	3570	Il10ra	22.66	0.85	0.02	18.64	0.85	0.18
XM_028857679.2	5799	LOC114683381	16.39	0.84	0.02	13.09	-0.32	0.77
XM_028859979.2	1871	Dedd2	35.76	0.82	0.02	28.92	0.19	0.88
XM_028885442.2	3568	Stk40	23.2	0.82	0.02	20.09	0.23	0.83
XM_028855915.2	2695	Rela	45.56	0.81	0.02	38.36	0.83	0.19
XM_037200720.1	3308	Ap2b1	19.17	0.81	0.02	20.02	1.17	0.02
XM_028875914.2	6377	Sel1l	18.27	0.81	0.02	14.31	0.54	0.54
XM_028885784.2	5415	Fam126b	16.23	0.8	0.02	10.39	0.34	0.78
XM_028868279.2	2304	Ggact	27.69	0.77	0.02	18.03	-0.00171	1
XM_028894780.2	3538	Glyr1	23.91	0.77	0.02	16.25	0.7	0.27
XM_028872067.2	2977	Slc35a5	20.58	0.77	0.02	13.09	0.45	0.65
XM_028855891.2	2408	Dpf2	28.78	0.76	0.02	20.87	0.6	0.36
XM_028858157.2	3598	Tpp1	16.97	0.76	0.02	14.79	0.22	0.84
XM_028858263.2	1593	Eid1	42.59	-0.75	0.02	35.71	-0.37	0.68
XM_028857216.2	6378	Jade2	19.39	-0.79	0.02	17.38	-0.84	0.18
XM_028868981.2	4392	Ppp1r9b	35.03	-0.8	0.02	42.85	-0.97	0.09
XM_028873635.1	2928	Sdha	34.46	-0.81	0.02	36.31	-0.43	0.62
XM_028888642.2	2346	Got2	26.64	-0.81	0.02	26.06	-0.43	0.61
XM_028890598.2	5528	Mbnl1	10.95	-0.82	0.02	11.72	-1.02	0.11
XM_028870317.2	502	Rplp2	626.45	-0.83	0.02	520.56	0.51	0.69
XM_028884187.2	2625	Blk	22.87	-0.83	0.02	24.54	-0.48	0.64
XM_037203340.1	23963	Macf1	15.72	-0.83	0.02	16.02	-1.47	0.0079
XM_028875584.2	443	Rpl37	1094.48	-0.84	0.02	997.11	0.12	0.94
XM_028854718.2	7033	Nup210	40.81	-0.85	0.02	46.14	-1.25	0.03
XM_028888562.2	2904	Scp2	21.5	-0.85	0.02	22.65	-0.63	0.36
XM_028867635.2	516	Rplp1	1554.88	-0.86	0.02	1673.97	0.09	0.95
XM_028861454.2	1814	Eef1a1	3418.29	-0.87	0.02	3282.85	-0.3	0.83
XM_028893577.2	588	Rps24	1425.83	-0.88	0.02	1434.05	0.04	0.98
XM_028884576.2	570	Rps13	742.6	-0.88	0.02	801.07	-0.39	0.76
XM_037207133.1	4479	Bank1	18.04	-0.88	0.02	17.62	-0.27	0.84
XM_028895291.2	635	Rpl29	523.93	-0.89	0.02	536.61	-0.41	0.74
XM_028882234.2	734	Rpl9	773.13	-0.9	0.02	759.07	-0.37	0.77
XM_028888762.2	1105	Rack1	703.12	-0.9	0.02	748.66	-0.42	0.72
XM_028864182.2	450	Tomm7	99.96	-0.9	0.02	99.32	-0.4	0.72
XM_028855499.2	521	Rps26	588.91	-0.91	0.02	689.41	-0.5	0.63
XM_037200187.1	1006	Nrm	46.71	-0.91	0.02	54.16	-0.97	0.08
XM_028869325.2	6272	Chd3	36.55	-0.91	0.02	39.24	-1.49	0.00573
XM_028854311.1	1463	Acd	29.73	-0.91	0.02	36.01	-1.03	0.06
XM_028889871.2	3751	Nek7	13.72	-0.92	0.02	11.76	-1.07	0.08
XM_028867708.2	3145	LOC114692079	20.9	-0.94	0.02	19.36	-1.8	4.43e-05
XM_028879590.2	1302	Gimap7	84.93	-0.95	0.02	77.3	-2.01	0.00281
XM_028870179.2	2026	Nipsnap2	14.94	-0.95	0.02	15.1	-1.11	0.07
XM_028879577.2	1966	LOC114700093	25.7	-0.96	0.02	22.52	-1.99	0.00665
XM_028866151.2	1378	LOC114691039	23.6	-0.99	0.02	23.95	0.06	0.97
XM_028878522.2	3432	Nsmaf	15.98	-1	0.02	15.05	-1.45	0.09
XM_028858549.2	2596	Pwwp3a	15.15	-1.01	0.02	16.98	-1.86	0.000282
XM_028884211.2	4142	Mpeg1	85.38	-1.02	0.02	89.09	-0.07	0.96
XM_037199487.1	1084	LOC114707456	36.15	-1.03	0.02	28.3	-0.21	0.86
XM_028889152.2	1837	Cmpk1	13.75	-1.03	0.02	10.67	-0.18	0.91
XM_028861810.2	882	LOC114687105	35.4	-1.05	0.02	55.43	-1.19	0.04
XM_028880034.2	1827	Ccdc69	17.35	-1.08	0.02	22.51	-1.22	0.06
XM_028855756.2	1869	Mtarc2	11.38	-1.08	0.02	13.14	-0.93	0.28
XM_028893273.2	1748	Dstn	14.14	-1.11	0.02	18.53	-1.16	0.08
XM_028866553.2	879	Cd3g	100.84	-1.16	0.02	92.21	-2.35	3.22e-05
XM_028874152.2	1381	Vpreb3	14.29	-1.18	0.02	13.57	-0.77	0.56
XM_028884233.2	2221	Tmem109	10.82	-1.22	0.02	12.15	-1	0.22
XM_028883157.2	1332	Adi1	10.86	-1.26	0.02	13.75	-1.28	0.11
XR_005090152.1	349	LOC119086796	3606.7	-1.27	0.02	3370.88	-0.5	0.75
XM_028881876.2	636	LOC114701718	65	-1.29	0.02	143	0.36	0.83
XM_028866554.2	876	Cd3g	29.61	-1.29	0.02	25.69	-2.92	0.00042
XM_028887313.2	2570	Septin6	10.68	-1.33	0.02	10.28	-1.11	0.17
XM_028870783.2	2338	LOC114694064	14.53	-1.46	0.02	13.74	-0.9	0.52
XM_028863631.2	944	Arhgap10	25.54	-2.99	0.02	21.1	0.7	0.88
XM_028891462.2	649	Isg15	790.28	1.44	0.03	364.11	0.25	0.9
XM_028890765.2	1177	Tpm3	14.31	1.23	0.03	11.73	-1.04	0.39
XR_003735254.2	1716	Sp100	17.35	1.18	0.03	12.13	0.26	0.88
XM_028860794.2	1302	Cited2	37.03	1.06	0.03	42.09	1.21	0.04
XM_028869096.2	5716	Mllt6	23.44	1	0.03	17.68	0.81	0.23
XM_028890795.2	476	S100a6	283.37	0.99	0.03	218.74	-0.37	0.72
XM_028868137.2	1985	Pgm2	17.77	0.98	0.03	11.88	0.35	0.79
XM_037203669.1	896	LOC119087599	27.91	0.96	0.03	17.21	-0.02	0.99
XM_037202191.1	3592	Lilra6	108.48	0.94	0.03	101.76	-0.4	0.82
XR_003733557.1	647	Selenok	46.18	0.91	0.03	29.5	0.59	0.54
XM_028861050.2	1446	LOC114686366	188.97	0.9	0.03	131.76	0.67	0.48
XM_028854476.2	2642	Cap1	128.86	0.89	0.03	103.75	0.23	0.86
XM_028862158.2	1788	Arrb2	105.25	0.89	0.03	77.97	0.28	0.83
XM_028885793.2	1343	Rilpl2	31.87	0.89	0.03	25.51	0.39	0.69
XM_028879979.2	4070	Morc3	30.52	0.89	0.03	18.6	0.56	0.48
XM_028864298.2	2178	Rars1	23.84	0.89	0.03	19.94	1.05	0.06
XM_028855006.2	1521	Rnf130	22.36	0.89	0.03	18.67	0.29	0.83
XM_028855901.2	2968	Capn1	50.35	0.88	0.03	40.95	-0.07	0.96
XM_028877920.2	2854	Cd44	133.37	0.87	0.03	124.34	0.11	0.94
XR_005090716.1	368	LOC119087294	127.1	0.86	0.03	92.6	0.15	0.9
XM_028876351.2	2396	B3gnt2	53.15	0.86	0.03	29.38	0.32	0.74
XM_028890269.2	2912	Cd164	82.36	0.85	0.03	52.78	0.68	0.43
XM_028895001.2	2000	Hcls1	186.57	0.84	0.03	162.03	0.23	0.85
XM_028874912.2	2534	Actr3	185.21	0.84	0.03	121.65	0.42	0.72
XM_028888386.2	2255	Tapbpl	97.25	0.84	0.03	76.47	0.72	0.37
XM_028888108.1	1259	Hmgn2	90.01	0.83	0.03	87.93	0.6	0.54
XM_028854703.2	3599	Ctnnb1	59.01	0.83	0.03	37.29	0.57	0.51
XM_028885862.2	2063	Rhof	32.16	0.82	0.03	21.46	0.71	0.36
XM_028871645.2	2681	Tcirg1	23.39	0.82	0.03	21.91	0.55	0.56
XM_028880004.1	8167	Rapgef6	22.78	0.82	0.03	13.1	-0.02	0.99
XM_028880236.2	2043	Lta4h	69.39	0.81	0.03	53.54	0.24	0.84
XM_028888389.1	2888	Rgl2	45.11	0.79	0.03	36.8	0.1	0.94
XM_028893534.2	2426	Hsh2d	35.6	0.79	0.03	33.63	0.33	0.76
XM_028894929.2	7633	Crybg1	23.44	0.79	0.03	16.65	0.19	0.87
XM_028856894.2	2404	Cnp	60.74	0.78	0.03	43.51	0.63	0.47
XM_028880670.2	5925	Dnajc16	47.25	0.78	0.03	33	0.34	0.77
XM_028894151.2	4419	Zdhhc5	20.02	0.77	0.03	15.67	0.65	0.35
XM_028854246.2	3315	Sec61a1	41.81	0.76	0.03	42.16	0.95	0.18
XM_028886507.2	3377	Zmpste24	20.75	0.76	0.03	18.29	0.77	0.26
XM_028885039.2	3752	Cmtr1	19.85	0.76	0.03	15.39	0.52	0.49
XR_005091636.1	1835	LOC114688976	83.69	0.75	0.03	66.09	-0.06	0.96
XM_028893196.1	988	Atp6v0b	72.39	0.75	0.03	71.53	0.76	0.26
XM_037197981.1	1205	LOC119086439	53.68	0.74	0.03	37.92	-0.28	0.82
XM_028889007.2	5668	Phf20	11.83	-0.7	0.03	11.52	-0.89	0.11
XM_028859565.2	844	Eif3k	169.77	-0.73	0.03	174.85	0.11	0.94
XM_028885879.2	2426	Anapc5	26.74	-0.74	0.03	29.84	-0.22	0.84
XM_028886678.2	3842	Gls	16.72	-0.74	0.03	13.62	-0.04	0.98
XM_028891048.2	7843	Glg1	16.51	-0.75	0.03	17.79	-0.96	0.08
XM_028886653.2	7313	Ccdc88c	17.77	-0.76	0.03	18.6	-1.46	0.00442
XM_028868904.2	708	LOC114692876	152.4	-0.77	0.03	177.84	0.15	0.92
XM_028859693.2	453	Rpl36	127.28	-0.77	0.03	149.42	0.29	0.79
XM_028856356.2	4087	Galnt2	14.2	-0.77	0.03	17.81	-0.71	0.27
XM_028879593.2	1222	Gimap6	125.23	-0.78	0.03	121.42	-1.34	0.01
XM_037208226.1	3247	Tmem123	75.74	-0.79	0.03	73.03	-0.32	0.83
XM_028875683.2	772	Rpl15	580.67	-0.8	0.03	621.27	-0.2	0.88
XM_028880033.2	2529	Anxa6	111.07	-0.8	0.03	133.9	-1.32	0.02
XM_028885560.2	1643	Septin1	106.96	-0.8	0.03	123.05	-1.12	0.1
XM_028856231.2	3240	Anp32e	22.2	-0.8	0.03	16.69	0.27	0.8
XM_028856775.2	508	Rpl35	655.73	-0.81	0.03	686.26	-0.07	0.96
XM_028866304.2	10758	Sorl1	44.46	-0.81	0.03	54.07	-1.88	0.000552
XM_028871801.2	1572	Ndufv1	38.39	-0.81	0.03	44.18	-0.61	0.35
XM_028853745.2	2322	Rasgrp2	29.61	-0.81	0.03	39.01	-1.14	0.04
XM_028893647.2	503	Rps12	1665.16	-0.82	0.03	1565.4	0.55	0.64
XM_028862569.2	658	Rpl18a	1101.94	-0.82	0.03	1165	-0.03	0.99
XM_028865759.2	524	Rpl31	896.25	-0.82	0.03	846.71	-0.26	0.85
XM_028887783.2	1970	Rbbp7	42.63	-0.82	0.03	41	-0.19	0.86
XM_028894679.2	3365	Uhrf2	25.82	-0.82	0.03	22.93	-0.74	0.2
XM_028894598.2	533	Rpl27a	783.28	-0.84	0.03	871.68	-0.28	0.83
XM_028854008.2	454	Snrpg	104.05	-0.85	0.03	106.69	-0.39	0.71
XM_028880881.2	792	Rpl13	1049.51	-0.87	0.03	1206.26	-0.14	0.93
XM_028879592.2	1244	Gimap7	99.02	-0.88	0.03	88.67	-1.44	0.05
XM_028857459.2	4476	Bank1	10.45	-0.88	0.03	10.98	-0.43	0.73
XM_028876335.2	1306	Mdh1	36.12	-0.89	0.03	36.49	-0.27	0.83
XM_028859242.2	1270	Ech1	27.45	-0.91	0.03	27.48	-0.84	0.24
XM_028864238.2	4236	Itk	25.75	-0.91	0.03	22.81	-1.38	0.02
XM_028862032.2	1443	LOC114687375	22.87	-0.91	0.03	25.71	-0.69	0.42
XM_028857695.2	982	LOC114683399	23.08	-0.95	0.03	26.78	-0.62	0.56
XM_028889682.2	930	Nt5c	29.69	-0.97	0.03	38.78	-0.84	0.22
XM_028868389.2	5098	Plcg1	37.89	-0.98	0.03	35.36	-1.82	0.00132
XM_028864359.2	686	Mgst3	31.36	-0.98	0.03	34.3	-0.42	0.75
XM_037197407.1	2036	Pced1b	14.05	-0.98	0.03	16.33	-1.4	0.03
XM_028864489.2	1275	Fcrla	27.4	-0.99	0.03	30.72	-0.49	0.63
XM_028874650.2	1138	LOC114696723	19.48	-1.02	0.03	16.74	0.36	0.82
XM_028865205.2	1577	Polg2	12.67	-1.02	0.03	13.99	-1.4	0.05
XM_028864252.2	4839	Ebf1	14.38	-1.05	0.03	11.63	-0.76	0.66
XM_028892702.2	1705	Galk2	20.41	-1.11	0.03	19.74	-0.41	0.76
XM_028871802.2	1413	Commd10	12.38	-1.13	0.03	12.21	-0.14	0.94
XM_028892353.2	3179	Cd4	71.19	-1.15	0.03	69.67	-2.51	1.05e-05
XR_005090229.1	996	LOC119086860	14.18	-1.37	0.03	34.91	-0.48	0.77
XR_005092514.1	579	LOC119088787	45.84	-1.88	0.03	66.08	-1.33	0.44
XR_005090527.1	1327	LOC119087082	27.17	-1.88	0.03	15.62	-2.69	0.04
XM_037200805.1	1086	LOC114690500	16.71	-2.86	0.03	24.36	0.46	0.8
XM_028875302.2	858	Pla2g2a	21.71	1.81	0.04	36.7	3.11	9.32e-07
XM_037199278.1	1342	LOC114705701	80.68	1.43	0.04	33.92	-0.5	0.82
XM_028892264.2	932	Gzma	44.92	1.34	0.04	24.61	0.15	0.93
XM_028870099.2	1945	Irf7	149.59	1.32	0.04	89.94	0.15	0.94
XM_028871070.2	1090	Tnfrsf23	13.42	1.18	0.04	10.8	0.13	0.95
XR_005090405.1	562	LOC119086992	32.99	1.14	0.04	23.21	-0.2	0.92
XR_005090551.1	1198	LOC119087109	14.97	1.09	0.04	10.27	-0.1	0.96
XM_028859107.2	1446	Ifit1	48.41	1.07	0.04	34.89	1.53	0.05
XM_028861134.2	1388	Rab32	15.81	0.99	0.04	49.7	2.57	0.000155
XM_028884940.2	2217	Slc16a3	31.99	0.95	0.04	31.77	0.24	0.88
XM_028876451.2	2444	Zyx	53.1	0.92	0.04	46.67	-0.43	0.74
XM_028885047.2	2613	Zfand3	50.42	0.9	0.04	49.16	0.33	0.78
XM_028887936.2	1123	Ltb	261.6	0.89	0.04	197.89	-0.28	0.84
XM_028883945.1	8071	Tln1	143.81	0.86	0.04	127.16	0.2	0.88
XM_037199769.1	1453	LOC114687935	271.68	0.83	0.04	201.32	0.4	0.74
XM_028866296.2	2318	Hspa8	496.07	0.82	0.04	303.13	1.05	0.14
XM_028873771.2	6297	Iqgap1	83.91	0.82	0.04	71.64	-0.16	0.92
XM_028881631.2	5822	Stag2	23.71	0.82	0.04	13.95	0.43	0.7
XM_028876001.2	5791	St3gal1	22.41	0.82	0.04	16.79	0.55	0.53
XM_028889073.2	1299	Rhog	135.3	0.81	0.04	132.31	0.13	0.93
XM_037199765.1	1492	H2-Q10	73.24	0.81	0.04	59.56	0.59	0.44
XM_028860422.2	2758	Pfkl	19.75	0.81	0.04	29.12	1.27	0.03
XM_028875928.2	6380	Med14	14.73	0.81	0.04	10.29	0.43	0.62
XM_037201278.1	3748	Unc13d	42.94	0.8	0.04	37.91	-0.22	0.87
XM_028860145.2	2765	Kiaa2013	18.16	0.8	0.04	16.12	0.42	0.64
XM_028888539.2	2132	Atp6ap1	80.72	0.78	0.04	62.33	0.55	0.54
XM_028856814.2	1908	Rab5c	110.35	0.77	0.04	93.86	1.01	0.11
XM_028893783.2	1722	Rbm38	51.66	0.77	0.04	46.34	0.84	0.22
XM_028858756.2	3104	Senp2	16.51	0.77	0.04	12.35	0.54	0.51
XM_037201132.1	3786	Msl1	47.26	0.76	0.04	28.84	-0.64	0.5
XM_028885326.2	1971	Ogfr	53.01	0.75	0.04	47.85	0.5	0.55
XM_028855390.2	2087	Gbp4	57.2	0.74	0.04	47.22	-0.11	0.94
XM_028856564.2	2151	Rab35	40.53	0.74	0.04	34.98	0.29	0.79
XM_028886078.2	1987	Fbxw2	34.5	0.74	0.04	25.94	0.59	0.39
XM_028867501.2	2274	LOC114691922	24.06	0.74	0.04	13.86	0.78	0.21
XM_028881363.2	3012	Gripap1	27.01	0.72	0.04	22.56	0.36	0.68
XM_028889599.2	4574	Msl1	17.15	0.72	0.04	15.36	0.11	0.94
XM_028875227.2	2046	Tra2b	34.82	0.71	0.04	28.78	1.36	0.00204
XM_028883414.2	5509	LOC114702841	23.75	0.71	0.04	10.67	0.76	0.26
XM_028890532.2	3418	Ap2b1	19.59	0.7	0.04	20.3	0.88	0.26
XM_028866004.2	4487	Trpc1	17.93	0.68	0.04	13.3	-0.01	0.99
XM_028888631.2	8372	Arid1b	10.92	-0.69	0.04	11.8	-0.87	0.12
XM_028886962.2	2751	Qars1	34.73	-0.7	0.04	39.63	-0.8	0.15
XM_028868365.2	2694	Man1a1	23.27	-0.71	0.04	24.2	0.68	0.53
XM_028859291.1	1011	Eef1d	90.05	-0.72	0.04	90.38	-0.13	0.92
XM_028866883.2	2511	Pigs	24.46	-0.72	0.04	30.66	-0.68	0.28
XM_028894586.2	1248	Eif3f	125.87	-0.73	0.04	144.97	-0.48	0.61
XM_037204310.1	907	LOC119087722	59.7	-0.73	0.04	74.06	0.48	0.56
XM_028894462.2	2461	Cdkn1b	50.63	-0.73	0.04	39.96	-1.01	0.11
XM_028866873.2	602	Rpl23a	1270.53	-0.8	0.04	1263.05	0.02	0.99
XM_028862335.2	501	Rpl28	1140.48	-0.8	0.04	1230.23	0.11	0.95
XM_028875430.2	663	Rpl11	633.3	-0.8	0.04	681.95	-0.35	0.79
XM_028882591.2	3151	Ubtf	15.74	-0.8	0.04	18.28	-0.78	0.56
XM_028859907.1	377	Rps28	703.12	-0.81	0.04	798.25	-0.14	0.93
XM_028871808.2	806	LOC114694764	415.68	-0.81	0.04	484.44	-0.8	0.31
XM_028887006.2	2280	Asnsd1	16.31	-0.82	0.04	13.43	-0.27	0.83
XM_028867220.2	4214	Smc4	22.41	-0.83	0.04	18.64	-0.37	0.67
XM_028858575.1	1261	Cirbp	41.63	-0.85	0.04	41.02	-0.81	0.2
XM_037205591.1	431	LOC114681874	175.93	-0.89	0.04	210.28	0.1	0.95
XM_028893117.2	1396	Stk16	25.87	-0.89	0.04	26.45	-0.82	0.23
XM_028856744.2	1685	Samm50	17.6	-0.93	0.04	18.55	-0.27	0.84
XM_028885884.2	1467	P2rx4	16.51	-0.95	0.04	18.35	-1.66	0.01
XM_037209046.1	3592	Smim14	13.67	-0.95	0.04	11.34	0.07	0.97
XM_028869647.2	1308	Lyz2	214.47	-0.97	0.04	310.86	-1.27	0.08
XM_028858648.2	823	C5H19orf53	33.26	-0.97	0.04	37.18	-0.46	0.64
XM_028886155.2	2638	Psap	10.85	-1.05	0.04	14.74	-1.46	0.03
XM_028856086.2	1614	Mettl17	11.9	-1.12	0.04	12.47	-1.62	0.02
XM_028884079.2	1394	Sit1	24.57	-1.13	0.04	24.87	-2.97	2.25e-06
XM_028888784.2	3639	LOC114706394	15.49	-1.13	0.04	21.47	0.28	0.86
XM_028885082.2	1457	Ldoc1	11.55	-1.16	0.04	11.58	-0.88	0.41
XM_028875637.2	732	Cetn3	21.35	-1.18	0.04	17.74	-0.36	0.84
XM_028888393.2	726	Smim29	17.58	-1.19	0.04	20.52	-1.6	0.07
XR_005091914.1	496	LOC119088290	42.55	-1.21	0.04	23.37	0.07	0.97
XM_028873626.2	697	Dpy30	19.65	-1.21	0.04	18.82	-1.07	0.34
XM_028854575.2	1129	Metrn	11.87	-1.22	0.04	14.57	-1.55	0.07
XM_037209859.1	898	LOC114687105	13.74	-1.44	0.04	17.64	-1.15	0.26
XM_037201922.1	747	LOC119087226	14.44	-1.47	0.04	18.25	-1.79	0.06
XR_005089840.1	388	LOC119086531	1229.65	-1.74	0.04	365.36	0.16	0.95
XR_005090015.1	424	LOC119086670	15.14	1.74	0.05	66.09	3.24	6.98e-05
XM_028875463.2	1697	Rsrp1	34.59	1.01	0.05	26.8	1.48	0.1
XM_028878545.1	3415	Sirpa	13.48	0.94	0.05	12.95	-0.93	0.23
XM_028869645.2	1311	Lyz2	5916.03	0.92	0.05	4407.04	-0.41	0.77
XM_028888082.2	4624	Plcb2	27.98	0.89	0.05	26.15	-0.41	0.75
XM_028891829.2	2619	Snx20	30.88	0.88	0.05	23.53	-0.02	0.99
XM_028889958.2	2065	Cept1	17.41	0.82	0.05	14.22	1.35	0.02
XM_037210579.1	1464	Aldoa	294.7	0.81	0.05	273.74	0.57	0.56
XM_028860993.2	848	Pfn1	676.05	0.8	0.05	615.64	0.51	0.62
XR_005090103.1	1181	H2-Q10	105.42	0.8	0.05	86.94	0.15	0.91
XM_028860317.2	2937	Ezr	99.92	0.8	0.05	78.23	0.44	0.69
XM_037210409.1	4184	Itgal	114.56	0.78	0.05	97.59	-0.64	0.52
XM_028861428.2	1425	Gnb2	159.14	0.77	0.05	145.78	0.3	0.82
XR_003732866.2	2366	LOC114681130	19.39	0.77	0.05	14.53	0.07	0.95
XR_005090525.1	1558	LOC114687019	349.8	0.76	0.05	231.11	0.71	0.45
XM_028869503.2	1391	LOC114693205	237.17	0.76	0.05	190.22	0.78	0.31
XM_028885495.2	1390	Ppp4c	68.91	0.75	0.05	58.34	0.52	0.51
XM_028856557.2	2101	Prkab1	37.46	0.75	0.05	38.52	-0.21	0.85
XM_028892089.2	1651	Il2rg	92.81	0.74	0.05	70.44	0.1	0.94
XM_028865090.2	2348	Scamp2	50.04	0.74	0.05	42.02	0.57	0.47
XM_028871157.2	3232	Josd1	21.42	0.74	0.05	19.53	0.21	0.85
XM_028890779.2	4363	Rusc1	17.22	0.74	0.05	16.38	0.03	0.98
XM_028872066.2	1368	Atg3	65	0.73	0.05	54.71	0.33	0.75
XM_037208726.1	3843	Ogdhl	65.8	0.72	0.05	48.01	0.09	0.95
XM_028884652.2	2801	Fnbp1	36.96	0.72	0.05	32.76	-0.07	0.96
XM_028856430.2	3048	Susd1	21.22	0.72	0.05	19.7	-0.03	0.98
XM_028861383.2	3625	Trak1	17.2	0.72	0.05	15.24	-0.1	0.94
XM_028873034.2	5514	Ppp1r12a	15.2	0.72	0.05	11.4	-0.27	0.83
XM_028854486.2	2224	Akirin1	44.49	0.71	0.05	33.28	0.68	0.27
XM_028867582.2	5910	Edem1	29.45	0.71	0.05	22.17	0.3	0.81
XM_037206076.1	4509	Cyld	24.26	0.71	0.05	16.56	0.61	0.43
XM_028870327.2	1966	Pnpla2	32.57	0.7	0.05	28.2	0.19	0.86
XM_028887832.2	5703	Ccny	14.17	-0.66	0.05	13.54	-0.17	0.88
XM_028877887.2	1284	Eif3m	68.87	-0.69	0.05	71.84	-0.15	0.91
XM_028862954.2	4430	Pip5k1c	17.19	-0.69	0.05	23.37	-1.33	0.00312
XM_028885826.2	4391	Hip1r	17.04	-0.7	0.05	23	-0.63	0.48
XM_028880235.2	3177	Elk3	19.09	-0.71	0.05	22.9	-0.13	0.93
XM_028865446.2	3932	Parp1	17.68	-0.72	0.05	18.98	-0.49	0.54
XM_028855155.2	4228	Pcmtd1	15.11	-0.73	0.05	13.21	-1	0.14
XM_028884758.2	657	Rpl12	1654.58	-0.76	0.05	1539.92	0.45	0.75
XM_028856842.2	435	Rpl34	780.64	-0.77	0.05	885.14	-0.17	0.91
XM_028873063.2	1506	Nap1l1	33.55	-0.79	0.05	28.29	0.02	0.99
XM_028883160.2	730	Rps7	858.42	-0.8	0.05	925.82	-0.1	0.95
XM_028878827.2	1278	Pebp1	27	-0.84	0.05	26.38	0.13	0.93
XM_028870126.2	3964	Gtf2i	11.34	-0.84	0.05	11.04	-0.98	0.1
XM_028870195.2	2572	Stx2	13.24	-0.86	0.05	16.16	-0.74	0.29
XM_028866114.2	4369	Wdr91	11.53	-0.89	0.05	13.58	-1.03	0.07
XM_037207548.1	1647	Cd3e	96.93	-0.95	0.05	100.18	-1.93	0.00347
XM_028873212.2	1766	Sms	12	-0.95	0.05	11.79	-0.47	0.72
XM_028892219.2	1562	Haus4	19.47	-0.96	0.05	25.71	-1.45	0.02
XM_037203768.1	1351	Mturn	19.12	-0.98	0.05	25.66	-0.73	0.5
XM_028885048.2	1931	Glo1	13.26	-0.98	0.05	12.68	-0.13	0.94
XM_028855951.2	2103	Niban3	13.87	-1.01	0.05	15.84	-0.76	0.56
XM_028875275.2	1366	Akr7a2	10.55	-1.12	0.05	13.56	-0.79	0.44
XM_028869691.2	1373	Echs1	13.06	-1.13	0.05	17.1	-0.54	0.63
XM_037208281.1	833	LOC119088460	23.04	-1.32	0.05	24.82	-2.58	0.00271
XR_003735335.1	151	Rs5-8s1	6283.06	-1.65	0.05	1963.23	0.31	0.92
XR_005092611.1	933	Sp100	11.57	2.59	0.06	11.4	-1.51	0.43
XM_028860309.2	2022	Mx2	30.29	1.29	0.06	23.88	0.34	0.84
XM_037198005.1	1896	LOC119086450	13.96	1.17	0.06	100.11	2.89	0.000417
XM_028853874.1	1492	Amdhd2	11.94	1.08	0.06	10.12	0.12	0.94
XM_028862140.2	912	LOC114687529	22.86	1.03	0.06	20.6	-0.05	0.98
XM_028893819.2	978	Ethe1	23.08	1	0.06	21.65	0.98	0.22
XM_028874521.2	1109	Atg101	25.29	0.88	0.06	21.74	0.66	0.41
XM_028879405.2	1166	LOC114699991	27.91	0.87	0.06	27.43	0.04	0.98
XM_028879886.2	4459	Xpo6	46.65	0.79	0.06	35.32	-0.08	0.95
XM_028861032.2	1572	LOC114686366	78.79	0.78	0.06	63.36	0.41	0.67
XM_028891472.2	2625	Tnfrsf14	76.41	0.78	0.06	58.95	-0.23	0.84
XM_028889400.2	1862	Pgam1	59.98	0.78	0.06	54.91	0.69	0.4
XM_028894474.2	3549	Crebl2	20.77	0.78	0.06	10.91	0.32	0.82
XM_037206028.1	2992	Pkn1	29.06	0.77	0.06	17.63	-0.21	0.93
XM_028862291.2	675	Eif1	423.47	0.76	0.06	329.44	0.87	0.22
XM_028871654.2	4005	Ap3b1	14.02	0.75	0.06	12.63	0.39	0.72
XM_028866098.2	3752	Mtpn	78.36	0.74	0.06	68.45	1.09	0.1
XM_028884810.2	3587	Uba1	67.09	0.74	0.06	55.37	0.47	0.65
XM_028891822.1	2351	Brd7	33.41	0.69	0.06	26.35	0.37	0.69
XM_028866766.2	4502	Crk	15.35	0.69	0.06	10.68	0.72	0.27
XM_028854998.2	2012	Sqstm1	53.96	0.68	0.06	50.55	0.29	0.81
XM_028871571.2	3209	Ints8	18.23	0.67	0.06	10.45	0.78	0.2
XM_028856998.2	3235	Chfr	16	0.67	0.06	13.33	-0.02	0.99
XM_037203996.1	2758	Irag2	18.66	-0.67	0.06	22.59	-0.88	0.11
XM_028887706.2	4143	Mapre2	15.12	-0.68	0.06	17.88	-0.8	0.28
XM_028875823.2	4046	Swap70	39.11	-0.7	0.06	46.34	-0.38	0.75
XM_028863282.2	2663	Hnrnpa0	20.66	-0.71	0.06	18.06	0.32	0.76
XM_028881759.2	2700	Arhgap15	24.51	-0.72	0.06	26.03	-1.14	0.03
XM_028879072.2	4167	Ets1	196.29	-0.74	0.06	166.2	-0.92	0.27
XM_037200802.1	2714	LOC114707032	26.2	-0.76	0.06	36.84	-1.94	4.94e-05
XM_028856867.2	565	Rpl27	564.33	-0.77	0.06	617.7	-0.29	0.83
XM_028864835.2	2496	Nxpe4	18.41	-0.77	0.06	17.81	-1.71	0.00705
XM_028876231.2	1218	Ptma	313.96	-0.78	0.06	294.85	0.07	0.96
XM_028878130.1	2542	Fam118a	12.22	-0.78	0.06	13.46	-0.77	0.29
XM_028885692.2	739	LOC114704433	53.99	-0.81	0.06	60.35	-1.49	0.00318
XM_028885098.2	5665	Znf217	10.25	-0.81	0.06	10	-4.18	4.43e-06
XM_028877587.2	1998	Ppp3cc	13.92	-0.87	0.06	14.2	-1.22	0.07
XM_028887662.2	2130	Lck	117.07	-0.89	0.06	114.57	-1.59	0.02
XM_028865452.2	2011	Psen2	14.26	-0.9	0.06	14.81	-0.72	0.4
XM_028853655.2	2614	Lrrc45	10.53	-0.9	0.06	14.05	-1.4	0.01
XM_028881312.2	2034	Ing1	16.37	-0.94	0.06	24.17	-1.34	0.02
XM_028858921.2	1374	Mybpc2	16.04	-0.94	0.06	17.35	-0.49	0.69
XM_028875056.2	2307	Add3	15.12	-0.94	0.06	17.37	-1.88	0.000393
XM_037208083.1	1612	LOC114685946	21.86	-0.98	0.06	27.43	-2.06	0.000813
XM_028875429.2	956	Id3	18.96	-1.07	0.06	27.3	-0.86	0.42
XM_037207549.1	1646	Cd3e	11.79	-1.21	0.06	12.08	-2.77	0.00346
XM_037202194.1	1778	Lilra5	19.35	-1.33	0.06	19.93	-3.4	2.21e-09
XM_037211673.1	381	Eif4ebp1	14.06	1.8	0.07	25.1	2.39	0.01
XM_028880139.2	1846	Mrgprx2	20.81	1.24	0.07	16.48	-0.22	0.88
XM_028876452.2	2436	Zyx	18.48	1.07	0.07	19.93	0.27	0.9
XR_003733823.2	603	LOC114688935	33.46	1.02	0.07	23.08	-0.08	0.97
XM_028857836.2	1574	LOC114683504	16.56	0.98	0.07	16.24	1.18	0.09
XM_037197653.1	2659	Cyth4	14.23	0.98	0.07	15.48	0.02	0.99
XR_005091159.1	795	LOC119087652	23.12	0.97	0.07	11.87	0.67	0.63
XM_037204873.1	1299	LOC114703404	35.86	0.93	0.07	19.9	-0.2	0.91
XM_037199757.1	1588	LOC114686366	28.14	0.91	0.07	22.32	0.9	0.3
XM_028885904.1	1066	Vps29	23.94	0.91	0.07	16.67	0.62	0.54
XM_028861792.2	1438	Ier2	32.73	0.83	0.07	33.43	0.23	0.85
XM_028854937.2	842	Ap2s1	105.39	0.79	0.07	81.4	1.26	0.02
XM_028880052.2	1907	Mfap3	16.95	0.79	0.07	12.51	0.28	0.84
XM_028888719.2	2282	Xaf1	13.72	0.79	0.07	10	0.7	0.4
XM_028860073.2	4355	Arhgap30	105.6	0.75	0.07	81.81	-0.05	0.97
XM_028876087.2	7164	Tmed8	24.32	0.75	0.07	17.59	0.21	0.88
XM_028857402.2	3077	Cdc42se1	63.5	0.74	0.07	59.35	0.22	0.86
XM_028861196.2	1085	Mob3a	46.47	0.74	0.07	42	-0.16	0.9
XM_028890280.2	2408	Rac1	87.7	0.73	0.07	73.45	0.33	0.78
XM_028872846.2	6222	Klf13	53.08	0.73	0.07	37.98	0.23	0.86
XM_028888541.1	2242	Gdi1	122.82	0.71	0.07	99.96	0.26	0.83
XM_028859963.2	5552	Cic	13.11	0.71	0.07	12.02	-0.51	0.59
XM_037204252.1	2712	Raf1	53.27	0.69	0.07	40.45	-0.31	0.78
XM_028863576.2	2225	Grk6	38.34	0.68	0.07	39.63	-0.78	0.34
XM_028870744.2	2312	Maea	31.99	0.68	0.07	30.89	1.23	0.01
XM_028862687.2	3072	LOC114688078	18.46	0.68	0.07	25.32	0.77	0.3
XM_028892198.2	2988	Lrp10	40.05	0.67	0.07	41.67	0.4	0.69
XM_028868268.2	2793	Tm9sf2	41.58	0.66	0.07	35.02	0.87	0.18
XM_037200044.1	2469	Daxx	27.11	0.66	0.07	21.75	0.61	0.43
XM_028872876.2	3062	C8BH16orf72	18.67	0.66	0.07	12.29	0.54	0.53
XM_028863729.2	2334	LOC114689447	29.36	-0.64	0.07	34.58	-1.42	0.00366
XM_028859691.2	455	Rpl36	128.36	-0.66	0.07	156.79	0.26	0.83
XM_028890088.2	4561	Tcof1	17.42	-0.68	0.07	20.04	-0.64	0.37
XM_037198198.1	15437	Herc2	11.98	-0.68	0.07	11.36	-0.69	0.34
XM_028879127.2	1867	Ifi44	46.47	-0.7	0.07	44.31	-0.77	0.34
XM_028867497.2	624	Rpl24	460.76	-0.71	0.07	481.6	-0.09	0.95
XM_028888502.2	801	Rpl10	1355.97	-0.72	0.07	1256.22	0.34	0.83
XM_028858546.2	584	Rps15	431.58	-0.72	0.07	551.48	0.08	0.96
XM_037210957.1	4754	Nedd4	24	-0.75	0.07	23.29	-0.11	0.93
XM_028865349.2	4436	Ptpn18	12.74	-0.79	0.07	11.66	-1.9	0.0013
XM_028854867.2	1705	Prkx	13.43	-0.9	0.07	13.47	-0.59	0.62
XM_028888264.2	1971	Lgmn	13.83	-0.99	0.07	15.24	-1.33	0.08
XM_028865200.2	1003	Milr1	20.51	-1.06	0.07	27.58	-1.33	0.05
XM_037209848.1	912	LOC114687105	17.42	-1.14	0.07	22.79	-0.43	0.77
XM_028887967.2	692	Aif1	21.84	-1.32	0.07	29.46	-0.53	0.75
XM_028888324.2	661	Cuta	13.5	-1.4	0.07	15.24	-1.02	0.5
XM_028865900.2	1908	Sod3	18.94	1.22	0.08	17.9	0.72	0.52
XM_028867846.2	1463	Igsf6	14.22	1	0.08	19.82	1.07	0.29
XM_028858597.2	3961	Arhgap45	10.97	0.88	0.08	11.67	-0.1	0.95
XM_028894207.2	929	Ube2l6	37.88	0.85	0.08	19.33	1.01	0.23
XM_028872349.2	3768	Mtus1	22.05	0.79	0.08	17.56	-1.81	0.000756
XM_028886925.2	1883	Shisa5	90.46	0.77	0.08	82.89	-0.33	0.77
XM_028893607.2	1295	Fbxo6	25.25	0.77	0.08	24.16	0.37	0.71
XM_028886198.2	1923	Arhgap9	88.78	0.76	0.08	74.75	0.02	0.99
XM_028870723.2	1960	Ctsd	130.69	0.75	0.08	115.19	0.72	0.4
XM_028864500.2	3559	Plekho2	38.54	0.75	0.08	37.17	-0.16	0.9
XM_028895302.2	2223	Gnai2	279.95	0.73	0.08	257.45	0.3	0.83
XM_028892656.1	1080	Atp6v1g1	205.22	0.73	0.08	154.57	0.48	0.62
XM_028875281.2	1333	Capzb	211.23	0.72	0.08	195.01	0.37	0.75
XM_028880288.1	2793	Hsp90b1	129.38	0.72	0.08	107.98	0.5	0.64
XM_037210412.1	4181	Itgal	53.05	0.72	0.08	50.51	-0.72	0.45
XM_028859013.2	1403	Degs1	39.9	0.72	0.08	32.21	0.53	0.54
XM_028862836.2	1545	Ddx39a	27.68	0.71	0.08	24.17	0.48	0.56
XR_003736773.2	2621	Tnfrsf14	23.04	0.71	0.08	20.04	-0.54	0.57
XM_028894098.2	2785	Acap2	18.85	0.71	0.08	14.37	0.56	0.56
XM_028871214.2	8848	Ep300	27.98	0.7	0.08	23.25	-0.17	0.91
XM_028866305.2	4632	Sc5d	10.97	0.68	0.08	12.23	0.48	0.62
XM_028886256.1	1948	Dctn2	25.37	0.67	0.08	23.38	0.38	0.7
XM_037198535.1	10457	Tnrc18	12.98	0.67	0.08	12.96	-0.22	0.86
XM_028875809.2	4446	Nceh1	16.56	0.66	0.08	13.38	0.18	0.88
XM_028860755.2	1513	Prdx3	44.57	0.64	0.08	35.34	0.52	0.48
XM_028880057.2	3981	Larp1	19.49	0.64	0.08	18.6	1	0.1
XM_028880719.2	1076	Sdhb	50.98	0.63	0.08	45.91	0.48	0.54
XM_028892476.2	1080	LOC114708910	64.49	-0.6	0.08	64.78	-0.28	0.78
XM_028884413.2	4460	Mtmr12	17.32	-0.6	0.08	17.94	-0.6	0.34
XM_028861257.2	1018	Rtraf	50.56	-0.65	0.08	53.29	-0.03	0.98
XM_028854753.2	5027	Mlec	26.5	-0.65	0.08	25.98	-0.47	0.57
XM_028858892.2	518	Rpl36al	174.9	-0.66	0.08	195.01	0.02	0.98
XM_028879645.2	2171	LOC114700138	44.19	-0.67	0.08	40.75	-1.36	0.03
XM_028853968.2	1016	Rps2	513.88	-0.68	0.08	578.17	0.02	0.99
XM_037203202.1	7282	Rere	16.47	-0.68	0.08	17.33	-0.77	0.22
XM_028878301.1	906	Tpt1	2099.16	-0.72	0.08	2204.62	0.33	0.83
XM_028889995.2	4252	Trim35	10.71	-0.72	0.08	13.48	-0.63	0.43
XM_028861697.2	1873	Tubb	164.44	-0.78	0.08	167.31	-0.32	0.79
XM_028858303.2	883	Etfb	33.87	-0.78	0.08	40.08	-0.27	0.83
XM_028874486.2	2793	Itgb7	50.2	-0.79	0.08	69.81	-1.68	0.00095
XM_028859294.1	939	Eef1d	36.85	-0.81	0.08	40.7	-0.1	0.94
XM_028872191.2	988	Mgst1	70.43	-0.87	0.08	84.92	-1.95	0.000993
XM_028865033.2	927	Commd4	23.56	-0.87	0.08	29.25	-0.79	0.34
XM_028873203.2	1005	Prdx4	15.88	-0.99	0.08	17.5	-0.13	0.95
XM_028891031.2	1409	Ssbp2	12.56	-1.01	0.08	12.75	-1.51	0.08
XM_037209860.1	893	LOC114687105	26.12	-1.02	0.08	43.86	-1.01	0.2
XM_028871623.2	1318	Decr1	10.72	-1.06	0.08	11.7	-0.17	0.93
XR_005091399.1	969	LOC119087890	19.06	-1.23	0.08	18.55	-0.72	0.63
XM_028878620.2	950	Rgcc	14.18	-1.34	0.08	17.11	1.04	0.29
XR_005091282.1	1451	LOC119087807	31.69	1.64	0.09	12.22	1.43	0.14
XM_028876457.2	2350	Zyx	20.19	0.84	0.09	16.6	0.51	0.65
XM_028880438.2	1288	Atp6v1e1	134.15	0.82	0.09	130.38	1.18	0.22
XM_028886172.2	1301	Ppa1	53.2	0.81	0.09	39.06	1.01	0.13
XM_028891823.1	1185	Glul	23.09	0.8	0.09	17.01	0.85	0.26
XM_028875382.2	2046	Cdc42	15.32	0.79	0.09	14.36	0.44	0.68
XM_028863301.2	1516	H2-Q10	31.26	0.74	0.09	23.66	0.35	0.77
XM_028861048.2	1281	LOC114686366	126.07	0.72	0.09	91.36	0.13	0.93
XM_028891487.2	2913	Gnb1	73.65	0.72	0.09	52.1	0.7	0.39
XM_028888499.2	1748	Tafazzin	17.51	0.72	0.09	11.46	-0.28	0.85
XM_028869702.2	1226	LOC114693366	32.59	0.71	0.09	24.89	0.38	0.7
XM_028879217.2	7361	Abhd2	13.83	0.71	0.09	11.16	-0.38	0.77
XM_028886979.1	2165	Rhoa	159.54	0.7	0.09	147.25	0.79	0.33
XM_028854140.2	2184	Rab7a	104.66	0.68	0.09	91.5	0.43	0.69
XM_028882169.2	2450	Serp1	58.33	0.67	0.09	52.65	1.12	0.06
XM_028864716.2	1850	Mbd2	39.6	0.65	0.09	35.75	0.28	0.79
XM_028894004.2	3574	Ell2	29.78	0.65	0.09	20.66	0.93	0.12
XM_028890688.2	2984	Cdc5l	31.09	-0.59	0.09	29.62	-0.37	0.68
XM_028865606.2	2225	Polr2m	28.7	-0.61	0.09	29.72	-0.17	0.89
XM_028890796.2	1628	Ilf2	43.66	-0.62	0.09	43.58	-0.18	0.87
XM_028891825.2	4420	Adcy7	21.45	-0.62	0.09	23.61	-1.57	0.00129
XM_028891560.2	4657	Rtn4	11.14	-0.64	0.09	10.37	0.29	0.8
XM_028889721.2	944	Prdx1	63.64	-0.65	0.09	59.98	0.74	0.36
XM_028866734.2	2818	Rpa1	26.08	-0.67	0.09	23.31	-0.63	0.35
XM_028877102.2	3338	Gart	15.28	-0.71	0.09	15.05	-0.45	0.65
XM_028878139.2	1957	Atxn10	18.58	-0.72	0.09	18.67	-0.1	0.94
XM_028867052.2	2305	Gypc	16.67	-0.74	0.09	13.95	0.9	0.17
XM_028867398.2	1054	Rpl5	34.04	-0.76	0.09	39.5	-0.05	0.97
XM_028865197.2	3594	Pecam1	13.58	-0.78	0.09	16.39	-0.64	0.45
XM_028878126.2	2544	Kiaa0930	20.84	-0.79	0.09	29.83	-1.21	0.02
XM_028872259.2	677	Ifitm2	168.7	-0.82	0.09	137.52	-0.82	0.3
XM_028854127.2	1495	Hmces	19.8	-0.86	0.09	21.92	-0.71	0.41
XM_028859698.2	1765	Ubxn6	11.7	-0.87	0.09	15.28	-0.62	0.51
XM_028857400.1	981	Oaz3	44.27	-1.06	0.09	66.94	0.36	0.85
XM_037200806.1	1080	Cd300c2	23.92	-1.35	0.09	29.18	-0.64	0.64
XR_003736093.2	111	LOC114703137	744.27	-1.38	0.09	301.39	0.13	0.96
XM_028894076.2	1204	Pigx	14.73	0.93	0.1	12.02	0.25	0.87
XM_028859124.2	724	Med29	23.21	0.91	0.1	21.27	0.83	0.38
XM_037201793.1	1469	LOC114688816	11.83	0.91	0.1	10.38	-0.2	0.9
XM_028866101.2	1991	Lactb	14.85	0.86	0.1	12.91	0.34	0.81
XM_028887532.2	2776	Bcl2l1	17.08	0.85	0.1	11.84	1.92	0.000954
XM_028888167.2	1325	Taf12	17.06	0.83	0.1	13.4	0.46	0.72
XM_028866884.2	1385	Unc119	30.86	0.79	0.1	31.63	0.09	0.95
XM_028884971.2	1967	LOC114703917	122.72	0.77	0.1	184.14	1.14	0.21
XM_028877908.2	1543	Lmo2	40.54	0.77	0.1	37.11	0.17	0.89
XM_028887917.2	1585	Gpsm3	125.13	0.74	0.1	119.31	-0.07	0.96
XM_028856257.2	1438	Plekho1	39.17	0.74	0.1	30.44	0.05	0.97
XM_028869437.2	6797	Kdm6b	11.62	0.73	0.1	11.42	-1.49	0.0031
XM_037207041.1	1139	LOC114707432	37.18	0.71	0.1	36.21	0.09	0.94
XM_028863794.2	3624	Syk	66.97	0.7	0.1	67.77	0.31	0.83
XM_037197939.1	2946	Adgre4	22.13	0.69	0.1	22.57	-0.08	0.95
XM_037197310.1	1573	Nfe2	63.63	0.68	0.1	52.53	0.32	0.81
XM_028862148.2	1828	Cr1l	79.65	0.66	0.1	72.63	-0.05	0.97
XM_028888659.2	2231	Ccnl1	21.36	0.66	0.1	18.8	-0.02	0.99
XM_028866676.2	1912	LOC114691379	30.78	0.64	0.1	25.9	-0.17	0.89
XM_028886080.2	1974	Psmd5	30.01	0.64	0.1	22.39	0.33	0.74
XM_028871104.2	3058	Gga1	17.45	0.63	0.1	17.69	0.15	0.9
XM_037203290.1	3561	Ccnl2	17.82	0.61	0.1	11.12	0.14	0.92
XM_028865085.2	3069	LOC114690337	20.37	0.58	0.1	15.24	0.02	0.99
XM_028867921.2	1251	Eif3h	116.68	-0.62	0.1	128.19	-0.25	0.83
XM_028886961.2	1673	Impdh2	54.22	-0.62	0.1	61.26	-0.03	0.98
XM_028860649.2	1080	LOC114686000	57.36	-0.64	0.1	71.25	-0.79	0.25
XM_028859535.2	2794	Map4k1	51.83	-0.64	0.1	63.91	-0.56	0.56
XM_028865126.2	2602	Pou2af1	27.44	-0.65	0.1	28.64	0.36	0.76
XM_028867854.2	2844	Gga2	22.97	-0.65	0.1	23.55	-0.78	0.2
XM_028867310.2	2227	Hsd17b11	18.81	-0.69	0.1	18.58	-0.77	0.25
XM_028866552.2	2860	Cxcr5	14.35	-0.69	0.1	18.1	0.00302	1
XM_037200741.1	2737	Trpv2	16.13	-0.71	0.1	17.24	-2.03	0.000184
XM_028865758.2	4153	Tbc1d8	10.37	-0.71	0.1	14.18	-1.67	0.00657
XM_028876154.2	904	LOC114697806	62.68	-0.75	0.1	73.22	0.1	0.96
XM_028885520.2	2183	Hirip3	16.65	-0.76	0.1	16.32	-0.71	0.33
XM_028860432.2	3043	Icoslg	12.82	-0.76	0.1	18.55	0.56	0.67
XM_028857941.2	2426	Bscl2	11.98	-0.76	0.1	13.49	-0.85	0.25
XM_028893047.2	2439	Cnppd1	13.4	-0.78	0.1	15.15	-0.07	0.96
XM_028878402.2	1715	Tsc22d1	60.22	-0.84	0.1	85.91	0.07	0.97
XM_028892544.2	2843	Septin9	17.53	-0.86	0.1	28.34	-1.3	0.02
XM_028869018.2	579	Atp5mc1	43.87	-0.87	0.1	43.5	0.08	0.96
XM_028874323.2	1622	Sumo3	12.21	-0.88	0.1	14.37	-0.43	0.74
XM_028865199.2	1121	Milr1	33.31	-0.89	0.1	43.3	-1.57	0.00428
XM_028853748.2	2300	Rasgrp2	10.61	-0.91	0.1	17.25	-0.44	0.71
XM_028862150.2	801	Tmem243	23.52	-0.95	0.1	18.69	-0.43	0.77
XM_028856860.1	1307	Lef1	21.14	-0.98	0.1	28.48	-2.1	0.000219
XM_037207372.1	1761	Tpm1	24.84	-1.11	0.1	35.84	0.02	0.99
XM_037209855.1	881	LOC114687105	14.93	-1.11	0.1	18.23	-0.63	0.62
XM_037196878.1	1256	LOC114700591	16.25	0.84	0.11	11.08	-0.06	0.97
XM_028854271.2	2868	Phaf1	13.97	0.72	0.11	11.84	-0.35	0.75
XM_028878473.2	1649	Sypl1	19.37	0.71	0.11	19.08	1.09	0.09
XM_028869876.2	2220	Ppm1m	13.44	0.7	0.11	13.88	-0.41	0.7
XM_037211365.1	4027	Ptprc	29.08	0.67	0.11	27.46	-0.64	0.42
XM_028893063.2	3193	Ppp1r21	22.46	0.67	0.11	15.61	0.83	0.15
XM_028876129.2	3684	Actn1	30.29	0.66	0.11	26.71	-0.57	0.56
XM_028887541.2	1539	Hm13	47.85	0.62	0.11	53.22	0.95	0.1
XM_028861231.2	3922	Rnf20	26.12	0.61	0.11	21.79	0.34	0.73
XM_028888129.2	5143	Eya3	11.61	0.59	0.11	10.1	0.42	0.64
XM_028880921.2	5644	Esyt2	16	-0.58	0.11	15.75	-0.62	0.34
XM_028866246.2	3199	Snd1	20.13	-0.59	0.11	25.2	-0.04	0.98
XM_028877269.2	1216	Cd2	61.76	-0.65	0.11	66.71	-1.22	0.07
XM_028882165.1	2284	Eif2a	16.1	-0.67	0.11	15.67	-0.24	0.84
XM_028856558.1	1150	Rplp0	1847.9	-0.68	0.11	1658.08	0.7	0.54
XM_028886282.2	1392	Cdk4	24.84	-0.76	0.11	28.78	-0.24	0.85
XM_028884602.2	1684	Ube2e3	34.04	-0.77	0.11	22.09	1.04	0.29
XM_028862845.1	1146	Tecr	23	-0.77	0.11	26.87	-0.4	0.69
XM_028863520.2	1209	LOC114689098	16.37	-0.89	0.11	27.99	-0.79	0.31
XM_028890799.1	1786	Msto1	10.38	-0.9	0.11	11.57	-0.77	0.48
XM_028874663.2	944	Atraid	15.68	-0.94	0.11	17.93	-0.42	0.77
XM_028891607.2	1991	Serpinb2	11.55	1.36	0.12	299.2	5.98	4.62e-09
XM_028880325.1	1238	Chpt1	31.9	0.87	0.12	19.86	0.29	0.83
XM_028864411.2	8091	F5	36.66	0.79	0.12	41.24	0.16	0.92
XM_028893254.2	2883	Sec23b	10.38	0.7	0.12	10.35	0.98	0.08
XM_037202079.1	1374	LOC114703959	27.61	0.68	0.12	17.2	0.17	0.91
XM_028861730.2	1821	H2-Q10	63.34	0.66	0.12	58.72	0.65	0.45
XM_028858500.2	1625	Anxa5	42.67	0.66	0.12	39.79	0.65	0.43
XM_028861016.2	1681	Psmb8	54.88	0.63	0.12	46.09	0.27	0.83
XM_028855572.2	1047	Rab5if	47.93	0.63	0.12	40.29	0.23	0.84
XM_028885749.2	2531	Dync1i2	22.47	0.61	0.12	17.57	0.59	0.41
XM_028889638.1	4544	Exoc7	14.18	0.59	0.12	13.1	0.1	0.94
XR_005092954.1	414	LOC119089122	140.17	0.58	0.12	118.68	-0.41	0.66
XM_028875036.1	2413	Hnrnph2	45.92	0.58	0.12	33.14	0.73	0.24
XM_028884946.2	3615	Csnk1d	37.93	0.58	0.12	32.92	0.43	0.62
XM_028868973.2	2839	Lrrc59	20.73	0.58	0.12	29.45	1.28	0.03
XM_028894568.2	3319	Aida	24.42	-0.57	0.12	23.38	-0.05	0.97
XM_028874425.1	3083	Calcoco1	20.7	-0.57	0.12	22.96	-0.63	0.42
XM_028885773.2	5255	Atp6v0a2	12.43	-0.57	0.12	14.45	-0.63	0.36
XM_028867140.2	2074	Anp32a	59.99	-0.6	0.12	66.43	-0.8	0.2
XM_028862171.2	4898	Mink1	29.88	-0.62	0.12	34.53	-0.82	0.19
XM_028862286.2	4373	Acly	13.25	-0.67	0.12	12.99	-0.41	0.65
XM_028888621.2	2519	Snx9	10.08	-0.78	0.12	11.5	-0.04	0.98
XM_028887314.2	2352	Septin6	22.48	-0.8	0.12	34.6	-1.46	0.0096
XM_037196772.1	1548	Glipr1	15.87	-0.82	0.12	17.73	-1.68	0.01
XM_037201923.1	1089	LOC119087227	22.09	-0.87	0.12	21.64	-0.81	0.4
XM_037201739.1	1247	Pilrb2	48.12	-0.89	0.12	81.83	-2.44	1.49e-08
XR_005091571.1	346	LOC119088017	64.21	-1.24	0.12	73.46	-0.21	0.93
XM_037203145.1	3729	Rcc2	11.5	1.09	0.13	10.21	-1.15	0.6
XM_028886927.2	1600	Shisa5	18.63	0.83	0.13	18.37	-0.03	0.98
XM_028856274.2	1883	Ecm1	25.85	0.82	0.13	254.79	3.36	0.00014
XM_028868576.2	1700	LOC114692668	17.9	0.8	0.13	17.38	0.59	0.47
XM_037198625.1	3632	Pxn	11.43	0.8	0.13	10.6	-1.03	0.25
XM_028888371.2	3921	Kctd20	29.39	0.78	0.13	25.26	0.2	0.9
XM_028890829.2	1298	Rit1	22.65	0.78	0.13	16.77	0.63	0.48
XM_028877913.2	2046	Cat	338.59	0.76	0.13	218.2	1.44	0.06
XM_028895320.2	1290	Naa80	23.69	0.76	0.13	17.6	0.85	0.27
XM_028853693.2	2067	Sf1	13.61	0.75	0.13	12.86	0.55	0.54
XM_028856625.2	3193	Trim26	11.15	0.69	0.13	10.65	0.54	0.51
XM_028890761.2	2131	Tpm3	168.12	0.67	0.13	155.11	0.19	0.89
XM_028893040.2	1442	Arpc2	369.53	0.66	0.13	322.31	0.42	0.71
XM_028869457.2	2113	Cd68	33.55	0.66	0.13	35.72	0.58	0.52
XM_037208807.1	2010	LOC114695194	17.9	0.66	0.13	15.31	-0.35	0.78
XM_028856639.2	1660	Ppp1r11	25.96	0.65	0.13	22.01	0.18	0.88
XM_028858187.2	8110	Ppm1a	14.25	0.65	0.13	14.94	0.15	0.91
XM_028855862.2	3586	Map3k11	16.93	0.63	0.13	17.44	0.27	0.81
XM_028892275.2	1982	Lpcat3	23.11	0.62	0.13	23.84	0.25	0.83
XM_028854262.2	1663	Atp6v0d1	63.47	0.61	0.13	65.18	0.46	0.63
XM_028885390.2	3350	Hmgcs1	17.1	0.6	0.13	17.53	0.51	0.56
XM_028857532.1	967	LOC114683296	131.91	0.59	0.13	98.14	0.7	0.3
XM_028866765.2	2942	Inpp5k	31.14	0.58	0.13	28.58	0.1	0.94
XM_028853797.2	4491	Mark2	18.29	0.58	0.13	16.59	0.16	0.89
XM_028867581.2	2903	Arl8b	20.54	0.57	0.13	19.7	1.03	0.09
XM_028886969.1	4686	Usp19	11.22	0.57	0.13	11.15	-0.06	0.96
XM_028889678.2	1039	Sumo2	68.66	-0.56	0.13	65.26	0.19	0.86
XM_028857475.2	4475	Usp22	21.31	-0.57	0.13	21.09	-0.66	0.31
XM_028864719.2	7658	Smad4	14.49	-0.58	0.13	12.13	-0.48	0.55
XM_028873802.2	3111	Btbd1	31.72	-0.59	0.13	31.39	-0.92	0.08
XM_028886169.2	6022	Eif4ebp2	26.17	-0.6	0.13	27.14	-0.55	0.49
XM_028888234.2	3438	Ubr7	15.54	-0.6	0.13	17.6	-0.42	0.63
XM_028891307.2	1053	Eef1b2	166.35	-0.62	0.13	190.33	-0.05	0.97
XM_028883248.2	2678	Set	22.19	-0.62	0.13	14.79	0.55	0.53
XM_028871019.2	893	Rpl8	1380.07	-0.63	0.13	1476.13	0.46	0.72
XM_037210671.1	3642	Tmem229b	10.12	-0.65	0.13	12.28	0.08	0.96
XM_028874466.2	1769	Tarbp2	13.31	-0.76	0.13	15.74	-0.09	0.95
XM_028858877.2	2337	Med25	39.08	-0.8	0.13	35.35	0.23	0.86
XM_028869938.2	2499	Sigirr	10.28	-0.88	0.13	13.13	-2.21	0.00199
XM_037207660.1	1028	Thyn1	11.24	-1.05	0.13	13.24	-1.53	0.07
XM_028892846.2	1306	Ctsw	15.15	-1.07	0.13	18.8	-3.23	9.13e-06
XM_037201760.1	867	Arhgap10	55.15	-1.34	0.13	49.89	-1.19	0.3
XR_005090040.1	87	LOC119086704	192.47	-1.64	0.13	84.33	-0.34	0.92
XM_028894159.2	1931	Serping1	10.92	1.15	0.14	35.02	1.01	0.43
XM_028876205.2	3078	Sp100	38.45	1.07	0.14	24.38	0.35	0.83
XM_028866882.2	1599	Aldoc	12.86	1.05	0.14	11.66	-0.09	0.96
XM_028871144.2	1476	LOC114694261	19.41	0.96	0.14	17.7	-1.42	0.08
XM_028867718.2	1245	Dtnbp1	14.8	0.79	0.14	12.02	0.72	0.48
XM_037198637.1	2780	LOC114682211	15.31	0.76	0.14	10.51	0.19	0.91
XM_037201906.1	1590	LOC114696059	17.29	0.72	0.14	10.06	0.44	0.75
XM_037197983.1	1707	LOC119086440	243.84	0.71	0.14	335.05	1.66	0.01
XM_028868467.2	2243	Zswim1	12.46	0.7	0.14	11.42	-0.02	0.99
XM_028878995.2	1828	Cd82	50.83	0.66	0.14	40.33	0.86	0.2
XM_037198416.1	892	LOC119086532	46.34	0.65	0.14	34.72	0.11	0.94
XM_028886981.2	1861	Rhoa	53.76	0.62	0.14	28.26	0.61	0.37
XM_028881324.2	1793	Was	63.45	0.6	0.14	67.89	-0.11	0.93
XM_028878920.2	2971	Arhgap1	37.9	0.6	0.14	36.39	-0.18	0.89
XM_028879237.2	1559	Dcaf13	37.7	0.6	0.14	30.21	0.52	0.51
XM_028890762.2	2211	Tpm3	34.64	0.59	0.14	32.76	0.33	0.74
XM_028879725.2	3893	Sec24c	32.48	0.58	0.14	28.02	0.36	0.73
XM_028893010.2	6032	LOC114709262	19.13	0.58	0.14	16.93	0.6	0.46
XM_028887080.2	3656	Rap2c	18.23	0.58	0.14	10.82	0.37	0.73
XM_028855855.2	3058	Elmo1	32.89	0.57	0.14	30.99	0.12	0.93
XM_028886627.2	1619	Psmc1	41.28	0.55	0.14	38.69	0.43	0.6
XM_028869014.2	3380	Ube2z	19.69	0.55	0.14	18.01	0.65	0.34
XM_028890778.2	5439	Atp8b2	13.8	-0.55	0.14	13.8	-0.83	0.15
XM_028894655.2	520	Ndufa4	106.03	-0.56	0.14	107.94	0.26	0.83
XM_028868579.2	5781	Fam53b	10.37	-0.56	0.14	11.01	-1.06	0.04
XM_028881911.2	4215	G3bp2	27.96	-0.61	0.14	21.11	-0.75	0.23
XM_028860978.2	1168	C1qbp	36.68	-0.67	0.14	36.91	0.33	0.79
XM_028868491.2	1989	Slc35c2	15.69	-0.67	0.14	18.01	-0.45	0.62
XM_028859428.2	1790	Rpia	16.37	-0.69	0.14	16.78	0.04	0.98
XM_028885550.2	2316	Maz	19.74	-0.72	0.14	18.96	-0.48	0.59
XM_028884157.2	3849	Kif2a	57.27	-0.75	0.14	76.34	-0.52	0.71
XM_028854189.2	1103	LOC114681003	24.19	-0.76	0.14	34.67	-0.53	0.55
XR_005090618.1	1339	LOC119087174	21.92	-0.8	0.14	20.13	-0.28	0.84
XM_028855927.2	944	Arl2	17.97	-0.91	0.14	19.64	-0.22	0.89
XM_028858991.2	1009	Fkbp3	16.07	-0.93	0.14	14.97	-0.13	0.94
XM_028892568.2	2237	Lgals3bp	16.22	0.82	0.15	23.64	0.41	0.82
XM_028892559.2	2884	Tmc6	11.52	0.68	0.15	12.39	-0.81	0.32
XM_028890324.2	1540	Arpc1b	498.67	0.66	0.15	495.98	0.34	0.79
XR_005091148.1	794	LOC119087647	41.28	0.66	0.15	33.61	-0.35	0.78
XM_028866209.2	2195	Irf5	48.9	0.65	0.15	43.86	-0.03	0.98
XM_028864847.1	1812	Rbm7	19.28	0.65	0.15	13.75	0.78	0.23
XM_028890085.2	2011	Dctn4	17.24	0.65	0.15	13.65	0.07	0.96
XM_037199768.1	1462	LOC114687935	71.34	0.64	0.15	57.27	0.3	0.78
XM_028886129.2	2355	LOC114704724	14.41	0.64	0.15	13.3	0.42	0.64
XM_028861044.2	1523	LOC114686366	69.59	0.62	0.15	63.21	0.46	0.6
XM_028891406.2	1701	Sdf4	96.42	0.59	0.15	83.74	0.32	0.77
XM_037198635.1	2059	Prkab1	33.8	0.58	0.15	21.47	0.32	0.83
XM_028866465.1	4135	Sidt2	31.29	0.58	0.15	44.48	1.1	0.16
XM_028855054.2	2100	Egln2	23.73	0.58	0.15	22.74	0.53	0.47
XM_037201056.1	3650	Nlrp1a	17.38	0.58	0.15	13.87	-0.32	0.76
XM_037211367.1	3867	Ptprc	14.27	0.57	0.15	13.9	-0.79	0.25
XM_028880892.2	2280	Chmp1a	30.81	0.56	0.15	27.7	0.39	0.64
XR_003734734.2	1080	LOC114694674	67.11	0.54	0.15	52.01	-0.00996	0.99
XM_028890827.2	2533	Crtc2	28.73	0.54	0.15	25.2	-0.15	0.9
XM_028874814.2	2662	Tspyl1	19.61	-0.54	0.15	20.7	-0.51	0.53
XM_028871120.1	1888	Eif3l	53.7	-0.56	0.15	59.97	-0.03	0.98
XM_028873720.1	4434	Polg	11.74	-0.57	0.15	13.03	-0.5	0.53
XM_037202453.1	2462	Tcea1	23.65	-0.58	0.15	21.17	0.14	0.92
XM_028870961.2	4522	Cpsf1	12.92	-0.58	0.15	14.76	-0.55	0.46
XM_028871690.2	1046	Nsa2	45.31	-0.59	0.15	51.52	0.1	0.94
XM_028867526.2	3815	Tomm70	13.04	-0.59	0.15	10.51	0.17	0.89
XM_028883119.2	1965	Vamp3	77.03	-0.6	0.15	81.66	-0.49	0.59
XM_028866157.2	1543	Chchd3	21.44	-0.66	0.15	25.87	-0.1	0.94
XM_028877780.2	1855	Pepd	12.71	-0.75	0.15	15.22	0.04	0.98
XM_028886217.2	14266	Lrp1	10.95	-0.81	0.15	21.77	-1.17	0.25
XM_028888123.2	2167	Themis2	12.84	-1	0.15	22.29	-2	0.00022
XM_028879966.2	780	LOC114700371	12.91	-1.06	0.15	11.02	-1.22	0.32
XM_037202192.1	2364	Lilra6	47.65	1.21	0.16	41.64	-0.54	0.76
XM_028875260.2	602	Ptrhd1	14.09	1.14	0.16	11.58	0.41	0.83
XM_028875035.2	2585	Btk	10.9	0.76	0.16	10.67	-0.38	0.75
XR_005092604.1	1283	LOC119088869	17.46	0.74	0.16	13.73	0.04	0.98
XR_005089864.1	782	LOC119086558	26.55	0.71	0.16	19.37	-0.1	0.95
XM_037199752.1	1636	LOC114686366	64.31	0.66	0.16	52.03	0.61	0.45
XM_028877319.2	4224	Nras	20.79	0.65	0.16	16.5	0.53	0.47
XM_028880432.2	2030	Bid	17.73	0.65	0.16	16.6	0.56	0.46
XM_028871811.2	1743	Tnfaip8	24.59	0.63	0.16	20.17	0.65	0.37
XM_028881499.2	1782	Gabarapl1	57.8	0.6	0.16	50.32	0.42	0.73
XM_028869038.2	4430	Nfe2l1	17.39	0.6	0.16	17.36	0.86	0.27
XM_028857385.2	2154	Ube2d3	90.32	0.58	0.16	67.17	0.91	0.16
XM_028892879.2	1850	Rab1b	71.65	0.58	0.16	73.79	0.28	0.83
XM_028890051.2	2869	Bfar	17.5	0.56	0.16	15.11	-0.06	0.96
XM_028892099.2	3399	Rnf31	15.8	0.56	0.16	16.08	0.11	0.93
XM_028888974.2	3153	LOC114706549	43.76	0.55	0.16	41.15	-0.15	0.9
XM_028864061.2	2198	Hnrnpf	41.39	0.55	0.16	47.54	1.01	0.15
XM_028859550.2	1442	Psmd8	42.56	0.54	0.16	41.96	0.66	0.29
XM_028884536.2	1452	Rab1a	41.82	0.53	0.16	49	1.37	0.01
XM_028860126.2	3225	Vps41	14.68	-0.59	0.16	16.33	-0.52	0.53
XM_028855658.2	1154	Erp29	41.16	-0.61	0.16	51.29	-0.33	0.73
XM_037201844.1	1732	Azgp1	19.08	-0.63	0.16	19.07	-1.47	0.01
XM_028891386.2	3003	Nadk	14.27	-0.66	0.16	19.67	-0.5	0.56
XM_028895120.1	2207	Tsc22d3	201.96	-0.69	0.16	187.51	-0.48	0.66
XM_028892497.2	1944	Hexa	14.01	-0.74	0.16	19.15	-0.44	0.76
XM_028874185.2	1155	Zwint	16.1	-0.76	0.16	17.55	-0.02	0.99
XM_028886284.2	1517	Tspan31	15.25	-0.77	0.16	18.38	-0.61	0.54
XM_028888222.2	607	LOC114706008	21.8	-1.07	0.16	20.4	-1.94	0.13
XM_028880264.2	452	LOC114700598	18.72	1.79	0.17	78.45	-0.47	0.77
XM_028868993.2	1520	Slc35b1	10.81	0.79	0.17	10.28	0.72	0.54
XM_037208757.1	1922	Tkt	16.78	0.77	0.17	13.39	0.72	0.73
XM_037198388.1	1196	LOC114699118	17.59	0.71	0.17	13	-0.27	0.86
XM_028853567.2	2888	Hgs	14.37	0.63	0.17	11.72	0.46	0.69
XM_028877301.2	3702	Atp1a1	93.81	0.62	0.17	78.4	0.49	0.63
XM_028874611.2	2535	Tmbim6	142.32	0.58	0.17	122.88	0.73	0.36
XM_028879397.2	3172	Gnai3	44.05	0.57	0.17	34.36	0.56	0.49
XM_037201294.1	3412	Npepps	18.85	0.57	0.17	18.44	-0.72	0.32
XM_037207091.1	4479	Sec24b	15.68	0.55	0.17	13.34	0.28	0.79
XM_028887014.2	3068	Rbm5	39.77	0.54	0.17	33.04	-0.07	0.95
XM_028871667.2	3252	Aggf1	16.22	0.54	0.17	13.21	0.1	0.94
XM_028872012.2	4646	Nfatc1	12.7	-0.55	0.17	13.44	-1.51	0.00239
XM_028886879.2	5654	Smarcc1	15.82	-0.58	0.17	14.86	-0.04	0.97
XM_028858925.2	2355	Tbc1d17	18.88	-0.62	0.17	22.72	-0.76	0.26
XM_028864237.2	2266	Txk	16.95	-0.64	0.17	16.48	-1.45	0.06
XM_028858800.2	1535	Klhdc2	23.56	-0.65	0.17	26.21	-0.31	0.78
XM_028854309.2	4573	Carmil2	10.79	-0.71	0.17	11.71	-1.63	0.00191
XM_028878598.2	3847	Cdc25b	72.21	-0.72	0.17	72.36	-0.63	0.6
XM_028865016.2	1383	Etfa	16.66	-0.72	0.17	18.74	-0.19	0.89
XM_028855735.2	2222	Zcchc18	13.09	-0.72	0.17	13.82	-0.84	0.29
XM_028889908.2	1796	Cd40lg	12.52	-0.73	0.17	11.97	-1.06	0.2
XR_003734465.2	718	LOC114692826	26.06	-0.74	0.17	27.32	-0.74	0.46
XM_028875451.2	2153	Nipal3	11.48	-0.76	0.17	13.11	-1.12	0.15
XM_028873124.2	3018	Klf4	14.78	-0.79	0.17	23.29	-1.42	0.2
XM_037206150.1	1997	Stx3	20.6	-1.64	0.17	15.91	-3.88	0.00604
XM_028868190.2	876	Gzma	53.61	1.05	0.18	22.07	-0.28	0.89
XM_028865591.2	2613	Cd244	15.15	0.69	0.18	13.97	0.09	0.95
XM_028872770.2	1792	Akirin2	21.07	0.67	0.18	17.89	1.08	0.06
XM_037198536.1	2684	Snx8	13.67	0.67	0.18	13.04	0.73	0.38
XM_037201711.1	1229	LOC114687020	95.66	0.63	0.18	65.34	-0.12	0.93
XM_028866182.2	4398	Ube2h	65.73	0.63	0.18	49.47	0.77	0.35
XM_028869603.2	3901	Gns	55.36	0.63	0.18	52.1	0.46	0.7
XM_028888925.2	1952	LOC114706521	18.13	0.62	0.18	17.96	0.34	0.75
XM_028856245.2	3416	Mcl1	172.14	0.58	0.18	142.39	0.43	0.69
XM_028882335.2	4608	Tbc1d14	18.6	0.56	0.18	16.38	0.07	0.96
XM_028894557.2	6385	Mia3	24.49	0.55	0.18	20.21	0.17	0.89
XM_028888112.2	4621	Slc9a1	11.71	0.55	0.18	11.39	-0.11	0.93
XM_028892467.2	5163	Eml4	17.56	0.54	0.18	17.06	0.62	0.49
XM_028858926.2	2432	Nup62	24.02	0.53	0.18	23.88	0.33	0.74
XM_028889212.2	4299	Wwp2	15.64	0.53	0.18	15.13	0.36	0.68
[truncated: 3,014 more rows]
