# Supplementary material for: The infection-tolerant white-footed deermouse tempers interferon responses to endotoxin in comparison to the mouse and rat
Source: eLife. 2024 Jan 9;12:RP90135. doi: 10.7554/eLife.90135 (PMC10945503; doi:10.7554/eLife.90135)
Supplement: Figure 6—source data 1. [file elife-90135-fig6-data1.xlsx]

## Sheet: Sheet1
Figure 6-Source Data 1. Natural logarithms of ratios of transcripts of selected genes (columns E-DO) to Ptprc transcripts in blood of Mus musculus CD-1 (Mus) or Peromyscus leucopus LL stock in blood of animals with (LPS) or without (control) treatment with lipopolysaccharide by individual animals; columns DQ-DU are ratios of transcripts of four pairs of genes.
animal	species	sex	treatment	Acod1	Akt1	Akt2	Arg1	Bcl3	Camp	Ccl2	Ccl3	Ccl4	Cd14	Cd177	Cd3d	Cd4	Cd69	Cd8	Cfb	Cgas	Csf1	Csf1r	Csf2	Csf3	Csf3r	Cx3cr1	Cxcl1	Cxcl10	Cxcl2	Cxcl3	Dhx58	ERV Env	ERV Gag-pol	Fcer2	Fcgr2a	Fcgr2b	Fcgr3/Cd16	Fgr	Fos	Fpr2	Gapdh	Gbp4	Glrx	Gzmb	Hif1a	Hk3	Hmox1	Ibsp	Icam
MM19	Mus	female	control	-6.83336	-2.66372	-1.82787	-5.66064	-4.74435	-5.37296	-9.38293	-6.69026	-6.30727	-3.65211	-3.77069	-2.59814	-2.80117	-4.34207	-3.4245	-5.52711	-6.39968	-4.92098	-1.58149	-9.38293	-9.38293	-0.411241	-3.65852	-9.38293	-8.70517	-9.38293	-7.00042	-4.79024	0.163746	1.2383	-2.00813	-2.61725	-3.43989	-3.2183	-2.11693	-4.32941	-3.26059	-0.447261	-2.97669	-2.86889	-5.02886	-2.97021	-3.35331	-4.31072	-7.20109	-4.26251
MM21	Mus	female	control	-6.94049	-2.31107	-1.97701	-7.0358	-4.05011	-6.08029	-9.27509	-5.57718	-6.08029	-3.66163	-4.53436	-2.17289	-2.42763	-4.09136	-3.54232	-4.91954	-6.3875	-5.03432	-1.03413	-9.33838	-9.27509	-0.789302	-3.40614	-9.27509	-7.0358	-9.27509	-7.25894	-4.42235	-0.184022	1.24076	-2.27705	-2.7647	-4.00566	-2.40301	-1.81652	-4.34795	-3.72891	-0.297644	-2.31195	-3.25388	-4.06027	-3.03943	-3.4776	-4.07569	-8.64523	-3.81293
MM23	Mus	female	control	-6.99851	-2.12841	-1.7945	-5.95706	-3.61412	-4.96163	-7.69166	-5.61222	-6.22532	-3.51727	-3.41037	-2.21799	-2.55979	-3.82046	-3.3831	-5.45806	-6.38074	-5.45806	-1.66177	-8.79802	-8.79802	-1.12405	-4.0281	-7.40397	-8.79802	-8.09712	-8.79802	-4.42666	1.09213	2.13018	-2.0287	-2.95546	-3.04088	-4.1653	-2.50613	-4.49981	-4.06288	-0.295322	-2.44113	-2.53452	-4.6794	-2.52687	-4.12683	-4.64713	-8.09712	-3.61412
MM25	Mus	female	control	-6.90776	-2.32893	-1.99584	-5.22136	-3.62309	-6.31997	-9.15679	-5.29832	-6.72543	-2.74887	-2.9623	-2.77579	-3.04073	-4.15409	-3.90704	-6.03229	-7.12538	-4.59522	-1.58866	-9.15679	-9.15679	-0.267095	-3.68489	-9.15679	-9.15679	-9.15679	-8.51719	-4.6355	0.0299102	1.18365	-1.54834	-2.69711	-3.21638	-2.61456	-1.99216	-4.42285	-3.20153	-0.483697	-2.67655	-2.70456	-4.10439	-3.07911	-3.3187	-4.28309	-7.6009	-3.74228
MM27	Mus	female	control	-6.44695	-2.23236	-1.7485	-5.87159	-3.30184	-4.71235	-8.78029	-5.27688	-6.56474	-1.75357	-2.45386	-2.33063	-2.57807	-4.75236	-3.58793	-4.21336	-6.55891	-4.46979	-1.71173	-7.95103	-8.78029	0.116275	-4.31344	-8.78029	-6.56474	-6.85242	-7.95103	-4.4257	-0.0760727	1.04544	-2.54835	-2.01746	-3.73152	-3.18886	-1.68004	-3.99022	-2.7226	-0.204514	-2.3846	-2.63291	-4.35372	-3.19314	-2.78625	-3.95283	-7.54557	-3.7389
MM17	Mus	male	control	-4.36663	-2.18919	-1.78158	-3.86058	-2.87319	-4.36663	-9.11247	-4.95442	-5.29089	-1.51583	-3.35071	-2.71523	-3.43459	-4.80846	-4.21931	-4.38263	-6.89305	-3.36518	-1.57732	-9.11247	-7.81662	0.895319	-3.74759	-9.20291	-8.1043	-8.50977	-7.59347	-4.40424	-0.740462	0.464325	-3.83227	-1.48824	-3.31403	-2.24446	-1.17185	-2.82279	-2.05143	-0.420743	-2.10619	-2.33702	-2.90765	-2.56828	-2.17117	-3.29483	-5.37427	-3.66558
MM1	Mus	male	control	-6.50192	-2.30722	-2.10953	-8.98682	-3.98288	-6.50192	-8.29367	-6.15361	-8.29367	-3.13175	-2.97555	-2.61863	-2.86433	-3.92423	-3.5444	-5.32326	-5.89565	-4.87595	-1.1469	-8.80234	-8.80234	-0.396006	-3.14618	-8.80234	-8.29367	-8.80234	-6.42187	-3.95713	-0.176985	1.31577	-2.06813	-2.51448	-3.44556	-3.19076	-1.96842	-3.83933	-3.63496	-0.50422	-2.52692	-2.78025	-5.055	-2.85995	-3.41087	-4.11162	-8.80234	-3.68352
MM3	Mus	male	control	-8.35796	-1.88315	-1.78003	-7.66482	-3.66662	-6.27852	-6.97167	-6.2179	-5.96007	-3.85261	-6.97167	-2.40342	-3.17899	-4.13113	-4.25532	-4.30618	-6.65298	-5.46759	-1.23228	-9.05603	-8.35796	-1.19828	-3.0773	-9.05603	-7.66482	-9.05603	-9.05603	-4.7183	-0.0349661	1.48198	-1.92422	-2.88359	-3.30491	-2.89625	-2.16867	-4.15327	-3.32101	-0.438607	-2.24318	-3.39163	-4.45599	-2.93081	-3.46012	-3.75781	-7.66482	-3.16501
MM5	Mus	male	control	-5.98439	-2.33335	-2.2051	-9.07544	-4.39331	-7.28368	-9.11478	-6.131	-5.81734	-3.10929	-3.28242	-2.57565	-3.03043	-4.23125	-3.80244	-5.01499	-6.6772	-4.5981	-1.47854	-8.38229	-9.11478	-0.275926	-3.44065	-9.11478	-7.28368	-9.11478	-8.38229	-4.36556	-0.262077	0.836066	-2.22003	-2.61553	-3.21465	-3.29778	-2.15575	-3.88248	-3.44422	-0.670293	-2.48789	-3.05441	-3.78213	-3.0328	-3.74272	-4.47027	-7.68914	-3.67276
MM7	Mus	male	control	-7.95332	-2.84375	-2.59387	-8.64647	-4.35601	-5.81325	-9.42556	-5.93842	-5.70203	-4.17483	-3.1763	-2.61218	-2.98351	-4.3424	-3.70126	-5.53295	-5.72852	-5.27917	-1.5415	-7.54785	-9.42556	-0.573218	-3.28988	-9.42556	-7.95332	-9.42556	-9.42556	-4.64809	-0.718095	0.7269	-2.18891	-2.85651	-3.49029	-3.63917	-2.23219	-4.68565	-3.57756	-0.600397	-2.36326	-3.48454	-3.77893	-3.09351	-3.44797	-4.43434	-7.14239	-3.90153
MM31	Mus	female	LPS	-1.25628	-2.86778	-0.993603	-2.95386	-1.64948	-1.51824	-4.44676	-0.984154	-0.956332	-0.491678	-2.50802	-3.13843	-3.49125	-1.25218	-4.307	-3.02365	-3.84005	-3.39944	-3.4722	-4.39797	-5.36305	-1.76232	-4.14666	-3.77893	-1.31344	-1.9577	-3.85897	-1.75714	1.06301	2.74285	-5.49658	-2.10016	-2.45889	-3.09869	-2.11462	-3.75361	-1.70592	0.217622	-0.282424	-2.01315	0.924343	-1.87034	-2.96516	-3.85897	-4.26444	-1.20417
MM33	Mus	female	LPS	-0.753179	-2.71212	-1.28093	-4.5245	-1.16369	-1.6	-3.8631	-1.22405	-0.946205	0.34207	-2.51797	-2.43728	-3.10744	-0.862544	-3.83136	-0.384348	-3.95536	-3.71357	-2.56089	-6.60394	-3.42589	-1.66588	-5.9108	-1.77164	-0.210353	-1.46228	-3.25404	-1.20992	1.23941	2.43667	-3.89589	-1.41656	-1.66588	-2.1851	-1.97408	-3.5129	-1.59331	0.277981	0.107188	-2.16129	0.48363	-1.3622	-2.51797	-3.00663	-5.09987	-1.09861
MM35	Mus	female	LPS	-0.944221	-2.61627	-0.757573	-2.37786	-1.02861	0.0856051	-4.01807	-1.33748	-1.03018	-0.0113059	-0.217678	-2.50707	-3.61261	-1.71549	-3.57178	-2.1905	-3.51125	-3.92846	-3.08936	-4.39276	-7.48381	-0.388742	-5.40437	-5.69205	-0.77085	-2.55655	-4.04982	-1.11693	1.32364	2.67522	-4.43928	-1.2377	-1.54101	-1.93085	-1.08355	-5.18122	-0.45738	0.619688	-0.0716464	-1.12078	0.564342	-1.5676	-2.30202	-2.96202	-2.74761	-1.04127
MM37	Mus	female	LPS	-1.6047	-2.94478	-1.22547	-5.68562	-1.44142	-1.59127	-4.09638	-1.57147	-1.499	-1.26197	-1.827	-3.35347	-4.20401	-1.80819	-3.94515	-2.45087	-3.93971	-3.61876	-3.1054	-5.90876	-4.89716	-1.50969	-6.60191	-4.03696	-1.08446	-2.97092	-4.76933	-1.49507	1.28201	2.8428	-4.15956	-1.92442	-2.23563	-2.675	-1.92675	-5.42325	-1.59127	0.0723364	-0.0508289	-2.32872	0.445391	-1.79176	-3.67072	-3.68414	-6.60191	-1.12336
MM39	Mus	female	LPS	-0.394786	-2.10639	-0.378232	-2.28034	-1.29826	-1.6815	-2.19416	-1.08945	-0.876696	-0.388735	-2.29039	-3.66663	-4.58292	-1.29452	-4.68829	-0.296583	-4.35778	-3.24792	-2.01031	-4.48761	-2.69585	-1.21908	-4.80607	-2.63701	-0.061136	-2.13192	-3.07885	-0.819236	2.54294	3.65541	-4.24645	-1.63849	-2.15812	-1.15217	-1.28339	-4.11292	-1.07737	0.832731	0.343604	-1.1784	0.522415	-0.969308	-2.91522	-2.15812	-3.88978	-0.857231
MM11	Mus	male	LPS	-1.51637	-2.21636	-2.80418	-6.61778	-1.9651	-3.66708	-6.53202	-2.57368	-3.45287	-1.86214	-3.86975	-4.10225	-3.25513	-2.33739	-4.01233	-3.52674	-4.23189	-4.43223	-4.18916	-7.1336	-4.21718	-1.73645	-7.29611	-5.76623	-4.42888	-2.03205	-4.85377	-3.32777	0.477227	2.13042	-2.93941	-3.78457	-2.5576	-5.2057	-2.39062	-3.47003	-2.67548	-2.5352	-1.06263	-4.6655	-1.78971	-2.5943	-2.5967	-6.00219	-7.56438	-1.494
MM13	Mus	male	LPS	-0.186181	-2.54121	-1.61835	-2.34029	-2.01674	-0.324341	-7.33975	-2.2501	-2.64841	0.778055	-0.467281	-2.41009	-2.88154	-1.80636	-3.58634	-4.67717	-4.59116	-5.21949	-2.90894	-6.64661	-3.65924	-0.653893	-5.87342	-4.46807	-4.58822	-0.793926	-3.18087	-4.35936	0.665414	2.18636	-3.96103	-2.05486	-2.92898	-3.44793	-2.19809	-2.4271	-1.59568	0.0304765	-1.59249	-1.9769	-1.17224	-1.75501	-1.87592	-4.91201	-3.82325	-1.43077
MM15	Mus	male	LPS	-0.673015	-3.36303	-1.63799	-2.85647	-1.92896	-0.209023	-3.57034	-0.869299	-0.958197	-0.00620845	-1.25269	-3.26966	-4.09523	-1.93609	-4.55994	-2.03703	-3.81976	-4.18789	-3.43812	-5.2117	-5.03843	-1.33881	-5.60374	-4.16866	-0.49079	-1.97461	-3.61313	-1.82295	0.459418	2.07606	-4.72827	-1.47274	-2.09878	-2.38487	-1.79264	-3.93982	-1.08981	-0.232359	-0.493924	-1.91286	0.874031	-1.58197	-2.66776	-3.40652	-3.77276	-1.49287
MM29	Mus	male	LPS	-1.25632	-2.88734	-1.25988	-3.56247	-1.45225	-0.938833	-4.36894	-1.46313	-1.66089	-0.915784	-2.07036	-3.02347	-3.47694	-1.66624	-3.82662	-2.53796	-4.13889	-4.59208	-3.41343	-5.10291	-6.89467	-1.00303	-5.39059	-3.9769	-0.915784	-3.27033	-5.10291	-1.49036	1.13697	2.42447	-3.35371	-2.03099	-2.9727	-2.37833	-1.77668	-5.28523	-1.44793	0.426849	0.28958	-2.03099	-0.0621772	-1.90424	-3.19337	-2.80033	-7.58782	-0.844937
MM9	Mus	male	LPS	-0.883425	-2.61279	-0.959185	-6.73993	-1.71605	-1.11051	-3.24342	-1.46693	-1.22852	-0.228183	-1.44411	-2.73259	-3.21357	-1.26556	-4.2142	-0.840031	-4.17439	-4.13724	-2.32109	-5.48717	-4.79402	-0.71165	-5.64132	-2.6709	-0.794508	-2.16008	-3.56187	-1.16528	2.041	2.95482	-4.34203	-1.37395	-1.39759	-2.11496	-1.71276	-3.48183	-0.775064	0.430191	0.516016	-1.66788	-0.176778	-1.15455	-2.84811	-3.02636	-5.82364	-1.41448
24841	Peromyscus	female	control	-6.67129	-2.17322	-2.83416	-2.68158	-4.27161	-5.62638	-9.5045	-8.6572	-3.4353	-2.06514	-6.56006	-2.34963	-2.06514	-3.45163	-2.6207	-4.90267	-5.18632	-6.12578	-1.26087	-10.5269	-10.5269	-1.77053	-3.7435	-10.6031	-9.5045	-8.81135	-8.81135	-3.89068	-2.84578	-1.55983	-2.75809	-3.1346	-3.98839	-3.06782	-1.91483	-4.92294	-4.69775	-0.676447	-2.52071	-4.68422	-3.30399	-2.54637	-2.90191	-4.39452	-10.5269	-4.56286
24842	Peromyscus	female	control	-5.25559	-1.86477	-2.9012	-1.52608	-4.09791	-4.34567	-10.1214	-6.72458	-2.10197	-2.27869	-5.14311	-2.48598	-2.27869	-3.07168	-2.64296	-5.39139	-4.9091	-6.10289	-1.10118	-9.39873	-10.1214	-0.625884	-4.65379	-10.1214	-7.89465	-8.01243	-8.01243	-3.72098	-2.747	-1.18917	-2.73368	-2.62794	-3.5168	-3.14106	-1.36783	-3.66054	-4.98593	-0.26128	-2.48102	-4.4751	-2.07095	-2.49197	-2.25629	-3.80774	-8.70558	-4.08799
24843	Peromyscus	female	control	-6.13813	-1.96033	-2.87152	-1.35218	-4.061	-3.63943	-8.74082	-8.33535	-2.18368	-2.51132	-4.62994	-2.74499	-2.51132	-3.2416	-3.30819	-3.24365	-5.52018	-5.27508	-1.11571	-10.2027	-10.2027	-0.821642	-3.59769	-9.43396	-8.1812	-9.43396	-9.43396	-4.62409	-3.32223	-1.34898	-3.34379	-2.67936	-3.47296	-2.92818	-1.52889	-2.9387	-4.52869	-0.477742	-2.60039	-4.30111	-5.00912	-2.467	-2.56651	-3.79561	-8.33535	-4.24938
24845	Peromyscus	female	control	-5.57303	-2.06751	-2.87755	-0.775113	-4.30062	-6.75865	-10.3025	-10.3025	-1.89602	-2.22117	-6.2121	-2.02765	-2.22117	-2.88084	-2.83353	-7.14164	-5.27443	-6.63082	-1.63767	-10.3025	-10.3025	-0.626978	-3.69271	-10.3025	-7.32396	-10.3025	-9.84969	-4.69296	-3.04514	-1.43572	-2.42047	-2.81928	-3.96916	-3.40318	-1.51702	-3.87843	-5.24452	-0.527005	-2.74514	-4.32225	-4.24022	-2.74432	-2.58917	-4.34843	-8.59693	-4.98988
24853	Peromyscus	female	control	-5.57518	-2.03793	-2.80659	-1.91929	-4.13203	-6.48089	-8.17257	-7.41043	-2.62238	-2.72398	-6.24728	-2.88574	-2.72398	-3.20574	-2.52813	-5.53351	-4.7362	-5.92882	-1.38183	-8.73218	-10.1164	-0.952717	-3.65545	-10.1164	-6.86038	-10.1164	-10.1164	-3.62234	-3.12646	-1.40397	-3.0029	-2.43646	-3.57601	-3.42144	-1.63816	-4.0317	-4.96519	-0.419619	-2.37088	-4.35016	-2.56205	-2.3813	-2.65397	-4.12452	-10.1164	-4.38514
24852	Peromyscus	male	control	-6.05528	-1.78169	-2.73046	-1.54182	-3.93563	-5.35453	-7.93475	-8.53258	-2.33855	-2.31073	-5.2267	-2.69724	-2.31073	-3.36365	-2.86427	-5.03058	-4.84585	-5.40105	-0.951142	-10.5514	-10.5514	-0.883757	-4.05628	-10.5514	-7.26692	-10.5514	-10.5514	-3.03865	-2.87441	-1.31713	-3.09332	-2.36069	-3.73005	-3.24707	-1.29324	-3.6763	-4.78201	-0.513988	-1.96451	-4.25718	-3.11446	-2.45036	-2.15493	-4.17122	-8.62789	-4.07296
24861	Peromyscus	male	control	-6.40698	-1.85846	-2.80213	-1.47218	-3.77649	-5.45262	-6.39216	-8.30909	-2.28831	-2.22847	-5.86674	-2.26669	-2.22847	-3.31255	-2.68905	-3.74474	-5.17352	-5.65584	-1.06822	-9.22538	-10.3654	-0.950383	-3.53417	-8.81991	-7.97261	-8.41445	-9.51306	-3.82714	-2.99254	-1.85417	-2.78883	-2.68146	-3.68313	-3.10453	-1.30884	-4.38316	-4.99127	-0.469757	-2.61099	-4.19821	-3.71599	-2.58094	-2.70365	-4.18034	-10.3654	-4.52263
24863	Peromyscus	male	control	-6.31316	-1.76362	-2.87098	-0.493656	-3.77418	-2.43018	-10.3748	-7.9424	-1.42665	-2.85851	-2.79026	-2.98306	-2.85851	-3.51516	-3.63833	-3.42279	-5.34714	-5.62001	-0.42466	-10.3748	-10.3748	-0.820499	-2.66889	-10.3748	-7.02611	-10.3748	-10.3748	-3.66573	-3.26129	-2.02633	-2.9979	-2.52186	-3.6755	-2.31011	-0.866673	-3.57042	-3.65881	0.00485653	-2.68751	-4.2661	-4.38705	-2.29237	-1.86338	-3.63026	-5.06883	-4.16505
24869	Peromyscus	male	control	-6.78208	-1.97274	-2.82222	-1.93789	-4.21713	-6.59976	-7.69837	-9.08466	-2.34592	-2.42217	-6.25145	-2.65172	-2.42217	-3.31478	-3.35619	-6.19429	-5.80678	-4.93362	-1.25802	-10.2831	-10.2831	-1.17078	-3.36764	-9.77781	-10.2831	-9.77781	-10.2831	-4.51958	-3.00975	-1.26146	-2.91296	-2.65333	-3.64441	-3.84027	-1.49053	-4.00949	-5.19284	-0.493477	-2.69442	-4.69021	-4.35286	-2.52647	-2.98211	-4.05423	-7.98605	-4.50995
24876	Peromyscus	male	control	-4.61028	-1.62857	-2.72206	0.267712	-3.09363	-5.48322	-6.30558	-7.37029	-0.823365	-2.62885	-5.57853	-2.53958	-2.62885	-3.01102	-2.97215	-3.77025	-5.17282	-5.39621	-1.20068	-10.1479	-8.97973	0.0197644	-3.47847	-6.78251	-10.1479	-5.82273	-6.17637	-3.44215	-3.12543	-1.18243	-2.827	-1.98488	-3.66407	-2.62102	-0.877751	-3.97244	-4.35476	-0.216147	-2.40117	-4.33534	-2.70027	-2.33855	-1.92226	-3.99271	-8.28658	-4.22184
24846	Peromyscus	female	LPS	-1.93104	-2.32626	-2.40757	0.445905	-2.23036	-0.399272	-5.46175	-3.30441	-0.57154	-1.81616	-1.97852	-1.88961	-1.81616	-2.82203	-1.74502	-1.28182	-4.12243	-4.77791	-3.41765	-7.43583	-3.71255	0.437132	-5.82639	-3.90361	-4.21696	-2.75123	-3.04221	-2.78909	-3.36015	-0.0179021	-4.67582	-0.618001	-1.11207	-1.02511	-0.164962	-6.08344	-0.907289	-0.103593	-1.87361	-2.68109	-1.38736	-1.44387	-0.819766	-2.37281	-1.3562	-2.4504
24847	Peromyscus	female	LPS	-1.82118	-2.56555	-2.70921	0.667283	-2.09615	-0.824357	-6.55599	-4.02397	-1.01483	-3.54589	-1.75933	-4.01564	-3.54589	-3.8067	-3.88003	-2.28006	-4.53032	-4.33279	-3.83574	-10.3456	-4.51	0.609358	-6.5047	-6.58266	-6.11604	-4.17986	-4.28278	-3.38534	-4.01235	0.0777883	-4.83699	-0.361265	-0.782423	-1.18854	0.140814	-6.55599	-1.0982	-0.228338	-2.31884	-2.40703	-3.02115	-1.57149	-0.43952	-2.92605	-0.395563	-2.48382
24848	Peromyscus	female	LPS	-1.22995	-2.12483	-2.71098	0.950773	-2.20217	-1.5519	-3.31015	-3.66465	-0.454253	-3.70122	-2.43723	-3.58118	-3.70122	-4.41489	-3.36024	-2.40987	-4.84589	-4.59629	-2.15828	-8.8785	-5.95534	0.550062	-5.04552	-6.18387	-5.62812	-4.06957	-4.27133	-2.97463	-3.64787	-0.910008	-4.24961	-0.393497	-1.26646	-0.992115	-0.00265123	-6.68127	-1.08822	-0.0448889	-2.27185	-2.71098	-1.83691	-1.41078	-0.403043	-3.69447	-0.863038	-2.68246
24850	Peromyscus	female	LPS	-1.12794	-2.48251	-2.69332	1.16194	-2.40065	-1.41061	-5.16722	-3.329	-0.209103	-3.57049	-1.75497	-4.03305	-3.57049	-4.99378	-3.69856	-1.48499	-4.62351	-5.75501	-1.88277	-10.8097	-5.82076	0.967364	-4.75004	-6.03665	-5.77336	-4.07791	-4.29639	-2.27661	-3.76544	-0.669282	-4.81536	-0.61268	-1.25661	-0.737608	-0.0174981	-6.44816	-0.989344	-0.212658	-2.05697	-2.48216	-1.89447	-1.48544	-0.296448	-3.01681	-0.508128	-2.87275
24851	Peromyscus	female	LPS	-1.44992	-2.54437	-2.62477	0.924229	-1.76706	0.0915425	-6.04291	-2.72066	-0.71855	-4.83558	-1.61611	-5.02294	-4.83558	-3.90433	-4.2414	-1.59111	-4.54529	-4.3795	-3.01453	-6.99339	-4.02633	0.618599	-5.7916	-5.44214	-4.46419	-3.70564	-3.9073	-2.81724	-3.42998	-0.451289	-5.93169	-0.112698	-0.693766	-0.768621	0.342225	-6.85174	-0.390099	-0.0617952	-1.99589	-2.43678	-2.18103	-1.26903	-0.103405	-2.28877	-0.454343	-2.46009
24855	Peromyscus	male	LPS	-1.01259	-2.1346	-2.41362	0.843076	-1.39404	-0.27468	-3.59611	-2.43884	-0.253693	-3.39317	-1.90971	-2.98431	-3.39317	-2.8512	-2.68987	-1.16031	-4.04631	-3.56534	-3.14983	-5.2373	-3.37297	0.338161	-5.11594	-3.38302	-3.15786	-2.44475	-2.85418	-2.31171	-2.95984	0.00293425	-4.17148	0.0115904	-1.10549	-0.840067	0.142598	-5.41319	-0.314028	0.898056	-1.85784	-2.30139	-0.973711	-1.69121	-0.0871828	-2.65269	-0.335615	-1.79399
24860	Peromyscus	male	LPS	-0.999813	-2.37779	-2.56978	0.812568	-1.19503	0.300805	-5.17055	-3.23528	-0.471347	-5.25152	-0.948537	-5.8345	-5.25152	-4.19669	-5.17426	-1.29442	-4.44282	-4.1174	-2.08745	-8.28406	-3.33767	0.964481	-6.59458	-5.32223	-4.65529	-3.70935	-3.90831	-2.89728	-3.11843	-0.554893	-6.12458	-0.346509	-1.24967	-0.881916	0.498593	-5.62731	-0.55451	0.38356	-2.63128	-2.65255	-3.58131	-1.38107	-0.0651181	-2.13399	0.561763	-2.89233
24865	Peromyscus	male	LPS	-0.373149	-1.33911	-1.71651	1.3754	-1.22343	-0.938468	-3.52703	-1.79824	0.884759	-4.80796	-2.22775	-4.5668	-4.80796	-2.92089	-4.69626	-0.48769	-4.19524	-3.60036	-1.15707	-7.56253	-1.35337	-0.275656	-6.4174	-0.55119	-2.49723	0.816711	0.626791	-2.33602	-3.20099	-0.446539	-4.73776	0.57139	-0.659934	-0.188531	0.34138	-5.06579	-0.0531975	0.975835	-1.48522	-1.75396	-2.64778	0.21532	-0.880782	-1.51179	-0.852532	-0.438745
24873	Peromyscus	male	LPS	-1.91872	-2.13209	-2.43979	0.157168	-1.77839	-0.353475	-6.65929	-3.00216	-1.0068	-3.36346	-2.12939	-3.24157	-3.36346	-2.04914	-3.30066	-2.55665	-3.5238	-4.17439	-3.17805	-6.25383	-3.88671	0.278505	-6.94698	-5.743	-3.8409	-3.85593	-4.03826	-2.4108	-2.79559	0.0439882	-2.77259	-0.778761	-1.10343	-1.30625	-0.106429	-6.25383	-1.03528	1.10543	-1.21471	-2.82523	-1.42819	-1.60784	-0.754614	-3.10395	-1.52203	-2.59027
24879	Peromyscus	male	LPS	-1.00439	-1.77563	-2.06926	0.366467	-1.62189	-1.09723	-3.54792	-1.56095	0.808098	-4.86761	-2.61686	-4.83217	-4.86761	-2.73914	-5.69282	-0.360613	-4.03515	-4.87278	-1.58833	-8.34371	-1.10869	-0.804419	-7.13974	-0.848356	-0.89189	-0.119683	-0.562156	-1.96699	-3.8027	-0.760987	-4.86761	-0.0254581	-1.21522	-1.00018	0.055035	-5.3733	0.168435	-0.123175	-1.0734	-2.01191	-3.78984	-0.425994	-1.23193	-1.78978	-1.8063	-0.469671
[truncated: 74 more columns]
