# Supplementary material for: The infection-tolerant white-footed deermouse tempers interferon responses to endotoxin in comparison to the mouse and rat
Source: eLife. 2024 Jan 9;12:RP90135. doi: 10.7554/eLife.90135 (PMC10945503; doi:10.7554/eLife.90135)
Supplement: Figure 9—source data 1. [file elife-90135-fig9-data1.xlsx]

## Sheet: Sheet1
Figure 9-Source Data 1. Targeted RNA-seq of blood of M. musculus and P. leucopus reported in reference 3. Natural log of unique reads normalized for Ptprc (Cd45) reads.
anima	genus	sex	treatment	Acod1	Akt1	Akt2	Akt3	Arg1	Bcl3	Camp	Ccl3	Ccl4	Cd14	Cd177	Cd3d	Cd4	Cd68	Cd69	Cd8	Cfb	Csf1	Csf1r	Csf3	Csf3r	Cx3cr1	Ddx58	Fcer2	Fcgr2a	Fcgr2b	Fcgr3	Fgr	Fos	Fpr2	Gapdh	Gbp4	Glrx	Gzmb	Hif1a	Hk3	Hmox1	Ibsp	Icam1	Ifit1	Ifng	Igtp	Il10	Il12	Il18	Il1b
102	Mus	female	controLPS	-6.47235	-2.58393	-2.4119	-3.7982	-6.47235	-4.70876	-6.47235	-5.62505	-6.3182	-4.7676	-4.65319	-2.56032	-2.54052	-4.20366	-4.50291	-3.39657	-5.7792	-5.62505	-2.59422	-8.26411	-1.00429	-4.35208	-3.00661	-2.13071	-3.20786	-3.32246	-4.31286	-2.73468	-5.08605	-3.83329	-0.918096	-1.82316	-3.59128	-3.78677	-2.93623	-3.56363	-5.43089	-6.3182	-3.98744	-3.30828	-8.26411	-1.88398	-8.26411	-5.21958	-6.47235	-2.54379
120	Mus	female	controLPS	-6.53506	-2.54608	-2.50303	-4.00933	-6.04955	-4.33784	-7.00506	-6.12959	-6.41728	-5.31866	-4.87683	-2.58142	-2.55072	-4.0819	-4.76435	-3.33639	-6.41728	-6.12959	-2.61061	-8.6145	-0.787659	-5.2823	-2.8683	-1.92242	-3.47284	-3.1984	-4.42485	-2.76518	-5.78129	-4.28377	-0.940813	-2.19451	-3.35181	-4.2707	-3.06154	-3.34664	-5.3564	-6.12959	-4.00933	-4.06062	-7.92135	-2.31005	-8.6145	-5.78129	-5.90645	-2.44072
F1_01	Mus	female	controLPS	-6.0424	-2.53985	-2.35102	-3.41773	-4.28454	-4.56079	-5.1261	-5.63693	-5.45461	-4.60731	-4.76146	-2.39695	-2.32882	-4.53832	-4.53832	-2.9697	-6.0424	-5.94709	-2.72821	-7.65183	-1.79247	-5.04914	-2.43418	-1.64179	-3.43233	-3.24511	-4.15533	-2.55197	-6.95869	-4.05452	-0.765302	-1.83175	-3.5328	-3.46218	-2.86018	-3.77027	-5.78003	-5.20949	-3.54919	-3.43971	-8.34498	-1.95306	-8.34498	-4.58378	-6.95869	-3.05168
F3_02	Mus	female	controLPS	-8.53169	-2.61549	-2.4158	-3.96734	-5.7591	-4.18788	-4.61966	-6.04678	-6.2291	-5.82364	-4.28319	-2.37895	-2.27978	-3.98839	-3.85886	-3.11115	-7.14539	-5.23585	-2.8969	-8.53169	-0.88629	-5.03518	-2.9407	-1.99355	-3.45651	-3.3669	-4.20095	-2.80159	-6.2291	-4.10087	-0.877718	-2.05011	-4.07734	-4.0099	-3.15179	-3.47544	-5.19948	-5.7591	-4.06578	-4.28319	-7.83854	-1.95661	-8.53169	-5.27359	-7.14539	-2.33321
115	Mus	male	controLPS	-5.56643	-2.21653	-2.29402	-3.34181	-8.33902	-3.89637	-3.98231	-5.63097	-5.77407	-4.60135	-3.13502	-2.40149	-2.98716	-3.76431	-4.27858	-3.62052	-5.34329	-4.62545	-1.6176	-8.33902	0.207729	-4.27858	-3.16287	-2.38838	-2.03092	-3.17424	-3.04572	-1.77095	-4.90504	-2.50421	-0.5442	-2.0291	-3.26385	-3.80642	-3.03572	-2.53993	-3.92018	-5.63097	-3.67558	-3.535	-8.33902	-1.57861	-8.33902	-5.00682	-5.56643	-1.17199
116	Mus	male	controLPS	-7.28125	-2.4261	-2.28134	-3.3813	-8.89069	-4.23673	-7.50439	-5.71263	-6.40578	-5.2531	-4.0465	-2.68815	-2.98805	-3.91395	-4.20855	-3.628	-7.09893	-5.06204	-2.52078	-8.89069	-0.259807	-4.83024	-3.11924	-1.79148	-2.74008	-3.13178	-4.03866	-2.36712	-5.2531	-3.39352	-0.722483	-2.18016	-3.41005	-3.76079	-3.09463	-3.01576	-5.06204	-5.84616	-4.41335	-3.94904	-8.89069	-2.07067	-8.89069	-4.62801	-7.50439	-1.85983
M4_04	Mus	male	controLPS	-4.17796	-1.97922	-2.19555	-3.38083	-6.52251	-3.63214	-3.57807	-5.69583	-6.07053	-4.16436	-2.41633	-2.88117	-3.22668	-3.00036	-5.10113	-4.51718	-4.91307	-4.49813	-1.53111	-8.46842	0.613516	-4.37408	-2.88493	-2.87744	-1.92595	-2.802	-3.14055	-1.5687	-4.39089	-2.25582	-0.397829	-2.33502	-2.94696	-3.89371	-3.06575	-2.00228	-3.51966	-5.69583	-3.90407	-3.68093	-6.38898	-1.75547	-8.46842	-4.94206	-5.76037	-0.915136
101	Mus	female	LPS	-1.78398	-2.77956	-1.85352	-3.24259	-5.54518	-2.1366	-1.54392	-2.96328	-2.31306	-1.4564	-0.906143	-2.93022	-4.05352	-3.89225	-2.80793	-3.29975	-1.69267	-4.85203	-2.58911	-7.04925	-0.832649	-4.96981	-1.13575	-4.74667	-1.82082	-1.53987	-2.29136	-1.55004	-4.37511	-0.794465	-0.25972	0.0573513	-1.94331	-0.263667	-1.85908	-2.70545	-2.89821	-6.35611	-1.85076	-0.690546	-2.98881	-0.260846	-5.66296	-5.03435	-6.13296	-0.779212
103	Mus	female	LPS	-1.32741	-2.81549	-1.88629	-3.42162	-6.46614	-2.006	-1.94981	-2.26894	-1.91227	-0.598261	-1.71255	-3.22747	-4.16356	-3.52171	-2.6375	-4.67439	-0.977207	-4.0238	-2.80258	-3.30914	-1.17033	-6.46614	-1.07707	-4.67439	-1.86097	-1.44886	-2.85523	-1.80271	-4.16356	-0.92881	-0.225869	0.104738	-2.52456	-0.220038	-1.51032	-3.42162	-3.22747	-5.36753	-1.63384	-0.619706	-2.9546	-0.0928249	-5.54985	-4.7614	-4.96207	-0.567618
104	Mus	female	LPS	-1.63014	-3.21589	-2.19467	-3.55449	-5.67975	-2.53883	-2.49133	-3.0318	-2.6059	-1.4083	-2.24173	-2.77558	-2.93891	-5.05114	-2.50691	-3.64831	-3.02299	-5.81328	-3.68165	-6.37289	-1.76025	-7.06604	-1.15796	-5.56196	-2.9885	-2.35202	-3.88799	-2.34754	-6.37289	-1.45657	-0.549108	0.135503	-2.9717	-0.294105	-2.01618	-3.40248	-5.4566	-5.12013	-2.26202	-0.814136	-4.54031	-0.283281	-7.75919	-5.4566	-5.12013	-1.28068
105	Mus	female	LPS	-1.285	-3.07301	-1.94487	-2.91725	-6.17535	-2.20035	-1.57018	-2.48024	-2.1323	-1.13031	-1.52856	-3.41851	-3.64962	-3.4841	-2.44365	-4.00629	-1.51664	-4.4706	-3.02904	-4.72843	-1.00486	-4.99669	-0.864607	-4.51712	-1.98191	-1.72976	-2.5312	-1.61884	-4.56591	-0.904915	-0.245094	0.356623	-2.28864	-0.177031	-1.88147	-3.16719	-3.27118	-4.92258	-2.00481	-0.352301	-3.733	-0.103456	-6.46303	-4.72843	-4.56591	-0.474068
118	Mus	female	LPS	-1.21845	-2.74843	-1.8893	-3.2409	-5.92648	-2.32008	-2.17698	-2.76948	-2.8204	-1.11565	-1.74698	-3.16436	-3.54385	-3.91158	-2.85071	-4.67372	-2.09784	-4.58275	-3.0548	-5.52102	-0.980088	-5.52102	-1.08098	-4.28425	-2.11982	-1.95619	-2.90606	-1.72179	-4.7738	-0.899317	-0.485508	-0.0733216	-2.24597	-0.752217	-1.92218	-3.38751	-3.71091	-7.02509	-2.09062	-0.781898	-4.88503	-0.505209	-5.77233	-4.72251	-5.92648	-0.669855
F3_3	Mus	female	LPS	-1.90458	-2.7639	-1.72335	-2.93095	-3.76023	-2.02196	-2.43293	-2.58801	-2.07075	-1.19528	-2.13837	-3.32737	-3.84724	-3.78128	-2.44965	-4.49594	-2.06691	-4.6357	-3.1428	-5.14653	-1.45973	-6.24514	-1.01671	-4.33559	-2.35332	-1.84453	-2.91293	-2.13426	-5.68552	-1.40292	-0.416927	0.176485	-2.44405	-0.390065	-2.01466	-3.32737	-4.33559	-3.91786	-2.27014	-0.562408	-4.23023	-0.165204	-5.23354	-4.54039	-5.32885	-0.975991
107	Mus	male	LPS	-1.12055	-2.64092	-1.68207	-2.8215	-3.49403	-1.89691	-0.951305	-2.68537	-3.0164	-0.185426	-0.318531	-2.9914	-3.88934	-3.74826	-2.96701	-4.61326	-1.88459	-5.59409	-2.31695	-7.38585	-0.119024	-7.38585	-1.07593	-4.39012	-1.50532	-1.75106	-2.59836	-1.2568	-4.8209	-0.128848	0.133841	-0.230455	-1.97421	-1.35517	-1.82133	-2.21537	-2.84256	-4.09001	-2.01988	-0.830494	-4.90094	-0.244606	-7.38585	-4.6778	-7.38585	-0.336596
108	Mus	male	LPS	-1.09809	-2.48595	-1.57851	-2.83636	-6.45625	-2.11244	-1.53627	-2.01359	-2.03741	-0.899418	-1.36045	-3.27819	-4.29676	-4.78227	-2.37871	-4.33598	-2.35636	-5.60895	-3.77067	-5.35763	-0.946858	-7.55486	-0.821457	-4.72165	-1.88154	-2.02147	-2.53098	-1.93084	-4.84681	-0.960445	-0.0943682	0.188411	-2.38437	-0.598313	-2.19827	-3.03307	-3.47732	-5.94542	-1.40213	-0.101297	-2.95974	0.0390193	-5.15696	-4.66449	-5.25227	-0.254386
109	Mus	male	LPS	-1.26606	-2.85049	-1.57851	-2.62982	-4.76003	-2.39291	-1.10506	-2.52644	-2.31769	-1.13792	-1.11372	-3.2937	-3.98685	-3.91274	-2.73408	-4.47235	-2.72315	-4.35457	-4.1539	-5.85865	-0.797636	-5.45318	-0.861435	-5.04772	-1.91222	-2.17604	-2.61997	-1.8333	-4.47235	-0.839713	-0.0311732	0.322921	-1.82884	-0.681086	-2.31047	-2.90114	-3.33292	-5.45318	-1.92682	-0.155698	-3.87765	0.0991313	-6.14633	-4.3005	-5.45318	-0.521109
M2_05	Mus	male	LPS	-0.796052	-2.69634	-2.11504	-3.49544	-7.93809	-2.13597	-0.944156	-2.12695	-3.11781	-0.529558	-0.632901	-3.56864	-4.22452	-4.13143	-3.06289	-4.67999	-1.66145	-5.10488	-2.51314	-7.24494	-0.2593	-7.24494	-0.992075	-4.41173	-1.65023	-1.98225	-2.44503	-1.36861	-4.94236	-0.450915	-0.0053677	-0.242786	-1.94413	-1.63181	-2.43276	-2.40075	-2.54902	-5.6355	-1.54283	-0.462749	-4.3005	-0.243696	-5.74086	-5.04772	-4.99365	0.0619254
M4_06	Mus	male	LPS	-0.936393	-2.47083	-1.91954	-3.54396	-4.94931	-2.37259	-1.51284	-2.53752	-3.11981	-0.331903	-0.423345	-2.94991	-4.04852	-3.98789	-3.21019	-5.31703	-2.61641	-4.74167	-2.55141	-7.51425	-0.0752831	-6.82111	-1.08777	-4.29538	-1.61162	-1.78415	-3.01444	-1.28574	-4.8752	-0.211085	0.0231754	-0.533249	-1.72736	-1.69121	-1.9968	-1.97692	-2.94991	-5.7225	-2.01709	-0.730929	-6.82111	-0.430028	-7.51425	-5.43481	-5.43481	0.0715342
M4_07	Mus	male	LPS	-0.571362	-2.54394	-1.7563	-3.11034	-6.56032	-2.14752	-1.41283	-1.48515	-2.4913	-0.266904	-0.90959	-3.1426	-3.72711	-3.99537	-2.84675	-3.69812	-2.25626	-3.75696	-2.68912	-4.48088	-0.466753	-6.56032	-1.03686	-3.72711	-2.04398	-2.29764	-2.53497	-1.47582	-4.61441	-0.420439	-0.011388	-0.334775	-1.91114	-1.47582	-2.44945	-2.40144	-3.42483	-5.30756	-1.42159	-0.380307	-7.25347	-0.320047	-7.25347	-6	-4.76856	0.478022
22275	Peromyscus	female	controLPS	-7.14362	-2.32819	-2.58554	-3.64107	-1.70293	-3.64711	-5.08949	-8.75306	-8.05991	-2.64826	-8.05991	-2.16138	-1.7628	-3.87786	-2.51083	-3.13628	-8.05991	-6.67361	-2.66628	-8.75306	-0.927411	-4.74572	-3.88552	-2.45411	-3.66546	-3.1809	-4.2422	-2.009	-3.75584	-5.61756	-0.0950574	-2.0912	-4.44899	-4.17834	-2.74179	-2.991	-4.94639	-7.36676	-5.19771	-1.18055	-7.36676	-2.90085	-8.05991	-8.75306	-6.18811	-1.45732
22277	Peromyscus	female	controLPS	-8.1952	-2.16993	-2.75062	-3.69261	-2.94161	-4.30338	-8.1952	-9.58149	-6.8089	-3.43516	-7.78973	-2.03135	-1.68829	-3.61278	-2.92091	-3.1879	-4.97632	-6.63705	-2.4083	-9.58149	-2.25174	-5.82029	-4.80237	-2.44819	-3.41818	-3.25177	-4.39971	-2.52445	-4.86299	-5.33299	-0.435368	-2.4458	-4.4635	-4.52524	-2.77466	-3.27887	-4.59788	-7.50205	-4.70629	-3.22192	-8.88834	-2.91199	-8.48288	-7.97205	-5.68967	-3.20988
22279	Peromyscus	female	controLPS	-6.48387	-2.1293	-2.63372	-3.69066	-1.45234	-3.8936	-6.19619	-7.17702	-6.88934	-2.50419	-7.58248	-1.84108	-1.77886	-3.93183	-2.54878	-3.25835	-4.94343	-6.32972	-2.6092	-8.27563	-1.19982	-4.74927	-3.47161	-2.34871	-3.5307	-3.09948	-3.76477	-1.86053	-4.44699	-5.79072	0.21378	-2.21417	-4.44699	-4.1485	-2.63372	-2.97731	-4.69211	-6.48387	-5.05676	-1.63184	-8.27563	-3.06614	-8.27563	-8.27563	-5.71068	-1.7217
22282	Peromyscus	female	controLPS	-6.13686	-2.00892	-2.84288	-3.65196	-1.36703	-4.10871	-7.05315	-9.1326	-5.9971	-2.453	-6.18816	-3.00573	-2.46819	-2.97562	-3.51219	-3.14866	-5.95454	-5.83676	-1.84298	-9.1326	-0.787377	-4.68994	-4.16278	-2.80287	-2.88649	-3.46617	-3.78074	-1.64598	-4.3451	-4.97371	-0.589149	-2.75757	-4.49787	-4.379	-2.60318	-2.87493	-4.78879	-6.93537	-4.84214	-2.85407	-9.1326	-3.08286	-9.1326	-9.1326	-4.94294	-1.72346
22315	Peromyscus	male	controLPS	-5.97515	-2.22502	-2.60062	-3.7378	-2.10944	-3.77209	-7.53329	-8.22644	-7.31015	-3.37832	-6.147	-2.34173	-1.93672	-3.82584	-3.196	-3.34743	-8.91959	-6.35464	-2.35011	-8.91959	-1.28428	-4.50075	-3.63132	-2.42281	-3.64147	-3.58205	-3.97083	-1.99301	-5.18192	-5.70071	0.169941	-2.09957	-4.67109	-5.45385	-2.71908	-3.13884	-4.98776	-8.91959	-4.85914	-1.88432	-8.91959	-2.68714	-8.91959	-8.91959	-5.55229	-2.17789
22321	Peromyscus	male	controLPS	-6.87213	-1.90058	-2.53484	-3.33844	-1.79228	-3.52222	-4.73206	-6.46666	-5.48583	-2.36402	-8.25842	-1.90928	-1.85154	-3.03268	-2.39764	-2.70935	-8.25842	-5.48583	-1.36477	-8.25842	-0.898955	-3.50483	-3.82761	-2.44429	-2.88314	-3.56707	-3.16467	-1.57882	-3.82761	-5.08037	0.428345	-2.14033	-4.25109	-2.82034	-2.4563	-2.67869	-4.21537	-6.46666	-4.62084	-0.986719	-8.25842	-2.66371	-8.25842	-6.87213	-5.36805	-1.729
22335	Peromyscus	male	controLPS	-6.5024	-2.15521	-2.73716	-3.97841	-1.71854	-3.83276	-7.33531	-8.02846	-6.54685	-2.58431	-7.84613	-2.28417	-1.89897	-3.53533	-2.85005	-3.2993	-8.2516	-6.45984	-2.22453	-9.63789	-1.01905	-4.19116	-3.66663	-2.93839	-3.3688	-3.39957	-3.65144	-1.68072	-3.68206	-5.1161	-0.381528	-2.16767	-4.61401	-4.14896	-2.75443	-3.17019	-4.65429	-7.07294	-4.91051	-3.03395	-8.53928	-3.04348	-9.63789	-8.02846	-6.00031	-1.70949
22341b	Peromyscus	male	controLPS	-5.99595	-2.05632	-2.455	-3.30811	-1.79875	-3.74466	-2.90491	-7.60539	-7.19993	-2.60818	-4.00808	-2.43207	-2.24881	-3.05152	-2.94668	-2.56844	-6.91225	-4.80203	-1.69731	-8.29854	-0.749984	-3.94183	-4.40672	-2.63558	-3.14525	-3.74466	-3.84419	-1.56039	-3.8797	-4.89734	0.293947	-2.12893	-4.17141	-5.81363	-2.53649	-2.455	-4.03586	-5.81363	-4.8328	-0.412458	-8.29854	-3.3569	-8.29854	-6.91225	-5.3541	-1.92181
22258	Peromyscus	female	LPS	-1.95894	-2.53324	-2.49821	-4.17547	0.429879	-1.91316	-0.830499	-3.64381	-4.56786	-1.0077	-1.75082	-4.05185	-3.09753	-3.10352	-3.27331	-2.92773	-2.24471	-4.81732	-3.74118	-4.46901	0.594177	-5.86714	-2.74625	-4.83413	-0.762641	-0.961515	-1.35471	-0.17791	-6.60908	-1.06	0.227502	-1.46742	-2.52479	-1.24077	-1.69496	-0.423077	-2.9177	-0.191041	-3.09158	-2.09056	-6.71444	-1.2577	-6.96575	-6.96575	-6.60908	0.475147
22278	Peromyscus	female	LPS	-2.65566	-2.08216	-2.21044	-4.6256	1.25255	-1.26198	1.0395	-3.96489	-5.70316	0.408449	-0.808588	-3.68825	-3.64743	-2.32301	-3.79361	-4.19908	-1.50878	-4.81218	-2.89602	-5.43122	1.38546	-6.17316	-3.12389	-5.01001	-0.146329	-0.300761	-0.493671	0.54549	-5.83669	-0.620977	0.865008	-2.51732	-1.53069	-2.76532	-1.33688	0.0571237	-2.34018	-0.118252	-3.17244	-1.33371	-8.47575	-2.30823	-5.53131	-7.08945	-5.99084	0.746029
22281	Peromyscus	female	LPS	-1.54219	-2.23774	-2.25442	-4.46151	1.10231	-1.69411	0.224687	-3.47038	-5.26926	-0.249048	-1.16803	-4.08841	-3.1916	-2.88971	-3.24299	-3.64563	-2.33921	-5.11103	-3.79744	-4.46151	1.12178	-6.3397	-2.75734	-5.00689	-0.46313	-0.619249	-0.670248	0.423273	-6.42671	-0.661803	0.479545	-1.80934	-2.55362	-1.52042	-1.42704	-0.0728926	-2.36941	0.29384	-2.84952	-2.27067	-6.62738	-1.50706	-6.9528	-7.11986	-5.1483	0.806943
22284	Peromyscus	female	LPS	-1.68542	-1.26816	-1.8649	-4.82652	0.873132	-1.42024	0.0390176	-2.78607	-3.47312	0.879843	-1.60108	-4.09303	-3.88468	-1.84441	-4.05969	-4.32753	-1.24792	-5.14204	-0.445822	-2.35147	0.257799	-6.17813	-3.35838	-5.50798	0.350556	-0.302309	-1.15635	0.386684	-5.5803	-0.0715148	0.564909	-2.31263	-2.27067	-3.78024	-0.592588	-0.25875	-2.15035	-0.269186	-0.822404	-3.1711	-7.88288	-2.4448	-6.22465	-9.26918	-3.91259	0.633212
22289	Peromyscus	female	LPS	-2.2504	-2.42894	-2.5425	-4.73719	0.809712	-1.77733	0.18403	-4.33173	-5.04014	-1.23246	-1.20351	-3.72147	-3.43379	-2.4919	-3.34523	-4.02157	-1.44346	-5.7488	-2.806	-4.33173	1.00216	-5.63101	-3.19351	-4.78371	-0.487564	-0.772493	-1.07276	-0.0704379	-5.13699	-0.755603	0.266218	-2.4426	-2.1203	-2.95686	-1.64203	-0.460371	-2.28501	0.0711018	-3.23312	-3.35946	-9.21453	-2.38474	-7.42277	-7.01731	-5.50096	0.583707
22292	Peromyscus	female	LPS	-2.12593	-2.1942	-2.51578	-4.77008	0.715547	-1.57491	0.217044	-4.15876	-5.49221	-0.772141	-1.11313	-4.0841	-3.57184	-2.44489	-3.21344	-3.98814	-2.33772	-4.94104	-2.93636	-5.40766	1.14315	-5.61738	-2.257	-4.74191	-0.621968	-0.525264	-1.02024	0.277485	-6.53367	-0.867529	0.306433	-2.02006	-2.10087	-2.67998	-1.45954	-0.0533676	-2.4877	0.286894	-3.06533	-2.16001	-9.01857	-1.9487	-6.53367	-8.32543	-5.43506	0.6112
22316	Peromyscus	male	LPS	-1.58951	-2.5833	-2.56422	-4.55194	0.937094	-1.75944	0.0293858	-3.37594	-5.02886	-0.392697	-1.71333	-4.47455	-3.95525	-2.74309	-3.62878	-4.66114	-2.27026	-4.25567	-3.7761	-4.14265	0.864723	-6.37879	-2.63942	-5.12603	-0.403709	-0.757096	-0.940711	0.206297	-7.91923	-0.567863	0.527464	-1.96946	-2.34962	-3.14292	-1.4065	-0.127299	-2.98716	-0.239213	-3.13452	-2.01751	-6.12748	-1.80334	-5.79897	-8.3247	-6.3098	0.730681
22319	Peromyscus	male	LPS	-1.5761	-2.18652	-2.2592	-4.95198	1.11022	-1.54173	0.640619	-3.16782	-4.86497	-0.452674	-0.832572	-4.07273	-3.37019	-2.57707	-3.56568	-4.92951	-1.95852	-5.33497	-3.14892	-4.24753	1.16562	-6.25126	-3.13405	-5.90295	-0.281489	-0.609059	-0.907334	0.398694	-6.94441	-0.464364	0.587322	-2.68643	-2.06161	-4.48767	-1.51141	0.0319395	-2.72981	-0.285542	-3.04581	-3.08368	-7.63756	-2.30484	-5.69165	-8.73617	-5.55811	0.855345
22325	Peromyscus	male	LPS	-1.99084	-2.46084	-2.34602	-4.44816	0.697495	-1.85687	0.099145	-4.20481	-4.71564	-0.306807	-1.62157	-3.65785	-3.14425	-2.78896	-3.68602	-3.92718	-2.68925	-4.85874	-3.49974	-4.62641	0.938441	-6.73054	-2.83668	-5.85507	-0.422442	-0.651981	-1.07071	0.119691	-7.24137	-0.823817	0.231892	-1.95226	-2.10557	-2.94863	-1.39589	-0.355345	-3.2493	-0.221027	-2.93057	-2.08711	-7.64683	-1.8584	-5.81425	-9.03313	-5.73729	0.480278
22327	Peromyscus	male	LPS	-1.38069	-2.03907	-2.22427	-3.39002	1.31813	-1.55744	0.259912	-4.05577	-5.10174	0.284869	-1.54201	-3.77487	-3.39002	-2.23297	-3.20078	-4.33449	-1.78895	-4.37085	-2.81466	-4.08317	1.39886	-5.36411	-2.404	-6.05725	-0.0708003	-0.209081	-0.381869	0.507731	-5.87493	-0.536592	1.54655	-1.84958	-2.00721	-3.20078	-1.03074	0.194266	-1.6336	-0.0758381	-2.81466	-0.229484	-7.66669	-1.81162	-5.02763	-6.56808	-5.72078	0.806551
22332	Peromyscus	male	LPS	-1.50267	-1.98296	-2.26102	-4.38841	1.51527	-1.23394	0.944314	-3.41654	-4.83024	0.0967475	-1.05196	-3.97503	-3.76937	-2.5407	-3.63184	-4.13709	-2.21122	-5.26387	-2.88169	-4.52876	1.54869	-6.73978	-2.39597	-5.41802	-0.0589256	-0.272664	-0.334345	0.551961	-7.43293	-0.361566	0.740436	-2.19383	-1.89264	-3.66593	-1.48751	-0.130094	-2.18722	0.0210688	-2.96129	-1.93781	-7.20978	-2.00578	-5.41802	-7.72061	-4.59971	0.91015
22339	Peromyscus	male	LPS	-1.88556	-2.28252	-2.33955	-4.32791	0.920523	-1.64518	0.873346	-3.41879	-5.58067	0.0742258	-1.0079	-4.11915	-3.8424	-2.53022	-4.38297	-4.66438	-1.96302	-5.17521	-3.85345	-5.02106	1.14653	-5.52005	-3.24732	-6.15604	-0.441937	-0.609125	-0.762409	0.294258	-7.66011	-0.681435	0.682487	-2.91954	-1.64396	-4.25892	-1.48633	-0.283919	-2.75114	0.0051704	-3.59967	-2.21553	-8.35326	-2.46438	-6.05068	-6.5615	-7.66011	0.699489
[truncated: 58 more columns]
