# Supplementary material for: The infection-tolerant white-footed deermouse tempers interferon responses to endotoxin in comparison to the mouse and rat
Source: eLife. 2024 Jan 9;12:RP90135. doi: 10.7554/eLife.90135 (PMC10945503; doi:10.7554/eLife.90135)
Supplement: Source data 1. [file elife-90135-data1.xlsx]

## Sheet: TableS3_targeted
Supplementary File 1-Source Data 1. Natural logarithms of ratios of transcripts of selected genes (columns E-DO) to Ptrc transcripts in blood of Mus musculus CD-1 (Mus) or Peromyscus leucopus LL stock in blood of animals with (LPS) or without (control) treatment with lipopolysaccharide by individual animals; columns DQ-DU are ratios of transcripts of four pairs of genes.
animal	genus	sex	treatment	Acod1	Akt1	Akt2	Arg1	Bcl3	Camp	Ccl2	Ccl3	Ccl4	Cd14	Cd177	Cd3d	Cd4	Cd69	Cd8	Cfb	Cgas	Csf1	Csf1r	Csf2	Csf3	Csf3r	Cx3cr1	Cxcl1	Cxcl10	Cxcl2	Cxcl3	Dhx58	ERV Env	ERV Gag-pol	Fcer2	Fcgr2a	Fcgr2b	Fcgr3/Cd16	Fgr	Fos	Fpr2	Gapdh	Gbp4	Glrx	Gzmb	Hif1a	Hk3	Hmox1	Ibsp	Icam
MM19	Mus	female	control	-6.83	-2.66	-1.83	-5.66	-4.74	-5.37	-9.38	-6.69	-6.31	-3.65	-3.77	-2.6	-2.8	-4.34	-3.42	-5.53	-6.4	-4.92	-1.58	-9.38	-9.38	-0.41	-3.66	-9.38	-8.71	-9.38	-7	-4.79	0.16	1.24	-2.01	-2.62	-3.44	-3.22	-2.12	-4.33	-3.26	-0.45	-2.98	-2.87	-5.03	-2.97	-3.35	-4.31	-7.2	-4.26
MM21	Mus	female	control	-6.94	-2.31	-1.98	-7.04	-4.05	-6.08	-9.28	-5.58	-6.08	-3.66	-4.53	-2.17	-2.43	-4.09	-3.54	-4.92	-6.39	-5.03	-1.03	-9.34	-9.28	-0.79	-3.41	-9.28	-7.04	-9.28	-7.26	-4.42	-0.18	1.24	-2.28	-2.76	-4.01	-2.4	-1.82	-4.35	-3.73	-0.3	-2.31	-3.25	-4.06	-3.04	-3.48	-4.08	-8.65	-3.81
MM23	Mus	female	control	-7	-2.13	-1.79	-5.96	-3.61	-4.96	-7.69	-5.61	-6.23	-3.52	-3.41	-2.22	-2.56	-3.82	-3.38	-5.46	-6.38	-5.46	-1.66	-8.8	-8.8	-1.12	-4.03	-7.4	-8.8	-8.1	-8.8	-4.43	1.09	2.13	-2.03	-2.96	-3.04	-4.17	-2.51	-4.5	-4.06	-0.3	-2.44	-2.53	-4.68	-2.53	-4.13	-4.65	-8.1	-3.61
MM25	Mus	female	control	-6.91	-2.33	-2	-5.22	-3.62	-6.32	-9.16	-5.3	-6.73	-2.75	-2.96	-2.78	-3.04	-4.15	-3.91	-6.03	-7.13	-4.6	-1.59	-9.16	-9.16	-0.27	-3.68	-9.16	-9.16	-9.16	-8.52	-4.64	0.03	1.18	-1.55	-2.7	-3.22	-2.61	-1.99	-4.42	-3.2	-0.48	-2.68	-2.7	-4.1	-3.08	-3.32	-4.28	-7.6	-3.74
MM27	Mus	female	control	-6.45	-2.23	-1.75	-5.87	-3.3	-4.71	-8.78	-5.28	-6.56	-1.75	-2.45	-2.33	-2.58	-4.75	-3.59	-4.21	-6.56	-4.47	-1.71	-7.95	-8.78	0.12	-4.31	-8.78	-6.56	-6.85	-7.95	-4.43	-0.08	1.05	-2.55	-2.02	-3.73	-3.19	-1.68	-3.99	-2.72	-0.2	-2.38	-2.63	-4.35	-3.19	-2.79	-3.95	-7.55	-3.74
MM17	Mus	male	control	-4.37	-2.19	-1.78	-3.86	-2.87	-4.37	-9.11	-4.95	-5.29	-1.52	-3.35	-2.72	-3.43	-4.81	-4.22	-4.38	-6.89	-3.37	-1.58	-9.11	-7.82	0.9	-3.75	-9.2	-8.1	-8.51	-7.59	-4.4	-0.74	0.46	-3.83	-1.49	-3.31	-2.24	-1.17	-2.82	-2.05	-0.42	-2.11	-2.34	-2.91	-2.57	-2.17	-3.29	-5.37	-3.67
MM1	Mus	male	control	-6.5	-2.31	-2.11	-8.99	-3.98	-6.5	-8.29	-6.15	-8.29	-3.13	-2.98	-2.62	-2.86	-3.92	-3.54	-5.32	-5.9	-4.88	-1.15	-8.8	-8.8	-0.4	-3.15	-8.8	-8.29	-8.8	-6.42	-3.96	-0.18	1.32	-2.07	-2.51	-3.45	-3.19	-1.97	-3.84	-3.63	-0.5	-2.53	-2.78	-5.05	-2.86	-3.41	-4.11	-8.8	-3.68
MM3	Mus	male	control	-8.36	-1.88	-1.78	-7.66	-3.67	-6.28	-6.97	-6.22	-5.96	-3.85	-6.97	-2.4	-3.18	-4.13	-4.26	-4.31	-6.65	-5.47	-1.23	-9.06	-8.36	-1.2	-3.08	-9.06	-7.66	-9.06	-9.06	-4.72	-0.04	1.48	-1.92	-2.88	-3.3	-2.9	-2.17	-4.15	-3.32	-0.44	-2.24	-3.39	-4.46	-2.93	-3.46	-3.76	-7.66	-3.17
MM5	Mus	male	control	-5.98	-2.33	-2.21	-9.08	-4.39	-7.28	-9.11	-6.13	-5.82	-3.11	-3.28	-2.58	-3.03	-4.23	-3.8	-5.01	-6.68	-4.6	-1.48	-8.38	-9.11	-0.28	-3.44	-9.11	-7.28	-9.11	-8.38	-4.37	-0.26	0.84	-2.22	-2.62	-3.21	-3.3	-2.16	-3.88	-3.44	-0.67	-2.49	-3.05	-3.78	-3.03	-3.74	-4.47	-7.69	-3.67
MM7	Mus	male	control	-7.95	-2.84	-2.59	-8.65	-4.36	-5.81	-9.43	-5.94	-5.7	-4.17	-3.18	-2.61	-2.98	-4.34	-3.7	-5.53	-5.73	-5.28	-1.54	-7.55	-9.43	-0.57	-3.29	-9.43	-7.95	-9.43	-9.43	-4.65	-0.72	0.73	-2.19	-2.86	-3.49	-3.64	-2.23	-4.69	-3.58	-0.6	-2.36	-3.48	-3.78	-3.09	-3.45	-4.43	-7.14	-3.9
MM31	Mus	female	LPS	-1.26	-2.87	-0.99	-2.95	-1.65	-1.52	-4.45	-0.98	-0.96	-0.49	-2.51	-3.14	-3.49	-1.25	-4.31	-3.02	-3.84	-3.4	-3.47	-4.4	-5.36	-1.76	-4.15	-3.78	-1.31	-1.96	-3.86	-1.76	1.06	2.74	-5.5	-2.1	-2.46	-3.1	-2.11	-3.75	-1.71	0.22	-0.28	-2.01	0.92	-1.87	-2.97	-3.86	-4.26	-1.2
MM33	Mus	female	LPS	-0.75	-2.71	-1.28	-4.52	-1.16	-1.6	-3.86	-1.22	-0.95	0.34	-2.52	-2.44	-3.11	-0.86	-3.83	-0.38	-3.96	-3.71	-2.56	-6.6	-3.43	-1.67	-5.91	-1.77	-0.21	-1.46	-3.25	-1.21	1.24	2.44	-3.9	-1.42	-1.67	-2.19	-1.97	-3.51	-1.59	0.28	0.11	-2.16	0.48	-1.36	-2.52	-3.01	-5.1	-1.1
MM35	Mus	female	LPS	-0.94	-2.62	-0.76	-2.38	-1.03	0.09	-4.02	-1.34	-1.03	-0.01	-0.22	-2.51	-3.61	-1.72	-3.57	-2.19	-3.51	-3.93	-3.09	-4.39	-7.48	-0.39	-5.4	-5.69	-0.77	-2.56	-4.05	-1.12	1.32	2.68	-4.44	-1.24	-1.54	-1.93	-1.08	-5.18	-0.46	0.62	-0.07	-1.12	0.56	-1.57	-2.3	-2.96	-2.75	-1.04
MM37	Mus	female	LPS	-1.6	-2.94	-1.23	-5.69	-1.44	-1.59	-4.1	-1.57	-1.5	-1.26	-1.83	-3.35	-4.2	-1.81	-3.95	-2.45	-3.94	-3.62	-3.11	-5.91	-4.9	-1.51	-6.6	-4.04	-1.08	-2.97	-4.77	-1.5	1.28	2.84	-4.16	-1.92	-2.24	-2.67	-1.93	-5.42	-1.59	0.07	-0.05	-2.33	0.45	-1.79	-3.67	-3.68	-6.6	-1.12
MM39	Mus	female	LPS	-0.39	-2.11	-0.38	-2.28	-1.3	-1.68	-2.19	-1.09	-0.88	-0.39	-2.29	-3.67	-4.58	-1.29	-4.69	-0.3	-4.36	-3.25	-2.01	-4.49	-2.7	-1.22	-4.81	-2.64	-0.06	-2.13	-3.08	-0.82	2.54	3.66	-4.25	-1.64	-2.16	-1.15	-1.28	-4.11	-1.08	0.83	0.34	-1.18	0.52	-0.97	-2.92	-2.16	-3.89	-0.86
MM11	Mus	male	LPS	-1.52	-2.22	-2.8	-6.62	-1.97	-3.67	-6.53	-2.57	-3.45	-1.86	-3.87	-4.1	-3.26	-2.34	-4.01	-3.53	-4.23	-4.43	-4.19	-7.13	-4.22	-1.74	-7.3	-5.77	-4.43	-2.03	-4.85	-3.33	0.48	2.13	-2.94	-3.78	-2.56	-5.21	-2.39	-3.47	-2.68	-2.54	-1.06	-4.67	-1.79	-2.59	-2.6	-6	-7.56	-1.49
MM13	Mus	male	LPS	-0.19	-2.54	-1.62	-2.34	-2.02	-0.32	-7.34	-2.25	-2.65	0.78	-0.47	-2.41	-2.88	-1.81	-3.59	-4.68	-4.59	-5.22	-2.91	-6.65	-3.66	-0.65	-5.87	-4.47	-4.59	-0.79	-3.18	-4.36	0.67	2.19	-3.96	-2.05	-2.93	-3.45	-2.2	-2.43	-1.6	0.03	-1.59	-1.98	-1.17	-1.76	-1.88	-4.91	-3.82	-1.43
MM15	Mus	male	LPS	-0.67	-3.36	-1.64	-2.86	-1.93	-0.21	-3.57	-0.87	-0.96	-0.01	-1.25	-3.27	-4.1	-1.94	-4.56	-2.04	-3.82	-4.19	-3.44	-5.21	-5.04	-1.34	-5.6	-4.17	-0.49	-1.97	-3.61	-1.82	0.46	2.08	-4.73	-1.47	-2.1	-2.38	-1.79	-3.94	-1.09	-0.23	-0.49	-1.91	0.87	-1.58	-2.67	-3.41	-3.77	-1.49
MM29	Mus	male	LPS	-1.26	-2.89	-1.26	-3.56	-1.45	-0.94	-4.37	-1.46	-1.66	-0.92	-2.07	-3.02	-3.48	-1.67	-3.83	-2.54	-4.14	-4.59	-3.41	-5.1	-6.89	-1	-5.39	-3.98	-0.92	-3.27	-5.1	-1.49	1.14	2.42	-3.35	-2.03	-2.97	-2.38	-1.78	-5.29	-1.45	0.43	0.29	-2.03	-0.06	-1.9	-3.19	-2.8	-7.59	-0.84
MM9	Mus	male	LPS	-0.88	-2.61	-0.96	-6.74	-1.72	-1.11	-3.24	-1.47	-1.23	-0.23	-1.44	-2.73	-3.21	-1.27	-4.21	-0.84	-4.17	-4.14	-2.32	-5.49	-4.79	-0.71	-5.64	-2.67	-0.79	-2.16	-3.56	-1.17	2.04	2.96	-4.34	-1.37	-1.4	-2.11	-1.71	-3.48	-0.78	0.43	0.52	-1.67	-0.18	-1.15	-2.85	-3.03	-5.82	-1.41
24841	Peromyscus	female	control	-6.67	-2.17	-2.83	-2.68	-4.27	-5.63	-9.5	-8.66	-3.44	-2.07	-6.56	-2.35	-2.07	-3.45	-2.62	-4.9	-5.19	-6.13	-1.26	-10.53	-10.53	-1.77	-3.74	-10.6	-9.5	-8.81	-8.81	-3.89	-2.85	-1.56	-2.76	-3.13	-3.99	-3.07	-1.91	-4.92	-4.7	-0.68	-2.52	-4.68	-3.3	-2.55	-2.9	-4.39	-10.53	-4.56
24842	Peromyscus	female	control	-5.26	-1.86	-2.9	-1.53	-4.1	-4.35	-10.12	-6.72	-2.1	-2.28	-5.14	-2.49	-2.28	-3.07	-2.64	-5.39	-4.91	-6.1	-1.1	-9.4	-10.12	-0.63	-4.65	-10.12	-7.89	-8.01	-8.01	-3.72	-2.75	-1.19	-2.73	-2.63	-3.52	-3.14	-1.37	-3.66	-4.99	-0.26	-2.48	-4.48	-2.07	-2.49	-2.26	-3.81	-8.71	-4.09
24843	Peromyscus	female	control	-6.14	-1.96	-2.87	-1.35	-4.06	-3.64	-8.74	-8.34	-2.18	-2.51	-4.63	-2.74	-2.51	-3.24	-3.31	-3.24	-5.52	-5.28	-1.12	-10.2	-10.2	-0.82	-3.6	-9.43	-8.18	-9.43	-9.43	-4.62	-3.32	-1.35	-3.34	-2.68	-3.47	-2.93	-1.53	-2.94	-4.53	-0.48	-2.6	-4.3	-5.01	-2.47	-2.57	-3.8	-8.34	-4.25
24845	Peromyscus	female	control	-5.57	-2.07	-2.88	-0.78	-4.3	-6.76	-10.3	-10.3	-1.9	-2.22	-6.21	-2.03	-2.22	-2.88	-2.83	-7.14	-5.27	-6.63	-1.64	-10.3	-10.3	-0.63	-3.69	-10.3	-7.32	-10.3	-9.85	-4.69	-3.05	-1.44	-2.42	-2.82	-3.97	-3.4	-1.52	-3.88	-5.24	-0.53	-2.75	-4.32	-4.24	-2.74	-2.59	-4.35	-8.6	-4.99
24853	Peromyscus	female	control	-5.58	-2.04	-2.81	-1.92	-4.13	-6.48	-8.17	-7.41	-2.62	-2.72	-6.25	-2.89	-2.72	-3.21	-2.53	-5.53	-4.74	-5.93	-1.38	-8.73	-10.12	-0.95	-3.66	-10.12	-6.86	-10.12	-10.12	-3.62	-3.13	-1.4	-3	-2.44	-3.58	-3.42	-1.64	-4.03	-4.97	-0.42	-2.37	-4.35	-2.56	-2.38	-2.65	-4.12	-10.12	-4.39
24852	Peromyscus	male	control	-6.06	-1.78	-2.73	-1.54	-3.94	-5.35	-7.93	-8.53	-2.34	-2.31	-5.23	-2.7	-2.31	-3.36	-2.86	-5.03	-4.85	-5.4	-0.95	-10.55	-10.55	-0.88	-4.06	-10.55	-7.27	-10.55	-10.55	-3.04	-2.87	-1.32	-3.09	-2.36	-3.73	-3.25	-1.29	-3.68	-4.78	-0.51	-1.96	-4.26	-3.11	-2.45	-2.15	-4.17	-8.63	-4.07
24861	Peromyscus	male	control	-6.41	-1.86	-2.8	-1.47	-3.78	-5.45	-6.39	-8.31	-2.29	-2.23	-5.87	-2.27	-2.23	-3.31	-2.69	-3.74	-5.17	-5.66	-1.07	-9.23	-10.37	-0.95	-3.53	-8.82	-7.97	-8.41	-9.51	-3.83	-2.99	-1.85	-2.79	-2.68	-3.68	-3.1	-1.31	-4.38	-4.99	-0.47	-2.61	-4.2	-3.72	-2.58	-2.7	-4.18	-10.37	-4.52
24863	Peromyscus	male	control	-6.31	-1.76	-2.87	-0.49	-3.77	-2.43	-10.37	-7.94	-1.43	-2.86	-2.79	-2.98	-2.86	-3.52	-3.64	-3.42	-5.35	-5.62	-0.42	-10.37	-10.37	-0.82	-2.67	-10.37	-7.03	-10.37	-10.37	-3.67	-3.26	-2.03	-3	-2.52	-3.68	-2.31	-0.87	-3.57	-3.66	0	-2.69	-4.27	-4.39	-2.29	-1.86	-3.63	-5.07	-4.17
24869	Peromyscus	male	control	-6.78	-1.97	-2.82	-1.94	-4.22	-6.6	-7.7	-9.08	-2.35	-2.42	-6.25	-2.65	-2.42	-3.31	-3.36	-6.19	-5.81	-4.93	-1.26	-10.28	-10.28	-1.17	-3.37	-9.78	-10.28	-9.78	-10.28	-4.52	-3.01	-1.26	-2.91	-2.65	-3.64	-3.84	-1.49	-4.01	-5.19	-0.49	-2.69	-4.69	-4.35	-2.53	-2.98	-4.05	-7.99	-4.51
24876	Peromyscus	male	control	-4.61	-1.63	-2.72	0.27	-3.09	-5.48	-6.31	-7.37	-0.82	-2.63	-5.58	-2.54	-2.63	-3.01	-2.97	-3.77	-5.17	-5.4	-1.2	-10.15	-8.98	0.02	-3.48	-6.78	-10.15	-5.82	-6.18	-3.44	-3.13	-1.18	-2.83	-1.98	-3.66	-2.62	-0.88	-3.97	-4.35	-0.22	-2.4	-4.34	-2.7	-2.34	-1.92	-3.99	-8.29	-4.22
24846	Peromyscus	female	LPS	-1.93	-2.33	-2.41	0.45	-2.23	-0.4	-5.46	-3.3	-0.57	-1.82	-1.98	-1.89	-1.82	-2.82	-1.75	-1.28	-4.12	-4.78	-3.42	-7.44	-3.71	0.44	-5.83	-3.9	-4.22	-2.75	-3.04	-2.79	-3.36	-0.02	-4.68	-0.62	-1.11	-1.03	-0.16	-6.08	-0.91	-0.1	-1.87	-2.68	-1.39	-1.44	-0.82	-2.37	-1.36	-2.45
24847	Peromyscus	female	LPS	-1.82	-2.57	-2.71	0.67	-2.1	-0.82	-6.56	-4.02	-1.01	-3.55	-1.76	-4.02	-3.55	-3.81	-3.88	-2.28	-4.53	-4.33	-3.84	-10.35	-4.51	0.61	-6.5	-6.58	-6.12	-4.18	-4.28	-3.39	-4.01	0.08	-4.84	-0.36	-0.78	-1.19	0.14	-6.56	-1.1	-0.23	-2.32	-2.41	-3.02	-1.57	-0.44	-2.93	-0.4	-2.48
24848	Peromyscus	female	LPS	-1.23	-2.12	-2.71	0.95	-2.2	-1.55	-3.31	-3.66	-0.45	-3.7	-2.44	-3.58	-3.7	-4.41	-3.36	-2.41	-4.85	-4.6	-2.16	-8.88	-5.96	0.55	-5.05	-6.18	-5.63	-4.07	-4.27	-2.97	-3.65	-0.91	-4.25	-0.39	-1.27	-0.99	0	-6.68	-1.09	-0.04	-2.27	-2.71	-1.84	-1.41	-0.4	-3.69	-0.86	-2.68
24850	Peromyscus	female	LPS	-1.13	-2.48	-2.69	1.16	-2.4	-1.41	-5.17	-3.33	-0.21	-3.57	-1.75	-4.03	-3.57	-4.99	-3.7	-1.48	-4.62	-5.76	-1.88	-10.81	-5.82	0.97	-4.75	-6.04	-5.77	-4.08	-4.3	-2.28	-3.77	-0.67	-4.82	-0.61	-1.26	-0.74	-0.02	-6.45	-0.99	-0.21	-2.06	-2.48	-1.89	-1.49	-0.3	-3.02	-0.51	-2.87
24851	Peromyscus	female	LPS	-1.45	-2.54	-2.62	0.92	-1.77	0.09	-6.04	-2.72	-0.72	-4.84	-1.62	-5.02	-4.84	-3.9	-4.24	-1.59	-4.55	-4.38	-3.01	-6.99	-4.03	0.62	-5.79	-5.44	-4.46	-3.71	-3.91	-2.82	-3.43	-0.45	-5.93	-0.11	-0.69	-0.77	0.34	-6.85	-0.39	-0.06	-2	-2.44	-2.18	-1.27	-0.1	-2.29	-0.45	-2.46
24855	Peromyscus	male	LPS	-1.01	-2.13	-2.41	0.84	-1.39	-0.27	-3.6	-2.44	-0.25	-3.39	-1.91	-2.98	-3.39	-2.85	-2.69	-1.16	-4.05	-3.57	-3.15	-5.24	-3.37	0.34	-5.12	-3.38	-3.16	-2.44	-2.85	-2.31	-2.96	0	-4.17	0.01	-1.11	-0.84	0.14	-5.41	-0.31	0.9	-1.86	-2.3	-0.97	-1.69	-0.09	-2.65	-0.34	-1.79
24860	Peromyscus	male	LPS	-1	-2.38	-2.57	0.81	-1.2	0.3	-5.17	-3.24	-0.47	-5.25	-0.95	-5.83	-5.25	-4.2	-5.17	-1.29	-4.44	-4.12	-2.09	-8.28	-3.34	0.96	-6.59	-5.32	-4.66	-3.71	-3.91	-2.9	-3.12	-0.56	-6.12	-0.35	-1.25	-0.88	0.5	-5.63	-0.55	0.38	-2.63	-2.65	-3.58	-1.38	-0.07	-2.13	0.56	-2.89
24865	Peromyscus	male	LPS	-0.37	-1.34	-1.72	1.38	-1.22	-0.94	-3.53	-1.8	0.88	-4.81	-2.23	-4.57	-4.81	-2.92	-4.7	-0.49	-4.2	-3.6	-1.16	-7.56	-1.35	-0.28	-6.42	-0.55	-2.5	0.82	0.63	-2.34	-3.2	-0.45	-4.74	0.57	-0.66	-0.19	0.34	-5.07	-0.05	0.98	-1.49	-1.75	-2.65	0.22	-0.88	-1.51	-0.85	-0.44
24873	Peromyscus	male	LPS	-1.92	-2.13	-2.44	0.16	-1.78	-0.35	-6.66	-3	-1.01	-3.36	-2.13	-3.24	-3.36	-2.05	-3.3	-2.56	-3.52	-4.17	-3.18	-6.25	-3.89	0.28	-6.95	-5.74	-3.84	-3.86	-4.04	-2.41	-2.8	0.04	-2.77	-0.78	-1.1	-1.31	-0.11	-6.25	-1.04	1.11	-1.21	-2.83	-1.43	-1.61	-0.75	-3.1	-1.52	-2.59
24879	Peromyscus	male	LPS	-1	-1.78	-2.07	0.37	-1.62	-1.1	-3.55	-1.56	0.81	-4.87	-2.62	-4.83	-4.87	-2.74	-5.69	-0.36	-4.04	-4.87	-1.59	-8.34	-1.11	-0.8	-7.14	-0.85	-0.89	-0.12	-0.56	-1.97	-3.8	-0.76	-4.87	-0.03	-1.22	-1	0.06	-5.37	0.17	-0.12	-1.07	-2.01	-3.79	-0.43	-1.23	-1.79	-1.81	-0.47
[truncated: 74 more columns]
