# Supplementary material for: The infection-tolerant white-footed deermouse tempers interferon responses to endotoxin in comparison to the mouse and rat
Source: eLife. 2024 Jan 9;12:RP90135. doi: 10.7554/eLife.90135 (PMC10945503; doi:10.7554/eLife.90135)
Supplement: Table 2—source data 1. [file elife-90135-table2-data1.xlsx]

## Sheet: Sheet1
Table 2-Source Data 1 (RT-qPCR experiment); values of log10 transformed gene copies
name	genus	sex	treatment	log10 Nos2	log10 Arg1	log10 Gapdh
MM17	Mus	F	controLPS	2.07253	1.89111	7.14031
MM19	Mus	F	controLPS	1.96788	1.11815	6.75998
MM23	Mus	F	controLPS	2.11133	1.75857	6.83312
MM25	Mus	F	controLPS	1.41185	1.01773	6.05484
MM27	Mus	F	controLPS	1.69459	1.24645	6.54052
MM1	Mus	M	controLPS	1.51239	1.01532	6.37619
MM21	Mus	M	controLPS	1.29377	0.558091	4.89829
MM3	Mus	M	controLPS	1.69089	1.06337	6.71446
MM5	Mus	M	controLPS	1.72913	1.00719	6.71852
MM7	Mus	M	controLPS	1.56636	0.679847	6.79779
MM13	Mus	F	LPS	2.10606	1.08362	6.69549
MM15	Mus	F	LPS	3.59232	1.11669	6.07626
MM29	Mus	F	LPS	3.38286	0.979456	6.2996
MM31	Mus	F	LPS	2.11967	0.232413	5.04212
MM9	Mus	F	LPS	3.64964	1.34007	6.47622
MM11	Mus	M	LPS	2.92956	1.81731	.
MM33	Mus	M	LPS	3.22767	1.21501	5.98222
MM35	Mus	M	LPS	3.00158	0.205871	5.48917
MM37	Mus	M	LPS	2.79205	0.40801	5.79559
MM39	Mus	M	LPS	2.95533	0.66205	5.6617
24811	Peromyscus	F	controLPS	2.20236	3.44661	5.28572
24842	Peromyscus	F	controLPS	2.34927	3.71427	5.51416
24843	Peromyscus	F	controLPS	2.40595	3.69036	4.27774
24845	Peromyscus	F	controLPS	2.39357	3.79886	5.48453
24853	Peromyscus	F	controLPS	2.12188	3.44219	3.19076
24852	Peromyscus	M	controLPS	2.31357	3.86369	5.57774
24861	Peromyscus	M	controLPS	2.03775	3.25666	5.17071
24863	Peromyscus	M	controLPS	1.98838	3.36373	5.49938
24869	Peromyscus	M	controLPS	2.71741	4.04351	5.36634
24876	Peromyscus	M	controLPS	2.28855	4.03012	5.51267
24846	Peromyscus	F	LPS	2.60373	4.28896	5.07282
24847	Peromyscus	F	LPS	2.68312	5.4176	5.86193
24848	Peromyscus	F	LPS	1.69589	3.37092	5.22307
24850	Peromyscus	F	LPS	2.88181	5.99776	5.41085
24851	Peromyscus	F	LPS	2.28966	3.58142	4.63443
24855	Peromyscus	M	LPS	2.65416	4.13379	5.87978
24860	Peromyscus	M	LPS	1.78542	3.76809	5.92228
24865	Peromyscus	M	LPS	2.0105	3.64756	5.69792
24873	Peromyscus	M	LPS	1.63627	3.25981	4.69097
