# Supplementary material for: The infection-tolerant white-footed deermouse tempers interferon responses to endotoxin in comparison to the mouse and rat
Source: eLife. 2024 Jan 9;12:RP90135. doi: 10.7554/eLife.90135 (PMC10945503; doi:10.7554/eLife.90135)
Supplement: Table 3—source data 1. [file elife-90135-table3-data1.xlsx]

## Sheet: Sheet1
Table 3-Source Data 1. Targeted RNA-seq of P. leucopus 12 h after LPS (1 µg/g) or saline. Values are LN of unique reads for a given gene normalized for Ptprc
animal	animal	23766	24136	24133	25309	25311	25312
	treatment	LPS	LPS	LPS	control	control	control
Akt1		-0.909627	-0.496756	-0.587857	-1.88811	-1.35252	-1.30097
Akt2		-1.1573	-0.839258	-1.27824	-1.99721	-2.14805	-1.64546
Arg1		1.00929	1.0767	1.01577	-2.59388	-0.980049	-2.19347
Cd14		-0.305715	-0.0547343	0.0923147	-3.48452	-1.23572	-2.7983
Cd69		-2.26252	-2.27673	-3.50828	-2.07041	-1.37943	-1.96428
ERV Env		-2.87556	-3.44106	-3.33456	-3.77202	-3.59478	-3.70249
ERV Gag-pol		0.958438	1.33801	0.75783	1.43968	0.942046	0.997715
Fcgr2a		-1.00147	-1.21491	-0.141544	-3.97099	-2.05453	-2.72263
Fcgr2b		-0.805546	-0.374093	-0.0628978	-3.1892	-2.34219	-2.94303
Fcgr3 (Cd16)		-0.403928	-0.38268	0.267686	-3.31276	-2.78399	-3.52506
Gapdh		2.88109	3.61906	3.01026	1.28746	2.379	2.24566
Gbp4		-1.24537	-0.0862935	-1.14031	-1.90943	-2.44227	-2.63307
Ifit1		0.332063	0.973327	-0.354073	-1.07677	-0.944118	-0.986672
Ifng		-6.42894	-4.76752	-5.43063	-7.99753	-6.07702	-7.2331
Il1b		0.427498	-0.216217	0.86684	-1.87345	-0.0884614	-2.09986
Irf7		2.14212	2.95749	2.20243	-2.10387	-2.18805	-2.04552
Isg15		2.64245	3.42645	2.84311	-0.728203	-0.550493	-1.25915
Mx2		0.180426	0.293307	0.336963	-2.86734	-1.14544	-1.53799
Nos2		-5.2692	-5.94495	-6.47634	-7.99753	-4.98035	-7.2331
Oas1a		-0.388177	1.36691	0.152628	-3.48452	-2.49633	-2.22461
Rigi (Ddx58)		-2.27964	-1.28682	-1.70409	-4.07813	-2.61411	-3.11231
Saa3		0.116469	3.918	1.66445	-7.99753	-3.44067	-7.2331
Slpi		-0.475208	-0.717618	0.445454	-6.93321	-3.68177	-4.57579
Sod2		1.0441	1.27675	1.35604	-2.8127	-0.732812	-1.59364
