# Supplementary material for: The infection-tolerant white-footed deermouse tempers interferon responses to endotoxin in comparison to the mouse and rat
Source: eLife. 2024 Jan 9;12:RP90135. doi: 10.7554/eLife.90135 (PMC10945503; doi:10.7554/eLife.90135)
Supplement: Table 4—source data 1. [file elife-90135-table4-data1.xlsx]

## Sheet: Sheet1
Table 4-Source Data 1. Rat experiment. Targeted RNA-seq.
rat	LPS µg/g	Targeted RNA-seq; LN of reads normalized for Ptprc (Cd45) reads
		Acod1	Akt1	Akt2	Arg1	Cd3	Cd14	Cd69	Cd177	Cgas	Cxcl10	Dhx58	ERV Env	ERV Gag-pol	Fcgr2a	Fcgr2b	Fcgr3 (Cd16)	Gapdh	Gbp4	Ibsp	Ifih1	Ifit1	Ifng	Il1b	Il6	Il10	Il12	Irf7	Isg15	Itgam (Cd11b)	Lcn2	Jun	Mmp8	Mx2	Nfkb2	Nos2	Nox1	Oas1	Ptprc	Rigi (Ddx58)	S100a9	Saa1	Slpi	Sod2	Stat1	Stat2	Tlr4	Tnf
9	0	-7.00059	-3.02526	-2.80859	-10.1647	-3.48088	-4.13879	-4.1032	-5.95007	-6.42699	-7.73691	-5.0269	-4.67297	-4.98475	-1.73426	-2.89597	-4.228	-0.6001	-3.32376	-7.82928	-4.00345	-1.82166	-7.79754	-2.34596	-9.65383	-10.1647	-9.47151	-3.32483	-4.29442	-2.29551	-8.26754	-4.31533	-1.87437	-3.41122	-3.30155	-2.4439	-7.89598	-3.56117	1.28357e-05	-4.92115	-0.422182	-7.37145	-3.06216	-2.3345	-2.23854	-3.1412	-5.05871	-5.88799
10	0	-6.73394	-3.24697	-2.88272	-8.93117	-3.22527	-4.94556	-3.95193	-6.46153	-6.66562	-7.34008	-4.89934	-4.81287	-5.23549	-1.96979	-3.39527	-4.29028	-0.921472	-3.21564	-8.23802	-4.0026	-1.95253	-8.19357	-2.40148	-10.2305	-8.55647	-9.94277	-3.01203	-3.90729	-2.62323	-8.43869	-4.68788	-2.5622	-3.18671	-3.65352	-3.03451	-8.19357	-3.52931	1.20184e-05	-4.76945	-1.07569	-7.50042	-3.94818	-2.8041	-2.25626	-3.30617	-5.32518	-6.64693
18	0	-7.64267	-3.43425	-2.99348	-10.533	-3.30792	-4.98591	-3.94	-7.56263	-6.53484	-7.64267	-4.85629	-4.96661	-5.22477	-2.42412	-3.67605	-3.97626	-1.22898	-3.361	-7.82499	-4.01021	-2.81859	-7.09906	-3.29742	-9.61675	-8.74128	-9.8399	-2.77578	-4.35926	-2.90477	-9.28028	-5.09496	-3.0789	-3.0303	-3.86291	-4.24891	-7.82499	-4.07079	1.33206e-05	-4.77099	-1.72184	-7.69983	-4.32647	-2.84642	-2.24426	-3.5474	-5.16707	-7.35499
19	0	-7.27947	-3.39714	-3.07233	-10.3856	-3.49291	-5.06743	-4.10018	-7.23567	-6.59382	-7.95781	-4.97838	-4.8008	-5.14381	-2.38375	-3.63289	-4.18843	-1.32569	-3.3904	-7.77059	-4.07201	-2.56873	-7.47683	-3.10877	-9.28694	-8.71158	-8.77612	-3.19513	-4.23922	-2.83858	-8.65095	-5.01492	-2.81683	-3.23668	-3.76149	-3.79342	-8.15196	-3.91475	1.02917e-05	-4.71567	-1.50687	-7.07745	-4.11646	-2.78515	-2.36517	-3.61438	-5.43916	-7.34103
20	0	-7.07678	-3.5513	-3.14613	-10.1829	-3.66126	-5.18115	-4.028	-7.91418	-6.40628	-8.0626	-4.97155	-4.66943	-4.9899	-2.3381	-3.52485	-4.25682	-1.51673	-3.36612	-7.31118	-3.8084	-2.27619	-7.78496	-3.03268	-9.67203	-9.08425	-9.89518	-3.22536	-3.99186	-2.90377	-8.64242	-5.27512	-2.60642	-3.14028	-3.9783	-3.63464	-7.94927	-3.76613	1.26042e-05	-4.6209	-1.32705	-7.45283	-4.0473	-2.99218	-2.21131	-3.61995	-5.21305	-6.91202
5	5	0.0351181	-3.31159	-1.75872	-5.85549	-3.8659	-1.59929	-2.75596	-0.732767	-4.22543	-1.48499	-1.8852	-0.10676	-0.394929	0.437313	-0.920566	-3.78389	1.06123	-1.06315	-6.46859	-1.65204	-0.0376348	-4.5172	0.158022	-4.14696	-4.95601	-4.39881	-0.132722	-0.00682556	-0.727318	-0.744758	-1.65329	-0.402665	-0.0351595	-0.854905	1.78927	-5.9425	-1.68174	5.96677e-05	-1.58813	1.75624	0.483215	-0.367758	0.543486	-0.80871	-0.976008	-3.66291	-1.9552
6	5	-1.03926	-3.84294	-2.21893	-10.0105	-3.58883	-3.11376	-2.77628	-1.77377	-4.31672	-2.06137	-2.02361	-0.706717	-0.90759	-0.51126	-2.16035	-4.19037	0.426508	-1.30364	-7.52555	-1.74121	-0.503128	-4.99982	-0.806336	-6.05921	-5.65375	-6.00312	-0.605537	-0.716419	-1.85941	-1.8508	-2.53285	-1.06265	0.129209	-1.62178	0.786769	-5.45658	-1.79572	4.49267e-05	-1.87775	0.77847	-0.604467	-1.8006	-0.341363	-0.844382	-1.39053	-3.91238	-3.08388
7	5	-1.06811	-3.73	-1.98048	-8.10953	-3.4	-3.28763	-2.55424	-1.73212	-4.44085	-2.20416	-2.03879	-0.209779	-0.379087	-0.242803	-1.91757	-4.60097	0.595076	-1.25201	-8.10953	-1.66032	-0.0955207	-4.79171	-0.777287	-5.74867	-5.62462	-6.16362	-0.622016	-0.471713	-1.72096	-1.72906	-2.42391	-0.745105	0.0590741	-1.57807	0.934359	-6.28498	-1.82316	6.01305e-05	-1.88023	1.06963	-0.520392	-1.55588	-0.0409347	-0.764677	-1.37636	-3.88123	-3.02316
8	5	-1.20428	-3.72591	-2.29416	-8.68876	-3.91132	-2.83254	-3.48695	-1.04806	-4.96066	-3.52741	-2.68833	-0.380312	-0.7899	-0.136622	-1.58412	-4.51745	0.497311	-1.82705	-7.40782	-2.1779	-0.342305	-6.25514	-0.684325	-6.46955	-6.22066	-7.12014	-1.1177	-0.80245	-1.20349	-1.40257	-2.26616	-0.111598	-0.666385	-1.39126	0.892678	-6.3279	-1.84075	3.36933e-05	-2.3083	1.4177	-0.200663	-1.31702	-0.0631401	-0.99564	-1.67502	-3.70789	-2.55449
15	5	-0.722456	-3.82004	-2.53581	-9.28105	-3.53484	-3.06711	-2.48497	-1.90266	-3.98607	-2.06802	-2.33857	-0.555865	-0.953402	-0.445691	-1.99577	-4.49913	-0.0292132	-1.38549	-7.24417	-1.71646	-0.350465	-4.27264	-0.604346	-5.467	-5.75469	-5.47438	-1.09607	-0.416677	-1.90851	-1.60798	-2.15389	-0.621082	-0.135779	-1.65204	0.911409	-5.98521	-2.02593	3.10573e-05	-1.95152	0.829319	-0.491235	-1.58075	-0.320751	-0.851957	-1.67367	-3.65103	-2.70365
17	5	-0.73783	-3.75624	-2.39812	-9.79292	-4.0908	-3.68924	-2.93751	-2.408	-4.33333	-1.91951	-2.12599	-0.438132	-0.844918	-0.61567	-2.15087	-4.11788	0.358268	-1.32628	-7.26719	-1.80133	-0.526198	-3.7338	-0.653216	-5.64978	-5.33277	-6.34293	-0.973328	-0.687217	-1.98277	-1.86415	-2.47041	-1.07638	0.0147457	-1.63569	0.833602	-5.97521	-1.93563	2.79224e-05	-1.91913	0.417538	-0.789664	-1.83574	-0.446083	-0.863682	-1.57589	-4.31646	-2.72688
1	20	-0.258884	-3.33259	-2.22814	-7.55796	-4.16569	-2.68786	-2.60073	-1.29825	-4.45487	-2.06408	-1.96201	-0.221892	-0.606124	-0.00593287	-1.53775	-3.90471	0.795929	-1.13147	-7.96343	-1.96548	-0.311545	-3.34435	-0.248792	-4.56557	-4.69006	-5.18461	-0.683141	-0.305576	-0.972893	-0.94888	-1.83809	-0.545064	0.0175561	-1.06845	1.38617	-6.27703	-1.91842	3.47953e-05	-1.83003	1.35386	0.0173851	-0.785185	0.104727	-0.820993	-1.28861	-3.66071	-2.06847
4	20	-0.0582907	-3.86616	-2.43679	-8.35029	-3.7214	-3.65894	-2.85558	-1.8081	-4.41846	-1.63587	-2.17942	-0.394793	-0.703266	-0.246915	-1.86474	-4.53038	0.280198	-1.13329	-7.01529	-1.81825	-0.146546	-4.96929	-0.120191	-4.71798	-5.06938	-5.65566	-1.03294	-0.440505	-1.49467	-1.29256	-2.17401	-0.657262	-0.265726	-1.40582	1.25599	-6.59243	-2.05613	4.72646e-05	-1.9151	1.3513	-0.431805	-1.11712	0.0397532	-0.858866	-1.49847	-3.93145	-2.20054
12	20	-0.721401	-3.75551	-2.16068	-7.27367	-3.95144	-3.37733	-2.98093	-1.97175	-4.17759	-1.74226	-2.31083	-0.46408	-0.736335	-0.635467	-2.24396	-4.36798	0.378717	-1.38433	-7.67914	-1.77196	-0.387593	-4.54727	-0.879059	-5.82024	-5.66423	-5.49121	-0.915251	-0.651673	-2.00438	-1.76857	-2.39975	-0.844399	-0.110154	-1.77083	0.885752	-6.00516	-1.96485	3.85304e-05	-1.86426	0.628015	-0.854128	-1.79581	-0.347257	-0.903389	-1.49516	-4.2318	-2.8861
13	20	-0.569784	-3.87142	-1.99907	-9.50621	-3.60085	-3.22395	-2.55062	-1.76947	-4.02557	-1.64179	-2.02522	0.099474	-0.462164	-0.0845596	-1.58795	-4.35292	0.640651	-1.17583	-7.42677	-1.5529	0.00659873	-3.96104	-0.114135	-5.49888	-5.05187	-5.30152	-0.819953	-0.0849644	-1.7756	-1.2434	-2.0417	-0.472253	0.146438	-1.3106	1.20518	-6.56177	-1.67619	7.43854e-05	-1.69546	1.20109	-0.0620669	-1.06806	0.00585946	-0.642032	-1.45233	-3.71016	-2.41447
14	20	-0.450064	-3.87866	-2.34101	-8.73069	-4.21983	-3.96852	-3.17001	-1.83771	-4.6253	-2.08171	-2.45342	-0.341406	-0.722103	-0.478592	-2.12179	-4.1874	0.459855	-1.44908	-7.26435	-1.93312	-0.378293	-4.93895	-0.559656	-5.5952	-5.47259	-6.21838	-0.953456	-0.601319	-1.61863	-1.55291	-2.37343	-0.673418	-0.310522	-1.74567	1.16735	-6.39532	-2.04608	5.38488e-05	-1.97453	0.848428	-0.490657	-1.52977	-0.276934	-0.929026	-1.67165	-4.30385	-2.33654
[truncated: 8 more columns]
