# Supplementary material for: The infection-tolerant white-footed deermouse tempers interferon responses to endotoxin in comparison to the mouse and rat
Source: eLife. 2024 Jan 9;12:RP90135. doi: 10.7554/eLife.90135 (PMC10945503; doi:10.7554/eLife.90135)
Supplement: Table 4—source data 2. [file elife-90135-table4-data2.xlsx]

## Sheet: Table 5-Source Data 2
Table 4-Source Data 2. Diifferentially expressed gene analysis of RNA-seq for Rattus norvegicus
transcript_accession	gene_name	product	maximum group mean	fold-change	FDR p-value
XM_003748860.5	Saal1	serum amyloid A-like 1 (Saal1), transcript variant X1, mRNA	603.02	951.52	0
XM_039101019.1	LOC120099849	uncharacterized LOC120099849, mRNA; P21414.2; gag-pol polyprotein of leukemia viruses	52.45	131.02	0
XM_039113367.1	LOC120103612	MLV-related proviral Env polyprotein-like (LOC120103612), transcript variant X2, mRNA	141	61.56	8.6e-271
NM_130741.1	Lcn2	lipocalin 2 (Lcn2), mRNA	183.82	991.76	7.9e-210
NM_001107282.1	Acod1	aconitate decarboxylase 1 (Acod1), mRNA	97.13	945.29	5e-209
NM_139089.2	Cxcl10	C-X-C motif chemokine ligand 10 (Cxcl10), mRNA	336.77	230.88	4.2e-189
XM_006253207.3	Msr1	macrophage scavenger receptor 1 (Msr1), transcript variant X4, mRNA	87.37	117.79	1.2e-182
NM_001106862.1	Ngp	neutrophilic granule protein (Ngp), mRNA	447.12	231	7.5e-181
NM_001109421.2	Ebi3	Epstein-Barr virus induced 3 (Ebi3), mRNA	154.81	41.78	1.1e-164
NM_134350.2	Mx2	MX dynamin like GTPase 2 (Mx2), mRNA	110.85	122.82	1.4e-155
NM_001106700.1	Isg15	ISG15 ubiquitin-like modifier (Isg15), mRNA	767.24	27.8	1.2e-152
NM_001106052.1	Olfm4	olfactomedin 4 (Olfm4), mRNA	75.19	146.74	5.6e-146
XM_039093397.1	Acod1	aconitate decarboxylase 1 (Acod1), transcript variant X2, mRNA	66.33	415.73	4.9e-140
NM_012798.2	Mal	mal, T-cell differentiation protein (Mal), mRNA	76.85	-135.24	3.6e-139
NM_053299.2	Ubd	ubiquitin D (Ubd), mRNA	65.77	295.88	1.6e-116
NM_019174.3	Ca4	carbonic anhydrase 4 (Ca4), mRNA	54.32	232.48	1.2e-115
NM_212466.3	Cfb	complement factor B (Cfb), mRNA	52.57	59.8	4.3e-115
XM_039085203.1	Nos2	nitric oxide synthase 2 (Nos2), transcript variant X1, mRNA	212.22	56.93	5.5e-115
NM_012611.3	Nos2	nitric oxide synthase 2 (Nos2), mRNA	233	53.83	8.6e-114
NR_133655.1	LOC106736471	antisense transcript of iNOS gene (LOC106736471), long non-coding RNA	669.38	58.05	1e-112
XM_006228547.4	Cd177	CD177 molecule (Cd177), transcript variant X2, mRNA	37.23	133.31	8.5e-112
XM_006254048.3	Map3k8	mitogen-activated protein kinase kinase kinase 8 (Map3k8), transcript variant X1, mRNA	34.95	17.42	1e-106
NM_012675.3	Tnf	tumor necrosis factor (Tnf), mRNA	51.26	44.39	7.4e-105
XR_005490984.1	Mx2	MX dynamin like GTPase 2 (Mx2), transcript variant X3, misc_RNA	11.38	50.92	9.5e-104
NM_013059.2	Alpl	alkaline phosphatase, biomineralization associated (Alpl), mRNA	44.94	151.52	1e-99
NM_021835.3	Jun	Jun proto-oncogene, AP-1 transcription factor subunit (Jun), mRNA	35.9	15.38	1.3e-99
NM_053647.2	Cxcl2	C-X-C motif chemokine ligand 2 (Cxcl2), mRNA	58.9	963.63	3.5e-97
NM_001007712.2	Cavin2	caveolae associated protein 2 (Cavin2), mRNA	17.39	80.46	8.1e-91
XM_039100723.1	LOC120099632	uncharacterized LOC120099632 (LOC120099632), mRNA	4.3	71.71	3.5e-90
NM_001109646.1	LOC691670	similar to natural killer cell protease 7 (LOC691670), mRNA	58.05	42.3	2.7e-89
NM_013025.2	Ccl3	C-C motif chemokine ligand 3 (Ccl3), mRNA	518.66	27.55	6.7e-89
XM_039087542.1	Rnf213	ring finger protein 213 (Rnf213), transcript variant X2, mRNA	48.58	11.69	1e-88
XM_008771712.3	Inhba	inhibin subunit beta A (Inhba), transcript variant X2, mRNA	4	148.31	5.5e-85
NM_182952.2	Cxcl11	C-X-C motif chemokine ligand 11 (Cxcl11), mRNA	47.06	417.5	1.4e-82
XM_039094069.1	Gzmbl1	Granszyme B-like 1 (Gzmbl1), mRNA	29.15	79.79	1.7e-82
NM_153721.1	Ppbp	pro-platelet basic protein (Ppbp), mRNA	450.34	21.48	7.8e-82
NM_138517.3	Gzmb	granzyme B (Gzmb), mRNA	1285.28	18.45	9.2e-82
NM_001108017.1	Cmpk2	cytidine/uridine monophosphate kinase 2 (Cmpk2), mRNA	51.88	17.61	4.1e-81
XM_006241162.4	Timp3	TIMP metallopeptidase inhibitor 3 (Timp3), transcript variant X1, mRNA	20.54	21.19	5.1e-81
NM_001108569.3	Gbp5	guanylate binding protein 5 (Gbp5), mRNA	206.56	11.24	1.2e-79
XM_039109438.1	Ddx58	DEXD/H-box helicase 58 (Ddx58), transcript variant X1, mRNA	61.27	11.74	1.5e-79
NM_001100724.1	Camp	cathelicidin antimicrobial peptide (Camp), mRNA	57.16	52.98	2.3e-79
NM_001025750.1	Plek	pleckstrin (Plek), mRNA	413.35	8.19	4.3e-79
NM_001024753.1	Ifit2	interferon-induced protein with tetratricopeptide repeats 2 (Ifit2), mRNA	196.78	14.45	5.2e-78
NM_133306.2	Olr1	oxidized low density lipoprotein receptor 1 (Olr1), mRNA	41.2	15.63	8.6e-78
NM_001047858.3	Srxn1	sulfiredoxin 1 (Srxn1), mRNA	15.25	17.46	2.7e-76
NM_145879.2	Socs1	suppressor of cytokine signaling 1 (Socs1), mRNA	33.96	19.94	1.4e-75
XM_039087543.1	Rnf213	ring finger protein 213 (Rnf213), transcript variant X3, mRNA	14.66	11.93	2.3e-74
XM_039108688.1	Herc6	HECT and RLD domain containing E3 ubiquitin protein ligase family member 6 (Herc6), transcript variant X6, mRNA	16.82	28.95	5.6e-74
NM_001134730.1	Lgalsl	galectin-like (Lgalsl), mRNA	25.2	17.8	1.2e-72
NM_017051.2	Sod2	superoxide dismutase 2 (Sod2), mRNA; nuclear gene for mitochondrial product	372.36	8.32	2.6e-72
XM_039109268.1	Orm1	orosomucoid 1 (Orm1), transcript variant X1, mRNA	52.22	1266.16	6.4e-68
XM_039105644.1	Thbs1	thrombospondin 1 (Thbs1), transcript variant X1, mRNA	65.98	14.64	7.2e-68
NM_001108623.2	Parp12	poly (ADP-ribose) polymerase family, member 12 (Parp12), mRNA	43.93	6.9	1.6e-67
XR_005503612.1	Herc6	HECT and RLD domain containing E3 ubiquitin protein ligase family member 6 (Herc6), transcript variant X2, misc_RNA	11.95	15.88	3.4e-67
XR_005498306.1	LOC120099238	uncharacterized LOC120099238 (LOC120099238), ncRNA	126.77	8.75	3.9e-67
XM_017591328.2	LOC100363228	hypothetical LOC100363228 (LOC100363228), transcript variant X4, mRNA	21.42	13.32	5.9e-67
NM_177928.3	Nampt	nicotinamide phosphoribosyltransferase (Nampt), mRNA	73.39	11.27	3.1e-66
NM_001109509.1	Gpr84	G protein-coupled receptor 84 (Gpr84), mRNA	11.98	139.13	5.8e-66
NM_053802.1	Tgfbi	transforming growth factor, beta induced (Tgfbi), mRNA	47.54	-50.32	9.3e-66
NM_012795.3	Gp5	glycoprotein V (platelet) (Gp5), mRNA	81	9.26	3.4e-64
XR_005498850.1	LOC120099700	uncharacterized LOC120099700 (LOC120099700), transcript variant X6, ncRNA	30.19	10.9	8.5e-64
NM_012769.2	Gucy1b1	guanylate cyclase 1 soluble subunit beta 1 (Gucy1b1), mRNA	17.27	12.84	1e-62
NM_001105798.2	Alox12	arachidonate 12-lipoxygenase, 12S type (Alox12), mRNA	214.2	9.53	1.1e-62
XM_006233260.4	Pde5a	phosphodiesterase 5A (Pde5a), transcript variant X1, mRNA	53.13	8.49	1.7e-62
NM_031628.2	Nr4a3	nuclear receptor subfamily 4, group A, member 3 (Nr4a3), mRNA	6.24	36.33	2.7e-62
NM_133564.1	Zbp1	Z-DNA binding protein 1 (Zbp1), mRNA	120.34	9.11	2.9e-62
NM_001389250.1	Sh3bgrl2	SH3 domain binding glutamate-rich protein like 2 (Sh3bgrl2), transcript variant 1, mRNA	12.71	13.34	2.1e-61
NM_001014235.1	Phf11b	PHD finger protein 11B (Phf11b), mRNA	87.89	8.12	3.2e-61
NM_001014058.2	Usp18	ubiquitin specific peptidase 18 (Usp18), mRNA	28.9	11.64	3.3e-61
NM_001109199.1	Ifih1	interferon induced with helicase C domain 1 (Ifih1), mRNA	28.79	6.99	5.5e-61
XM_017591589.2	Ralgds	ral guanine nucleotide dissociation stimulator (Ralgds), transcript variant X4, mRNA	17.48	15.84	1.9e-60
NM_001106748.1	Batf	basic leucine zipper ATF-like transcription factor (Batf), mRNA	43.44	12.06	2.4e-60
NM_172019.2	Ifi47	interferon gamma inducible protein 47 (Ifi47), mRNA	131.28	6.4	4.7e-60
XM_575365.7	Samd9	sterile alpha motif domain containing 9 (Samd9), transcript variant X1, mRNA	122.02	8.5	8.3e-60
NM_001305181.1	N4bp1	Nedd4 binding protein 1 (N4bp1), mRNA	43.5	7.78	3.2e-59
XM_006230541.2	Irf7	interferon regulatory factor 7 (Irf7), transcript variant X2, mRNA	35.54	9.58	3.7e-59
XM_039107666.1	Usp18	ubiquitin specific peptidase 18 (Usp18), transcript variant X2, mRNA	27.55	18.28	1.1e-58
XM_006237298.4	Slc2a3	solute carrier family 2 member 3 (Slc2a3), transcript variant X3, mRNA	38.66	9	1.1e-58
XM_008762963.3	Herc6	HECT and RLD domain containing E3 ubiquitin protein ligase family member 6 (Herc6), transcript variant X1, mRNA	49.72	16.77	1.4e-58
XM_039094725.1	Ifitm6	interferon induced transmembrane protein 6 (Ifitm6), mRNA	90.09	43.28	3e-58
NM_133624.2	Gbp2	guanylate binding protein 2 (Gbp2), mRNA	395.65	10.2	3e-58
XM_006242502.4	Birc3	baculoviral IAP repeat-containing 3 (Birc3), transcript variant X4, mRNA	41.36	7.37	3.5e-58
XM_006247314.4	Dhx58	DEXH-box helicase 58 (Dhx58), transcript variant X1, mRNA	16.91	12.11	9.1e-58
XM_039094811.1	Slc7a2	solute carrier family 7 member 2 (Slc7a2), transcript variant X3, mRNA	10.47	146.07	8.7e-57
NM_031618.1	Nckap1	NCK-associated protein 1 (Nckap1), mRNA	9.16	13.71	8.9e-57
NM_001013062.2	Thbs1	thrombospondin 1 (Thbs1), mRNA	49.07	14.39	1.2e-56
XM_006237331.4	Cd4	Cd4 molecule (Cd4), transcript variant X1, mRNA	165.62	-8.76	5.2e-56
NM_001031642.1	Serpinb1a	serpin family B member 1A (Serpinb1a), mRNA	784.32	25.06	2.7e-55
NM_017019.2	Il1a	interleukin 1 alpha (Il1a), mRNA	59.4	7822.96	3.8e-55
XM_039097279.1	Gp6	glycoprotein VI (Gp6), mRNA	84.16	6.15	4e-55
NM_001106207.1	Myct1	myc target 1 (Myct1), mRNA	37.68	8.92	7.1e-55
NM_001008510.1	Isg20	interferon stimulated exonuclease gene 20 (Isg20), mRNA	62.24	11.46	9.5e-55
NM_001108740.1	Ckap4	cytoskeleton-associated protein 4 (Ckap4), mRNA	21.45	12.7	9.6e-55
NM_001007004.1	Tuba4a	tubulin, alpha 4A (Tuba4a), mRNA	275.65	9.96	1.3e-54
NM_001101009.1	Tlr8	toll-like receptor 8 (Tlr8), mRNA	32.11	-45.73	1.4e-54
NM_031818.1	Clic4	chloride intracellular channel 4 (Clic4), mRNA	80.87	6.94	1.8e-54
NM_053953.2	Il1r2	interleukin 1 receptor type 2 (Il1r2), mRNA	119.45	19.11	2.4e-54
XM_039087215.1	Irgm2	immunity-related GTPase family M member 2 (Irgm2), transcript variant X1, mRNA	66.63	5.78	3.2e-54
NM_001173426.1	Rbpms2	RNA binding protein, mRNA processing factor 2 (Rbpms2), mRNA	13.37	27.74	6.7e-54
NM_012582.2	Hp	haptoglobin (Hp), mRNA	315.88	22.22	8.9e-54
NM_022194.2	Il1rn	interleukin 1 receptor antagonist (Il1rn), mRNA	271.41	7.09	1.7e-52
XM_039108686.1	Herc6	HECT and RLD domain containing E3 ubiquitin protein ligase family member 6 (Herc6), transcript variant X3, mRNA	13.2	15.24	1.7e-52
XM_039093396.1	Acod1	aconitate decarboxylase 1 (Acod1), transcript variant X1, mRNA	18.78	2477.21	2.4e-52
XM_017597041.2	Slc6a4	solute carrier family 6 member 4 (Slc6a4), transcript variant X1, mRNA	15.68	10.87	3.4e-52
NM_016994.2	C3	complement C3 (C3), mRNA	103.12	9.25	7.9e-52
XM_039106739.1	Tubb1	tubulin, beta 1 class VI (Tubb1), transcript variant X2, mRNA	154.27	7.75	9.2e-52
XM_017595697.2	Ccrl2	C-C motif chemokine receptor like 2 (Ccrl2), transcript variant X1, mRNA	13.24	39.13	1.1e-51
XM_006235642.4	Znfx1	zinc finger, NFX1-type containing 1 (Znfx1), transcript variant X1, mRNA	7.38	10.87	1.1e-51
XM_578575.8	Vash1	vasohibin 1 (Vash1), mRNA	12.94	10.11	1.5e-51
NM_053559.1	Trpc6	transient receptor potential cation channel, subfamily C, member 6 (Trpc6), mRNA	15.1	8.85	2.5e-51
XM_039104940.1	Rpap1	RNA polymerase II associated protein 1 (Rpap1), transcript variant X4, mRNA	34.47	6.92	1.5e-50
NM_001031825.1	Gp9	glycoprotein IX (platelet) (Gp9), mRNA	149.17	7.68	1.8e-50
XM_006256923.4	Rps6ka3	ribosomal protein S6 kinase A3 (Rps6ka3), transcript variant X9, mRNA	3.08	100.7	8.4e-50
NM_001077640.2	Gadd45g	growth arrest and DNA-damage-inducible, gamma (Gadd45g), mRNA	27.67	21.64	1.5e-49
NM_001008349.1	Nfkb2	nuclear factor kappa B subunit 2 (Nfkb2), mRNA	40.29	8.18	1.8e-49
XM_039100074.1	Tlr8	toll-like receptor 8 (Tlr8), transcript variant X1, mRNA	16.45	-61.46	8.1e-49
NM_001191659.1	Parp14	poly (ADP-ribose) polymerase family, member 14 (Parp14), mRNA	67.22	4.66	1.5e-48
NM_001012345.1	Dgat2	diacylglycerol O-acyltransferase 2 (Dgat2), mRNA	77.63	21.32	1.8e-48
NM_001389271.1	Znfx1	zinc finger, NFX1-type containing 1 (Znfx1), mRNA	21.13	4.96	2.7e-48
NM_019335.2	Eif2ak2	eukaryotic translation initiation factor 2-alpha kinase 2 (Eif2ak2), mRNA	54.53	5.6	5.1e-48
XM_006242448.4	Gpr84	G protein-coupled receptor 84 (Gpr84), transcript variant X1, mRNA	8.34	138.81	6.2e-48
NM_031804.1	Cish	cytokine inducible SH2-containing protein (Cish), mRNA	39.45	9.09	6.8e-48
XM_039090980.1	LOC498276	Fc gamma receptor II beta (LOC498276), transcript variant X4, mRNA	29.7	10.32	6.8e-48
XM_039079611.1	Parvb	parvin, beta (Parvb), transcript variant X2, mRNA	81.66	6.62	1.8e-47
XM_006253216.4	Ppp1r3b	protein phosphatase 1, regulatory subunit 3B (Ppp1r3b), transcript variant X2, mRNA	16.83	8.18	2.8e-47
XM_006251340.4	Gas2l1	growth arrest-specific 2 like 1 (Gas2l1), transcript variant X1, mRNA	63.13	9.37	3e-47
NM_053431.3	Qsox1	quiescin sulfhydryl oxidase 1 (Qsox1), transcript variant 2, mRNA	13.99	18.77	7.7e-47
NM_017034.1	Pim1	Pim-1 proto-oncogene, serine/threonine kinase (Pim1), mRNA	61.69	6.65	9.4e-47
NM_144752.2	Oas1b	2-5 oligoadenylate synthetase 1B (Oas1b), mRNA	19.27	9.96	1e-46
XM_006239908.4	Odc1	ornithine decarboxylase 1 (Odc1), transcript variant X3, mRNA	28.43	6.44	1e-46
NM_053796.1	F11r	F11 receptor (F11r), mRNA	49.85	5.51	1.1e-46
NM_001100749.1	Mxd1	max dimerization protein 1 (Mxd1), mRNA	167.66	5.9	1.1e-46
XM_006249382.4	Oas1a	2'-5' oligoadenylate synthetase 1A (Oas1a), transcript variant X1, mRNA	24.41	9.77	1.2e-46
XM_006236596.4	Mmrn1	multimerin 1 (Mmrn1), transcript variant X3, mRNA	36.99	13.05	1.6e-46
NM_134361.1	Xcl1	X-C motif chemokine ligand 1 (Xcl1), mRNA	156.71	16.26	2.9e-46
XM_006230540.2	Irf7	interferon regulatory factor 7 (Irf7), transcript variant X1, mRNA	188.62	6.41	4.3e-46
NM_001013118.1	Abi3	ABI family, member 3 (Abi3), mRNA	48.08	-10.6	4.3e-46
NM_001106483.2	Gca	grancalcin (Gca), mRNA	20.58	7.89	5.5e-46
NM_130399.2	Ada	adenosine deaminase (Ada), mRNA	28.58	7.07	6e-46
NM_001136124.2	Ifitm3	interferon induced transmembrane protein 3 (Ifitm3), mRNA	25.69	81.24	9.3e-46
NM_021698.2	F13a1	coagulation factor XIII A1 chain (F13a1), mRNA	207.88	5.33	1.7e-45
XM_039098827.1	Tnfaip3	TNF alpha induced protein 3 (Tnfaip3), transcript variant X3, mRNA	49.12	8.25	2.6e-45
NM_001107089.2	Muc20	mucin 20, cell surface associated (Muc20), mRNA	134.18	6.88	3.3e-45
XM_345572.10	Mpl	MPL proto-oncogene, thrombopoietin receptor (Mpl), transcript variant X4, mRNA	30.83	5.9	5.3e-45
NM_001011905.1	Stat2	signal transducer and activator of transcription 2 (Stat2), mRNA	57.64	5.01	7.7e-45
XM_039108689.1	Herc6	HECT and RLD domain containing E3 ubiquitin protein ligase family member 6 (Herc6), transcript variant X7, mRNA	45.78	14.12	9.5e-45
XM_039084059.1	Treml1	triggering receptor expressed on myeloid cells-like 1 (Treml1), transcript variant X1, mRNA	150.47	6.81	1.3e-44
XR_005501157.1	LOC103691647	uncharacterized LOC103691647 (LOC103691647), transcript variant X3, ncRNA	35.01	13.12	1.5e-44
NM_001192001.1	Treml1	triggering receptor expressed on myeloid cells-like 1 (Treml1), mRNA	162.63	6.43	1.9e-44
NM_021868.2	Cttn	cortactin (Cttn), mRNA	23.19	6.32	1.9e-44
XM_003749638.5	Tubb1	tubulin, beta 1 class VI (Tubb1), transcript variant X1, mRNA	123.73	8.12	4.6e-44
XM_039090783.1	F5	coagulation factor V (F5), transcript variant X1, mRNA	97.73	6.51	5.1e-44
XM_006231248.3	Cd274	CD274 molecule (Cd274), transcript variant X1, mRNA	40.71	6.26	7.4e-44
XM_006243741.3	Uba7	ubiquitin-like modifier activating enzyme 7 (Uba7), transcript variant X2, mRNA	11.21	9.67	9.5e-44
NM_133584.1	Pde5a	phosphodiesterase 5A (Pde5a), mRNA	18.99	7.25	9.9e-44
XM_039092216.1	Gas2l1	growth arrest-specific 2 like 1 (Gas2l1), transcript variant X2, mRNA	14.81	8.36	1e-43
NM_173339.2	Ceacam4	CEA cell adhesion molecule 4 (Ceacam4), mRNA	129.77	9.94	1.5e-43
XM_006243574.3	Pls1	plastin 1 (Pls1), transcript variant X1, mRNA	20.01	7.27	2.1e-43
NM_053858.1	Ccl4	C-C motif chemokine ligand 4 (Ccl4), mRNA	230	16.07	2.8e-43
XM_008767950.3	Slc6a4	solute carrier family 6 member 4 (Slc6a4), transcript variant X2, mRNA	14.12	10.54	4.1e-43
NM_012904.2	Anxa1	annexin A1 (Anxa1), mRNA	306.08	7.39	5.1e-43
NM_001008826.3	RT1-T24-4	RT1 class I, locus T24, gene 4 (RT1-T24-4), mRNA	285.59	6.04	6.3e-43
XM_039101533.1	Dgat2	diacylglycerol O-acyltransferase 2 (Dgat2), transcript variant X2, mRNA	31.44	17.45	8.4e-43
XM_008765729.2	Plxnb2	plexin B2 (Plxnb2), transcript variant X4, mRNA	7.26	-313.27	8.4e-43
NM_053930.4	Gp1bb	glycoprotein Ib platelet subunit beta (Gp1bb), mRNA	307.36	6.04	2.2e-42
XM_039095255.1	LOC120097562	probable ATP-dependent RNA helicase DDX60 (LOC120097562), mRNA	10.77	6.88	2.4e-42
XM_225905.8	RGD1305184	similar to CDNA sequence BC023105 (RGD1305184), mRNA	1.55	68.12	3.8e-42
NM_053931.4	Septin5	septin 5 (Septin5), mRNA	35.14	5.55	5.3e-42
NM_012997.3	P2rx1	purinergic receptor P2X 1 (P2rx1), transcript variant 1, mRNA	26.52	6.54	6.4e-42
NM_153720.2	Itgb3	integrin subunit beta 3 (Itgb3), mRNA	356.36	5.31	7.9e-42
XM_039107133.1	Cald1	caldesmon 1 (Cald1), transcript variant X6, mRNA	8.07	23.74	9.3e-42
NM_024127.2	Gadd45a	growth arrest and DNA-damage-inducible, alpha (Gadd45a), mRNA	102.87	5.91	1.1e-41
XM_039110691.1	Nr4a3	nuclear receptor subfamily 4, group A, member 3 (Nr4a3), transcript variant X1, mRNA	7.24	26.52	1.5e-41
XM_039107889.1	Clec4a3	C-type lectin domain family 4, member A3 (Clec4a3), transcript variant X1, mRNA	94.93	-24.71	1.8e-41
NM_053610.1	Prdx5	peroxiredoxin 5 (Prdx5), mRNA; nuclear gene for mitochondrial product	97.66	11.24	2.3e-41
XM_001065477.6	LOC102556681	uncharacterized LOC102556681 (LOC102556681), transcript variant X1, mRNA	18.71	5.93	2.6e-41
NM_017043.4	Ptgs1	prostaglandin-endoperoxide synthase 1 (Ptgs1), mRNA	46.1	5.49	3.8e-41
XR_361263.3	LOC498829	Ab2-143 (LOC498829), misc_RNA	48.48	8.41	4.9e-41
XM_008764147.2	Rnf19b	ring finger protein 19B (Rnf19b), transcript variant X1, mRNA	64.68	5.01	4.9e-41
NM_001134686.2	Slc7a2	solute carrier family 7 member 2 (Slc7a2), transcript variant 2, mRNA	9.25	1196.23	5e-41
NM_031622.2	Mapk6	mitogen-activated protein kinase 6 (Mapk6), mRNA	21.07	4.61	7.5e-41
NM_001109422.1	Bcl3	BCL3, transcription coactivator (Bcl3), mRNA	73.08	8.1	7.8e-41
XM_006251236.4	Limk2	LIM domain kinase 2 (Limk2), transcript variant X6, mRNA	9.16	10.05	8.4e-41
XM_006229917.4	Trim30	tripartite motif-containing 30 (Trim30), transcript variant X1, mRNA	25.42	4.75	1e-40
NM_181476.1	Hcar2	hydroxycarboxylic acid receptor 2 (Hcar2), mRNA	70.72	8.35	1.3e-40
NM_133315.2	Slc40a1	solute carrier family 40 member 1 (Slc40a1), mRNA	49.63	5.37	2.3e-40
XM_017599603.2	Gzmf	granzyme F (Gzmf), transcript variant X1, mRNA	6.44	23.22	2.3e-40
XM_006251483.3	Upp1	uridine phosphorylase 1 (Upp1), transcript variant X1, mRNA	45.92	11.55	2.6e-40
XM_039105130.1	Stk4	serine/threonine kinase 4 (Stk4), transcript variant X2, mRNA	10.22	11.34	2.9e-40
XM_008767035.3	Nck2	NCK adaptor protein 2 (Nck2), transcript variant X1, mRNA	27.78	5.02	3.5e-40
NM_001107248.1	Vcl	vinculin (Vcl), mRNA	19.78	8.22	3.9e-40
NM_001126288.1	Pld4	phospholipase D family, member 4 (Pld4), mRNA	46.25	-20.23	5.3e-40
NM_022298.1	Tuba1a	tubulin, alpha 1A (Tuba1a), mRNA	139.44	5.5	7.3e-40
XM_039092858.1	Abca13	ATP binding cassette subfamily A member 13 (Abca13), mRNA	0.51	109.82	8.3e-40
XM_006246829.4	Gas7	growth arrest specific 7 (Gas7), transcript variant X4, mRNA	24.81	8.34	1.4e-39
XM_017595137.2	Socs2	suppressor of cytokine signaling 2 (Socs2), transcript variant X5, mRNA	16.77	8.85	1.4e-39
NM_053889.1	Vwf	von Willebrand factor (Vwf), mRNA	25.06	5.54	1.4e-39
NM_022267.2	Ccnd2	cyclin D2 (Ccnd2), mRNA	107.28	6.61	5.4e-39
NM_001271059.1	Mx1	myxovirus (influenza virus) resistance 1 (Mx1), transcript variant 3, mRNA	9.91	9.14	7.7e-39
XM_039098437.1	Tapbp	TAP binding protein (Tapbp), transcript variant X1, mRNA	29.55	4.65	1.4e-38
NM_053505.2	Slc24a3	solute carrier family 24 member 3 (Slc24a3), mRNA	17.66	4.94	1.5e-38
XR_005487764.1	Dnaja4	DnaJ heat shock protein family (Hsp40) member A4 (Dnaja4), transcript variant X2, misc_RNA	15.77	5.55	1.6e-38
NM_001030020.1	Prkar2b	protein kinase cAMP-dependent type II regulatory subunit beta (Prkar2b), mRNA	32.74	5.94	2e-38
NM_053713.1	Klf4	Kruppel like factor 4 (Klf4), mRNA	32.87	-17.98	2.6e-38
NM_001305276.1	Helz2	helicase with zinc finger 2 (Helz2), mRNA	29.32	4.27	4.9e-38
NM_001109119.1	Tubb2a	tubulin, beta 2A class IIa (Tubb2a), mRNA	137.72	5.8	1e-37
NM_001005539.1	Smpdl3a	sphingomyelin phosphodiesterase, acid-like 3A (Smpdl3a), mRNA	99.78	-6.75	4.1e-37
NM_001271239.1	Tmem117	transmembrane protein 117 (Tmem117), mRNA	14.58	6.75	4.2e-37
NM_001008765.1	Igtp	interferon gamma induced GTPase (Igtp), mRNA	36.02	4.41	6.1e-37
XM_001071128.7	Mmrn1	multimerin 1 (Mmrn1), transcript variant X1, mRNA	46.36	6.07	7.9e-37
NM_001109654.1	Gp1ba	glycoprotein Ib platelet subunit alpha (Gp1ba), mRNA	247.3	6.97	8.3e-37
NM_017303.2	Kcnab1	potassium voltage-gated channel subfamily A member regulatory beta subunit 1 (Kcnab1), mRNA	42.58	4.85	8.4e-37
XM_017592194.2	Inafm2	InaF motif containing 2 (Inafm2), mRNA	72.11	4.72	9.2e-37
XM_006256069.4	Mpig6b	megakaryocyte and platelet inhibitory receptor G6b (Mpig6b), transcript variant X1, mRNA	159.29	4.95	1.2e-36
NM_001302083.1	Odc1	ornithine decarboxylase 1 (Odc1), transcript variant 2, mRNA	19.58	6.02	1.3e-36
XM_039107665.1	Usp18	ubiquitin specific peptidase 18 (Usp18), transcript variant X1, mRNA	17.36	72.12	1.4e-36
XM_039093891.1	LOC120093070	PHD finger protein 11-like (LOC120093070), transcript variant X3, mRNA	31.06	6.8	1.6e-36
NM_172335.2	Gm2a	GM2 ganglioside activator (Gm2a), mRNA	458.22	-7.01	2e-36
NM_013096.2	Hba-a1	hemoglobin alpha, adult chain 1 (Hba-a1), mRNA	653623	8.48	2.3e-36
XM_006245283.1	Dnajb2	DnaJ heat shock protein family (Hsp40) member B2 (Dnajb2), transcript variant X8, mRNA	53.56	7.5	3.3e-36
NM_022605.1	Hpse	heparanase (Hpse), mRNA	48.72	4.55	3.4e-36
XM_006249974.4	Rgs1	regulator of G-protein signaling 1 (Rgs1), transcript variant X1, mRNA	66.15	9.92	3.4e-36
NM_057194.1	Plscr1	phospholipid scramblase 1 (Plscr1), mRNA	6.99	56.34	4.7e-36
XM_006256066.4	Ly6g6f	lymphocyte antigen 6 family member G6F (Ly6g6f), transcript variant X1, mRNA	74.27	5.37	4.9e-36
XM_006236079.4	Samd9	sterile alpha motif domain containing 9 (Samd9), transcript variant X2, mRNA	7.42	9.74	4.9e-36
NM_012600.2	Me1	malic enzyme 1, NADP(+)-dependent, cytosolic (Me1), mRNA	22.75	5.27	7.1e-36
NM_053760.2	Trafd1	TRAF type zinc finger domain containing 1 (Trafd1), mRNA	68.37	4.79	1.1e-35
XM_006251520.1	Plek	pleckstrin (Plek), transcript variant X1, mRNA	72.66	8.11	1.2e-35
NM_031512.2	Il1b	interleukin 1 beta (Il1b), mRNA	343.47	6.95	1.3e-35
NM_001024345.2	Tpm2	tropomyosin 2 (Tpm2), transcript variant Tpm2.1, mRNA	13.2	23.9	1.7e-35
XM_017590343.2	Ifit1bl	interferon-induced protein with tetratricopeptide repeats 1B-like (Ifit1bl), transcript variant X2, mRNA	208.22	5.23	1.8e-35
NM_001007722.2	Hba-a2	hemoglobin alpha, adult chain 2 (Hba-a2), mRNA	252396	8.06	2e-35
XM_001063315.7	Itga2b	integrin subunit alpha 2b (Itga2b), mRNA	272.91	5.35	2.2e-35
XM_006250609.4	Gbp6	guanylate binding protein family member 6 (Gbp6), mRNA	63.43	4.27	2.3e-35
XM_008772866.3	Gnaz	G protein subunit alpha z (Gnaz), transcript variant X1, mRNA	13.41	8.62	2.7e-35
XM_006231510.4	Neurl1	neuralized E3 ubiquitin protein ligase 1 (Neurl1), transcript variant X3, mRNA	3.71	20.56	3.1e-35
XM_017601914.2	Plp1	proteolipid protein 1 (Plp1), transcript variant X2, mRNA	26.03	4.76	3.6e-35
XR_005492317.1	LOC120096189	uncharacterized LOC120096189 (LOC120096189), ncRNA	17.75	5.69	3.9e-35
XM_006236552.4	Nt5c3a	5'-nucleotidase, cytosolic IIIA (Nt5c3a), transcript variant X1, mRNA	34.58	5.18	3.9e-35
NM_001048047.1	Reep2	receptor accessory protein 2 (Reep2), mRNA	41.42	5.72	4.6e-35
XM_006256153.3	Rab44	RAB44, member RAS oncogene family (Rab44), transcript variant X1, mRNA	6.4	22.23	4.8e-35
XM_008772867.3	Gnaz	G protein subunit alpha z (Gnaz), transcript variant X2, mRNA	4.47	19.37	4.9e-35
XM_006236613.4	Il12rb2	interleukin 12 receptor subunit beta 2 (Il12rb2), transcript variant X1, mRNA	62.59	6.61	5e-35
XM_006246855.3	Xaf1	XIAP associated factor 1 (Xaf1), mRNA	59.75	4.8	7.9e-35
XM_039090751.1	Ralgps2	Ral GEF with PH domain and SH3 binding motif 2 (Ralgps2), transcript variant X1, mRNA	21.37	-5.73	8.2e-35
XM_039085845.1	Mgrn1	mahogunin ring finger 1 (Mgrn1), transcript variant X10, mRNA	29.9	4.5	9.9e-35
XM_039099025.1	Lims1	LIM zinc finger domain containing 1 (Lims1), transcript variant X7, mRNA	41.59	7.53	1.2e-34
XM_008759729.3	Irag1	inositol 1,4,5-triphosphate receptor associated 1 (Irag1), transcript variant X1, mRNA	8.58	9	1.2e-34
XM_017594030.1	Odc1	ornithine decarboxylase 1 (Odc1), transcript variant X1, mRNA	25.85	5.71	1.2e-34
XM_039088055.1	Mx2	MX dynamin like GTPase 2 (Mx2), transcript variant X2, mRNA	25.98	6.62	1.8e-34
XM_039093846.1	LOC102553861	granzyme-like protein 1-like (LOC102553861), mRNA	21.03	16.68	3.1e-34
NM_001025638.3	Stx11	syntaxin 11 (Stx11), mRNA	69.4	4.11	3.6e-34
XM_008760414.2	Pik3ap1	phosphoinositide-3-kinase adaptor protein 1 (Pik3ap1), transcript variant X3, mRNA	32.78	4.27	4.1e-34
XM_213790.11	Tesc	tescalcin (Tesc), transcript variant X3, mRNA	24.05	9.75	5e-34
NM_001107352.1	Hist1h2bq	histone cluster 1 H2B family member Q (Hist1h2bq), mRNA	295.29	4.29	5.1e-34
NM_001007694.2	Ifit3	interferon-induced protein with tetratricopeptide repeats 3 (Ifit3), mRNA	332.54	4.97	5.6e-34
XM_008763422.3	Pde3a	phosphodiesterase 3A (Pde3a), transcript variant X2, mRNA	6.91	5.68	7.3e-34
XM_039112917.1	Rsad2	radical S-adenosyl methionine domain containing 2 (Rsad2), transcript variant X1, mRNA	16.4	20.44	8.3e-34
NM_153468.1	Gzma	granzyme A (Gzma), mRNA	543.65	6.11	1.1e-33
NM_012591.2	Irf1	interferon regulatory factor 1 (Irf1), mRNA	91.58	4.01	1.1e-33
NM_031659.1	Tgm1	transglutaminase 1 (Tgm1), mRNA	39.06	34.91	1.2e-33
NM_001109425.2	Zfp703	zinc finger protein 703 (Zfp703), mRNA	19.46	-18.6	1.3e-33
NM_024139.2	Chp1	calcineurin-like EF-hand protein 1 (Chp1), mRNA	69.89	4.18	2.2e-33
NM_001013170.2	Wars1	tryptophanyl-tRNA synthetase 1 (Wars1), mRNA	19.98	5.67	2.4e-33
XR_005503613.1	Herc6	HECT and RLD domain containing E3 ubiquitin protein ligase family member 6 (Herc6), transcript variant X4, misc_RNA	7.19	16.78	2.5e-33
XM_039109980.1	Tln1	talin 1 (Tln1), transcript variant X2, mRNA	10.37	16.21	2.5e-33
XM_006252094.4	Clu	clusterin (Clu), transcript variant X1, mRNA	201.59	4.28	2.8e-33
NM_012615.3	Odc1	ornithine decarboxylase 1 (Odc1), transcript variant 1, mRNA	21.67	5.58	3.3e-33
NM_001170481.1	Pi16	peptidase inhibitor 16 (Pi16), mRNA	14.07	-161.65	3.3e-33
XM_039081324.1	Vwa5a	von Willebrand factor A domain containing 5A (Vwa5a), transcript variant X3, mRNA	12.81	6.6	4.1e-33
NM_001271090.2	Marcks	myristoylated alanine rich protein kinase C substrate (Marcks), mRNA	44.41	5.67	5.3e-33
NM_057188.2	Gmpr	guanosine monophosphate reductase (Gmpr), mRNA	42.07	4.99	5.4e-33
XM_006255917.4	RT1-S3	RT1 class Ib, locus S3 (RT1-S3), transcript variant X1, mRNA	44.14	5.99	1e-32
XM_039104291.1	Bcl2l1	Bcl2-like 1 (Bcl2l1), transcript variant X7, mRNA	17.04	13.03	1.7e-32
NM_001305261.1	Gbp4	guanylate binding protein 4 (Gbp4), mRNA	15.71	5.53	2e-32
NM_053519.1	Sorl1	sortilin related receptor 1 (Sorl1), mRNA	46.83	-5.63	2.1e-32
XM_006246415.4	LOC102555634	interferon-inducible GTPase 1-like (LOC102555634), mRNA	16.14	4.68	2.1e-32
NM_022268.1	Pygl	glycogen phosphorylase L (Pygl), mRNA	62.33	5.83	2.2e-32
XM_039111464.1	Cxcl17	C-X-C motif chemokine ligand 17 (Cxcl17), transcript variant X1, mRNA	9.87	29.36	2.2e-32
XM_039104658.1	Ptprj	protein tyrosine phosphatase, receptor type, J (Ptprj), transcript variant X6, mRNA	27.44	5.25	2.3e-32
NM_001077671.1	Zc3h12a	zinc finger CCCH type containing 12A (Zc3h12a), mRNA	46.16	5.5	2.6e-32
NM_138881.2	Rsad2	radical S-adenosyl methionine domain containing 2 (Rsad2), mRNA	264.71	9.06	2.6e-32
NM_178102.2	Mapkapk2	MAPK activated protein kinase 2 (Mapkapk2), mRNA	68.03	4.57	4.6e-32
XM_006247567.4	Kcnj2	potassium inwardly-rectifying channel, subfamily J, member 2 (Kcnj2), transcript variant X1, mRNA	12.56	8.16	7.1e-32
NM_012678.2	Tpm4	tropomyosin 4 (Tpm4), mRNA	607.53	4.37	8.6e-32
XM_006253206.4	Msr1	macrophage scavenger receptor 1 (Msr1), transcript variant X2, mRNA	2.45	30.98	1e-31
XM_006247315.4	Dhx58	DEXH-box helicase 58 (Dhx58), transcript variant X2, mRNA	8.43	12.28	1.1e-31
NM_001009681.1	Oasl	2'-5'-oligoadenylate synthetase-like (Oasl), mRNA	55.35	5.07	1.1e-31
XR_005492633.1	LOC103693683	low affinity immunoglobulin gamma Fc region receptor III (LOC103693683), misc_RNA	180.96	5.67	1.3e-31
NM_001025721.1	Colec12	collectin sub-family member 12 (Colec12), mRNA	9.77	-55.79	1.3e-31
XM_006239757.4	Rasgrp3	RAS guanyl releasing protein 3 (Rasgrp3), transcript variant X3, mRNA	21.31	5.4	1.3e-31
XR_005491653.1	Oas2	2'-5' oligoadenylate synthetase 2 (Oas2), transcript variant X1, misc_RNA	17.8	4.26	1.5e-31
XM_039081856.1	Arhgef12	Rho guanine nucleotide exchange factor 12 (Arhgef12), transcript variant X1, mRNA	7.8	4.88	1.9e-31
NM_012735.2	Hk2	hexokinase 2 (Hk2), mRNA	16.37	5.15	2e-31
NM_212505.2	Ier3	immediate early response 3 (Ier3), mRNA	13	21.21	2.3e-31
XR_005494235.1	LOC120097063	uncharacterized LOC120097063 (LOC120097063), transcript variant X2, ncRNA	3.04	713.61	3.3e-31
NM_001271284.1	Mff	mitochondrial fission factor (Mff), transcript variant 1, mRNA; nuclear gene for mitochondrial product	4.93	247.93	5.2e-31
NM_001025737.1	Smpdl3b	sphingomyelin phosphodiesterase, acid-like 3B (Smpdl3b), mRNA	37.74	4.41	5.9e-31
XR_005503326.1	LOC287992	hypothetical LOC287992 (LOC287992), misc_RNA	20.05	6.35	6.4e-31
NM_153466.2	Gzmf	granzyme F (Gzmf), mRNA	9.91	83.09	7.2e-31
NM_022500.4	Ftl1	ferritin light chain 1 (Ftl1), mRNA	5254.72	6.31	7.3e-31
XR_005493108.1	LOC102554737	guanylate-binding protein 6-like (LOC102554737), misc_RNA	30.41	4.24	8.4e-31
XM_006232565.4	S100a8	S100 calcium binding protein A8 (S100a8), transcript variant X1, mRNA	817.46	8.54	1.3e-30
XM_006234040.3	Gsn	gelsolin (Gsn), transcript variant X2, mRNA	70.47	4.79	1.7e-30
NM_033098.2	Tapbp	TAP binding protein (Tapbp), mRNA	43.11	5.1	1.9e-30
XM_039083174.1	Trem1	triggering receptor expressed on myeloid cells 1 (Trem1), transcript variant X1, mRNA	70.4	5.56	2e-30
NM_017365.2	Pdlim1	PDZ and LIM domain 1 (Pdlim1), mRNA	206.08	3.69	2.6e-30
NM_022396.2	Gng11	G protein subunit gamma 11 (Gng11), mRNA	28.44	4.73	2.6e-30
XM_039092540.1	Gda	guanine deaminase (Gda), transcript variant X1, mRNA	81.92	4.28	3.1e-30
XM_039103863.1	LOC685067	similar to guanylate binding protein family, member 6 (LOC685067), transcript variant X1, mRNA	52.75	4.29	3.3e-30
NM_001107491.1	Cxcl17	C-X-C motif chemokine ligand 17 (Cxcl17), mRNA	13.87	23.52	3.3e-30
NM_017330.2	Prf1	perforin 1 (Prf1), mRNA	551.38	5.1	3.4e-30
NM_001033852.1	Slc44a1	solute carrier family 44 member 1 (Slc44a1), transcript variant 1, mRNA	9.97	5.63	3.8e-30
NM_053372.2	Slpi	secretory leukocyte peptidase inhibitor (Slpi), mRNA	339.88	8.27	4.3e-30
NM_001034071.1	Tpm1	tropomyosin 1 (Tpm1), transcript variant Tpm1.3, mRNA	6.24	284.87	5.1e-30
NM_001011965.1	Stom	stomatin (Stom), mRNA	433.52	3.82	5.6e-30
NM_198776.2	Hbb-b1	hemoglobin, beta adult major chain (Hbb-b1), mRNA	7353.87	8.6	6.7e-30
NM_031614.3	Txnrd1	thioredoxin reductase 1 (Txnrd1), transcript variant 1, mRNA	34.19	5.16	8e-30
NM_001109053.1	Dtx3l	deltex E3 ubiquitin ligase 3L (Dtx3l), mRNA	23.74	3.75	8.1e-30
XM_006235402.4	Myl9	myosin light chain 9 (Myl9), transcript variant X1, mRNA	84.72	4.16	8.2e-30
NM_001009709.1	Tmem140	transmembrane protein 140 (Tmem140), mRNA	29.73	4.32	9.1e-30
NM_001271086.1	Spn	sialophorin (Spn), mRNA	133.86	-4.66	9.5e-30
XM_006248282.4	Retnlg	resistin-like gamma (Retnlg), transcript variant X1, mRNA	33.26	10.27	1e-29
NM_001100885.2	Myl9	myosin light chain 9 (Myl9), mRNA	888.56	4.05	1.4e-29
XM_006233496.3	Ifi44	interferon-induced protein 44 (Ifi44), transcript variant X2, mRNA	45.4	6.26	1.5e-29
XM_039097126.1	Reep2	receptor accessory protein 2 (Reep2), transcript variant X3, mRNA	16.12	6.5	1.8e-29
XM_039099443.1	Slc38a5	solute carrier family 38, member 5 (Slc38a5), transcript variant X2, mRNA	22.69	8.39	1.8e-29
NM_033234.1	Hbb	hemoglobin subunit beta (Hbb), mRNA	93812.7	9.04	1.9e-29
XM_008773788.3	Rnase6	ribonuclease A family member k6 (Rnase6), transcript variant X1, mRNA	37.75	-9.37	1.9e-29
XM_039082400.1	Pml	PML nuclear body scaffold (Pml), transcript variant X2, mRNA	21.31	3.71	2e-29
NM_001047084.1	Rgs18	regulator of G-protein signaling 18 (Rgs18), mRNA	243.6	4.24	2.1e-29
NM_153308.4	Grina	glutamate ionotropic receptor NMDA type subunit associated protein 1 (Grina), mRNA	178.6	4.83	2.1e-29
XM_039088369.1	Nfkbiz	NFKB inhibitor zeta (Nfkbiz), transcript variant X1, mRNA	41.07	7.1	2.1e-29
XM_006248521.4	Rtp4	receptor (chemosensory) transporter protein 4 (Rtp4), transcript variant X1, mRNA	45.71	4.2	3.6e-29
NM_001011995.1	Tuba1c	tubulin, alpha 1C (Tuba1c), mRNA	128.7	4.63	4e-29
XM_039087355.1	Slfn1	schlafen family member 1 (Slfn1), mRNA	104.8	3.76	4.1e-29
NM_001044279.1	Liph	lipase H (Liph), mRNA	10.36	5.99	4.7e-29
XM_017596349.2	Mfsd6	major facilitator superfamily domain containing 6 (Mfsd6), transcript variant X1, mRNA	21.16	5.6	5.5e-29
XM_006233495.3	Ifi44	interferon-induced protein 44 (Ifi44), transcript variant X1, mRNA	21.83	6.25	5.9e-29
NM_001168284.1	Cd300c2	CD300C molecule 2 (Cd300c2), mRNA	27.05	-75.18	5.9e-29
XM_039097426.1	Bco1	beta-carotene oxygenase 1 (Bco1), transcript variant X1, mRNA	10.46	9.01	6.9e-29
XM_039084548.1	Il18rap	interleukin 18 receptor accessory protein (Il18rap), transcript variant X3, mRNA	24.6	5.09	7.3e-29
NM_001004086.1	Pon3	paraoxonase 3 (Pon3), mRNA	16.64	-57.34	8.1e-29
NM_021587.1	Ltbp1	latent transforming growth factor beta binding protein 1 (Ltbp1), mRNA	2.86	9.32	9.6e-29
XM_039107456.1	Dusp16	dual specificity phosphatase 16 (Dusp16), transcript variant X2, mRNA	6.65	10.68	1e-28
NM_001033666.1	Dstn	destrin, actin depolymerizing factor (Dstn), mRNA	149.43	3.79	1.2e-28
NM_001034007.1	Ncoa4	nuclear receptor coactivator 4 (Ncoa4), transcript variant 1, mRNA	51.31	9.86	1.5e-28
XM_213490.10	Prr29	proline rich 29 (Prr29), mRNA	14.77	-4.63	1.5e-28
XM_006238749.4	Mpl	MPL proto-oncogene, thrombopoietin receptor (Mpl), transcript variant X8, mRNA	8.48	10.11	1.6e-28
XM_006239907.4	Odc1	ornithine decarboxylase 1 (Odc1), transcript variant X2, mRNA	30.77	5.73	1.7e-28
XM_039103038.1	Ddah1	dimethylarginine dimethylaminohydrolase 1 (Ddah1), transcript variant X2, mRNA	8.02	8.78	2.1e-28
NM_181626.3	Isca1	iron-sulfur cluster assembly 1 (Isca1), mRNA; nuclear gene for mitochondrial product	97.32	5.61	2.2e-28
XM_006239761.4	Rasgrp3	RAS guanyl releasing protein 3 (Rasgrp3), transcript variant X7, mRNA	12.38	4.8	2.5e-28
XM_039079907.1	Myl6	myosin light chain 6 (Myl6), transcript variant X5, mRNA	60.85	6.62	2.6e-28
XM_017591705.2	Itga4	integrin subunit alpha 4 (Itga4), transcript variant X1, mRNA	43.22	-4.22	2.7e-28
NM_032055.4	Tap1	transporter 1, ATP binding cassette subfamily B member (Tap1), mRNA	52.1	3.98	2.7e-28
NM_001111269.1	Hbb-bs	hemoglobin, beta adult s chain (Hbb-bs), mRNA	9497.14	7.97	2.8e-28
NM_001168543.1	Pltp	phospholipid transfer protein (Pltp), mRNA	22.59	5.15	4e-28
NM_053018.1	Cd9	CD9 molecule (Cd9), mRNA	172.03	3.74	4.2e-28
NM_013088.2	Ptpn11	protein tyrosine phosphatase, non-receptor type 11 (Ptpn11), transcript variant 2, mRNA	34.87	4.82	4.4e-28
NM_139096.2	Lgals3bp	galectin 3 binding protein (Lgals3bp), mRNA	110.7	4.22	5e-28
XM_039099510.1	Alas2	5'-aminolevulinate synthase 2 (Alas2), transcript variant X7, mRNA	212.31	8.21	5.2e-28
NM_001034137.1	Sp110	SP110 nuclear body protein (Sp110), mRNA	88.54	4.05	5.2e-28
NM_001001517.2	Rnf114	ring finger protein 114 (Rnf114), mRNA	38.5	3.66	6.2e-28
NM_001177593.1	Ptpn11	protein tyrosine phosphatase, non-receptor type 11 (Ptpn11), transcript variant 1, mRNA	13.9	4.9	7e-28
XM_006247079.4	Vmp1	vacuole membrane protein 1 (Vmp1), transcript variant X2, mRNA	3.14	24.23	8.6e-28
NM_001024967.1	Tmem106a	transmembrane protein 106A (Tmem106a), mRNA	5.67	13.25	8.9e-28
NM_001024792.1	Slc25a39	solute carrier family 25, member 39 (Slc25a39), mRNA	609.71	7.24	1e-27
XM_039104656.1	Ptprj	protein tyrosine phosphatase, receptor type, J (Ptprj), transcript variant X4, mRNA	27.33	4.11	1.5e-27
XM_039088562.1	Pdlim1	PDZ and LIM domain 1 (Pdlim1), transcript variant X1, mRNA	119.35	3.69	1.6e-27
NM_012967.1	Icam1	intercellular adhesion molecule 1 (Icam1), mRNA	27.72	5.53	1.7e-27
XM_039084203.1	Ebi3	Epstein-Barr virus induced 3 (Ebi3), transcript variant X1, mRNA	8.31	49.71	1.9e-27
XM_573525.7	Cnst	consortin, connexin sorting protein (Cnst), transcript variant X1, mRNA	25.66	4.21	1.9e-27
NM_001193569.1	Sgk1	serum/glucocorticoid regulated kinase 1 (Sgk1), transcript variant 2, mRNA	4.36	25.45	1.9e-27
XM_006249376.4	Trafd1	TRAF type zinc finger domain containing 1 (Trafd1), transcript variant X1, mRNA	5.5	16.92	2e-27
XM_039095170.1	Ddx60	DEXD/H-box helicase 60 (Ddx60), transcript variant X8, mRNA	7.27	6.04	2e-27
NM_138882.1	Pla1a	phospholipase A1 member A (Pla1a), mRNA	27.93	4.34	2e-27
XM_006243538.4	Plscr1	phospholipid scramblase 1 (Plscr1), transcript variant X3, mRNA	4.98	31.15	2.1e-27
XM_039108313.1	Hnrnpf	heterogeneous nuclear ribonucleoprotein F (Hnrnpf), transcript variant X2, mRNA	32.4	4.72	2.1e-27
XM_039081742.1	Vasp	vasodilator-stimulated phosphoprotein (Vasp), transcript variant X6, mRNA	57.13	5.16	2.3e-27
NM_153733.2	Serpinb10	serpin family B member 10 (Serpinb10), mRNA	15.21	7.13	3e-27
NM_013197.1	Alas2	5'-aminolevulinate synthase 2 (Alas2), mRNA; nuclear gene for mitochondrial product	1517.01	7.96	4e-27
XM_008759659.3	Mettl9	methyltransferase like 9 (Mettl9), transcript variant X3, mRNA	28.11	5.91	4.3e-27
NM_133409.2	Ilk	integrin-linked kinase (Ilk), mRNA	108.74	3.8	4.5e-27
XM_006245281.4	Dnajb2	DnaJ heat shock protein family (Hsp40) member B2 (Dnajb2), transcript variant X5, mRNA	12.63	7.72	4.5e-27
XM_039107106.1	Alox5	arachidonate 5-lipoxygenase (Alox5), transcript variant X1, mRNA	7.89	10.83	4.6e-27
NM_013043.2	Tsc22d1	TSC22 domain family, member 1 (Tsc22d1), transcript variant 2, mRNA	424.85	3.32	5.8e-27
NM_019337.1	Rgs10	regulator of G-protein signaling 10 (Rgs10), mRNA	80.46	4.05	7e-27
XR_005505432.1	Cd22	CD22 molecule (Cd22), transcript variant X5, misc_RNA	12.09	9.02	7.8e-27
NM_012637.2	Ptpn1	protein tyrosine phosphatase, non-receptor type 1 (Ptpn1), mRNA	64.81	4.31	8.1e-27
XM_039086424.1	Cd300le	Cd300 molecule-like family member E (Cd300le), transcript variant X1, mRNA	66.94	-28	8.8e-27
NM_001105720.2	Nfkbia	NFKB inhibitor alpha (Nfkbia), mRNA	184.64	4.42	9e-27
NM_012610.2	Ngfr	nerve growth factor receptor (Ngfr), mRNA	6.44	-43.52	9.5e-27
NM_012822.2	Alox5	arachidonate 5-lipoxygenase (Alox5), mRNA	12.06	12.22	9.5e-27
XM_039108029.1	Ly49si1	immunoreceptor Ly49si1 (Ly49si1), transcript variant X6, mRNA	39.27	-18.25	1e-26
XM_039097193.1	Rab27b	RAB27B, member RAS oncogene family (Rab27b), transcript variant X1, mRNA	18.04	4.52	1.2e-26
NM_171988.2	Bcl2l11	BCL2 like 11 (Bcl2l11), mRNA	10.92	3.72	1.3e-26
XM_008769327.3	Oasl2	2'-5' oligoadenylate synthetase-like 2 (Oasl2), transcript variant X1, mRNA	121.8	4.01	1.3e-26
XR_005491352.1	LOC120095660	uncharacterized LOC120095660 (LOC120095660), ncRNA	10.69	-35.19	1.5e-26
NM_001127543.1	Fermt3	fermitin family member 3 (Fermt3), mRNA	23.2	5.66	1.6e-26
XM_006244483.4	RGD1307182	similar to RIKEN cDNA B430306N03 gene (RGD1307182), transcript variant X1, mRNA	14.36	7.07	1.7e-26
XM_008760604.2	Ell2	elongation factor for RNA polymerase II 2 (Ell2), transcript variant X6, mRNA	16.35	18.49	1.7e-26
NM_053587.2	S100a9	S100 calcium binding protein A9 (S100a9), mRNA	3327.99	6.5	1.8e-26
XM_039112594.1	Pld4	phospholipase D family, member 4 (Pld4), transcript variant X1, mRNA	13.26	-30.99	1.8e-26
XR_005499332.1	LOC120099889	uncharacterized LOC120099889 (LOC120099889), transcript variant X4, ncRNA	2.87	13.8	2.2e-26
NM_198134.2	Bst2	bone marrow stromal cell antigen 2 (Bst2), mRNA	84.03	5.22	2.2e-26
XM_039096978.1	Fech	ferrochelatase (Fech), transcript variant X2, mRNA	65.13	8.44	2.2e-26
XM_039101115.1	LOC120093065	hemoglobin subunit beta-2 (LOC120093065), mRNA	8599.41	8.85	2.5e-26
NM_001009493.1	Oas3	2'-5'-oligoadenylate synthetase 3 (Oas3), mRNA	35.22	4.62	2.7e-26
XM_006233637.4	Il1rn	interleukin 1 receptor antagonist (Il1rn), transcript variant X3, mRNA	21.26	5.05	3.2e-26
NM_001008843.2	RT1-CE5	RT1 class I, locus CE5 (RT1-CE5), transcript variant 1, mRNA	27.46	3.72	3.3e-26
NM_031055.2	Mmp9	matrix metallopeptidase 9 (Mmp9), mRNA	35.89	6.37	3.8e-26
XM_039089662.1	Oas3	2'-5'-oligoadenylate synthetase 3 (Oas3), transcript variant X1, mRNA	26.37	4.7	4.1e-26
NM_173045.2	Zc3hav1	zinc finger CCCH-type containing, antiviral 1 (Zc3hav1), mRNA	9.79	5.12	4.4e-26
XM_006242503.4	Birc3	baculoviral IAP repeat-containing 3 (Birc3), transcript variant X5, mRNA	9.25	8.8	4.6e-26
XR_005504573.1	LOC102549805	uncharacterized LOC102549805 (LOC102549805), transcript variant X1, ncRNA	1.14	9.41	4.8e-26
NM_001034108.1	Marchf2	membrane associated ring-CH-type finger 2 (Marchf2), mRNA	162.04	5.41	4.9e-26
XM_039100970.1	Saal1	serum amyloid A-like 1 (Saal1), transcript variant X2, mRNA	23.34	1463.53	5.9e-26
NM_001106405.1	Cd180	CD180 molecule (Cd180), mRNA	61.89	-5.1	8.3e-26
NM_022800.1	P2ry12	purinergic receptor P2Y12 (P2ry12), mRNA	22.51	5.53	9.6e-26
XM_039088833.1	Filip1l	filamin A interacting protein 1-like (Filip1l), transcript variant X5, mRNA	41.36	-7.59	9.6e-26
XM_006248377.4	Pla1a	phospholipase A1 member A (Pla1a), transcript variant X1, mRNA	34.91	4.16	9.9e-26
NM_001108394.1	Zcchc24	zinc finger CCHC-type containing 24 (Zcchc24), mRNA	8.3	-16.18	1e-25
NM_013114.2	Selp	selectin P (Selp), mRNA	5.9	15.15	1.2e-25
NM_001108923.2	Inpp5a	inositol polyphosphate-5-phosphatase A (Inpp5a), mRNA	15.69	3.85	1.3e-25
NM_013038.3	Stxbp1	syntaxin binding protein 1 (Stxbp1), mRNA	19.44	3.71	1.4e-25
XM_006228675.2	Sirt2	sirtuin 2 (Sirt2), transcript variant X4, mRNA	111.81	7.04	1.4e-25
NM_001002016.2	Lmna	lamin A/C (Lmna), mRNA	20.33	5.4	1.5e-25
XM_039103881.1	Ifi44l	interferon-induced protein 44-like (Ifi44l), transcript variant X2, mRNA	16.98	4.91	1.5e-25
XM_039096951.1	Riok3	RIO kinase 3 (Riok3), transcript variant X2, mRNA	31.2	4.42	1.5e-25
NM_001271224.1	Rnf11l1	ring finger protein 11-like 1 (Rnf11l1), mRNA	138.19	3.68	1.6e-25
NM_001012007.1	Irgm	immunity-related GTPase M (Irgm), mRNA	37.37	3.86	1.6e-25
XM_039099046.1	Srgn	serglycin (Srgn), transcript variant X1, mRNA	382.61	3.47	1.7e-25
NM_001105717.2	Dpysl2	dihydropyrimidinase-like 2 (Dpysl2), mRNA	25.42	-4.15	1.7e-25
NM_013198.1	Maob	monoamine oxidase B (Maob), mRNA	7.4	-63.24	2.1e-25
NM_001100547.1	Dusp7	dual specificity phosphatase 7 (Dusp7), mRNA	43.3	-4.45	2.3e-25
NM_031530.1	Ccl2	C-C motif chemokine ligand 2 (Ccl2), mRNA	23.62	77.05	2.4e-25
XM_039094810.1	Slc7a2	solute carrier family 7 member 2 (Slc7a2), transcript variant X1, mRNA	3.5	637.12	2.6e-25
XM_006230576.4	Cd151	CD151 molecule (Raph blood group) (Cd151), transcript variant X1, mRNA	23.86	3.89	4.4e-25
XM_227820.9	Ifi44l	interferon-induced protein 44-like (Ifi44l), transcript variant X1, mRNA	25.33	4.32	4.4e-25
XR_005493472.1	LOC120096688	uncharacterized LOC120096688 (LOC120096688), transcript variant X2, ncRNA	10.87	18.47	5.2e-25
NM_017169.2	Prdx2	peroxiredoxin 2 (Prdx2), mRNA	362.28	6.43	5.3e-25
XR_005497318.1	Mpig6b	megakaryocyte and platelet inhibitory receptor G6b (Mpig6b), transcript variant X5, misc_RNA	47.37	6.06	5.8e-25
XM_006229913.4	Hbb-b1	hemoglobin, beta adult major chain (Hbb-b1), transcript variant X1, mRNA	623.19	8.36	8.7e-25
NM_138542.2	Rhov	ras homolog family member V (Rhov), mRNA	20.07	4.53	9.4e-25
XM_236536.10	Morc4	MORC family CW-type zinc finger 4 (Morc4), transcript variant X1, mRNA	8.09	4.03	9.6e-25
XM_006238615.4	Tal1	TAL bHLH transcription factor 1, erythroid differentiation factor (Tal1), transcript variant X5, mRNA	28.15	5.15	9.9e-25
XM_006236301.4	Mkrn1	makorin ring finger protein 1 (Mkrn1), transcript variant X1, mRNA	276.64	6.08	1.1e-24
NM_001007619.1	Tmed5	transmembrane p24 trafficking protein 5 (Tmed5), mRNA	34.65	3.54	1.1e-24
XM_006239472.4	Tnfrsf9	TNF receptor superfamily member 9 (Tnfrsf9), transcript variant X1, mRNA	5.54	131.64	1.1e-24
XM_006244606.4	Pla2g7	phospholipase A2 group VII (Pla2g7), transcript variant X1, mRNA	77.89	-6.12	1.2e-24
NM_133546.3	Ppp1r15a	protein phosphatase 1, regulatory subunit 15A (Ppp1r15a), mRNA	35.81	3.97	1.4e-24
XM_039108092.1	RGD1565355	similar to fatty acid translocase/CD36 (RGD1565355), transcript variant X1, mRNA	37.24	-6.54	2e-24
NM_001191569.1	Dennd2c	DENN domain containing 2C (Dennd2c), mRNA	3.21	9.84	2e-24
XM_039104192.1	Zbp1	Z-DNA binding protein 1 (Zbp1), transcript variant X5, mRNA	7.41	46.72	2.2e-24
NM_024381.2	Gk	glycerol kinase (Gk), mRNA	11.98	5.34	2.3e-24
NM_173147.2	Vps54	VPS54 subunit of GARP complex (Vps54), mRNA	23.07	4.02	3.3e-24
NM_145096.3	Zdhhc2	zinc finger DHHC-type palmitoyltransferase 2 (Zdhhc2), mRNA	6.56	14.99	3.4e-24
XM_039099507.1	Alas2	5'-aminolevulinate synthase 2 (Alas2), transcript variant X4, mRNA	230.48	9.19	3.4e-24
XR_005502044.1	LOC120101503	uncharacterized LOC120101503 (LOC120101503), transcript variant X5, ncRNA	6.25	18.61	3.8e-24
XM_039086187.1	Cd300c2	CD300C molecule 2 (Cd300c2), transcript variant X1, mRNA	21.23	-47.1	3.9e-24
XM_039098952.1	Mpig6b	megakaryocyte and platelet inhibitory receptor G6b (Mpig6b), transcript variant X2, mRNA	34.98	4.67	4.2e-24
XM_006255278.3	Adgre5	adhesion G protein-coupled receptor E5 (Adgre5), transcript variant X1, mRNA	32.64	5.13	4.2e-24
XM_039093624.1	Tgm1	transglutaminase 1 (Tgm1), transcript variant X3, mRNA	2.37	61.55	4.7e-24
NM_001108722.1	Glrx5	glutaredoxin 5 (Glrx5), mRNA	28.45	6.66	4.8e-24
XM_006235674.4	Zbp1	Z-DNA binding protein 1 (Zbp1), transcript variant X2, mRNA	7.3	6.51	5.4e-24
NM_017087.1	Bgn	biglycan (Bgn), mRNA	90.97	3.49	5.9e-24
NM_001035002.1	Atad1	ATPase family, AAA domain containing 1 (Atad1), mRNA	17.08	3.98	6.4e-24
NM_012915.3	Atp5if1	ATP synthase inhibitory factor subunit 1 (Atp5if1), mRNA; nuclear gene for mitochondrial product	606.94	4.47	7.7e-24
XM_006248146.4	Mx1	myxovirus (influenza virus) resistance 1 (Mx1), transcript variant X2, mRNA	3.28	13.8	7.9e-24
XR_005496664.1	Rad23a	RAD23 homolog A, nucleotide excision repair protein (Rad23a), transcript variant X2, misc_RNA	31.47	5.44	8e-24
NM_001108813.2	Ndufa1	NADH:ubiquinone oxidoreductase subunit A1 (Ndufa1), mRNA	155.46	4.36	9e-24
NM_001107114.1	Usp25	ubiquitin specific peptidase 25 (Usp25), mRNA	48.94	3.04	9.9e-24
XM_039103284.1	S100a9	S100 calcium binding protein A9 (S100a9), transcript variant X1, mRNA	90.55	5.66	1.1e-23
XM_039088120.1	Mylk	myosin light chain kinase (Mylk), transcript variant X4, mRNA	43.05	3.52	1.3e-23
NM_001127531.2	Ap1s2	adaptor related protein complex 1 subunit sigma 2 (Ap1s2), mRNA	59.8	-4.61	1.4e-23
XM_006249136.4	Clip2	CAP-GLY domain containing linker protein 2 (Clip2), transcript variant X2, mRNA	21.8	3.82	1.6e-23
NM_001108153.1	Sema7a	semaphorin 7A (John Milton Hagen blood group) (Sema7a), mRNA	19.28	6.02	1.8e-23
NM_053455.2	Fgl2	fibrinogen-like 2 (Fgl2), mRNA	155.16	3.74	1.8e-23
XM_039082530.1	Cgas	cyclic GMP-AMP synthase (Cgas), transcript variant X1, mRNA	4.15	5.96	1.8e-23
NM_001271328.1	Hsh2d	hematopoietic SH2 domain containing (Hsh2d), mRNA	24.81	3.76	2e-23
NM_053725.2	Itga6	integrin subunit alpha 6 (Itga6), mRNA	77.74	3.18	2e-23
NM_145085.2	Pcyox1	prenylcysteine oxidase 1 (Pcyox1), mRNA	18.5	-7.12	2.4e-23
NM_001109484.1	Myl6	myosin light chain 6 (Myl6), mRNA	1358.25	3.42	2.7e-23
NM_031005.4	Actn1	actinin, alpha 1 (Actn1), mRNA	21.46	4.15	3.2e-23
NM_019295.1	Cd5	Cd5 molecule (Cd5), mRNA	51.48	-4.76	3.2e-23
XM_006254761.4	Cd74	CD74 molecule (Cd74), transcript variant X1, mRNA	214.04	-4.03	3.3e-23
XM_039083403.1	Sp110	SP110 nuclear body protein (Sp110), transcript variant X3, mRNA	23.28	4.58	3.5e-23
NM_019336.2	Rgs1	regulator of G-protein signaling 1 (Rgs1), mRNA	15.56	8.95	3.6e-23
XM_002729553.6	LOC100360087	ferritin light chain 1-like (LOC100360087), mRNA	42.01	6.29	3.9e-23
NM_021696.2	Serpinb2	serpin family B member 2 (Serpinb2), mRNA	3.37	54	4.8e-23
NM_022179.2	Hk3	hexokinase 3 (Hk3), mRNA	6.86	9.95	4.8e-23
XM_017600107.2	Mfap3l	microfibril associated protein 3 like (Mfap3l), transcript variant X1, mRNA	17.91	4.2	5.2e-23
XM_006252091.3	Bnip3l	BCL2 interacting protein 3 like (Bnip3l), transcript variant X5, mRNA	455.84	7.64	6.4e-23
XM_039099505.1	Alas2	5'-aminolevulinate synthase 2 (Alas2), transcript variant X2, mRNA	11.96	10.87	7.2e-23
NM_001106368.1	Pik3ap1	phosphoinositide-3-kinase adaptor protein 1 (Pik3ap1), mRNA	25.24	5.15	9.2e-23
XM_213639.10	Crybg3	crystallin beta-gamma domain containing 3 (Crybg3), mRNA	4.09	-7.29	1e-22
XM_039113368.1	LOC120103613	uncharacterized LOC120103613 (LOC120103613), mRNA	2.83	34.47	1.1e-22
NM_001106286.1	Lyve1	lymphatic vessel endothelial hyaluronan receptor 1 (Lyve1), mRNA	10.05	4.48	1.1e-22
NM_012764.2	Gata1	GATA binding protein 1 (Gata1), mRNA	22.17	5.39	1.3e-22
NM_053394.2	Klf5	Kruppel-like factor 5 (Klf5), mRNA	5.36	9.76	1.3e-22
XM_006249123.4	Fis1	fission, mitochondrial 1 (Fis1), transcript variant X3, mRNA	220.33	4.83	1.3e-22
XM_039090977.1	LOC498276	Fc gamma receptor II beta (LOC498276), transcript variant X2, mRNA	69.3	4.24	1.4e-22
NM_001013190.1	Rad23a	RAD23 homolog A, nucleotide excision repair protein (Rad23a), mRNA	33.58	7.1	1.4e-22
NM_022399.2	Calr	calreticulin (Calr), mRNA	332.52	2.93	1.6e-22
NM_013052.2	Ywhah	tyrosine 3-monooxygenase/tryptophan 5-monooxygenase activation protein, eta (Ywhah), mRNA	387.61	3.35	1.6e-22
XM_039109121.1	Klf4	Kruppel like factor 4 (Klf4), transcript variant X1, mRNA	14.63	-12.22	1.7e-22
NM_138895.2	Ubb	ubiquitin B (Ubb), mRNA	3151.23	4.77	1.7e-22
XM_008769847.3	Cr2	complement C3d receptor 2 (Cr2), transcript variant X1, mRNA	14.11	-3.7	1.9e-22
NM_012976.2	Lgals5	galectin 5 (Lgals5), mRNA	298.63	6.29	1.9e-22
NM_130821.2	Samsn1	SAM domain, SH3 domain and nuclear localization signals, 1 (Samsn1), mRNA	158.9	3.39	1.9e-22
NM_199093.2	Serping1	serpin family G member 1 (Serping1), mRNA	3.92	61.83	2e-22
XM_006251608.3	Rtn4	reticulon 4 (Rtn4), transcript variant X4, mRNA	34.79	5.02	2.3e-22
NM_053340.2	Ogfr	opioid growth factor receptor (Ogfr), mRNA	51.36	3.31	2.4e-22
NM_031837.2	Septin9	septin 9 (Septin9), transcript variant 1, mRNA	17.8	-6.22	2.5e-22
NM_031034.2	Gna12	G protein subunit alpha 12 (Gna12), mRNA	21.86	4.38	3e-22
XM_006239638.4	Fez2	fasciculation and elongation protein zeta 2 (Fez2), transcript variant X4, mRNA	11.4	5.96	3e-22
NM_031695.2	St3gal2	ST3 beta-galactoside alpha-2,3-sialyltransferase 2 (St3gal2), mRNA	10.25	5.72	3.1e-22
XM_006254439.4	Taf4b	TATA-box binding protein associated factor 4b (Taf4b), transcript variant X1, mRNA	7.78	4.81	3.1e-22
NM_198740.2	RT1-DMb	RT1 class II, locus DMb (RT1-DMb), mRNA	65.73	-7.38	3.1e-22
NM_001277057.1	Ascc3	activating signal cointegrator 1 complex subunit 3 (Ascc3), mRNA	11.33	3.39	3.2e-22
XM_006235064.4	Smox	spermine oxidase (Smox), transcript variant X2, mRNA	16.46	5.51	3.2e-22
NM_001007695.1	Tcp11	t-complex 11 (Tcp11), mRNA	4.25	15.83	3.3e-22
XM_039091649.1	Vps54	VPS54 subunit of GARP complex (Vps54), transcript variant X4, mRNA	20.75	3.6	3.4e-22
NM_017097.2	Ctsc	cathepsin C (Ctsc), mRNA	39.15	3.17	4e-22
NM_030845.2	Cxcl1	C-X-C motif chemokine ligand 1 (Cxcl1), mRNA	9.49	297.52	4.7e-22
NM_012747.2	Stat3	signal transducer and activator of transcription 3 (Stat3), mRNA	36.46	3.49	4.7e-22
NM_001191978.1	Clec1b	C-type lectin domain family 1, member B (Clec1b), mRNA	178.83	3.23	4.9e-22
NM_024351.2	Hspa8	heat shock protein family A (Hsp70) member 8 (Hspa8), mRNA	715.23	3.46	5.1e-22
NM_001008831.3	RT1-Ba	RT1 class II, locus Ba (RT1-Ba), mRNA	556.1	-3.67	5.1e-22
XM_039107987.1	C1rl	complement C1r subcomponent like (C1rl), transcript variant X1, mRNA	9.63	7.46	5.6e-22
XM_039105162.1	Prdx5	peroxiredoxin 5 (Prdx5), transcript variant X2, mRNA	101.39	30.43	8.6e-22
XM_039100232.1	Dipk2b	divergent protein kinase domain 2B (Dipk2b), transcript variant X1, mRNA	0.97	56.99	8.7e-22
NM_033349.2	Hagh	hydroxyacyl glutathione hydrolase (Hagh), mRNA	102.91	7.28	9.4e-22
NM_001008521.2	Twf1	twinfilin actin-binding protein 1 (Twf1), mRNA	22.66	3.6	1.4e-21
XM_039079613.1	RGD1304694	similar to CG9646-PA (RGD1304694), transcript variant X1, mRNA	8.79	-7.36	1.4e-21
XM_006253215.3	Ppp1r3b	protein phosphatase 1, regulatory subunit 3B (Ppp1r3b), transcript variant X1, mRNA	7.82	6.43	1.6e-21
XM_039096950.1	Riok3	RIO kinase 3 (Riok3), transcript variant X1, mRNA	79.73	4.76	1.8e-21
NM_134466.3	Stau2	staufen double-stranded RNA binding protein 2 (Stau2), transcript variant LS, mRNA	11.6	4.19	1.9e-21
NM_139341.1	Slc15a3	solute carrier family 15 member 3 (Slc15a3), mRNA	41.73	3.69	2e-21
XM_008763372.2	Bcat1	branched chain amino acid transaminase 1 (Bcat1), transcript variant X3, mRNA	18.61	6.81	2e-21
XM_039109107.1	Rnf11l1	ring finger protein 11-like 1 (Rnf11l1), transcript variant X1, mRNA	83.06	3.51	2.2e-21
NM_013189.2	Gnaz	G protein subunit alpha z (Gnaz), mRNA	7.63	19.03	2.2e-21
NM_001012224.1	Nfe2	nuclear factor, erythroid 2 (Nfe2), mRNA	270.31	2.94	2.4e-21
XM_039091628.1	Anxa3	annexin A3 (Anxa3), transcript variant X1, mRNA	8.15	8.01	2.5e-21
XM_006256988.4	Gk	glycerol kinase (Gk), transcript variant X8, mRNA	5.32	6.08	2.6e-21
XM_039108451.1	Ybx3	Y box binding protein 3 (Ybx3), transcript variant X2, mRNA	1237.24	6.27	2.7e-21
NM_001012353.1	MGC108823	similar to interferon-inducible GTPase (MGC108823), mRNA	52.92	3.59	2.8e-21
XM_006236302.4	Mkrn1	makorin ring finger protein 1 (Mkrn1), transcript variant X2, mRNA	153.13	5.9	2.9e-21
XM_017595896.2	Scamp5	secretory carrier membrane protein 5 (Scamp5), transcript variant X1, mRNA	5.38	24.35	3.5e-21
NM_001107729.1	Ifi44	interferon-induced protein 44 (Ifi44), mRNA	22.82	5.66	3.7e-21
XM_039095315.1	Gmpr	guanosine monophosphate reductase (Gmpr), transcript variant X1, mRNA	17.81	6.41	3.7e-21
XM_006251631.2	Adk	adenosine kinase (Adk), transcript variant X1, mRNA	16.38	4.37	3.8e-21
XM_006249803.4	Tmcc2	transmembrane and coiled-coil domain family 2 (Tmcc2), transcript variant X3, mRNA	18.89	8.7	4.2e-21
XM_039108450.1	Ybx3	Y box binding protein 3 (Ybx3), transcript variant X1, mRNA	1563.23	6.49	4.3e-21
NM_001202463.1	Cd300le	Cd300 molecule-like family member E (Cd300le), mRNA	38.86	-32.77	4.3e-21
NM_001134959.1	Pear1	platelet endothelial aggregation receptor 1 (Pear1), mRNA	4.38	5.9	4.3e-21
NM_001039344.2	Tes	testin LIM domain protein (Tes), mRNA	28.81	2.99	4.4e-21
NM_001105814.3	Abr	ABR activator of RhoGEF and GTPase (Abr), mRNA	19.77	-3.47	4.5e-21
XM_039086093.1	Dhx58	DEXH-box helicase 58 (Dhx58), transcript variant X3, mRNA	3.58	16.61	4.8e-21
NM_053313.1	F2rl2	coagulation factor II (thrombin) receptor-like 2 (F2rl2), mRNA	213.28	3.64	5.1e-21
XR_005500406.1	LOC120100581	uncharacterized LOC120100581 (LOC120100581), ncRNA	37.29	6.42	5.7e-21
NM_001083898.1	Ccdc92	coiled-coil domain containing 92 (Ccdc92), mRNA	40.02	3.42	6e-21
XM_006248449.4	Muc20	mucin 20, cell surface associated (Muc20), transcript variant X1, mRNA	3.42	6.27	6.2e-21
XR_005503253.1	Znrf2	zinc and ring finger 2 (Znrf2), transcript variant X2, misc_RNA	14.59	-3.31	6.5e-21
NM_133572.2	Cdc25b	cell division cycle 25B (Cdc25b), transcript variant 1, mRNA	243.52	6.46	7.1e-21
XM_039081733.1	Vasp	vasodilator-stimulated phosphoprotein (Vasp), transcript variant X3, mRNA	46.07	4.37	8.6e-21
XM_006252301.4	Fndc3a	fibronectin type III domain containing 3a (Fndc3a), transcript variant X8, mRNA	5.44	5.11	9.8e-21
XM_006241402.3	Rassf3	Ras association domain family member 3 (Rassf3), transcript variant X1, mRNA	35.21	-4.07	1e-20
NM_053843.3	Fcgr2a	Fc fragment of IgG, low affinity IIa, receptor (Fcgr2a), mRNA	25.13	4.19	1e-20
NM_031841.2	Scd2	stearoyl-Coenzyme A desaturase 2 (Scd2), mRNA	42.72	-3.49	1e-20
XM_002729615.4	Mfsd2b	major facilitator superfamily domain containing 2B (Mfsd2b), transcript variant X2, mRNA	2.45	34.66	1e-20
NM_138843.2	Mpst	mercaptopyruvate sulfurtransferase (Mpst), mRNA	36.75	5.96	1.1e-20
XM_006240482.1	Glrx5	glutaredoxin 5 (Glrx5), transcript variant X1, mRNA	30.2	5.99	1.2e-20
NM_053373.1	Pglyrp1	peptidoglycan recognition protein 1 (Pglyrp1), mRNA	54.51	8.33	1.3e-20
NM_001014041.1	Tent5c	terminal nucleotidyltransferase 5C (Tent5c), mRNA	21.55	10.01	1.4e-20
NM_001107370.1	Cd226	CD226 molecule (Cd226), mRNA	23.25	4.5	1.4e-20
NM_172243.2	Ppif	peptidylprolyl isomerase F (Ppif), mRNA; nuclear gene for mitochondrial product	142.11	5.41	1.4e-20
NM_001034164.1	Stat1	signal transducer and activator of transcription 1 (Stat1), transcript variant beta, mRNA	84.24	2.81	1.6e-20
NM_053808.1	F2rl3	F2R like thrombin or trypsin receptor 3 (F2rl3), mRNA	6	11.81	1.7e-20
NM_001109604.1	Tmem86b	transmembrane protein 86B (Tmem86b), mRNA	62.72	5.66	1.7e-20
XM_002727796.6	Tlcd3a	TLC domain containing 3A (Tlcd3a), transcript variant X2, mRNA	4.97	15.63	1.8e-20
NM_001013110.1	Tf	transferrin (Tf), mRNA	157.08	5.42	1.8e-20
NM_001035221.1	Ypel5	yippee-like 5 (Ypel5), mRNA	107.14	3.06	2.2e-20
NM_012751.1	Slc2a4	solute carrier family 2 member 4 (Slc2a4), mRNA	17.04	3.67	2.5e-20
XR_005487913.1	Mmp8	matrix metallopeptidase 8 (Mmp8), transcript variant X1, misc_RNA	123.63	4.51	2.5e-20
NM_024140.3	Nrgn	neurogranin (Nrgn), mRNA	934.49	3.15	2.8e-20
NM_023985.1	Trib1	tribbles pseudokinase 1 (Trib1), mRNA	24.13	4.23	2.8e-20
XM_039098677.1	RT1-A3	RT1 class I, locus A3 (RT1-A3), transcript variant X2, mRNA	41.49	3.25	2.9e-20
XM_001059150.7	Treml2	triggering receptor expressed on myeloid cells-like 2 (Treml2), transcript variant X1, mRNA	73.68	3	3.2e-20
NM_001107124.1	Ttyh3	tweety family member 3 (Ttyh3), mRNA	102.31	3.07	3.7e-20
NM_001100674.1	Map2k3	mitogen activated protein kinase kinase 3 (Map2k3), mRNA	24.46	3.75	3.7e-20
XM_006252011.4	Ltb4r	leukotriene B4 receptor (Ltb4r), transcript variant X1, mRNA	6.86	24.65	3.7e-20
XM_039102837.1	Fyb1	FYN binding protein 1 (Fyb1), transcript variant X7, mRNA	19.32	3.23	3.9e-20
XM_006255627.4	St3gal2	ST3 beta-galactoside alpha-2,3-sialyltransferase 2 (St3gal2), transcript variant X3, mRNA	6.74	5.54	4.5e-20
NM_019291.1	Car2	carbonic anhydrase 2 (Car2), mRNA	202.93	6.16	4.6e-20
NM_024484.2	Alas1	5'-aminolevulinate synthase 1 (Alas1), mRNA; nuclear gene for mitochondrial product	18.34	4.39	4.7e-20
NM_001004210.2	Xbp1	X-box binding protein 1 (Xbp1), transcript variant 1, mRNA	45.37	4.34	6.2e-20
XM_039081249.1	Ngp	neutrophilic granule protein (Ngp), transcript variant X1, mRNA	6.89	58.59	6.2e-20
NM_022197.2	Fos	Fos proto-oncogene, AP-1 transcription factor subunit (Fos), mRNA	30.09	-8.44	6.7e-20
XM_006243536.3	Plscr1	phospholipid scramblase 1 (Plscr1), transcript variant X1, mRNA	3.52	32.87	6.8e-20
XM_039090522.1	Bcl3	BCL3, transcription coactivator (Bcl3), transcript variant X2, mRNA	7.9	9.59	6.8e-20
NM_001033671.1	Bcl2l1	Bcl2-like 1 (Bcl2l1), transcript variant 4, mRNA	7.81	9.07	7e-20
NM_001109630.1	Slc12a6	solute carrier family 12, member 6 (Slc12a6), mRNA	26.96	-4.1	7.5e-20
NM_001008886.2	RT1-S3	RT1 class Ib, locus S3 (RT1-S3), mRNA	60.45	2.84	7.6e-20
XM_006232581.4	Tpm3	tropomyosin 3 (Tpm3), transcript variant X12, mRNA	23.05	3.66	7.9e-20
NM_001135020.1	Sec61g	SEC61 translocon subunit gamma (Sec61g), mRNA	87.66	5.21	8.5e-20
NM_013146.3	Cald1	caldesmon 1 (Cald1), mRNA	6.9	20.67	8.9e-20
NM_199111.1	Nfkbie	NFKB inhibitor epsilon (Nfkbie), mRNA	41.46	3.42	9.4e-20
XM_006249292.4	Ccdc92	coiled-coil domain containing 92 (Ccdc92), transcript variant X1, mRNA	14.05	4.32	1e-19
NM_001002024.1	Slco4c1	solute carrier organic anion transporter family, member 4C1 (Slco4c1), mRNA	1.77	72.27	1.1e-19
XM_006231275.4	Lipa	lipase A, lysosomal acid type (Lipa), transcript variant X1, mRNA	37.2	-7.09	1.2e-19
XM_039082644.1	Nbeal2	neurobeachin-like 2 (Nbeal2), transcript variant X6, mRNA	22.83	-3.95	1.2e-19
XM_039092999.1	Clu	clusterin (Clu), transcript variant X2, mRNA	99.33	3.65	1.4e-19
XM_006228676.4	Sirt2	sirtuin 2 (Sirt2), transcript variant X5, mRNA	43.37	6.66	1.4e-19
XM_039104244.1	Il1a	interleukin 1 alpha (Il1a), transcript variant X1, mRNA	1.9	65.31	1.5e-19
NM_001034110.1	Ctsf	cathepsin F (Ctsf), mRNA	29.7	-8.91	1.6e-19
XM_006237089.4	Clec1b	C-type lectin domain family 1, member B (Clec1b), transcript variant X2, mRNA	142.68	2.99	1.6e-19
NM_153624.2	Npc1	NPC intracellular cholesterol transporter 1 (Npc1), mRNA	15.67	-4.11	1.6e-19
XM_006229791.3	Plekhb1	pleckstrin homology domain containing B1 (Plekhb1), transcript variant X2, mRNA	107.59	6.85	1.7e-19
XM_039099064.1	Snx3	sorting nexin 3 (Snx3), transcript variant X2, mRNA	35.12	8.63	1.9e-19
NM_053376.1	Kif2a	kinesin family member 2A (Kif2a), mRNA	36.86	2.97	2e-19
NM_001011901.2	Hsph1	heat shock protein family H (Hsp110) member 1 (Hsph1), mRNA	23.3	5.09	2.1e-19
NM_001195504.1	Stmp1	short transmembrane mitochondrial protein 1 (Stmp1), transcript variant 2, mRNA	2517.1	3.18	2.1e-19
NM_013083.2	Hspa5	heat shock protein family A (Hsp70) member 5 (Hspa5), mRNA	101.91	3.13	2.4e-19
NM_053983.2	Cd52	CD52 molecule (Cd52), mRNA	923.96	6.46	2.4e-19
NM_012977.2	Lgals9	galectin 9 (Lgals9), transcript variant 2, mRNA	23.32	3.76	2.5e-19
NM_031010.2	Alox15	arachidonate 15-lipoxygenase (Alox15), mRNA	63.03	6.7	2.5e-19
NM_031036.2	Gnaq	G protein subunit alpha q (Gnaq), mRNA	8.52	3.43	2.5e-19
XM_039108591.1	LOC103690031	sterile alpha motif domain-containing protein 9-like (LOC103690031), transcript variant X6, mRNA	1.98	10.11	2.6e-19
NM_130819.2	Dhrs9	dehydrogenase/reductase 9 (Dhrs9), mRNA	11.09	6.07	2.9e-19
NM_001106108.2	Irf4	interferon regulatory factor 4 (Irf4), mRNA	8.32	4.29	3.4e-19
NM_017008.4	Gapdh	glyceraldehyde-3-phosphate dehydrogenase (Gapdh), mRNA	788.6	3.43	3.5e-19
NM_001107737.1	Itga4	integrin subunit alpha 4 (Itga4), mRNA	33.59	-3.87	3.7e-19
XM_006232508.4	Rxfp1	relaxin family peptide receptor 1 (Rxfp1), transcript variant X1, mRNA	1.65	12.23	3.7e-19
NM_001388499.1	Lgals9	galectin 9 (Lgals9), transcript variant 1, mRNA	26.36	3.58	3.7e-19
XM_006238694.4	Mknk1	MAPK interacting serine/threonine kinase 1 (Mknk1), transcript variant X2, mRNA	5.46	6.51	4e-19
XM_006255028.4	Cd226	CD226 molecule (Cd226), transcript variant X5, mRNA	22.52	3.97	4.4e-19
XM_039094638.1	Gsg1l	GSG1-like (Gsg1l), transcript variant X2, mRNA	7.05	6.59	4.4e-19
NM_001005902.1	Abtb1	ankyrin repeat and BTB domain containing 1 (Abtb1), mRNA	38.75	3.82	4.4e-19
XM_039093399.1	Acod1	aconitate decarboxylase 1 (Acod1), transcript variant X5, mRNA	6.84	109.06	4.4e-19
NM_024356.1	Gch1	GTP cyclohydrolase 1 (Gch1), mRNA	12.7	7.89	4.9e-19
NM_001173972.1	Itga8	integrin subunit alpha 8 (Itga8), mRNA	0.69	69.96	5e-19
XR_001836411.2	Camk2d	calcium/calmodulin-dependent protein kinase II delta (Camk2d), transcript variant X21, misc_RNA	11.25	-5.71	5.6e-19
NM_001025054.1	Shfl	shiftless antiviral inhibitor of ribosomal frameshifting (Shfl), mRNA	9.77	5.41	6e-19
NM_001109398.1	Mthfd2	methylenetetrahydrofolate dehydrogenase (NADP+ dependent) 2, methenyltetrahydrofolate cyclohydrolase (Mthfd2), mRNA	17.63	3.41	6e-19
NM_207605.3	Sh2d2a	SH2 domain containing 2A (Sh2d2a), mRNA	43.59	2.98	6.1e-19
NM_022221.1	Mmp8	matrix metallopeptidase 8 (Mmp8), mRNA	94.05	4.71	6.6e-19
XM_008770981.3	Slmap	sarcolemma associated protein (Slmap), transcript variant X26, mRNA	3.25	7.9	6.9e-19
NM_001108101.1	Irak3	interleukin-1 receptor-associated kinase 3 (Irak3), mRNA	18.59	3.8	7.1e-19
XM_006250323.4	Cadm3	cell adhesion molecule 3 (Cadm3), transcript variant X1, mRNA	6.44	-81.31	8e-19
NM_031129.3	Elob	elongin B (Elob), mRNA	72.62	4.13	8.1e-19
XM_001069014.5	Gypa	glycophorin A (Gypa), transcript variant X3, mRNA	73.78	5.87	8.1e-19
NM_212522.1	Sptb	spectrin, beta, erythrocytic (Sptb), mRNA	23.34	7.4	8.6e-19
XM_039095163.1	Ddx60	DEXD/H-box helicase 60 (Ddx60), transcript variant X2, mRNA	2.68	10.31	8.7e-19
XM_039090269.1	Fcgr2a	Fc fragment of IgG, low affinity IIa, receptor (Fcgr2a), transcript variant X2, mRNA	23.5	22.2	9.1e-19
NM_053850.2	Blvra	biliverdin reductase A (Blvra), mRNA	30.65	-57.76	1e-18
NM_001025119.1	Plekho1	pleckstrin homology domain containing O1 (Plekho1), mRNA	53.54	4.47	1e-18
NM_001115038.2	Sin3b	SIN3 transcription regulator family member B (Sin3b), mRNA	15.78	6.49	1.1e-18
XM_003750018.4	LOC100910768	ubiquitin-40S ribosomal protein S27a-like (LOC100910768), mRNA	71.61	4.57	1.3e-18
NM_207587.2	Adipor1	adiponectin receptor 1 (Adipor1), mRNA	129.81	4.3	1.3e-18
XM_039104784.1	Gsn	gelsolin (Gsn), transcript variant X3, mRNA	13.03	4.51	1.3e-18
NM_001011904.1	Rnf10	ring finger protein 10 (Rnf10), mRNA	298.52	5.34	1.3e-18
NM_001014031.1	Cmtr1	cap methyltransferase 1 (Cmtr1), mRNA	14.16	2.94	1.6e-18
NM_001014039.1	Tnfaip8l2	TNF alpha induced protein 8 like 2 (Tnfaip8l2), mRNA	100.08	-3.97	1.6e-18
XM_039097678.1	Tbc1d9	TBC1 domain family member 9 (Tbc1d9), transcript variant X2, mRNA	3.52	-31.21	1.7e-18
XM_039098665.1	RT1-CE5	RT1 class I, locus CE5 (RT1-CE5), transcript variant X11, mRNA	69.86	2.9	1.7e-18
XM_002727758.6	Hbq1b	hemoglobin subunit theta 1B (Hbq1b), transcript variant X1, mRNA	77.85	6.56	1.8e-18
NM_001014119.2	Dhrs11	dehydrogenase/reductase 11 (Dhrs11), mRNA	26.7	6.25	1.8e-18
XM_006234377.4	Lnpk	lunapark, ER junction formation factor (Lnpk), transcript variant X1, mRNA	4.05	20.28	1.9e-18
XM_006246824.4	Alox15	arachidonate 15-lipoxygenase (Alox15), transcript variant X2, mRNA	207.01	7.4	2.4e-18
NM_001191939.1	Msr1	macrophage scavenger receptor 1 (Msr1), mRNA	3.57	88.64	2.4e-18
XM_039086367.1	Dhrs11	dehydrogenase/reductase 11 (Dhrs11), transcript variant X4, mRNA	24.61	8.35	2.6e-18
NM_012570.2	Glud1	glutamate dehydrogenase 1 (Glud1), mRNA; nuclear gene for mitochondrial product	44.18	-2.97	2.7e-18
NM_001372012.1	Dock5	dedicator of cytokinesis 5 (Dock5), mRNA	8.66	-6.01	2.9e-18
XM_220058.7	Ifit1bl	interferon-induced protein with tetratricopeptide repeats 1B-like (Ifit1bl), transcript variant X1, mRNA	12.67	3.63	2.9e-18
XM_219527.9	Batf2	basic leucine zipper ATF-like transcription factor 2 (Batf2), transcript variant X4, mRNA	2.07	16.77	2.9e-18
XM_039090070.1	Rasa4	RAS p21 protein activator 4 (Rasa4), transcript variant X2, mRNA	11.28	5.52	3e-18
NM_001134687.1	Slc35e3	solute carrier family 35, member E3 (Slc35e3), mRNA	13.51	-5.35	3.1e-18
XM_006230811.4	Fermt3	fermitin family member 3 (Fermt3), transcript variant X1, mRNA	76.27	3.63	3.1e-18
XM_039096601.1	Osbpl1a	oxysterol binding protein-like 1A (Osbpl1a), transcript variant X6, mRNA	6.89	5.25	3.2e-18
NM_001004084.3	RT1-Bb	RT1 class II, locus Bb (RT1-Bb), mRNA	420.95	-3.53	3.3e-18
XM_039104405.1	Dlgap4	DLG associated protein 4 (Dlgap4), transcript variant X5, mRNA	18.84	2.97	3.9e-18
XM_017597042.2	Slc6a4	solute carrier family 6 member 4 (Slc6a4), transcript variant X4, mRNA	5.81	6.89	4.3e-18
XM_039095346.1	Optn	optineurin (Optn), transcript variant X8, mRNA	11.43	6.57	4.4e-18
XM_006239146.3	Pla2g2a	phospholipase A2 group IIA (Pla2g2a), transcript variant X1, mRNA	124.93	3.1	4.6e-18
NM_001025411.1	Dnaja4	DnaJ heat shock protein family (Hsp40) member A4 (Dnaja4), mRNA	16.05	3.85	5.1e-18
XM_006257213.4	Sytl4	synaptotagmin-like 4 (Sytl4), transcript variant X1, mRNA	2.47	33.72	5.3e-18
NM_052800.1	Tk1	thymidine kinase 1 (Tk1), mRNA	10.55	6.9	5.3e-18
XM_008767933.3	Slfn4	schlafen family member 4 (Slfn4), transcript variant X1, mRNA	76.03	3.57	5.7e-18
NM_019381.2	Tmbim6	transmembrane BAX inhibitor motif containing 6 (Tmbim6), mRNA	219.91	2.89	5.7e-18
XM_226743.8	Naip5	NLR family, apoptosis inhibitory protein 5 (Naip5), transcript variant X1, mRNA	12.94	-4.09	6.5e-18
NM_001191792.1	Ubash3b	ubiquitin associated and SH3 domain containing, B (Ubash3b), mRNA	12.94	4.94	6.6e-18
XM_039098426.1	RT1-A2	RT1 class Ia, locus A2 (RT1-A2), transcript variant X2, mRNA	29.76	3.55	6.7e-18
NM_001024284.1	MGC105567	similar to cDNA sequence BC023105 (MGC105567), mRNA	17.82	3.88	7.2e-18
NM_001127456.1	Slc48a1	solute carrier family 48 member 1 (Slc48a1), mRNA	32.65	4.88	7.9e-18
NM_130424.3	Tmprss2	transmembrane serine protease 2 (Tmprss2), mRNA	1.43	37.44	8.4e-18
XM_039091736.1	Ahnak	AHNAK nucleoprotein (Ahnak), transcript variant X1, mRNA	12.59	-3.9	8.5e-18
XM_006255980.3	Prrt1	proline-rich transmembrane protein 1 (Prrt1), transcript variant X1, mRNA	35.85	-5.42	9e-18
XM_017601046.2	Rab27b	RAB27B, member RAS oncogene family (Rab27b), transcript variant X5, mRNA	9.28	4.84	9e-18
XM_039090944.1	Traf3ip3	TRAF3 interacting protein 3 (Traf3ip3), transcript variant X1, mRNA	46.05	-3.79	9e-18
XM_039085303.1	Ilk	integrin-linked kinase (Ilk), transcript variant X1, mRNA	17.31	4.71	9.1e-18
XM_008768398.2	Socs3	suppressor of cytokine signaling 3 (Socs3), transcript variant X1, mRNA	54.21	7.27	9.1e-18
XM_006247345.1	Ormdl3	ORMDL sphingolipid biosynthesis regulator 3 (Ormdl3), transcript variant X1, mRNA	17.27	3.24	1e-17
NM_001013238.1	Pttg1ip	PTTG1 interacting protein (Pttg1ip), mRNA	83.95	2.76	1.1e-17
NM_030867.2	Nfkbib	NFKB inhibitor beta (Nfkbib), mRNA	33	2.94	1.1e-17
XM_345156.8	Itga2	integrin subunit alpha 2 (Itga2), mRNA	10.17	3.55	1.1e-17
XM_006255031.4	Cd226	CD226 molecule (Cd226), transcript variant X6, mRNA	15.9	4.22	1.2e-17
NM_199382.2	Bpgm	bisphosphoglycerate mutase (Bpgm), mRNA	822.15	5.93	1.2e-17
XM_017591011.2	Gucy1a1	guanylate cyclase 1 soluble subunit alpha 1 (Gucy1a1), transcript variant X3, mRNA	6.25	4.9	1.2e-17
XM_017589615.2	Syt5	synaptotagmin 5 (Syt5), transcript variant X1, mRNA	11.7	5.05	1.3e-17
XM_039089110.1	Grk3	G protein-coupled receptor kinase 3 (Grk3), transcript variant X2, mRNA	8.4	-11.77	1.3e-17
NM_001107866.2	Loxl3	lysyl oxidase-like 3 (Loxl3), mRNA	2.75	12.76	1.3e-17
XM_039105612.1	Rbm38	RNA binding motif protein 38 (Rbm38), transcript variant X3, mRNA	29.49	4.15	1.3e-17
NM_001024339.1	Tuba8	tubulin, alpha 8 (Tuba8), mRNA	3.31	63.67	1.3e-17
XR_005487868.1	Vasp	vasodilator-stimulated phosphoprotein (Vasp), transcript variant X2, misc_RNA	56.49	5.87	1.4e-17
XM_008768765.2	Tigit	T cell immunoreceptor with Ig and ITIM domains (Tigit), mRNA	39.41	4.55	1.6e-17
NM_001170434.1	Lrrc32	leucine rich repeat containing 32 (Lrrc32), mRNA	1.07	56.12	1.6e-17
XM_039105880.1	Psmf1	proteasome inhibitor subunit 1 (Psmf1), transcript variant X3, mRNA	23.41	3.74	1.6e-17
NM_001008321.1	Gadd45b	growth arrest and DNA-damage-inducible, beta (Gadd45b), mRNA	18.01	4.37	1.7e-17
XM_039083953.1	Trem3	triggering receptor expressed on myeloid cells 3 (Trem3), transcript variant X3, mRNA	5.86	6.37	1.7e-17
XM_006233038.4	Tent5c	terminal nucleotidyltransferase 5C (Tent5c), transcript variant X2, mRNA	17.41	3.44	1.7e-17
NM_133290.3	Zfp36	zinc finger protein 36 (Zfp36), mRNA	345.41	3.34	1.8e-17
XM_039089505.1	Oasl2	2'-5' oligoadenylate synthetase-like 2 (Oasl2), transcript variant X2, mRNA	19.63	3.52	1.9e-17
NM_020086.1	Plvap	plasmalemma vesicle associated protein (Plvap), mRNA	10.32	-15.77	1.9e-17
XM_039105611.1	Rbm38	RNA binding motif protein 38 (Rbm38), transcript variant X2, mRNA	127.43	3.69	1.9e-17
XM_039081123.1	Dapk2	death-associated protein kinase 2 (Dapk2), transcript variant X4, mRNA	24.13	4.96	1.9e-17
NM_022953.2	Slit1	slit guidance ligand 1 (Slit1), mRNA	1.47	12.04	2e-17
XM_039104282.1	Ptpn1	protein tyrosine phosphatase, non-receptor type 1 (Ptpn1), transcript variant X2, mRNA	6.19	5.34	2e-17
NM_022523.1	Cd151	CD151 molecule (Raph blood group) (Cd151), mRNA	20.86	3.85	2.1e-17
XM_006235265.4	Bcl2l1	Bcl2-like 1 (Bcl2l1), transcript variant X5, mRNA	8.39	5.66	2.1e-17
NM_031598.3	Pla2g2a	phospholipase A2 group IIA (Pla2g2a), mRNA	1606.35	2.77	2.1e-17
XM_039085622.1	Tmem106a	transmembrane protein 106A (Tmem106a), transcript variant X1, mRNA	3.48	10.21	2.2e-17
NM_012548.2	Edn1	endothelin 1 (Edn1), mRNA	2.83	200.68	2.2e-17
XM_006249434.4	Rnf10	ring finger protein 10 (Rnf10), transcript variant X3, mRNA	202.15	4.8	2.4e-17
NM_152790.2	Carhsp1	calcium regulated heat stable protein 1 (Carhsp1), mRNA	32.14	4.17	2.5e-17
XM_006247631.4	Mrc2	mannose receptor, C type 2 (Mrc2), transcript variant X1, mRNA	2.15	-56.84	2.5e-17
NM_053407.3	Asah1	N-acylsphingosine amidohydrolase 1 (Asah1), mRNA	46.81	-3.98	2.5e-17
XM_039090021.1	LOC681341	similar to paired immunoglobin-like type 2 receptor beta (LOC681341), transcript variant X2, mRNA	12.25	-54.16	2.5e-17
XM_039095172.1	Ddx60	DEXD/H-box helicase 60 (Ddx60), transcript variant X10, mRNA	3.84	6.96	2.5e-17
XM_039090976.1	LOC498276	Fc gamma receptor II beta (LOC498276), transcript variant X1, mRNA	45.12	4.25	2.5e-17
XM_039083293.1	Ankrd44	ankyrin repeat domain 44 (Ankrd44), transcript variant X2, mRNA	25.38	-3.27	2.6e-17
NM_001271047.1	RGD1304694	similar to CG9646-PA (RGD1304694), mRNA	27.26	-4.81	2.6e-17
XM_006236388.4	Zyx	zyxin (Zyx), transcript variant X1, mRNA	157.64	3.29	2.7e-17
NM_053342.3	Cxxc4	CXXC finger protein 4 (Cxxc4), mRNA	6.98	3.28	3e-17
XM_006235704.4	Rbm38	RNA binding motif protein 38 (Rbm38), transcript variant X1, mRNA	484.9	4.21	3.1e-17
XM_006229570.4	Flna	filamin A (Flna), transcript variant X3, mRNA	12.23	7.81	3.1e-17
NM_001305212.1	Ybx2	Y box binding protein 2 (Ybx2), mRNA	17.91	4.21	3.2e-17
XM_039113146.1	Asap2	ArfGAP with SH3 domain, ankyrin repeat and PH domain 2 (Asap2), transcript variant X4, mRNA	2.6	7.6	3.2e-17
NM_017238.2	Vipr2	vasoactive intestinal peptide receptor 2 (Vipr2), mRNA	7.43	4.28	3.2e-17
XM_039090695.1	Slc26a9	solute carrier family 26 member 9 (Slc26a9), transcript variant X2, mRNA	1.62	15.13	3.3e-17
NM_013149.3	Ahr	aryl hydrocarbon receptor (Ahr), transcript variant 1, mRNA	3.91	5.88	3.5e-17
NM_001039017.1	Specc1	sperm antigen with calponin homology and coiled-coil domains 1 (Specc1), mRNA	51.94	5.88	3.7e-17
NR_046246.2	Rn28s	28S ribosomal RNA (Rn28s), ribosomal RNA	708.83	4.82	3.8e-17
NM_057203.1	Ccl22	C-C motif chemokine ligand 22 (Ccl22), mRNA	3.32	36	4.2e-17
XM_008760991.3	P2ry13	purinergic receptor P2Y13 (P2ry13), transcript variant X1, mRNA	7.84	3.76	4.5e-17
XM_017601572.2	Ly6g6c	lymphocyte antigen 6 family member G6C (Ly6g6c), transcript variant X1, mRNA	43.6	3.11	4.9e-17
XM_039099493.1	Fhl1	four and a half LIM domains 1 (Fhl1), transcript variant X7, mRNA	4.48	7.69	5.2e-17
XR_593549.3	LOC102552490	uncharacterized LOC102552490 (LOC102552490), transcript variant X1, ncRNA	11.99	4.41	5.3e-17
XM_006231601.4	Add3	adducin 3 (Add3), transcript variant X5, mRNA	122.22	-4.09	6.2e-17
XM_006230326.4	Rgs10	regulator of G-protein signaling 10 (Rgs10), transcript variant X3, mRNA	46.6	3.35	6.4e-17
XM_039088040.1	Il1rap	interleukin 1 receptor accessory protein (Il1rap), transcript variant X8, mRNA	8.2	3.38	6.5e-17
NM_001329893.1	LOC103689947	selenium-binding protein 1 (LOC103689947), mRNA	30.84	6.6	6.7e-17
NM_001007729.1	Pf4	platelet factor 4 (Pf4), mRNA	1902.58	3.01	6.7e-17
XM_006230213.4	Spn	sialophorin (Spn), transcript variant X1, mRNA	25.95	-7.12	6.9e-17
NM_001034934.1	Arid5a	AT-rich interaction domain 5A (Arid5a), mRNA	23.66	3.69	6.9e-17
XM_006253869.3	Serpinb6a	serpin family B member 6A (Serpinb6a), transcript variant X1, mRNA	39.76	3.02	7.1e-17
NM_001011559.1	Trpm2	transient receptor potential cation channel, subfamily M, member 2 (Trpm2), mRNA	11.08	3.32	7.2e-17
NM_031047.2	Jup	junction plakoglobin (Jup), mRNA	20.52	-7.31	7.3e-17
XM_006232407.4	P2ry12	purinergic receptor P2Y12 (P2ry12), transcript variant X1, mRNA	10.31	4.28	7.4e-17
NM_001106314.1	Ifitm1	interferon induced transmembrane protein 1 (Ifitm1), mRNA	157.96	3.17	8.4e-17
XR_005495958.1	LOC120098013	uncharacterized LOC120098013 (LOC120098013), transcript variant X2, ncRNA	151.9	5.69	8.4e-17
NM_001007742.1	Ubac1	UBA domain containing 1 (Ubac1), mRNA	26.63	5.2	9.6e-17
XM_001055795.7	Smarcc2	SWI/SNF related, matrix associated, actin dependent regulator of chromatin, subfamily c, member 2 (Smarcc2), transcript variant X4, mRNA	68.92	-2.81	9.7e-17
XM_039080098.1	LOC120093558	uncharacterized LOC120093558 (LOC120093558), mRNA	2.06	10.24	1e-16
XM_039095285.1	Nfil3	nuclear factor, interleukin 3 regulated (Nfil3), transcript variant X4, mRNA	14.18	4.71	1e-16
NM_212513.2	Lag3	lymphocyte activating 3 (Lag3), mRNA	18.77	4.47	1.1e-16
NM_053753.1	Clec4f	C-type lectin domain family 4, member F (Clec4f), mRNA	11.99	4.49	1.2e-16
NM_031011.3	Amd1	adenosylmethionine decarboxylase 1 (Amd1), mRNA	48.91	2.65	1.3e-16
NM_022505.2	Rhd	Rh blood group, D antigen (Rhd), mRNA	28.71	6.72	1.4e-16
XM_575359.6	Gatad1	GATA zinc finger domain containing 1 (Gatad1), transcript variant X1, mRNA	35.88	3.12	1.5e-16
NM_012649.2	Sdc4	syndecan 4 (Sdc4), mRNA	4.21	12.31	1.6e-16
NM_001108590.2	Epb42	erythrocyte membrane protein band 4.2 (Epb42), mRNA	27.41	5.81	1.6e-16
XM_006246179.3	Irgm	immunity-related GTPase M (Irgm), transcript variant X2, mRNA	10.18	4.85	1.7e-16
NM_012491.2	Add2	adducin 2 (Add2), transcript variant 2, mRNA	9.77	6.26	1.8e-16
NM_053847.2	Map3k8	mitogen-activated protein kinase kinase kinase 8 (Map3k8), mRNA	13.08	4.34	1.8e-16
NM_012837.1	Cst3	cystatin C (Cst3), mRNA	976.43	2.87	1.9e-16
XM_006249632.4	Serpinb11	serpin family B member 11 (Serpinb11), transcript variant X1, mRNA	8.43	4.83	1.9e-16
NM_012512.2	B2m	beta-2 microglobulin (B2m), mRNA	6315.67	2.45	2e-16
XM_006228980.3	Atf5	activating transcription factor 5 (Atf5), transcript variant X1, mRNA	32.45	2.68	2e-16
XM_006241609.4	Angpt1	angiopoietin 1 (Angpt1), transcript variant X1, mRNA	14.47	2.98	2e-16
NM_001109880.1	Add2	adducin 2 (Add2), transcript variant 1, mRNA	38.13	6.85	2.1e-16
NM_053484.2	Gas7	growth arrest specific 7 (Gas7), mRNA	5.99	4.25	2.4e-16
NM_013034.4	Slc6a4	solute carrier family 6 member 4 (Slc6a4), mRNA	5.05	251.3	2.4e-16
XM_006250411.4	Cnst	consortin, connexin sorting protein (Cnst), transcript variant X2, mRNA	2.89	5.89	2.5e-16
NM_053502.2	Abcg1	ATP binding cassette subfamily G member 1 (Abcg1), mRNA	36.37	-2.99	2.6e-16
XM_039108314.1	Hnrnpf	heterogeneous nuclear ribonucleoprotein F (Hnrnpf), transcript variant X3, mRNA	14.08	5.51	2.7e-16
NM_001109227.1	Tspan33	tetraspanin 33 (Tspan33), mRNA	18.7	6.17	2.8e-16
XM_039086953.1	Septin9	septin 9 (Septin9), transcript variant X5, mRNA	14.16	-6.74	2.9e-16
NM_001009683.1	Tor3a	torsin family 3, member A (Tor3a), mRNA	6.65	6.39	2.9e-16
XM_039086461.1	Tnip1	TNFAIP3 interacting protein 1 (Tnip1), transcript variant X6, mRNA	7.22	7.69	2.9e-16
NM_001191933.1	Opn3	opsin 3 (Opn3), mRNA	8.02	5.85	3e-16
NM_001105210.1	Irag1	inositol 1,4,5-triphosphate receptor associated 1 (Irag1), transcript variant 2, mRNA	5.33	11.83	3.2e-16
NM_031971.2	Hspa1b	heat shock protein family A (Hsp70) member 1B (Hspa1b), mRNA	5.11	8.42	3.3e-16
XM_039094186.1	Dnah1	dynein, axonemal, heavy chain 1 (Dnah1), transcript variant X8, mRNA	0.63	13.13	3.3e-16
XR_005487426.1	LOC108351555	uncharacterized LOC108351555 (LOC108351555), ncRNA	5.3	-11	3.4e-16
NM_001106694.1	Pink1	PTEN induced kinase 1 (Pink1), mRNA; nuclear gene for mitochondrial product	48.56	3.16	3.5e-16
XM_039089385.1	Amz1	archaelysin family metallopeptidase 1 (Amz1), transcript variant X1, mRNA	9.59	-21.73	3.6e-16
XM_039086614.1	Nlk	nemo like kinase (Nlk), transcript variant X1, mRNA	18.79	4.55	3.7e-16
NM_001008847.2	RT1-Da	RT1 class II, locus Da (RT1-Da), mRNA	444.49	-3.35	3.9e-16
NM_032612.3	Stat1	signal transducer and activator of transcription 1 (Stat1), transcript variant alpha, mRNA	38.09	2.66	3.9e-16
NM_001025132.1	Cnih2	cornichon family AMPA receptor auxiliary protein 2 (Cnih2), mRNA	8.46	8.9	4.1e-16
NM_019169.2	Snca	synuclein alpha (Snca), mRNA	72.88	6.51	4.1e-16
NM_001009353.1	Pla2g7	phospholipase A2 group VII (Pla2g7), mRNA	33.2	-10.62	4.2e-16
XM_008758961.2	Ppp1r12c	protein phosphatase 1, regulatory subunit 12C (Ppp1r12c), transcript variant X1, mRNA	19.25	2.63	4.3e-16
XM_039102446.1	Fnbp1l	formin binding protein 1-like (Fnbp1l), transcript variant X4, mRNA	2.39	8.81	4.7e-16
NM_019250.2	Ralgds	ral guanine nucleotide dissociation stimulator (Ralgds), mRNA	3.37	19.84	4.7e-16
NM_001167664.1	Cd300lb	CD300 molecule-like family member b (Cd300lb), mRNA	15.08	-67.89	4.7e-16
NM_001242627.1	Zfpm1	zinc finger protein, multitype 1 (Zfpm1), mRNA	22.71	2.78	5e-16
NM_001108475.2	Vasp	vasodilator-stimulated phosphoprotein (Vasp), mRNA	23.4	3.79	5.1e-16
XM_039098153.1	Nlrc5	NLR family, CARD domain containing 5 (Nlrc5), transcript variant X4, mRNA	10.29	3.1	5.3e-16
NM_023022.2	Rhag	Rh-associated glycoprotein (Rhag), mRNA	12.88	3.61	5.3e-16
NM_053867.2	Tpt1	tumor protein, translationally-controlled 1 (Tpt1), mRNA	3997.97	3.3	5.4e-16
NM_001134744.1	Agpat5	1-acylglycerol-3-phosphate O-acyltransferase 5 (Agpat5), mRNA	6.68	4.9	5.9e-16
NM_001134884.1	Scube1	signal peptide, CUB domain and EGF like domain containing 1 (Scube1), mRNA	0.81	123.83	6.1e-16
NM_019132.3	Gnas	GNAS complex locus (Gnas), transcript variant 3, mRNA	46.88	3.02	6.4e-16
NM_013132.2	Anxa5	annexin A5 (Anxa5), mRNA	38.16	-7.86	6.5e-16
XM_006241132.4	Pram1	PML-RARA regulated adaptor molecule 1 (Pram1), transcript variant X3, mRNA	44.48	3.75	6.6e-16
NM_001110099.1	Ret	ret proto-oncogene (Ret), transcript variant 2, mRNA	18.68	2.63	6.8e-16
NM_001277272.1	Haus7	HAUS augmin-like complex, subunit 7 (Haus7), mRNA	10.06	5.99	7.2e-16
NM_017102.2	Slc2a3	solute carrier family 2 member 3 (Slc2a3), mRNA	9.24	8.84	7.4e-16
XM_039099385.1	LOC100362709	proteasome activator complex subunit 2-like (LOC100362709), mRNA	75.59	3.16	7.7e-16
NM_001107115.1	Arhgef18	Rho/Rac guanine nucleotide exchange factor 18 (Arhgef18), mRNA	40.12	-3.12	8.4e-16
NM_001106458.2	Bcas2	BCAS2, pre-mRNA processing factor (Bcas2), mRNA	177.48	4.55	9.1e-16
XM_039098749.1	Arid5b	AT-rich interaction domain 5B (Arid5b), transcript variant X5, mRNA	8.57	2.79	1e-15
XM_006242848.4	Ubash3b	ubiquitin associated and SH3 domain containing, B (Ubash3b), transcript variant X1, mRNA	8.42	3.22	1e-15
NM_053546.2	Angpt1	angiopoietin 1 (Angpt1), mRNA	20.59	3.02	1.1e-15
XM_039094561.1	Tacc1	transforming, acidic coiled-coil containing protein 1 (Tacc1), transcript variant X5, mRNA	13.55	3.43	1.1e-15
NM_001127600.1	Aida	axin interactor, dorsalization associated (Aida), mRNA	22.91	3.05	1.2e-15
XM_017596795.2	Il18rap	interleukin 18 receptor accessory protein (Il18rap), transcript variant X2, mRNA	4.81	3.91	1.2e-15
XM_006241126.3	Marchf2	membrane associated ring-CH-type finger 2 (Marchf2), transcript variant X2, mRNA	18.18	4.05	1.3e-15
XM_006255244.2	Prdx2	peroxiredoxin 2 (Prdx2), transcript variant X1, mRNA	21.8	4.84	1.3e-15
NM_001105936.1	Iscu	iron-sulfur cluster assembly enzyme (Iscu), mRNA	47.74	4.06	1.4e-15
NM_001108232.2	Asb1	ankyrin repeat and SOCS box-containing 1 (Asb1), mRNA	6.68	9.26	1.4e-15
XM_039104194.1	Cdc25b	cell division cycle 25B (Cdc25b), transcript variant X2, mRNA	33.15	6.6	1.4e-15
NM_001107043.1	Tbx21	T-box transcription factor 21 (Tbx21), mRNA	49.37	3.33	1.4e-15
NM_001007145.1	Ctnna1	catenin alpha 1 (Ctnna1), mRNA	14.27	2.92	1.6e-15
XM_039101605.1	Anxa1	annexin A1 (Anxa1), transcript variant X1, mRNA	10.54	5.75	1.7e-15
XM_039090430.1	Pik3c2b	phosphatidylinositol-4-phosphate 3-kinase, catalytic subunit type 2 beta (Pik3c2b), transcript variant X3, mRNA	8.74	-4.47	1.7e-15
XM_008760603.2	Ell2	elongation factor for RNA polymerase II 2 (Ell2), transcript variant X2, mRNA	8.96	4.38	1.7e-15
NM_134366.1	Rac1	Rac family small GTPase 1 (Rac1), mRNA	169.33	2.64	1.8e-15
NM_001126083.1	Cks2	CDC28 protein kinase regulatory subunit 2 (Cks2), mRNA	35.01	4.97	1.8e-15
NM_019197.1	Serpine2	serpin family E member 2 (Serpine2), mRNA	2.07	35.78	1.9e-15
XR_005503128.1	LOC120093067	28S ribosomal RNA (LOC120093067), rRNA	948.14	4.68	2e-15
NM_012506.1	Atp1a3	ATPase Na+/K+ transporting subunit alpha 3 (Atp1a3), mRNA	13.12	-12.85	2e-15
NM_012968.1	Il1rap	interleukin 1 receptor accessory protein (Il1rap), transcript variant 1, mRNA	11.41	5.39	2.1e-15
XM_039096605.1	Osbpl1a	oxysterol binding protein-like 1A (Osbpl1a), transcript variant X10, mRNA	27.52	2.76	2.1e-15
XM_039084035.1	Adgre4	adhesion G protein-coupled receptor E4 (Adgre4), transcript variant X2, mRNA	9.66	-22.34	2.1e-15
NM_012814.1	Cox6a1	cytochrome c oxidase subunit 6A1 (Cox6a1), mRNA; nuclear gene for mitochondrial product	114.45	2.96	2.1e-15
XM_006245564.4	LOC102549694	protein NYNRIN-like (LOC102549694), mRNA	6.58	5.35	2.2e-15
XM_039097646.1	Irf8	interferon regulatory factor 8 (Irf8), transcript variant X2, mRNA	7.29	3.61	2.2e-15
NM_001044283.1	Snx3	sorting nexin 3 (Snx3), mRNA	218.89	2.87	2.3e-15
XM_006255737.4	Irf8	interferon regulatory factor 8 (Irf8), transcript variant X1, mRNA	72.35	3.22	2.3e-15
XM_039085110.1	Galnt10	polypeptide N-acetylgalactosaminyltransferase 10 (Galnt10), transcript variant X6, mRNA	8.53	5.37	2.5e-15
XM_341541.8	RGD1564129	similar to hypothetical protein 4930474N05 (RGD1564129), transcript variant X1, mRNA	34.37	3.22	2.8e-15
XM_039086630.1	Zfp652	zinc finger protein 652 (Zfp652), transcript variant X4, mRNA	17.27	-2.81	3e-15
NM_001382488.1	Ksr1	kinase suppressor of ras 1 (Ksr1), mRNA	3.96	5.63	3.1e-15
XR_005490073.1	LOC120095053	uncharacterized LOC120095053 (LOC120095053), transcript variant X2, ncRNA	13.28	8.2	3.2e-15
XM_221132.10	Ube2o	ubiquitin-conjugating enzyme E2O (Ube2o), transcript variant X1, mRNA	37.83	4.66	3.3e-15
XR_005497282.1	Tnfaip3	TNF alpha induced protein 3 (Tnfaip3), transcript variant X2, misc_RNA	1.58	9.63	3.5e-15
NM_031986.2	Sdcbp	syndecan binding protein (Sdcbp), mRNA	36.83	2.63	3.6e-15
NM_001076793.2	Lilra5	leukocyte immunoglobulin like receptor A5 (Lilra5), mRNA	9.59	-244.15	3.6e-15
XM_017600918.2	Stard4	StAR-related lipid transfer domain containing 4 (Stard4), transcript variant X1, mRNA	12.41	-3.9	3.7e-15
NM_001108866.1	Abhd4	abhydrolase domain containing 4, N-acyl phospholipase B (Abhd4), mRNA	25.29	3.56	3.8e-15
NM_017305.2	Gclm	glutamate cysteine ligase, modifier subunit (Gclm), mRNA	23.44	4.91	3.9e-15
NM_001107852.2	Plxna4	plexin A4 (Plxna4), mRNA	0.32	25.55	4e-15
NM_001127449.1	Actg1	actin, gamma 1 (Actg1), mRNA	583.24	2.92	4.1e-15
XM_039082085.1	Nrgn	neurogranin (Nrgn), transcript variant X1, mRNA	33.95	3.07	4.1e-15
XM_213312.8	Fam183a	family with sequence similarity 183 member A (Fam183a), mRNA	4.3	30.3	4.2e-15
XM_039087537.1	Sgsh	N-sulfoglucosamine sulfohydrolase (Sgsh), transcript variant X1, mRNA	5.94	-14.5	4.3e-15
NM_017025.2	Ldha	lactate dehydrogenase A (Ldha), mRNA	152.95	2.72	4.3e-15
XM_006234379.4	Lnpk	lunapark, ER junction formation factor (Lnpk), transcript variant X4, mRNA	1.51	7.54	4.7e-15
XM_006238618.4	Tal1	TAL bHLH transcription factor 1, erythroid differentiation factor (Tal1), transcript variant X6, mRNA	20.4	4.14	5.1e-15
XM_039096162.1	Hist1h2ac	histone cluster 1 H2A family member C (Hist1h2ac), mRNA	12.62	7.71	5.1e-15
NM_001013931.2	Fam214b	family with sequence similarity 214, member B (Fam214b), mRNA	7.9	6.51	5.4e-15
XM_002728681.6	Vstm1	V-set and transmembrane domain containing 1 (Vstm1), transcript variant X1, mRNA	10.88	-6.5	5.4e-15
XM_017600633.2	Plxdc2	plexin domain containing 2 (Plxdc2), transcript variant X7, mRNA	3.3	-6.2	5.6e-15
XM_039092964.1	Bnip3l	BCL2 interacting protein 3 like (Bnip3l), transcript variant X2, mRNA	14.17	7.42	5.7e-15
NM_001276721.1	Prkcq	protein kinase C, theta (Prkcq), mRNA	55.24	2.63	5.7e-15
NM_001005890.2	Clec4a1	C-type lectin domain family 4, member A1 (Clec4a1), mRNA	67.99	-9.49	5.9e-15
NM_001167840.2	Il1rap	interleukin 1 receptor accessory protein (Il1rap), transcript variant 2, mRNA	4.9	8.37	5.9e-15
XM_008769495.3	Serpinb2	serpin family B member 2 (Serpinb2), transcript variant X2, mRNA	0.98	76.02	6.6e-15
NM_031152.3	Rab11a	RAB11a, member RAS oncogene family (Rab11a), mRNA	48.08	2.7	6.7e-15
XM_006233338.3	Ube2d3	ubiquitin-conjugating enzyme E2D 3 (Ube2d3), transcript variant X6, mRNA	3.9	5.05	6.8e-15
XR_005486544.1	Cela1	chymotrypsin like elastase 1 (Cela1), transcript variant X1, misc_RNA	8.94	11.61	6.9e-15
NM_001032285.1	Prrt1	proline-rich transmembrane protein 1 (Prrt1), mRNA	23.73	-5.6	6.9e-15
NM_001106299.1	Ahsp	alpha hemoglobin stabilizing protein (Ahsp), mRNA	81.35	6.18	6.9e-15
XM_006235063.4	Smox	spermine oxidase (Smox), transcript variant X1, mRNA	10.85	4.26	7.7e-15
NM_001270688.1	Fxyd5	FXYD domain-containing ion transport regulator 5 (Fxyd5), transcript variant 2, mRNA	686.19	-2.64	7.7e-15
XM_008772264.3	Adgrg1	adhesion G protein-coupled receptor G1 (Adgrg1), transcript variant X1, mRNA	2.11	12.24	8.8e-15
XM_039081318.1	Fyco1	FYVE and coiled-coil domain autophagy adaptor 1 (Fyco1), transcript variant X1, mRNA	20.83	2.58	9.1e-15
NM_031237.1	Ube2d3	ubiquitin-conjugating enzyme E2D 3 (Ube2d3), mRNA	215.95	2.55	9.1e-15
XM_039088249.1	Itsn1	intersectin 1 (Itsn1), transcript variant X4, mRNA	24.77	5.27	9.3e-15
XM_006243965.4	Rtp3	receptor (chemosensory) transporter protein 3 (Rtp3), transcript variant X1, mRNA	3.78	12.55	9.3e-15
XM_039088119.1	Mylk	myosin light chain kinase (Mylk), transcript variant X1, mRNA	1.66	6.72	9.3e-15
NM_013073.3	Pcmt1	protein-L-isoaspartate (D-aspartate) O-methyltransferase 1 (Pcmt1), mRNA	9.82	3.5	1e-14
NM_057209.2	Mylk2	myosin light chain kinase 2 (Mylk2), mRNA	5.7	8.31	1.1e-14
NM_012797.2	Id1	inhibitor of DNA binding 1, HLH protein (Id1), mRNA	20.17	6.3	1.1e-14
NM_001001969.1	Ly6g6c	lymphocyte antigen 6 family member G6C (Ly6g6c), mRNA	62.35	3.12	1.1e-14
XM_006257172.4	P2ry10	P2Y receptor family member 10 (P2ry10), transcript variant X2, mRNA	52.19	-3.17	1.1e-14
NR_046237.2	Rn18s	18S ribosomal RNA (Rn18s), ribosomal RNA	206.21	3.76	1.2e-14
XM_039102034.1	Pcmt1	protein-L-isoaspartate (D-aspartate) O-methyltransferase 1 (Pcmt1), transcript variant X4, mRNA	9.14	3.61	1.2e-14
XM_039107293.1	Bpgm	bisphosphoglycerate mutase (Bpgm), transcript variant X1, mRNA	175.83	5.45	1.3e-14
XM_039084034.1	Adgre4	adhesion G protein-coupled receptor E4 (Adgre4), transcript variant X1, mRNA	26.87	-32.95	1.3e-14
NM_001017485.1	Fam220a	family with sequence similarity 220, member A (Fam220a), mRNA	22.46	3.76	1.4e-14
NM_001271089.2	Slc3a2	solute carrier family 3 member 2 (Slc3a2), transcript variant 2, mRNA	42.81	3.02	1.4e-14
XM_006247346.1	Ormdl3	ORMDL sphingolipid biosynthesis regulator 3 (Ormdl3), transcript variant X2, mRNA	11.65	3.47	1.5e-14
NM_001008518.2	MGC105649	hypothetical LOC302884 (MGC105649), mRNA	119.79	3.25	1.5e-14
XM_006256930.4	Sh3kbp1	SH3 domain-containing kinase-binding protein 1 (Sh3kbp1), transcript variant X9, mRNA	8.99	4.32	1.5e-14
XM_039098854.1	Tnfaip3	TNF alpha induced protein 3 (Tnfaip3), transcript variant X6, mRNA	8.91	5.19	1.5e-14
NM_053761.1	Zyx	zyxin (Zyx), mRNA	120.17	2.82	1.6e-14
XM_006234378.4	Lnpk	lunapark, ER junction formation factor (Lnpk), transcript variant X2, mRNA	4.12	5.86	1.6e-14
XM_006230530.3	Ifitm1	interferon induced transmembrane protein 1 (Ifitm1), transcript variant X1, mRNA	71.31	3.04	1.6e-14
NM_001014140.1	Prxl2a	peroxiredoxin like 2A (Prxl2a), mRNA	18.32	5.09	1.7e-14
XR_590162.3	Siglec8	sialic acid binding Ig-like lectin 8 (Siglec8), transcript variant X2, misc_RNA	16.73	4.39	1.7e-14
NM_001012030.1	Zfp281	zinc finger protein 281 (Zfp281), mRNA	9.78	2.9	1.7e-14
XM_006254215.4	Sfmbt2	Scm-like with four mbt domains 2 (Sfmbt2), transcript variant X4, mRNA	1.5	11.89	1.8e-14
XM_003752020.5	LOC681355	similar to potassium channel tetramerisation domain containing 12b (LOC681355), transcript variant X2, mRNA	2.13	-41.31	1.8e-14
NM_001031638.1	Cd68	Cd68 molecule (Cd68), mRNA	284.67	-10.2	1.8e-14
XM_006253295.4	Adgra2	adhesion G protein-coupled receptor A2 (Adgra2), transcript variant X3, mRNA	3.92	3.98	1.9e-14
NM_017073.3	Glul	glutamate-ammonia ligase (Glul), mRNA	344.09	3.56	1.9e-14
XM_039112265.1	Daam1	dishevelled associated activator of morphogenesis 1 (Daam1), transcript variant X6, mRNA	5.11	4.36	2.2e-14
XM_008763374.3	Dusp16	dual specificity phosphatase 16 (Dusp16), transcript variant X1, mRNA	6.27	3.43	2.2e-14
XM_578498.7	Nipal3	NIPA-like domain containing 3 (Nipal3), transcript variant X1, mRNA	11.93	2.61	2.3e-14
NM_012848.2	Fth1	ferritin heavy chain 1 (Fth1), mRNA	7296.63	2.53	2.4e-14
XM_039092921.1	Cracd	capping protein inhibiting regulator of actin dynamics (Cracd), transcript variant X3, mRNA	4.23	5.23	2.5e-14
NM_001105837.1	Eif1	eukaryotic translation initiation factor 1 (Eif1), mRNA	226.21	2.45	2.5e-14
XM_008767486.2	Mgrn1	mahogunin ring finger 1 (Mgrn1), transcript variant X8, mRNA	22.06	4.17	2.5e-14
NM_176077.3	G6pc3	glucose 6 phosphatase catalytic subunit 3 (G6pc3), mRNA	16.46	3.56	2.6e-14
NM_001014044.1	Tifa	TRAF-interacting protein with forkhead-associated domain (Tifa), mRNA	15.11	4.06	2.6e-14
NM_001007720.1	Gorasp2	golgi reassembly stacking protein 2 (Gorasp2), mRNA	98.02	2.41	2.7e-14
NM_012589.2	Il6	interleukin 6 (Il6), mRNA	2.98	56.59	2.8e-14
XR_592706.3	LOC102554074	uncharacterized LOC102554074 (LOC102554074), transcript variant X2, ncRNA	15.88	4.7	2.8e-14
XR_005498479.1	LOC100911253	uncharacterized LOC100911253 (LOC100911253), transcript variant X13, ncRNA	7.45	-17.82	2.8e-14
NM_001106226.2	Bicra	BRD4 interacting chromatin remodeling complex associated protein (Bicra), mRNA	27.66	-4.08	2.8e-14
XR_001841612.2	LOC108348389	uncharacterized LOC108348389 (LOC108348389), ncRNA	3.93	-59.63	2.9e-14
XM_039107690.1	Tspan9	tetraspanin 9 (Tspan9), transcript variant X7, mRNA	7.88	9.38	3e-14
XM_039101582.1	Map3k1	mitogen-activated protein kinase kinase kinase 1 (Map3k1), transcript variant X1, mRNA	21.21	-2.71	3.1e-14
XM_039080069.1	Btbd11	BTB domain containing 11 (Btbd11), transcript variant X1, mRNA	1.93	6.18	3.2e-14
XM_006238058.4	Coro2a	coronin 2A (Coro2a), transcript variant X3, mRNA	6.54	-7.82	3.3e-14
XR_005496626.1	N4bp1	Nedd4 binding protein 1 (N4bp1), transcript variant X1, misc_RNA	6.33	7.87	3.4e-14
XM_006242383.4	Itgb7	integrin subunit beta 7 (Itgb7), transcript variant X1, mRNA	58.22	-3.99	3.5e-14
NM_022706.2	Gabarapl2	GABA type A receptor associated protein like 2 (Gabarapl2), mRNA	75.87	3.96	3.7e-14
XM_039080733.1	Atp2c1	ATPase secretory pathway Ca2+ transporting 1 (Atp2c1), transcript variant X6, mRNA	7.86	5.09	4.2e-14
XM_039082481.1	LOC120094192	gamma-secretase subunit APH-1B (LOC120094192), transcript variant X2, mRNA	13.75	4.5	4.4e-14
XM_039090026.1	RGD1563400	similar to paired immunoglobin-like type 2 receptor beta (RGD1563400), transcript variant X3, mRNA	15.45	-11.55	4.5e-14
NM_031056.1	Mmp14	matrix metallopeptidase 14 (Mmp14), mRNA	1.72	193.15	4.6e-14
XM_039110270.1	Alg6	ALG6, alpha-1,3-glucosyltransferase (Alg6), transcript variant X3, mRNA	13.62	3.55	4.6e-14
NM_133540.1	Nkg7	natural killer cell granule protein 7 (Nkg7), mRNA	96.8	3.09	4.8e-14
NM_001097581.1	Sav1	salvador family WW domain containing protein 1 (Sav1), mRNA	16.41	3.01	4.9e-14
NM_001009419.1	Cmas	cytidine monophosphate N-acetylneuraminic acid synthetase (Cmas), mRNA	28.49	3.03	5e-14
NM_001013049.2	Smtn	smoothelin (Smtn), mRNA	3.46	8.67	5.4e-14
XM_039113366.1	LOC120103612	MLV-related proviral Env polyprotein-like (LOC120103612), transcript variant X1, mRNA	2.75	6.9	5.6e-14
XM_039081522.1	Myo5c	myosin VC (Myo5c), transcript variant X4, mRNA	6.74	6.24	5.7e-14
XM_039111890.1	Nampt	nicotinamide phosphoribosyltransferase (Nampt), transcript variant X1, mRNA	6.9	3.59	5.9e-14
NM_001271050.1	Cnnm4	cyclin and CBS domain divalent metal cation transport mediator 4 (Cnnm4), mRNA	15.88	-3.24	6.2e-14
XM_039089068.1	Oas1b	2-5 oligoadenylate synthetase 1B (Oas1b), transcript variant X1, mRNA	3.82	13.49	6.2e-14
XM_039104654.1	Ptprj	protein tyrosine phosphatase, receptor type, J (Ptprj), transcript variant X2, mRNA	6.08	3.82	6.2e-14
XM_039079610.1	Parvb	parvin, beta (Parvb), transcript variant X1, mRNA	7.64	5.23	6.3e-14
XM_039099145.1	Rab44	RAB44, member RAS oncogene family (Rab44), transcript variant X3, mRNA	1.43	14.77	6.4e-14
NM_001008278.2	Cdkn2aipnl	CDKN2A interacting protein N-terminal like (Cdkn2aipnl), mRNA	37.61	-3.47	6.5e-14
NM_001195503.1	Stmp1	short transmembrane mitochondrial protein 1 (Stmp1), transcript variant 1, mRNA	217.19	2.63	6.6e-14
XM_006227988.4	Fpr1	formyl peptide receptor 1 (Fpr1), transcript variant X1, mRNA	8.07	6.51	7.1e-14
NM_001106397.1	Mical1	microtubule associated monooxygenase, calponin and LIM domain containing 1 (Mical1), mRNA	35.7	-2.97	7.3e-14
NM_001108496.2	Stim1	stromal interaction molecule 1 (Stim1), mRNA	42.85	2.52	7.7e-14
NM_012886.2	Timp3	TIMP metallopeptidase inhibitor 3 (Timp3), mRNA	2.56	36.41	8e-14
XM_008772572.3	Mlkl	mixed lineage kinase domain like pseudokinase (Mlkl), transcript variant X2, mRNA	8.88	4.93	8.4e-14
XM_006242918.4	C2cd2l	C2CD2-like (C2cd2l), transcript variant X2, mRNA	10.04	3.04	8.5e-14
NM_001004233.1	Mkrn1	makorin ring finger protein 1 (Mkrn1), mRNA	61.28	4.3	8.8e-14
NM_001173974.1	R3hdm4	R3H domain containing 4 (R3hdm4), mRNA	120.69	2.83	9.3e-14
NM_022597.2	Ctsb	cathepsin B (Ctsb), mRNA	643.11	3.46	9.6e-14
XM_039105635.1	Isg20	interferon stimulated exonuclease gene 20 (Isg20), transcript variant X2, mRNA	3.39	7.86	9.8e-14
XM_006256391.4	Lims1	LIM zinc finger domain containing 1 (Lims1), transcript variant X9, mRNA	37.31	2.73	1e-13
XM_006235213.4	Cst7	cystatin F (Cst7), transcript variant X1, mRNA	36.03	3.2	1e-13
NM_001014220.1	Sp100	SP100 nuclear antigen (Sp100), mRNA	17.58	2.96	1e-13
NM_001009680.1	Oas1i	2 ' -5 ' oligoadenylate synthetase 1I (Oas1i), mRNA	4.8	8.19	1e-13
XM_008764961.3	Ppp2r5c	protein phosphatase 2, regulatory subunit B', gamma (Ppp2r5c), transcript variant X4, mRNA	26.15	-4.27	1e-13
NM_134352.1	Plaur	plasminogen activator, urokinase receptor (Plaur), transcript variant 1, mRNA	15.04	5.54	1.1e-13
XM_039085279.1	Lgals5	galectin 5 (Lgals5), transcript variant X1, mRNA	38.61	6.93	1.2e-13
NM_001033670.1	Bcl2l1	Bcl2-like 1 (Bcl2l1), transcript variant 3, mRNA	23.75	4.18	1.2e-13
XM_017595042.2	Gipc3	GIPC PDZ domain containing family, member 3 (Gipc3), transcript variant X1, mRNA	1.39	11.19	1.2e-13
XM_039112993.1	Actn1	actinin, alpha 1 (Actn1), transcript variant X2, mRNA	6.26	32.54	1.3e-13
NR_102352.1	LOC100910973	uncharacterized LOC100910973 (LOC100910973), transcript variant 2, long non-coding RNA	1536.98	2.6	1.3e-13
XM_006236486.4	Snx10	sorting nexin 10 (Snx10), transcript variant X1, mRNA	16.64	3.64	1.3e-13
NM_001025682.1	Cdr2	cerebellar degeneration-related protein 2 (Cdr2), mRNA	62.32	5.4	1.4e-13
XM_006250315.4	Olr1584	olfactory receptor 1584 (Olr1584), transcript variant X1, mRNA	2.39	-16.52	1.4e-13
NM_001079689.2	Chit1	chitinase 1 (Chit1), transcript variant bChiV_5, mRNA	1.25	45.3	1.4e-13
NM_001270803.1	Ciita	class II, major histocompatibility complex, transactivator (Ciita), transcript variant 2, mRNA	15.17	-4.4	1.4e-13
NM_012577.2	Gstp1	glutathione S-transferase pi 1 (Gstp1), mRNA	66.72	2.78	1.5e-13
NM_012778.2	Aqp1	aquaporin 1 (Aqp1), mRNA	26.13	5.96	1.5e-13
XM_006245834.4	Nlrc3	NLR family, CARD domain containing 3 (Nlrc3), mRNA	12.6	-3.72	1.5e-13
XM_006231021.4	Cd6	Cd6 molecule (Cd6), transcript variant X1, mRNA	25.41	-4.96	1.5e-13
NM_001108191.1	Ccrl2	C-C motif chemokine receptor like 2 (Ccrl2), mRNA	9.82	4.62	1.5e-13
XM_039084551.1	Il18rap	interleukin 18 receptor accessory protein (Il18rap), transcript variant X6, mRNA	3.16	17.15	1.5e-13
NM_001008306.1	Calhm2	calcium homeostasis modulator family member 2 (Calhm2), mRNA	15.44	-7.43	1.6e-13
XM_017592487.2	Cald1	caldesmon 1 (Cald1), transcript variant X3, mRNA	3.33	46.47	1.7e-13
XM_039112406.1	Wars1	tryptophanyl-tRNA synthetase 1 (Wars1), transcript variant X4, mRNA	31.79	3.66	1.7e-13
XM_002729871.5	Endod1	endonuclease domain containing 1 (Endod1), mRNA	11.15	2.8	1.7e-13
NM_001006997.1	Smpd1	sphingomyelin phosphodiesterase 1 (Smpd1), mRNA	41.35	2.76	1.8e-13
XM_039096023.1	Aoah	acyloxyacyl hydrolase (Aoah), transcript variant X15, mRNA	17.35	2.86	1.8e-13
NM_013079.2	Asns	asparagine synthetase (glutamine-hydrolyzing) (Asns), mRNA	14.63	14.44	1.9e-13
NM_001108439.1	Large1	LARGE xylosyl- and glucuronyltransferase 1 (Large1), mRNA	5.71	3.76	1.9e-13
NM_031795.2	Ugcg	UDP-glucose ceramide glucosyltransferase (Ugcg), mRNA	31.29	2.55	1.9e-13
NM_017148.2	Csrp1	cysteine and glycine-rich protein 1 (Csrp1), mRNA	27.9	3.19	1.9e-13
NM_175761.2	Hsp90aa1	heat shock protein 90 alpha family class A member 1 (Hsp90aa1), mRNA	110.63	3.39	1.9e-13
NM_001389213.1	Cdc25b	cell division cycle 25B (Cdc25b), transcript variant 2, mRNA	110.39	5.21	1.9e-13
XM_006235066.3	Rassf2	Ras association domain family member 2 (Rassf2), transcript variant X1, mRNA	18.78	-2.77	2e-13
XM_006232669.3	Pbxip1	PBX homeobox interacting protein 1 (Pbxip1), transcript variant X5, mRNA	53.21	-2.68	2.1e-13
XR_005493684.1	Tpt1	tumor protein, translationally-controlled 1 (Tpt1), transcript variant X1, misc_RNA	951.98	3.56	2.2e-13
XM_039107080.1	Cd4	Cd4 molecule (Cd4), transcript variant X2, mRNA	13.11	-11.05	2.2e-13
XM_039102447.1	Fnbp1l	formin binding protein 1-like (Fnbp1l), transcript variant X5, mRNA	4.23	4.96	2.2e-13
XM_039112403.1	Wars1	tryptophanyl-tRNA synthetase 1 (Wars1), transcript variant X1, mRNA	2.03	26.14	2.6e-13
XM_017589346.2	Lilrb3l	leukocyte immunoglobulin-like receptor, subfamily B (with TM and ITIM domains), member 3-like (Lilrb3l), transcript variant X1, mRNA	39.18	-75.01	2.7e-13
XR_005490589.1	LOC120095223	uncharacterized LOC120095223 (LOC120095223), transcript variant X2, ncRNA	4.85	11.51	2.7e-13
XM_006231503.4	Nfkb2	nuclear factor kappa B subunit 2 (Nfkb2), transcript variant X1, mRNA	7.2	2.85	2.7e-13
XM_006234710.4	Slc12a6	solute carrier family 12, member 6 (Slc12a6), transcript variant X1, mRNA	23.34	-3.1	2.9e-13
XM_006241910.4	Parp10	poly (ADP-ribose) polymerase family, member 10 (Parp10), transcript variant X1, mRNA	11.98	2.76	3e-13
XM_039097537.1	Cmtm3	CKLF-like MARVEL transmembrane domain containing 3 (Cmtm3), transcript variant X2, mRNA	6.34	8.15	3e-13
NM_001166403.1	RT1-T24-3	RT1 class I, locus T24, gene 3 (RT1-T24-3), mRNA	44.3	2.34	3e-13
NM_017353.2	Slc7a5	solute carrier family 7 member 5 (Slc7a5), mRNA	15.33	2.6	3.1e-13
NM_138880.3	Ifng	interferon gamma (Ifng), mRNA	13.49	20.18	3.1e-13
XM_006252115.4	Spata13	spermatogenesis associated 13 (Spata13), transcript variant X4, mRNA	3.36	5.53	3.1e-13
XR_351582.4	LOC102555118	uncharacterized LOC102555118 (LOC102555118), ncRNA	4.65	4.15	3.1e-13
NM_031548.2	Scnn1a	sodium channel epithelial 1 subunit alpha (Scnn1a), mRNA	3.18	-25.02	3.2e-13
XM_039103156.1	Il31ra	interleukin 31 receptor A (Il31ra), transcript variant X1, mRNA	1.22	-51.64	3.2e-13
XM_039090524.1	Bcl3	BCL3, transcription coactivator (Bcl3), transcript variant X3, mRNA	4.36	12.83	3.2e-13
XM_008771146.3	Uba52	ubiquitin A-52 residue ribosomal protein fusion product 1 (Uba52), transcript variant X4, mRNA	82.42	3.08	3.4e-13
XM_039086955.1	Septin9	septin 9 (Septin9), transcript variant X7, mRNA	31.95	-3.07	3.4e-13
NM_001039025.2	Tln1	talin 1 (Tln1), mRNA	25.55	3.44	3.4e-13
NM_001004202.2	Ccl6	C-C motif chemokine ligand 6 (Ccl6), mRNA	600.01	-3.84	3.4e-13
XM_006243761.3	Shisa5	shisa family member 5 (Shisa5), transcript variant X2, mRNA	89.89	-3.63	3.4e-13
XM_039095668.1	Dek	DEK proto-oncogene (Dek), transcript variant X1, mRNA	12.72	4.3	3.5e-13
XM_039104811.1	Nmi	N-myc (and STAT) interactor (Nmi), transcript variant X1, mRNA	48.75	2.62	3.5e-13
NM_001039002.2	Fam43a	family with sequence similarity 43, member A (Fam43a), mRNA	25.94	-2.81	3.7e-13
XM_006228033.3	Lilrb3l	leukocyte immunoglobulin-like receptor, subfamily B (with TM and ITIM domains), member 3-like (Lilrb3l), transcript variant X4, mRNA	5.8	-34.76	3.9e-13
XM_006247257.4	Stat3	signal transducer and activator of transcription 3 (Stat3), transcript variant X1, mRNA	5.64	3.25	4e-13
XM_008768547.3	Tmprss2	transmembrane serine protease 2 (Tmprss2), transcript variant X1, mRNA	1.13	75.58	4.1e-13
NM_001025733.2	Procr	protein C receptor (Procr), mRNA	16.7	5.89	4.2e-13
NM_001044257.1	Epsti1	epithelial stromal interaction 1 (Epsti1), mRNA	81.77	2.95	4.4e-13
XR_005500334.1	Fyb1	FYN binding protein 1 (Fyb1), transcript variant X2, misc_RNA	18.66	2.82	4.6e-13
NM_001134972.1	Plekhg2	pleckstrin homology and RhoGEF domain containing G2 (Plekhg2), mRNA	17.86	-2.59	4.6e-13
XM_039104304.1	Gnas	GNAS complex locus (Gnas), transcript variant X13, mRNA	28.83	3.1	4.6e-13
XM_039104810.1	Smox	spermine oxidase (Smox), transcript variant X10, mRNA	6.45	5.97	4.7e-13
XM_008764509.3	Ypel5	yippee-like 5 (Ypel5), transcript variant X3, mRNA	5.65	5.21	4.8e-13
XM_039087473.1	Rnf157	ring finger protein 157 (Rnf157), transcript variant X2, mRNA	7.52	2.99	4.9e-13
XM_039090958.1	Olr1585	olfactory receptor 1585 (Olr1585), transcript variant X1, mRNA	2.38	-16.31	5e-13
XM_039097973.1	LOC679149	similar to carboxylesterase 2 (intestine, liver) (LOC679149), transcript variant X1, mRNA	7.32	7.78	5.3e-13
NM_133416.1	Bcl2a1	BCL2-related protein A1 (Bcl2a1), mRNA	118.62	2.53	5.4e-13
XM_039089380.1	Ttyh3	tweety family member 3 (Ttyh3), transcript variant X1, mRNA	3.85	-984.04	5.5e-13
XM_039107368.1	Abtb1	ankyrin repeat and BTB domain containing 1 (Abtb1), transcript variant X1, mRNA	14.31	3.37	5.7e-13
NM_001199315.1	Gtpbp1	GTP binding protein 1 (Gtpbp1), mRNA	41.16	2.45	5.7e-13
NM_001107058.3	Map3k3	mitogen activated protein kinase kinase kinase 3 (Map3k3), mRNA	40.29	-2.67	5.8e-13
XM_039093896.1	LOC120093163	PHD finger protein 11-like (LOC120093163), transcript variant X3, mRNA	30.23	7.86	5.8e-13
XR_005489311.1	LOC102555030	uncharacterized LOC102555030 (LOC102555030), ncRNA	5.21	7.41	6.3e-13
NM_139081.2	Oaz1	ornithine decarboxylase antizyme 1 (Oaz1), transcript variant 1, mRNA	114.82	3.05	6.4e-13
XR_354668.4	LOC102550498	uncharacterized LOC102550498 (LOC102550498), ncRNA	19.62	3.18	6.6e-13
XM_039107586.1	Loxl3	lysyl oxidase-like 3 (Loxl3), transcript variant X1, mRNA	3.24	8.86	6.6e-13
NM_001109651.1	Fam241a	family with sequence similarity 241 member A (Fam241a), mRNA	15.15	6.82	6.6e-13
XM_039093892.1	LOC120093070	PHD finger protein 11-like (LOC120093070), transcript variant X4, mRNA	15.9	4.19	6.7e-13
XM_039105643.1	Slpil3	antileukoproteinase-like 3 (Slpil3), transcript variant X1, mRNA	1.47	16.01	6.7e-13
XM_006252539.4	Zmiz1	zinc finger, MIZ-type containing 1 (Zmiz1), transcript variant X3, mRNA	10.1	-3.93	6.9e-13
XM_039086878.1	Gngt2	G protein subunit gamma transducin 2 (Gngt2), transcript variant X1, mRNA	14.99	-16.71	6.9e-13
NM_001105735.3	Litaf	lipopolysaccharide-induced TNF factor (Litaf), mRNA	141.54	2.51	7.2e-13
XR_357087.4	Cyp27a1	cytochrome P450, family 27, subfamily a, polypeptide 1 (Cyp27a1), transcript variant X1, misc_RNA	1.52	144.75	7.8e-13
NM_031509.2	Gsta1	glutathione S-transferase alpha 1 (Gsta1), mRNA	6.18	7.14	8e-13
XM_006233679.4	Nacc2	NACC family member 2 (Nacc2), transcript variant X1, mRNA	0.62	7.89	8e-13
NM_001033682.1	Shpk	sedoheptulokinase (Shpk), mRNA	7.28	3.84	8.1e-13
XM_039094876.1	Clcn3	chloride voltage-gated channel 3 (Clcn3), transcript variant X8, mRNA	5.47	3.8	8.2e-13
XM_039078342.1	Csf2rb	colony stimulating factor 2 receptor subunit beta (Csf2rb), transcript variant X1, mRNA	58.02	3.88	8.4e-13
XM_039104195.1	Cdc25b	cell division cycle 25B (Cdc25b), transcript variant X3, mRNA	10.88	6.62	8.8e-13
XM_006234242.4	Ly75	lymphocyte antigen 75 (Ly75), mRNA	4.54	2.7	8.9e-13
NM_001011996.1	C2cd2l	C2CD2-like (C2cd2l), mRNA	14.21	2.68	9e-13
XR_005502401.1	LOC120101645	uncharacterized LOC120101645 (LOC120101645), transcript variant X1, ncRNA	3.03	-59.44	9e-13
XM_006256024.4	Flot1	flotillin 1 (Flot1), transcript variant X1, mRNA	29.43	3.29	1e-12
XM_008769755.3	Cd84	CD84 molecule (Cd84), transcript variant X5, mRNA	42.47	2.75	1e-12
NM_001191815.1	Arhgap28	Rho GTPase activating protein 28 (Arhgap28), mRNA	5.97	3.62	1e-12
XM_006227888.4	Sytl3	synaptotagmin-like 3 (Sytl3), transcript variant X2, mRNA	7.57	3.49	1e-12
XR_005503371.1	LOC120102202	uncharacterized LOC120102202 (LOC120102202), ncRNA	3.5	16.16	1e-12
XM_006231664.4	Slc18a2	solute carrier family 18 member A2 (Slc18a2), transcript variant X1, mRNA	6.78	3.04	1e-12
NM_001014046.2	Rmdn3	regulator of microtubule dynamics 3 (Rmdn3), mRNA	11.27	3.18	1.1e-12
NM_031789.2	Nfe2l2	nuclear factor, erythroid 2-like 2 (Nfe2l2), mRNA	18.6	2.66	1.1e-12
XM_006232776.4	Adar	adenosine deaminase, RNA-specific (Adar), transcript variant X3, mRNA	11.89	2.66	1.2e-12
NM_001301702.1	Azin1	antizyme inhibitor 1 (Azin1), transcript variant 2, mRNA	23.06	2.36	1.2e-12
XM_006243188.3	Pkm	pyruvate kinase M1/2 (Pkm), transcript variant X1, mRNA	468.06	2.57	1.3e-12
XM_006239970.4	Sh3yl1	SH3 and SYLF domain containing 1 (Sh3yl1), transcript variant X1, mRNA	7.72	4.91	1.3e-12
NM_001108216.1	Nck2	NCK adaptor protein 2 (Nck2), mRNA	11.08	4.14	1.4e-12
XR_359928.4	LOC102547139	uncharacterized LOC102547139 (LOC102547139), ncRNA	9.22	3.49	1.4e-12
NM_001297557.1	Oaz1	ornithine decarboxylase antizyme 1 (Oaz1), transcript variant 1, mRNA	114.28	3.03	1.4e-12
XM_039086369.1	Nkg7	natural killer cell granule protein 7 (Nkg7), transcript variant X1, mRNA	129.19	2.92	1.4e-12
NM_130413.1	Skap2	src kinase associated phosphoprotein 2 (Skap2), mRNA	109.96	2.32	1.4e-12
XM_006245794.4	Mgrn1	mahogunin ring finger 1 (Mgrn1), transcript variant X3, mRNA	12.65	6.57	1.5e-12
NM_001107164.1	Klf1	Kruppel like factor 1 (Klf1), mRNA	18.43	6.11	1.5e-12
NM_001106636.1	Bsdc1	BSD domain containing 1 (Bsdc1), mRNA	52.88	3.86	1.6e-12
NM_012492.2	Adrb2	adrenoceptor beta 2 (Adrb2), mRNA	15.26	-4.57	1.7e-12
XM_008759923.3	Gsg1l	GSG1-like (Gsg1l), transcript variant X1, mRNA	1.12	26.84	1.7e-12
XM_006250150.4	Selp	selectin P (Selp), transcript variant X1, mRNA	2.03	9.22	1.7e-12
NM_139194.3	Fas	Fas cell surface death receptor (Fas), mRNA	9.69	3.31	1.7e-12
NM_001107107.1	Ets2	ETS proto-oncogene 2, transcription factor (Ets2), mRNA	32.13	2.83	1.7e-12
NM_130403.2	Ppp1r14a	protein phosphatase 1, regulatory (inhibitor) subunit 14A (Ppp1r14a), mRNA	5.46	23.82	1.7e-12
NM_133298.1	Gpnmb	glycoprotein nmb (Gpnmb), mRNA	63.6	-3.85	1.8e-12
XM_006229165.2	Nucb1	nucleobindin 1 (Nucb1), transcript variant X5, mRNA	71.61	2.44	1.8e-12
NM_145081.4	Optn	optineurin (Optn), mRNA	2.35	6.16	1.9e-12
NM_001107652.1	Snx18	sorting nexin 18 (Snx18), mRNA	22.86	2.77	1.9e-12
NM_001077589.1	Rgs16	regulator of G-protein signaling 16 (Rgs16), mRNA	15.59	8.46	1.9e-12
NM_001008884.2	RT1-Db1	RT1 class II, locus Db1 (RT1-Db1), mRNA	214.45	-2.97	1.9e-12
XM_039085714.1	Itgb3	integrin subunit beta 3 (Itgb3), transcript variant X1, mRNA	5.6	4.95	1.9e-12
XM_039098424.1	RT1-A1	RT1 class Ia, locus A1 (RT1-A1), transcript variant X1, mRNA	20.83	3.7	2e-12
NM_001107750.1	Tspan18	tetraspanin 18 (Tspan18), mRNA	2.3	-28.15	2e-12
XM_039113090.1	LOC100910821	uncharacterized LOC100910821 (LOC100910821), mRNA	1.12	51.73	2.1e-12
NM_001191611.1	Kel	Kell metallo-endopeptidase (Kell blood group) (Kel), mRNA	12.11	6.07	2.3e-12
XM_039110457.1	Pcmtd1	protein-L-isoaspartate (D-aspartate) O-methyltransferase domain containing 1 (Pcmtd1), transcript variant X4, mRNA	7.48	-9.09	2.3e-12
NM_001126099.1	Triap1	TP53 regulated inhibitor of apoptosis 1 (Triap1), mRNA	54.98	2.4	2.3e-12
XM_006251780.4	Flnb	filamin B (Flnb), transcript variant X1, mRNA	3.9	-47.54	2.4e-12
NM_001305128.1	Tmcc2	transmembrane and coiled-coil domain family 2 (Tmcc2), mRNA	13.15	5.81	2.5e-12
XM_039094991.1	LOC120097436	HAUS augmin-like complex subunit 8 (LOC120097436), transcript variant X1, mRNA	1.71	19.81	2.5e-12
XM_006249858.4	Kif21b	kinesin family member 21B (Kif21b), transcript variant X7, mRNA	18.57	-3.97	2.8e-12
NM_053383.3	Cd93	CD93 molecule (Cd93), mRNA	6.64	3.53	2.8e-12
NM_001014104.1	Metrnl	meteorin-like, glial cell differentiation regulator (Metrnl), mRNA	29.88	3.02	2.9e-12
XM_017601449.2	Gse1	Gse1 coiled-coil protein (Gse1), transcript variant X1, mRNA	1.26	11.46	2.9e-12
NM_021836.2	Junb	JunB proto-oncogene, AP-1 transcription factor subunit (Junb), mRNA	78.7	3.56	3e-12
NM_017284.1	Psmb2	proteasome 20S subunit beta 2 (Psmb2), mRNA	69.11	2.47	3.1e-12
XM_039099509.1	Alas2	5'-aminolevulinate synthase 2 (Alas2), transcript variant X6, mRNA	12.09	8.07	3.2e-12
NM_138911.3	Stip1	stress-induced phosphoprotein 1 (Stip1), mRNA	46.11	3.1	3.2e-12
NM_022600.2	Adcy5	adenylate cyclase 5 (Adcy5), mRNA	1.18	11.01	3.3e-12
NM_024149.2	Arf5	ADP-ribosylation factor 5 (Arf5), mRNA	78.55	2.89	3.3e-12
XM_006247921.4	Mafg	MAF bZIP transcription factor G (Mafg), transcript variant X8, mRNA	2.57	4.7	3.3e-12
XM_039099760.1	Bcor	BCL6 co-repressor (Bcor), transcript variant X2, mRNA	2.83	-885.68	3.5e-12
XM_039108345.1	Tmem40	transmembrane protein 40 (Tmem40), transcript variant X1, mRNA	2.06	30.52	3.5e-12
XM_039087985.1	Fxn	frataxin (Fxn), transcript variant X1, mRNA	12.45	7.29	3.6e-12
XM_006246502.4	Specc1	sperm antigen with calponin homology and coiled-coil domains 1 (Specc1), transcript variant X2, mRNA	3.29	3.94	3.6e-12
NM_001039609.2	Fnbp1l	formin binding protein 1-like (Fnbp1l), mRNA	2.06	6.81	3.6e-12
NM_001313924.1	Lilrb3a	leukocyte immunoglobulin-like receptor, subfamily B (with TM and ITIM domains), member 3A (Lilrb3a), mRNA	18.5	2.71	3.7e-12
NM_019354.3	Ucp2	uncoupling protein 2 (Ucp2), mRNA; nuclear gene for mitochondrial product	1430.53	3.45	3.8e-12
NM_013044.2	Tmod1	tropomodulin 1 (Tmod1), mRNA	4.34	8.88	4e-12
XM_017595263.2	Mrtfa	myocardin related transcription factor A (Mrtfa), transcript variant X5, mRNA	46.92	-2.43	4.1e-12
XM_006249852.4	Adipor1	adiponectin receptor 1 (Adipor1), transcript variant X1, mRNA	81.22	3.22	4.1e-12
XM_039090831.1	Zfp281	zinc finger protein 281 (Zfp281), transcript variant X1, mRNA	3.72	2.98	4.2e-12
NM_001105807.2	Mnt	MAX network transcriptional repressor (Mnt), mRNA	29.11	-2.57	4.2e-12
NM_175758.3	Slc1a5	solute carrier family 1 member 5 (Slc1a5), mRNA	10.33	3.24	4.2e-12
XM_002729947.6	LOC100359937	GABA(A) receptor-associated protein-like 2-like (LOC100359937), mRNA	18.82	10.87	4.3e-12
XM_039111403.1	Dcaf12	DDB1 and CUL4 associated factor 12 (Dcaf12), transcript variant X1, mRNA	15.66	3.03	4.4e-12
XM_006230350.4	Tgfb1i1	transforming growth factor beta 1 induced transcript 1 (Tgfb1i1), transcript variant X4, mRNA	3.96	8.22	4.5e-12
NM_001109899.2	Oaz2	ornithine decarboxylase antizyme 2 (Oaz2), transcript variant 1, mRNA	27.42	2.54	4.7e-12
XM_017588775.1	Atp1a3	ATPase Na+/K+ transporting subunit alpha 3 (Atp1a3), transcript variant X1, mRNA	12.26	-28.06	4.7e-12
NM_212509.2	Nfkbil1	NFKB inhibitor like 1 (Nfkbil1), mRNA	5.9	8.06	4.9e-12
XM_039080880.1	Icam1	intercellular adhesion molecule 1 (Icam1), transcript variant X1, mRNA	4.01	5.89	4.9e-12
XM_039107192.1	Cd36	CD36 molecule (Cd36), transcript variant X3, mRNA	6.47	-12.93	5.4e-12
NM_001134507.1	RGD1309350	similar to transthyretin (4L369) (RGD1309350), mRNA	23.41	3.91	5.4e-12
NM_001037648.1	Otulinl	OTU deubiquitinase with linear linkage specificity like (Otulinl), mRNA	60.87	-2.57	5.5e-12
NM_001110345.2	Ube2v1	ubiquitin conjugating enzyme E2 V1 (Ube2v1), mRNA	116.27	3	5.5e-12
NM_001045843.1	Lpar6	lysophosphatidic acid receptor 6 (Lpar6), mRNA	58.29	-2.74	5.5e-12
XM_039102890.1	Rit1	Ras-like without CAAX 1 (Rit1), transcript variant X1, mRNA	31.39	2.31	5.6e-12
XM_006246599.4	Eno3	enolase 3 (Eno3), transcript variant X1, mRNA	13.58	-6.18	5.7e-12
XM_006248658.4	Mapk1	mitogen activated protein kinase 1 (Mapk1), transcript variant X1, mRNA	28.11	2.42	5.9e-12
XM_006254216.4	Sfmbt2	Scm-like with four mbt domains 2 (Sfmbt2), transcript variant X5, mRNA	0.49	85.04	6.3e-12
XM_039088723.1	Prkn	parkin RBR E3 ubiquitin protein ligase (Prkn), transcript variant X8, mRNA	13.46	5.43	6.3e-12
XM_039089837.1	Ache	acetylcholinesterase (Ache), transcript variant X1, mRNA	2.19	14.49	6.4e-12
NM_001107823.1	Gfi1b	growth factor independent 1B transcriptional repressor (Gfi1b), mRNA	16.25	2.92	6.6e-12
NM_130823.3	Atp6v0c	ATPase H+ transporting V0 subunit C (Atp6v0c), mRNA	175.57	2.81	6.8e-12
XM_039097676.1	Glg1	golgi glycoprotein 1 (Glg1), transcript variant X1, mRNA	15.41	-2.33	7e-12
XM_039098155.1	Nlrc5	NLR family, CARD domain containing 5 (Nlrc5), transcript variant X6, mRNA	6.98	2.56	7.2e-12
NM_173143.1	Abi2	abl-interactor 2 (Abi2), mRNA	5.62	3.51	7.3e-12
NM_053883.3	Dusp6	dual specificity phosphatase 6 (Dusp6), mRNA	21.33	-7.65	7.5e-12
NM_001191807.3	Ankrd44	ankyrin repeat domain 44 (Ankrd44), mRNA	20.15	-3.54	7.9e-12
NM_001008836.1	RT1-CE13	RT1 class I, locus CE13 (RT1-CE13), mRNA	32.57	2.55	8.6e-12
NM_053842.2	Mapk1	mitogen activated protein kinase 1 (Mapk1), mRNA	8.03	2.74	9.4e-12
NM_080888.2	Bnip3l	BCL2 interacting protein 3 like (Bnip3l), mRNA	132.39	3.69	9.7e-12
NM_001024755.1	Ube2l6	ubiquitin-conjugating enzyme E2L 6 (Ube2l6), mRNA	5.59	6.05	9.8e-12
XM_039093963.1	Dach1	dachshund family transcription factor 1 (Dach1), transcript variant X1, mRNA	0.6	44.65	9.9e-12
NM_012732.3	Lipa	lipase A, lysosomal acid type (Lipa), mRNA	9.95	-9.95	1e-11
XM_017591125.2	Csf1	colony stimulating factor 1 (Csf1), transcript variant X4, mRNA	12.88	3.65	1e-11
XM_006248000.4	Cxadr	CXADR, Ig-like cell adhesion molecule (Cxadr), transcript variant X1, mRNA	0.37	45.35	1e-11
XM_039093608.1	Ptk2b	protein tyrosine kinase 2 beta (Ptk2b), transcript variant X5, mRNA	15.51	3.26	1.1e-11
NM_001271102.1	Crem	cAMP responsive element modulator (Crem), transcript variant 5, mRNA	0.85	28.19	1.1e-11
NM_053837.2	Ap2m1	adaptor related protein complex 2 subunit mu 1 (Ap2m1), mRNA	31.61	2.46	1.1e-11
NM_001044287.1	Evi2a	ecotropic viral integration site 2A (Evi2a), mRNA	129.86	2.36	1.1e-11
XM_039081929.1	Slc37a2	solute carrier family 37 member 2 (Slc37a2), transcript variant X2, mRNA	3.4	-24.94	1.1e-11
XM_039086649.1	RGD1559482	similar to immunoglobulin superfamily, member 7 (RGD1559482), transcript variant X1, mRNA	14.17	-23.32	1.1e-11
XM_039087956.1	Mx1	myxovirus (influenza virus) resistance 1 (Mx1), transcript variant X3, mRNA	1.46	10.19	1.2e-11
NM_001011929.1	Sh3glb1	SH3 domain -containing GRB2-like endophilin B1 (Sh3glb1), mRNA	65.28	2.91	1.2e-11
NM_031979.3	Ybx3	Y box binding protein 3 (Ybx3), mRNA	24.46	5.39	1.2e-11
XM_017595705.2	Zbtb16	zinc finger and BTB domain containing 16 (Zbtb16), transcript variant X1, mRNA	1.15	-43.38	1.2e-11
XM_039091211.1	Zbtb32	zinc finger and BTB domain containing 32 (Zbtb32), transcript variant X2, mRNA	5.1	7.97	1.2e-11
NM_001130490.1	Lrp1	LDL receptor related protein 1 (Lrp1), mRNA	14.84	-7.98	1.3e-11
XM_006256078.4	Lst1	leukocyte specific transcript 1 (Lst1), transcript variant X1, mRNA	23.17	-4.13	1.3e-11
XR_005498564.1	LOC120099382	uncharacterized LOC120099382 (LOC120099382), transcript variant X8, ncRNA	1.34	40.44	1.4e-11
XM_006236591.4	Snca	synuclein alpha (Snca), transcript variant X1, mRNA	17.53	7.55	1.4e-11
XM_039079709.1	Nfe2	nuclear factor, erythroid 2 (Nfe2), transcript variant X1, mRNA	15.32	3.53	1.5e-11
NM_053474.2	Ppp1r9b	protein phosphatase 1, regulatory subunit 9B (Ppp1r9b), mRNA	72.38	-2.37	1.5e-11
XM_039079161.1	Pkhd1l1	PKHD1 like 1 (Pkhd1l1), transcript variant X1, mRNA	0.24	16.05	1.5e-11
XM_006229884.3	Trim21	tripartite motif-containing 21 (Trim21), transcript variant X1, mRNA	9.75	2.84	1.5e-11
XM_039104342.1	Rxra	retinoid X receptor alpha (Rxra), transcript variant X1, mRNA	14.62	-7.86	1.5e-11
XM_006246741.4	Sgsm2	small G protein signaling modulator 2 (Sgsm2), transcript variant X3, mRNA	1.57	25.08	1.6e-11
NM_080697.2	Dynll2	dynein light chain LC8-type 2 (Dynll2), mRNA	20.82	2.44	1.6e-11
XM_039081979.1	Bfsp2	beaded filament structural protein 2 (Bfsp2), transcript variant X2, mRNA	6.23	6.41	1.6e-11
XR_001840408.2	Ccdc50	coiled-coil domain containing 50 (Ccdc50), transcript variant X2, misc_RNA	19.77	-2.53	1.6e-11
XM_039093545.1	Abhd4	abhydrolase domain containing 4, N-acyl phospholipase B (Abhd4), transcript variant X3, mRNA	31.52	3.95	1.6e-11
XM_039099689.1	Ophn1	oligophrenin 1 (Ophn1), transcript variant X2, mRNA	0.5	15.88	1.7e-11
NM_001033924.1	Fcer2	Fc fragment of IgE receptor II (Fcer2), transcript variant 1, mRNA	36.49	-10.39	1.7e-11
XR_005503611.1	LOC120102286	uncharacterized LOC120102286 (LOC120102286), ncRNA	0.98	3.52	1.7e-11
XM_039078354.1	Rap1b	RAP1B, member of RAS oncogene family (Rap1b), transcript variant X1, mRNA	275.17	2.33	1.7e-11
XM_006255825.4	Nrp1	neuropilin 1 (Nrp1), transcript variant X1, mRNA	15.4	-43.57	1.8e-11
XM_039082022.1	Acp3	acid phosphatase 3 (Acp3), transcript variant X1, mRNA	6.43	-5.56	1.8e-11
XM_213532.9	Ubald2	UBA-like domain containing 2 (Ubald2), mRNA	161.56	2.46	1.9e-11
NM_001108074.2	Fzr1	fizzy and cell division cycle 20 related 1 (Fzr1), mRNA	20.65	4.05	2.1e-11
NM_001012740.1	Cbln2	cerebellin 2 precursor (Cbln2), mRNA	2.77	10.93	2.1e-11
XM_039087902.1	Ap2m1	adaptor related protein complex 2 subunit mu 1 (Ap2m1), transcript variant X1, mRNA	174.95	2.16	2.1e-11
XM_039087216.1	Irgm2	immunity-related GTPase family M member 2 (Irgm2), transcript variant X2, mRNA	6.67	6.21	2.1e-11
XM_039086189.1	Tmem104	transmembrane protein 104 (Tmem104), transcript variant X2, mRNA	8.22	-4.02	2.1e-11
NM_053736.2	Casp4	caspase 4 (Casp4), mRNA	11.11	4.51	2.2e-11
NM_001037096.1	Rassf2	Ras association domain family member 2 (Rassf2), mRNA	24.43	-2.61	2.4e-11
XM_039104598.1	Cst7	cystatin F (Cst7), transcript variant X2, mRNA	24.99	3.18	2.4e-11
XM_006253674.3	Auh	AU RNA binding methylglutaconyl-CoA hydratase (Auh), transcript variant X1, mRNA	18.08	3.07	2.5e-11
XM_006247184.4	Phospho1	phosphoethanolamine/phosphocholine phosphatase 1 (Phospho1), transcript variant X1, mRNA	16.85	5.63	2.5e-11
NM_173111.2	Tpm3	tropomyosin 3 (Tpm3), transcript variant Tpm3.1, mRNA	248.89	2.16	2.6e-11
NM_001013895.1	Prkd2	protein kinase D2 (Prkd2), mRNA	33.13	-2.79	2.6e-11
NM_031776.2	Gda	guanine deaminase (Gda), mRNA	27.77	3.79	2.6e-11
NM_053425.1	Ccs	copper chaperone for superoxide dismutase (Ccs), mRNA	11.04	4.92	2.6e-11
NM_001011991.1	Ndrg1	N-myc downstream regulated 1 (Ndrg1), mRNA	28.94	-6.26	2.8e-11
XM_225927.9	Malt1	MALT1 paracaspase (Malt1), transcript variant X2, mRNA	25.59	-3.52	2.8e-11
XM_008767946.3	Slc4a1	solute carrier family 4 member 1 (Diego blood group) (Slc4a1), transcript variant X1, mRNA	35.12	5.88	3e-11
NM_001047897.1	Ormdl3	ORMDL sphingolipid biosynthesis regulator 3 (Ormdl3), mRNA	19.45	5.67	3e-11
NM_001107388.2	Dmxl1	Dmx-like 1 (Dmxl1), mRNA	16.09	-2.6	3.2e-11
XM_039089658.1	Oas1k	2 ' -5 ' oligoadenylate synthetase 1K (Oas1k), transcript variant X2, mRNA	11.9	4.04	3.3e-11
NM_017045.2	Rb1	RB transcriptional corepressor 1 (Rb1), mRNA	35.33	2.34	3.3e-11
NM_030857.2	Lyn	LYN proto-oncogene, Src family tyrosine kinase (Lyn), transcript variant 1, mRNA	59.17	2.29	3.4e-11
NM_001006989.1	Shisa5	shisa family member 5 (Shisa5), mRNA	20.18	3.26	3.4e-11
NM_001109436.2	Mogat2	monoacylglycerol O-acyltransferase 2 (Mogat2), mRNA	1.02	55.82	3.5e-11
XM_008766319.3	Ccpg1	cell cycle progression 1 (Ccpg1), transcript variant X6, mRNA	18.11	-4.42	3.8e-11
XM_006233451.4	Prkacb	protein kinase cAMP-activated catalytic subunit beta (Prkacb), transcript variant X1, mRNA	49.58	-2.47	3.8e-11
NM_033443.1	Arsb	arylsulfatase B (Arsb), mRNA	15.18	2.95	3.9e-11
NM_173114.2	Parm1	prostate androgen-regulated mucin-like protein 1 (Parm1), mRNA	4.23	3.66	4e-11
NM_017253.2	Bcat1	branched chain amino acid transaminase 1 (Bcat1), mRNA	6.33	5.79	4e-11
NM_012844.3	Ephx1	epoxide hydrolase 1 (Ephx1), transcript variant 2, mRNA	6.97	4.25	4.1e-11
XM_039085271.1	Atp2a3	ATPase sarcoplasmic/endoplasmic reticulum Ca2+ transporting 3 (Atp2a3), transcript variant X1, mRNA	52.74	2.29	4.2e-11
XR_356496.4	LOC102550510	uncharacterized LOC102550510 (LOC102550510), transcript variant X1, ncRNA	0.54	21.28	4.2e-11
XM_008764425.2	Eif2ak2	eukaryotic translation initiation factor 2-alpha kinase 2 (Eif2ak2), transcript variant X1, mRNA	3.34	4.76	4.3e-11
NM_001004446.1	Smarca2	SWI/SNF related, matrix associated, actin dependent regulator of chromatin, subfamily a, member 2 (Smarca2), mRNA	14.96	-2.54	4.4e-11
NM_001013428.1	Pla2g2d	phospholipase A2, group IID (Pla2g2d), mRNA	22.3	-34.1	4.5e-11
XR_351240.4	Arrdc3	arrestin domain containing 3 (Arrdc3), transcript variant X1, misc_RNA	43.83	-2.59	4.5e-11
NM_022297.3	Ddah1	dimethylarginine dimethylaminohydrolase 1 (Ddah1), mRNA	2.72	8.42	4.5e-11
NM_001111127.1	Hist3h2ba	histone cluster 3, H2ba (Hist3h2ba), mRNA	22.56	5.68	4.6e-11
NM_001107883.2	Il17ra	interleukin 17 receptor A (Il17ra), mRNA	166.69	-2.93	5e-11
XM_017589658.2	Cd151	CD151 molecule (Raph blood group) (Cd151), transcript variant X2, mRNA	7.92	4.32	5.3e-11
XM_006237267.4	B4galnt3	beta-1,4-N-acetyl-galactosaminyl transferase 3 (B4galnt3), transcript variant X1, mRNA	0.39	53.57	5.7e-11
XM_008765978.3	Shfl	shiftless antiviral inhibitor of ribosomal frameshifting (Shfl), transcript variant X3, mRNA	4.39	6.54	5.9e-11
NM_012651.2	Slc4a1	solute carrier family 4 member 1 (Diego blood group) (Slc4a1), mRNA	74.18	5.07	6e-11
XM_006241059.4	Rasal3	RAS protein activator like 3 (Rasal3), transcript variant X1, mRNA	40.54	-2.49	6.1e-11
XM_039093446.1	Ube2e2	ubiquitin-conjugating enzyme E2E 2 (Ube2e2), transcript variant X2, mRNA	5.77	6.01	6.2e-11
NM_012614.2	Npy	neuropeptide Y (Npy), mRNA	13178.9	2.24	6.2e-11
NM_130829.2	Palm	paralemmin (Palm), mRNA	11.39	-12.51	6.2e-11
NM_133294.2	Hemgn	hemogen (Hemgn), transcript variant 1, mRNA	55.74	4.82	6.2e-11
XM_006235065.4	Smox	spermine oxidase (Smox), transcript variant X6, mRNA	11.37	2.95	6.6e-11
NM_145783.1	Cox5a	cytochrome c oxidase subunit 5A (Cox5a), mRNA; nuclear gene for mitochondrial product	49.65	2.66	6.6e-11
XM_039108586.1	LOC103690031	sterile alpha motif domain-containing protein 9-like (LOC103690031), transcript variant X2, mRNA	1.56	5.92	6.7e-11
NM_134332.2	Gzmc	granzyme C (Gzmc), mRNA	14.98	5.69	6.9e-11
XM_039090321.1	Cd48	Cd48 molecule (Cd48), transcript variant X2, mRNA	15.58	3.2	7.3e-11
XM_039103612.1	Atp11b	ATPase phospholipid transporting 11B (putative) (Atp11b), transcript variant X1, mRNA	55.28	2.2	7.5e-11
XM_006234273.4	Tank	TRAF family member-associated NFKB activator (Tank), transcript variant X1, mRNA	10.9	3.09	8e-11
XM_002727841.5	Cd300ld	Cd300 molecule-like family member D (Cd300ld), transcript variant X1, mRNA	20.09	-5.28	8.1e-11
XM_006249185.4	Limk1	LIM domain kinase 1 (Limk1), transcript variant X1, mRNA	10.68	-5.32	8.2e-11
XM_006254930.4	Rab27b	RAB27B, member RAS oncogene family (Rab27b), transcript variant X2, mRNA	3.64	10.07	8.3e-11
XR_005494426.1	LOC120097182	uncharacterized LOC120097182 (LOC120097182), transcript variant X1, ncRNA	3.11	7.56	8.3e-11
NM_001047891.2	RGD1310507	similar to RIKEN cDNA 1300017J02 (RGD1310507), mRNA	6.33	6.23	8.5e-11
XM_039078189.1	Dennd5a	DENN domain containing 5A (Dennd5a), transcript variant X2, mRNA	8.99	5.07	8.5e-11
NM_013195.2	Il2rb	interleukin 2 receptor subunit beta (Il2rb), mRNA	153.92	2.57	8.8e-11
NM_031355.2	Vdac3	voltage-dependent anion channel 3 (Vdac3), mRNA	58.52	2.29	9e-11
XM_039080126.1	Zfc3h1	zinc finger, C3H1-type containing (Zfc3h1), transcript variant X1, mRNA	14.83	-3.25	9.1e-11
NM_001109025.2	Rnf5	ring finger protein 5 (Rnf5), mRNA	31.04	2.99	9.2e-11
XM_008766357.3	Dmxl2	Dmx-like 2 (Dmxl2), transcript variant X1, mRNA	1.51	-66.63	9.4e-11
XR_357343.4	LOC102555849	uncharacterized LOC102555849 (LOC102555849), ncRNA	3.46	3.37	9.4e-11
NM_001107664.1	Hps3	HPS3, biogenesis of lysosomal organelles complex 2 subunit 1 (Hps3), mRNA	10.82	-3.75	9.9e-11
NM_017183.2	Cxcr2	C-X-C motif chemokine receptor 2 (Cxcr2), mRNA	136.73	3.12	1e-10
XM_006242896.3	Hmbs	hydroxymethylbilane synthase (Hmbs), transcript variant X2, mRNA	8.21	7.15	1e-10
XM_008769160.2	Sap25	Sin3A-associated protein 25 (Sap25), mRNA	51.91	-2.77	1e-10
NM_001010967.2	Naaa	N-acylethanolamine acid amidase (Naaa), mRNA	40.59	-3.08	1e-10
XM_006237565.3	Arhgdib	Rho GDP dissociation inhibitor beta (Arhgdib), transcript variant X5, mRNA	33.68	-7.3	1e-10
NM_031687.3	Uba52	ubiquitin A-52 residue ribosomal protein fusion product 1 (Uba52), mRNA	759.83	2.48	1e-10
XM_039098833.1	Tnfaip3	TNF alpha induced protein 3 (Tnfaip3), transcript variant X4, mRNA	2.16	7.86	1e-10
XM_039102398.1	Bcl9	BCL9, transcription coactivator (Bcl9), transcript variant X2, mRNA	1.55	-59.7	1e-10
NM_001369126.1	Faah	fatty acid amide hydrolase (Faah), mRNA	14.15	-4.87	1e-10
XM_039093875.1	Setdb2	SET domain bifurcated histone lysine methyltransferase 2 (Setdb2), transcript variant X1, mRNA	2.43	4.19	1.1e-10
XR_005495996.1	Cbln2	cerebellin 2 precursor (Cbln2), transcript variant X4, misc_RNA	1.26	10.66	1.1e-10
XR_355093.4	LOC102550757	uncharacterized LOC102550757 (LOC102550757), transcript variant X1, ncRNA	4.9	11.3	1.2e-10
NM_001008764.2	Psenen	presenilin enhancer gamma secretase subunit (Psenen), mRNA	99.87	2.66	1.2e-10
NM_080585.2	Napa	NSF attachment protein alpha (Napa), mRNA	35.3	2.85	1.2e-10
NM_001006962.1	Tinf2	TERF1 interacting nuclear factor 2 (Tinf2), mRNA	1.33	84.15	1.2e-10
XM_039098565.1	Trpm2	transient receptor potential cation channel, subfamily M, member 2 (Trpm2), transcript variant X18, mRNA	4.64	3.65	1.2e-10
NM_001109115.1	Ctla2a	cytotoxic T lymphocyte-associated protein 2 alpha (Ctla2a), mRNA	24.69	3.4	1.3e-10
XM_017599393.2	Rtn4	reticulon 4 (Rtn4), transcript variant X3, mRNA	6.23	12.26	1.4e-10
XM_039082060.1	Ccr2	C-C motif chemokine receptor 2 (Ccr2), transcript variant X2, mRNA	32.59	-5.99	1.4e-10
XM_008761428.3	Csf1	colony stimulating factor 1 (Csf1), transcript variant X2, mRNA	11.56	3.1	1.4e-10
XM_008768408.3	Rab37	RAB37, member RAS oncogene family (Rab37), transcript variant X1, mRNA	12.27	3.11	1.4e-10
NM_012908.1	Faslg	Fas ligand (Faslg), mRNA	23.55	2.72	1.4e-10
XM_039082004.1	Rab27a	RAB27A, member RAS oncogene family (Rab27a), transcript variant X1, mRNA	44.44	-2.47	1.4e-10
NM_001359867.1	Gnas	GNAS complex locus (Gnas), transcript variant 6, mRNA	17.09	3.02	1.4e-10
XR_005490136.1	LOC120095074	uncharacterized LOC120095074 (LOC120095074), ncRNA	1.68	3.57	1.4e-10
XM_006246295.4	Tbc1d9b	TBC1 domain family member 9B (Tbc1d9b), transcript variant X3, mRNA	6.82	-4.69	1.4e-10
XM_039092551.1	Apba1	amyloid beta precursor protein binding family A member 1 (Apba1), transcript variant X2, mRNA	1.18	-25.13	1.5e-10
XM_039109615.1	Rhbdl2	rhomboid like 2 (Rhbdl2), transcript variant X1, mRNA	8.77	3.19	1.5e-10
NM_031552.2	Add3	adducin 3 (Add3), transcript variant 2, mRNA	16.54	-3.55	1.5e-10
XM_006247739.4	Igsf7	immunoglobulin superfamily, member 7 (Igsf7), transcript variant X1, mRNA	6.5	-54.41	1.5e-10
XM_039089382.1	Ttyh3	tweety family member 3 (Ttyh3), transcript variant X4, mRNA	1.44	8.02	1.5e-10
XM_039090020.1	LOC681341	similar to paired immunoglobin-like type 2 receptor beta (LOC681341), transcript variant X1, mRNA	9	-18.73	1.6e-10
NM_001106885.1	Trem1	triggering receptor expressed on myeloid cells 1 (Trem1), mRNA	20.36	4.54	1.6e-10
XM_039108800.1	Tmem121b	transmembrane protein 121B (Tmem121b), mRNA	1.78	-21.82	1.7e-10
XM_039112361.1	Rin3	Ras and Rab interactor 3 (Rin3), transcript variant X4, mRNA	23.65	-3.24	1.7e-10
XM_008764510.3	Ypel5	yippee-like 5 (Ypel5), transcript variant X7, mRNA	3.04	6.64	1.8e-10
XM_039094883.1	Lrrc25	leucine rich repeat containing 25 (Lrrc25), transcript variant X3, mRNA	7.05	4.5	1.8e-10
NM_001107067.2	Rhbdf2	rhomboid 5 homolog 2 (Rhbdf2), transcript variant 1, mRNA	24.49	2.88	1.8e-10
NM_001009623.1	Tnfsf13	TNF superfamily member 13 (Tnfsf13), mRNA	10.28	-16.53	1.8e-10
XM_039110926.1	Gm5471	predicted pseudogene 5471 (Gm5471), mRNA	19.12	6.45	1.8e-10
NM_030990.3	Plp1	proteolipid protein 1 (Plp1), mRNA	3.48	6.2	1.8e-10
NM_024403.2	Atf4	activating transcription factor 4 (Atf4), mRNA	132.59	2.16	1.9e-10
NM_199085.2	Serpinb6a	serpin family B member 6A (Serpinb6a), mRNA	41.07	2.48	1.9e-10
XM_039096125.1	Lyst	lysosomal trafficking regulator (Lyst), transcript variant X7, mRNA	20.06	-2.33	1.9e-10
NM_001003403.2	Apold1	apolipoprotein L domain containing 1 (Apold1), mRNA	1.09	492.56	1.9e-10
XR_005492194.1	Ppfia4	PTPRF interacting protein alpha 4 (Ppfia4), transcript variant X3, misc_RNA	0.45	78.12	1.9e-10
NM_001013209.1	Dnajb6	DnaJ heat shock protein family (Hsp40) member B6 (Dnajb6), mRNA	14.09	2.61	2e-10
XM_039083794.1	Lpin2	lipin 2 (Lpin2), transcript variant X4, mRNA	5.81	2.89	2e-10
XM_006242809.4	Slc37a2	solute carrier family 37 member 2 (Slc37a2), transcript variant X1, mRNA	1.66	-80.66	2.1e-10
NM_053319.3	Dynll1	dynein light chain LC8-type 1 (Dynll1), mRNA	179.52	2.12	2.1e-10
XM_039089641.1	Selplg	selectin P ligand (Selplg), transcript variant X1, mRNA	81.2	-2.33	2.1e-10
XR_362046.3	Pi16	peptidase inhibitor 16 (Pi16), transcript variant X1, misc_RNA	7.95	-12.98	2.1e-10
XM_039091428.1	LOC102556096	pyrin domain-containing protein 3-like (LOC102556096), transcript variant X1, mRNA	46.58	3.05	2.1e-10
XM_006235870.3	Ptpn12	protein tyrosine phosphatase, non-receptor type 12 (Ptpn12), transcript variant X2, mRNA	9.2	3.37	2.2e-10
XM_006249712.4	Il10	interleukin 10 (Il10), transcript variant X2, mRNA	1.53	19.36	2.2e-10
XM_006236550.4	Nt5c3a	5'-nucleotidase, cytosolic IIIA (Nt5c3a), transcript variant X2, mRNA	7.93	5.72	2.2e-10
XM_006245296.3	Usp37	ubiquitin specific peptidase 37 (Usp37), transcript variant X6, mRNA	4.19	3.36	2.3e-10
XM_006250959.4	Klhl5	kelch-like family member 5 (Klhl5), transcript variant X1, mRNA	13.09	-4.2	2.3e-10
NM_053687.2	Slfn4	schlafen family member 4 (Slfn4), mRNA	371.79	2.8	2.4e-10
NM_001107775.1	Slc4a11	solute carrier family 4 member 11 (Slc4a11), mRNA	15.99	-3.49	2.4e-10
XM_006249639.4	Serpinb2	serpin family B member 2 (Serpinb2), transcript variant X1, mRNA	0.82	32.46	2.4e-10
NM_001105966.1	Creg1	cellular repressor of E1A-stimulated genes 1 (Creg1), mRNA	100.46	4.11	2.4e-10
NM_019123.2	St6galnac3	ST6 N-acetylgalactosaminide alpha-2,6-sialyltransferase 3 (St6galnac3), mRNA	4.33	4.36	2.4e-10
XM_039085189.1	Irf1	interferon regulatory factor 1 (Irf1), transcript variant X2, mRNA	17.63	3.96	2.6e-10
XM_001055430.7	Msrb3	methionine sulfoxide reductase B3 (Msrb3), transcript variant X3, mRNA	5.02	3.83	2.6e-10
NR_126577.1	Lnc134	long non-coding RNA 134 (Lnc134), transcript variant 1, long non-coding RNA	12.65	5.52	2.6e-10
XM_039085542.1	Rhbdl3	rhomboid like 3 (Rhbdl3), transcript variant X2, mRNA	1.53	9.18	2.6e-10
NM_001371967.1	Prdm8	PR/SET domain 8 (Prdm8), mRNA	0.52	66.46	2.8e-10
NM_198765.3	Bicd2	BICD cargo adaptor 2 (Bicd2), transcript variant 2, mRNA	10.28	2.32	2.9e-10
NM_001017960.2	Thra	thyroid hormone receptor alpha (Thra), transcript variant TRalpha1, mRNA	7.55	-6.07	3e-10
NM_001134691.1	Ost4	oligosaccharyltransferase complex subunit 4, non-catalytic (Ost4), transcript variant 1, mRNA	144.1	2.44	3e-10
NM_001109236.1	Nod1	nucleotide-binding oligomerization domain containing 1 (Nod1), mRNA	11.61	2.46	3.1e-10
NM_001113223.2	LOC100134871	beta globin minor gene (LOC100134871), mRNA	394.38	119381	3.3e-10
XM_006253845.4	Slc22a23	solute carrier family 22, member 23 (Slc22a23), transcript variant X3, mRNA	1.89	5.24	3.3e-10
NM_001271084.1	Svip	small VCP interacting protein (Svip), mRNA	7.96	7.02	3.4e-10
XM_039090633.1	Akt3	AKT serine/threonine kinase 3 (Akt3), transcript variant X6, mRNA	16.24	2.17	3.4e-10
XM_006229885.3	Trim21	tripartite motif-containing 21 (Trim21), transcript variant X2, mRNA	10.81	2.6	3.5e-10
XM_006233069.2	Dennd2c	DENN domain containing 2C (Dennd2c), transcript variant X2, mRNA	1.48	13.74	3.5e-10
NM_013215.2	Akr7a3	aldo-keto reductase family 7 member A3 (Akr7a3), mRNA	7.78	6.83	3.5e-10
XM_017599428.2	Rasgef1b	RasGEF domain family, member 1B (Rasgef1b), transcript variant X2, mRNA	5.74	3.35	3.5e-10
XM_008772570.3	Mlkl	mixed lineage kinase domain like pseudokinase (Mlkl), transcript variant X3, mRNA	2.47	8.51	3.6e-10
XM_218313.10	Adgrg6	adhesion G protein-coupled receptor G6 (Adgrg6), transcript variant X1, mRNA	1.85	4.11	3.6e-10
XM_230550.10	Lrrn4	leucine rich repeat neuronal 4 (Lrrn4), mRNA	0.82	10.72	3.6e-10
XM_006237561.4	Arhgdib	Rho GDP dissociation inhibitor beta (Arhgdib), transcript variant X3, mRNA	86.33	-2.88	3.7e-10
XM_006251328.2	Mxd4	Max dimerization protein 4 (Mxd4), transcript variant X1, mRNA	24.29	-2.32	3.8e-10
XM_006254694.4	Ap3s1	adaptor related protein complex 3 subunit sigma 1 (Ap3s1), transcript variant X2, mRNA	36.19	2.37	3.9e-10
NM_133555.1	Csf2rb	colony stimulating factor 2 receptor subunit beta (Csf2rb), mRNA	29.07	4.13	3.9e-10
XM_039100215.1	Nhsl2	NHS-like 2 (Nhsl2), transcript variant X8, mRNA	1.4	-14.55	3.9e-10
NM_001008830.1	RT1-A3	RT1 class I, locus A3 (RT1-A3), mRNA	14.47	3.32	3.9e-10
XM_017588642.2	Sbk1	SH3 domain binding kinase 1 (Sbk1), transcript variant X1, mRNA	4.34	3.42	3.9e-10
XM_008764508.2	Ypel5	yippee-like 5 (Ypel5), transcript variant X1, mRNA	18.92	2.57	4e-10
XM_039095672.1	Mylip	myosin regulatory light chain interacting protein (Mylip), transcript variant X1, mRNA	5.2	-6.75	4e-10
XM_039086615.1	Nlk	nemo like kinase (Nlk), transcript variant X2, mRNA	12.19	2.75	4.1e-10
NM_031012.1	Anpep	alanyl aminopeptidase, membrane (Anpep), mRNA	34.82	-3.29	4.1e-10
XM_340803.8	Sap30l	SAP30-like (Sap30l), transcript variant X1, mRNA	9.74	2.27	4.2e-10
NM_145778.2	Tubg1	tubulin, gamma 1 (Tubg1), mRNA	26.85	-3.17	4.5e-10
XM_006257064.4	Gdpd2	glycerophosphodiester phosphodiesterase domain containing 2 (Gdpd2), transcript variant X1, mRNA	0.87	36.34	4.6e-10
XM_008765201.3	Marchf2	membrane associated ring-CH-type finger 2 (Marchf2), transcript variant X4, mRNA	6.36	4.51	4.6e-10
NM_053485.2	S100a6	S100 calcium binding protein A6 (S100a6), mRNA	130.62	-4.61	4.7e-10
NM_012504.1	Atp1a1	ATPase Na+/K+ transporting subunit alpha 1 (Atp1a1), mRNA	82.76	-2.38	4.7e-10
XM_008771502.3	Sfxn1	sideroflexin 1 (Sfxn1), transcript variant X1, mRNA	8.11	2.84	4.8e-10
XM_017598517.2	Hvcn1	hydrogen voltage-gated channel 1 (Hvcn1), transcript variant X1, mRNA	18.46	-5.39	4.8e-10
XM_006236227.3	Tspan33	tetraspanin 33 (Tspan33), transcript variant X1, mRNA	5.02	5.23	4.8e-10
NM_053924.1	Abcc5	ATP binding cassette subfamily C member 5 (Abcc5), mRNA	11.29	-2.89	4.8e-10
NM_001135017.1	Myl12a	myosin light chain 12A (Myl12a), mRNA	85.5	2.17	4.9e-10
XM_039088806.1	Grk5	G protein-coupled receptor kinase 5 (Grk5), transcript variant X3, mRNA	3.98	4.14	5e-10
XM_039091410.1	LOC100362384	ferritin light chain 1-like (LOC100362384), mRNA	9.65	5.57	5.1e-10
XM_006253786.4	Nedd9	neural precursor cell expressed, developmentally down-regulated 9 (Nedd9), transcript variant X1, mRNA	15.6	-3.59	5.1e-10
NM_001111098.1	Lyn	LYN proto-oncogene, Src family tyrosine kinase (Lyn), transcript variant 2, mRNA	21.64	2.25	5.1e-10
XM_039100211.1	Nhsl2	NHS-like 2 (Nhsl2), transcript variant X3, mRNA	0.82	-560.95	5.1e-10
NM_001113497.1	Septin9	septin 9 (Septin9), transcript variant 3, mRNA	62.47	-12.87	5.4e-10
XR_354237.4	LOC102553361	uncharacterized LOC102553361 (LOC102553361), ncRNA	8.31	6.33	5.4e-10
NM_053985.2	H3f3b	H3.3 histone B (H3f3b), mRNA	294.47	2.14	5.5e-10
XM_006243608.3	Nmnat3	nicotinamide nucleotide adenylyltransferase 3 (Nmnat3), transcript variant X1, mRNA	2.72	13.26	5.5e-10
XM_039081636.1	Ehd2	EH-domain containing 2 (Ehd2), transcript variant X1, mRNA	2.01	7.44	5.5e-10
XM_039108385.1	Klra17	killer cell lectin-like receptor, subfamily A, member 17 (Klra17), transcript variant X1, mRNA	11.54	-14.38	5.8e-10
XM_001056825.6	Golm1	golgi membrane protein 1 (Golm1), transcript variant X1, mRNA	11.36	-8.33	5.8e-10
NM_001106210.1	Rnaset2	ribonuclease T2 (Rnaset2), mRNA	60.21	2.58	5.9e-10
XM_039091944.1	Fbxl5	F-box and leucine-rich repeat protein 5 (Fbxl5), transcript variant X2, mRNA	52.39	2.9	6e-10
NM_001108076.2	Myo1f	myosin IF (Myo1f), mRNA	105.59	-3.22	6.1e-10
NR_002597.1	LOC360231	MHC class I RT1.O type 149 processed pseudogene (LOC360231), non-coding RNA	7.76	3.64	6.2e-10
NM_001109013.1	Praf2	PRA1 domain family, member 2 (Praf2), mRNA	19.61	3.63	6.2e-10
XR_001836893.2	LOC108350102	uncharacterized LOC108350102 (LOC108350102), ncRNA	6.77	4.3	6.3e-10
XM_008765513.3	St3gal1	ST3 beta-galactoside alpha-2,3-sialyltransferase 1 (St3gal1), transcript variant X3, mRNA	12.59	2.71	6.4e-10
NM_001173429.1	Septin6	septin 6 (Septin6), mRNA	73.09	-2.45	6.4e-10
NM_021744.1	Cd14	CD14 molecule (Cd14), mRNA	13.28	5.14	6.5e-10
XM_006238862.3	Ago4	argonaute RISC component 4 (Ago4), transcript variant X1, mRNA	7.81	-5.88	6.6e-10
NM_198131.1	Tlr9	toll-like receptor 9 (Tlr9), mRNA	6.21	-5.85	6.9e-10
XM_017592764.2	Eogt	EGF domain specific O-linked N-acetylglucosamine transferase (Eogt), transcript variant X1, mRNA	1.53	-56.04	7e-10
XR_001839448.2	LOC102551907	uncharacterized LOC102551907 (LOC102551907), transcript variant X1, ncRNA	13.97	8.92	7e-10
NM_130812.3	Cdkn2b	cyclin-dependent kinase inhibitor 2B (Cdkn2b), mRNA	1.04	16.82	7.2e-10
NM_022210.1	Max	MYC associated factor X (Max), mRNA	42.86	3.11	7.3e-10
XM_216543.9	Pithd1	PITH domain containing 1 (Pithd1), mRNA	10.91	4.1	7.6e-10
XM_006252319.3	Lcp1	lymphocyte cytosolic protein 1 (Lcp1), transcript variant X1, mRNA	32.22	-4.35	7.8e-10
XM_039089486.1	Xylt1	xylosyltransferase 1 (Xylt1), transcript variant X1, mRNA	4.39	-3.4	7.8e-10
XM_006243996.4	Tmie	transmembrane inner ear (Tmie), transcript variant X3, mRNA	6.94	6.42	7.9e-10
XM_039108346.1	Tmem40	transmembrane protein 40 (Tmem40), transcript variant X2, mRNA	1.4	73.83	7.9e-10
XM_006239517.4	Gnb1	G protein subunit beta 1 (Gnb1), transcript variant X1, mRNA	2.98	-182.64	8e-10
NM_001106622.1	Tapbpl	TAP binding protein-like (Tapbpl), mRNA	26.8	2.25	8e-10
XM_002728083.6	Rasgef1b	RasGEF domain family, member 1B (Rasgef1b), transcript variant X4, mRNA	10.36	3.46	8.2e-10
XM_006248184.2	Sh3bgr	SH3 domain binding glutamate-rich protein (Sh3bgr), transcript variant X1, mRNA	5.01	6.22	8.3e-10
XM_039094065.1	Slc6a16	solute carrier family 6, member 16 (Slc6a16), transcript variant X1, mRNA	6.43	-5.51	8.4e-10
NM_001134780.1	Parvb	parvin, beta (Parvb), mRNA	8.51	5.57	8.4e-10
NM_012809.2	Cnp	2',3'-cyclic nucleotide 3' phosphodiesterase (Cnp), mRNA	45.15	2.24	8.4e-10
NR_102354.1	Patz1	POZ (BTB) and AT hook containing zinc finger 1 (Patz1), transcript variant 5, non-coding RNA	20.1	2.97	8.6e-10
XM_039106518.1	Zfp106	zinc finger protein 106 (Zfp106), transcript variant X1, mRNA	29.45	-2.07	8.8e-10
NM_001130573.1	Maff	MAF bZIP transcription factor F (Maff), mRNA	6.17	4.44	8.9e-10
XM_039082947.1	Il1r2	interleukin 1 receptor type 2 (Il1r2), transcript variant X1, mRNA	6.59	7.06	9e-10
NM_001107712.2	Cttnbp2nl	CTTNBP2 N-terminal like (Cttnbp2nl), mRNA	2.91	3.36	9e-10
XR_005502196.1	LOC120101563	uncharacterized LOC120101563 (LOC120101563), transcript variant X2, ncRNA	3.32	8.19	9e-10
XM_039099953.1	Btk	Bruton tyrosine kinase (Btk), transcript variant X3, mRNA	2.13	14.32	9.1e-10
XM_006241569.2	Azin1	antizyme inhibitor 1 (Azin1), transcript variant X3, mRNA	7.27	3.19	9.1e-10
NM_001108422.2	Plxdc2	plexin domain containing 2 (Plxdc2), mRNA	22.17	-3.26	9.4e-10
NM_012708.2	Psmb9	proteasome 20S subunit beta 9 (Psmb9), mRNA	66.3	2.1	9.5e-10
XM_006250696.4	Anxa3	annexin A3 (Anxa3), transcript variant X5, mRNA	2.71	8.33	9.7e-10
XM_006241265.4	Elk3	ETS transcription factor ELK3 (Elk3), transcript variant X1, mRNA	30.27	-2.43	9.7e-10
XM_017594666.2	Tmbim6	transmembrane BAX inhibitor motif containing 6 (Tmbim6), transcript variant X1, mRNA	48.96	2.03	9.9e-10
XM_039086071.1	Abi3	ABI family, member 3 (Abi3), transcript variant X1, mRNA	8.35	-12.11	9.9e-10
XM_039107047.1	Tax1bp1	Tax1 binding protein 1 (Tax1bp1), transcript variant X10, mRNA	218.87	2.2	1e-09
XM_039082019.1	Pfkfb4	6-phosphofructo-2-kinase/fructose-2,6-biphosphatase 4 (Pfkfb4), transcript variant X15, mRNA	4.68	-10.88	1e-09
XM_039108701.1	Dtx4	deltex E3 ubiquitin ligase 4 (Dtx4), transcript variant X4, mRNA	2.71	-25.45	1e-09
XM_039079667.1	Uhrf1bp1l	UHRF1 binding protein 1-like (Uhrf1bp1l), transcript variant X2, mRNA	4.92	4.21	1.1e-09
XM_039089958.1	Card11	caspase recruitment domain family, member 11 (Card11), transcript variant X1, mRNA	40.79	-2.34	1.1e-09
XM_006244700.3	LOC102551518	uncharacterized LOC102551518 (LOC102551518), transcript variant X2, mRNA	9.2	2.7	1.1e-09
XM_006249701.4	Zranb3	zinc finger RANBP2-type containing 3 (Zranb3), transcript variant X1, mRNA	0.63	44.04	1.1e-09
XM_001072378.6	Klrg2	killer cell lectin like receptor G2 (Klrg2), transcript variant X1, mRNA	3.23	4.08	1.1e-09
XM_039092659.1	Bmp2k	BMP-2 inducible kinase (Bmp2k), transcript variant X2, mRNA	12.24	-2.69	1.1e-09
XM_006244600.4	Enpp4	ectonucleotide pyrophosphatase/phosphodiesterase 4 (Enpp4), transcript variant X2, mRNA	3.02	5.47	1.1e-09
NM_001107891.1	Ppp2r5a	protein phosphatase 2, regulatory subunit B', alpha (Ppp2r5a), mRNA	102.16	-2.07	1.1e-09
XM_039093398.1	Acod1	aconitate decarboxylase 1 (Acod1), transcript variant X4, mRNA	7.47	7824.85	1.2e-09
NM_001007673.1	Mmd	monocyte to macrophage differentiation-associated (Mmd), mRNA	13.18	2.46	1.2e-09
XM_008758601.2	Stx11	syntaxin 11 (Stx11), transcript variant X1, mRNA	8.04	3.46	1.2e-09
XM_039085453.1	Tnfsf13	TNF superfamily member 13 (Tnfsf13), transcript variant X4, mRNA	12.6	-28.03	1.2e-09
XM_017588678.2	Il16	interleukin 16 (Il16), transcript variant X8, mRNA	26.35	-2.46	1.2e-09
NM_001107743.1	Slc43a3	solute carrier family 43, member 3 (Slc43a3), mRNA	26.15	-4.17	1.2e-09
XM_039091432.1	LOC102556096	pyrin domain-containing protein 3-like (LOC102556096), transcript variant X5, mRNA	1.76	10.29	1.2e-09
NM_001007612.1	Ccl7	C-C motif chemokine ligand 7 (Ccl7), mRNA	3.15	260.89	1.2e-09
XM_006250998.4	Rell1	RELT-like 1 (Rell1), transcript variant X1, mRNA	10.41	-3.75	1.2e-09
XR_351142.4	Pdcd4	programmed cell death 4 (Pdcd4), transcript variant X5, misc_RNA	101.73	-2.61	1.3e-09
XM_006228503.4	Relb	RELB proto-oncogene, NF-kB subunit (Relb), transcript variant X2, mRNA	7.22	4.38	1.3e-09
XM_006244735.4	Uggt1	UDP-glucose glycoprotein glucosyltransferase 1 (Uggt1), transcript variant X1, mRNA	25.09	-2.22	1.3e-09
NM_001106236.1	Blvrb	biliverdin reductase B (Blvrb), mRNA	15.4	4.81	1.3e-09
NM_017002.2	Epor	erythropoietin receptor (Epor), mRNA	3.45	6.67	1.3e-09
XM_039095875.1	Tmem170b	transmembrane protein 170B (Tmem170b), transcript variant X1, mRNA	12.27	-2.3	1.3e-09
NM_153628.2	Sec11c	SEC11 homolog C, signal peptidase complex subunit (Sec11c), mRNA	43.46	2.54	1.3e-09
XM_006234396.4	Nfe2l2	nuclear factor, erythroid 2-like 2 (Nfe2l2), transcript variant X1, mRNA	20.97	2.63	1.4e-09
NM_001007149.1	Stau2	staufen double-stranded RNA binding protein 2 (Stau2), transcript variant LL, mRNA	80.16	2.31	1.4e-09
NM_019358.2	Pdpn	podoplanin (Pdpn), mRNA	1.15	23.7	1.4e-09
NM_012671.2	Tgfa	transforming growth factor alpha (Tgfa), mRNA	1.84	-19.88	1.4e-09
NM_001037355.1	Mettl7a	methyltransferase like 7A (Mettl7a), mRNA	8.39	-8.03	1.5e-09
NM_057115.2	Ptpn12	protein tyrosine phosphatase, non-receptor type 12 (Ptpn12), mRNA	35.79	2.38	1.5e-09
XM_006237572.4	Ptpro	protein tyrosine phosphatase, receptor type, O (Ptpro), transcript variant X5, mRNA	23.02	-11.16	1.7e-09
XM_006242665.4	S1pr5	sphingosine-1-phosphate receptor 5 (S1pr5), transcript variant X4, mRNA	13.76	-3.17	1.7e-09
XM_039088370.1	Nfkbiz	NFKB inhibitor zeta (Nfkbiz), transcript variant X2, mRNA	2.5	16.14	1.7e-09
XM_039080679.1	Atad1	ATPase family, AAA domain containing 1 (Atad1), transcript variant X4, mRNA	19.67	2.98	1.7e-09
NM_001107748.1	Slc35c1	solute carrier family 35 member C1 (Slc35c1), mRNA	38.24	-2.25	1.7e-09
XM_006233424.4	Gbp4	guanylate binding protein 4 (Gbp4), transcript variant X1, mRNA	2.53	6.93	1.8e-09
XM_039079015.1	Plekhj1	pleckstrin homology domain containing J1 (Plekhj1), transcript variant X5, mRNA	6.49	6.31	1.8e-09
XM_039087727.1	Mllt6	MLLT6, PHD finger containing (Mllt6), transcript variant X4, mRNA	11.95	2.13	1.9e-09
XM_006234385.4	Lnpk	lunapark, ER junction formation factor (Lnpk), transcript variant X9, mRNA	1.77	11.33	1.9e-09
XM_006236295.4	Zc3hav1	zinc finger CCCH-type containing, antiviral 1 (Zc3hav1), transcript variant X1, mRNA	42.95	2.05	1.9e-09
NM_001351981.1	Txnrd1	thioredoxin reductase 1 (Txnrd1), transcript variant 2, mRNA	3.07	6.38	1.9e-09
XM_039086904.1	Pacrg	parkin coregulated (Pacrg), transcript variant X1, mRNA	19.55	2.93	1.9e-09
NM_001100669.1	Smap2	small ArfGAP2 (Smap2), mRNA	253.25	-2.23	1.9e-09
NM_001013916.1	Cd302	CD302 molecule (Cd302), mRNA	46.56	2.44	2e-09
NM_001008839.1	RT1-CE16	RT1 class I, locus CE16 (RT1-CE16), mRNA	200.49	2.14	2e-09
NM_001012648.1	Klri2	killer cell lectin-like receptor family I member 2 (Klri2), mRNA	47.78	2.68	2e-09
XM_006235148.4	Rin2	Ras and Rab interactor 2 (Rin2), transcript variant X5, mRNA	2.28	11.55	2e-09
NM_001034958.2	Fam104a	family with sequence similarity 104, member A (Fam104a), mRNA	18.47	2.48	2e-09
XM_039089036.1	Flt3	Fms related receptor tyrosine kinase 3 (Flt3), transcript variant X1, mRNA	1.85	-68.84	2e-09
XM_006228238.4	Lilrb4	leukocyte immunoglobulin like receptor B4 (Lilrb4), transcript variant X1, mRNA	81.38	-27.74	2e-09
NM_198199.1	Qrfpr	pyroglutamylated RFamide peptide receptor (Qrfpr), mRNA	4.4	-180.17	2.1e-09
XM_006254373.4	Gpr137b	G protein-coupled receptor 137B (Gpr137b), transcript variant X2, mRNA	6	-3.4	2.1e-09
XM_039088352.1	Parp9	poly (ADP-ribose) polymerase family, member 9 (Parp9), transcript variant X16, mRNA	2.21	3.61	2.1e-09
XM_006251487.3	Upp1	uridine phosphorylase 1 (Upp1), transcript variant X8, mRNA	2.71	12.17	2.1e-09
XM_039085197.1	Mical2	microtubule associated monooxygenase, calponin and LIM domain containing 2 (Mical2), transcript variant X3, mRNA	3.31	2.89	2.1e-09
XM_006242662.4	Shfl	shiftless antiviral inhibitor of ribosomal frameshifting (Shfl), transcript variant X2, mRNA	6.7	5.31	2.1e-09
XM_006243966.3	Ccrl2	C-C motif chemokine receptor like 2 (Ccrl2), transcript variant X2, mRNA	3.33	8.59	2.2e-09
XR_001841798.2	LOC108348513	uncharacterized LOC108348513 (LOC108348513), transcript variant X1, ncRNA	53.44	2.13	2.2e-09
XM_008763324.3	Klrc3	killer cell lectin like receptor C3 (Klrc3), transcript variant X1, mRNA	18.86	2.65	2.2e-09
XM_039091824.1	Arhgap24	Rho GTPase activating protein 24 (Arhgap24), transcript variant X3, mRNA	3.72	-23.89	2.3e-09
NM_001037358.2	Lmo2	LIM domain only 2 (Lmo2), transcript variant 1, mRNA	37.02	-3.48	2.3e-09
XM_039099699.1	Upf3b	UPF3B, regulator of nonsense mediated mRNA decay (Upf3b), transcript variant X4, mRNA	3.87	-146.81	2.3e-09
XM_017592759.2	Ly49si2	immunoreceptor Ly49si2 (Ly49si2), transcript variant X4, mRNA	2.46	-8	2.4e-09
XM_039094599.1	Erich1	glutamate-rich 1 (Erich1), transcript variant X4, mRNA	2.18	9.49	2.5e-09
XR_005503855.1	LOC108350756	uncharacterized LOC108350756 (LOC108350756), transcript variant X3, ncRNA	1.2	3.98	2.5e-09
NM_001105725.2	Ccng2	cyclin G2 (Ccng2), mRNA	41.91	-2.25	2.5e-09
XM_039112549.1	Eml1	EMAP like 1 (Eml1), transcript variant X4, mRNA	0.63	387.16	2.5e-09
NM_001127602.1	Slc25a53	solute carrier family 25, member 53 (Slc25a53), mRNA	3.14	-449.34	2.6e-09
XM_039090607.1	Kif21b	kinesin family member 21B (Kif21b), transcript variant X6, mRNA	10.83	-3.74	2.6e-09
NM_031643.4	Map2k1	mitogen activated protein kinase kinase 1 (Map2k1), mRNA	16.81	2.3	2.6e-09
XM_006230382.4	Itgax	integrin subunit alpha X (Itgax), transcript variant X3, mRNA	18.69	2.46	2.6e-09
XM_006256128.4	Cdkn1a	cyclin-dependent kinase inhibitor 1A (Cdkn1a), transcript variant X1, mRNA	8.71	4.34	2.6e-09
NM_001191924.2	Nlk	nemo like kinase (Nlk), mRNA	9.53	2.72	2.6e-09
NM_001007732.1	Serpinb9	serpin family B member 9 (Serpinb9), mRNA	35.98	2.41	2.7e-09
XM_006236490.2	Snx10	sorting nexin 10 (Snx10), transcript variant X4, mRNA	5.32	6.07	2.7e-09
XM_008762788.3	Tspan12	tetraspanin 12 (Tspan12), transcript variant X1, mRNA	7.44	3.23	2.7e-09
XM_006236304.4	Mkrn1	makorin ring finger protein 1 (Mkrn1), transcript variant X4, mRNA	16.56	2.67	2.8e-09
NM_057138.3	Cflar	CASP8 and FADD-like apoptosis regulator (Cflar), transcript variant 2, mRNA	6.47	3.98	2.8e-09
XM_017593893.2	Ski	SKI proto-oncogene (Ski), transcript variant X1, mRNA	14.11	-2.38	2.8e-09
XM_039097405.1	Arap3	ArfGAP with RhoGAP domain, ankyrin repeat and PH domain 3 (Arap3), transcript variant X4, mRNA	5.47	-4.74	2.9e-09
XM_039078583.1	Tle5	TLE family member 5, transcriptional modulator (Tle5), transcript variant X1, mRNA	98.33	2.44	2.9e-09
NM_130422.1	Casp12	caspase 12 (Casp12), mRNA	3.12	11.29	2.9e-09
NM_001015026.1	Tspan12	tetraspanin 12 (Tspan12), mRNA	4.57	3.67	2.9e-09
XM_039103606.1	Skil	SKI-like proto-oncogene (Skil), transcript variant X3, mRNA	2.36	4.24	3e-09
XM_006239623.4	Crim1	cysteine rich transmembrane BMP regulator 1 (Crim1), transcript variant X1, mRNA	2.37	5.61	3e-09
XM_006257453.4	Dock11	dedicator of cytokinesis 11 (Dock11), transcript variant X1, mRNA	8.75	-4	3.1e-09
NM_012771.3	Lyz2	lysozyme 2 (Lyz2), mRNA	1141.5	-2.89	3.1e-09
XR_005493476.1	LOC120096689	uncharacterized LOC120096689 (LOC120096689), transcript variant X6, misc_RNA	1.89	5.18	3.2e-09
XM_008769426.3	Il10	interleukin 10 (Il10), transcript variant X1, mRNA	0.43	63.64	3.2e-09
XM_039094531.1	Mtmr7	myotubularin related protein 7 (Mtmr7), transcript variant X4, mRNA	0.96	42.72	3.3e-09
NM_001025655.1	Cmpk1	cytidine/uridine monophosphate kinase 1 (Cmpk1), mRNA	140.17	2.28	3.4e-09
XR_005495459.1	LOC120097756	uncharacterized LOC120097756 (LOC120097756), transcript variant X1, ncRNA	17.46	-17.32	3.4e-09
XM_008767078.3	Cd28	Cd28 molecule (Cd28), transcript variant X1, mRNA	23.28	-2.66	3.4e-09
NM_013190.4	Pfkl	phosphofructokinase, liver type (Pfkl), mRNA	12.39	2.68	3.5e-09
XR_594124.3	LOC100911671	uncharacterized LOC100911671 (LOC100911671), ncRNA	10.66	-11.79	3.5e-09
XM_039087909.1	Abcc5	ATP binding cassette subfamily C member 5 (Abcc5), transcript variant X8, mRNA	9.43	-3.39	3.6e-09
XM_006255199.4	Rbl2	RB transcriptional corepressor like 2 (Rbl2), transcript variant X1, mRNA	10.72	-3.12	3.7e-09
XR_005496019.1	Ap3s1	adaptor related protein complex 3 subunit sigma 1 (Ap3s1), transcript variant X4, misc_RNA	39.44	2.81	3.7e-09
NM_199094.2	Tubb4b	tubulin, beta 4B class IVb (Tubb4b), mRNA	58.71	2.25	3.7e-09
XM_039103815.1	Tafa3	TAFA chemokine like family member 3 (Tafa3), transcript variant X1, mRNA	18.47	-3.35	3.8e-09
XM_006255277.4	Rad23a	RAD23 homolog A, nucleotide excision repair protein (Rad23a), transcript variant X3, mRNA	8.13	3.82	3.8e-09
XM_006230450.4	Ptpre	protein tyrosine phosphatase, receptor type, E (Ptpre), transcript variant X5, mRNA	13.17	-2.67	4e-09
XM_006229752.3	Pak1	p21 (RAC1) activated kinase 1 (Pak1), transcript variant X1, mRNA	7.12	-21.62	4e-09
NM_001106651.1	Snx30	sorting nexin family member 30 (Snx30), mRNA	5.91	-5.9	4e-09
XM_039083360.1	Cyp27a1	cytochrome P450, family 27, subfamily a, polypeptide 1 (Cyp27a1), transcript variant X2, mRNA	1.5	23.22	4.1e-09
XR_005497501.1	LOC120098851	uncharacterized LOC120098851 (LOC120098851), ncRNA	0.47	37.18	4.3e-09
XM_039098435.1	Hk1	hexokinase 1 (Hk1), transcript variant X4, mRNA	26.4	2.11	4.4e-09
NM_001009480.1	Uqcrh	ubiquinol-cytochrome c reductase hinge protein (Uqcrh), mRNA; nuclear gene for mitochondrial product	237.48	2.49	4.4e-09
XM_579785.7	RGD1562339	RGD1562339 (RGD1562339), mRNA	2.5	-13.7	4.5e-09
XM_039106697.1	Chmp4b	charged multivesicular body protein 4B (Chmp4b), mRNA	111.08	2.47	4.6e-09
XR_005494676.1	LOC102556290	nipped-B-like protein B-like (LOC102556290), misc_RNA	11.93	5.65	4.6e-09
NM_001024272.1	Phf11	PHD finger protein 11 (Phf11), mRNA	3.4	7.09	4.6e-09
XM_006248538.4	Dgkg	diacylglycerol kinase, gamma (Dgkg), transcript variant X2, mRNA	7.3	-3.61	4.6e-09
NM_022232.1	Dnajc3	DnaJ heat shock protein family (Hsp40) member C3 (Dnajc3), mRNA	55.35	2.06	4.7e-09
XM_006240016.4	Atxn7l1	ataxin 7-like 1 (Atxn7l1), transcript variant X13, mRNA	6.96	-3.97	4.7e-09
XM_006238881.4	Stk40	serine/threonine kinase 40 (Stk40), transcript variant X1, mRNA	3.45	3.34	4.8e-09
NM_001129880.3	Lbh	LBH regulator of WNT signaling pathway (Lbh), mRNA	46.8	-2.17	4.8e-09
NM_001126289.2	Dennd1c	DENN domain containing 1C (Dennd1c), mRNA	119.15	-2.24	4.9e-09
XM_576451.7	Slc25a36	solute carrier family 25 member 36 (Slc25a36), transcript variant X1, mRNA	12.3	-2.91	5e-09
NM_022525.4	Gpx3	glutathione peroxidase 3 (Gpx3), mRNA	13.69	2.85	5.2e-09
NM_001106224.2	Ube2s	ubiquitin-conjugating enzyme E2S (Ube2s), mRNA	42.35	2.35	5.2e-09
NM_139115.2	Coro6	coronin 6 (Coro6), mRNA	2.54	-24.19	5.2e-09
NM_001135767.1	Gngt2	G protein subunit gamma transducin 2 (Gngt2), mRNA	8.15	-53.45	5.2e-09
XM_039082355.1	Cep164	centrosomal protein 164 (Cep164), transcript variant X5, mRNA	5.48	-4	5.3e-09
XM_039111260.1	Epb41	erythrocyte membrane protein band 4.1 (Epb41), transcript variant X21, mRNA	8.83	2.59	5.3e-09
XM_006232538.4	Tmem154	transmembrane protein 154 (Tmem154), transcript variant X1, mRNA	55.46	-2.35	5.3e-09
XM_006232744.4	Adam15	ADAM metallopeptidase domain 15 (Adam15), transcript variant X5, mRNA	1.73	-58.99	5.3e-09
XM_017600930.2	Ndst1	N-deacetylase and N-sulfotransferase 1 (Ndst1), transcript variant X2, mRNA	1.68	-14.42	5.3e-09
XM_006242911.4	Fxyd2	FXYD domain-containing ion transport regulator 2 (Fxyd2), transcript variant X1, mRNA	41.66	-15.14	5.3e-09
XM_006255626.4	St3gal2	ST3 beta-galactoside alpha-2,3-sialyltransferase 2 (St3gal2), transcript variant X2, mRNA	3.21	5.95	5.4e-09
NM_053634.1	Fcnb	ficolin B (Fcnb), mRNA	336.08	-6.75	5.5e-09
XM_006256561.4	Sesn1	sestrin 1 (Sesn1), transcript variant X2, mRNA	38.32	-2.83	5.5e-09
NM_001135718.1	Prex1	phosphatidylinositol-3,4,5-trisphosphate-dependent Rac exchange factor 1 (Prex1), mRNA	71.22	-2.53	5.5e-09
XM_006234861.4	Serf2	small EDRK-rich factor 2 (Serf2), transcript variant X1, mRNA	46.32	2.65	5.6e-09
NM_013141.2	Ppard	peroxisome proliferator-activated receptor delta (Ppard), mRNA	7.59	3	5.6e-09
NM_001004224.1	Bcap31	B-cell receptor-associated protein 31 (Bcap31), mRNA	102.25	2.07	5.6e-09
XM_001065610.7	Jazf1	JAZF zinc finger 1 (Jazf1), transcript variant X1, mRNA	9.14	2.51	5.6e-09
NM_001100836.1	Fcgr1a	Fc fragment of IgG receptor Ia (Fcgr1a), mRNA	41.43	2.65	5.7e-09
NM_001012127.1	Mapkapk3	MAPK activated protein kinase 3 (Mapkapk3), mRNA	4.44	-38.63	5.7e-09
XM_006237571.4	Ptpro	protein tyrosine phosphatase, receptor type, O (Ptpro), transcript variant X4, mRNA	17.6	-4.85	5.8e-09
XM_006228822.4	Ffar2	free fatty acid receptor 2 (Ffar2), transcript variant X1, mRNA	2.29	7.82	6e-09
XM_008770279.3	Limk2	LIM domain kinase 2 (Limk2), transcript variant X7, mRNA	1.33	13.95	6e-09
NM_013013.2	Psap	prosaposin (Psap), transcript variant 1, mRNA	350.03	-2.41	6.1e-09
XM_006237088.4	Clec1b	C-type lectin domain family 1, member B (Clec1b), transcript variant X1, mRNA	12	3.67	6.1e-09
XM_006244601.4	Enpp4	ectonucleotide pyrophosphatase/phosphodiesterase 4 (Enpp4), transcript variant X3, mRNA	2.28	6.14	6.1e-09
NM_053445.2	Fads1	fatty acid desaturase 1 (Fads1), mRNA	3.7	3.6	6.4e-09
XR_001837725.2	LOC100912974	uncharacterized LOC100912974 (LOC100912974), transcript variant X1, ncRNA	19.32	-3.39	6.5e-09
XM_039101876.1	Sh3glb1	SH3 domain -containing GRB2-like endophilin B1 (Sh3glb1), transcript variant X6, mRNA	3.4	8.6	6.6e-09
XM_008770470.3	Ccdc88a	coiled coil domain containing 88A (Ccdc88a), transcript variant X3, mRNA	0.57	-56.85	6.7e-09
XM_039094994.1	LOC120097436	HAUS augmin-like complex subunit 8 (LOC120097436), transcript variant X4, mRNA	1.91	10.21	6.7e-09
XM_039102024.1	Rxfp1	relaxin family peptide receptor 1 (Rxfp1), transcript variant X4, mRNA	0.31	28.6	6.7e-09
NM_022185.2	Pik3r2	phosphoinositide-3-kinase regulatory subunit 2 (Pik3r2), mRNA	10.23	-4.46	6.7e-09
XM_039100210.1	Nhsl2	NHS-like 2 (Nhsl2), transcript variant X2, mRNA	3.93	-3.5	6.7e-09
XM_039105214.1	Gfi1b	growth factor independent 1B transcriptional repressor (Gfi1b), transcript variant X3, mRNA	9.7	2.9	6.7e-09
XM_039107529.1	Ahsp	alpha hemoglobin stabilizing protein (Ahsp), transcript variant X2, mRNA	11.6	8	7.1e-09
XR_005500980.1	LOC120100831	uncharacterized LOC120100831 (LOC120100831), ncRNA	14.59	2.37	7.2e-09
XM_039104357.1	Tank	TRAF family member-associated NFKB activator (Tank), transcript variant X10, mRNA	6.24	5.06	7.3e-09
NM_138827.2	Slc2a1	solute carrier family 2 member 1 (Slc2a1), mRNA	13.82	3.02	7.4e-09
NM_001013082.1	Pon2	paraoxonase 2 (Pon2), mRNA	59.47	-2.18	7.5e-09
NM_001107074.1	Cd7	Cd7 molecule (Cd7), mRNA	42	-4.01	7.7e-09
NM_001109535.1	Rab20	RAB20, member RAS oncogene family (Rab20), mRNA	9.56	3.98	7.7e-09
NM_001127639.1	Gba	glucosylceramidase beta (Gba), mRNA	43.46	-2.31	7.7e-09
XM_006255025.4	Cd226	CD226 molecule (Cd226), transcript variant X1, mRNA	22.01	2.33	7.8e-09
XM_039109026.1	Cntnap2	contactin associated protein 2 (Cntnap2), transcript variant X2, mRNA	1.67	3.44	7.8e-09
XR_005500243.1	Arsb	arylsulfatase B (Arsb), transcript variant X2, misc_RNA	7.2	2.79	7.8e-09
XM_006229898.4	Arap1	ArfGAP with RhoGAP domain, ankyrin repeat and PH domain 1 (Arap1), transcript variant X3, mRNA	11.51	-4.77	7.8e-09
NM_013138.2	Itpr3	inositol 1,4,5-trisphosphate receptor, type 3 (Itpr3), mRNA	6.4	-3.42	7.9e-09
NM_138975.1	Wbp2	WW domain binding protein 2 (Wbp2), mRNA	351.85	2.3	8.1e-09
NM_001109299.1	Tmie	transmembrane inner ear (Tmie), mRNA	2.87	5.88	8.1e-09
XM_006230953.4	Batf2	basic leucine zipper ATF-like transcription factor 2 (Batf2), transcript variant X1, mRNA	1.27	42.48	8.2e-09
XM_006233311.4	Sgms2	sphingomyelin synthase 2 (Sgms2), transcript variant X1, mRNA	11.91	2.39	8.3e-09
NM_053905.2	Lmnb1	lamin B1 (Lmnb1), mRNA	22.47	2.12	8.6e-09
NM_017020.3	Il6r	interleukin 6 receptor (Il6r), mRNA	26.64	-2.9	8.7e-09
NM_001135875.1	Ranbp10	RAN binding protein 10 (Ranbp10), mRNA	12.62	4.26	8.7e-09
XM_006248341.4	Btla	B and T lymphocyte associated (Btla), transcript variant X1, mRNA	15.35	-2.58	8.8e-09
NM_017079.1	Cd1d1	CD1d1 molecule (Cd1d1), mRNA	16.16	-3.41	9e-09
XM_039095289.1	Tgfbi	transforming growth factor, beta induced (Tgfbi), transcript variant X1, mRNA	3.44	-31.81	9.1e-09
XM_006237314.4	C3ar1	complement C3a receptor 1 (C3ar1), transcript variant X1, mRNA	9.73	-5.77	9.3e-09
NM_001108826.1	Tnip1	TNFAIP3 interacting protein 1 (Tnip1), mRNA	2.45	8.18	9.5e-09
NM_001005552.1	MGC95208	similar to 4930453N24Rik protein (MGC95208), mRNA	13.46	2.96	9.6e-09
XM_006251364.4	Lif	LIF, interleukin 6 family cytokine (Lif), transcript variant X2, mRNA	0.35	69.48	9.8e-09
XM_039098393.1	Daxx	death-domain associated protein (Daxx), transcript variant X11, mRNA	7.51	3.26	9.8e-09
XM_006238363.4	Acer2	alkaline ceramidase 2 (Acer2), transcript variant X1, mRNA	4.08	7.43	9.9e-09
XM_039099954.1	Btk	Bruton tyrosine kinase (Btk), transcript variant X4, mRNA	2.26	8.51	9.9e-09
XM_039087479.1	Ube2o	ubiquitin-conjugating enzyme E2O (Ube2o), transcript variant X3, mRNA	2.27	11.97	1e-08
XM_006250181.4	Rcsd1	RCSD domain containing 1 (Rcsd1), transcript variant X1, mRNA	52.43	-2.2	1e-08
NM_017257.2	Psme2	proteasome activator subunit 2 (Psme2), mRNA	15.39	2.71	1.1e-08
XM_039084543.1	Rnf149	ring finger protein 149 (Rnf149), transcript variant X6, mRNA	18.48	-2.73	1.1e-08
XM_008768809.3	Pigz	phosphatidylinositol glycan anchor biosynthesis, class Z (Pigz), partial mRNA	2.3	7.12	1.1e-08
XM_006249856.4	Kif21b	kinesin family member 21B (Kif21b), transcript variant X4, mRNA	6.49	-4.49	1.1e-08
NM_031114.1	S100a10	S100 calcium binding protein A10 (S100a10), mRNA	281.13	-2.13	1.2e-08
XM_039101236.1	Prkcb	protein kinase C, beta (Prkcb), transcript variant X3, mRNA	35.19	-2.24	1.2e-08
XR_005497801.1	LOC120098976	uncharacterized LOC120098976 (LOC120098976), transcript variant X1, ncRNA	14.74	3.3	1.2e-08
XR_005488654.1	LOC102548661	uncharacterized LOC102548661 (LOC102548661), transcript variant X1, ncRNA	0.72	-378.03	1.2e-08
NM_017116.2	Capn2	calpain 2 (Capn2), mRNA	35.69	2.23	1.2e-08
XR_354700.3	LOC102551312	uncharacterized LOC102551312 (LOC102551312), ncRNA	15.64	7.37	1.3e-08
XM_039107212.1	Bcat1	branched chain amino acid transaminase 1 (Bcat1), transcript variant X4, mRNA	2.79	9.82	1.3e-08
NM_001047871.1	Ifrd2	interferon-related developmental regulator 2 (Ifrd2), mRNA	9.91	3.61	1.3e-08
XM_039112352.1	Gpr68	G protein-coupled receptor 68 (Gpr68), transcript variant X1, mRNA	7.65	-9.22	1.3e-08
NM_033650.1	Agrp	agouti related neuropeptide (Agrp), mRNA	2.33	43.09	1.3e-08
XM_006232778.3	Adar	adenosine deaminase, RNA-specific (Adar), transcript variant X5, mRNA	10.1	2.19	1.3e-08
XM_006251161.2	Add1	adducin 1 (Add1), transcript variant X4, mRNA	20.87	-2.35	1.3e-08
XM_006246306.4	Tnip1	TNFAIP3 interacting protein 1 (Tnip1), transcript variant X8, mRNA	14.59	2.69	1.4e-08
XM_039109489.1	Sgk1	serum/glucocorticoid regulated kinase 1 (Sgk1), transcript variant X2, mRNA	2.91	5.22	1.4e-08
NM_131910.4	Dynlrb1	dynein light chain roadblock-type 1 (Dynlrb1), mRNA	114.33	2.16	1.4e-08
NM_001106524.1	Acss1	acyl-CoA synthetase short-chain family member 1 (Acss1), mRNA	18.34	-2.75	1.5e-08
XM_017602285.2	Arhgap6	Rho GTPase activating protein 6 (Arhgap6), transcript variant X3, mRNA	1.78	6.24	1.5e-08
XM_039092920.1	Cracd	capping protein inhibiting regulator of actin dynamics (Cracd), transcript variant X2, mRNA	2.04	6.32	1.5e-08
XM_039079135.1	Irak3	interleukin-1 receptor-associated kinase 3 (Irak3), transcript variant X6, mRNA	2.72	7.26	1.5e-08
XM_039106990.1	Prok2	prokineticin 2 (Prok2), transcript variant X1, mRNA	22.54	3.79	1.5e-08
XM_003750276.5	Smim24	small integral membrane protein 24 (Smim24), mRNA	21.22	-2.79	1.5e-08
XM_006240577.4	Tnfaip2	TNF alpha induced protein 2 (Tnfaip2), transcript variant X1, mRNA	8.1	3.48	1.5e-08
NM_001107503.1	Cd22	CD22 molecule (Cd22), mRNA	2.74	-10.31	1.5e-08
XM_006229545.4	Arhgap4	Rho GTPase activating protein 4 (Arhgap4), transcript variant X3, mRNA	37.87	-2.41	1.5e-08
XR_005490829.1	LOC120095340	uncharacterized LOC120095340 (LOC120095340), ncRNA	0.75	18.16	1.5e-08
NM_001127551.1	Lrch4	leucine rich repeats and calponin homology domain containing 4 (Lrch4), mRNA	28.19	-2.23	1.6e-08
XM_008762383.3	Ppp1r16b	protein phosphatase 1, regulatory subunit 16B (Ppp1r16b), transcript variant X1, mRNA	11.18	2.49	1.6e-08
NM_053764.2	Rgs14	regulator of G-protein signaling 14 (Rgs14), mRNA	22.58	-3.11	1.6e-08
XR_005497842.1	LOC102555751	uncharacterized LOC102555751 (LOC102555751), transcript variant X6, ncRNA	4.29	12.74	1.6e-08
NM_053390.1	Il12a	interleukin 12A (Il12a), mRNA	1.69	89.92	1.6e-08
XM_039106957.1	Olr1	oxidized low density lipoprotein receptor 1 (Olr1), transcript variant X2, mRNA	0.56	46.86	1.7e-08
NM_017337.1	Pde3a	phosphodiesterase 3A (Pde3a), mRNA	2.26	7.49	1.7e-08
XM_039113181.1	LOC100359668	ferritin light chain 2 (LOC100359668), mRNA	12.76	5.06	1.7e-08
XM_039100971.1	LOC120099809	serum amyloid A-5 protein-like (LOC120099809), mRNA	1.67	130.13	1.7e-08
XM_039090640.1	Atp2b4	ATPase plasma membrane Ca2+ transporting 4 (Atp2b4), transcript variant X1, mRNA	8.87	-4.07	1.8e-08
XR_005493294.1	LOC120096621	uncharacterized LOC120096621 (LOC120096621), transcript variant X11, misc_RNA	12.67	2.76	1.8e-08
NM_017335.1	Slc6a12	solute carrier family 6 member 12 (Slc6a12), mRNA	3.59	-15.26	1.8e-08
NM_021775.2	S1pr5	sphingosine-1-phosphate receptor 5 (S1pr5), mRNA	4.12	-49.75	1.8e-08
XM_039086768.1	Fam104a	family with sequence similarity 104, member A (Fam104a), transcript variant X6, mRNA	4.4	4.76	1.8e-08
XM_039084476.1	Treml4	triggering receptor expressed on myeloid cells-like 4 (Treml4), transcript variant X6, mRNA	9.49	-10.31	1.9e-08
NM_001108789.3	Xpo5	exportin 5 (Xpo5), mRNA	8.13	2.23	1.9e-08
NM_001008872.1	Slpil2	antileukoproteinase-like 2 (Slpil2), mRNA	5.31	16.17	1.9e-08
XM_039105872.1	Traf1	TNF receptor-associated factor 1 (Traf1), transcript variant X2, mRNA	3.84	12.7	1.9e-08
XM_039102450.1	Sgms2	sphingomyelin synthase 2 (Sgms2), transcript variant X2, mRNA	3.51	6.12	2e-08
XM_218633.10	Vsig10l	V-set and immunoglobulin domain containing 10 like (Vsig10l), mRNA	13.16	2.45	2.1e-08
XM_008766207.3	Tpm1	tropomyosin 1 (Tpm1), transcript variant X4, mRNA	1.06	96.86	2.2e-08
NM_001127573.2	Ube2r2	ubiquitin-conjugating enzyme E2R 2 (Ube2r2), mRNA	168.44	2.44	2.2e-08
XM_006254769.3	Smim3	small integral membrane protein 3 (Smim3), transcript variant X7, mRNA	2.41	8.31	2.3e-08
XM_008766851.3	Tmem151b	transmembrane protein 151B (Tmem151b), transcript variant X1, mRNA	7.68	2.47	2.3e-08
XM_008759188.2	Zbtb32	zinc finger and BTB domain containing 32 (Zbtb32), transcript variant X3, mRNA	1.54	10.74	2.4e-08
NM_199502.2	Chrdl1	chordin-like 1 (Chrdl1), mRNA	2.48	4.25	2.4e-08
NM_001312663.1	Baiap3	BAI1-associated protein 3 (Baiap3), mRNA	5.87	-4.96	2.4e-08
XM_039094605.1	Efnb2	ephrin B2 (Efnb2), transcript variant X1, mRNA	5.17	-6.54	2.4e-08
NM_001047103.1	Cadm3	cell adhesion molecule 3 (Cadm3), mRNA	3.78	-36.04	2.5e-08
XM_006256714.3	Wdr45	WD repeat domain 45 (Wdr45), transcript variant X8, mRNA	6.67	5.41	2.5e-08
NM_031785.2	Atp6ap1	ATPase H+ transporting accessory protein 1 (Atp6ap1), mRNA	78.74	-1.99	2.5e-08
NM_001009625.1	Ifi35	interferon-induced protein 35 (Ifi35), mRNA	14.86	2.82	2.5e-08
XM_039095776.1	Sfmbt2	Scm-like with four mbt domains 2 (Sfmbt2), transcript variant X6, mRNA	0.81	13.27	2.6e-08
XM_039090748.1	Tor3a	torsin family 3, member A (Tor3a), transcript variant X2, mRNA	1.46	7.9	2.6e-08
XM_039087206.1	Larp1	La ribonucleoprotein 1, translational regulator (Larp1), transcript variant X2, mRNA	19.54	2.26	2.6e-08
NM_053398.1	Gfra3	GDNF family receptor alpha 3 (Gfra3), mRNA	22.44	-3.11	2.6e-08
XM_017593806.2	Mpl	MPL proto-oncogene, thrombopoietin receptor (Mpl), transcript variant X3, mRNA	1.74	6.2	2.6e-08
NM_001170426.1	Med25	mediator complex subunit 25 (Med25), mRNA	5.72	7.78	2.7e-08
XR_005499356.1	LOC120099897	uncharacterized LOC120099897 (LOC120099897), ncRNA	5.87	-6.39	2.7e-08
XR_005504919.1	LOC120102940	uncharacterized LOC120102940 (LOC120102940), ncRNA	0.4	6.89	2.7e-08
NM_012551.2	Egr1	early growth response 1 (Egr1), mRNA	12.84	3.67	2.7e-08
NM_001047092.1	Amz1	archaelysin family metallopeptidase 1 (Amz1), mRNA	4.3	-343.28	2.8e-08
XR_005487740.1	Casp4	caspase 4 (Casp4), transcript variant X2, misc_RNA	6.98	5.08	2.8e-08
XM_017592286.2	Ncoa3	nuclear receptor coactivator 3 (Ncoa3), transcript variant X1, mRNA	25.6	-1.99	2.8e-08
XM_006235643.4	Znfx1	zinc finger, NFX1-type containing 1 (Znfx1), transcript variant X2, mRNA	2.24	3.97	2.9e-08
XM_039079134.1	Irak3	interleukin-1 receptor-associated kinase 3 (Irak3), transcript variant X5, mRNA	5.43	3.33	3e-08
NM_001009542.2	Pdcd10	programmed cell death 10 (Pdcd10), mRNA	51.66	2.09	3e-08
NM_133427.3	Cyb5r4	cytochrome b5 reductase 4 (Cyb5r4), mRNA	13.92	2.35	3e-08
NM_001304290.1	Hid1	HID1 domain containing (Hid1), mRNA	1.2	14.56	3e-08
XM_039112262.1	Daam1	dishevelled associated activator of morphogenesis 1 (Daam1), transcript variant X3, mRNA	2.41	3.78	3e-08
XM_006247264.4	Ubtf	upstream binding transcription factor (Ubtf), transcript variant X2, mRNA	3.34	3.46	3.1e-08
XR_005492282.1	Cd244	CD244 molecule (Cd244), transcript variant X2, misc_RNA	15.06	-3.49	3.1e-08
XR_005493474.1	LOC120096689	uncharacterized LOC120096689 (LOC120096689), transcript variant X4, misc_RNA	0.97	4.06	3.1e-08
XM_006255246.3	Tbc1d9	TBC1 domain family member 9 (Tbc1d9), transcript variant X1, mRNA	3.16	-33.25	3.1e-08
XM_006231924.4	Mier3	MIER family member 3 (Mier3), transcript variant X3, mRNA	4.21	3.6	3.2e-08
XM_039095293.1	Map3k8	mitogen-activated protein kinase kinase kinase 8 (Map3k8), transcript variant X4, mRNA	1.12	32.08	3.3e-08
XM_039100551.1	Ints6l	integrator complex subunit 6 like (Ints6l), transcript variant X7, mRNA	9.23	-3.14	3.3e-08
XR_005500427.1	Ell2	elongation factor for RNA polymerase II 2 (Ell2), transcript variant X3, misc_RNA	2.24	7.95	3.3e-08
XM_039100480.1	Kdm5c	lysine demethylase 5C (Kdm5c), transcript variant X1, mRNA	1.15	-61.77	3.3e-08
NM_020090.1	Slc24a1	solute carrier family 24 member 1 (Slc24a1), mRNA	0.66	14.36	3.3e-08
NM_031357.2	Tpp1	tripeptidyl peptidase 1 (Tpp1), mRNA	32.91	-2.24	3.4e-08
XM_006246507.4	Tom1l2	target of myb1 like 2 membrane trafficking protein (Tom1l2), transcript variant X7, mRNA	3.9	2.95	3.5e-08
XM_039090517.1	Bcl3	BCL3, transcription coactivator (Bcl3), transcript variant X1, mRNA	2.09	11.44	3.5e-08
XM_039088493.1	Slc3a2	solute carrier family 3 member 2 (Slc3a2), transcript variant X2, mRNA	1.68	12.43	3.5e-08
NM_033299.2	Pld2	phospholipase D2 (Pld2), mRNA	3.49	-5.14	3.5e-08
NM_133512.2	Klrk1	killer cell lectin like receptor K1 (Klrk1), mRNA	42.37	2.4	3.7e-08
XM_006233337.3	Ube2d3	ubiquitin-conjugating enzyme E2D 3 (Ube2d3), transcript variant X5, mRNA	11.39	2.42	3.7e-08
XM_006235596.4	Sulf2	sulfatase 2 (Sulf2), transcript variant X1, mRNA	9.25	-23.36	3.7e-08
XM_017598628.2	LOC102556092	uncharacterized LOC102556092 (LOC102556092), transcript variant X1, mRNA	22.76	1.94	3.7e-08
NM_017343.2	Myl12b	myosin light chain 12B (Myl12b), mRNA	869.15	-1.99	3.7e-08
XM_039099063.1	Snx3	sorting nexin 3 (Snx3), transcript variant X1, mRNA	7.82	3.82	3.8e-08
XM_006243390.4	Tpm1	tropomyosin 1 (Tpm1), transcript variant X5, mRNA	1.56	14.54	3.8e-08
XM_008758988.3	Lilra5	leukocyte immunoglobulin like receptor A5 (Lilra5), transcript variant X1, mRNA	2.41	-58.04	3.9e-08
XM_039111892.1	Crim1	cysteine rich transmembrane BMP regulator 1 (Crim1), transcript variant X4, mRNA	3.4	4.28	3.9e-08
XM_039084185.1	Nab1	Ngfi-A binding protein 1 (Nab1), transcript variant X1, mRNA	13.23	2.15	3.9e-08
NM_001007677.1	Lyl1	LYL1, basic helix-loop-helix family member (Lyl1), mRNA	70.36	2.45	4e-08
XM_017592587.2	Clec4a2	C-type lectin domain family 4, member A2 (Clec4a2), transcript variant X1, mRNA	9.3	-9.59	4e-08
XM_039094611.1	Zmiz1	zinc finger, MIZ-type containing 1 (Zmiz1), transcript variant X4, mRNA	20.62	-4.05	4.1e-08
NM_001107344.2	Mylip	myosin regulatory light chain interacting protein (Mylip), mRNA	25.72	-2.52	4.1e-08
XM_039078440.1	Lyz2	lysozyme 2 (Lyz2), transcript variant X1, mRNA	3514.97	-2.96	4.1e-08
XM_039078982.1	Sbno2	strawberry notch homolog 2 (Sbno2), transcript variant X5, mRNA	4.41	4.28	4.3e-08
NM_001371300.1	Pik3cg	phosphatidylinositol-4,5-bisphosphate 3-kinase, catalytic subunit gamma (Pik3cg), mRNA	32.96	-2.18	4.3e-08
NM_001034932.1	C1qtnf6	C1q and TNF related 6 (C1qtnf6), mRNA	13.76	2.64	4.4e-08
NM_138890.3	Ehd3	EH-domain containing 3 (Ehd3), mRNA	55.01	2.13	4.4e-08
XR_005501178.1	LOC103691660	uncharacterized LOC103691660 (LOC103691660), transcript variant X2, ncRNA	1.71	-46.73	4.4e-08
NM_001011959.2	Ctsa	cathepsin A (Ctsa), mRNA	92.15	-2.17	4.5e-08
NM_001109318.1	Tasl	TLR adaptor interacting with endolysosomal SLC15A4 (Tasl), mRNA	7.29	3.26	4.5e-08
NM_134334.3	Ctsd	cathepsin D (Ctsd), mRNA	106.82	2.47	4.5e-08
NM_024147.2	Evl	Enah/Vasp-like (Evl), mRNA	32.03	2.14	4.5e-08
XM_006247523.4	Arhgap27	Rho GTPase activating protein 27 (Arhgap27), transcript variant X1, mRNA	2.71	-40.28	4.6e-08
XM_039094042.1	Vwa8	von Willebrand factor A domain containing 8 (Vwa8), transcript variant X1, mRNA	4.43	2.64	4.6e-08
XM_039097124.1	Reep2	receptor accessory protein 2 (Reep2), transcript variant X1, mRNA	3.04	6.98	4.6e-08
NM_001012029.1	Mnda	myeloid cell nuclear differentiation antigen (Mnda), mRNA	52.25	-4.78	4.7e-08
NM_053572.2	Cdhr1	cadherin-related family member 1 (Cdhr1), mRNA	17.93	-3.19	4.7e-08
XM_039093862.1	Nfkbid	NFKB inhibitor delta (Nfkbid), transcript variant X6, mRNA	6.23	3.13	4.7e-08
XM_039109964.1	Zfyve9	zinc finger FYVE-type containing 9 (Zfyve9), transcript variant X2, mRNA	2.14	-15.16	4.8e-08
NR_131104.1	LOC100912312	uncharacterized LOC100912312 (LOC100912312), long non-coding RNA	236.81	-2.89	4.8e-08
XM_006229011.4	Med25	mediator complex subunit 25 (Med25), transcript variant X5, mRNA	1.69	437.63	4.8e-08
XM_006244089.4	Slc25a38	solute carrier family 25, member 38 (Slc25a38), transcript variant X1, mRNA	3.57	8.55	4.8e-08
XM_039092924.1	Cracd	capping protein inhibiting regulator of actin dynamics (Cracd), transcript variant X6, mRNA	2.16	5.9	4.8e-08
NM_001105833.1	Phospho1	phosphoethanolamine/phosphocholine phosphatase 1 (Phospho1), mRNA	46.65	3.19	4.8e-08
NM_053297.2	Pkm	pyruvate kinase M1/2 (Pkm), mRNA	29.9	2.66	4.8e-08
XM_039100212.1	Nhsl2	NHS-like 2 (Nhsl2), transcript variant X4, mRNA	0.78	-500.98	4.8e-08
XM_039083037.1	Man2a1	mannosidase, alpha, class 2A, member 1 (Man2a1), transcript variant X1, mRNA	22.04	-1.97	4.8e-08
NM_001004238.1	Rab21	RAB21, member RAS oncogene family (Rab21), mRNA	32.88	2.09	4.9e-08
XM_039093301.1	Irf9	interferon regulatory factor 9 (Irf9), transcript variant X6, mRNA	16.55	2.45	4.9e-08
NM_001008328.1	Parp3	poly (ADP-ribose) polymerase family, member 3 (Parp3), mRNA	2.11	7.11	4.9e-08
XM_017595706.2	Zbtb16	zinc finger and BTB domain containing 16 (Zbtb16), transcript variant X3, mRNA	1.59	-17.07	5e-08
XM_006254312.4	Arl5b	ADP-ribosylation factor like GTPase 5B (Arl5b), transcript variant X1, mRNA	5.86	2.22	5e-08
XM_039093607.1	Ptk2b	protein tyrosine kinase 2 beta (Ptk2b), transcript variant X1, mRNA	21.93	2.31	5e-08
XM_006232952.4	Sv2a	synaptic vesicle glycoprotein 2a (Sv2a), transcript variant X1, mRNA	5.38	2.64	5e-08
XM_008760736.3	Il6st	interleukin 6 signal transducer (Il6st), transcript variant X2, mRNA	2.12	4.63	5e-08
NM_001173376.2	Dusp3	dual specificity phosphatase 3 (Dusp3), mRNA	7.59	-6.2	5e-08
NM_001190238.1	Psap	prosaposin (Psap), transcript variant 4, mRNA	51.78	-2.53	5e-08
NM_001025137.2	Ier5	immediate early response 5 (Ier5), mRNA	38.04	2.34	5.1e-08
NM_001033970.1	Pip5k1c	phosphatidylinositol-4-phosphate 5-kinase type 1 gamma (Pip5k1c), transcript variant b, mRNA	28.44	-1.99	5.2e-08
NM_001134702.1	Meis1	Meis homeobox 1 (Meis1), mRNA	1.28	9.46	5.2e-08
XM_039098960.1	RT1-CE4	RT1 class I, locus CE4 (RT1-CE4), transcript variant X2, mRNA	56.29	1.97	5.3e-08
NM_001009536.1	Trim25	tripartite motif-containing 25 (Trim25), mRNA	22.31	2.08	5.4e-08
XM_039082057.1	S1pr5	sphingosine-1-phosphate receptor 5 (S1pr5), transcript variant X3, mRNA	1.94	-319.52	5.4e-08
NM_001098782.1	Serf2	small EDRK-rich factor 2 (Serf2), mRNA	48.65	2.02	5.4e-08
XM_017598454.2	LOC685157	similar to paired immunoglobin-like type 2 receptor beta (LOC685157), transcript variant X1, mRNA	3.82	-28.09	5.4e-08
NM_001100998.1	Rtl8a	retrotransposon Gag like 8A (Rtl8a), mRNA	32.27	-2.97	5.4e-08
XM_039109619.1	Csf3r	colony stimulating factor 3 receptor (Csf3r), transcript variant X4, mRNA	6.22	4.34	5.4e-08
XM_006236653.4	Rnf103	ring finger protein 103 (Rnf103), transcript variant X1, mRNA	5.92	3.09	5.5e-08
NM_001001513.2	Tnfsf12	TNF superfamily member 12 (Tnfsf12), mRNA	23.62	-3.75	5.5e-08
NM_022303.2	Card9	caspase recruitment domain family, member 9 (Card9), mRNA	8.86	-22.83	5.5e-08
NM_031146.2	Arpc1a	actin related protein 2/3 complex, subunit 1A (Arpc1a), mRNA	36.63	2.16	5.5e-08
XM_039090938.1	Taf1a	TATA-box binding protein associated factor, RNA polymerase I subunit A (Taf1a), transcript variant X5, mRNA	0.82	8.77	5.6e-08
NM_001108355.1	Cnot6l	CCR4-NOT transcription complex, subunit 6-like (Cnot6l), mRNA	35.88	-2.04	5.6e-08
NM_198748.1	Scin	scinderin (Scin), mRNA	19.26	-3.13	5.8e-08
XM_003748695.5	Tagap	T-cell activation RhoGTPase activating protein (Tagap), transcript variant X1, mRNA	52.34	2.06	5.8e-08
XM_006255708.4	Crispld2	cysteine-rich secretory protein LCCL domain containing 2 (Crispld2), transcript variant X1, mRNA	5.53	9.04	5.9e-08
XM_008773149.2	Arhgap6	Rho GTPase activating protein 6 (Arhgap6), transcript variant X5, mRNA	4.36	3.23	5.9e-08
NM_001137564.2	Mt2A	metallothionein 2A (Mt2A), mRNA	3.62	127.86	6e-08
NM_001376043.1	Sgk3	serum/glucocorticoid regulated kinase family, member 3 (Sgk3), mRNA	9.86	-3.57	6e-08
NM_022441.2	Acvrl1	activin A receptor like type 1 (Acvrl1), mRNA	1.43	-42.17	6e-08
XR_005496955.1	LOC120098595	uncharacterized LOC120098595 (LOC120098595), ncRNA	3.39	21.8	6e-08
XM_006254813.4	Csf1r	colony stimulating factor 1 receptor (Csf1r), transcript variant X1, mRNA	156.18	-29.16	6e-08
XM_039108024.1	Ly49si1	immunoreceptor Ly49si1 (Ly49si1), transcript variant X1, mRNA	5.8	-15.87	6.1e-08
XM_006257158.3	Cysltr1	cysteinyl leukotriene receptor 1 (Cysltr1), transcript variant X1, mRNA	2.41	-8.06	6.2e-08
XM_008763704.1	Tdrd7	tudor domain containing 7 (Tdrd7), transcript variant X4, mRNA	5.55	2.8	6.3e-08
XM_039087515.1	Tbc1d16	TBC1 domain family, member 16 (Tbc1d16), transcript variant X1, mRNA	5.01	-7.04	6.3e-08
XM_039090272.1	Fcgr2a	Fc fragment of IgG, low affinity IIa, receptor (Fcgr2a), transcript variant X5, mRNA	4.28	8.23	6.3e-08
XM_039112353.1	Gpr68	G protein-coupled receptor 68 (Gpr68), transcript variant X2, mRNA	7.56	-4.96	6.4e-08
XM_006242207.3	Plxnb2	plexin B2 (Plxnb2), transcript variant X3, mRNA	1.44	-47	6.4e-08
NM_022296.2	Xylt2	xylosyltransferase 2 (Xylt2), mRNA	10.06	-3.39	6.5e-08
NM_053366.1	Rab6a	RAB6A, member RAS oncogene family (Rab6a), mRNA	12.08	2.17	6.6e-08
XM_006228804.4	Nfkbid	NFKB inhibitor delta (Nfkbid), transcript variant X5, mRNA	1.68	11.83	7e-08
XM_039094600.1	Erich1	glutamate-rich 1 (Erich1), transcript variant X5, mRNA	6.09	11.1	7e-08
NM_138913.2	Oas1a	2'-5' oligoadenylate synthetase 1A (Oas1a), mRNA	3.5	10.68	7e-08
XM_220219.11	Abca3	ATP binding cassette subfamily A member 3 (Abca3), transcript variant X3, mRNA	6.77	-2.99	7e-08
XM_039096836.1	Csf1r	colony stimulating factor 1 receptor (Csf1r), transcript variant X3, mRNA	4.91	4.01	7e-08
NM_001109120.1	Mboat1	membrane bound O-acyltransferase domain containing 1 (Mboat1), mRNA	9.82	-4.8	7e-08
NM_031331.1	Psmd4	proteasome 26S subunit, non-ATPase 4 (Psmd4), mRNA	27.95	2.35	7.2e-08
NM_001108340.1	Hscb	HscB mitochondrial iron-sulfur cluster co-chaperone (Hscb), mRNA	20.78	3.56	7.5e-08
XR_005489960.1	Ciita	class II, major histocompatibility complex, transactivator (Ciita), transcript variant X2, misc_RNA	0.96	-52.53	7.6e-08
XM_006244488.4	Treml4	triggering receptor expressed on myeloid cells-like 4 (Treml4), transcript variant X3, mRNA	3.69	-8.43	7.6e-08
XM_008768394.3	Cd300e	Cd300e molecule (Cd300e), transcript variant X2, mRNA	6.48	-24.17	7.6e-08
NM_001305180.1	Tigd2	tigger transposable element derived 2 (Tigd2), mRNA	17.46	2.03	7.8e-08
XM_006243409.4	Mapk6	mitogen-activated protein kinase 6 (Mapk6), transcript variant X1, mRNA	1.58	13.72	7.8e-08
XM_039104281.1	Ptpn1	protein tyrosine phosphatase, non-receptor type 1 (Ptpn1), transcript variant X1, mRNA	17.18	2.28	7.9e-08
XM_039101120.1	Trim30	tripartite motif-containing 30 (Trim30), transcript variant X5, mRNA	23.03	2.92	8e-08
XR_005494409.1	LOC120097171	uncharacterized LOC120097171 (LOC120097171), transcript variant X1, ncRNA	0.4	-35.29	8.2e-08
XM_039085773.1	Timp2	TIMP metallopeptidase inhibitor 2 (Timp2), transcript variant X1, mRNA	10.91	-4.03	8.4e-08
NM_138848.1	Podxl	podocalyxin-like (Podxl), mRNA	0.23	27.65	8.4e-08
NM_017124.1	Cd37	CD37 molecule (Cd37), mRNA	125.48	-2.21	8.5e-08
XM_039081250.1	Ngp	neutrophilic granule protein (Ngp), transcript variant X2, mRNA	4.57	11.37	8.5e-08
NM_001108821.1	Abcd1	ATP binding cassette subfamily D member 1 (Abcd1), mRNA	8.03	-4.77	8.6e-08
NM_001007725.1	Icam2	intercellular adhesion molecule 2 (Icam2), mRNA	9.26	-8.03	8.6e-08
XM_039109623.1	Csf3r	colony stimulating factor 3 receptor (Csf3r), transcript variant X8, mRNA	8.24	3.48	8.6e-08
NM_001025708.1	Ogfrl1	opioid growth factor receptor-like 1 (Ogfrl1), mRNA	46.08	2.1	8.6e-08
XR_001841799.2	LOC108348513	uncharacterized LOC108348513 (LOC108348513), transcript variant X2, ncRNA	26.46	2.15	8.8e-08
XM_039098427.1	RT1-A2	RT1 class Ia, locus A2 (RT1-A2), transcript variant X3, mRNA	20.94	2.28	8.9e-08
XM_017591497.2	Sirpa	signal-regulatory protein alpha (Sirpa), transcript variant X5, mRNA	79.61	-3.05	9e-08
XM_006238793.4	Mycl	MYCL proto-oncogene, bHLH transcription factor (Mycl), transcript variant X1, mRNA	1.19	-41.09	9.1e-08
XM_039111095.1	Focad	focadhesin (Focad), transcript variant X5, mRNA	8.72	2.44	9.2e-08
XM_006239218.4	Rcan3	RCAN family member 3 (Rcan3), transcript variant X2, mRNA	8.67	-2.98	9.2e-08
XM_039106452.1	Far1	fatty acyl CoA reductase 1 (Far1), transcript variant X4, mRNA	6.76	3.61	9.3e-08
XM_006234596.4	Dgkz	diacylglycerol kinase zeta (Dgkz), transcript variant X4, mRNA	49.43	-4.57	9.4e-08
NM_001106198.1	Pgbd5	piggyBac transposable element derived 5 (Pgbd5), mRNA	1.09	13.21	9.4e-08
XM_001072955.7	LOC690020	similar to killer cell lectin-like receptor, subfamily A, member 17 (LOC690020), transcript variant X1, mRNA	1.16	71.9	9.5e-08
NM_019209.1	Urod	uroporphyrinogen decarboxylase (Urod), mRNA	19.23	3.34	9.5e-08
NM_001169142.1	Nlrp12	NLR family, pyrin domain containing 12 (Nlrp12), mRNA	2.41	-21.39	9.6e-08
NM_183331.2	F8	coagulation factor VIII (F8), mRNA	8.07	-2.21	9.6e-08
XM_039083991.1	Rasgrp2	RAS guanyl releasing protein 2 (Rasgrp2), transcript variant X7, mRNA	4.05	6.35	9.8e-08
NR_132107.1	Mir155hg	Mir155 host gene (Mir155hg), long non-coding RNA	3.91	8.06	1e-07
NM_001106288.1	Swap70	switching B-cell complex subunit SWAP70 (Swap70), mRNA	24.77	-2.18	1e-07
XM_039086944.1	Pafah1b1	platelet-activating factor acetylhydrolase 1b, regulatory subunit 1 (Pafah1b1), transcript variant X2, mRNA	9.13	2	1e-07
XM_039104245.1	Il1a	interleukin 1 alpha (Il1a), transcript variant X2, mRNA	3.67	3131.76	1.1e-07
XM_039108587.1	LOC103690031	sterile alpha motif domain-containing protein 9-like (LOC103690031), transcript variant X3, mRNA	2.63	3.09	1.1e-07
XM_006228225.4	Lilra5	leukocyte immunoglobulin like receptor A5 (Lilra5), transcript variant X2, mRNA	4.1	-287.93	1.1e-07
XM_006232518.4	Gucy1a1	guanylate cyclase 1 soluble subunit alpha 1 (Gucy1a1), transcript variant X1, mRNA	3.7	3.63	1.1e-07
XM_039095164.1	Ddx60	DEXD/H-box helicase 60 (Ddx60), transcript variant X3, mRNA	0.69	7	1.1e-07
XM_006257056.3	Ogt	O-linked N-acetylglucosamine (GlcNAc) transferase (Ogt), transcript variant X1, mRNA	59.12	-2.12	1.1e-07
XM_001054584.7	Glipr2	GLI pathogenesis-related 2 (Glipr2), transcript variant X2, mRNA	44.06	2.62	1.1e-07
NM_001277212.1	Dbnl	drebrin-like (Dbnl), transcript variant 3, mRNA	33.1	2.01	1.2e-07
NM_001044293.1	Nap1l5	nucleosome assembly protein 1-like 5 (Nap1l5), mRNA	1.07	19.16	1.2e-07
XM_039093447.1	Ube2e2	ubiquitin-conjugating enzyme E2E 2 (Ube2e2), transcript variant X3, mRNA	3.92	6.05	1.2e-07
XM_006243393.3	Tpm1	tropomyosin 1 (Tpm1), transcript variant X7, mRNA	4.97	9.41	1.2e-07
XM_006256896.3	Ctps2	CTP synthase 2 (Ctps2), transcript variant X1, mRNA	13.22	-2.92	1.2e-07
XM_039110697.1	Rhd	Rh blood group, D antigen (Rhd), transcript variant X3, mRNA	7.45	6.09	1.3e-07
NM_057186.2	Hadh	hydroxyacyl-CoA dehydrogenase (Hadh), mRNA; nuclear gene for mitochondrial product	9.24	-5.31	1.3e-07
XM_006251218.4	Myo1g	myosin IG (Myo1g), transcript variant X1, mRNA	141.38	-2.35	1.3e-07
NM_053569.2	Mbtps1	membrane-bound transcription factor peptidase, site 1 (Mbtps1), mRNA	20.57	-2.24	1.3e-07
XM_008765604.3	Slc45a4	solute carrier family 45, member 4 (Slc45a4), transcript variant X4, mRNA	1.63	3.39	1.3e-07
XM_039078767.1	Trps1	transcriptional repressor GATA binding 1 (Trps1), transcript variant X7, mRNA	1.01	-40.27	1.3e-07
NM_001163568.2	Fam102b	family with sequence similarity 102, member B (Fam102b), mRNA	6.01	-3.79	1.3e-07
NM_017175.2	Pkn1	protein kinase N1 (Pkn1), mRNA	46.17	-2.56	1.3e-07
NM_012766.2	Ccnd3	cyclin D3 (Ccnd3), mRNA	89.4	2.27	1.3e-07
XR_005490015.1	LOC120095026	uncharacterized LOC120095026 (LOC120095026), transcript variant X2, ncRNA	0.65	65.66	1.3e-07
XM_006254850.4	Fech	ferrochelatase (Fech), transcript variant X1, mRNA	22.48	5.34	1.4e-07
NM_001115044.1	LOC685157	similar to paired immunoglobin-like type 2 receptor beta (LOC685157), mRNA	8.92	-9.31	1.4e-07
XM_039096759.1	Cd226	CD226 molecule (Cd226), transcript variant X4, mRNA	3.86	3.98	1.4e-07
XM_039111806.1	Fosl2	FOS like 2, AP-1 transcription factor subunit (Fosl2), transcript variant X1, mRNA	15.02	2.35	1.4e-07
NM_001379478.1	Pid1	phosphotyrosine interaction domain containing 1 (Pid1), mRNA	1.48	-54.4	1.4e-07
NM_001012174.2	Fkbp5	FKBP prolyl isomerase 5 (Fkbp5), mRNA	22.85	1.96	1.4e-07
NM_012756.2	Igf2r	insulin-like growth factor 2 receptor (Igf2r), mRNA	6.32	2.24	1.4e-07
NM_022689.2	Snap23	synaptosome associated protein 23 (Snap23), mRNA	28.72	1.96	1.4e-07
NM_001111310.1	LOC497796	hypothetical protein LOC497796 (LOC497796), mRNA	9.26	-11.32	1.4e-07
NM_001106817.1	Bcl9l	BCL9 like (Bcl9l), mRNA	14.2	-2.47	1.5e-07
XM_017595280.2	Gramd4	GRAM domain containing 4 (Gramd4), transcript variant X2, mRNA	8.61	-3.58	1.5e-07
XM_006242912.4	Fxyd2	FXYD domain-containing ion transport regulator 2 (Fxyd2), transcript variant X2, mRNA	34.89	-11.51	1.5e-07
XM_006250980.3	Atp8a1	ATPase phospholipid transporting 8A1 (Atp8a1), transcript variant X6, mRNA	3.72	3.54	1.5e-07
XM_039104987.1	Slc24a5	solute carrier family 24 member 5 (Slc24a5), transcript variant X1, mRNA	1.56	13.35	1.6e-07
XM_006232957.4	Otud7b	OTU deubiquitinase 7B (Otud7b), transcript variant X1, mRNA	4.57	2.29	1.6e-07
NM_001108434.1	Fech	ferrochelatase (Fech), mRNA	38.45	4.44	1.6e-07
XR_005501156.1	LOC103691647	uncharacterized LOC103691647 (LOC103691647), transcript variant X2, ncRNA	1.15	28.71	1.6e-07
XM_039103865.1	LOC685067	similar to guanylate binding protein family, member 6 (LOC685067), transcript variant X3, mRNA	37.6	3.04	1.6e-07
NM_138524.2	A3galt2	alpha 1,3-galactosyltransferase 2 (A3galt2), mRNA	2.5	9.11	1.6e-07
XM_017590104.2	Cd33	CD33 molecule (Cd33), transcript variant X2, mRNA	4.84	7.39	1.6e-07
NM_020542.2	Ccr1	C-C motif chemokine receptor 1 (Ccr1), mRNA	67.8	2.5	1.6e-07
NM_001012189.1	Lpcat3	lysophosphatidylcholine acyltransferase 3 (Lpcat3), mRNA	28.99	2.07	1.6e-07
NM_001170459.1	Tns3	tensin 3 (Tns3), mRNA	3.43	-13.09	1.6e-07
XM_039104341.1	Tyro3	TYRO3 protein tyrosine kinase (Tyro3), transcript variant X1, mRNA	2.63	3.98	1.6e-07
NM_001134555.2	C1r	complement C1r (C1r), mRNA	2.8	4.71	1.7e-07
NM_001009719.1	Cdkn2d	similar to cyclin-dependent kinase inhibitor 2D (Cdkn2d), mRNA	33.61	2.36	1.7e-07
NM_001106166.1	Tk2	thymidine kinase 2 (Tk2), mRNA	19.79	-2.71	1.7e-07
NM_001004090.2	Tspan5	tetraspanin 5 (Tspan5), mRNA	4.35	3.59	1.7e-07
XM_006233886.4	Setx	senataxin (Setx), transcript variant X2, mRNA	28.48	-2.03	1.7e-07
NM_198769.2	Tlr2	toll-like receptor 2 (Tlr2), mRNA	18.42	2.43	1.7e-07
NM_001164264.1	Rnf187	ring finger protein 187 (Rnf187), mRNA	22.92	2.58	1.7e-07
NM_012912.2	Atf3	activating transcription factor 3 (Atf3), mRNA	3.36	5.43	1.7e-07
NM_001191952.1	Fxn	frataxin (Fxn), nuclear gene encoding mitochondrial protein, mRNA	11.07	4.86	1.7e-07
XR_005496027.1	Pstpip2	proline-serine-threonine phosphatase-interacting protein 2 (Pstpip2), transcript variant X2, misc_RNA	17.59	2.45	1.7e-07
XM_006244347.4	Nrtn	neurturin (Nrtn), transcript variant X1, mRNA	2.39	10.07	1.8e-07
NM_053840.2	Ggt1	gamma-glutamyltransferase 1 (Ggt1), mRNA	6	5.27	1.8e-07
XM_006256929.4	Sh3kbp1	SH3 domain-containing kinase-binding protein 1 (Sh3kbp1), transcript variant X7, mRNA	35.27	-2.72	1.8e-07
XM_039079579.1	Triobp	TRIO and F-actin binding protein (Triobp), transcript variant X2, mRNA	1.21	4.01	1.9e-07
XM_039108386.1	Klra17	killer cell lectin-like receptor, subfamily A, member 17 (Klra17), transcript variant X2, mRNA	6.55	-9.15	1.9e-07
XM_006231600.4	Add3	adducin 3 (Add3), transcript variant X2, mRNA	1.48	-40.49	1.9e-07
NM_139098.1	Ddx46	DEAD-box helicase 46 (Ddx46), mRNA	58.95	-2.01	1.9e-07
NM_001110141.1	Eif5b	eukaryotic translation initiation factor 5B (Eif5b), mRNA	45.96	2.34	1.9e-07
XM_039092718.1	Atp10d	ATPase phospholipid transporting 10D (putative) (Atp10d), transcript variant X1, mRNA	8.64	2.22	1.9e-07
XM_039090065.1	Trim56	tripartite motif containing 56 (Trim56), transcript variant X1, mRNA	24.46	1.95	2e-07
NM_053415.1	Cxcr3	C-X-C motif chemokine receptor 3 (Cxcr3), mRNA	12.03	-4.44	2e-07
XM_006246362.4	Tcf7	transcription factor 7 (Tcf7), transcript variant X2, mRNA	151.05	-2.4	2e-07
XM_039087789.1	Cd300ld	Cd300 molecule-like family member D (Cd300ld), transcript variant X6, mRNA	7.62	-11.97	2e-07
XM_006233194.4	Sort1	sortilin 1 (Sort1), transcript variant X1, mRNA	1.36	3876.99	2e-07
XM_006240248.4	Max	MYC associated factor X (Max), transcript variant X1, mRNA	129.51	1.86	2e-07
NM_001170456.1	Dipk1a	divergent protein kinase domain 1A (Dipk1a), mRNA	14.49	-2.92	2e-07
XM_039105966.1	Src	SRC proto-oncogene, non-receptor tyrosine kinase (Src), transcript variant X14, mRNA	1	7.6	2e-07
NM_138518.2	Crispld2	cysteine-rich secretory protein LCCL domain containing 2 (Crispld2), mRNA	2.63	24.48	2.1e-07
XM_017593804.2	Mpl	MPL proto-oncogene, thrombopoietin receptor (Mpl), transcript variant X1, mRNA	0.79	125.24	2.1e-07
XM_006230622.4	Cttn	cortactin (Cttn), transcript variant X1, mRNA	2.17	8.44	2.1e-07
XM_039083404.1	Sp110	SP110 nuclear body protein (Sp110), transcript variant X4, mRNA	7.25	3.83	2.1e-07
XM_006236089.4	Asns	asparagine synthetase (glutamine-hydrolyzing) (Asns), transcript variant X1, mRNA	7.65	2.65	2.1e-07
XR_005489947.1	Sytl3	synaptotagmin-like 3 (Sytl3), transcript variant X6, misc_RNA	1.43	15.7	2.1e-07
NM_001191641.1	Trim58	tripartite motif-containing 58 (Trim58), mRNA	3.33	7.95	2.1e-07
XM_039098159.1	Amfr	autocrine motility factor receptor (Amfr), mRNA	22.01	2.25	2.2e-07
XR_005500302.1	Mov10	Mov10 RISC complex RNA helicase (Mov10), transcript variant X1, misc_RNA	58.01	2.21	2.2e-07
NM_001191808.1	Pard3b	par-3 family cell polarity regulator beta (Pard3b), mRNA	0.78	10.08	2.2e-07
NM_001191639.1	Coro7	coronin 7 (Coro7), mRNA	33.09	-2.2	2.2e-07
NM_032056.3	Tap2	transporter 2, ATP binding cassette subfamily B member (Tap2), mRNA	62.59	2	2.2e-07
XM_039078437.1	Tmbim6	transmembrane BAX inhibitor motif containing 6 (Tmbim6), transcript variant X3, mRNA	6.73	3.68	2.2e-07
XM_017598386.2	Lrch4	leucine rich repeats and calponin homology domain containing 4 (Lrch4), transcript variant X6, mRNA	47.86	-2.29	2.2e-07
XM_039096569.1	Mbp	myelin basic protein (Mbp), transcript variant X4, mRNA	1.31	8.08	2.3e-07
NM_181625.1	Retnlg	resistin-like gamma (Retnlg), mRNA	5.73	13.53	2.3e-07
XM_008767581.3	Crebrf	CREB3 regulatory factor (Crebrf), transcript variant X4, mRNA	0.84	-339.87	2.3e-07
XM_002727721.4	LOC100360645	ubiquitin B-like (LOC100360645), mRNA	32.81	4.32	2.3e-07
XR_005498124.1	LOC102554200	zinc finger protein 271-like (LOC102554200), misc_RNA	21.13	-2.08	2.3e-07
XM_039086457.1	Tnip1	TNFAIP3 interacting protein 1 (Tnip1), transcript variant X2, mRNA	3.9	3.7	2.3e-07
XM_039083681.1	Tuba4a	tubulin, alpha 4A (Tuba4a), transcript variant X2, mRNA	1.93	7.69	2.3e-07
XM_039079990.1	Socs2	suppressor of cytokine signaling 2 (Socs2), transcript variant X1, mRNA	0.63	10.49	2.4e-07
XM_017599147.2	Ctbp1	C-terminal binding protein 1 (Ctbp1), transcript variant X3, mRNA	16.85	2.28	2.4e-07
XR_005501201.1	LOC120100912	uncharacterized LOC120100912 (LOC120100912), ncRNA	5.1	7.17	2.5e-07
NM_199105.2	Gask1b	golgi associated kinase 1B (Gask1b), mRNA	1.72	-26.89	2.5e-07
NM_012914.1	Atp2a3	ATPase sarcoplasmic/endoplasmic reticulum Ca2+ transporting 3 (Atp2a3), mRNA	35.15	2.05	2.5e-07
NM_001106067.2	Colgalt1	collagen beta(1-O)galactosyltransferase 1 (Colgalt1), mRNA	26.23	-2.15	2.5e-07
XM_039083601.1	Hecw2	HECT, C2 and WW domain containing E3 ubiquitin protein ligase 2 (Hecw2), transcript variant X6, mRNA	0.67	-8.82	2.5e-07
NM_001013174.1	Laptm4b	lysosomal protein transmembrane 4 beta (Laptm4b), mRNA	19.56	2.2	2.5e-07
NM_175756.2	Fcgr2b	Fc fragment of IgG receptor IIb (Fcgr2b), mRNA	27.67	3.03	2.6e-07
XM_006245796.4	Mgrn1	mahogunin ring finger 1 (Mgrn1), transcript variant X4, mRNA	2.68	7.54	2.6e-07
NM_013069.2	Cd74	CD74 molecule (Cd74), mRNA	1476.05	-2.13	2.6e-07
XM_039108584.1	LOC120102230	sterile alpha motif domain-containing protein 9-like (LOC120102230), mRNA	9.08	2.38	2.7e-07
NM_001009176.2	Trim10	tripartite motif-containing 10 (Trim10), mRNA	4.37	5.14	2.7e-07
XR_005494388.1	LOC120097152	uncharacterized LOC120097152 (LOC120097152), ncRNA	1.94	8.71	2.7e-07
NM_134327.2	Cd69	Cd69 molecule (Cd69), mRNA	49.09	2.24	2.7e-07
NM_001100858.1	Top2b	DNA topoisomerase II beta (Top2b), mRNA	53	-2.03	2.7e-07
NM_001077674.1	Hlx	H2.0-like homeobox (Hlx), mRNA	10.34	3.05	2.7e-07
XR_005494411.1	LOC120097171	uncharacterized LOC120097171 (LOC120097171), transcript variant X3, ncRNA	0.32	-108.2	2.7e-07
NM_001025422.1	Irak2	interleukin-1 receptor-associated kinase 2 (Irak2), mRNA	9.24	2.52	2.8e-07
NM_001105948.2	Serpinb8	serpin family B member 8 (Serpinb8), mRNA	2.47	-19.72	2.8e-07
XM_039098962.1	RT1-CE4	RT1 class I, locus CE4 (RT1-CE4), transcript variant X4, mRNA	39.32	2.29	2.8e-07
XM_006247872.3	Baiap2	BAR/IMD domain containing adaptor protein 2 (Baiap2), transcript variant X4, mRNA	4.67	-6.02	2.8e-07
XM_039081813.1	Csrnp1	cysteine and serine rich nuclear protein 1 (Csrnp1), transcript variant X2, mRNA	3.95	3.08	2.8e-07
XM_039084521.1	LOC102551518	uncharacterized LOC102551518 (LOC102551518), transcript variant X1, mRNA	22.11	2.08	2.8e-07
XM_006252403.3	Klf5	Kruppel-like factor 5 (Klf5), transcript variant X1, mRNA	3.31	13.07	3e-07
XM_006228040.4	Lilrb1	leukocyte immunoglobulin like receptor B1 (Lilrb1), transcript variant X4, mRNA	16.38	-3.91	3e-07
NM_001135009.1	Col4a1	collagen type IV alpha 1 chain (Col4a1), mRNA	0.43	8.42	3e-07
XM_006253578.4	Tifab	TIFA inhibitor (Tifab), transcript variant X1, mRNA	11.12	-22.64	3e-07
NM_001271384.1	Epm2aip1	EPM2A interacting protein 1 (Epm2aip1), mRNA	14.91	-1.99	3.1e-07
XM_039083175.1	Trem1	triggering receptor expressed on myeloid cells 1 (Trem1), transcript variant X2, mRNA	9.56	4.1	3.1e-07
NM_001110318.2	Tprg1l	tumor protein p63 regulated 1-like (Tprg1l), transcript variant 1, mRNA	89.62	2.09	3.1e-07
NM_001191760.1	Dock11	dedicator of cytokinesis 11 (Dock11), mRNA	30.85	-1.9	3.1e-07
XM_039081722.1	Cadm1	cell adhesion molecule 1 (Cadm1), transcript variant X2, mRNA	1.66	-17.88	3.2e-07
XM_039087982.1	Fgd4	FYVE, RhoGEF and PH domain containing 4 (Fgd4), transcript variant X2, mRNA	16.06	-8.31	3.2e-07
XR_001841680.2	LOC102557538	uncharacterized LOC102557538 (LOC102557538), ncRNA	10.84	-3.39	3.2e-07
XM_039080222.1	Ago2	argonaute RISC catalytic component 2 (Ago2), transcript variant X2, mRNA	5	2.47	3.2e-07
XM_006247078.4	Vmp1	vacuole membrane protein 1 (Vmp1), transcript variant X1, mRNA	7.18	-8.41	3.2e-07
NR_102353.1	Patz1	POZ (BTB) and AT hook containing zinc finger 1 (Patz1), transcript variant 4, non-coding RNA	9.76	2.86	3.3e-07
XM_008766309.3	Fam219b	family with sequence similarity 219, member B (Fam219b), transcript variant X1, mRNA	7.01	2.65	3.3e-07
NM_001108471.1	Ube2m	ubiquitin-conjugating enzyme E2M (Ube2m), mRNA	22.83	2.2	3.3e-07
XM_017589892.2	Tiam2	TIAM Rac1 associated GEF 2 (Tiam2), transcript variant X4, mRNA	0.53	-106.48	3.3e-07
XM_039094821.1	Sin3b	SIN3 transcription regulator family member B (Sin3b), transcript variant X1, mRNA	32.22	1.93	3.3e-07
XM_017593049.2	LOC689800	similar to osteoclast inhibitory lectin (LOC689800), transcript variant X1, mRNA	21.11	-4.09	3.3e-07
XR_005498531.1	LOC120099372	uncharacterized LOC120099372 (LOC120099372), transcript variant X2, ncRNA	11.28	2.6	3.4e-07
XM_006246133.4	Ccnjl	cyclin J-like (Ccnjl), transcript variant X1, mRNA	2.52	5.15	3.4e-07
XM_039079928.1	Tmem71	transmembrane protein 71 (Tmem71), transcript variant X2, mRNA	39.14	-2.15	3.4e-07
XM_039078344.1	Csf2rb	colony stimulating factor 2 receptor subunit beta (Csf2rb), transcript variant X3, mRNA	1.91	5.16	3.4e-07
XM_039109621.1	Csf3r	colony stimulating factor 3 receptor (Csf3r), transcript variant X6, mRNA	53.85	2.75	3.4e-07
XM_039113094.1	Asxl2	ASXL transcriptional regulator 2 (Asxl2), mRNA	10.15	-1.89	3.4e-07
XM_039109963.1	Zfyve9	zinc finger FYVE-type containing 9 (Zfyve9), transcript variant X1, mRNA	0.99	-254.05	3.5e-07
XM_008761127.3	Il6r	interleukin 6 receptor (Il6r), transcript variant X1, mRNA	21.08	-2.68	3.6e-07
XR_356224.3	LOC102549755	uncharacterized LOC102549755 (LOC102549755), transcript variant X1, ncRNA	3.18	8.49	3.6e-07
XM_006250107.4	Rabgap1l	RAB GTPase activating protein 1-like (Rabgap1l), transcript variant X4, mRNA	2.08	5.09	3.6e-07
XM_039093326.1	Wdfy2	WD repeat and FYVE domain containing 2 (Wdfy2), transcript variant X5, mRNA	7.2	-6.06	3.6e-07
XM_039108033.1	Ly49si2	immunoreceptor Ly49si2 (Ly49si2), transcript variant X1, mRNA	10.4	-3.25	3.7e-07
XM_006256515.4	Pkib	cAMP-dependent protein kinase inhibitor beta (Pkib), transcript variant X4, mRNA	1.54	13.9	3.7e-07
[truncated: 97,128 more rows]
